# Supplementary material for: Prognostic algorithms for post-discharge readmission and mortality among mother-infant dyads: an observational study protocol
Source: PubMed Central journal article supplement (PMC10911031; doi:10.3389/fepid.2023.1233323), 2023-11-29
Supplement: Datasheet3.pdf [file Datasheet3.pdf]

**Appendix I: Smart Discharges for Mom & Baby  
Data Dictionary Codebook**

| #                                                                           | Variable / Field Name                                                                | Field Label<br><i>Field Note</i>             | Field Attributes (Field Type, Validation, Choices, Calculations, etc.) |
|-----------------------------------------------------------------------------|--------------------------------------------------------------------------------------|----------------------------------------------|------------------------------------------------------------------------|
| Instrument: <b>1. Admission Subject Details</b> (admission_subject_details) |                                                                                      |                                              |                                                                        |
| 24                                                                          | [admitdate_adm_v2]                                                                   | Date of admission                            | text (date_dmy)                                                        |
| 25                                                                          | [admittime_adm_v2]                                                                   | Time of admission (USE 24 HOUR TIME - HH:MM) | text (time)                                                            |
| 36                                                                          | [dobknown_adm_v2]                                                                    | Is exact date of birth known?                | yesno                                                                  |
| 37                                                                          | [dob_adm_v2]<br>Show the field ONLY if:<br>[dobknown_adm_v2] = '1'                   | Date of birth                                |                                                                        |
| 38                                                                          | [dob_estage_adm_v2]<br>Show the field ONLY if:<br>[dobknown_adm_v2] = '0'            | What is her estimated age in years?          |                                                                        |
|                                                                             | Questions: 1-23 and 38-41 capture screening criteria and participant contact details |                                              |                                                                        |
|                                                                             |                                                                                      |                                              |                                                                        |

| Instrument: <b>2. Admission</b> (admission) |                                                                        |                                                                                                   |                                                                                                                                                                                                                                                                                                                                                                                                                                                                                                                                                    |   |                      |                                                     |                      |              |                               |   |                                                   |                                                                                 |                    |              |                                 |    |               |       |    |               |      |
|---------------------------------------------|------------------------------------------------------------------------|---------------------------------------------------------------------------------------------------|----------------------------------------------------------------------------------------------------------------------------------------------------------------------------------------------------------------------------------------------------------------------------------------------------------------------------------------------------------------------------------------------------------------------------------------------------------------------------------------------------------------------------------------------------|---|----------------------|-----------------------------------------------------|----------------------|--------------|-------------------------------|---|---------------------------------------------------|---------------------------------------------------------------------------------|--------------------|--------------|---------------------------------|----|---------------|-------|----|---------------|------|
| 41                                          | [time_tohosp_adm]                                                      | Section Header: <i>Admission Details</i><br>How long did it take you to travel to this hospital?  | dropdown<br><table border="1"> <tr><td>1</td><td>less than 30 minutes</td></tr> <tr><td>2</td><td>30 minutes - 1 hr</td></tr> <tr><td>3</td><td>more than 1hrs and up to 2hrs</td></tr> <tr><td>4</td><td>more than 2hrs and less than 4hrs</td></tr> <tr><td>5</td><td>4 hours or more</td></tr> </table>                                                                                                                                                                                                                                         | 1 | less than 30 minutes | 2                                                   | 30 minutes - 1 hr    | 3            | more than 1hrs and up to 2hrs | 4 | more than 2hrs and less than 4hrs                 | 5                                                                               | 4 hours or more    |              |                                 |    |               |       |    |               |      |
| 1                                           | less than 30 minutes                                                   |                                                                                                   |                                                                                                                                                                                                                                                                                                                                                                                                                                                                                                                                                    |   |                      |                                                     |                      |              |                               |   |                                                   |                                                                                 |                    |              |                                 |    |               |       |    |               |      |
| 2                                           | 30 minutes - 1 hr                                                      |                                                                                                   |                                                                                                                                                                                                                                                                                                                                                                                                                                                                                                                                                    |   |                      |                                                     |                      |              |                               |   |                                                   |                                                                                 |                    |              |                                 |    |               |       |    |               |      |
| 3                                           | more than 1hrs and up to 2hrs                                          |                                                                                                   |                                                                                                                                                                                                                                                                                                                                                                                                                                                                                                                                                    |   |                      |                                                     |                      |              |                               |   |                                                   |                                                                                 |                    |              |                                 |    |               |       |    |               |      |
| 4                                           | more than 2hrs and less than 4hrs                                      |                                                                                                   |                                                                                                                                                                                                                                                                                                                                                                                                                                                                                                                                                    |   |                      |                                                     |                      |              |                               |   |                                                   |                                                                                 |                    |              |                                 |    |               |       |    |               |      |
| 5                                           | 4 hours or more                                                        |                                                                                                   |                                                                                                                                                                                                                                                                                                                                                                                                                                                                                                                                                    |   |                      |                                                     |                      |              |                               |   |                                                   |                                                                                 |                    |              |                                 |    |               |       |    |               |      |
| 42                                          | [transport_adm]                                                        | Primary mode of transportation to the hospital?                                                   | dropdown<br><table border="1"> <tr><td>1</td><td>Walk</td></tr> <tr><td>2</td><td>Motorcycle</td></tr> <tr><td>3</td><td>Public transport (bus, taxi)</td></tr> <tr><td>4</td><td>Private transport (special hire, private vehicle)</td></tr> <tr><td>5</td><td>Ambulance</td></tr> <tr><td>98</td><td>Other</td></tr> </table>                                                                                                                                                                                                                    | 1 | Walk                 | 2                                                   | Motorcycle           | 3            | Public transport (bus, taxi)  | 4 | Private transport (special hire, private vehicle) | 5                                                                               | Ambulance          | 98           | Other                           |    |               |       |    |               |      |
| 1                                           | Walk                                                                   |                                                                                                   |                                                                                                                                                                                                                                                                                                                                                                                                                                                                                                                                                    |   |                      |                                                     |                      |              |                               |   |                                                   |                                                                                 |                    |              |                                 |    |               |       |    |               |      |
| 2                                           | Motorcycle                                                             |                                                                                                   |                                                                                                                                                                                                                                                                                                                                                                                                                                                                                                                                                    |   |                      |                                                     |                      |              |                               |   |                                                   |                                                                                 |                    |              |                                 |    |               |       |    |               |      |
| 3                                           | Public transport (bus, taxi)                                           |                                                                                                   |                                                                                                                                                                                                                                                                                                                                                                                                                                                                                                                                                    |   |                      |                                                     |                      |              |                               |   |                                                   |                                                                                 |                    |              |                                 |    |               |       |    |               |      |
| 4                                           | Private transport (special hire, private vehicle)                      |                                                                                                   |                                                                                                                                                                                                                                                                                                                                                                                                                                                                                                                                                    |   |                      |                                                     |                      |              |                               |   |                                                   |                                                                                 |                    |              |                                 |    |               |       |    |               |      |
| 5                                           | Ambulance                                                              |                                                                                                   |                                                                                                                                                                                                                                                                                                                                                                                                                                                                                                                                                    |   |                      |                                                     |                      |              |                               |   |                                                   |                                                                                 |                    |              |                                 |    |               |       |    |               |      |
| 98                                          | Other                                                                  |                                                                                                   |                                                                                                                                                                                                                                                                                                                                                                                                                                                                                                                                                    |   |                      |                                                     |                      |              |                               |   |                                                   |                                                                                 |                    |              |                                 |    |               |       |    |               |      |
| 43                                          | [delay_adm]                                                            | Were you delayed >1 hour by any of the following (choose all that apply):                         | checkbox<br><table border="1"> <tr><td>1</td><td>delay_adm__1</td><td>Terrain (swamp, flood, water transport delay, etc.)</td></tr> <tr><td>2</td><td>delay_adm__2</td><td>Cost of transport</td></tr> <tr><td>3</td><td>delay_adm__3</td><td>General transport delay (waiting for the bus, schedules, travel at night, etc.)</td></tr> <tr><td>4</td><td>delay_adm__4</td><td>Significant rain/threat of rain</td></tr> <tr><td>98</td><td>delay_adm__98</td><td>Other</td></tr> <tr><td>99</td><td>delay_adm__99</td><td>None</td></tr> </table> | 1 | delay_adm__1         | Terrain (swamp, flood, water transport delay, etc.) | 2                    | delay_adm__2 | Cost of transport             | 3 | delay_adm__3                                      | General transport delay (waiting for the bus, schedules, travel at night, etc.) | 4                  | delay_adm__4 | Significant rain/threat of rain | 98 | delay_adm__98 | Other | 99 | delay_adm__99 | None |
| 1                                           | delay_adm__1                                                           | Terrain (swamp, flood, water transport delay, etc.)                                               |                                                                                                                                                                                                                                                                                                                                                                                                                                                                                                                                                    |   |                      |                                                     |                      |              |                               |   |                                                   |                                                                                 |                    |              |                                 |    |               |       |    |               |      |
| 2                                           | delay_adm__2                                                           | Cost of transport                                                                                 |                                                                                                                                                                                                                                                                                                                                                                                                                                                                                                                                                    |   |                      |                                                     |                      |              |                               |   |                                                   |                                                                                 |                    |              |                                 |    |               |       |    |               |      |
| 3                                           | delay_adm__3                                                           | General transport delay (waiting for the bus, schedules, travel at night, etc.)                   |                                                                                                                                                                                                                                                                                                                                                                                                                                                                                                                                                    |   |                      |                                                     |                      |              |                               |   |                                                   |                                                                                 |                    |              |                                 |    |               |       |    |               |      |
| 4                                           | delay_adm__4                                                           | Significant rain/threat of rain                                                                   |                                                                                                                                                                                                                                                                                                                                                                                                                                                                                                                                                    |   |                      |                                                     |                      |              |                               |   |                                                   |                                                                                 |                    |              |                                 |    |               |       |    |               |      |
| 98                                          | delay_adm__98                                                          | Other                                                                                             |                                                                                                                                                                                                                                                                                                                                                                                                                                                                                                                                                    |   |                      |                                                     |                      |              |                               |   |                                                   |                                                                                 |                    |              |                                 |    |               |       |    |               |      |
| 99                                          | delay_adm__99                                                          | None                                                                                              |                                                                                                                                                                                                                                                                                                                                                                                                                                                                                                                                                    |   |                      |                                                     |                      |              |                               |   |                                                   |                                                                                 |                    |              |                                 |    |               |       |    |               |      |
| 44                                          | [isreferral_adm]                                                       | Is this visit a referral?                                                                         | yesno<br><table border="1"> <tr><td>1</td><td>Yes</td></tr> <tr><td>0</td><td>No</td></tr> </table>                                                                                                                                                                                                                                                                                                                                                                                                                                                | 1 | Yes                  | 0                                                   | No                   |              |                               |   |                                                   |                                                                                 |                    |              |                                 |    |               |       |    |               |      |
| 1                                           | Yes                                                                    |                                                                                                   |                                                                                                                                                                                                                                                                                                                                                                                                                                                                                                                                                    |   |                      |                                                     |                      |              |                               |   |                                                   |                                                                                 |                    |              |                                 |    |               |       |    |               |      |
| 0                                           | No                                                                     |                                                                                                   |                                                                                                                                                                                                                                                                                                                                                                                                                                                                                                                                                    |   |                      |                                                     |                      |              |                               |   |                                                   |                                                                                 |                    |              |                                 |    |               |       |    |               |      |
| 45                                          | [referralsrc_adm]<br>Show the field ONLY if:<br>[isreferral_adm] = '1' | Referral source                                                                                   | dropdown<br><table border="1"> <tr><td>1</td><td>Other Hospital</td></tr> <tr><td>2</td><td>Health Centre/Clinic</td></tr> <tr><td>3</td><td>VHT</td></tr> <tr><td>4</td><td>Untrained Health Worker</td></tr> <tr><td>5</td><td>Traditional Healer</td></tr> <tr><td>6</td><td>Traditional Birth Attendant</td></tr> <tr><td>98</td><td>Other</td></tr> </table>                                                                                                                                                                                  | 1 | Other Hospital       | 2                                                   | Health Centre/Clinic | 3            | VHT                           | 4 | Untrained Health Worker                           | 5                                                                               | Traditional Healer | 6            | Traditional Birth Attendant     | 98 | Other         |       |    |               |      |
| 1                                           | Other Hospital                                                         |                                                                                                   |                                                                                                                                                                                                                                                                                                                                                                                                                                                                                                                                                    |   |                      |                                                     |                      |              |                               |   |                                                   |                                                                                 |                    |              |                                 |    |               |       |    |               |      |
| 2                                           | Health Centre/Clinic                                                   |                                                                                                   |                                                                                                                                                                                                                                                                                                                                                                                                                                                                                                                                                    |   |                      |                                                     |                      |              |                               |   |                                                   |                                                                                 |                    |              |                                 |    |               |       |    |               |      |
| 3                                           | VHT                                                                    |                                                                                                   |                                                                                                                                                                                                                                                                                                                                                                                                                                                                                                                                                    |   |                      |                                                     |                      |              |                               |   |                                                   |                                                                                 |                    |              |                                 |    |               |       |    |               |      |
| 4                                           | Untrained Health Worker                                                |                                                                                                   |                                                                                                                                                                                                                                                                                                                                                                                                                                                                                                                                                    |   |                      |                                                     |                      |              |                               |   |                                                   |                                                                                 |                    |              |                                 |    |               |       |    |               |      |
| 5                                           | Traditional Healer                                                     |                                                                                                   |                                                                                                                                                                                                                                                                                                                                                                                                                                                                                                                                                    |   |                      |                                                     |                      |              |                               |   |                                                   |                                                                                 |                    |              |                                 |    |               |       |    |               |      |
| 6                                           | Traditional Birth Attendant                                            |                                                                                                   |                                                                                                                                                                                                                                                                                                                                                                                                                                                                                                                                                    |   |                      |                                                     |                      |              |                               |   |                                                   |                                                                                 |                    |              |                                 |    |               |       |    |               |      |
| 98                                          | Other                                                                  |                                                                                                   |                                                                                                                                                                                                                                                                                                                                                                                                                                                                                                                                                    |   |                      |                                                     |                      |              |                               |   |                                                   |                                                                                 |                    |              |                                 |    |               |       |    |               |      |
| 46                                          | [csection_adm]                                                         | Section Header: <i>Admission clinical variables</i><br>Is the mother here for elective c-section? | yesno<br><table border="1"> <tr><td>1</td><td>Yes</td></tr> <tr><td>0</td><td>No</td></tr> </table>                                                                                                                                                                                                                                                                                                                                                                                                                                                | 1 | Yes                  | 0                                                   | No                   |              |                               |   |                                                   |                                                                                 |                    |              |                                 |    |               |       |    |               |      |
| 1                                           | Yes                                                                    |                                                                                                   |                                                                                                                                                                                                                                                                                                                                                                                                                                                                                                                                                    |   |                      |                                                     |                      |              |                               |   |                                                   |                                                                                 |                    |              |                                 |    |               |       |    |               |      |
| 0                                           | No                                                                     |                                                                                                   |                                                                                                                                                                                                                                                                                                                                                                                                                                                                                                                                                    |   |                      |                                                     |                      |              |                               |   |                                                   |                                                                                 |                    |              |                                 |    |               |       |    |               |      |
| 47                                          | [labordate_adm]<br>Show the field ONLY if:<br>[csection_adm] != '1'    | Date labor started:                                                                               | text (date_dmy)                                                                                                                                                                                                                                                                                                                                                                                                                                                                                                                                    |   |                      |                                                     |                      |              |                               |   |                                                   |                                                                                 |                    |              |                                 |    |               |       |    |               |      |
| 48                                          | [labortime_adm]<br>Show the field ONLY if:<br>[csection_adm] != '1'    | Time labor started:                                                                               | text (time)                                                                                                                                                                                                                                                                                                                                                                                                                                                                                                                                        |   |                      |                                                     |                      |              |                               |   |                                                   |                                                                                 |                    |              |                                 |    |               |       |    |               |      |
| 49                                          | [takevitals_adm]                                                       | Record BP, Temperature, and HR?                                                                   | yesno<br><table border="1"> <tr><td>1</td><td>Yes</td></tr> <tr><td>0</td><td>No</td></tr> </table>                                                                                                                                                                                                                                                                                                                                                                                                                                                | 1 | Yes                  | 0                                                   | No                   |              |                               |   |                                                   |                                                                                 |                    |              |                                 |    |               |       |    |               |      |
| 1                                           | Yes                                                                    |                                                                                                   |                                                                                                                                                                                                                                                                                                                                                                                                                                                                                                                                                    |   |                      |                                                     |                      |              |                               |   |                                                   |                                                                                 |                    |              |                                 |    |               |       |    |               |      |
| 0                                           | No                                                                     |                                                                                                   |                                                                                                                                                                                                                                                                                                                                                                                                                                                                                                                                                    |   |                      |                                                     |                      |              |                               |   |                                                   |                                                                                 |                    |              |                                 |    |               |       |    |               |      |

|                                                             |                                                                   |                                                                                                                    |                                                                                                                                                                                                                                                                                                                                                                                                                                                                                                                                                                                                                                                                                                                                                                                                                                                                                                                                        |   |              |                                  |            |              |                                                  |   |              |                                                                      |   |              |                                       |   |              |                |   |              |             |   |              |               |   |              |              |   |              |                        |    |               |                                 |    |               |                    |
|-------------------------------------------------------------|-------------------------------------------------------------------|--------------------------------------------------------------------------------------------------------------------|----------------------------------------------------------------------------------------------------------------------------------------------------------------------------------------------------------------------------------------------------------------------------------------------------------------------------------------------------------------------------------------------------------------------------------------------------------------------------------------------------------------------------------------------------------------------------------------------------------------------------------------------------------------------------------------------------------------------------------------------------------------------------------------------------------------------------------------------------------------------------------------------------------------------------------------|---|--------------|----------------------------------|------------|--------------|--------------------------------------------------|---|--------------|----------------------------------------------------------------------|---|--------------|---------------------------------------|---|--------------|----------------|---|--------------|-------------|---|--------------|---------------|---|--------------|--------------|---|--------------|------------------------|----|---------------|---------------------------------|----|---------------|--------------------|
| 50                                                          | [sys_bp_adm]<br>Show the field ONLY if:<br>[takevitals_adm] = '1' | Systolic blood pressure at admission                                                                               | text (integer)                                                                                                                                                                                                                                                                                                                                                                                                                                                                                                                                                                                                                                                                                                                                                                                                                                                                                                                         |   |              |                                  |            |              |                                                  |   |              |                                                                      |   |              |                                       |   |              |                |   |              |             |   |              |               |   |              |              |   |              |                        |    |               |                                 |    |               |                    |
| 51                                                          | [dia_bp_adm]<br>Show the field ONLY if:<br>[takevitals_adm] = '1' | Diastolic blood pressure at admission                                                                              | text (integer)                                                                                                                                                                                                                                                                                                                                                                                                                                                                                                                                                                                                                                                                                                                                                                                                                                                                                                                         |   |              |                                  |            |              |                                                  |   |              |                                                                      |   |              |                                       |   |              |                |   |              |             |   |              |               |   |              |              |   |              |                        |    |               |                                 |    |               |                    |
| 52                                                          | [temp_adm]<br>Show the field ONLY if:<br>[takevitals_adm] = '1'   | Temperature at admission                                                                                           | text (number_1dp, Min: 35, Max: 42)                                                                                                                                                                                                                                                                                                                                                                                                                                                                                                                                                                                                                                                                                                                                                                                                                                                                                                    |   |              |                                  |            |              |                                                  |   |              |                                                                      |   |              |                                       |   |              |                |   |              |             |   |              |               |   |              |              |   |              |                        |    |               |                                 |    |               |                    |
| 53                                                          | [hr_adm]<br>Show the field ONLY if:<br>[takevitals_adm] = '1'     | Heart rate at admission                                                                                            | text (integer)                                                                                                                                                                                                                                                                                                                                                                                                                                                                                                                                                                                                                                                                                                                                                                                                                                                                                                                         |   |              |                                  |            |              |                                                  |   |              |                                                                      |   |              |                                       |   |              |                |   |              |             |   |              |               |   |              |              |   |              |                        |    |               |                                 |    |               |                    |
| 54                                                          | [distress_adm]                                                    | Was the woman in distress upon arrival?                                                                            | dropdown<br><table border="1"> <tr><td>1</td><td>Yes</td></tr> <tr><td>2</td><td>No</td></tr> <tr><td>3</td><td>Unsure</td></tr> </table>                                                                                                                                                                                                                                                                                                                                                                                                                                                                                                                                                                                                                                                                                                                                                                                              | 1 | Yes          | 2                                | No         | 3            | Unsure                                           |   |              |                                                                      |   |              |                                       |   |              |                |   |              |             |   |              |               |   |              |              |   |              |                        |    |               |                                 |    |               |                    |
| 1                                                           | Yes                                                               |                                                                                                                    |                                                                                                                                                                                                                                                                                                                                                                                                                                                                                                                                                                                                                                                                                                                                                                                                                                                                                                                                        |   |              |                                  |            |              |                                                  |   |              |                                                                      |   |              |                                       |   |              |                |   |              |             |   |              |               |   |              |              |   |              |                        |    |               |                                 |    |               |                    |
| 2                                                           | No                                                                |                                                                                                                    |                                                                                                                                                                                                                                                                                                                                                                                                                                                                                                                                                                                                                                                                                                                                                                                                                                                                                                                                        |   |              |                                  |            |              |                                                  |   |              |                                                                      |   |              |                                       |   |              |                |   |              |             |   |              |               |   |              |              |   |              |                        |    |               |                                 |    |               |                    |
| 3                                                           | Unsure                                                            |                                                                                                                    |                                                                                                                                                                                                                                                                                                                                                                                                                                                                                                                                                                                                                                                                                                                                                                                                                                                                                                                                        |   |              |                                  |            |              |                                                  |   |              |                                                                      |   |              |                                       |   |              |                |   |              |             |   |              |               |   |              |              |   |              |                        |    |               |                                 |    |               |                    |
| 55                                                          | [admission_complete]                                              | Section Header: <i>Form Status</i><br>Complete?                                                                    | dropdown<br><table border="1"> <tr><td>0</td><td>Incomplete</td></tr> <tr><td>1</td><td>Unverified</td></tr> <tr><td>2</td><td>Complete</td></tr> </table>                                                                                                                                                                                                                                                                                                                                                                                                                                                                                                                                                                                                                                                                                                                                                                             | 0 | Incomplete   | 1                                | Unverified | 2            | Complete                                         |   |              |                                                                      |   |              |                                       |   |              |                |   |              |             |   |              |               |   |              |              |   |              |                        |    |               |                                 |    |               |                    |
| 0                                                           | Incomplete                                                        |                                                                                                                    |                                                                                                                                                                                                                                                                                                                                                                                                                                                                                                                                                                                                                                                                                                                                                                                                                                                                                                                                        |   |              |                                  |            |              |                                                  |   |              |                                                                      |   |              |                                       |   |              |                |   |              |             |   |              |               |   |              |              |   |              |                        |    |               |                                 |    |               |                    |
| 1                                                           | Unverified                                                        |                                                                                                                    |                                                                                                                                                                                                                                                                                                                                                                                                                                                                                                                                                                                                                                                                                                                                                                                                                                                                                                                                        |   |              |                                  |            |              |                                                  |   |              |                                                                      |   |              |                                       |   |              |                |   |              |             |   |              |               |   |              |              |   |              |                        |    |               |                                 |    |               |                    |
| 2                                                           | Complete                                                          |                                                                                                                    |                                                                                                                                                                                                                                                                                                                                                                                                                                                                                                                                                                                                                                                                                                                                                                                                                                                                                                                                        |   |              |                                  |            |              |                                                  |   |              |                                                                      |   |              |                                       |   |              |                |   |              |             |   |              |               |   |              |              |   |              |                        |    |               |                                 |    |               |                    |
| Instrument: <b>3. Pregnancy History</b> (pregnancy_history) |                                                                   |                                                                                                                    |                                                                                                                                                                                                                                                                                                                                                                                                                                                                                                                                                                                                                                                                                                                                                                                                                                                                                                                                        |   |              |                                  |            |              |                                                  |   |              |                                                                      |   |              |                                       |   |              |                |   |              |             |   |              |               |   |              |              |   |              |                        |    |               |                                 |    |               |                    |
| 56                                                          | [medhx_adm]                                                       | Has the women been diagnosed with ANY of the following conditions BEFORE pregnancy (choose all that apply)         | checkbox<br><table border="1"> <tr><td>1</td><td>medhx_adm__1</td><td>HIV (diagnosed BEFORE pregnancy)</td></tr> <tr><td>2</td><td>medhx_adm__2</td><td>High blood pressure (diagnosed BEFORE pregnancy)</td></tr> <tr><td>3</td><td>medhx_adm__3</td><td>Prior infertility (&gt;1yr attempting to get pregnant but unsuccessful)</td></tr> <tr><td>4</td><td>medhx_adm__4</td><td>Diabetes (diagnosed BEFORE pregnancy)</td></tr> <tr><td>5</td><td>medhx_adm__5</td><td>Kidney disease</td></tr> <tr><td>6</td><td>medhx_adm__6</td><td>Sickle cell</td></tr> <tr><td>7</td><td>medhx_adm__7</td><td>Hepatitis B/C</td></tr> <tr><td>8</td><td>medhx_adm__8</td><td>Tuberculosis</td></tr> <tr><td>9</td><td>medhx_adm__9</td><td>Chronic mental illness</td></tr> <tr><td>98</td><td>medhx_adm__98</td><td>Other diagnoses not listed here</td></tr> <tr><td>99</td><td>medhx_adm__99</td><td>No prior diagnoses</td></tr> </table> | 1 | medhx_adm__1 | HIV (diagnosed BEFORE pregnancy) | 2          | medhx_adm__2 | High blood pressure (diagnosed BEFORE pregnancy) | 3 | medhx_adm__3 | Prior infertility (>1yr attempting to get pregnant but unsuccessful) | 4 | medhx_adm__4 | Diabetes (diagnosed BEFORE pregnancy) | 5 | medhx_adm__5 | Kidney disease | 6 | medhx_adm__6 | Sickle cell | 7 | medhx_adm__7 | Hepatitis B/C | 8 | medhx_adm__8 | Tuberculosis | 9 | medhx_adm__9 | Chronic mental illness | 98 | medhx_adm__98 | Other diagnoses not listed here | 99 | medhx_adm__99 | No prior diagnoses |
| 1                                                           | medhx_adm__1                                                      | HIV (diagnosed BEFORE pregnancy)                                                                                   |                                                                                                                                                                                                                                                                                                                                                                                                                                                                                                                                                                                                                                                                                                                                                                                                                                                                                                                                        |   |              |                                  |            |              |                                                  |   |              |                                                                      |   |              |                                       |   |              |                |   |              |             |   |              |               |   |              |              |   |              |                        |    |               |                                 |    |               |                    |
| 2                                                           | medhx_adm__2                                                      | High blood pressure (diagnosed BEFORE pregnancy)                                                                   |                                                                                                                                                                                                                                                                                                                                                                                                                                                                                                                                                                                                                                                                                                                                                                                                                                                                                                                                        |   |              |                                  |            |              |                                                  |   |              |                                                                      |   |              |                                       |   |              |                |   |              |             |   |              |               |   |              |              |   |              |                        |    |               |                                 |    |               |                    |
| 3                                                           | medhx_adm__3                                                      | Prior infertility (>1yr attempting to get pregnant but unsuccessful)                                               |                                                                                                                                                                                                                                                                                                                                                                                                                                                                                                                                                                                                                                                                                                                                                                                                                                                                                                                                        |   |              |                                  |            |              |                                                  |   |              |                                                                      |   |              |                                       |   |              |                |   |              |             |   |              |               |   |              |              |   |              |                        |    |               |                                 |    |               |                    |
| 4                                                           | medhx_adm__4                                                      | Diabetes (diagnosed BEFORE pregnancy)                                                                              |                                                                                                                                                                                                                                                                                                                                                                                                                                                                                                                                                                                                                                                                                                                                                                                                                                                                                                                                        |   |              |                                  |            |              |                                                  |   |              |                                                                      |   |              |                                       |   |              |                |   |              |             |   |              |               |   |              |              |   |              |                        |    |               |                                 |    |               |                    |
| 5                                                           | medhx_adm__5                                                      | Kidney disease                                                                                                     |                                                                                                                                                                                                                                                                                                                                                                                                                                                                                                                                                                                                                                                                                                                                                                                                                                                                                                                                        |   |              |                                  |            |              |                                                  |   |              |                                                                      |   |              |                                       |   |              |                |   |              |             |   |              |               |   |              |              |   |              |                        |    |               |                                 |    |               |                    |
| 6                                                           | medhx_adm__6                                                      | Sickle cell                                                                                                        |                                                                                                                                                                                                                                                                                                                                                                                                                                                                                                                                                                                                                                                                                                                                                                                                                                                                                                                                        |   |              |                                  |            |              |                                                  |   |              |                                                                      |   |              |                                       |   |              |                |   |              |             |   |              |               |   |              |              |   |              |                        |    |               |                                 |    |               |                    |
| 7                                                           | medhx_adm__7                                                      | Hepatitis B/C                                                                                                      |                                                                                                                                                                                                                                                                                                                                                                                                                                                                                                                                                                                                                                                                                                                                                                                                                                                                                                                                        |   |              |                                  |            |              |                                                  |   |              |                                                                      |   |              |                                       |   |              |                |   |              |             |   |              |               |   |              |              |   |              |                        |    |               |                                 |    |               |                    |
| 8                                                           | medhx_adm__8                                                      | Tuberculosis                                                                                                       |                                                                                                                                                                                                                                                                                                                                                                                                                                                                                                                                                                                                                                                                                                                                                                                                                                                                                                                                        |   |              |                                  |            |              |                                                  |   |              |                                                                      |   |              |                                       |   |              |                |   |              |             |   |              |               |   |              |              |   |              |                        |    |               |                                 |    |               |                    |
| 9                                                           | medhx_adm__9                                                      | Chronic mental illness                                                                                             |                                                                                                                                                                                                                                                                                                                                                                                                                                                                                                                                                                                                                                                                                                                                                                                                                                                                                                                                        |   |              |                                  |            |              |                                                  |   |              |                                                                      |   |              |                                       |   |              |                |   |              |             |   |              |               |   |              |              |   |              |                        |    |               |                                 |    |               |                    |
| 98                                                          | medhx_adm__98                                                     | Other diagnoses not listed here                                                                                    |                                                                                                                                                                                                                                                                                                                                                                                                                                                                                                                                                                                                                                                                                                                                                                                                                                                                                                                                        |   |              |                                  |            |              |                                                  |   |              |                                                                      |   |              |                                       |   |              |                |   |              |             |   |              |               |   |              |              |   |              |                        |    |               |                                 |    |               |                    |
| 99                                                          | medhx_adm__99                                                     | No prior diagnoses                                                                                                 |                                                                                                                                                                                                                                                                                                                                                                                                                                                                                                                                                                                                                                                                                                                                                                                                                                                                                                                                        |   |              |                                  |            |              |                                                  |   |              |                                                                      |   |              |                                       |   |              |                |   |              |             |   |              |               |   |              |              |   |              |                        |    |               |                                 |    |               |                    |
| 57                                                          | [duedate_adm]                                                     | Does the woman know her approximate due date?                                                                      | yesno<br><table border="1"> <tr><td>1</td><td>Yes</td></tr> <tr><td>0</td><td>No</td></tr> </table>                                                                                                                                                                                                                                                                                                                                                                                                                                                                                                                                                                                                                                                                                                                                                                                                                                    | 1 | Yes          | 0                                | No         |              |                                                  |   |              |                                                                      |   |              |                                       |   |              |                |   |              |             |   |              |               |   |              |              |   |              |                        |    |               |                                 |    |               |                    |
| 1                                                           | Yes                                                               |                                                                                                                    |                                                                                                                                                                                                                                                                                                                                                                                                                                                                                                                                                                                                                                                                                                                                                                                                                                                                                                                                        |   |              |                                  |            |              |                                                  |   |              |                                                                      |   |              |                                       |   |              |                |   |              |             |   |              |               |   |              |              |   |              |                        |    |               |                                 |    |               |                    |
| 0                                                           | No                                                                |                                                                                                                    |                                                                                                                                                                                                                                                                                                                                                                                                                                                                                                                                                                                                                                                                                                                                                                                                                                                                                                                                        |   |              |                                  |            |              |                                                  |   |              |                                                                      |   |              |                                       |   |              |                |   |              |             |   |              |               |   |              |              |   |              |                        |    |               |                                 |    |               |                    |
| 58                                                          | [duedate3_adm]<br>Show the field ONLY if:<br>[duedate_adm] = '1'  | Due date (if known)                                                                                                | text (date_dmy)                                                                                                                                                                                                                                                                                                                                                                                                                                                                                                                                                                                                                                                                                                                                                                                                                                                                                                                        |   |              |                                  |            |              |                                                  |   |              |                                                                      |   |              |                                       |   |              |                |   |              |             |   |              |               |   |              |              |   |              |                        |    |               |                                 |    |               |                    |
| 59                                                          | [duedate2_adm]<br>Show the field ONLY if:<br>[duedate_adm] = '1'  | How was the due date defined?                                                                                      | dropdown<br><table border="1"> <tr><td>1</td><td>LNMP</td></tr> <tr><td>2</td><td>Ultrasound</td></tr> <tr><td>3</td><td>Woman herself</td></tr> </table>                                                                                                                                                                                                                                                                                                                                                                                                                                                                                                                                                                                                                                                                                                                                                                              | 1 | LNMP         | 2                                | Ultrasound | 3            | Woman herself                                    |   |              |                                                                      |   |              |                                       |   |              |                |   |              |             |   |              |               |   |              |              |   |              |                        |    |               |                                 |    |               |                    |
| 1                                                           | LNMP                                                              |                                                                                                                    |                                                                                                                                                                                                                                                                                                                                                                                                                                                                                                                                                                                                                                                                                                                                                                                                                                                                                                                                        |   |              |                                  |            |              |                                                  |   |              |                                                                      |   |              |                                       |   |              |                |   |              |             |   |              |               |   |              |              |   |              |                        |    |               |                                 |    |               |                    |
| 2                                                           | Ultrasound                                                        |                                                                                                                    |                                                                                                                                                                                                                                                                                                                                                                                                                                                                                                                                                                                                                                                                                                                                                                                                                                                                                                                                        |   |              |                                  |            |              |                                                  |   |              |                                                                      |   |              |                                       |   |              |                |   |              |             |   |              |               |   |              |              |   |              |                        |    |               |                                 |    |               |                    |
| 3                                                           | Woman herself                                                     |                                                                                                                    |                                                                                                                                                                                                                                                                                                                                                                                                                                                                                                                                                                                                                                                                                                                                                                                                                                                                                                                                        |   |              |                                  |            |              |                                                  |   |              |                                                                      |   |              |                                       |   |              |                |   |              |             |   |              |               |   |              |              |   |              |                        |    |               |                                 |    |               |                    |
| 60                                                          | [gravid_adm]                                                      | Section Header: <i>Pregnancy History</i><br>How many pregnancies has she had in her lifetime (including this one)? | text (integer, Min: 1, Max: 20)                                                                                                                                                                                                                                                                                                                                                                                                                                                                                                                                                                                                                                                                                                                                                                                                                                                                                                        |   |              |                                  |            |              |                                                  |   |              |                                                                      |   |              |                                       |   |              |                |   |              |             |   |              |               |   |              |              |   |              |                        |    |               |                                 |    |               |                    |

|    |                                                                            |                                                                                                                  |                                                                                                                                                                                                                                                                                                                                                                                                                                                                                                                                                                                                                                                                                                                                                                                                                                                                                                                                                                                                                                                                                                                                                                                                                                                                                                                                                                                                                                                                                                                                                                                                                                                        |   |                 |                      |                  |                 |                          |    |                  |                      |    |                  |                          |    |                  |                                                            |   |               |                                                            |   |               |                                                            |   |               |       |   |               |                |    |                |         |    |                |                        |    |                |                         |    |                |              |    |                |        |    |                |                      |    |                |                          |    |                |               |    |                |                       |    |                |                 |    |                |      |
|----|----------------------------------------------------------------------------|------------------------------------------------------------------------------------------------------------------|--------------------------------------------------------------------------------------------------------------------------------------------------------------------------------------------------------------------------------------------------------------------------------------------------------------------------------------------------------------------------------------------------------------------------------------------------------------------------------------------------------------------------------------------------------------------------------------------------------------------------------------------------------------------------------------------------------------------------------------------------------------------------------------------------------------------------------------------------------------------------------------------------------------------------------------------------------------------------------------------------------------------------------------------------------------------------------------------------------------------------------------------------------------------------------------------------------------------------------------------------------------------------------------------------------------------------------------------------------------------------------------------------------------------------------------------------------------------------------------------------------------------------------------------------------------------------------------------------------------------------------------------------------|---|-----------------|----------------------|------------------|-----------------|--------------------------|----|------------------|----------------------|----|------------------|--------------------------|----|------------------|------------------------------------------------------------|---|---------------|------------------------------------------------------------|---|---------------|------------------------------------------------------------|---|---------------|-------|---|---------------|----------------|----|----------------|---------|----|----------------|------------------------|----|----------------|-------------------------|----|----------------|--------------|----|----------------|--------|----|----------------|----------------------|----|----------------|--------------------------|----|----------------|---------------|----|----------------|-----------------------|----|----------------|-----------------|----|----------------|------|
| 61 | [parity_adm]                                                               | How many pregnancies has she had with a baby born greater than 500g at birth delivered after 20 weeks gestation? | text (integer, Min: 0, Max: 20)                                                                                                                                                                                                                                                                                                                                                                                                                                                                                                                                                                                                                                                                                                                                                                                                                                                                                                                                                                                                                                                                                                                                                                                                                                                                                                                                                                                                                                                                                                                                                                                                                        |   |                 |                      |                  |                 |                          |    |                  |                      |    |                  |                          |    |                  |                                                            |   |               |                                                            |   |               |                                                            |   |               |       |   |               |                |    |                |         |    |                |                        |    |                |                         |    |                |              |    |                |        |    |                |                      |    |                |                          |    |                |               |    |                |                       |    |                |                 |    |                |      |
| 62 | [csect_adm]                                                                | Has woman had a prior c-section?                                                                                 | yesno<br><table border="1"> <tr> <td>1</td> <td>Yes</td> </tr> <tr> <td>0</td> <td>No</td> </tr> </table>                                                                                                                                                                                                                                                                                                                                                                                                                                                                                                                                                                                                                                                                                                                                                                                                                                                                                                                                                                                                                                                                                                                                                                                                                                                                                                                                                                                                                                                                                                                                              | 1 | Yes             | 0                    | No               |                 |                          |    |                  |                      |    |                  |                          |    |                  |                                                            |   |               |                                                            |   |               |                                                            |   |               |       |   |               |                |    |                |         |    |                |                        |    |                |                         |    |                |              |    |                |        |    |                |                      |    |                |                          |    |                |               |    |                |                       |    |                |                 |    |                |      |
| 1  | Yes                                                                        |                                                                                                                  |                                                                                                                                                                                                                                                                                                                                                                                                                                                                                                                                                                                                                                                                                                                                                                                                                                                                                                                                                                                                                                                                                                                                                                                                                                                                                                                                                                                                                                                                                                                                                                                                                                                        |   |                 |                      |                  |                 |                          |    |                  |                      |    |                  |                          |    |                  |                                                            |   |               |                                                            |   |               |                                                            |   |               |       |   |               |                |    |                |         |    |                |                        |    |                |                         |    |                |              |    |                |        |    |                |                      |    |                |                          |    |                |               |    |                |                       |    |                |                 |    |                |      |
| 0  | No                                                                         |                                                                                                                  |                                                                                                                                                                                                                                                                                                                                                                                                                                                                                                                                                                                                                                                                                                                                                                                                                                                                                                                                                                                                                                                                                                                                                                                                                                                                                                                                                                                                                                                                                                                                                                                                                                                        |   |                 |                      |                  |                 |                          |    |                  |                      |    |                  |                          |    |                  |                                                            |   |               |                                                            |   |               |                                                            |   |               |       |   |               |                |    |                |         |    |                |                        |    |                |                         |    |                |              |    |                |        |    |                |                      |    |                |                          |    |                |               |    |                |                       |    |                |                 |    |                |      |
| 63 | [csect2_adm]<br>Show the field ONLY if:<br>[csect_adm] = '1'               | How long ago was most recent c-section?                                                                          | dropdown<br><table border="1"> <tr> <td>1</td> <td>&lt; 18 months ago</td> </tr> <tr> <td>2</td> <td>18-36 months ago</td> </tr> <tr> <td>3</td> <td>&gt;36 months ago</td> </tr> </table>                                                                                                                                                                                                                                                                                                                                                                                                                                                                                                                                                                                                                                                                                                                                                                                                                                                                                                                                                                                                                                                                                                                                                                                                                                                                                                                                                                                                                                                             | 1 | < 18 months ago | 2                    | 18-36 months ago | 3               | >36 months ago           |    |                  |                      |    |                  |                          |    |                  |                                                            |   |               |                                                            |   |               |                                                            |   |               |       |   |               |                |    |                |         |    |                |                        |    |                |                         |    |                |              |    |                |        |    |                |                      |    |                |                          |    |                |               |    |                |                       |    |                |                 |    |                |      |
| 1  | < 18 months ago                                                            |                                                                                                                  |                                                                                                                                                                                                                                                                                                                                                                                                                                                                                                                                                                                                                                                                                                                                                                                                                                                                                                                                                                                                                                                                                                                                                                                                                                                                                                                                                                                                                                                                                                                                                                                                                                                        |   |                 |                      |                  |                 |                          |    |                  |                      |    |                  |                          |    |                  |                                                            |   |               |                                                            |   |               |                                                            |   |               |       |   |               |                |    |                |         |    |                |                        |    |                |                         |    |                |              |    |                |        |    |                |                      |    |                |                          |    |                |               |    |                |                       |    |                |                 |    |                |      |
| 2  | 18-36 months ago                                                           |                                                                                                                  |                                                                                                                                                                                                                                                                                                                                                                                                                                                                                                                                                                                                                                                                                                                                                                                                                                                                                                                                                                                                                                                                                                                                                                                                                                                                                                                                                                                                                                                                                                                                                                                                                                                        |   |                 |                      |                  |                 |                          |    |                  |                      |    |                  |                          |    |                  |                                                            |   |               |                                                            |   |               |                                                            |   |               |       |   |               |                |    |                |         |    |                |                        |    |                |                         |    |                |              |    |                |        |    |                |                      |    |                |                          |    |                |               |    |                |                       |    |                |                 |    |                |      |
| 3  | >36 months ago                                                             |                                                                                                                  |                                                                                                                                                                                                                                                                                                                                                                                                                                                                                                                                                                                                                                                                                                                                                                                                                                                                                                                                                                                                                                                                                                                                                                                                                                                                                                                                                                                                                                                                                                                                                                                                                                                        |   |                 |                      |                  |                 |                          |    |                  |                      |    |                  |                          |    |                  |                                                            |   |               |                                                            |   |               |                                                            |   |               |       |   |               |                |    |                |         |    |                |                        |    |                |                         |    |                |              |    |                |        |    |                |                      |    |                |                          |    |                |               |    |                |                       |    |                |                 |    |                |      |
| 64 | [preghx_adm]                                                               | Has the woman been diagnosed with any of the following conditions DURING THIS pregnancy? (select all that apply) | checkbox<br><table border="1"> <tr> <td>1</td> <td>preghx_adm__1</td> <td>Gestational diabetes</td> </tr> <tr> <td>2</td> <td>preghx_adm__2</td> <td>Pre-eclampsia</td> </tr> <tr> <td>3</td> <td>preghx_adm__3</td> <td>Eclampsia</td> </tr> <tr> <td>4</td> <td>preghx_adm__4</td> <td>Gestational hypertension</td> </tr> <tr> <td>5</td> <td>preghx_adm__5</td> <td>Antepartum hemorrhage/<br/>vaginal bleeding (1st trimester)</td> </tr> <tr> <td>6</td> <td>preghx_adm__6</td> <td>Antepartum hemorrhage/<br/>vaginal bleeding (2nd trimester)</td> </tr> <tr> <td>7</td> <td>preghx_adm__7</td> <td>Antepartum hemorrhage/<br/>vaginal bleeding (3rd trimester)</td> </tr> <tr> <td>8</td> <td>preghx_adm__8</td> <td>PPROM</td> </tr> <tr> <td>9</td> <td>preghx_adm__9</td> <td>Preterm labour</td> </tr> <tr> <td>10</td> <td>preghx_adm__10</td> <td>Malaria</td> </tr> <tr> <td>11</td> <td>preghx_adm__11</td> <td>HIV (diagnosed DURING)</td> </tr> <tr> <td>12</td> <td>preghx_adm__12</td> <td>Urinary tract infection</td> </tr> <tr> <td>13</td> <td>preghx_adm__13</td> <td>Tuberculosis</td> </tr> <tr> <td>14</td> <td>preghx_adm__14</td> <td>Anemia</td> </tr> <tr> <td>15</td> <td>preghx_adm__15</td> <td>COVID-19 (suspected)</td> </tr> <tr> <td>16</td> <td>preghx_adm__16</td> <td>COVID-19 (positive test)</td> </tr> <tr> <td>17</td> <td>preghx_adm__17</td> <td>Hepatitis B/C</td> </tr> <tr> <td>18</td> <td>preghx_adm__18</td> <td>Mental Health Illness</td> </tr> <tr> <td>98</td> <td>preghx_adm__98</td> <td>Other Infection</td> </tr> <tr> <td>99</td> <td>preghx_adm__99</td> <td>None</td> </tr> </table> | 1 | preghx_adm__1   | Gestational diabetes | 2                | preghx_adm__2   | Pre-eclampsia            | 3  | preghx_adm__3    | Eclampsia            | 4  | preghx_adm__4    | Gestational hypertension | 5  | preghx_adm__5    | Antepartum hemorrhage/<br>vaginal bleeding (1st trimester) | 6 | preghx_adm__6 | Antepartum hemorrhage/<br>vaginal bleeding (2nd trimester) | 7 | preghx_adm__7 | Antepartum hemorrhage/<br>vaginal bleeding (3rd trimester) | 8 | preghx_adm__8 | PPROM | 9 | preghx_adm__9 | Preterm labour | 10 | preghx_adm__10 | Malaria | 11 | preghx_adm__11 | HIV (diagnosed DURING) | 12 | preghx_adm__12 | Urinary tract infection | 13 | preghx_adm__13 | Tuberculosis | 14 | preghx_adm__14 | Anemia | 15 | preghx_adm__15 | COVID-19 (suspected) | 16 | preghx_adm__16 | COVID-19 (positive test) | 17 | preghx_adm__17 | Hepatitis B/C | 18 | preghx_adm__18 | Mental Health Illness | 98 | preghx_adm__98 | Other Infection | 99 | preghx_adm__99 | None |
| 1  | preghx_adm__1                                                              | Gestational diabetes                                                                                             |                                                                                                                                                                                                                                                                                                                                                                                                                                                                                                                                                                                                                                                                                                                                                                                                                                                                                                                                                                                                                                                                                                                                                                                                                                                                                                                                                                                                                                                                                                                                                                                                                                                        |   |                 |                      |                  |                 |                          |    |                  |                      |    |                  |                          |    |                  |                                                            |   |               |                                                            |   |               |                                                            |   |               |       |   |               |                |    |                |         |    |                |                        |    |                |                         |    |                |              |    |                |        |    |                |                      |    |                |                          |    |                |               |    |                |                       |    |                |                 |    |                |      |
| 2  | preghx_adm__2                                                              | Pre-eclampsia                                                                                                    |                                                                                                                                                                                                                                                                                                                                                                                                                                                                                                                                                                                                                                                                                                                                                                                                                                                                                                                                                                                                                                                                                                                                                                                                                                                                                                                                                                                                                                                                                                                                                                                                                                                        |   |                 |                      |                  |                 |                          |    |                  |                      |    |                  |                          |    |                  |                                                            |   |               |                                                            |   |               |                                                            |   |               |       |   |               |                |    |                |         |    |                |                        |    |                |                         |    |                |              |    |                |        |    |                |                      |    |                |                          |    |                |               |    |                |                       |    |                |                 |    |                |      |
| 3  | preghx_adm__3                                                              | Eclampsia                                                                                                        |                                                                                                                                                                                                                                                                                                                                                                                                                                                                                                                                                                                                                                                                                                                                                                                                                                                                                                                                                                                                                                                                                                                                                                                                                                                                                                                                                                                                                                                                                                                                                                                                                                                        |   |                 |                      |                  |                 |                          |    |                  |                      |    |                  |                          |    |                  |                                                            |   |               |                                                            |   |               |                                                            |   |               |       |   |               |                |    |                |         |    |                |                        |    |                |                         |    |                |              |    |                |        |    |                |                      |    |                |                          |    |                |               |    |                |                       |    |                |                 |    |                |      |
| 4  | preghx_adm__4                                                              | Gestational hypertension                                                                                         |                                                                                                                                                                                                                                                                                                                                                                                                                                                                                                                                                                                                                                                                                                                                                                                                                                                                                                                                                                                                                                                                                                                                                                                                                                                                                                                                                                                                                                                                                                                                                                                                                                                        |   |                 |                      |                  |                 |                          |    |                  |                      |    |                  |                          |    |                  |                                                            |   |               |                                                            |   |               |                                                            |   |               |       |   |               |                |    |                |         |    |                |                        |    |                |                         |    |                |              |    |                |        |    |                |                      |    |                |                          |    |                |               |    |                |                       |    |                |                 |    |                |      |
| 5  | preghx_adm__5                                                              | Antepartum hemorrhage/<br>vaginal bleeding (1st trimester)                                                       |                                                                                                                                                                                                                                                                                                                                                                                                                                                                                                                                                                                                                                                                                                                                                                                                                                                                                                                                                                                                                                                                                                                                                                                                                                                                                                                                                                                                                                                                                                                                                                                                                                                        |   |                 |                      |                  |                 |                          |    |                  |                      |    |                  |                          |    |                  |                                                            |   |               |                                                            |   |               |                                                            |   |               |       |   |               |                |    |                |         |    |                |                        |    |                |                         |    |                |              |    |                |        |    |                |                      |    |                |                          |    |                |               |    |                |                       |    |                |                 |    |                |      |
| 6  | preghx_adm__6                                                              | Antepartum hemorrhage/<br>vaginal bleeding (2nd trimester)                                                       |                                                                                                                                                                                                                                                                                                                                                                                                                                                                                                                                                                                                                                                                                                                                                                                                                                                                                                                                                                                                                                                                                                                                                                                                                                                                                                                                                                                                                                                                                                                                                                                                                                                        |   |                 |                      |                  |                 |                          |    |                  |                      |    |                  |                          |    |                  |                                                            |   |               |                                                            |   |               |                                                            |   |               |       |   |               |                |    |                |         |    |                |                        |    |                |                         |    |                |              |    |                |        |    |                |                      |    |                |                          |    |                |               |    |                |                       |    |                |                 |    |                |      |
| 7  | preghx_adm__7                                                              | Antepartum hemorrhage/<br>vaginal bleeding (3rd trimester)                                                       |                                                                                                                                                                                                                                                                                                                                                                                                                                                                                                                                                                                                                                                                                                                                                                                                                                                                                                                                                                                                                                                                                                                                                                                                                                                                                                                                                                                                                                                                                                                                                                                                                                                        |   |                 |                      |                  |                 |                          |    |                  |                      |    |                  |                          |    |                  |                                                            |   |               |                                                            |   |               |                                                            |   |               |       |   |               |                |    |                |         |    |                |                        |    |                |                         |    |                |              |    |                |        |    |                |                      |    |                |                          |    |                |               |    |                |                       |    |                |                 |    |                |      |
| 8  | preghx_adm__8                                                              | PPROM                                                                                                            |                                                                                                                                                                                                                                                                                                                                                                                                                                                                                                                                                                                                                                                                                                                                                                                                                                                                                                                                                                                                                                                                                                                                                                                                                                                                                                                                                                                                                                                                                                                                                                                                                                                        |   |                 |                      |                  |                 |                          |    |                  |                      |    |                  |                          |    |                  |                                                            |   |               |                                                            |   |               |                                                            |   |               |       |   |               |                |    |                |         |    |                |                        |    |                |                         |    |                |              |    |                |        |    |                |                      |    |                |                          |    |                |               |    |                |                       |    |                |                 |    |                |      |
| 9  | preghx_adm__9                                                              | Preterm labour                                                                                                   |                                                                                                                                                                                                                                                                                                                                                                                                                                                                                                                                                                                                                                                                                                                                                                                                                                                                                                                                                                                                                                                                                                                                                                                                                                                                                                                                                                                                                                                                                                                                                                                                                                                        |   |                 |                      |                  |                 |                          |    |                  |                      |    |                  |                          |    |                  |                                                            |   |               |                                                            |   |               |                                                            |   |               |       |   |               |                |    |                |         |    |                |                        |    |                |                         |    |                |              |    |                |        |    |                |                      |    |                |                          |    |                |               |    |                |                       |    |                |                 |    |                |      |
| 10 | preghx_adm__10                                                             | Malaria                                                                                                          |                                                                                                                                                                                                                                                                                                                                                                                                                                                                                                                                                                                                                                                                                                                                                                                                                                                                                                                                                                                                                                                                                                                                                                                                                                                                                                                                                                                                                                                                                                                                                                                                                                                        |   |                 |                      |                  |                 |                          |    |                  |                      |    |                  |                          |    |                  |                                                            |   |               |                                                            |   |               |                                                            |   |               |       |   |               |                |    |                |         |    |                |                        |    |                |                         |    |                |              |    |                |        |    |                |                      |    |                |                          |    |                |               |    |                |                       |    |                |                 |    |                |      |
| 11 | preghx_adm__11                                                             | HIV (diagnosed DURING)                                                                                           |                                                                                                                                                                                                                                                                                                                                                                                                                                                                                                                                                                                                                                                                                                                                                                                                                                                                                                                                                                                                                                                                                                                                                                                                                                                                                                                                                                                                                                                                                                                                                                                                                                                        |   |                 |                      |                  |                 |                          |    |                  |                      |    |                  |                          |    |                  |                                                            |   |               |                                                            |   |               |                                                            |   |               |       |   |               |                |    |                |         |    |                |                        |    |                |                         |    |                |              |    |                |        |    |                |                      |    |                |                          |    |                |               |    |                |                       |    |                |                 |    |                |      |
| 12 | preghx_adm__12                                                             | Urinary tract infection                                                                                          |                                                                                                                                                                                                                                                                                                                                                                                                                                                                                                                                                                                                                                                                                                                                                                                                                                                                                                                                                                                                                                                                                                                                                                                                                                                                                                                                                                                                                                                                                                                                                                                                                                                        |   |                 |                      |                  |                 |                          |    |                  |                      |    |                  |                          |    |                  |                                                            |   |               |                                                            |   |               |                                                            |   |               |       |   |               |                |    |                |         |    |                |                        |    |                |                         |    |                |              |    |                |        |    |                |                      |    |                |                          |    |                |               |    |                |                       |    |                |                 |    |                |      |
| 13 | preghx_adm__13                                                             | Tuberculosis                                                                                                     |                                                                                                                                                                                                                                                                                                                                                                                                                                                                                                                                                                                                                                                                                                                                                                                                                                                                                                                                                                                                                                                                                                                                                                                                                                                                                                                                                                                                                                                                                                                                                                                                                                                        |   |                 |                      |                  |                 |                          |    |                  |                      |    |                  |                          |    |                  |                                                            |   |               |                                                            |   |               |                                                            |   |               |       |   |               |                |    |                |         |    |                |                        |    |                |                         |    |                |              |    |                |        |    |                |                      |    |                |                          |    |                |               |    |                |                       |    |                |                 |    |                |      |
| 14 | preghx_adm__14                                                             | Anemia                                                                                                           |                                                                                                                                                                                                                                                                                                                                                                                                                                                                                                                                                                                                                                                                                                                                                                                                                                                                                                                                                                                                                                                                                                                                                                                                                                                                                                                                                                                                                                                                                                                                                                                                                                                        |   |                 |                      |                  |                 |                          |    |                  |                      |    |                  |                          |    |                  |                                                            |   |               |                                                            |   |               |                                                            |   |               |       |   |               |                |    |                |         |    |                |                        |    |                |                         |    |                |              |    |                |        |    |                |                      |    |                |                          |    |                |               |    |                |                       |    |                |                 |    |                |      |
| 15 | preghx_adm__15                                                             | COVID-19 (suspected)                                                                                             |                                                                                                                                                                                                                                                                                                                                                                                                                                                                                                                                                                                                                                                                                                                                                                                                                                                                                                                                                                                                                                                                                                                                                                                                                                                                                                                                                                                                                                                                                                                                                                                                                                                        |   |                 |                      |                  |                 |                          |    |                  |                      |    |                  |                          |    |                  |                                                            |   |               |                                                            |   |               |                                                            |   |               |       |   |               |                |    |                |         |    |                |                        |    |                |                         |    |                |              |    |                |        |    |                |                      |    |                |                          |    |                |               |    |                |                       |    |                |                 |    |                |      |
| 16 | preghx_adm__16                                                             | COVID-19 (positive test)                                                                                         |                                                                                                                                                                                                                                                                                                                                                                                                                                                                                                                                                                                                                                                                                                                                                                                                                                                                                                                                                                                                                                                                                                                                                                                                                                                                                                                                                                                                                                                                                                                                                                                                                                                        |   |                 |                      |                  |                 |                          |    |                  |                      |    |                  |                          |    |                  |                                                            |   |               |                                                            |   |               |                                                            |   |               |       |   |               |                |    |                |         |    |                |                        |    |                |                         |    |                |              |    |                |        |    |                |                      |    |                |                          |    |                |               |    |                |                       |    |                |                 |    |                |      |
| 17 | preghx_adm__17                                                             | Hepatitis B/C                                                                                                    |                                                                                                                                                                                                                                                                                                                                                                                                                                                                                                                                                                                                                                                                                                                                                                                                                                                                                                                                                                                                                                                                                                                                                                                                                                                                                                                                                                                                                                                                                                                                                                                                                                                        |   |                 |                      |                  |                 |                          |    |                  |                      |    |                  |                          |    |                  |                                                            |   |               |                                                            |   |               |                                                            |   |               |       |   |               |                |    |                |         |    |                |                        |    |                |                         |    |                |              |    |                |        |    |                |                      |    |                |                          |    |                |               |    |                |                       |    |                |                 |    |                |      |
| 18 | preghx_adm__18                                                             | Mental Health Illness                                                                                            |                                                                                                                                                                                                                                                                                                                                                                                                                                                                                                                                                                                                                                                                                                                                                                                                                                                                                                                                                                                                                                                                                                                                                                                                                                                                                                                                                                                                                                                                                                                                                                                                                                                        |   |                 |                      |                  |                 |                          |    |                  |                      |    |                  |                          |    |                  |                                                            |   |               |                                                            |   |               |                                                            |   |               |       |   |               |                |    |                |         |    |                |                        |    |                |                         |    |                |              |    |                |        |    |                |                      |    |                |                          |    |                |               |    |                |                       |    |                |                 |    |                |      |
| 98 | preghx_adm__98                                                             | Other Infection                                                                                                  |                                                                                                                                                                                                                                                                                                                                                                                                                                                                                                                                                                                                                                                                                                                                                                                                                                                                                                                                                                                                                                                                                                                                                                                                                                                                                                                                                                                                                                                                                                                                                                                                                                                        |   |                 |                      |                  |                 |                          |    |                  |                      |    |                  |                          |    |                  |                                                            |   |               |                                                            |   |               |                                                            |   |               |       |   |               |                |    |                |         |    |                |                        |    |                |                         |    |                |              |    |                |        |    |                |                      |    |                |                          |    |                |               |    |                |                       |    |                |                 |    |                |      |
| 99 | preghx_adm__99                                                             | None                                                                                                             |                                                                                                                                                                                                                                                                                                                                                                                                                                                                                                                                                                                                                                                                                                                                                                                                                                                                                                                                                                                                                                                                                                                                                                                                                                                                                                                                                                                                                                                                                                                                                                                                                                                        |   |                 |                      |                  |                 |                          |    |                  |                      |    |                  |                          |    |                  |                                                            |   |               |                                                            |   |               |                                                            |   |               |       |   |               |                |    |                |         |    |                |                        |    |                |                         |    |                |              |    |                |        |    |                |                      |    |                |                          |    |                |               |    |                |                       |    |                |                 |    |                |      |
| 65 | [placenta_adm]                                                             | Any known/suspected placental disorder (this pregnancy)                                                          | checkbox<br><table border="1"> <tr> <td>1</td> <td>placenta_adm__1</td> <td>Yes, placenta previa</td> </tr> <tr> <td>2</td> <td>placenta_adm__2</td> <td>Yes, placental abruption</td> </tr> <tr> <td>97</td> <td>placenta_adm__97</td> <td>Yes, other (specify)</td> </tr> <tr> <td>98</td> <td>placenta_adm__98</td> <td>No</td> </tr> <tr> <td>99</td> <td>placenta_adm__99</td> <td>Not sure</td> </tr> </table>                                                                                                                                                                                                                                                                                                                                                                                                                                                                                                                                                                                                                                                                                                                                                                                                                                                                                                                                                                                                                                                                                                                                                                                                                                   | 1 | placenta_adm__1 | Yes, placenta previa | 2                | placenta_adm__2 | Yes, placental abruption | 97 | placenta_adm__97 | Yes, other (specify) | 98 | placenta_adm__98 | No                       | 99 | placenta_adm__99 | Not sure                                                   |   |               |                                                            |   |               |                                                            |   |               |       |   |               |                |    |                |         |    |                |                        |    |                |                         |    |                |              |    |                |        |    |                |                      |    |                |                          |    |                |               |    |                |                       |    |                |                 |    |                |      |
| 1  | placenta_adm__1                                                            | Yes, placenta previa                                                                                             |                                                                                                                                                                                                                                                                                                                                                                                                                                                                                                                                                                                                                                                                                                                                                                                                                                                                                                                                                                                                                                                                                                                                                                                                                                                                                                                                                                                                                                                                                                                                                                                                                                                        |   |                 |                      |                  |                 |                          |    |                  |                      |    |                  |                          |    |                  |                                                            |   |               |                                                            |   |               |                                                            |   |               |       |   |               |                |    |                |         |    |                |                        |    |                |                         |    |                |              |    |                |        |    |                |                      |    |                |                          |    |                |               |    |                |                       |    |                |                 |    |                |      |
| 2  | placenta_adm__2                                                            | Yes, placental abruption                                                                                         |                                                                                                                                                                                                                                                                                                                                                                                                                                                                                                                                                                                                                                                                                                                                                                                                                                                                                                                                                                                                                                                                                                                                                                                                                                                                                                                                                                                                                                                                                                                                                                                                                                                        |   |                 |                      |                  |                 |                          |    |                  |                      |    |                  |                          |    |                  |                                                            |   |               |                                                            |   |               |                                                            |   |               |       |   |               |                |    |                |         |    |                |                        |    |                |                         |    |                |              |    |                |        |    |                |                      |    |                |                          |    |                |               |    |                |                       |    |                |                 |    |                |      |
| 97 | placenta_adm__97                                                           | Yes, other (specify)                                                                                             |                                                                                                                                                                                                                                                                                                                                                                                                                                                                                                                                                                                                                                                                                                                                                                                                                                                                                                                                                                                                                                                                                                                                                                                                                                                                                                                                                                                                                                                                                                                                                                                                                                                        |   |                 |                      |                  |                 |                          |    |                  |                      |    |                  |                          |    |                  |                                                            |   |               |                                                            |   |               |                                                            |   |               |       |   |               |                |    |                |         |    |                |                        |    |                |                         |    |                |              |    |                |        |    |                |                      |    |                |                          |    |                |               |    |                |                       |    |                |                 |    |                |      |
| 98 | placenta_adm__98                                                           | No                                                                                                               |                                                                                                                                                                                                                                                                                                                                                                                                                                                                                                                                                                                                                                                                                                                                                                                                                                                                                                                                                                                                                                                                                                                                                                                                                                                                                                                                                                                                                                                                                                                                                                                                                                                        |   |                 |                      |                  |                 |                          |    |                  |                      |    |                  |                          |    |                  |                                                            |   |               |                                                            |   |               |                                                            |   |               |       |   |               |                |    |                |         |    |                |                        |    |                |                         |    |                |              |    |                |        |    |                |                      |    |                |                          |    |                |               |    |                |                       |    |                |                 |    |                |      |
| 99 | placenta_adm__99                                                           | Not sure                                                                                                         |                                                                                                                                                                                                                                                                                                                                                                                                                                                                                                                                                                                                                                                                                                                                                                                                                                                                                                                                                                                                                                                                                                                                                                                                                                                                                                                                                                                                                                                                                                                                                                                                                                                        |   |                 |                      |                  |                 |                          |    |                  |                      |    |                  |                          |    |                  |                                                            |   |               |                                                            |   |               |                                                            |   |               |       |   |               |                |    |                |         |    |                |                        |    |                |                         |    |                |              |    |                |        |    |                |                      |    |                |                          |    |                |               |    |                |                       |    |                |                 |    |                |      |
| 66 | [placentaother_adm]<br>Show the field ONLY if:<br>[placenta_adm(97)] = '1' | Specify other                                                                                                    | text                                                                                                                                                                                                                                                                                                                                                                                                                                                                                                                                                                                                                                                                                                                                                                                                                                                                                                                                                                                                                                                                                                                                                                                                                                                                                                                                                                                                                                                                                                                                                                                                                                                   |   |                 |                      |                  |                 |                          |    |                  |                      |    |                  |                          |    |                  |                                                            |   |               |                                                            |   |               |                                                            |   |               |       |   |               |                |    |                |         |    |                |                        |    |                |                         |    |                |              |    |                |        |    |                |                      |    |                |                          |    |                |               |    |                |                       |    |                |                 |    |                |      |
| 67 | [medhbp_adm]                                                               | Is she currently taking medication for high blood pressure?                                                      | dropdown<br><table border="1"> <tr> <td>1</td> <td>Yes</td> </tr> <tr> <td>2</td> <td>No</td> </tr> <tr> <td>99</td> <td>Not sure</td> </tr> </table>                                                                                                                                                                                                                                                                                                                                                                                                                                                                                                                                                                                                                                                                                                                                                                                                                                                                                                                                                                                                                                                                                                                                                                                                                                                                                                                                                                                                                                                                                                  | 1 | Yes             | 2                    | No               | 99              | Not sure                 |    |                  |                      |    |                  |                          |    |                  |                                                            |   |               |                                                            |   |               |                                                            |   |               |       |   |               |                |    |                |         |    |                |                        |    |                |                         |    |                |              |    |                |        |    |                |                      |    |                |                          |    |                |               |    |                |                       |    |                |                 |    |                |      |
| 1  | Yes                                                                        |                                                                                                                  |                                                                                                                                                                                                                                                                                                                                                                                                                                                                                                                                                                                                                                                                                                                                                                                                                                                                                                                                                                                                                                                                                                                                                                                                                                                                                                                                                                                                                                                                                                                                                                                                                                                        |   |                 |                      |                  |                 |                          |    |                  |                      |    |                  |                          |    |                  |                                                            |   |               |                                                            |   |               |                                                            |   |               |       |   |               |                |    |                |         |    |                |                        |    |                |                         |    |                |              |    |                |        |    |                |                      |    |                |                          |    |                |               |    |                |                       |    |                |                 |    |                |      |
| 2  | No                                                                         |                                                                                                                  |                                                                                                                                                                                                                                                                                                                                                                                                                                                                                                                                                                                                                                                                                                                                                                                                                                                                                                                                                                                                                                                                                                                                                                                                                                                                                                                                                                                                                                                                                                                                                                                                                                                        |   |                 |                      |                  |                 |                          |    |                  |                      |    |                  |                          |    |                  |                                                            |   |               |                                                            |   |               |                                                            |   |               |       |   |               |                |    |                |         |    |                |                        |    |                |                         |    |                |              |    |                |        |    |                |                      |    |                |                          |    |                |               |    |                |                       |    |                |                 |    |                |      |
| 99 | Not sure                                                                   |                                                                                                                  |                                                                                                                                                                                                                                                                                                                                                                                                                                                                                                                                                                                                                                                                                                                                                                                                                                                                                                                                                                                                                                                                                                                                                                                                                                                                                                                                                                                                                                                                                                                                                                                                                                                        |   |                 |                      |                  |                 |                          |    |                  |                      |    |                  |                          |    |                  |                                                            |   |               |                                                            |   |               |                                                            |   |               |       |   |               |                |    |                |         |    |                |                        |    |                |                         |    |                |              |    |                |        |    |                |                      |    |                |                          |    |                |               |    |                |                       |    |                |                 |    |                |      |

|    |                                                                                                                                                                          |                                                                                                                                          |                                                                                                                                                                                                                                                                                                                                                                                                                                                                                                                                                                                                                                                                                                                                                                                                                                                                                                                                                                                                                                                                                                                                                                                                                               |   |                                                      |                      |                                                      |                   |                                                       |   |                                           |           |   |                   |                          |   |                   |                                         |   |                   |       |   |                   |                |   |                   |         |   |                   |     |    |                    |                         |    |                    |              |    |                    |        |    |                    |             |    |                    |                                  |    |                    |                 |    |                    |                 |
|----|--------------------------------------------------------------------------------------------------------------------------------------------------------------------------|------------------------------------------------------------------------------------------------------------------------------------------|-------------------------------------------------------------------------------------------------------------------------------------------------------------------------------------------------------------------------------------------------------------------------------------------------------------------------------------------------------------------------------------------------------------------------------------------------------------------------------------------------------------------------------------------------------------------------------------------------------------------------------------------------------------------------------------------------------------------------------------------------------------------------------------------------------------------------------------------------------------------------------------------------------------------------------------------------------------------------------------------------------------------------------------------------------------------------------------------------------------------------------------------------------------------------------------------------------------------------------|---|------------------------------------------------------|----------------------|------------------------------------------------------|-------------------|-------------------------------------------------------|---|-------------------------------------------|-----------|---|-------------------|--------------------------|---|-------------------|-----------------------------------------|---|-------------------|-------|---|-------------------|----------------|---|-------------------|---------|---|-------------------|-----|----|--------------------|-------------------------|----|--------------------|--------------|----|--------------------|--------|----|--------------------|-------------|----|--------------------|----------------------------------|----|--------------------|-----------------|----|--------------------|-----------------|
| 68 | [medarv_adm]<br>Show the field ONLY if:<br>[medhx_adm(1)] = '1' or [preg<br>hx_adm(11)] = '1'                                                                            | Is she currently taking ARVs for HIV treatment?                                                                                          | dropdown<br><table border="1"> <tr><td>1</td><td>Yes</td></tr> <tr><td>2</td><td>No</td></tr> <tr><td>99</td><td>Not sure</td></tr> </table>                                                                                                                                                                                                                                                                                                                                                                                                                                                                                                                                                                                                                                                                                                                                                                                                                                                                                                                                                                                                                                                                                  | 1 | Yes                                                  | 2                    | No                                                   | 99                | Not sure                                              |   |                                           |           |   |                   |                          |   |                   |                                         |   |                   |       |   |                   |                |   |                   |         |   |                   |     |    |                    |                         |    |                    |              |    |                    |        |    |                    |             |    |                    |                                  |    |                    |                 |    |                    |                 |
| 1  | Yes                                                                                                                                                                      |                                                                                                                                          |                                                                                                                                                                                                                                                                                                                                                                                                                                                                                                                                                                                                                                                                                                                                                                                                                                                                                                                                                                                                                                                                                                                                                                                                                               |   |                                                      |                      |                                                      |                   |                                                       |   |                                           |           |   |                   |                          |   |                   |                                         |   |                   |       |   |                   |                |   |                   |         |   |                   |     |    |                    |                         |    |                    |              |    |                    |        |    |                    |             |    |                    |                                  |    |                    |                 |    |                    |                 |
| 2  | No                                                                                                                                                                       |                                                                                                                                          |                                                                                                                                                                                                                                                                                                                                                                                                                                                                                                                                                                                                                                                                                                                                                                                                                                                                                                                                                                                                                                                                                                                                                                                                                               |   |                                                      |                      |                                                      |                   |                                                       |   |                                           |           |   |                   |                          |   |                   |                                         |   |                   |       |   |                   |                |   |                   |         |   |                   |     |    |                    |                         |    |                    |              |    |                    |        |    |                    |             |    |                    |                                  |    |                    |                 |    |                    |                 |
| 99 | Not sure                                                                                                                                                                 |                                                                                                                                          |                                                                                                                                                                                                                                                                                                                                                                                                                                                                                                                                                                                                                                                                                                                                                                                                                                                                                                                                                                                                                                                                                                                                                                                                                               |   |                                                      |                      |                                                      |                   |                                                       |   |                                           |           |   |                   |                          |   |                   |                                         |   |                   |       |   |                   |                |   |                   |         |   |                   |     |    |                    |                         |    |                    |              |    |                    |        |    |                    |             |    |                    |                                  |    |                    |                 |    |                    |                 |
| 69 | [covidvax_adm]                                                                                                                                                           | Has woman been vaccinated against COVID-19                                                                                               | dropdown<br><table border="1"> <tr><td>1</td><td>Yes - Fully vaccinated (completion DURING pregnancy)</td></tr> <tr><td>2</td><td>Yes - Fully vaccinated (completion BEFORE pregnancy)</td></tr> <tr><td>3</td><td>Yes - Currently partially vaccinated</td></tr> <tr><td>4</td><td>No - Not vaccinated</td></tr> </table>                                                                                                                                                                                                                                                                                                                                                                                                                                                                                                                                                                                                                                                                                                                                                                                                                                                                                                    | 1 | Yes - Fully vaccinated (completion DURING pregnancy) | 2                    | Yes - Fully vaccinated (completion BEFORE pregnancy) | 3                 | Yes - Currently partially vaccinated                  | 4 | No - Not vaccinated                       |           |   |                   |                          |   |                   |                                         |   |                   |       |   |                   |                |   |                   |         |   |                   |     |    |                    |                         |    |                    |              |    |                    |        |    |                    |             |    |                    |                                  |    |                    |                 |    |                    |                 |
| 1  | Yes - Fully vaccinated (completion DURING pregnancy)                                                                                                                     |                                                                                                                                          |                                                                                                                                                                                                                                                                                                                                                                                                                                                                                                                                                                                                                                                                                                                                                                                                                                                                                                                                                                                                                                                                                                                                                                                                                               |   |                                                      |                      |                                                      |                   |                                                       |   |                                           |           |   |                   |                          |   |                   |                                         |   |                   |       |   |                   |                |   |                   |         |   |                   |     |    |                    |                         |    |                    |              |    |                    |        |    |                    |             |    |                    |                                  |    |                    |                 |    |                    |                 |
| 2  | Yes - Fully vaccinated (completion BEFORE pregnancy)                                                                                                                     |                                                                                                                                          |                                                                                                                                                                                                                                                                                                                                                                                                                                                                                                                                                                                                                                                                                                                                                                                                                                                                                                                                                                                                                                                                                                                                                                                                                               |   |                                                      |                      |                                                      |                   |                                                       |   |                                           |           |   |                   |                          |   |                   |                                         |   |                   |       |   |                   |                |   |                   |         |   |                   |     |    |                    |                         |    |                    |              |    |                    |        |    |                    |             |    |                    |                                  |    |                    |                 |    |                    |                 |
| 3  | Yes - Currently partially vaccinated                                                                                                                                     |                                                                                                                                          |                                                                                                                                                                                                                                                                                                                                                                                                                                                                                                                                                                                                                                                                                                                                                                                                                                                                                                                                                                                                                                                                                                                                                                                                                               |   |                                                      |                      |                                                      |                   |                                                       |   |                                           |           |   |                   |                          |   |                   |                                         |   |                   |       |   |                   |                |   |                   |         |   |                   |     |    |                    |                         |    |                    |              |    |                    |        |    |                    |             |    |                    |                                  |    |                    |                 |    |                    |                 |
| 4  | No - Not vaccinated                                                                                                                                                      |                                                                                                                                          |                                                                                                                                                                                                                                                                                                                                                                                                                                                                                                                                                                                                                                                                                                                                                                                                                                                                                                                                                                                                                                                                                                                                                                                                                               |   |                                                      |                      |                                                      |                   |                                                       |   |                                           |           |   |                   |                          |   |                   |                                         |   |                   |       |   |                   |                |   |                   |         |   |                   |     |    |                    |                         |    |                    |              |    |                    |        |    |                    |             |    |                    |                                  |    |                    |                 |    |                    |                 |
| 70 | [prevadm_adm]                                                                                                                                                            | Section Header: <i>Hospitalization During Pregnancy</i><br>Has the woman been admitted to hospital DURING this pregnancy for any reason? | yesno<br><table border="1"> <tr><td>1</td><td>Yes</td></tr> <tr><td>0</td><td>No</td></tr> </table>                                                                                                                                                                                                                                                                                                                                                                                                                                                                                                                                                                                                                                                                                                                                                                                                                                                                                                                                                                                                                                                                                                                           | 1 | Yes                                                  | 0                    | No                                                   |                   |                                                       |   |                                           |           |   |                   |                          |   |                   |                                         |   |                   |       |   |                   |                |   |                   |         |   |                   |     |    |                    |                         |    |                    |              |    |                    |        |    |                    |             |    |                    |                                  |    |                    |                 |    |                    |                 |
| 1  | Yes                                                                                                                                                                      |                                                                                                                                          |                                                                                                                                                                                                                                                                                                                                                                                                                                                                                                                                                                                                                                                                                                                                                                                                                                                                                                                                                                                                                                                                                                                                                                                                                               |   |                                                      |                      |                                                      |                   |                                                       |   |                                           |           |   |                   |                          |   |                   |                                         |   |                   |       |   |                   |                |   |                   |         |   |                   |     |    |                    |                         |    |                    |              |    |                    |        |    |                    |             |    |                    |                                  |    |                    |                 |    |                    |                 |
| 0  | No                                                                                                                                                                       |                                                                                                                                          |                                                                                                                                                                                                                                                                                                                                                                                                                                                                                                                                                                                                                                                                                                                                                                                                                                                                                                                                                                                                                                                                                                                                                                                                                               |   |                                                      |                      |                                                      |                   |                                                       |   |                                           |           |   |                   |                          |   |                   |                                         |   |                   |       |   |                   |                |   |                   |         |   |                   |     |    |                    |                         |    |                    |              |    |                    |        |    |                    |             |    |                    |                                  |    |                    |                 |    |                    |                 |
| 71 | [lngth_prevadm_adm]<br>Show the field ONLY if:<br>[prevadm_adm]='1'                                                                                                      | How long ago was this admission?                                                                                                         | dropdown<br><table border="1"> <tr><td>1</td><td>1 - 7 days (in the past week)</td></tr> <tr><td>2</td><td>7 - 28 days (from one week to one month ago)</td></tr> <tr><td>3</td><td>28 days - 6 months (from one month to six months ago)</td></tr> <tr><td>4</td><td>&gt; 6 months ago (more than six months ago)</td></tr> </table>                                                                                                                                                                                                                                                                                                                                                                                                                                                                                                                                                                                                                                                                                                                                                                                                                                                                                         | 1 | 1 - 7 days (in the past week)                        | 2                    | 7 - 28 days (from one week to one month ago)         | 3                 | 28 days - 6 months (from one month to six months ago) | 4 | > 6 months ago (more than six months ago) |           |   |                   |                          |   |                   |                                         |   |                   |       |   |                   |                |   |                   |         |   |                   |     |    |                    |                         |    |                    |              |    |                    |        |    |                    |             |    |                    |                                  |    |                    |                 |    |                    |                 |
| 1  | 1 - 7 days (in the past week)                                                                                                                                            |                                                                                                                                          |                                                                                                                                                                                                                                                                                                                                                                                                                                                                                                                                                                                                                                                                                                                                                                                                                                                                                                                                                                                                                                                                                                                                                                                                                               |   |                                                      |                      |                                                      |                   |                                                       |   |                                           |           |   |                   |                          |   |                   |                                         |   |                   |       |   |                   |                |   |                   |         |   |                   |     |    |                    |                         |    |                    |              |    |                    |        |    |                    |             |    |                    |                                  |    |                    |                 |    |                    |                 |
| 2  | 7 - 28 days (from one week to one month ago)                                                                                                                             |                                                                                                                                          |                                                                                                                                                                                                                                                                                                                                                                                                                                                                                                                                                                                                                                                                                                                                                                                                                                                                                                                                                                                                                                                                                                                                                                                                                               |   |                                                      |                      |                                                      |                   |                                                       |   |                                           |           |   |                   |                          |   |                   |                                         |   |                   |       |   |                   |                |   |                   |         |   |                   |     |    |                    |                         |    |                    |              |    |                    |        |    |                    |             |    |                    |                                  |    |                    |                 |    |                    |                 |
| 3  | 28 days - 6 months (from one month to six months ago)                                                                                                                    |                                                                                                                                          |                                                                                                                                                                                                                                                                                                                                                                                                                                                                                                                                                                                                                                                                                                                                                                                                                                                                                                                                                                                                                                                                                                                                                                                                                               |   |                                                      |                      |                                                      |                   |                                                       |   |                                           |           |   |                   |                          |   |                   |                                         |   |                   |       |   |                   |                |   |                   |         |   |                   |     |    |                    |                         |    |                    |              |    |                    |        |    |                    |             |    |                    |                                  |    |                    |                 |    |                    |                 |
| 4  | > 6 months ago (more than six months ago)                                                                                                                                |                                                                                                                                          |                                                                                                                                                                                                                                                                                                                                                                                                                                                                                                                                                                                                                                                                                                                                                                                                                                                                                                                                                                                                                                                                                                                                                                                                                               |   |                                                      |                      |                                                      |                   |                                                       |   |                                           |           |   |                   |                          |   |                   |                                         |   |                   |       |   |                   |                |   |                   |         |   |                   |     |    |                    |                         |    |                    |              |    |                    |        |    |                    |             |    |                    |                                  |    |                    |                 |    |                    |                 |
| 72 | [rs_prevadm_adm]<br>Show the field ONLY if:<br>[prevadm_adm]='1'                                                                                                         | What was the reason for this admission?                                                                                                  | checkbox<br><table border="1"> <tr><td>1</td><td>rs_prevadm_adm__1</td><td>Gestational diabetes</td></tr> <tr><td>2</td><td>rs_prevadm_adm__2</td><td>Pre-eclampsia</td></tr> <tr><td>3</td><td>rs_prevadm_adm__3</td><td>Eclampsia</td></tr> <tr><td>4</td><td>rs_prevadm_adm__4</td><td>Gestational hypertension</td></tr> <tr><td>5</td><td>rs_prevadm_adm__5</td><td>Antepartum hemorrhage/ vaginal bleeding</td></tr> <tr><td>6</td><td>rs_prevadm_adm__6</td><td>PPROM</td></tr> <tr><td>7</td><td>rs_prevadm_adm__7</td><td>Preterm labour</td></tr> <tr><td>8</td><td>rs_prevadm_adm__8</td><td>Malaria</td></tr> <tr><td>9</td><td>rs_prevadm_adm__9</td><td>HIV</td></tr> <tr><td>10</td><td>rs_prevadm_adm__10</td><td>Urinary tract infection</td></tr> <tr><td>11</td><td>rs_prevadm_adm__11</td><td>Tuberculosis</td></tr> <tr><td>12</td><td>rs_prevadm_adm__12</td><td>Anemia</td></tr> <tr><td>13</td><td>rs_prevadm_adm__13</td><td>Abuse/Fight</td></tr> <tr><td>14</td><td>rs_prevadm_adm__14</td><td>motor accident (car, boda, etc.)</td></tr> <tr><td>98</td><td>rs_prevadm_adm__98</td><td>Other Infection</td></tr> <tr><td>99</td><td>rs_prevadm_adm__99</td><td>Other (specify)</td></tr> </table> | 1 | rs_prevadm_adm__1                                    | Gestational diabetes | 2                                                    | rs_prevadm_adm__2 | Pre-eclampsia                                         | 3 | rs_prevadm_adm__3                         | Eclampsia | 4 | rs_prevadm_adm__4 | Gestational hypertension | 5 | rs_prevadm_adm__5 | Antepartum hemorrhage/ vaginal bleeding | 6 | rs_prevadm_adm__6 | PPROM | 7 | rs_prevadm_adm__7 | Preterm labour | 8 | rs_prevadm_adm__8 | Malaria | 9 | rs_prevadm_adm__9 | HIV | 10 | rs_prevadm_adm__10 | Urinary tract infection | 11 | rs_prevadm_adm__11 | Tuberculosis | 12 | rs_prevadm_adm__12 | Anemia | 13 | rs_prevadm_adm__13 | Abuse/Fight | 14 | rs_prevadm_adm__14 | motor accident (car, boda, etc.) | 98 | rs_prevadm_adm__98 | Other Infection | 99 | rs_prevadm_adm__99 | Other (specify) |
| 1  | rs_prevadm_adm__1                                                                                                                                                        | Gestational diabetes                                                                                                                     |                                                                                                                                                                                                                                                                                                                                                                                                                                                                                                                                                                                                                                                                                                                                                                                                                                                                                                                                                                                                                                                                                                                                                                                                                               |   |                                                      |                      |                                                      |                   |                                                       |   |                                           |           |   |                   |                          |   |                   |                                         |   |                   |       |   |                   |                |   |                   |         |   |                   |     |    |                    |                         |    |                    |              |    |                    |        |    |                    |             |    |                    |                                  |    |                    |                 |    |                    |                 |
| 2  | rs_prevadm_adm__2                                                                                                                                                        | Pre-eclampsia                                                                                                                            |                                                                                                                                                                                                                                                                                                                                                                                                                                                                                                                                                                                                                                                                                                                                                                                                                                                                                                                                                                                                                                                                                                                                                                                                                               |   |                                                      |                      |                                                      |                   |                                                       |   |                                           |           |   |                   |                          |   |                   |                                         |   |                   |       |   |                   |                |   |                   |         |   |                   |     |    |                    |                         |    |                    |              |    |                    |        |    |                    |             |    |                    |                                  |    |                    |                 |    |                    |                 |
| 3  | rs_prevadm_adm__3                                                                                                                                                        | Eclampsia                                                                                                                                |                                                                                                                                                                                                                                                                                                                                                                                                                                                                                                                                                                                                                                                                                                                                                                                                                                                                                                                                                                                                                                                                                                                                                                                                                               |   |                                                      |                      |                                                      |                   |                                                       |   |                                           |           |   |                   |                          |   |                   |                                         |   |                   |       |   |                   |                |   |                   |         |   |                   |     |    |                    |                         |    |                    |              |    |                    |        |    |                    |             |    |                    |                                  |    |                    |                 |    |                    |                 |
| 4  | rs_prevadm_adm__4                                                                                                                                                        | Gestational hypertension                                                                                                                 |                                                                                                                                                                                                                                                                                                                                                                                                                                                                                                                                                                                                                                                                                                                                                                                                                                                                                                                                                                                                                                                                                                                                                                                                                               |   |                                                      |                      |                                                      |                   |                                                       |   |                                           |           |   |                   |                          |   |                   |                                         |   |                   |       |   |                   |                |   |                   |         |   |                   |     |    |                    |                         |    |                    |              |    |                    |        |    |                    |             |    |                    |                                  |    |                    |                 |    |                    |                 |
| 5  | rs_prevadm_adm__5                                                                                                                                                        | Antepartum hemorrhage/ vaginal bleeding                                                                                                  |                                                                                                                                                                                                                                                                                                                                                                                                                                                                                                                                                                                                                                                                                                                                                                                                                                                                                                                                                                                                                                                                                                                                                                                                                               |   |                                                      |                      |                                                      |                   |                                                       |   |                                           |           |   |                   |                          |   |                   |                                         |   |                   |       |   |                   |                |   |                   |         |   |                   |     |    |                    |                         |    |                    |              |    |                    |        |    |                    |             |    |                    |                                  |    |                    |                 |    |                    |                 |
| 6  | rs_prevadm_adm__6                                                                                                                                                        | PPROM                                                                                                                                    |                                                                                                                                                                                                                                                                                                                                                                                                                                                                                                                                                                                                                                                                                                                                                                                                                                                                                                                                                                                                                                                                                                                                                                                                                               |   |                                                      |                      |                                                      |                   |                                                       |   |                                           |           |   |                   |                          |   |                   |                                         |   |                   |       |   |                   |                |   |                   |         |   |                   |     |    |                    |                         |    |                    |              |    |                    |        |    |                    |             |    |                    |                                  |    |                    |                 |    |                    |                 |
| 7  | rs_prevadm_adm__7                                                                                                                                                        | Preterm labour                                                                                                                           |                                                                                                                                                                                                                                                                                                                                                                                                                                                                                                                                                                                                                                                                                                                                                                                                                                                                                                                                                                                                                                                                                                                                                                                                                               |   |                                                      |                      |                                                      |                   |                                                       |   |                                           |           |   |                   |                          |   |                   |                                         |   |                   |       |   |                   |                |   |                   |         |   |                   |     |    |                    |                         |    |                    |              |    |                    |        |    |                    |             |    |                    |                                  |    |                    |                 |    |                    |                 |
| 8  | rs_prevadm_adm__8                                                                                                                                                        | Malaria                                                                                                                                  |                                                                                                                                                                                                                                                                                                                                                                                                                                                                                                                                                                                                                                                                                                                                                                                                                                                                                                                                                                                                                                                                                                                                                                                                                               |   |                                                      |                      |                                                      |                   |                                                       |   |                                           |           |   |                   |                          |   |                   |                                         |   |                   |       |   |                   |                |   |                   |         |   |                   |     |    |                    |                         |    |                    |              |    |                    |        |    |                    |             |    |                    |                                  |    |                    |                 |    |                    |                 |
| 9  | rs_prevadm_adm__9                                                                                                                                                        | HIV                                                                                                                                      |                                                                                                                                                                                                                                                                                                                                                                                                                                                                                                                                                                                                                                                                                                                                                                                                                                                                                                                                                                                                                                                                                                                                                                                                                               |   |                                                      |                      |                                                      |                   |                                                       |   |                                           |           |   |                   |                          |   |                   |                                         |   |                   |       |   |                   |                |   |                   |         |   |                   |     |    |                    |                         |    |                    |              |    |                    |        |    |                    |             |    |                    |                                  |    |                    |                 |    |                    |                 |
| 10 | rs_prevadm_adm__10                                                                                                                                                       | Urinary tract infection                                                                                                                  |                                                                                                                                                                                                                                                                                                                                                                                                                                                                                                                                                                                                                                                                                                                                                                                                                                                                                                                                                                                                                                                                                                                                                                                                                               |   |                                                      |                      |                                                      |                   |                                                       |   |                                           |           |   |                   |                          |   |                   |                                         |   |                   |       |   |                   |                |   |                   |         |   |                   |     |    |                    |                         |    |                    |              |    |                    |        |    |                    |             |    |                    |                                  |    |                    |                 |    |                    |                 |
| 11 | rs_prevadm_adm__11                                                                                                                                                       | Tuberculosis                                                                                                                             |                                                                                                                                                                                                                                                                                                                                                                                                                                                                                                                                                                                                                                                                                                                                                                                                                                                                                                                                                                                                                                                                                                                                                                                                                               |   |                                                      |                      |                                                      |                   |                                                       |   |                                           |           |   |                   |                          |   |                   |                                         |   |                   |       |   |                   |                |   |                   |         |   |                   |     |    |                    |                         |    |                    |              |    |                    |        |    |                    |             |    |                    |                                  |    |                    |                 |    |                    |                 |
| 12 | rs_prevadm_adm__12                                                                                                                                                       | Anemia                                                                                                                                   |                                                                                                                                                                                                                                                                                                                                                                                                                                                                                                                                                                                                                                                                                                                                                                                                                                                                                                                                                                                                                                                                                                                                                                                                                               |   |                                                      |                      |                                                      |                   |                                                       |   |                                           |           |   |                   |                          |   |                   |                                         |   |                   |       |   |                   |                |   |                   |         |   |                   |     |    |                    |                         |    |                    |              |    |                    |        |    |                    |             |    |                    |                                  |    |                    |                 |    |                    |                 |
| 13 | rs_prevadm_adm__13                                                                                                                                                       | Abuse/Fight                                                                                                                              |                                                                                                                                                                                                                                                                                                                                                                                                                                                                                                                                                                                                                                                                                                                                                                                                                                                                                                                                                                                                                                                                                                                                                                                                                               |   |                                                      |                      |                                                      |                   |                                                       |   |                                           |           |   |                   |                          |   |                   |                                         |   |                   |       |   |                   |                |   |                   |         |   |                   |     |    |                    |                         |    |                    |              |    |                    |        |    |                    |             |    |                    |                                  |    |                    |                 |    |                    |                 |
| 14 | rs_prevadm_adm__14                                                                                                                                                       | motor accident (car, boda, etc.)                                                                                                         |                                                                                                                                                                                                                                                                                                                                                                                                                                                                                                                                                                                                                                                                                                                                                                                                                                                                                                                                                                                                                                                                                                                                                                                                                               |   |                                                      |                      |                                                      |                   |                                                       |   |                                           |           |   |                   |                          |   |                   |                                         |   |                   |       |   |                   |                |   |                   |         |   |                   |     |    |                    |                         |    |                    |              |    |                    |        |    |                    |             |    |                    |                                  |    |                    |                 |    |                    |                 |
| 98 | rs_prevadm_adm__98                                                                                                                                                       | Other Infection                                                                                                                          |                                                                                                                                                                                                                                                                                                                                                                                                                                                                                                                                                                                                                                                                                                                                                                                                                                                                                                                                                                                                                                                                                                                                                                                                                               |   |                                                      |                      |                                                      |                   |                                                       |   |                                           |           |   |                   |                          |   |                   |                                         |   |                   |       |   |                   |                |   |                   |         |   |                   |     |    |                    |                         |    |                    |              |    |                    |        |    |                    |             |    |                    |                                  |    |                    |                 |    |                    |                 |
| 99 | rs_prevadm_adm__99                                                                                                                                                       | Other (specify)                                                                                                                          |                                                                                                                                                                                                                                                                                                                                                                                                                                                                                                                                                                                                                                                                                                                                                                                                                                                                                                                                                                                                                                                                                                                                                                                                                               |   |                                                      |                      |                                                      |                   |                                                       |   |                                           |           |   |                   |                          |   |                   |                                         |   |                   |       |   |                   |                |   |                   |         |   |                   |     |    |                    |                         |    |                    |              |    |                    |        |    |                    |             |    |                    |                                  |    |                    |                 |    |                    |                 |
| 73 | [rs_prevadm2_adm]<br>Show the field ONLY if:<br>[rs_prevadm_adm(99)] = '1' or<br>[rs_prevadm_adm(98)] = '1'                                                              | Specify other                                                                                                                            | text                                                                                                                                                                                                                                                                                                                                                                                                                                                                                                                                                                                                                                                                                                                                                                                                                                                                                                                                                                                                                                                                                                                                                                                                                          |   |                                                      |                      |                                                      |                   |                                                       |   |                                           |           |   |                   |                          |   |                   |                                         |   |                   |       |   |                   |                |   |                   |         |   |                   |     |    |                    |                         |    |                    |              |    |                    |        |    |                    |             |    |                    |                                  |    |                    |                 |    |                    |                 |
| 74 | [prevadm2_adm]<br>Show the field ONLY if:<br>[prevadm_adm] = '1'                                                                                                         | For how many days was the woman admitted                                                                                                 | text (integer, Min: 1, Max: 100)                                                                                                                                                                                                                                                                                                                                                                                                                                                                                                                                                                                                                                                                                                                                                                                                                                                                                                                                                                                                                                                                                                                                                                                              |   |                                                      |                      |                                                      |                   |                                                       |   |                                           |           |   |                   |                          |   |                   |                                         |   |                   |       |   |                   |                |   |                   |         |   |                   |     |    |                    |                         |    |                    |              |    |                    |        |    |                    |             |    |                    |                                  |    |                    |                 |    |                    |                 |
| 75 | [uti_abx_adm]<br>Show the field ONLY if:<br>[rs_prevadm_adm(10)] = '1' or<br>[rs_prevadm_adm(11)] = '1' or<br>[rs_prevadm_adm(8)] = '1' or<br>[rs_prevadm_adm(98)] = '1' | Was she given IV antibiotics/antimalarials during the admission?                                                                         | yesno<br><table border="1"> <tr><td>1</td><td>Yes</td></tr> <tr><td>0</td><td>No</td></tr> </table>                                                                                                                                                                                                                                                                                                                                                                                                                                                                                                                                                                                                                                                                                                                                                                                                                                                                                                                                                                                                                                                                                                                           | 1 | Yes                                                  | 0                    | No                                                   |                   |                                                       |   |                                           |           |   |                   |                          |   |                   |                                         |   |                   |       |   |                   |                |   |                   |         |   |                   |     |    |                    |                         |    |                    |              |    |                    |        |    |                    |             |    |                    |                                  |    |                    |                 |    |                    |                 |
| 1  | Yes                                                                                                                                                                      |                                                                                                                                          |                                                                                                                                                                                                                                                                                                                                                                                                                                                                                                                                                                                                                                                                                                                                                                                                                                                                                                                                                                                                                                                                                                                                                                                                                               |   |                                                      |                      |                                                      |                   |                                                       |   |                                           |           |   |                   |                          |   |                   |                                         |   |                   |       |   |                   |                |   |                   |         |   |                   |     |    |                    |                         |    |                    |              |    |                    |        |    |                    |             |    |                    |                                  |    |                    |                 |    |                    |                 |
| 0  | No                                                                                                                                                                       |                                                                                                                                          |                                                                                                                                                                                                                                                                                                                                                                                                                                                                                                                                                                                                                                                                                                                                                                                                                                                                                                                                                                                                                                                                                                                                                                                                                               |   |                                                      |                      |                                                      |                   |                                                       |   |                                           |           |   |                   |                          |   |                   |                                         |   |                   |       |   |                   |                |   |                   |         |   |                   |     |    |                    |                         |    |                    |              |    |                    |        |    |                    |             |    |                    |                                  |    |                    |                 |    |                    |                 |

|                                                                   |                                                     |                                                                                                                               |                                                                                                                                                                                                                                                                                                                                                                                                                                                                                                                                        |   |                    |              |                    |                    |                 |   |                    |                  |                                                     |                    |            |   |                    |         |   |                    |                             |   |                    |       |
|-------------------------------------------------------------------|-----------------------------------------------------|-------------------------------------------------------------------------------------------------------------------------------|----------------------------------------------------------------------------------------------------------------------------------------------------------------------------------------------------------------------------------------------------------------------------------------------------------------------------------------------------------------------------------------------------------------------------------------------------------------------------------------------------------------------------------------|---|--------------------|--------------|--------------------|--------------------|-----------------|---|--------------------|------------------|-----------------------------------------------------|--------------------|------------|---|--------------------|---------|---|--------------------|-----------------------------|---|--------------------|-------|
| 76                                                                | [numberanc_adm]                                     | Section Header: <i>ANC visit history</i><br>How many ANC visits did you attend (best estimate if unsure)?                     | dropdown<br><table border="1"> <tr><td>0</td><td>0</td></tr> <tr><td>1</td><td>1</td></tr> <tr><td>2</td><td>2</td></tr> <tr><td>3</td><td>3</td></tr> <tr><td>4</td><td>4</td></tr> <tr><td>5</td><td>5</td></tr> <tr><td>6</td><td>6</td></tr> <tr><td>7</td><td>7</td></tr> <tr><td>8</td><td>8</td></tr> <tr><td>9</td><td>&gt;8</td></tr> </table>                                                                                                                                                                                | 0 | 0                  | 1            | 1                  | 2                  | 2               | 3 | 3                  | 4                | 4                                                   | 5                  | 5          | 6 | 6                  | 7       | 7 | 8                  | 8                           | 9 | >8                 |       |
| 0                                                                 | 0                                                   |                                                                                                                               |                                                                                                                                                                                                                                                                                                                                                                                                                                                                                                                                        |   |                    |              |                    |                    |                 |   |                    |                  |                                                     |                    |            |   |                    |         |   |                    |                             |   |                    |       |
| 1                                                                 | 1                                                   |                                                                                                                               |                                                                                                                                                                                                                                                                                                                                                                                                                                                                                                                                        |   |                    |              |                    |                    |                 |   |                    |                  |                                                     |                    |            |   |                    |         |   |                    |                             |   |                    |       |
| 2                                                                 | 2                                                   |                                                                                                                               |                                                                                                                                                                                                                                                                                                                                                                                                                                                                                                                                        |   |                    |              |                    |                    |                 |   |                    |                  |                                                     |                    |            |   |                    |         |   |                    |                             |   |                    |       |
| 3                                                                 | 3                                                   |                                                                                                                               |                                                                                                                                                                                                                                                                                                                                                                                                                                                                                                                                        |   |                    |              |                    |                    |                 |   |                    |                  |                                                     |                    |            |   |                    |         |   |                    |                             |   |                    |       |
| 4                                                                 | 4                                                   |                                                                                                                               |                                                                                                                                                                                                                                                                                                                                                                                                                                                                                                                                        |   |                    |              |                    |                    |                 |   |                    |                  |                                                     |                    |            |   |                    |         |   |                    |                             |   |                    |       |
| 5                                                                 | 5                                                   |                                                                                                                               |                                                                                                                                                                                                                                                                                                                                                                                                                                                                                                                                        |   |                    |              |                    |                    |                 |   |                    |                  |                                                     |                    |            |   |                    |         |   |                    |                             |   |                    |       |
| 6                                                                 | 6                                                   |                                                                                                                               |                                                                                                                                                                                                                                                                                                                                                                                                                                                                                                                                        |   |                    |              |                    |                    |                 |   |                    |                  |                                                     |                    |            |   |                    |         |   |                    |                             |   |                    |       |
| 7                                                                 | 7                                                   |                                                                                                                               |                                                                                                                                                                                                                                                                                                                                                                                                                                                                                                                                        |   |                    |              |                    |                    |                 |   |                    |                  |                                                     |                    |            |   |                    |         |   |                    |                             |   |                    |       |
| 8                                                                 | 8                                                   |                                                                                                                               |                                                                                                                                                                                                                                                                                                                                                                                                                                                                                                                                        |   |                    |              |                    |                    |                 |   |                    |                  |                                                     |                    |            |   |                    |         |   |                    |                             |   |                    |       |
| 9                                                                 | >8                                                  |                                                                                                                               |                                                                                                                                                                                                                                                                                                                                                                                                                                                                                                                                        |   |                    |              |                    |                    |                 |   |                    |                  |                                                     |                    |            |   |                    |         |   |                    |                             |   |                    |       |
| 77                                                                | [ancprovider_adm]                                   | Which types of healthcare providers provided your ANC care (choose all that apply)                                            | checkbox<br><table border="1"> <tr><td>1</td><td>ancprovider_adm__1</td><td>Obstetrician</td></tr> <tr><td>2</td><td>ancprovider_adm__2</td><td>Medical Officer</td></tr> <tr><td>3</td><td>ancprovider_adm__3</td><td>Clinical Officer</td></tr> <tr><td>4</td><td>ancprovider_adm__4</td><td>Nurse</td></tr> <tr><td>5</td><td>ancprovider_adm__5</td><td>midwife</td></tr> <tr><td>6</td><td>ancprovider_adm__6</td><td>Traditional Birth Attendant</td></tr> <tr><td>7</td><td>ancprovider_adm__7</td><td>Other</td></tr> </table> | 1 | ancprovider_adm__1 | Obstetrician | 2                  | ancprovider_adm__2 | Medical Officer | 3 | ancprovider_adm__3 | Clinical Officer | 4                                                   | ancprovider_adm__4 | Nurse      | 5 | ancprovider_adm__5 | midwife | 6 | ancprovider_adm__6 | Traditional Birth Attendant | 7 | ancprovider_adm__7 | Other |
| 1                                                                 | ancprovider_adm__1                                  | Obstetrician                                                                                                                  |                                                                                                                                                                                                                                                                                                                                                                                                                                                                                                                                        |   |                    |              |                    |                    |                 |   |                    |                  |                                                     |                    |            |   |                    |         |   |                    |                             |   |                    |       |
| 2                                                                 | ancprovider_adm__2                                  | Medical Officer                                                                                                               |                                                                                                                                                                                                                                                                                                                                                                                                                                                                                                                                        |   |                    |              |                    |                    |                 |   |                    |                  |                                                     |                    |            |   |                    |         |   |                    |                             |   |                    |       |
| 3                                                                 | ancprovider_adm__3                                  | Clinical Officer                                                                                                              |                                                                                                                                                                                                                                                                                                                                                                                                                                                                                                                                        |   |                    |              |                    |                    |                 |   |                    |                  |                                                     |                    |            |   |                    |         |   |                    |                             |   |                    |       |
| 4                                                                 | ancprovider_adm__4                                  | Nurse                                                                                                                         |                                                                                                                                                                                                                                                                                                                                                                                                                                                                                                                                        |   |                    |              |                    |                    |                 |   |                    |                  |                                                     |                    |            |   |                    |         |   |                    |                             |   |                    |       |
| 5                                                                 | ancprovider_adm__5                                  | midwife                                                                                                                       |                                                                                                                                                                                                                                                                                                                                                                                                                                                                                                                                        |   |                    |              |                    |                    |                 |   |                    |                  |                                                     |                    |            |   |                    |         |   |                    |                             |   |                    |       |
| 6                                                                 | ancprovider_adm__6                                  | Traditional Birth Attendant                                                                                                   |                                                                                                                                                                                                                                                                                                                                                                                                                                                                                                                                        |   |                    |              |                    |                    |                 |   |                    |                  |                                                     |                    |            |   |                    |         |   |                    |                             |   |                    |       |
| 7                                                                 | ancprovider_adm__7                                  | Other                                                                                                                         |                                                                                                                                                                                                                                                                                                                                                                                                                                                                                                                                        |   |                    |              |                    |                    |                 |   |                    |                  |                                                     |                    |            |   |                    |         |   |                    |                             |   |                    |       |
| 78                                                                | [comment_adm]                                       | Comment                                                                                                                       | notes                                                                                                                                                                                                                                                                                                                                                                                                                                                                                                                                  |   |                    |              |                    |                    |                 |   |                    |                  |                                                     |                    |            |   |                    |         |   |                    |                             |   |                    |       |
| 79                                                                | [pregnancy_history_complete]                        | Section Header: <i>Form Status</i><br>Complete?                                                                               | dropdown<br><table border="1"> <tr><td>0</td><td>Incomplete</td></tr> <tr><td>1</td><td>Unverified</td></tr> <tr><td>2</td><td>Complete</td></tr> </table>                                                                                                                                                                                                                                                                                                                                                                             | 0 | Incomplete         | 1            | Unverified         | 2                  | Complete        |   |                    |                  |                                                     |                    |            |   |                    |         |   |                    |                             |   |                    |       |
| 0                                                                 | Incomplete                                          |                                                                                                                               |                                                                                                                                                                                                                                                                                                                                                                                                                                                                                                                                        |   |                    |              |                    |                    |                 |   |                    |                  |                                                     |                    |            |   |                    |         |   |                    |                             |   |                    |       |
| 1                                                                 | Unverified                                          |                                                                                                                               |                                                                                                                                                                                                                                                                                                                                                                                                                                                                                                                                        |   |                    |              |                    |                    |                 |   |                    |                  |                                                     |                    |            |   |                    |         |   |                    |                             |   |                    |       |
| 2                                                                 | Complete                                            |                                                                                                                               |                                                                                                                                                                                                                                                                                                                                                                                                                                                                                                                                        |   |                    |              |                    |                    |                 |   |                    |                  |                                                     |                    |            |   |                    |         |   |                    |                             |   |                    |       |
| Instrument: <b>4. SES and Demographics</b> (ses_and_demographics) |                                                     |                                                                                                                               |                                                                                                                                                                                                                                                                                                                                                                                                                                                                                                                                        |   |                    |              |                    |                    |                 |   |                    |                  |                                                     |                    |            |   |                    |         |   |                    |                             |   |                    |       |
| 80                                                                | [housenum_ses]                                      | Section Header: <i>SES and Demographics</i><br>How many people will be living in your household (including you AND new baby)? | text (integer, Min: 0, Max: 25)                                                                                                                                                                                                                                                                                                                                                                                                                                                                                                        |   |                    |              |                    |                    |                 |   |                    |                  |                                                     |                    |            |   |                    |         |   |                    |                             |   |                    |       |
| 81                                                                | [numchild_ses]                                      | How many children are you living with in your household (including the new baby)?                                             | text (integer, Min: 0, Max: 15)                                                                                                                                                                                                                                                                                                                                                                                                                                                                                                        |   |                    |              |                    |                    |                 |   |                    |                  |                                                     |                    |            |   |                    |         |   |                    |                             |   |                    |       |
| 82                                                                | [marry_ses]                                         | What is your current marital status                                                                                           | dropdown<br><table border="1"> <tr><td>1</td><td>Married monogamous</td></tr> <tr><td>2</td><td>Married polygamous</td></tr> <tr><td>3</td><td>Single</td></tr> <tr><td>4</td><td>Separated/divorced</td></tr> <tr><td>5</td><td>Widowed</td></tr> </table>                                                                                                                                                                                                                                                                            | 1 | Married monogamous | 2            | Married polygamous | 3                  | Single          | 4 | Separated/divorced | 5                | Widowed                                             |                    |            |   |                    |         |   |                    |                             |   |                    |       |
| 1                                                                 | Married monogamous                                  |                                                                                                                               |                                                                                                                                                                                                                                                                                                                                                                                                                                                                                                                                        |   |                    |              |                    |                    |                 |   |                    |                  |                                                     |                    |            |   |                    |         |   |                    |                             |   |                    |       |
| 2                                                                 | Married polygamous                                  |                                                                                                                               |                                                                                                                                                                                                                                                                                                                                                                                                                                                                                                                                        |   |                    |              |                    |                    |                 |   |                    |                  |                                                     |                    |            |   |                    |         |   |                    |                             |   |                    |       |
| 3                                                                 | Single                                              |                                                                                                                               |                                                                                                                                                                                                                                                                                                                                                                                                                                                                                                                                        |   |                    |              |                    |                    |                 |   |                    |                  |                                                     |                    |            |   |                    |         |   |                    |                             |   |                    |       |
| 4                                                                 | Separated/divorced                                  |                                                                                                                               |                                                                                                                                                                                                                                                                                                                                                                                                                                                                                                                                        |   |                    |              |                    |                    |                 |   |                    |                  |                                                     |                    |            |   |                    |         |   |                    |                             |   |                    |       |
| 5                                                                 | Widowed                                             |                                                                                                                               |                                                                                                                                                                                                                                                                                                                                                                                                                                                                                                                                        |   |                    |              |                    |                    |                 |   |                    |                  |                                                     |                    |            |   |                    |         |   |                    |                             |   |                    |       |
| 83                                                                | [livfather_ses]                                     | Do you live with the father of this baby?                                                                                     | yesno<br><table border="1"> <tr><td>1</td><td>Yes</td></tr> <tr><td>0</td><td>No</td></tr> </table>                                                                                                                                                                                                                                                                                                                                                                                                                                    | 1 | Yes                | 0            | No                 |                    |                 |   |                    |                  |                                                     |                    |            |   |                    |         |   |                    |                             |   |                    |       |
| 1                                                                 | Yes                                                 |                                                                                                                               |                                                                                                                                                                                                                                                                                                                                                                                                                                                                                                                                        |   |                    |              |                    |                    |                 |   |                    |                  |                                                     |                    |            |   |                    |         |   |                    |                             |   |                    |       |
| 0                                                                 | No                                                  |                                                                                                                               |                                                                                                                                                                                                                                                                                                                                                                                                                                                                                                                                        |   |                    |              |                    |                    |                 |   |                    |                  |                                                     |                    |            |   |                    |         |   |                    |                             |   |                    |       |
| 84                                                                | [schoolyrs_ses]                                     | What is the highest level of education you (mother) have completed?                                                           | dropdown<br><table border="1"> <tr><td>1</td><td>No school</td></tr> <tr><td>2</td><td>&lt;= P3</td></tr> <tr><td>3</td><td>P4-P7</td></tr> <tr><td>4</td><td>S1-S6</td></tr> <tr><td>5</td><td>Post secondary (including post S4 technical school)</td></tr> <tr><td>6</td><td>Don't know</td></tr> </table>                                                                                                                                                                                                                          | 1 | No school          | 2            | <= P3              | 3                  | P4-P7           | 4 | S1-S6              | 5                | Post secondary (including post S4 technical school) | 6                  | Don't know |   |                    |         |   |                    |                             |   |                    |       |
| 1                                                                 | No school                                           |                                                                                                                               |                                                                                                                                                                                                                                                                                                                                                                                                                                                                                                                                        |   |                    |              |                    |                    |                 |   |                    |                  |                                                     |                    |            |   |                    |         |   |                    |                             |   |                    |       |
| 2                                                                 | <= P3                                               |                                                                                                                               |                                                                                                                                                                                                                                                                                                                                                                                                                                                                                                                                        |   |                    |              |                    |                    |                 |   |                    |                  |                                                     |                    |            |   |                    |         |   |                    |                             |   |                    |       |
| 3                                                                 | P4-P7                                               |                                                                                                                               |                                                                                                                                                                                                                                                                                                                                                                                                                                                                                                                                        |   |                    |              |                    |                    |                 |   |                    |                  |                                                     |                    |            |   |                    |         |   |                    |                             |   |                    |       |
| 4                                                                 | S1-S6                                               |                                                                                                                               |                                                                                                                                                                                                                                                                                                                                                                                                                                                                                                                                        |   |                    |              |                    |                    |                 |   |                    |                  |                                                     |                    |            |   |                    |         |   |                    |                             |   |                    |       |
| 5                                                                 | Post secondary (including post S4 technical school) |                                                                                                                               |                                                                                                                                                                                                                                                                                                                                                                                                                                                                                                                                        |   |                    |              |                    |                    |                 |   |                    |                  |                                                     |                    |            |   |                    |         |   |                    |                             |   |                    |       |
| 6                                                                 | Don't know                                          |                                                                                                                               |                                                                                                                                                                                                                                                                                                                                                                                                                                                                                                                                        |   |                    |              |                    |                    |                 |   |                    |                  |                                                     |                    |            |   |                    |         |   |                    |                             |   |                    |       |

|    |                                                                                                                                              |                                                                                                                                                      |                                                                                                                                                                                                                                                                                                                                                                                                                                                                                                                                                                                                                                                                                           |   |                      |                                            |          |                      |                                       |   |                      |                                          |           |                      |               |    |                       |               |       |                     |                    |    |                     |                      |   |                     |      |   |                     |       |
|----|----------------------------------------------------------------------------------------------------------------------------------------------|------------------------------------------------------------------------------------------------------------------------------------------------------|-------------------------------------------------------------------------------------------------------------------------------------------------------------------------------------------------------------------------------------------------------------------------------------------------------------------------------------------------------------------------------------------------------------------------------------------------------------------------------------------------------------------------------------------------------------------------------------------------------------------------------------------------------------------------------------------|---|----------------------|--------------------------------------------|----------|----------------------|---------------------------------------|---|----------------------|------------------------------------------|-----------|----------------------|---------------|----|-----------------------|---------------|-------|---------------------|--------------------|----|---------------------|----------------------|---|---------------------|------|---|---------------------|-------|
| 85 | [nutri_adm]                                                                                                                                  | Section Header: <i>SES Index Questions</i><br>During your pregnancy, did you or any household member have to eat less food than you felt you needed? | dropdown<br><table border="1"> <tr><td>1</td><td>Yes</td></tr> <tr><td>2</td><td>No</td></tr> <tr><td>99</td><td>Not Sure</td></tr> </table>                                                                                                                                                                                                                                                                                                                                                                                                                                                                                                                                              | 1 | Yes                  | 2                                          | No       | 99                   | Not Sure                              |   |                      |                                          |           |                      |               |    |                       |               |       |                     |                    |    |                     |                      |   |                     |      |   |                     |       |
| 1  | Yes                                                                                                                                          |                                                                                                                                                      |                                                                                                                                                                                                                                                                                                                                                                                                                                                                                                                                                                                                                                                                                           |   |                      |                                            |          |                      |                                       |   |                      |                                          |           |                      |               |    |                       |               |       |                     |                    |    |                     |                      |   |                     |      |   |                     |       |
| 2  | No                                                                                                                                           |                                                                                                                                                      |                                                                                                                                                                                                                                                                                                                                                                                                                                                                                                                                                                                                                                                                                           |   |                      |                                            |          |                      |                                       |   |                      |                                          |           |                      |               |    |                       |               |       |                     |                    |    |                     |                      |   |                     |      |   |                     |       |
| 99 | Not Sure                                                                                                                                     |                                                                                                                                                      |                                                                                                                                                                                                                                                                                                                                                                                                                                                                                                                                                                                                                                                                                           |   |                      |                                            |          |                      |                                       |   |                      |                                          |           |                      |               |    |                       |               |       |                     |                    |    |                     |                      |   |                     |      |   |                     |       |
| 86 | [sesindex_flooring]                                                                                                                          | Which types of flooring does ANY room in your home have (choose ALL that apply)?                                                                     | checkbox<br><table border="1"> <tr><td>1</td><td>sesindex_flooring__1</td><td>Earth/Dung/Sand</td></tr> <tr><td>2</td><td>sesindex_flooring__2</td><td>Temporary carpet</td></tr> <tr><td>3</td><td>sesindex_flooring__3</td><td>Permanent flooring (tile, finished wood)</td></tr> <tr><td>4</td><td>sesindex_flooring__4</td><td>Cement</td></tr> <tr><td>98</td><td>sesindex_flooring__98</td><td>Other</td></tr> </table>                                                                                                                                                                                                                                                             | 1 | sesindex_flooring__1 | Earth/Dung/Sand                            | 2        | sesindex_flooring__2 | Temporary carpet                      | 3 | sesindex_flooring__3 | Permanent flooring (tile, finished wood) | 4         | sesindex_flooring__4 | Cement        | 98 | sesindex_flooring__98 | Other         |       |                     |                    |    |                     |                      |   |                     |      |   |                     |       |
| 1  | sesindex_flooring__1                                                                                                                         | Earth/Dung/Sand                                                                                                                                      |                                                                                                                                                                                                                                                                                                                                                                                                                                                                                                                                                                                                                                                                                           |   |                      |                                            |          |                      |                                       |   |                      |                                          |           |                      |               |    |                       |               |       |                     |                    |    |                     |                      |   |                     |      |   |                     |       |
| 2  | sesindex_flooring__2                                                                                                                         | Temporary carpet                                                                                                                                     |                                                                                                                                                                                                                                                                                                                                                                                                                                                                                                                                                                                                                                                                                           |   |                      |                                            |          |                      |                                       |   |                      |                                          |           |                      |               |    |                       |               |       |                     |                    |    |                     |                      |   |                     |      |   |                     |       |
| 3  | sesindex_flooring__3                                                                                                                         | Permanent flooring (tile, finished wood)                                                                                                             |                                                                                                                                                                                                                                                                                                                                                                                                                                                                                                                                                                                                                                                                                           |   |                      |                                            |          |                      |                                       |   |                      |                                          |           |                      |               |    |                       |               |       |                     |                    |    |                     |                      |   |                     |      |   |                     |       |
| 4  | sesindex_flooring__4                                                                                                                         | Cement                                                                                                                                               |                                                                                                                                                                                                                                                                                                                                                                                                                                                                                                                                                                                                                                                                                           |   |                      |                                            |          |                      |                                       |   |                      |                                          |           |                      |               |    |                       |               |       |                     |                    |    |                     |                      |   |                     |      |   |                     |       |
| 98 | sesindex_flooring__98                                                                                                                        | Other                                                                                                                                                |                                                                                                                                                                                                                                                                                                                                                                                                                                                                                                                                                                                                                                                                                           |   |                      |                                            |          |                      |                                       |   |                      |                                          |           |                      |               |    |                       |               |       |                     |                    |    |                     |                      |   |                     |      |   |                     |       |
| 87 | [sesindex_toilet]                                                                                                                            | What kind of toilet do members of your household usually use?                                                                                        | checkbox<br><table border="1"> <tr><td>1</td><td>sesindex_toilet__1</td><td>Flush toilet system (sitting or squatting)</td></tr> <tr><td>2</td><td>sesindex_toilet__2</td><td>Ventilated Improved Pit (VIP) Latrine</td></tr> <tr><td>3</td><td>sesindex_toilet__3</td><td>Composting toilet</td></tr> <tr><td>4</td><td>sesindex_toilet__4</td><td>Pit latrine</td></tr> <tr><td>5</td><td>sesindex_toilet__5</td><td>Bucket toilet</td></tr> <tr><td>6</td><td>sesindex_toilet__6</td><td>No toilet</td></tr> <tr><td>98</td><td>sesindex_toilet__98</td><td>Other</td></tr> </table>                                                                                                   | 1 | sesindex_toilet__1   | Flush toilet system (sitting or squatting) | 2        | sesindex_toilet__2   | Ventilated Improved Pit (VIP) Latrine | 3 | sesindex_toilet__3   | Composting toilet                        | 4         | sesindex_toilet__4   | Pit latrine   | 5  | sesindex_toilet__5    | Bucket toilet | 6     | sesindex_toilet__6  | No toilet          | 98 | sesindex_toilet__98 | Other                |   |                     |      |   |                     |       |
| 1  | sesindex_toilet__1                                                                                                                           | Flush toilet system (sitting or squatting)                                                                                                           |                                                                                                                                                                                                                                                                                                                                                                                                                                                                                                                                                                                                                                                                                           |   |                      |                                            |          |                      |                                       |   |                      |                                          |           |                      |               |    |                       |               |       |                     |                    |    |                     |                      |   |                     |      |   |                     |       |
| 2  | sesindex_toilet__2                                                                                                                           | Ventilated Improved Pit (VIP) Latrine                                                                                                                |                                                                                                                                                                                                                                                                                                                                                                                                                                                                                                                                                                                                                                                                                           |   |                      |                                            |          |                      |                                       |   |                      |                                          |           |                      |               |    |                       |               |       |                     |                    |    |                     |                      |   |                     |      |   |                     |       |
| 3  | sesindex_toilet__3                                                                                                                           | Composting toilet                                                                                                                                    |                                                                                                                                                                                                                                                                                                                                                                                                                                                                                                                                                                                                                                                                                           |   |                      |                                            |          |                      |                                       |   |                      |                                          |           |                      |               |    |                       |               |       |                     |                    |    |                     |                      |   |                     |      |   |                     |       |
| 4  | sesindex_toilet__4                                                                                                                           | Pit latrine                                                                                                                                          |                                                                                                                                                                                                                                                                                                                                                                                                                                                                                                                                                                                                                                                                                           |   |                      |                                            |          |                      |                                       |   |                      |                                          |           |                      |               |    |                       |               |       |                     |                    |    |                     |                      |   |                     |      |   |                     |       |
| 5  | sesindex_toilet__5                                                                                                                           | Bucket toilet                                                                                                                                        |                                                                                                                                                                                                                                                                                                                                                                                                                                                                                                                                                                                                                                                                                           |   |                      |                                            |          |                      |                                       |   |                      |                                          |           |                      |               |    |                       |               |       |                     |                    |    |                     |                      |   |                     |      |   |                     |       |
| 6  | sesindex_toilet__6                                                                                                                           | No toilet                                                                                                                                            |                                                                                                                                                                                                                                                                                                                                                                                                                                                                                                                                                                                                                                                                                           |   |                      |                                            |          |                      |                                       |   |                      |                                          |           |                      |               |    |                       |               |       |                     |                    |    |                     |                      |   |                     |      |   |                     |       |
| 98 | sesindex_toilet__98                                                                                                                          | Other                                                                                                                                                |                                                                                                                                                                                                                                                                                                                                                                                                                                                                                                                                                                                                                                                                                           |   |                      |                                            |          |                      |                                       |   |                      |                                          |           |                      |               |    |                       |               |       |                     |                    |    |                     |                      |   |                     |      |   |                     |       |
| 88 | [sesindex_toiletshared]<br>Show the field ONLY if:<br>[sesindex_toilet(1)] = "1" OR [sesindex_toilet(2)] = "1" OR [sesindex_toilet(3)] = "1" | Do you share this toilet with anyone outside your household (i.e. those NOT living together with you)?                                               | yesno<br><table border="1"> <tr><td>1</td><td>Yes</td></tr> <tr><td>0</td><td>No</td></tr> </table>                                                                                                                                                                                                                                                                                                                                                                                                                                                                                                                                                                                       | 1 | Yes                  | 0                                          | No       |                      |                                       |   |                      |                                          |           |                      |               |    |                       |               |       |                     |                    |    |                     |                      |   |                     |      |   |                     |       |
| 1  | Yes                                                                                                                                          |                                                                                                                                                      |                                                                                                                                                                                                                                                                                                                                                                                                                                                                                                                                                                                                                                                                                           |   |                      |                                            |          |                      |                                       |   |                      |                                          |           |                      |               |    |                       |               |       |                     |                    |    |                     |                      |   |                     |      |   |                     |       |
| 0  | No                                                                                                                                           |                                                                                                                                                      |                                                                                                                                                                                                                                                                                                                                                                                                                                                                                                                                                                                                                                                                                           |   |                      |                                            |          |                      |                                       |   |                      |                                          |           |                      |               |    |                       |               |       |                     |                    |    |                     |                      |   |                     |      |   |                     |       |
| 89 | [sesindex_cooking]                                                                                                                           | Which of the following energy sources for cooking food do you use (choose all that apply)?                                                           | checkbox<br><table border="1"> <tr><td>1</td><td>sesindex_cooking__1</td><td>Electricity</td></tr> <tr><td>2</td><td>sesindex_cooking__2</td><td>Petrol/diesel/propane</td></tr> <tr><td>3</td><td>sesindex_cooking__3</td><td>Kerosene/paraffin</td></tr> <tr><td>4</td><td>sesindex_cooking__4</td><td>Coal/charcoal</td></tr> <tr><td>5</td><td>sesindex_cooking__5</td><td>Wood</td></tr> <tr><td>6</td><td>sesindex_cooking__6</td><td>Straw/shrubs/grass</td></tr> <tr><td>7</td><td>sesindex_cooking__7</td><td>Biomass or woodchips</td></tr> <tr><td>8</td><td>sesindex_cooking__8</td><td>Dung</td></tr> <tr><td>9</td><td>sesindex_cooking__9</td><td>Other</td></tr> </table> | 1 | sesindex_cooking__1  | Electricity                                | 2        | sesindex_cooking__2  | Petrol/diesel/propane                 | 3 | sesindex_cooking__3  | Kerosene/paraffin                        | 4         | sesindex_cooking__4  | Coal/charcoal | 5  | sesindex_cooking__5   | Wood          | 6     | sesindex_cooking__6 | Straw/shrubs/grass | 7  | sesindex_cooking__7 | Biomass or woodchips | 8 | sesindex_cooking__8 | Dung | 9 | sesindex_cooking__9 | Other |
| 1  | sesindex_cooking__1                                                                                                                          | Electricity                                                                                                                                          |                                                                                                                                                                                                                                                                                                                                                                                                                                                                                                                                                                                                                                                                                           |   |                      |                                            |          |                      |                                       |   |                      |                                          |           |                      |               |    |                       |               |       |                     |                    |    |                     |                      |   |                     |      |   |                     |       |
| 2  | sesindex_cooking__2                                                                                                                          | Petrol/diesel/propane                                                                                                                                |                                                                                                                                                                                                                                                                                                                                                                                                                                                                                                                                                                                                                                                                                           |   |                      |                                            |          |                      |                                       |   |                      |                                          |           |                      |               |    |                       |               |       |                     |                    |    |                     |                      |   |                     |      |   |                     |       |
| 3  | sesindex_cooking__3                                                                                                                          | Kerosene/paraffin                                                                                                                                    |                                                                                                                                                                                                                                                                                                                                                                                                                                                                                                                                                                                                                                                                                           |   |                      |                                            |          |                      |                                       |   |                      |                                          |           |                      |               |    |                       |               |       |                     |                    |    |                     |                      |   |                     |      |   |                     |       |
| 4  | sesindex_cooking__4                                                                                                                          | Coal/charcoal                                                                                                                                        |                                                                                                                                                                                                                                                                                                                                                                                                                                                                                                                                                                                                                                                                                           |   |                      |                                            |          |                      |                                       |   |                      |                                          |           |                      |               |    |                       |               |       |                     |                    |    |                     |                      |   |                     |      |   |                     |       |
| 5  | sesindex_cooking__5                                                                                                                          | Wood                                                                                                                                                 |                                                                                                                                                                                                                                                                                                                                                                                                                                                                                                                                                                                                                                                                                           |   |                      |                                            |          |                      |                                       |   |                      |                                          |           |                      |               |    |                       |               |       |                     |                    |    |                     |                      |   |                     |      |   |                     |       |
| 6  | sesindex_cooking__6                                                                                                                          | Straw/shrubs/grass                                                                                                                                   |                                                                                                                                                                                                                                                                                                                                                                                                                                                                                                                                                                                                                                                                                           |   |                      |                                            |          |                      |                                       |   |                      |                                          |           |                      |               |    |                       |               |       |                     |                    |    |                     |                      |   |                     |      |   |                     |       |
| 7  | sesindex_cooking__7                                                                                                                          | Biomass or woodchips                                                                                                                                 |                                                                                                                                                                                                                                                                                                                                                                                                                                                                                                                                                                                                                                                                                           |   |                      |                                            |          |                      |                                       |   |                      |                                          |           |                      |               |    |                       |               |       |                     |                    |    |                     |                      |   |                     |      |   |                     |       |
| 8  | sesindex_cooking__8                                                                                                                          | Dung                                                                                                                                                 |                                                                                                                                                                                                                                                                                                                                                                                                                                                                                                                                                                                                                                                                                           |   |                      |                                            |          |                      |                                       |   |                      |                                          |           |                      |               |    |                       |               |       |                     |                    |    |                     |                      |   |                     |      |   |                     |       |
| 9  | sesindex_cooking__9                                                                                                                          | Other                                                                                                                                                |                                                                                                                                                                                                                                                                                                                                                                                                                                                                                                                                                                                                                                                                                           |   |                      |                                            |          |                      |                                       |   |                      |                                          |           |                      |               |    |                       |               |       |                     |                    |    |                     |                      |   |                     |      |   |                     |       |
| 90 | [sesindex_safewater]                                                                                                                         | What is the main source of drinking water for members of your household?                                                                             | dropdown<br><table border="1"> <tr><td>1</td><td>Piped water</td></tr> <tr><td>2</td><td>Borehole</td></tr> <tr><td>3</td><td>Protected spring</td></tr> <tr><td>4</td><td>Well/dam</td></tr> <tr><td>5</td><td>Rainwater</td></tr> <tr><td>6</td><td>River/lake</td></tr> <tr><td>7</td><td>Bottled water</td></tr> <tr><td>98</td><td>Other</td></tr> </table>                                                                                                                                                                                                                                                                                                                          | 1 | Piped water          | 2                                          | Borehole | 3                    | Protected spring                      | 4 | Well/dam             | 5                                        | Rainwater | 6                    | River/lake    | 7  | Bottled water         | 98            | Other |                     |                    |    |                     |                      |   |                     |      |   |                     |       |
| 1  | Piped water                                                                                                                                  |                                                                                                                                                      |                                                                                                                                                                                                                                                                                                                                                                                                                                                                                                                                                                                                                                                                                           |   |                      |                                            |          |                      |                                       |   |                      |                                          |           |                      |               |    |                       |               |       |                     |                    |    |                     |                      |   |                     |      |   |                     |       |
| 2  | Borehole                                                                                                                                     |                                                                                                                                                      |                                                                                                                                                                                                                                                                                                                                                                                                                                                                                                                                                                                                                                                                                           |   |                      |                                            |          |                      |                                       |   |                      |                                          |           |                      |               |    |                       |               |       |                     |                    |    |                     |                      |   |                     |      |   |                     |       |
| 3  | Protected spring                                                                                                                             |                                                                                                                                                      |                                                                                                                                                                                                                                                                                                                                                                                                                                                                                                                                                                                                                                                                                           |   |                      |                                            |          |                      |                                       |   |                      |                                          |           |                      |               |    |                       |               |       |                     |                    |    |                     |                      |   |                     |      |   |                     |       |
| 4  | Well/dam                                                                                                                                     |                                                                                                                                                      |                                                                                                                                                                                                                                                                                                                                                                                                                                                                                                                                                                                                                                                                                           |   |                      |                                            |          |                      |                                       |   |                      |                                          |           |                      |               |    |                       |               |       |                     |                    |    |                     |                      |   |                     |      |   |                     |       |
| 5  | Rainwater                                                                                                                                    |                                                                                                                                                      |                                                                                                                                                                                                                                                                                                                                                                                                                                                                                                                                                                                                                                                                                           |   |                      |                                            |          |                      |                                       |   |                      |                                          |           |                      |               |    |                       |               |       |                     |                    |    |                     |                      |   |                     |      |   |                     |       |
| 6  | River/lake                                                                                                                                   |                                                                                                                                                      |                                                                                                                                                                                                                                                                                                                                                                                                                                                                                                                                                                                                                                                                                           |   |                      |                                            |          |                      |                                       |   |                      |                                          |           |                      |               |    |                       |               |       |                     |                    |    |                     |                      |   |                     |      |   |                     |       |
| 7  | Bottled water                                                                                                                                |                                                                                                                                                      |                                                                                                                                                                                                                                                                                                                                                                                                                                                                                                                                                                                                                                                                                           |   |                      |                                            |          |                      |                                       |   |                      |                                          |           |                      |               |    |                       |               |       |                     |                    |    |                     |                      |   |                     |      |   |                     |       |
| 98 | Other                                                                                                                                        |                                                                                                                                                      |                                                                                                                                                                                                                                                                                                                                                                                                                                                                                                                                                                                                                                                                                           |   |                      |                                            |          |                      |                                       |   |                      |                                          |           |                      |               |    |                       |               |       |                     |                    |    |                     |                      |   |                     |      |   |                     |       |
| 91 | [sesindex_otherwater]<br>Show the field ONLY if:<br>[sesindex_safewater] = '98'                                                              | Specify other:                                                                                                                                       | text                                                                                                                                                                                                                                                                                                                                                                                                                                                                                                                                                                                                                                                                                      |   |                      |                                            |          |                      |                                       |   |                      |                                          |           |                      |               |    |                       |               |       |                     |                    |    |                     |                      |   |                     |      |   |                     |       |
| 92 | [sesindex_safewaterdistance]                                                                                                                 | Does it take you more than 30 minutes to walk from your home to the water source and back?                                                           | yesno<br><table border="1"> <tr><td>1</td><td>Yes</td></tr> <tr><td>0</td><td>No</td></tr> </table>                                                                                                                                                                                                                                                                                                                                                                                                                                                                                                                                                                                       | 1 | Yes                  | 0                                          | No       |                      |                                       |   |                      |                                          |           |                      |               |    |                       |               |       |                     |                    |    |                     |                      |   |                     |      |   |                     |       |
| 1  | Yes                                                                                                                                          |                                                                                                                                                      |                                                                                                                                                                                                                                                                                                                                                                                                                                                                                                                                                                                                                                                                                           |   |                      |                                            |          |                      |                                       |   |                      |                                          |           |                      |               |    |                       |               |       |                     |                    |    |                     |                      |   |                     |      |   |                     |       |
| 0  | No                                                                                                                                           |                                                                                                                                                      |                                                                                                                                                                                                                                                                                                                                                                                                                                                                                                                                                                                                                                                                                           |   |                      |                                            |          |                      |                                       |   |                      |                                          |           |                      |               |    |                       |               |       |                     |                    |    |                     |                      |   |                     |      |   |                     |       |

|                                                             |                                                          |                                                                       |                                                                                                                                                                                                                                                                                                                                                                                                                                                                                              |   |                     |                             |                                      |                     |                         |   |                            |            |            |                     |                |    |                     |                |    |                      |      |
|-------------------------------------------------------------|----------------------------------------------------------|-----------------------------------------------------------------------|----------------------------------------------------------------------------------------------------------------------------------------------------------------------------------------------------------------------------------------------------------------------------------------------------------------------------------------------------------------------------------------------------------------------------------------------------------------------------------------------|---|---------------------|-----------------------------|--------------------------------------|---------------------|-------------------------|---|----------------------------|------------|------------|---------------------|----------------|----|---------------------|----------------|----|----------------------|------|
| 93                                                          | [sesindex_assets]                                        | Does your household have any of the following items:                  | checkbox<br><table border="1"> <tr> <td>1</td> <td>sesindex_assets__1</td> <td>Electricity (from the grid)</td> </tr> <tr> <td>2</td> <td>sesindex_assets__2</td> <td>A television</td> </tr> <tr> <td>3</td> <td>sesindex_assets__3</td> <td>A computer</td> </tr> <tr> <td>4</td> <td>sesindex_assets__4</td> <td>A refrigerator</td> </tr> <tr> <td>99</td> <td>sesindex_assets__99</td> <td>None</td> </tr> </table>                                                                     | 1 | sesindex_assets__1  | Electricity (from the grid) | 2                                    | sesindex_assets__2  | A television            | 3 | sesindex_assets__3         | A computer | 4          | sesindex_assets__4  | A refrigerator | 99 | sesindex_assets__99 | None           |    |                      |      |
| 1                                                           | sesindex_assets__1                                       | Electricity (from the grid)                                           |                                                                                                                                                                                                                                                                                                                                                                                                                                                                                              |   |                     |                             |                                      |                     |                         |   |                            |            |            |                     |                |    |                     |                |    |                      |      |
| 2                                                           | sesindex_assets__2                                       | A television                                                          |                                                                                                                                                                                                                                                                                                                                                                                                                                                                                              |   |                     |                             |                                      |                     |                         |   |                            |            |            |                     |                |    |                     |                |    |                      |      |
| 3                                                           | sesindex_assets__3                                       | A computer                                                            |                                                                                                                                                                                                                                                                                                                                                                                                                                                                                              |   |                     |                             |                                      |                     |                         |   |                            |            |            |                     |                |    |                     |                |    |                      |      |
| 4                                                           | sesindex_assets__4                                       | A refrigerator                                                        |                                                                                                                                                                                                                                                                                                                                                                                                                                                                                              |   |                     |                             |                                      |                     |                         |   |                            |            |            |                     |                |    |                     |                |    |                      |      |
| 99                                                          | sesindex_assets__99                                      | None                                                                  |                                                                                                                                                                                                                                                                                                                                                                                                                                                                                              |   |                     |                             |                                      |                     |                         |   |                            |            |            |                     |                |    |                     |                |    |                      |      |
| 94                                                          | [sesindex_assets2]                                       | Do you (or someone in your household) own any of the following items: | checkbox<br><table border="1"> <tr> <td>1</td> <td>sesindex_assets2__1</td> <td>A smart phone</td> </tr> <tr> <td>2</td> <td>sesindex_assets2__2</td> <td>A non-smart phone</td> </tr> <tr> <td>3</td> <td>sesindex_assets2__3</td> <td>A bicycle</td> </tr> <tr> <td>4</td> <td>sesindex_assets2__4</td> <td>A motorcycle</td> </tr> <tr> <td>5</td> <td>sesindex_assets2__5</td> <td>A car or truck</td> </tr> <tr> <td>99</td> <td>sesindex_assets2__99</td> <td>None</td> </tr> </table> | 1 | sesindex_assets2__1 | A smart phone               | 2                                    | sesindex_assets2__2 | A non-smart phone       | 3 | sesindex_assets2__3        | A bicycle  | 4          | sesindex_assets2__4 | A motorcycle   | 5  | sesindex_assets2__5 | A car or truck | 99 | sesindex_assets2__99 | None |
| 1                                                           | sesindex_assets2__1                                      | A smart phone                                                         |                                                                                                                                                                                                                                                                                                                                                                                                                                                                                              |   |                     |                             |                                      |                     |                         |   |                            |            |            |                     |                |    |                     |                |    |                      |      |
| 2                                                           | sesindex_assets2__2                                      | A non-smart phone                                                     |                                                                                                                                                                                                                                                                                                                                                                                                                                                                                              |   |                     |                             |                                      |                     |                         |   |                            |            |            |                     |                |    |                     |                |    |                      |      |
| 3                                                           | sesindex_assets2__3                                      | A bicycle                                                             |                                                                                                                                                                                                                                                                                                                                                                                                                                                                                              |   |                     |                             |                                      |                     |                         |   |                            |            |            |                     |                |    |                     |                |    |                      |      |
| 4                                                           | sesindex_assets2__4                                      | A motorcycle                                                          |                                                                                                                                                                                                                                                                                                                                                                                                                                                                                              |   |                     |                             |                                      |                     |                         |   |                            |            |            |                     |                |    |                     |                |    |                      |      |
| 5                                                           | sesindex_assets2__5                                      | A car or truck                                                        |                                                                                                                                                                                                                                                                                                                                                                                                                                                                                              |   |                     |                             |                                      |                     |                         |   |                            |            |            |                     |                |    |                     |                |    |                      |      |
| 99                                                          | sesindex_assets2__99                                     | None                                                                  |                                                                                                                                                                                                                                                                                                                                                                                                                                                                                              |   |                     |                             |                                      |                     |                         |   |                            |            |            |                     |                |    |                     |                |    |                      |      |
| 95                                                          | [sesindex_room]                                          | How many rooms does your home contain?                                | radio<br><table border="1"> <tr> <td>1</td> <td>One</td> </tr> <tr> <td>2</td> <td>Two</td> </tr> <tr> <td>3</td> <td>Three</td> </tr> <tr> <td>4</td> <td>More than three</td> </tr> </table>                                                                                                                                                                                                                                                                                               | 1 | One                 | 2                           | Two                                  | 3                   | Three                   | 4 | More than three            |            |            |                     |                |    |                     |                |    |                      |      |
| 1                                                           | One                                                      |                                                                       |                                                                                                                                                                                                                                                                                                                                                                                                                                                                                              |   |                     |                             |                                      |                     |                         |   |                            |            |            |                     |                |    |                     |                |    |                      |      |
| 2                                                           | Two                                                      |                                                                       |                                                                                                                                                                                                                                                                                                                                                                                                                                                                                              |   |                     |                             |                                      |                     |                         |   |                            |            |            |                     |                |    |                     |                |    |                      |      |
| 3                                                           | Three                                                    |                                                                       |                                                                                                                                                                                                                                                                                                                                                                                                                                                                                              |   |                     |                             |                                      |                     |                         |   |                            |            |            |                     |                |    |                     |                |    |                      |      |
| 4                                                           | More than three                                          |                                                                       |                                                                                                                                                                                                                                                                                                                                                                                                                                                                                              |   |                     |                             |                                      |                     |                         |   |                            |            |            |                     |                |    |                     |                |    |                      |      |
| 96                                                          | [child_death_ses]                                        | Have you had any children who have died?                              | yesno<br><table border="1"> <tr> <td>1</td> <td>Yes</td> </tr> <tr> <td>0</td> <td>No</td> </tr> </table>                                                                                                                                                                                                                                                                                                                                                                                    | 1 | Yes                 | 0                           | No                                   |                     |                         |   |                            |            |            |                     |                |    |                     |                |    |                      |      |
| 1                                                           | Yes                                                      |                                                                       |                                                                                                                                                                                                                                                                                                                                                                                                                                                                                              |   |                     |                             |                                      |                     |                         |   |                            |            |            |                     |                |    |                     |                |    |                      |      |
| 0                                                           | No                                                       |                                                                       |                                                                                                                                                                                                                                                                                                                                                                                                                                                                                              |   |                     |                             |                                      |                     |                         |   |                            |            |            |                     |                |    |                     |                |    |                      |      |
| 97                                                          | [comment_ses]                                            | Comment                                                               | notes                                                                                                                                                                                                                                                                                                                                                                                                                                                                                        |   |                     |                             |                                      |                     |                         |   |                            |            |            |                     |                |    |                     |                |    |                      |      |
| 98                                                          | [ses_and_demographics_complete]                          | Section Header: <i>Form Status</i><br>Complete?                       | dropdown<br><table border="1"> <tr> <td>0</td> <td>Incomplete</td> </tr> <tr> <td>1</td> <td>Unverified</td> </tr> <tr> <td>2</td> <td>Complete</td> </tr> </table>                                                                                                                                                                                                                                                                                                                          | 0 | Incomplete          | 1                           | Unverified                           | 2                   | Complete                |   |                            |            |            |                     |                |    |                     |                |    |                      |      |
| 0                                                           | Incomplete                                               |                                                                       |                                                                                                                                                                                                                                                                                                                                                                                                                                                                                              |   |                     |                             |                                      |                     |                         |   |                            |            |            |                     |                |    |                     |                |    |                      |      |
| 1                                                           | Unverified                                               |                                                                       |                                                                                                                                                                                                                                                                                                                                                                                                                                                                                              |   |                     |                             |                                      |                     |                         |   |                            |            |            |                     |                |    |                     |                |    |                      |      |
| 2                                                           | Complete                                                 |                                                                       |                                                                                                                                                                                                                                                                                                                                                                                                                                                                                              |   |                     |                             |                                      |                     |                         |   |                            |            |            |                     |                |    |                     |                |    |                      |      |
| Instrument: <b>5. Delivery Maternal</b> (delivery_maternal) |                                                          |                                                                       |                                                                                                                                                                                                                                                                                                                                                                                                                                                                                              |   |                     |                             |                                      |                     |                         |   |                            |            |            |                     |                |    |                     |                |    |                      |      |
| 99                                                          | [numbabe_del]                                            | How many babies were delivered?                                       | text (integer, Min: 1, Max: 3)                                                                                                                                                                                                                                                                                                                                                                                                                                                               |   |                     |                             |                                      |                     |                         |   |                            |            |            |                     |                |    |                     |                |    |                      |      |
| 100                                                         | [prom_del]                                               | Rupture of membranes more than 24hrs before delivery?                 | dropdown<br><table border="1"> <tr> <td>1</td> <td>Yes</td> </tr> <tr> <td>2</td> <td>No</td> </tr> <tr> <td>3</td> <td>Not sure</td> </tr> </table>                                                                                                                                                                                                                                                                                                                                         | 1 | Yes                 | 2                           | No                                   | 3                   | Not sure                |   |                            |            |            |                     |                |    |                     |                |    |                      |      |
| 1                                                           | Yes                                                      |                                                                       |                                                                                                                                                                                                                                                                                                                                                                                                                                                                                              |   |                     |                             |                                      |                     |                         |   |                            |            |            |                     |                |    |                     |                |    |                      |      |
| 2                                                           | No                                                       |                                                                       |                                                                                                                                                                                                                                                                                                                                                                                                                                                                                              |   |                     |                             |                                      |                     |                         |   |                            |            |            |                     |                |    |                     |                |    |                      |      |
| 3                                                           | Not sure                                                 |                                                                       |                                                                                                                                                                                                                                                                                                                                                                                                                                                                                              |   |                     |                             |                                      |                     |                         |   |                            |            |            |                     |                |    |                     |                |    |                      |      |
| 101                                                         | [rom_del]<br>Show the field ONLY if:<br>[prom_del] = '1' | For how many hours were membranes ruptured prior to delivery?         | dropdown<br><table border="1"> <tr> <td>1</td> <td>0 - 4 hours</td> </tr> <tr> <td>2</td> <td>4 - 8 hours</td> </tr> <tr> <td>3</td> <td>8 - 12 hours</td> </tr> <tr> <td>4</td> <td>12 - 24 hours</td> </tr> <tr> <td>5</td> <td>&gt; 24 hours</td> </tr> </table>                                                                                                                                                                                                                          | 1 | 0 - 4 hours         | 2                           | 4 - 8 hours                          | 3                   | 8 - 12 hours            | 4 | 12 - 24 hours              | 5          | > 24 hours |                     |                |    |                     |                |    |                      |      |
| 1                                                           | 0 - 4 hours                                              |                                                                       |                                                                                                                                                                                                                                                                                                                                                                                                                                                                                              |   |                     |                             |                                      |                     |                         |   |                            |            |            |                     |                |    |                     |                |    |                      |      |
| 2                                                           | 4 - 8 hours                                              |                                                                       |                                                                                                                                                                                                                                                                                                                                                                                                                                                                                              |   |                     |                             |                                      |                     |                         |   |                            |            |            |                     |                |    |                     |                |    |                      |      |
| 3                                                           | 8 - 12 hours                                             |                                                                       |                                                                                                                                                                                                                                                                                                                                                                                                                                                                                              |   |                     |                             |                                      |                     |                         |   |                            |            |            |                     |                |    |                     |                |    |                      |      |
| 4                                                           | 12 - 24 hours                                            |                                                                       |                                                                                                                                                                                                                                                                                                                                                                                                                                                                                              |   |                     |                             |                                      |                     |                         |   |                            |            |            |                     |                |    |                     |                |    |                      |      |
| 5                                                           | > 24 hours                                               |                                                                       |                                                                                                                                                                                                                                                                                                                                                                                                                                                                                              |   |                     |                             |                                      |                     |                         |   |                            |            |            |                     |                |    |                     |                |    |                      |      |
| 102                                                         | [deldate_del]                                            | Delivery date                                                         | text (date_dmy)                                                                                                                                                                                                                                                                                                                                                                                                                                                                              |   |                     |                             |                                      |                     |                         |   |                            |            |            |                     |                |    |                     |                |    |                      |      |
| 103                                                         | [delttime_del]                                           | Delivery time (USE 24 HOUR TIME - HH:MM)                              | text (time)                                                                                                                                                                                                                                                                                                                                                                                                                                                                                  |   |                     |                             |                                      |                     |                         |   |                            |            |            |                     |                |    |                     |                |    |                      |      |
| 104                                                         | [delmode_del]                                            | What was the mode of delivery?                                        | dropdown<br><table border="1"> <tr> <td>1</td> <td>Vaginal</td> </tr> <tr> <td>2</td> <td>Assisted vaginal (vacuum or forceps)</td> </tr> <tr> <td>3</td> <td>Caesarean (with labour)</td> </tr> <tr> <td>4</td> <td>Caesarean (without labour)</td> </tr> </table>                                                                                                                                                                                                                          | 1 | Vaginal             | 2                           | Assisted vaginal (vacuum or forceps) | 3                   | Caesarean (with labour) | 4 | Caesarean (without labour) |            |            |                     |                |    |                     |                |    |                      |      |
| 1                                                           | Vaginal                                                  |                                                                       |                                                                                                                                                                                                                                                                                                                                                                                                                                                                                              |   |                     |                             |                                      |                     |                         |   |                            |            |            |                     |                |    |                     |                |    |                      |      |
| 2                                                           | Assisted vaginal (vacuum or forceps)                     |                                                                       |                                                                                                                                                                                                                                                                                                                                                                                                                                                                                              |   |                     |                             |                                      |                     |                         |   |                            |            |            |                     |                |    |                     |                |    |                      |      |
| 3                                                           | Caesarean (with labour)                                  |                                                                       |                                                                                                                                                                                                                                                                                                                                                                                                                                                                                              |   |                     |                             |                                      |                     |                         |   |                            |            |            |                     |                |    |                     |                |    |                      |      |
| 4                                                           | Caesarean (without labour)                               |                                                                       |                                                                                                                                                                                                                                                                                                                                                                                                                                                                                              |   |                     |                             |                                      |                     |                         |   |                            |            |            |                     |                |    |                     |                |    |                      |      |
| 105                                                         | [episiotomy_del]                                         | Was the woman given an episiotomy?                                    | dropdown<br><table border="1"> <tr> <td>1</td> <td>Yes</td> </tr> <tr> <td>2</td> <td>No</td> </tr> <tr> <td>99</td> <td>Not sure</td> </tr> </table>                                                                                                                                                                                                                                                                                                                                        | 1 | Yes                 | 2                           | No                                   | 99                  | Not sure                |   |                            |            |            |                     |                |    |                     |                |    |                      |      |
| 1                                                           | Yes                                                      |                                                                       |                                                                                                                                                                                                                                                                                                                                                                                                                                                                                              |   |                     |                             |                                      |                     |                         |   |                            |            |            |                     |                |    |                     |                |    |                      |      |
| 2                                                           | No                                                       |                                                                       |                                                                                                                                                                                                                                                                                                                                                                                                                                                                                              |   |                     |                             |                                      |                     |                         |   |                            |            |            |                     |                |    |                     |                |    |                      |      |
| 99                                                          | Not sure                                                 |                                                                       |                                                                                                                                                                                                                                                                                                                                                                                                                                                                                              |   |                     |                             |                                      |                     |                         |   |                            |            |            |                     |                |    |                     |                |    |                      |      |



|     |                                                                     |                                                             |                                                                                                                                                                                                                                                                                                                                                                                                                                                                           |   |                  |                          |    |                  |                             |   |                  |                |   |                  |                |   |                  |          |    |                   |       |
|-----|---------------------------------------------------------------------|-------------------------------------------------------------|---------------------------------------------------------------------------------------------------------------------------------------------------------------------------------------------------------------------------------------------------------------------------------------------------------------------------------------------------------------------------------------------------------------------------------------------------------------------------|---|------------------|--------------------------|----|------------------|-----------------------------|---|------------------|----------------|---|------------------|----------------|---|------------------|----------|----|-------------------|-------|
| 106 | [tear_del]                                                          | Was there any noted vaginal or perineal tearing?            | dropdown<br><table border="1"> <tr><td>1</td><td>Yes</td></tr> <tr><td>2</td><td>No</td></tr> <tr><td>99</td><td>Not sure</td></tr> </table>                                                                                                                                                                                                                                                                                                                              | 1 | Yes              | 2                        | No | 99               | Not sure                    |   |                  |                |   |                  |                |   |                  |          |    |                   |       |
| 1   | Yes                                                                 |                                                             |                                                                                                                                                                                                                                                                                                                                                                                                                                                                           |   |                  |                          |    |                  |                             |   |                  |                |   |                  |                |   |                  |          |    |                   |       |
| 2   | No                                                                  |                                                             |                                                                                                                                                                                                                                                                                                                                                                                                                                                                           |   |                  |                          |    |                  |                             |   |                  |                |   |                  |                |   |                  |          |    |                   |       |
| 99  | Not sure                                                            |                                                             |                                                                                                                                                                                                                                                                                                                                                                                                                                                                           |   |                  |                          |    |                  |                             |   |                  |                |   |                  |                |   |                  |          |    |                   |       |
| 107 | [degreeteartear_del]<br>Show the field ONLY if:<br>[tear_del] = '1' | What was the recorded degree of tearing?                    | dropdown<br><table border="1"> <tr><td>1</td><td>1</td></tr> <tr><td>2</td><td>2</td></tr> <tr><td>3</td><td>3</td></tr> <tr><td>4</td><td>4</td></tr> </table>                                                                                                                                                                                                                                                                                                           | 1 | 1                | 2                        | 2  | 3                | 3                           | 4 | 4                |                |   |                  |                |   |                  |          |    |                   |       |
| 1   | 1                                                                   |                                                             |                                                                                                                                                                                                                                                                                                                                                                                                                                                                           |   |                  |                          |    |                  |                             |   |                  |                |   |                  |                |   |                  |          |    |                   |       |
| 2   | 2                                                                   |                                                             |                                                                                                                                                                                                                                                                                                                                                                                                                                                                           |   |                  |                          |    |                  |                             |   |                  |                |   |                  |                |   |                  |          |    |                   |       |
| 3   | 3                                                                   |                                                             |                                                                                                                                                                                                                                                                                                                                                                                                                                                                           |   |                  |                          |    |                  |                             |   |                  |                |   |                  |                |   |                  |          |    |                   |       |
| 4   | 4                                                                   |                                                             |                                                                                                                                                                                                                                                                                                                                                                                                                                                                           |   |                  |                          |    |                  |                             |   |                  |                |   |                  |                |   |                  |          |    |                   |       |
| 108 | [induce_del]                                                        | Was the start of labour induced?                            | dropdown<br><table border="1"> <tr><td>1</td><td>Yes</td></tr> <tr><td>2</td><td>No</td></tr> <tr><td>99</td><td>Not sure</td></tr> </table>                                                                                                                                                                                                                                                                                                                              | 1 | Yes              | 2                        | No | 99               | Not sure                    |   |                  |                |   |                  |                |   |                  |          |    |                   |       |
| 1   | Yes                                                                 |                                                             |                                                                                                                                                                                                                                                                                                                                                                                                                                                                           |   |                  |                          |    |                  |                             |   |                  |                |   |                  |                |   |                  |          |    |                   |       |
| 2   | No                                                                  |                                                             |                                                                                                                                                                                                                                                                                                                                                                                                                                                                           |   |                  |                          |    |                  |                             |   |                  |                |   |                  |                |   |                  |          |    |                   |       |
| 99  | Not sure                                                            |                                                             |                                                                                                                                                                                                                                                                                                                                                                                                                                                                           |   |                  |                          |    |                  |                             |   |                  |                |   |                  |                |   |                  |          |    |                   |       |
| 109 | [inductype_del]<br>Show the field ONLY if:<br>[induce_del] = '1'    | Which method of induction was used (select all that apply)? | checkbox<br><table border="1"> <tr><td>1</td><td>inductype_del__1</td><td>Membrane strip and sweep</td></tr> <tr><td>2</td><td>inductype_del__2</td><td>Manual rupture of membranes</td></tr> <tr><td>3</td><td>inductype_del__3</td><td>Foley catheter</td></tr> <tr><td>4</td><td>inductype_del__4</td><td>Prostaglandins</td></tr> <tr><td>5</td><td>inductype_del__5</td><td>Oxytocin</td></tr> <tr><td>98</td><td>inductype_del__98</td><td>Other</td></tr> </table> | 1 | inductype_del__1 | Membrane strip and sweep | 2  | inductype_del__2 | Manual rupture of membranes | 3 | inductype_del__3 | Foley catheter | 4 | inductype_del__4 | Prostaglandins | 5 | inductype_del__5 | Oxytocin | 98 | inductype_del__98 | Other |
| 1   | inductype_del__1                                                    | Membrane strip and sweep                                    |                                                                                                                                                                                                                                                                                                                                                                                                                                                                           |   |                  |                          |    |                  |                             |   |                  |                |   |                  |                |   |                  |          |    |                   |       |
| 2   | inductype_del__2                                                    | Manual rupture of membranes                                 |                                                                                                                                                                                                                                                                                                                                                                                                                                                                           |   |                  |                          |    |                  |                             |   |                  |                |   |                  |                |   |                  |          |    |                   |       |
| 3   | inductype_del__3                                                    | Foley catheter                                              |                                                                                                                                                                                                                                                                                                                                                                                                                                                                           |   |                  |                          |    |                  |                             |   |                  |                |   |                  |                |   |                  |          |    |                   |       |
| 4   | inductype_del__4                                                    | Prostaglandins                                              |                                                                                                                                                                                                                                                                                                                                                                                                                                                                           |   |                  |                          |    |                  |                             |   |                  |                |   |                  |                |   |                  |          |    |                   |       |
| 5   | inductype_del__5                                                    | Oxytocin                                                    |                                                                                                                                                                                                                                                                                                                                                                                                                                                                           |   |                  |                          |    |                  |                             |   |                  |                |   |                  |                |   |                  |          |    |                   |       |
| 98  | inductype_del__98                                                   | Other                                                       |                                                                                                                                                                                                                                                                                                                                                                                                                                                                           |   |                  |                          |    |                  |                             |   |                  |                |   |                  |                |   |                  |          |    |                   |       |
| 110 | [pph_del]                                                           | Was a PPH noted?                                            | dropdown<br><table border="1"> <tr><td>1</td><td>Yes</td></tr> <tr><td>2</td><td>No</td></tr> <tr><td>99</td><td>Not sure</td></tr> </table>                                                                                                                                                                                                                                                                                                                              | 1 | Yes              | 2                        | No | 99               | Not sure                    |   |                  |                |   |                  |                |   |                  |          |    |                   |       |
| 1   | Yes                                                                 |                                                             |                                                                                                                                                                                                                                                                                                                                                                                                                                                                           |   |                  |                          |    |                  |                             |   |                  |                |   |                  |                |   |                  |          |    |                   |       |
| 2   | No                                                                  |                                                             |                                                                                                                                                                                                                                                                                                                                                                                                                                                                           |   |                  |                          |    |                  |                             |   |                  |                |   |                  |                |   |                  |          |    |                   |       |
| 99  | Not sure                                                            |                                                             |                                                                                                                                                                                                                                                                                                                                                                                                                                                                           |   |                  |                          |    |                  |                             |   |                  |                |   |                  |                |   |                  |          |    |                   |       |
| 111 | [transfx_del]                                                       | Was the woman given a blood transfusion?                    | dropdown<br><table border="1"> <tr><td>1</td><td>Yes</td></tr> <tr><td>2</td><td>No</td></tr> <tr><td>99</td><td>Not sure</td></tr> </table>                                                                                                                                                                                                                                                                                                                              | 1 | Yes              | 2                        | No | 99               | Not sure                    |   |                  |                |   |                  |                |   |                  |          |    |                   |       |
| 1   | Yes                                                                 |                                                             |                                                                                                                                                                                                                                                                                                                                                                                                                                                                           |   |                  |                          |    |                  |                             |   |                  |                |   |                  |                |   |                  |          |    |                   |       |
| 2   | No                                                                  |                                                             |                                                                                                                                                                                                                                                                                                                                                                                                                                                                           |   |                  |                          |    |                  |                             |   |                  |                |   |                  |                |   |                  |          |    |                   |       |
| 99  | Not sure                                                            |                                                             |                                                                                                                                                                                                                                                                                                                                                                                                                                                                           |   |                  |                          |    |                  |                             |   |                  |                |   |                  |                |   |                  |          |    |                   |       |
| 112 | [unittrans_del]<br>Show the field ONLY if:<br>[transfx_del] = '1'   | How many units of blood?                                    | text (integer, Min: 1, Max: 30)                                                                                                                                                                                                                                                                                                                                                                                                                                           |   |                  |                          |    |                  |                             |   |                  |                |   |                  |                |   |                  |          |    |                   |       |
| 113 | [obstruct_del]                                                      | Was obstructed labour noted?                                | dropdown<br><table border="1"> <tr><td>1</td><td>Yes</td></tr> <tr><td>2</td><td>No</td></tr> <tr><td>99</td><td>Not sure</td></tr> </table>                                                                                                                                                                                                                                                                                                                              | 1 | Yes              | 2                        | No | 99               | Not sure                    |   |                  |                |   |                  |                |   |                  |          |    |                   |       |
| 1   | Yes                                                                 |                                                             |                                                                                                                                                                                                                                                                                                                                                                                                                                                                           |   |                  |                          |    |                  |                             |   |                  |                |   |                  |                |   |                  |          |    |                   |       |
| 2   | No                                                                  |                                                             |                                                                                                                                                                                                                                                                                                                                                                                                                                                                           |   |                  |                          |    |                  |                             |   |                  |                |   |                  |                |   |                  |          |    |                   |       |
| 99  | Not sure                                                            |                                                             |                                                                                                                                                                                                                                                                                                                                                                                                                                                                           |   |                  |                          |    |                  |                             |   |                  |                |   |                  |                |   |                  |          |    |                   |       |
| 114 | [meconium_del]                                                      | Was any meconium noted in the amniotic fluid during labour? | dropdown<br><table border="1"> <tr><td>1</td><td>Yes</td></tr> <tr><td>2</td><td>No</td></tr> <tr><td>99</td><td>Not sure</td></tr> </table>                                                                                                                                                                                                                                                                                                                              | 1 | Yes              | 2                        | No | 99               | Not sure                    |   |                  |                |   |                  |                |   |                  |          |    |                   |       |
| 1   | Yes                                                                 |                                                             |                                                                                                                                                                                                                                                                                                                                                                                                                                                                           |   |                  |                          |    |                  |                             |   |                  |                |   |                  |                |   |                  |          |    |                   |       |
| 2   | No                                                                  |                                                             |                                                                                                                                                                                                                                                                                                                                                                                                                                                                           |   |                  |                          |    |                  |                             |   |                  |                |   |                  |                |   |                  |          |    |                   |       |
| 99  | Not sure                                                            |                                                             |                                                                                                                                                                                                                                                                                                                                                                                                                                                                           |   |                  |                          |    |                  |                             |   |                  |                |   |                  |                |   |                  |          |    |                   |       |

|     |                                                                                             |                                                                                            |                                                                                                                                                                                                                                                                                                                                                                                                                             |   |                                            |   |                                                                        |   |                                                            |    |                                                  |    |          |   |   |   |   |   |   |   |   |   |   |    |    |
|-----|---------------------------------------------------------------------------------------------|--------------------------------------------------------------------------------------------|-----------------------------------------------------------------------------------------------------------------------------------------------------------------------------------------------------------------------------------------------------------------------------------------------------------------------------------------------------------------------------------------------------------------------------|---|--------------------------------------------|---|------------------------------------------------------------------------|---|------------------------------------------------------------|----|--------------------------------------------------|----|----------|---|---|---|---|---|---|---|---|---|---|----|----|
| 115 | [vagexam_del]                                                                               | Number of vaginal exams (self reported best estimate)                                      | dropdown<br><table border="1"> <tr><td>0</td><td>0</td></tr> <tr><td>1</td><td>1</td></tr> <tr><td>2</td><td>2</td></tr> <tr><td>3</td><td>3</td></tr> <tr><td>4</td><td>4</td></tr> <tr><td>5</td><td>5</td></tr> <tr><td>6</td><td>6</td></tr> <tr><td>7</td><td>7</td></tr> <tr><td>8</td><td>8</td></tr> <tr><td>9</td><td>9</td></tr> <tr><td>10</td><td>&gt;9</td></tr> </table>                                      | 0 | 0                                          | 1 | 1                                                                      | 2 | 2                                                          | 3  | 3                                                | 4  | 4        | 5 | 5 | 6 | 6 | 7 | 7 | 8 | 8 | 9 | 9 | 10 | >9 |
| 0   | 0                                                                                           |                                                                                            |                                                                                                                                                                                                                                                                                                                                                                                                                             |   |                                            |   |                                                                        |   |                                                            |    |                                                  |    |          |   |   |   |   |   |   |   |   |   |   |    |    |
| 1   | 1                                                                                           |                                                                                            |                                                                                                                                                                                                                                                                                                                                                                                                                             |   |                                            |   |                                                                        |   |                                                            |    |                                                  |    |          |   |   |   |   |   |   |   |   |   |   |    |    |
| 2   | 2                                                                                           |                                                                                            |                                                                                                                                                                                                                                                                                                                                                                                                                             |   |                                            |   |                                                                        |   |                                                            |    |                                                  |    |          |   |   |   |   |   |   |   |   |   |   |    |    |
| 3   | 3                                                                                           |                                                                                            |                                                                                                                                                                                                                                                                                                                                                                                                                             |   |                                            |   |                                                                        |   |                                                            |    |                                                  |    |          |   |   |   |   |   |   |   |   |   |   |    |    |
| 4   | 4                                                                                           |                                                                                            |                                                                                                                                                                                                                                                                                                                                                                                                                             |   |                                            |   |                                                                        |   |                                                            |    |                                                  |    |          |   |   |   |   |   |   |   |   |   |   |    |    |
| 5   | 5                                                                                           |                                                                                            |                                                                                                                                                                                                                                                                                                                                                                                                                             |   |                                            |   |                                                                        |   |                                                            |    |                                                  |    |          |   |   |   |   |   |   |   |   |   |   |    |    |
| 6   | 6                                                                                           |                                                                                            |                                                                                                                                                                                                                                                                                                                                                                                                                             |   |                                            |   |                                                                        |   |                                                            |    |                                                  |    |          |   |   |   |   |   |   |   |   |   |   |    |    |
| 7   | 7                                                                                           |                                                                                            |                                                                                                                                                                                                                                                                                                                                                                                                                             |   |                                            |   |                                                                        |   |                                                            |    |                                                  |    |          |   |   |   |   |   |   |   |   |   |   |    |    |
| 8   | 8                                                                                           |                                                                                            |                                                                                                                                                                                                                                                                                                                                                                                                                             |   |                                            |   |                                                                        |   |                                                            |    |                                                  |    |          |   |   |   |   |   |   |   |   |   |   |    |    |
| 9   | 9                                                                                           |                                                                                            |                                                                                                                                                                                                                                                                                                                                                                                                                             |   |                                            |   |                                                                        |   |                                                            |    |                                                  |    |          |   |   |   |   |   |   |   |   |   |   |    |    |
| 10  | >9                                                                                          |                                                                                            |                                                                                                                                                                                                                                                                                                                                                                                                                             |   |                                            |   |                                                                        |   |                                                            |    |                                                  |    |          |   |   |   |   |   |   |   |   |   |   |    |    |
| 116 | [placenta_del]                                                                              | Placental complications noted?                                                             | dropdown<br><table border="1"> <tr><td>1</td><td>Placenta previa</td></tr> <tr><td>2</td><td>Placenta Abruption</td></tr> <tr><td>3</td><td>Placenta accreta</td></tr> <tr><td>4</td><td>Retained placenta</td></tr> <tr><td>99</td><td>None</td></tr> </table>                                                                                                                                                             | 1 | Placenta previa                            | 2 | Placenta Abruption                                                     | 3 | Placenta accreta                                           | 4  | Retained placenta                                | 99 | None     |   |   |   |   |   |   |   |   |   |   |    |    |
| 1   | Placenta previa                                                                             |                                                                                            |                                                                                                                                                                                                                                                                                                                                                                                                                             |   |                                            |   |                                                                        |   |                                                            |    |                                                  |    |          |   |   |   |   |   |   |   |   |   |   |    |    |
| 2   | Placenta Abruption                                                                          |                                                                                            |                                                                                                                                                                                                                                                                                                                                                                                                                             |   |                                            |   |                                                                        |   |                                                            |    |                                                  |    |          |   |   |   |   |   |   |   |   |   |   |    |    |
| 3   | Placenta accreta                                                                            |                                                                                            |                                                                                                                                                                                                                                                                                                                                                                                                                             |   |                                            |   |                                                                        |   |                                                            |    |                                                  |    |          |   |   |   |   |   |   |   |   |   |   |    |    |
| 4   | Retained placenta                                                                           |                                                                                            |                                                                                                                                                                                                                                                                                                                                                                                                                             |   |                                            |   |                                                                        |   |                                                            |    |                                                  |    |          |   |   |   |   |   |   |   |   |   |   |    |    |
| 99  | None                                                                                        |                                                                                            |                                                                                                                                                                                                                                                                                                                                                                                                                             |   |                                            |   |                                                                        |   |                                                            |    |                                                  |    |          |   |   |   |   |   |   |   |   |   |   |    |    |
| 117 | [man_placenta_del]                                                                          | Manual removal of placenta                                                                 | yesno<br><table border="1"> <tr><td>1</td><td>Yes</td></tr> <tr><td>0</td><td>No</td></tr> </table>                                                                                                                                                                                                                                                                                                                         | 1 | Yes                                        | 0 | No                                                                     |   |                                                            |    |                                                  |    |          |   |   |   |   |   |   |   |   |   |   |    |    |
| 1   | Yes                                                                                         |                                                                                            |                                                                                                                                                                                                                                                                                                                                                                                                                             |   |                                            |   |                                                                        |   |                                                            |    |                                                  |    |          |   |   |   |   |   |   |   |   |   |   |    |    |
| 0   | No                                                                                          |                                                                                            |                                                                                                                                                                                                                                                                                                                                                                                                                             |   |                                            |   |                                                                        |   |                                                            |    |                                                  |    |          |   |   |   |   |   |   |   |   |   |   |    |    |
| 118 | [other_del]                                                                                 | Other major event or conditions during delivery?                                           | notes                                                                                                                                                                                                                                                                                                                                                                                                                       |   |                                            |   |                                                                        |   |                                                            |    |                                                  |    |          |   |   |   |   |   |   |   |   |   |   |    |    |
| 119 | [csecturgency_del]<br>Show the field ONLY if:<br>[delmode_del] = '3' or [delmode_del] = '4' | Section Header: <i>Caesarian Section Variables</i><br>Surgical urgency (per clinical team) | dropdown<br><table border="1"> <tr><td>1</td><td>Immediate threat to life of woman or fetus</td></tr> <tr><td>2</td><td>Maternal or fetal compromise which is not immediately life-threatening</td></tr> <tr><td>3</td><td>Needing early delivery but no maternal or fetal compromise</td></tr> <tr><td>4</td><td>At a time to suit the patient and maternity team</td></tr> <tr><td>99</td><td>Not sure</td></tr> </table> | 1 | Immediate threat to life of woman or fetus | 2 | Maternal or fetal compromise which is not immediately life-threatening | 3 | Needing early delivery but no maternal or fetal compromise | 4  | At a time to suit the patient and maternity team | 99 | Not sure |   |   |   |   |   |   |   |   |   |   |    |    |
| 1   | Immediate threat to life of woman or fetus                                                  |                                                                                            |                                                                                                                                                                                                                                                                                                                                                                                                                             |   |                                            |   |                                                                        |   |                                                            |    |                                                  |    |          |   |   |   |   |   |   |   |   |   |   |    |    |
| 2   | Maternal or fetal compromise which is not immediately life-threatening                      |                                                                                            |                                                                                                                                                                                                                                                                                                                                                                                                                             |   |                                            |   |                                                                        |   |                                                            |    |                                                  |    |          |   |   |   |   |   |   |   |   |   |   |    |    |
| 3   | Needing early delivery but no maternal or fetal compromise                                  |                                                                                            |                                                                                                                                                                                                                                                                                                                                                                                                                             |   |                                            |   |                                                                        |   |                                                            |    |                                                  |    |          |   |   |   |   |   |   |   |   |   |   |    |    |
| 4   | At a time to suit the patient and maternity team                                            |                                                                                            |                                                                                                                                                                                                                                                                                                                                                                                                                             |   |                                            |   |                                                                        |   |                                                            |    |                                                  |    |          |   |   |   |   |   |   |   |   |   |   |    |    |
| 99  | Not sure                                                                                    |                                                                                            |                                                                                                                                                                                                                                                                                                                                                                                                                             |   |                                            |   |                                                                        |   |                                                            |    |                                                  |    |          |   |   |   |   |   |   |   |   |   |   |    |    |
| 120 | [csect_delay_del]<br>Show the field ONLY if:<br>[delmode_del] = '3' or [delmode_del] = '4'  | Estimated decision to delivery time                                                        | dropdown<br><table border="1"> <tr><td>1</td><td>No delay</td></tr> <tr><td>2</td><td>30-60m</td></tr> <tr><td>3</td><td>61m - 120m</td></tr> <tr><td>4</td><td>&gt;120m</td></tr> <tr><td>5</td><td>Not sure</td></tr> </table>                                                                                                                                                                                            | 1 | No delay                                   | 2 | 30-60m                                                                 | 3 | 61m - 120m                                                 | 4  | >120m                                            | 5  | Not sure |   |   |   |   |   |   |   |   |   |   |    |    |
| 1   | No delay                                                                                    |                                                                                            |                                                                                                                                                                                                                                                                                                                                                                                                                             |   |                                            |   |                                                                        |   |                                                            |    |                                                  |    |          |   |   |   |   |   |   |   |   |   |   |    |    |
| 2   | 30-60m                                                                                      |                                                                                            |                                                                                                                                                                                                                                                                                                                                                                                                                             |   |                                            |   |                                                                        |   |                                                            |    |                                                  |    |          |   |   |   |   |   |   |   |   |   |   |    |    |
| 3   | 61m - 120m                                                                                  |                                                                                            |                                                                                                                                                                                                                                                                                                                                                                                                                             |   |                                            |   |                                                                        |   |                                                            |    |                                                  |    |          |   |   |   |   |   |   |   |   |   |   |    |    |
| 4   | >120m                                                                                       |                                                                                            |                                                                                                                                                                                                                                                                                                                                                                                                                             |   |                                            |   |                                                                        |   |                                                            |    |                                                  |    |          |   |   |   |   |   |   |   |   |   |   |    |    |
| 5   | Not sure                                                                                    |                                                                                            |                                                                                                                                                                                                                                                                                                                                                                                                                             |   |                                            |   |                                                                        |   |                                                            |    |                                                  |    |          |   |   |   |   |   |   |   |   |   |   |    |    |
| 121 | [heme_del]<br>Show the field ONLY if:<br>[delmode_del] = '3' or [delmode_del] = '4'         | Pre-surgery hemoglobin level                                                               | text                                                                                                                                                                                                                                                                                                                                                                                                                        |   |                                            |   |                                                                        |   |                                                            |    |                                                  |    |          |   |   |   |   |   |   |   |   |   |   |    |    |
| 122 | [abx_del]<br>Show the field ONLY if:<br>[delmode_del] = '3' or [delmode_del] = '4'          | Were prophylactic antibiotics administered?                                                | dropdown<br><table border="1"> <tr><td>1</td><td>Yes - within 1 hour of incision</td></tr> <tr><td>2</td><td>Yes - but after incision</td></tr> <tr><td>3</td><td>No</td></tr> <tr><td>99</td><td>Not sure</td></tr> </table>                                                                                                                                                                                               | 1 | Yes - within 1 hour of incision            | 2 | Yes - but after incision                                               | 3 | No                                                         | 99 | Not sure                                         |    |          |   |   |   |   |   |   |   |   |   |   |    |    |
| 1   | Yes - within 1 hour of incision                                                             |                                                                                            |                                                                                                                                                                                                                                                                                                                                                                                                                             |   |                                            |   |                                                                        |   |                                                            |    |                                                  |    |          |   |   |   |   |   |   |   |   |   |   |    |    |
| 2   | Yes - but after incision                                                                    |                                                                                            |                                                                                                                                                                                                                                                                                                                                                                                                                             |   |                                            |   |                                                                        |   |                                                            |    |                                                  |    |          |   |   |   |   |   |   |   |   |   |   |    |    |
| 3   | No                                                                                          |                                                                                            |                                                                                                                                                                                                                                                                                                                                                                                                                             |   |                                            |   |                                                                        |   |                                                            |    |                                                  |    |          |   |   |   |   |   |   |   |   |   |   |    |    |
| 99  | Not sure                                                                                    |                                                                                            |                                                                                                                                                                                                                                                                                                                                                                                                                             |   |                                            |   |                                                                        |   |                                                            |    |                                                  |    |          |   |   |   |   |   |   |   |   |   |   |    |    |

|                                                             |                                                                                         |                                                                        |                                                                                                                                                                                                                                                                                                                                                                                                                                                                                                                                                  |   |              |   |                              |    |                |   |               |   |                |   |               |   |               |   |                        |   |                      |    |                 |    |      |
|-------------------------------------------------------------|-----------------------------------------------------------------------------------------|------------------------------------------------------------------------|--------------------------------------------------------------------------------------------------------------------------------------------------------------------------------------------------------------------------------------------------------------------------------------------------------------------------------------------------------------------------------------------------------------------------------------------------------------------------------------------------------------------------------------------------|---|--------------|---|------------------------------|----|----------------|---|---------------|---|----------------|---|---------------|---|---------------|---|------------------------|---|----------------------|----|-----------------|----|------|
| 123                                                         | [csect_abx_del]<br>Show the field ONLY if:<br>[abx_del] = '2' or [abx_del] = '1'        | List all antibiotics used for prophylaxis                              | dropdown<br><table border="1"> <tr><td>1</td><td>IV Cefazolin</td></tr> <tr><td>2</td><td>IV Ampicillin or Amoxicillin</td></tr> <tr><td>3</td><td>IV cloxacillin</td></tr> <tr><td>4</td><td>IV penicillin</td></tr> <tr><td>5</td><td>IV ceftriaxone</td></tr> <tr><td>6</td><td>IV gentamicin</td></tr> <tr><td>7</td><td>IV vancomycin</td></tr> <tr><td>8</td><td>IV or PO metronidazole</td></tr> <tr><td>9</td><td>IV or PO Clindamycin</td></tr> <tr><td>98</td><td>Other (specify)</td></tr> <tr><td>99</td><td>None</td></tr> </table> | 1 | IV Cefazolin | 2 | IV Ampicillin or Amoxicillin | 3  | IV cloxacillin | 4 | IV penicillin | 5 | IV ceftriaxone | 6 | IV gentamicin | 7 | IV vancomycin | 8 | IV or PO metronidazole | 9 | IV or PO Clindamycin | 98 | Other (specify) | 99 | None |
| 1                                                           | IV Cefazolin                                                                            |                                                                        |                                                                                                                                                                                                                                                                                                                                                                                                                                                                                                                                                  |   |              |   |                              |    |                |   |               |   |                |   |               |   |               |   |                        |   |                      |    |                 |    |      |
| 2                                                           | IV Ampicillin or Amoxicillin                                                            |                                                                        |                                                                                                                                                                                                                                                                                                                                                                                                                                                                                                                                                  |   |              |   |                              |    |                |   |               |   |                |   |               |   |               |   |                        |   |                      |    |                 |    |      |
| 3                                                           | IV cloxacillin                                                                          |                                                                        |                                                                                                                                                                                                                                                                                                                                                                                                                                                                                                                                                  |   |              |   |                              |    |                |   |               |   |                |   |               |   |               |   |                        |   |                      |    |                 |    |      |
| 4                                                           | IV penicillin                                                                           |                                                                        |                                                                                                                                                                                                                                                                                                                                                                                                                                                                                                                                                  |   |              |   |                              |    |                |   |               |   |                |   |               |   |               |   |                        |   |                      |    |                 |    |      |
| 5                                                           | IV ceftriaxone                                                                          |                                                                        |                                                                                                                                                                                                                                                                                                                                                                                                                                                                                                                                                  |   |              |   |                              |    |                |   |               |   |                |   |               |   |               |   |                        |   |                      |    |                 |    |      |
| 6                                                           | IV gentamicin                                                                           |                                                                        |                                                                                                                                                                                                                                                                                                                                                                                                                                                                                                                                                  |   |              |   |                              |    |                |   |               |   |                |   |               |   |               |   |                        |   |                      |    |                 |    |      |
| 7                                                           | IV vancomycin                                                                           |                                                                        |                                                                                                                                                                                                                                                                                                                                                                                                                                                                                                                                                  |   |              |   |                              |    |                |   |               |   |                |   |               |   |               |   |                        |   |                      |    |                 |    |      |
| 8                                                           | IV or PO metronidazole                                                                  |                                                                        |                                                                                                                                                                                                                                                                                                                                                                                                                                                                                                                                                  |   |              |   |                              |    |                |   |               |   |                |   |               |   |               |   |                        |   |                      |    |                 |    |      |
| 9                                                           | IV or PO Clindamycin                                                                    |                                                                        |                                                                                                                                                                                                                                                                                                                                                                                                                                                                                                                                                  |   |              |   |                              |    |                |   |               |   |                |   |               |   |               |   |                        |   |                      |    |                 |    |      |
| 98                                                          | Other (specify)                                                                         |                                                                        |                                                                                                                                                                                                                                                                                                                                                                                                                                                                                                                                                  |   |              |   |                              |    |                |   |               |   |                |   |               |   |               |   |                        |   |                      |    |                 |    |      |
| 99                                                          | None                                                                                    |                                                                        |                                                                                                                                                                                                                                                                                                                                                                                                                                                                                                                                                  |   |              |   |                              |    |                |   |               |   |                |   |               |   |               |   |                        |   |                      |    |                 |    |      |
| 124                                                         | [otherabx_del]<br>Show the field ONLY if:<br>[csect_abx_del] = '98'                     | Specify other antibiotic                                               | text                                                                                                                                                                                                                                                                                                                                                                                                                                                                                                                                             |   |              |   |                              |    |                |   |               |   |                |   |               |   |               |   |                        |   |                      |    |                 |    |      |
| 125                                                         | [anticoag_del]<br>Show the field ONLY if:<br>[delmode_del] = '3' or [delmode_del] = '4' | Were anticoagulants administered?                                      | yesno<br><table border="1"> <tr><td>1</td><td>Yes</td></tr> <tr><td>0</td><td>No</td></tr> </table>                                                                                                                                                                                                                                                                                                                                                                                                                                              | 1 | Yes          | 0 | No                           |    |                |   |               |   |                |   |               |   |               |   |                        |   |                      |    |                 |    |      |
| 1                                                           | Yes                                                                                     |                                                                        |                                                                                                                                                                                                                                                                                                                                                                                                                                                                                                                                                  |   |              |   |                              |    |                |   |               |   |                |   |               |   |               |   |                        |   |                      |    |                 |    |      |
| 0                                                           | No                                                                                      |                                                                        |                                                                                                                                                                                                                                                                                                                                                                                                                                                                                                                                                  |   |              |   |                              |    |                |   |               |   |                |   |               |   |               |   |                        |   |                      |    |                 |    |      |
| 126                                                         | [delivery_maternal_complete]                                                            | Section Header: <i>Form Status</i><br>Complete?                        | dropdown<br><table border="1"> <tr><td>0</td><td>Incomplete</td></tr> <tr><td>1</td><td>Unverified</td></tr> <tr><td>2</td><td>Complete</td></tr> </table>                                                                                                                                                                                                                                                                                                                                                                                       | 0 | Incomplete   | 1 | Unverified                   | 2  | Complete       |   |               |   |                |   |               |   |               |   |                        |   |                      |    |                 |    |      |
| 0                                                           | Incomplete                                                                              |                                                                        |                                                                                                                                                                                                                                                                                                                                                                                                                                                                                                                                                  |   |              |   |                              |    |                |   |               |   |                |   |               |   |               |   |                        |   |                      |    |                 |    |      |
| 1                                                           | Unverified                                                                              |                                                                        |                                                                                                                                                                                                                                                                                                                                                                                                                                                                                                                                                  |   |              |   |                              |    |                |   |               |   |                |   |               |   |               |   |                        |   |                      |    |                 |    |      |
| 2                                                           | Complete                                                                                |                                                                        |                                                                                                                                                                                                                                                                                                                                                                                                                                                                                                                                                  |   |              |   |                              |    |                |   |               |   |                |   |               |   |               |   |                        |   |                      |    |                 |    |      |
| Instrument: <b>6. Delivery Neonatal</b> (delivery_neonatal) |                                                                                         |                                                                        |                                                                                                                                                                                                                                                                                                                                                                                                                                                                                                                                                  |   |              |   |                              |    |                |   |               |   |                |   |               |   |               |   |                        |   |                      |    |                 |    |      |
| 127                                                         | [infantstatus_del]                                                                      | Section Header: <i>Details of Delivery</i><br>Was the baby born alive? | yesno<br><table border="1"> <tr><td>1</td><td>Yes</td></tr> <tr><td>0</td><td>No</td></tr> </table>                                                                                                                                                                                                                                                                                                                                                                                                                                              | 1 | Yes          | 0 | No                           |    |                |   |               |   |                |   |               |   |               |   |                        |   |                      |    |                 |    |      |
| 1                                                           | Yes                                                                                     |                                                                        |                                                                                                                                                                                                                                                                                                                                                                                                                                                                                                                                                  |   |              |   |                              |    |                |   |               |   |                |   |               |   |               |   |                        |   |                      |    |                 |    |      |
| 0                                                           | No                                                                                      |                                                                        |                                                                                                                                                                                                                                                                                                                                                                                                                                                                                                                                                  |   |              |   |                              |    |                |   |               |   |                |   |               |   |               |   |                        |   |                      |    |                 |    |      |
| 128                                                         | [sb20wk_del]<br>Show the field ONLY if:<br>[infantstatus_del] = '0'                     | Is stillbirth assumed to be >20 weeks gestation?                       | yesno<br><table border="1"> <tr><td>1</td><td>Yes</td></tr> <tr><td>0</td><td>No</td></tr> </table>                                                                                                                                                                                                                                                                                                                                                                                                                                              | 1 | Yes          | 0 | No                           |    |                |   |               |   |                |   |               |   |               |   |                        |   |                      |    |                 |    |      |
| 1                                                           | Yes                                                                                     |                                                                        |                                                                                                                                                                                                                                                                                                                                                                                                                                                                                                                                                  |   |              |   |                              |    |                |   |               |   |                |   |               |   |               |   |                        |   |                      |    |                 |    |      |
| 0                                                           | No                                                                                      |                                                                        |                                                                                                                                                                                                                                                                                                                                                                                                                                                                                                                                                  |   |              |   |                              |    |                |   |               |   |                |   |               |   |               |   |                        |   |                      |    |                 |    |      |
| 129                                                         | [sb_del]<br>Show the field ONLY if:<br>[infantstatus_del] = '0'                         | Type of stillbirth                                                     | dropdown<br><table border="1"> <tr><td>1</td><td>Fresh</td></tr> <tr><td>2</td><td>Macerated</td></tr> <tr><td>99</td><td>Not sure</td></tr> </table>                                                                                                                                                                                                                                                                                                                                                                                            | 1 | Fresh        | 2 | Macerated                    | 99 | Not sure       |   |               |   |                |   |               |   |               |   |                        |   |                      |    |                 |    |      |
| 1                                                           | Fresh                                                                                   |                                                                        |                                                                                                                                                                                                                                                                                                                                                                                                                                                                                                                                                  |   |              |   |                              |    |                |   |               |   |                |   |               |   |               |   |                        |   |                      |    |                 |    |      |
| 2                                                           | Macerated                                                                               |                                                                        |                                                                                                                                                                                                                                                                                                                                                                                                                                                                                                                                                  |   |              |   |                              |    |                |   |               |   |                |   |               |   |               |   |                        |   |                      |    |                 |    |      |
| 99                                                          | Not sure                                                                                |                                                                        |                                                                                                                                                                                                                                                                                                                                                                                                                                                                                                                                                  |   |              |   |                              |    |                |   |               |   |                |   |               |   |               |   |                        |   |                      |    |                 |    |      |
| 130                                                         | [sbcongenital_del]<br>Show the field ONLY if:<br>[infantstatus_del] = '0'               | Presence of visible congenital malformation                            | dropdown<br><table border="1"> <tr><td>1</td><td>Yes</td></tr> <tr><td>2</td><td>No</td></tr> <tr><td>3</td><td>Not sure</td></tr> </table>                                                                                                                                                                                                                                                                                                                                                                                                      | 1 | Yes          | 2 | No                           | 3  | Not sure       |   |               |   |                |   |               |   |               |   |                        |   |                      |    |                 |    |      |
| 1                                                           | Yes                                                                                     |                                                                        |                                                                                                                                                                                                                                                                                                                                                                                                                                                                                                                                                  |   |              |   |                              |    |                |   |               |   |                |   |               |   |               |   |                        |   |                      |    |                 |    |      |
| 2                                                           | No                                                                                      |                                                                        |                                                                                                                                                                                                                                                                                                                                                                                                                                                                                                                                                  |   |              |   |                              |    |                |   |               |   |                |   |               |   |               |   |                        |   |                      |    |                 |    |      |
| 3                                                           | Not sure                                                                                |                                                                        |                                                                                                                                                                                                                                                                                                                                                                                                                                                                                                                                                  |   |              |   |                              |    |                |   |               |   |                |   |               |   |               |   |                        |   |                      |    |                 |    |      |
| 131                                                         | [sbsex_del]<br>Show the field ONLY if:<br>[infantstatus_del] = '0'                      | Sex of the stillborn baby                                              | dropdown<br><table border="1"> <tr><td>1</td><td>Male</td></tr> <tr><td>2</td><td>Female</td></tr> <tr><td>99</td><td>Not sure</td></tr> </table>                                                                                                                                                                                                                                                                                                                                                                                                | 1 | Male         | 2 | Female                       | 99 | Not sure       |   |               |   |                |   |               |   |               |   |                        |   |                      |    |                 |    |      |
| 1                                                           | Male                                                                                    |                                                                        |                                                                                                                                                                                                                                                                                                                                                                                                                                                                                                                                                  |   |              |   |                              |    |                |   |               |   |                |   |               |   |               |   |                        |   |                      |    |                 |    |      |
| 2                                                           | Female                                                                                  |                                                                        |                                                                                                                                                                                                                                                                                                                                                                                                                                                                                                                                                  |   |              |   |                              |    |                |   |               |   |                |   |               |   |               |   |                        |   |                      |    |                 |    |      |
| 99                                                          | Not sure                                                                                |                                                                        |                                                                                                                                                                                                                                                                                                                                                                                                                                                                                                                                                  |   |              |   |                              |    |                |   |               |   |                |   |               |   |               |   |                        |   |                      |    |                 |    |      |
| 132                                                         | [sexbb_del]<br>Show the field ONLY if:<br>[infantstatus_del] = '1'                      | Sex of the baby                                                        | dropdown<br><table border="1"> <tr><td>1</td><td>Male</td></tr> <tr><td>2</td><td>Female</td></tr> <tr><td>98</td><td>Other</td></tr> </table>                                                                                                                                                                                                                                                                                                                                                                                                   | 1 | Male         | 2 | Female                       | 98 | Other          |   |               |   |                |   |               |   |               |   |                        |   |                      |    |                 |    |      |
| 1                                                           | Male                                                                                    |                                                                        |                                                                                                                                                                                                                                                                                                                                                                                                                                                                                                                                                  |   |              |   |                              |    |                |   |               |   |                |   |               |   |               |   |                        |   |                      |    |                 |    |      |
| 2                                                           | Female                                                                                  |                                                                        |                                                                                                                                                                                                                                                                                                                                                                                                                                                                                                                                                  |   |              |   |                              |    |                |   |               |   |                |   |               |   |               |   |                        |   |                      |    |                 |    |      |
| 98                                                          | Other                                                                                   |                                                                        |                                                                                                                                                                                                                                                                                                                                                                                                                                                                                                                                                  |   |              |   |                              |    |                |   |               |   |                |   |               |   |               |   |                        |   |                      |    |                 |    |      |
| 133                                                         | [apgar1_del]<br>Show the field ONLY if:<br>[infantstatus_del] = '1'                     | Apgar score after 1 minute                                             | text (integer, Min: 1, Max: 10)                                                                                                                                                                                                                                                                                                                                                                                                                                                                                                                  |   |              |   |                              |    |                |   |               |   |                |   |               |   |               |   |                        |   |                      |    |                 |    |      |

|                                                                                   |                                                                         |                                                                                     |                                                                                                                                                                                                                                                                                                                                                                                                                                                                                                                                                                                                                                                                                              |   |                  |                  |            |                  |          |   |                  |          |            |                  |         |   |                  |       |       |                  |            |    |                  |                   |       |                  |             |    |                   |       |    |                   |      |
|-----------------------------------------------------------------------------------|-------------------------------------------------------------------------|-------------------------------------------------------------------------------------|----------------------------------------------------------------------------------------------------------------------------------------------------------------------------------------------------------------------------------------------------------------------------------------------------------------------------------------------------------------------------------------------------------------------------------------------------------------------------------------------------------------------------------------------------------------------------------------------------------------------------------------------------------------------------------------------|---|------------------|------------------|------------|------------------|----------|---|------------------|----------|------------|------------------|---------|---|------------------|-------|-------|------------------|------------|----|------------------|-------------------|-------|------------------|-------------|----|-------------------|-------|----|-------------------|------|
| 134                                                                               | [apgar5_del]<br>Show the field ONLY if:<br>[infantstatus_del] = '1'     | Apgar score after 5 minutes                                                         | text (integer, Min: 1, Max: 10)                                                                                                                                                                                                                                                                                                                                                                                                                                                                                                                                                                                                                                                              |   |                  |                  |            |                  |          |   |                  |          |            |                  |         |   |                  |       |       |                  |            |    |                  |                   |       |                  |             |    |                   |       |    |                   |      |
| 135                                                                               | [cord_delay_del]                                                        | Did the patient experience delayed cord clamping (> 1 minute)?                      | dropdown<br><table border="1"> <tr><td>1</td><td>Yes</td></tr> <tr><td>2</td><td>No</td></tr> <tr><td>3</td><td>Not sure</td></tr> </table>                                                                                                                                                                                                                                                                                                                                                                                                                                                                                                                                                  | 1 | Yes              | 2                | No         | 3                | Not sure |   |                  |          |            |                  |         |   |                  |       |       |                  |            |    |                  |                   |       |                  |             |    |                   |       |    |                   |      |
| 1                                                                                 | Yes                                                                     |                                                                                     |                                                                                                                                                                                                                                                                                                                                                                                                                                                                                                                                                                                                                                                                                              |   |                  |                  |            |                  |          |   |                  |          |            |                  |         |   |                  |       |       |                  |            |    |                  |                   |       |                  |             |    |                   |       |    |                   |      |
| 2                                                                                 | No                                                                      |                                                                                     |                                                                                                                                                                                                                                                                                                                                                                                                                                                                                                                                                                                                                                                                                              |   |                  |                  |            |                  |          |   |                  |          |            |                  |         |   |                  |       |       |                  |            |    |                  |                   |       |                  |             |    |                   |       |    |                   |      |
| 3                                                                                 | Not sure                                                                |                                                                                     |                                                                                                                                                                                                                                                                                                                                                                                                                                                                                                                                                                                                                                                                                              |   |                  |                  |            |                  |          |   |                  |          |            |                  |         |   |                  |       |       |                  |            |    |                  |                   |       |                  |             |    |                   |       |    |                   |      |
| 136                                                                               | [weightbb_del]<br>Show the field ONLY if:<br>[infantstatus_del] = '1'   | Weight of the baby (kg)                                                             | text (number)                                                                                                                                                                                                                                                                                                                                                                                                                                                                                                                                                                                                                                                                                |   |                  |                  |            |                  |          |   |                  |          |            |                  |         |   |                  |       |       |                  |            |    |                  |                   |       |                  |             |    |                   |       |    |                   |      |
| 137                                                                               | [height_neo]<br>Show the field ONLY if:<br>[infantstatus_del] = '1'     | Length (cm)                                                                         | text (number)                                                                                                                                                                                                                                                                                                                                                                                                                                                                                                                                                                                                                                                                                |   |                  |                  |            |                  |          |   |                  |          |            |                  |         |   |                  |       |       |                  |            |    |                  |                   |       |                  |             |    |                   |       |    |                   |      |
| 138                                                                               | [rescus_del]<br>Show the field ONLY if:<br>[infantstatus_del] = '1'     | Any resuscitation at birth?                                                         | dropdown<br><table border="1"> <tr><td>1</td><td>Yes</td></tr> <tr><td>2</td><td>No</td></tr> <tr><td>99</td><td>Not sure</td></tr> </table>                                                                                                                                                                                                                                                                                                                                                                                                                                                                                                                                                 | 1 | Yes              | 2                | No         | 99               | Not sure |   |                  |          |            |                  |         |   |                  |       |       |                  |            |    |                  |                   |       |                  |             |    |                   |       |    |                   |      |
| 1                                                                                 | Yes                                                                     |                                                                                     |                                                                                                                                                                                                                                                                                                                                                                                                                                                                                                                                                                                                                                                                                              |   |                  |                  |            |                  |          |   |                  |          |            |                  |         |   |                  |       |       |                  |            |    |                  |                   |       |                  |             |    |                   |       |    |                   |      |
| 2                                                                                 | No                                                                      |                                                                                     |                                                                                                                                                                                                                                                                                                                                                                                                                                                                                                                                                                                                                                                                                              |   |                  |                  |            |                  |          |   |                  |          |            |                  |         |   |                  |       |       |                  |            |    |                  |                   |       |                  |             |    |                   |       |    |                   |      |
| 99                                                                                | Not sure                                                                |                                                                                     |                                                                                                                                                                                                                                                                                                                                                                                                                                                                                                                                                                                                                                                                                              |   |                  |                  |            |                  |          |   |                  |          |            |                  |         |   |                  |       |       |                  |            |    |                  |                   |       |                  |             |    |                   |       |    |                   |      |
| 139                                                                               | [resustype_del]<br>Show the field ONLY if:<br>[rescus_del] = '1'        | What type of resuscitation did the baby receive after birth? (check all that apply) | checkbox<br><table border="1"> <tr><td>1</td><td>resustype_del__1</td><td>Stimulation only</td></tr> <tr><td>2</td><td>resustype_del__2</td><td>Oxygen</td></tr> <tr><td>3</td><td>resustype_del__3</td><td>Bag mask</td></tr> <tr><td>4</td><td>resustype_del__4</td><td>Suction</td></tr> <tr><td>5</td><td>resustype_del__5</td><td>Drugs</td></tr> <tr><td>6</td><td>resustype_del__6</td><td>Warming</td></tr> <tr><td>7</td><td>resustype_del__7</td><td>Chest compression</td></tr> <tr><td>8</td><td>resustype_del__8</td><td>Don't know</td></tr> <tr><td>98</td><td>resustype_del__98</td><td>Other</td></tr> <tr><td>99</td><td>resustype_del__99</td><td>None</td></tr> </table> | 1 | resustype_del__1 | Stimulation only | 2          | resustype_del__2 | Oxygen   | 3 | resustype_del__3 | Bag mask | 4          | resustype_del__4 | Suction | 5 | resustype_del__5 | Drugs | 6     | resustype_del__6 | Warming    | 7  | resustype_del__7 | Chest compression | 8     | resustype_del__8 | Don't know  | 98 | resustype_del__98 | Other | 99 | resustype_del__99 | None |
| 1                                                                                 | resustype_del__1                                                        | Stimulation only                                                                    |                                                                                                                                                                                                                                                                                                                                                                                                                                                                                                                                                                                                                                                                                              |   |                  |                  |            |                  |          |   |                  |          |            |                  |         |   |                  |       |       |                  |            |    |                  |                   |       |                  |             |    |                   |       |    |                   |      |
| 2                                                                                 | resustype_del__2                                                        | Oxygen                                                                              |                                                                                                                                                                                                                                                                                                                                                                                                                                                                                                                                                                                                                                                                                              |   |                  |                  |            |                  |          |   |                  |          |            |                  |         |   |                  |       |       |                  |            |    |                  |                   |       |                  |             |    |                   |       |    |                   |      |
| 3                                                                                 | resustype_del__3                                                        | Bag mask                                                                            |                                                                                                                                                                                                                                                                                                                                                                                                                                                                                                                                                                                                                                                                                              |   |                  |                  |            |                  |          |   |                  |          |            |                  |         |   |                  |       |       |                  |            |    |                  |                   |       |                  |             |    |                   |       |    |                   |      |
| 4                                                                                 | resustype_del__4                                                        | Suction                                                                             |                                                                                                                                                                                                                                                                                                                                                                                                                                                                                                                                                                                                                                                                                              |   |                  |                  |            |                  |          |   |                  |          |            |                  |         |   |                  |       |       |                  |            |    |                  |                   |       |                  |             |    |                   |       |    |                   |      |
| 5                                                                                 | resustype_del__5                                                        | Drugs                                                                               |                                                                                                                                                                                                                                                                                                                                                                                                                                                                                                                                                                                                                                                                                              |   |                  |                  |            |                  |          |   |                  |          |            |                  |         |   |                  |       |       |                  |            |    |                  |                   |       |                  |             |    |                   |       |    |                   |      |
| 6                                                                                 | resustype_del__6                                                        | Warming                                                                             |                                                                                                                                                                                                                                                                                                                                                                                                                                                                                                                                                                                                                                                                                              |   |                  |                  |            |                  |          |   |                  |          |            |                  |         |   |                  |       |       |                  |            |    |                  |                   |       |                  |             |    |                   |       |    |                   |      |
| 7                                                                                 | resustype_del__7                                                        | Chest compression                                                                   |                                                                                                                                                                                                                                                                                                                                                                                                                                                                                                                                                                                                                                                                                              |   |                  |                  |            |                  |          |   |                  |          |            |                  |         |   |                  |       |       |                  |            |    |                  |                   |       |                  |             |    |                   |       |    |                   |      |
| 8                                                                                 | resustype_del__8                                                        | Don't know                                                                          |                                                                                                                                                                                                                                                                                                                                                                                                                                                                                                                                                                                                                                                                                              |   |                  |                  |            |                  |          |   |                  |          |            |                  |         |   |                  |       |       |                  |            |    |                  |                   |       |                  |             |    |                   |       |    |                   |      |
| 98                                                                                | resustype_del__98                                                       | Other                                                                               |                                                                                                                                                                                                                                                                                                                                                                                                                                                                                                                                                                                                                                                                                              |   |                  |                  |            |                  |          |   |                  |          |            |                  |         |   |                  |       |       |                  |            |    |                  |                   |       |                  |             |    |                   |       |    |                   |      |
| 99                                                                                | resustype_del__99                                                       | None                                                                                |                                                                                                                                                                                                                                                                                                                                                                                                                                                                                                                                                                                                                                                                                              |   |                  |                  |            |                  |          |   |                  |          |            |                  |         |   |                  |       |       |                  |            |    |                  |                   |       |                  |             |    |                   |       |    |                   |      |
| 140                                                                               | [delivery_neonatal_complete]                                            | Section Header: <i>Form Status</i><br>Complete?                                     | dropdown<br><table border="1"> <tr><td>0</td><td>Incomplete</td></tr> <tr><td>1</td><td>Unverified</td></tr> <tr><td>2</td><td>Complete</td></tr> </table>                                                                                                                                                                                                                                                                                                                                                                                                                                                                                                                                   | 0 | Incomplete       | 1                | Unverified | 2                | Complete |   |                  |          |            |                  |         |   |                  |       |       |                  |            |    |                  |                   |       |                  |             |    |                   |       |    |                   |      |
| 0                                                                                 | Incomplete                                                              |                                                                                     |                                                                                                                                                                                                                                                                                                                                                                                                                                                                                                                                                                                                                                                                                              |   |                  |                  |            |                  |          |   |                  |          |            |                  |         |   |                  |       |       |                  |            |    |                  |                   |       |                  |             |    |                   |       |    |                   |      |
| 1                                                                                 | Unverified                                                              |                                                                                     |                                                                                                                                                                                                                                                                                                                                                                                                                                                                                                                                                                                                                                                                                              |   |                  |                  |            |                  |          |   |                  |          |            |                  |         |   |                  |       |       |                  |            |    |                  |                   |       |                  |             |    |                   |       |    |                   |      |
| 2                                                                                 | Complete                                                                |                                                                                     |                                                                                                                                                                                                                                                                                                                                                                                                                                                                                                                                                                                                                                                                                              |   |                  |                  |            |                  |          |   |                  |          |            |                  |         |   |                  |       |       |                  |            |    |                  |                   |       |                  |             |    |                   |       |    |                   |      |
| Instrument: <b>7. Discharge Interview Maternal</b> (discharge_interview_maternal) |                                                                         |                                                                                     |                                                                                                                                                                                                                                                                                                                                                                                                                                                                                                                                                                                                                                                                                              |   |                  |                  |            |                  |          |   |                  |          |            |                  |         |   |                  |       |       |                  |            |    |                  |                   |       |                  |             |    |                   |       |    |                   |      |
| 141                                                                               | [disnurse_mat]                                                          | Nurse collecting the data                                                           | dropdown<br><table border="1"> <tr><td>1</td><td>Olivia</td></tr> <tr><td>2</td><td>Phionah</td></tr> <tr><td>3</td><td>Jonan</td></tr> <tr><td>4</td><td>Annet Happy</td></tr> <tr><td>5</td><td>Annet Mary</td></tr> <tr><td>6</td><td>Miria</td></tr> <tr><td>7</td><td>Maureen</td></tr> <tr><td>8</td><td>Clare</td></tr> <tr><td>9</td><td>Kelemensia</td></tr> <tr><td>10</td><td>Immaculate</td></tr> <tr><td>11</td><td>Bosco</td></tr> <tr><td>12</td><td>Enid Kibone</td></tr> <tr><td>98</td><td>Other</td></tr> </table>                                                                                                                                                        | 1 | Olivia           | 2                | Phionah    | 3                | Jonan    | 4 | Annet Happy      | 5        | Annet Mary | 6                | Miria   | 7 | Maureen          | 8     | Clare | 9                | Kelemensia | 10 | Immaculate       | 11                | Bosco | 12               | Enid Kibone | 98 | Other             |       |    |                   |      |
| 1                                                                                 | Olivia                                                                  |                                                                                     |                                                                                                                                                                                                                                                                                                                                                                                                                                                                                                                                                                                                                                                                                              |   |                  |                  |            |                  |          |   |                  |          |            |                  |         |   |                  |       |       |                  |            |    |                  |                   |       |                  |             |    |                   |       |    |                   |      |
| 2                                                                                 | Phionah                                                                 |                                                                                     |                                                                                                                                                                                                                                                                                                                                                                                                                                                                                                                                                                                                                                                                                              |   |                  |                  |            |                  |          |   |                  |          |            |                  |         |   |                  |       |       |                  |            |    |                  |                   |       |                  |             |    |                   |       |    |                   |      |
| 3                                                                                 | Jonan                                                                   |                                                                                     |                                                                                                                                                                                                                                                                                                                                                                                                                                                                                                                                                                                                                                                                                              |   |                  |                  |            |                  |          |   |                  |          |            |                  |         |   |                  |       |       |                  |            |    |                  |                   |       |                  |             |    |                   |       |    |                   |      |
| 4                                                                                 | Annet Happy                                                             |                                                                                     |                                                                                                                                                                                                                                                                                                                                                                                                                                                                                                                                                                                                                                                                                              |   |                  |                  |            |                  |          |   |                  |          |            |                  |         |   |                  |       |       |                  |            |    |                  |                   |       |                  |             |    |                   |       |    |                   |      |
| 5                                                                                 | Annet Mary                                                              |                                                                                     |                                                                                                                                                                                                                                                                                                                                                                                                                                                                                                                                                                                                                                                                                              |   |                  |                  |            |                  |          |   |                  |          |            |                  |         |   |                  |       |       |                  |            |    |                  |                   |       |                  |             |    |                   |       |    |                   |      |
| 6                                                                                 | Miria                                                                   |                                                                                     |                                                                                                                                                                                                                                                                                                                                                                                                                                                                                                                                                                                                                                                                                              |   |                  |                  |            |                  |          |   |                  |          |            |                  |         |   |                  |       |       |                  |            |    |                  |                   |       |                  |             |    |                   |       |    |                   |      |
| 7                                                                                 | Maureen                                                                 |                                                                                     |                                                                                                                                                                                                                                                                                                                                                                                                                                                                                                                                                                                                                                                                                              |   |                  |                  |            |                  |          |   |                  |          |            |                  |         |   |                  |       |       |                  |            |    |                  |                   |       |                  |             |    |                   |       |    |                   |      |
| 8                                                                                 | Clare                                                                   |                                                                                     |                                                                                                                                                                                                                                                                                                                                                                                                                                                                                                                                                                                                                                                                                              |   |                  |                  |            |                  |          |   |                  |          |            |                  |         |   |                  |       |       |                  |            |    |                  |                   |       |                  |             |    |                   |       |    |                   |      |
| 9                                                                                 | Kelemensia                                                              |                                                                                     |                                                                                                                                                                                                                                                                                                                                                                                                                                                                                                                                                                                                                                                                                              |   |                  |                  |            |                  |          |   |                  |          |            |                  |         |   |                  |       |       |                  |            |    |                  |                   |       |                  |             |    |                   |       |    |                   |      |
| 10                                                                                | Immaculate                                                              |                                                                                     |                                                                                                                                                                                                                                                                                                                                                                                                                                                                                                                                                                                                                                                                                              |   |                  |                  |            |                  |          |   |                  |          |            |                  |         |   |                  |       |       |                  |            |    |                  |                   |       |                  |             |    |                   |       |    |                   |      |
| 11                                                                                | Bosco                                                                   |                                                                                     |                                                                                                                                                                                                                                                                                                                                                                                                                                                                                                                                                                                                                                                                                              |   |                  |                  |            |                  |          |   |                  |          |            |                  |         |   |                  |       |       |                  |            |    |                  |                   |       |                  |             |    |                   |       |    |                   |      |
| 12                                                                                | Enid Kibone                                                             |                                                                                     |                                                                                                                                                                                                                                                                                                                                                                                                                                                                                                                                                                                                                                                                                              |   |                  |                  |            |                  |          |   |                  |          |            |                  |         |   |                  |       |       |                  |            |    |                  |                   |       |                  |             |    |                   |       |    |                   |      |
| 98                                                                                | Other                                                                   |                                                                                     |                                                                                                                                                                                                                                                                                                                                                                                                                                                                                                                                                                                                                                                                                              |   |                  |                  |            |                  |          |   |                  |          |            |                  |         |   |                  |       |       |                  |            |    |                  |                   |       |                  |             |    |                   |       |    |                   |      |
| 142                                                                               | [disnurseother_mat]<br>Show the field ONLY if:<br>[disnurse_mat] = '98' | Specify other nurse:                                                                | text                                                                                                                                                                                                                                                                                                                                                                                                                                                                                                                                                                                                                                                                                         |   |                  |                  |            |                  |          |   |                  |          |            |                  |         |   |                  |       |       |                  |            |    |                  |                   |       |                  |             |    |                   |       |    |                   |      |

|     |                                                                                              |                                                                                                                                                   |                                                                                                                                                                                                                                                                                                                                 |   |          |   |                        |   |                           |    |                |   |                     |    |       |
|-----|----------------------------------------------------------------------------------------------|---------------------------------------------------------------------------------------------------------------------------------------------------|---------------------------------------------------------------------------------------------------------------------------------------------------------------------------------------------------------------------------------------------------------------------------------------------------------------------------------|---|----------|---|------------------------|---|---------------------------|----|----------------|---|---------------------|----|-------|
| 143 | [adm_mat]                                                                                    | Section Header: <i>Maternal Clinical Exam Before Discharge</i><br>Was mother admitted to higher level of care due to complications AFTER delivery | yesno<br><table border="1"> <tr> <td>1</td> <td>Yes</td> </tr> <tr> <td>0</td> <td>No</td> </tr> </table>                                                                                                                                                                                                                       | 1 | Yes      | 0 | No                     |   |                           |    |                |   |                     |    |       |
| 1   | Yes                                                                                          |                                                                                                                                                   |                                                                                                                                                                                                                                                                                                                                 |   |          |   |                        |   |                           |    |                |   |                     |    |       |
| 0   | No                                                                                           |                                                                                                                                                   |                                                                                                                                                                                                                                                                                                                                 |   |          |   |                        |   |                           |    |                |   |                     |    |       |
| 144 | [dischstat_mat]                                                                              | Discharge status                                                                                                                                  | dropdown<br><table border="1"> <tr> <td>1</td> <td>Routine</td> </tr> <tr> <td>2</td> <td>Against medical advice</td> </tr> <tr> <td>3</td> <td>Died</td> </tr> <tr> <td>99</td> <td>Other</td> </tr> </table>                                                                                                                  | 1 | Routine  | 2 | Against medical advice | 3 | Died                      | 99 | Other          |   |                     |    |       |
| 1   | Routine                                                                                      |                                                                                                                                                   |                                                                                                                                                                                                                                                                                                                                 |   |          |   |                        |   |                           |    |                |   |                     |    |       |
| 2   | Against medical advice                                                                       |                                                                                                                                                   |                                                                                                                                                                                                                                                                                                                                 |   |          |   |                        |   |                           |    |                |   |                     |    |       |
| 3   | Died                                                                                         |                                                                                                                                                   |                                                                                                                                                                                                                                                                                                                                 |   |          |   |                        |   |                           |    |                |   |                     |    |       |
| 99  | Other                                                                                        |                                                                                                                                                   |                                                                                                                                                                                                                                                                                                                                 |   |          |   |                        |   |                           |    |                |   |                     |    |       |
| 145 | [sbp_mat]<br>Show the field ONLY if:<br>[dischstat_mat] != '3'                               | Discharge systolic blood pressure                                                                                                                 | text (integer)                                                                                                                                                                                                                                                                                                                  |   |          |   |                        |   |                           |    |                |   |                     |    |       |
| 146 | [dbp_mat]<br>Show the field ONLY if:<br>[dischstat_mat] != '3'                               | Discharge diastolic blood pressure                                                                                                                | text (integer)                                                                                                                                                                                                                                                                                                                  |   |          |   |                        |   |                           |    |                |   |                     |    |       |
| 147 | [rr_mat]<br>Show the field ONLY if:<br>[dischstat_mat] != '3'                                | Respiratory rate                                                                                                                                  | text (integer)                                                                                                                                                                                                                                                                                                                  |   |          |   |                        |   |                           |    |                |   |                     |    |       |
| 148 | [temp_mat]<br>Show the field ONLY if:<br>[dischstat_mat] != '3'                              | Temporal artery temperature                                                                                                                       | text (number_1dp, Min: 36, Max: 41)                                                                                                                                                                                                                                                                                             |   |          |   |                        |   |                           |    |                |   |                     |    |       |
| 149 | [best_spo2_mat]<br>Show the field ONLY if:<br>[dischstat_mat] != '3'                         | Best SpO2                                                                                                                                         | text (integer, Min: 60, Max: 100)                                                                                                                                                                                                                                                                                               |   |          |   |                        |   |                           |    |                |   |                     |    |       |
| 150 | [best_hr_mat]<br>Show the field ONLY if:<br>[dischstat_mat] != '3'                           | Best Heart rate                                                                                                                                   | text (integer)                                                                                                                                                                                                                                                                                                                  |   |          |   |                        |   |                           |    |                |   |                     |    |       |
| 151 | [best_oxyradg_mat]<br>Show the field ONLY if:<br>[dischstat_mat] != '3' and [site_adm] = '2' | Rad-G: Best SpO2 from Rad-G                                                                                                                       | text (integer, Min: 60, Max: 100)                                                                                                                                                                                                                                                                                               |   |          |   |                        |   |                           |    |                |   |                     |    |       |
| 152 | [best_hrradg_mat]<br>Show the field ONLY if:<br>[dischstat_mat] != '3' and [site_adm] = '2'  | Rad-G: best heart rate (PR) from Rad-G                                                                                                            | text (integer)                                                                                                                                                                                                                                                                                                                  |   |          |   |                        |   |                           |    |                |   |                     |    |       |
| 153 | [tempradg_mat]<br>Show the field ONLY if:<br>[dischstat_mat] != '3' and [site_adm] = '2'     | Rad-G: Temporal artery temperature from Rad-G                                                                                                     | text (number_1dp, Min: 36, Max: 41)                                                                                                                                                                                                                                                                                             |   |          |   |                        |   |                           |    |                |   |                     |    |       |
| 154 | [rrradg_mat]<br>Show the field ONLY if:<br>[dischstat_mat] != '3' and [site_adm] = '2'       | Rad-G: Respiratory rate (RRp) from Rad-G                                                                                                          | text (integer)                                                                                                                                                                                                                                                                                                                  |   |          |   |                        |   |                           |    |                |   |                     |    |       |
| 155 | [hem_mat]<br>Show the field ONLY if:<br>[dischstat_mat] != '3'                               | Hematocrit (%)                                                                                                                                    | text (integer)                                                                                                                                                                                                                                                                                                                  |   |          |   |                        |   |                           |    |                |   |                     |    |       |
| 156 | [destination_mat]<br>Show the field ONLY if:<br>[dischstat_mat] != '3'                       | Discharge destination                                                                                                                             | dropdown<br><table border="1"> <tr> <td>1</td> <td>Own home</td> </tr> <tr> <td>2</td> <td>Home of relative</td> </tr> <tr> <td>3</td> <td>Home of parent (of woman)</td> </tr> <tr> <td>4</td> <td>Home of friend</td> </tr> <tr> <td>5</td> <td>Mother not yet sure</td> </tr> <tr> <td>98</td> <td>Other</td> </tr> </table> | 1 | Own home | 2 | Home of relative       | 3 | Home of parent (of woman) | 4  | Home of friend | 5 | Mother not yet sure | 98 | Other |
| 1   | Own home                                                                                     |                                                                                                                                                   |                                                                                                                                                                                                                                                                                                                                 |   |          |   |                        |   |                           |    |                |   |                     |    |       |
| 2   | Home of relative                                                                             |                                                                                                                                                   |                                                                                                                                                                                                                                                                                                                                 |   |          |   |                        |   |                           |    |                |   |                     |    |       |
| 3   | Home of parent (of woman)                                                                    |                                                                                                                                                   |                                                                                                                                                                                                                                                                                                                                 |   |          |   |                        |   |                           |    |                |   |                     |    |       |
| 4   | Home of friend                                                                               |                                                                                                                                                   |                                                                                                                                                                                                                                                                                                                                 |   |          |   |                        |   |                           |    |                |   |                     |    |       |
| 5   | Mother not yet sure                                                                          |                                                                                                                                                   |                                                                                                                                                                                                                                                                                                                                 |   |          |   |                        |   |                           |    |                |   |                     |    |       |
| 98  | Other                                                                                        |                                                                                                                                                   |                                                                                                                                                                                                                                                                                                                                 |   |          |   |                        |   |                           |    |                |   |                     |    |       |
| 157 | [dischdate_mat]                                                                              | Date of discharge                                                                                                                                 | text (date_dmy)                                                                                                                                                                                                                                                                                                                 |   |          |   |                        |   |                           |    |                |   |                     |    |       |
| 158 | [deathdate_mat]                                                                              | (Temporary) Date of death                                                                                                                         | text                                                                                                                                                                                                                                                                                                                            |   |          |   |                        |   |                           |    |                |   |                     |    |       |

|     |                                                                     |                                                                                                                  |                                                                                                                                                                                                                                                                                                                                                                                                                                                                                                                                                                                                                                                                                                                                                                                                                                                                                                                                                                               |   |                |                                                                        |    |                |                                                          |   |                |                                           |    |                |                                     |   |                |                      |    |                 |                                  |   |             |                                 |   |             |            |   |             |       |    |              |                             |    |              |      |
|-----|---------------------------------------------------------------------|------------------------------------------------------------------------------------------------------------------|-------------------------------------------------------------------------------------------------------------------------------------------------------------------------------------------------------------------------------------------------------------------------------------------------------------------------------------------------------------------------------------------------------------------------------------------------------------------------------------------------------------------------------------------------------------------------------------------------------------------------------------------------------------------------------------------------------------------------------------------------------------------------------------------------------------------------------------------------------------------------------------------------------------------------------------------------------------------------------|---|----------------|------------------------------------------------------------------------|----|----------------|----------------------------------------------------------|---|----------------|-------------------------------------------|----|----------------|-------------------------------------|---|----------------|----------------------|----|-----------------|----------------------------------|---|-------------|---------------------------------|---|-------------|------------|---|-------------|-------|----|--------------|-----------------------------|----|--------------|------|
| 159 | [disctime_mat]<br>Show the field ONLY if:<br>[dischstat_mat] != '3' | Time of discharge (USE 24 HOUR TIME)                                                                             | text (time)                                                                                                                                                                                                                                                                                                                                                                                                                                                                                                                                                                                                                                                                                                                                                                                                                                                                                                                                                                   |   |                |                                                                        |    |                |                                                          |   |                |                                           |    |                |                                     |   |                |                      |    |                 |                                  |   |             |                                 |   |             |            |   |             |       |    |              |                             |    |              |      |
| 160 | [support_mat]<br>Show the field ONLY if:<br>[dischstat_mat] != '3'  | Please indicate all those from whom you have substantial support at home after discharge (choose all that apply) | checkbox<br><table border="1"> <tr> <td>1</td> <td>support_mat__1</td> <td>Mother</td> </tr> <tr> <td>2</td> <td>support_mat__2</td> <td>Mother-in-law</td> </tr> <tr> <td>3</td> <td>support_mat__3</td> <td>Husband/partner/father</td> </tr> <tr> <td>4</td> <td>support_mat__4</td> <td>Other relative (sister/cousin, etc)</td> </tr> <tr> <td>5</td> <td>support_mat__5</td> <td>Friend</td> </tr> <tr> <td>99</td> <td>support_mat__99</td> <td>No substantial support at home</td> </tr> </table>                                                                                                                                                                                                                                                                                                                                                                                                                                                                     | 1 | support_mat__1 | Mother                                                                 | 2  | support_mat__2 | Mother-in-law                                            | 3 | support_mat__3 | Husband/partner/father                    | 4  | support_mat__4 | Other relative (sister/cousin, etc) | 5 | support_mat__5 | Friend               | 99 | support_mat__99 | No substantial support at home   |   |             |                                 |   |             |            |   |             |       |    |              |                             |    |              |      |
| 1   | support_mat__1                                                      | Mother                                                                                                           |                                                                                                                                                                                                                                                                                                                                                                                                                                                                                                                                                                                                                                                                                                                                                                                                                                                                                                                                                                               |   |                |                                                                        |    |                |                                                          |   |                |                                           |    |                |                                     |   |                |                      |    |                 |                                  |   |             |                                 |   |             |            |   |             |       |    |              |                             |    |              |      |
| 2   | support_mat__2                                                      | Mother-in-law                                                                                                    |                                                                                                                                                                                                                                                                                                                                                                                                                                                                                                                                                                                                                                                                                                                                                                                                                                                                                                                                                                               |   |                |                                                                        |    |                |                                                          |   |                |                                           |    |                |                                     |   |                |                      |    |                 |                                  |   |             |                                 |   |             |            |   |             |       |    |              |                             |    |              |      |
| 3   | support_mat__3                                                      | Husband/partner/father                                                                                           |                                                                                                                                                                                                                                                                                                                                                                                                                                                                                                                                                                                                                                                                                                                                                                                                                                                                                                                                                                               |   |                |                                                                        |    |                |                                                          |   |                |                                           |    |                |                                     |   |                |                      |    |                 |                                  |   |             |                                 |   |             |            |   |             |       |    |              |                             |    |              |      |
| 4   | support_mat__4                                                      | Other relative (sister/cousin, etc)                                                                              |                                                                                                                                                                                                                                                                                                                                                                                                                                                                                                                                                                                                                                                                                                                                                                                                                                                                                                                                                                               |   |                |                                                                        |    |                |                                                          |   |                |                                           |    |                |                                     |   |                |                      |    |                 |                                  |   |             |                                 |   |             |            |   |             |       |    |              |                             |    |              |      |
| 5   | support_mat__5                                                      | Friend                                                                                                           |                                                                                                                                                                                                                                                                                                                                                                                                                                                                                                                                                                                                                                                                                                                                                                                                                                                                                                                                                                               |   |                |                                                                        |    |                |                                                          |   |                |                                           |    |                |                                     |   |                |                      |    |                 |                                  |   |             |                                 |   |             |            |   |             |       |    |              |                             |    |              |      |
| 99  | support_mat__99                                                     | No substantial support at home                                                                                   |                                                                                                                                                                                                                                                                                                                                                                                                                                                                                                                                                                                                                                                                                                                                                                                                                                                                                                                                                                               |   |                |                                                                        |    |                |                                                          |   |                |                                           |    |                |                                     |   |                |                      |    |                 |                                  |   |             |                                 |   |             |            |   |             |       |    |              |                             |    |              |      |
| 161 | [bf_mat]<br>Show the field ONLY if:<br>[dischstat_mat] != '3'       | Any prior history of poor milk production?                                                                       | dropdown<br><table border="1"> <tr> <td>1</td> <td>Yes</td> </tr> <tr> <td>2</td> <td>No</td> </tr> <tr> <td>3</td> <td>Not Applicable (first baby)</td> </tr> </table>                                                                                                                                                                                                                                                                                                                                                                                                                                                                                                                                                                                                                                                                                                                                                                                                       | 1 | Yes            | 2                                                                      | No | 3              | Not Applicable (first baby)                              |   |                |                                           |    |                |                                     |   |                |                      |    |                 |                                  |   |             |                                 |   |             |            |   |             |       |    |              |                             |    |              |      |
| 1   | Yes                                                                 |                                                                                                                  |                                                                                                                                                                                                                                                                                                                                                                                                                                                                                                                                                                                                                                                                                                                                                                                                                                                                                                                                                                               |   |                |                                                                        |    |                |                                                          |   |                |                                           |    |                |                                     |   |                |                      |    |                 |                                  |   |             |                                 |   |             |            |   |             |       |    |              |                             |    |              |      |
| 2   | No                                                                  |                                                                                                                  |                                                                                                                                                                                                                                                                                                                                                                                                                                                                                                                                                                                                                                                                                                                                                                                                                                                                                                                                                                               |   |                |                                                                        |    |                |                                                          |   |                |                                           |    |                |                                     |   |                |                      |    |                 |                                  |   |             |                                 |   |             |            |   |             |       |    |              |                             |    |              |      |
| 3   | Not Applicable (first baby)                                         |                                                                                                                  |                                                                                                                                                                                                                                                                                                                                                                                                                                                                                                                                                                                                                                                                                                                                                                                                                                                                                                                                                                               |   |                |                                                                        |    |                |                                                          |   |                |                                           |    |                |                                     |   |                |                      |    |                 |                                  |   |             |                                 |   |             |            |   |             |       |    |              |                             |    |              |      |
| 162 | [symp_mat]<br>Show the field ONLY if:<br>[dischstat_mat] != '3'     | Symptoms currently present (check all that apply)                                                                | checkbox<br><table border="1"> <tr> <td>1</td> <td>symp_mat__1</td> <td>Headache (continuous pain in the front of the head or behind the eyes)</td> </tr> <tr> <td>2</td> <td>symp_mat__2</td> <td>Visual changes (spots, flashing lights or blurry vision)</td> </tr> <tr> <td>3</td> <td>symp_mat__3</td> <td>Chest pain (causing difficulty breathing)</td> </tr> <tr> <td>4</td> <td>symp_mat__4</td> <td>Shortness of breath</td> </tr> <tr> <td>5</td> <td>symp_mat__5</td> <td>Nausea with vomiting</td> </tr> <tr> <td>6</td> <td>symp_mat__6</td> <td>Abdominal pain on the right side</td> </tr> <tr> <td>7</td> <td>symp_mat__7</td> <td>Foul smelling vaginal discharge</td> </tr> <tr> <td>8</td> <td>symp_mat__8</td> <td>Stiff neck</td> </tr> <tr> <td>9</td> <td>symp_mat__9</td> <td>Cough</td> </tr> <tr> <td>10</td> <td>symp_mat__10</td> <td>Difficulty emptying bladder</td> </tr> <tr> <td>99</td> <td>symp_mat__99</td> <td>None</td> </tr> </table> | 1 | symp_mat__1    | Headache (continuous pain in the front of the head or behind the eyes) | 2  | symp_mat__2    | Visual changes (spots, flashing lights or blurry vision) | 3 | symp_mat__3    | Chest pain (causing difficulty breathing) | 4  | symp_mat__4    | Shortness of breath                 | 5 | symp_mat__5    | Nausea with vomiting | 6  | symp_mat__6     | Abdominal pain on the right side | 7 | symp_mat__7 | Foul smelling vaginal discharge | 8 | symp_mat__8 | Stiff neck | 9 | symp_mat__9 | Cough | 10 | symp_mat__10 | Difficulty emptying bladder | 99 | symp_mat__99 | None |
| 1   | symp_mat__1                                                         | Headache (continuous pain in the front of the head or behind the eyes)                                           |                                                                                                                                                                                                                                                                                                                                                                                                                                                                                                                                                                                                                                                                                                                                                                                                                                                                                                                                                                               |   |                |                                                                        |    |                |                                                          |   |                |                                           |    |                |                                     |   |                |                      |    |                 |                                  |   |             |                                 |   |             |            |   |             |       |    |              |                             |    |              |      |
| 2   | symp_mat__2                                                         | Visual changes (spots, flashing lights or blurry vision)                                                         |                                                                                                                                                                                                                                                                                                                                                                                                                                                                                                                                                                                                                                                                                                                                                                                                                                                                                                                                                                               |   |                |                                                                        |    |                |                                                          |   |                |                                           |    |                |                                     |   |                |                      |    |                 |                                  |   |             |                                 |   |             |            |   |             |       |    |              |                             |    |              |      |
| 3   | symp_mat__3                                                         | Chest pain (causing difficulty breathing)                                                                        |                                                                                                                                                                                                                                                                                                                                                                                                                                                                                                                                                                                                                                                                                                                                                                                                                                                                                                                                                                               |   |                |                                                                        |    |                |                                                          |   |                |                                           |    |                |                                     |   |                |                      |    |                 |                                  |   |             |                                 |   |             |            |   |             |       |    |              |                             |    |              |      |
| 4   | symp_mat__4                                                         | Shortness of breath                                                                                              |                                                                                                                                                                                                                                                                                                                                                                                                                                                                                                                                                                                                                                                                                                                                                                                                                                                                                                                                                                               |   |                |                                                                        |    |                |                                                          |   |                |                                           |    |                |                                     |   |                |                      |    |                 |                                  |   |             |                                 |   |             |            |   |             |       |    |              |                             |    |              |      |
| 5   | symp_mat__5                                                         | Nausea with vomiting                                                                                             |                                                                                                                                                                                                                                                                                                                                                                                                                                                                                                                                                                                                                                                                                                                                                                                                                                                                                                                                                                               |   |                |                                                                        |    |                |                                                          |   |                |                                           |    |                |                                     |   |                |                      |    |                 |                                  |   |             |                                 |   |             |            |   |             |       |    |              |                             |    |              |      |
| 6   | symp_mat__6                                                         | Abdominal pain on the right side                                                                                 |                                                                                                                                                                                                                                                                                                                                                                                                                                                                                                                                                                                                                                                                                                                                                                                                                                                                                                                                                                               |   |                |                                                                        |    |                |                                                          |   |                |                                           |    |                |                                     |   |                |                      |    |                 |                                  |   |             |                                 |   |             |            |   |             |       |    |              |                             |    |              |      |
| 7   | symp_mat__7                                                         | Foul smelling vaginal discharge                                                                                  |                                                                                                                                                                                                                                                                                                                                                                                                                                                                                                                                                                                                                                                                                                                                                                                                                                                                                                                                                                               |   |                |                                                                        |    |                |                                                          |   |                |                                           |    |                |                                     |   |                |                      |    |                 |                                  |   |             |                                 |   |             |            |   |             |       |    |              |                             |    |              |      |
| 8   | symp_mat__8                                                         | Stiff neck                                                                                                       |                                                                                                                                                                                                                                                                                                                                                                                                                                                                                                                                                                                                                                                                                                                                                                                                                                                                                                                                                                               |   |                |                                                                        |    |                |                                                          |   |                |                                           |    |                |                                     |   |                |                      |    |                 |                                  |   |             |                                 |   |             |            |   |             |       |    |              |                             |    |              |      |
| 9   | symp_mat__9                                                         | Cough                                                                                                            |                                                                                                                                                                                                                                                                                                                                                                                                                                                                                                                                                                                                                                                                                                                                                                                                                                                                                                                                                                               |   |                |                                                                        |    |                |                                                          |   |                |                                           |    |                |                                     |   |                |                      |    |                 |                                  |   |             |                                 |   |             |            |   |             |       |    |              |                             |    |              |      |
| 10  | symp_mat__10                                                        | Difficulty emptying bladder                                                                                      |                                                                                                                                                                                                                                                                                                                                                                                                                                                                                                                                                                                                                                                                                                                                                                                                                                                                                                                                                                               |   |                |                                                                        |    |                |                                                          |   |                |                                           |    |                |                                     |   |                |                      |    |                 |                                  |   |             |                                 |   |             |            |   |             |       |    |              |                             |    |              |      |
| 99  | symp_mat__99                                                        | None                                                                                                             |                                                                                                                                                                                                                                                                                                                                                                                                                                                                                                                                                                                                                                                                                                                                                                                                                                                                                                                                                                               |   |                |                                                                        |    |                |                                                          |   |                |                                           |    |                |                                     |   |                |                      |    |                 |                                  |   |             |                                 |   |             |            |   |             |       |    |              |                             |    |              |      |
| 163 | [abx_mat]                                                           | During this admission was woman given antibiotics?                                                               | checkbox<br><table border="1"> <tr> <td>1</td> <td>abx_mat__1</td> <td>Yes - oral antibiotics</td> </tr> <tr> <td>2</td> <td>abx_mat__2</td> <td>Yes - IV antibiotics</td> </tr> <tr> <td>3</td> <td>abx_mat__3</td> <td>No antibiotics</td> </tr> <tr> <td>99</td> <td>abx_mat__99</td> <td>Not sure</td> </tr> </table>                                                                                                                                                                                                                                                                                                                                                                                                                                                                                                                                                                                                                                                     | 1 | abx_mat__1     | Yes - oral antibiotics                                                 | 2  | abx_mat__2     | Yes - IV antibiotics                                     | 3 | abx_mat__3     | No antibiotics                            | 99 | abx_mat__99    | Not sure                            |   |                |                      |    |                 |                                  |   |             |                                 |   |             |            |   |             |       |    |              |                             |    |              |      |
| 1   | abx_mat__1                                                          | Yes - oral antibiotics                                                                                           |                                                                                                                                                                                                                                                                                                                                                                                                                                                                                                                                                                                                                                                                                                                                                                                                                                                                                                                                                                               |   |                |                                                                        |    |                |                                                          |   |                |                                           |    |                |                                     |   |                |                      |    |                 |                                  |   |             |                                 |   |             |            |   |             |       |    |              |                             |    |              |      |
| 2   | abx_mat__2                                                          | Yes - IV antibiotics                                                                                             |                                                                                                                                                                                                                                                                                                                                                                                                                                                                                                                                                                                                                                                                                                                                                                                                                                                                                                                                                                               |   |                |                                                                        |    |                |                                                          |   |                |                                           |    |                |                                     |   |                |                      |    |                 |                                  |   |             |                                 |   |             |            |   |             |       |    |              |                             |    |              |      |
| 3   | abx_mat__3                                                          | No antibiotics                                                                                                   |                                                                                                                                                                                                                                                                                                                                                                                                                                                                                                                                                                                                                                                                                                                                                                                                                                                                                                                                                                               |   |                |                                                                        |    |                |                                                          |   |                |                                           |    |                |                                     |   |                |                      |    |                 |                                  |   |             |                                 |   |             |            |   |             |       |    |              |                             |    |              |      |
| 99  | abx_mat__99                                                         | Not sure                                                                                                         |                                                                                                                                                                                                                                                                                                                                                                                                                                                                                                                                                                                                                                                                                                                                                                                                                                                                                                                                                                               |   |                |                                                                        |    |                |                                                          |   |                |                                           |    |                |                                     |   |                |                      |    |                 |                                  |   |             |                                 |   |             |            |   |             |       |    |              |                             |    |              |      |
| 164 | [followup_date_mat]                                                 | Scheduled follow-up date (for phone follow-up with research team)                                                | text (date_dmy)                                                                                                                                                                                                                                                                                                                                                                                                                                                                                                                                                                                                                                                                                                                                                                                                                                                                                                                                                               |   |                |                                                                        |    |                |                                                          |   |                |                                           |    |                |                                     |   |                |                      |    |                 |                                  |   |             |                                 |   |             |            |   |             |       |    |              |                             |    |              |      |
| 165 | [comment_mat]                                                       | Comment                                                                                                          | notes                                                                                                                                                                                                                                                                                                                                                                                                                                                                                                                                                                                                                                                                                                                                                                                                                                                                                                                                                                         |   |                |                                                                        |    |                |                                                          |   |                |                                           |    |                |                                     |   |                |                      |    |                 |                                  |   |             |                                 |   |             |            |   |             |       |    |              |                             |    |              |      |
| 166 | [best_sqi_mat]                                                      | Section Header: <i>HIDDEN SYSTEM SECTION (Please ignore during data entry)</i><br>Best SQI                       | text (integer)                                                                                                                                                                                                                                                                                                                                                                                                                                                                                                                                                                                                                                                                                                                                                                                                                                                                                                                                                                |   |                |                                                                        |    |                |                                                          |   |                |                                           |    |                |                                     |   |                |                      |    |                 |                                  |   |             |                                 |   |             |            |   |             |       |    |              |                             |    |              |      |
| 167 | [best_spo2trends_mat]                                               | Best SpO2 Trends file                                                                                            | file                                                                                                                                                                                                                                                                                                                                                                                                                                                                                                                                                                                                                                                                                                                                                                                                                                                                                                                                                                          |   |                |                                                                        |    |                |                                                          |   |                |                                           |    |                |                                     |   |                |                      |    |                 |                                  |   |             |                                 |   |             |            |   |             |       |    |              |                             |    |              |      |
| 168 | [best_spo2raw_mat]                                                  | Best SpO2 Raw bin file                                                                                           | file                                                                                                                                                                                                                                                                                                                                                                                                                                                                                                                                                                                                                                                                                                                                                                                                                                                                                                                                                                          |   |                |                                                                        |    |                |                                                          |   |                |                                           |    |                |                                     |   |                |                      |    |                 |                                  |   |             |                                 |   |             |            |   |             |       |    |              |                             |    |              |      |
| 169 | [add_sqi_mat]                                                       | Additional SQI                                                                                                   | text (integer)                                                                                                                                                                                                                                                                                                                                                                                                                                                                                                                                                                                                                                                                                                                                                                                                                                                                                                                                                                |   |                |                                                                        |    |                |                                                          |   |                |                                           |    |                |                                     |   |                |                      |    |                 |                                  |   |             |                                 |   |             |            |   |             |       |    |              |                             |    |              |      |
| 170 | [add_spo2trends_mat]                                                | Additional SpO2 Trends file                                                                                      | file                                                                                                                                                                                                                                                                                                                                                                                                                                                                                                                                                                                                                                                                                                                                                                                                                                                                                                                                                                          |   |                |                                                                        |    |                |                                                          |   |                |                                           |    |                |                                     |   |                |                      |    |                 |                                  |   |             |                                 |   |             |            |   |             |       |    |              |                             |    |              |      |
| 171 | [add_spo2raw_mat]                                                   | Additional SpO2 Raw bin file                                                                                     | file                                                                                                                                                                                                                                                                                                                                                                                                                                                                                                                                                                                                                                                                                                                                                                                                                                                                                                                                                                          |   |                |                                                                        |    |                |                                                          |   |                |                                           |    |                |                                     |   |                |                      |    |                 |                                  |   |             |                                 |   |             |            |   |             |       |    |              |                             |    |              |      |
| 172 | [rrtaps_mat]                                                        | Respiratory rate taps                                                                                            | notes                                                                                                                                                                                                                                                                                                                                                                                                                                                                                                                                                                                                                                                                                                                                                                                                                                                                                                                                                                         |   |                |                                                                        |    |                |                                                          |   |                |                                           |    |                |                                     |   |                |                      |    |                 |                                  |   |             |                                 |   |             |            |   |             |       |    |              |                             |    |              |      |

|                                                                                   |                                                                                                                           |                                                                                        |                                                                                                                                                                                                                                                                                                                                                                                                                                                                                              |   |                       |        |                    |                       |                |   |                                       |            |                                                         |                       |          |   |                       |                              |    |                        |                 |
|-----------------------------------------------------------------------------------|---------------------------------------------------------------------------------------------------------------------------|----------------------------------------------------------------------------------------|----------------------------------------------------------------------------------------------------------------------------------------------------------------------------------------------------------------------------------------------------------------------------------------------------------------------------------------------------------------------------------------------------------------------------------------------------------------------------------------------|---|-----------------------|--------|--------------------|-----------------------|----------------|---|---------------------------------------|------------|---------------------------------------------------------|-----------------------|----------|---|-----------------------|------------------------------|----|------------------------|-----------------|
| 173                                                                               | [discharge_interview_maternal_complete]                                                                                   | Section Header: <i>Form Status</i><br>Complete?                                        | dropdown<br><table border="1"> <tr><td>0</td><td>Incomplete</td></tr> <tr><td>1</td><td>Unverified</td></tr> <tr><td>2</td><td>Complete</td></tr> </table>                                                                                                                                                                                                                                                                                                                                   | 0 | Incomplete            | 1      | Unverified         | 2                     | Complete       |   |                                       |            |                                                         |                       |          |   |                       |                              |    |                        |                 |
| 0                                                                                 | Incomplete                                                                                                                |                                                                                        |                                                                                                                                                                                                                                                                                                                                                                                                                                                                                              |   |                       |        |                    |                       |                |   |                                       |            |                                                         |                       |          |   |                       |                              |    |                        |                 |
| 1                                                                                 | Unverified                                                                                                                |                                                                                        |                                                                                                                                                                                                                                                                                                                                                                                                                                                                                              |   |                       |        |                    |                       |                |   |                                       |            |                                                         |                       |          |   |                       |                              |    |                        |                 |
| 2                                                                                 | Complete                                                                                                                  |                                                                                        |                                                                                                                                                                                                                                                                                                                                                                                                                                                                                              |   |                       |        |                    |                       |                |   |                                       |            |                                                         |                       |          |   |                       |                              |    |                        |                 |
| Instrument: <b>8. Discharge Interview Neonatal</b> (discharge_interview_neonatal) |                                                                                                                           |                                                                                        |                                                                                                                                                                                                                                                                                                                                                                                                                                                                                              |   |                       |        |                    |                       |                |   |                                       |            |                                                         |                       |          |   |                       |                              |    |                        |                 |
| 174                                                                               | [dispbbs_neo]                                                                                                             | Section Header: <i>Neonatal Clinical Exam Before Discharge</i><br>Disposition of baby? | dropdown<br><table border="1"> <tr><td>1</td><td>Discharged</td></tr> <tr><td>2</td><td>Admitted</td></tr> <tr><td>3</td><td>Died</td></tr> <tr><td>4</td><td>Referred</td></tr> <tr><td>5</td><td>Discharged, but readmitted after study nurse assessment</td></tr> <tr><td>98</td><td>Other</td></tr> </table>                                                                                                                                                                             | 1 | Discharged            | 2      | Admitted           | 3                     | Died           | 4 | Referred                              | 5          | Discharged, but readmitted after study nurse assessment | 98                    | Other    |   |                       |                              |    |                        |                 |
| 1                                                                                 | Discharged                                                                                                                |                                                                                        |                                                                                                                                                                                                                                                                                                                                                                                                                                                                                              |   |                       |        |                    |                       |                |   |                                       |            |                                                         |                       |          |   |                       |                              |    |                        |                 |
| 2                                                                                 | Admitted                                                                                                                  |                                                                                        |                                                                                                                                                                                                                                                                                                                                                                                                                                                                                              |   |                       |        |                    |                       |                |   |                                       |            |                                                         |                       |          |   |                       |                              |    |                        |                 |
| 3                                                                                 | Died                                                                                                                      |                                                                                        |                                                                                                                                                                                                                                                                                                                                                                                                                                                                                              |   |                       |        |                    |                       |                |   |                                       |            |                                                         |                       |          |   |                       |                              |    |                        |                 |
| 4                                                                                 | Referred                                                                                                                  |                                                                                        |                                                                                                                                                                                                                                                                                                                                                                                                                                                                                              |   |                       |        |                    |                       |                |   |                                       |            |                                                         |                       |          |   |                       |                              |    |                        |                 |
| 5                                                                                 | Discharged, but readmitted after study nurse assessment                                                                   |                                                                                        |                                                                                                                                                                                                                                                                                                                                                                                                                                                                                              |   |                       |        |                    |                       |                |   |                                       |            |                                                         |                       |          |   |                       |                              |    |                        |                 |
| 98                                                                                | Other                                                                                                                     |                                                                                        |                                                                                                                                                                                                                                                                                                                                                                                                                                                                                              |   |                       |        |                    |                       |                |   |                                       |            |                                                         |                       |          |   |                       |                              |    |                        |                 |
| 175                                                                               | [dispbbs_other_neo]<br>Show the field ONLY if:<br>[dispbbs_neo] = '98'                                                    | Specify other:                                                                         | text                                                                                                                                                                                                                                                                                                                                                                                                                                                                                         |   |                       |        |                    |                       |                |   |                                       |            |                                                         |                       |          |   |                       |                              |    |                        |                 |
| 176                                                                               | [dispsdate_neo]                                                                                                           | Disposition date                                                                       | text (date_dmy)                                                                                                                                                                                                                                                                                                                                                                                                                                                                              |   |                       |        |                    |                       |                |   |                                       |            |                                                         |                       |          |   |                       |                              |    |                        |                 |
| 177                                                                               | [admitsite_neo]<br>Show the field ONLY if:<br>[dispbbs_neo] <> " and [dispbbs_neo] <> '1' and [dispbbs_neo] <> '3'        | Where was the child admitted?                                                          | dropdown<br><table border="1"> <tr><td>1</td><td>Delivery hospital</td></tr> <tr><td>2</td><td>Different hospital</td></tr> </table>                                                                                                                                                                                                                                                                                                                                                         | 1 | Delivery hospital     | 2      | Different hospital |                       |                |   |                                       |            |                                                         |                       |          |   |                       |                              |    |                        |                 |
| 1                                                                                 | Delivery hospital                                                                                                         |                                                                                        |                                                                                                                                                                                                                                                                                                                                                                                                                                                                                              |   |                       |        |                    |                       |                |   |                                       |            |                                                         |                       |          |   |                       |                              |    |                        |                 |
| 2                                                                                 | Different hospital                                                                                                        |                                                                                        |                                                                                                                                                                                                                                                                                                                                                                                                                                                                                              |   |                       |        |                    |                       |                |   |                                       |            |                                                         |                       |          |   |                       |                              |    |                        |                 |
| 178                                                                               | [admitdisposition_neo]<br>Show the field ONLY if:<br>[dispbbs_neo] <> " and [dispbbs_neo] <> '1' and [dispbbs_neo] <> '3' | Admission disposition                                                                  | dropdown<br><table border="1"> <tr><td>1</td><td>Died</td></tr> <tr><td>2</td><td>Discharged</td></tr> <tr><td>3</td><td>Referred</td></tr> <tr><td>4</td><td>Discharge against medical advice/fled</td></tr> </table>                                                                                                                                                                                                                                                                       | 1 | Died                  | 2      | Discharged         | 3                     | Referred       | 4 | Discharge against medical advice/fled |            |                                                         |                       |          |   |                       |                              |    |                        |                 |
| 1                                                                                 | Died                                                                                                                      |                                                                                        |                                                                                                                                                                                                                                                                                                                                                                                                                                                                                              |   |                       |        |                    |                       |                |   |                                       |            |                                                         |                       |          |   |                       |                              |    |                        |                 |
| 2                                                                                 | Discharged                                                                                                                |                                                                                        |                                                                                                                                                                                                                                                                                                                                                                                                                                                                                              |   |                       |        |                    |                       |                |   |                                       |            |                                                         |                       |          |   |                       |                              |    |                        |                 |
| 3                                                                                 | Referred                                                                                                                  |                                                                                        |                                                                                                                                                                                                                                                                                                                                                                                                                                                                                              |   |                       |        |                    |                       |                |   |                                       |            |                                                         |                       |          |   |                       |                              |    |                        |                 |
| 4                                                                                 | Discharge against medical advice/fled                                                                                     |                                                                                        |                                                                                                                                                                                                                                                                                                                                                                                                                                                                                              |   |                       |        |                    |                       |                |   |                                       |            |                                                         |                       |          |   |                       |                              |    |                        |                 |
| 179                                                                               | [admitdispsdate_neo]<br>Show the field ONLY if:<br>[dispbbs_neo] <> " and [dispbbs_neo] <> '1' and [dispbbs_neo] <> '3'   | Admission disposition date                                                             | text (date_dmy)                                                                                                                                                                                                                                                                                                                                                                                                                                                                              |   |                       |        |                    |                       |                |   |                                       |            |                                                         |                       |          |   |                       |                              |    |                        |                 |
| 180                                                                               | [admitdiagnosis_neo]<br>Show the field ONLY if:<br>[dispbbs_neo] <> " and [dispbbs_neo] <> '1' and [dispbbs_neo] <> '3'   | Admission diagnosis                                                                    | checkbox<br><table border="1"> <tr><td>1</td><td>admitdiagnosis_neo__1</td><td>Sepsis</td></tr> <tr><td>2</td><td>admitdiagnosis_neo__2</td><td>Birth Asphyxia</td></tr> <tr><td>3</td><td>admitdiagnosis_neo__3</td><td>Congenital</td></tr> <tr><td>4</td><td>admitdiagnosis_neo__4</td><td>Jaundice</td></tr> <tr><td>5</td><td>admitdiagnosis_neo__5</td><td>prematurity/low birth weight</td></tr> <tr><td>99</td><td>admitdiagnosis_neo__99</td><td>Other (specify)</td></tr> </table> | 1 | admitdiagnosis_neo__1 | Sepsis | 2                  | admitdiagnosis_neo__2 | Birth Asphyxia | 3 | admitdiagnosis_neo__3                 | Congenital | 4                                                       | admitdiagnosis_neo__4 | Jaundice | 5 | admitdiagnosis_neo__5 | prematurity/low birth weight | 99 | admitdiagnosis_neo__99 | Other (specify) |
| 1                                                                                 | admitdiagnosis_neo__1                                                                                                     | Sepsis                                                                                 |                                                                                                                                                                                                                                                                                                                                                                                                                                                                                              |   |                       |        |                    |                       |                |   |                                       |            |                                                         |                       |          |   |                       |                              |    |                        |                 |
| 2                                                                                 | admitdiagnosis_neo__2                                                                                                     | Birth Asphyxia                                                                         |                                                                                                                                                                                                                                                                                                                                                                                                                                                                                              |   |                       |        |                    |                       |                |   |                                       |            |                                                         |                       |          |   |                       |                              |    |                        |                 |
| 3                                                                                 | admitdiagnosis_neo__3                                                                                                     | Congenital                                                                             |                                                                                                                                                                                                                                                                                                                                                                                                                                                                                              |   |                       |        |                    |                       |                |   |                                       |            |                                                         |                       |          |   |                       |                              |    |                        |                 |
| 4                                                                                 | admitdiagnosis_neo__4                                                                                                     | Jaundice                                                                               |                                                                                                                                                                                                                                                                                                                                                                                                                                                                                              |   |                       |        |                    |                       |                |   |                                       |            |                                                         |                       |          |   |                       |                              |    |                        |                 |
| 5                                                                                 | admitdiagnosis_neo__5                                                                                                     | prematurity/low birth weight                                                           |                                                                                                                                                                                                                                                                                                                                                                                                                                                                                              |   |                       |        |                    |                       |                |   |                                       |            |                                                         |                       |          |   |                       |                              |    |                        |                 |
| 99                                                                                | admitdiagnosis_neo__99                                                                                                    | Other (specify)                                                                        |                                                                                                                                                                                                                                                                                                                                                                                                                                                                                              |   |                       |        |                    |                       |                |   |                                       |            |                                                         |                       |          |   |                       |                              |    |                        |                 |
| 181                                                                               | [admitdiagnosisother_neo]<br>Show the field ONLY if:<br>[admitdiagnosis_neo(99)] = '1'                                    | Other admission diagnosis:                                                             | text                                                                                                                                                                                                                                                                                                                                                                                                                                                                                         |   |                       |        |                    |                       |                |   |                                       |            |                                                         |                       |          |   |                       |                              |    |                        |                 |
| 182                                                                               | [babedisch_neo]<br>Show the field ONLY if:<br>[dispbbs_neo] = '1'                                                         | Is the baby being discharged home with mom?                                            | yesno<br><table border="1"> <tr><td>1</td><td>Yes</td></tr> <tr><td>0</td><td>No</td></tr> </table>                                                                                                                                                                                                                                                                                                                                                                                          | 1 | Yes                   | 0      | No                 |                       |                |   |                                       |            |                                                         |                       |          |   |                       |                              |    |                        |                 |
| 1                                                                                 | Yes                                                                                                                       |                                                                                        |                                                                                                                                                                                                                                                                                                                                                                                                                                                                                              |   |                       |        |                    |                       |                |   |                                       |            |                                                         |                       |          |   |                       |                              |    |                        |                 |
| 0                                                                                 | No                                                                                                                        |                                                                                        |                                                                                                                                                                                                                                                                                                                                                                                                                                                                                              |   |                       |        |                    |                       |                |   |                                       |            |                                                         |                       |          |   |                       |                              |    |                        |                 |
| 183                                                                               | [poop_neo]<br>Show the field ONLY if:<br>[babedisch_neo]='1'                                                              | Has your baby pooped?                                                                  | radio<br><table border="1"> <tr><td>1</td><td>Yes</td></tr> <tr><td>2</td><td>No</td></tr> <tr><td>3</td><td>Don't know</td></tr> </table>                                                                                                                                                                                                                                                                                                                                                   | 1 | Yes                   | 2      | No                 | 3                     | Don't know     |   |                                       |            |                                                         |                       |          |   |                       |                              |    |                        |                 |
| 1                                                                                 | Yes                                                                                                                       |                                                                                        |                                                                                                                                                                                                                                                                                                                                                                                                                                                                                              |   |                       |        |                    |                       |                |   |                                       |            |                                                         |                       |          |   |                       |                              |    |                        |                 |
| 2                                                                                 | No                                                                                                                        |                                                                                        |                                                                                                                                                                                                                                                                                                                                                                                                                                                                                              |   |                       |        |                    |                       |                |   |                                       |            |                                                         |                       |          |   |                       |                              |    |                        |                 |
| 3                                                                                 | Don't know                                                                                                                |                                                                                        |                                                                                                                                                                                                                                                                                                                                                                                                                                                                                              |   |                       |        |                    |                       |                |   |                                       |            |                                                         |                       |          |   |                       |                              |    |                        |                 |

|     |                                                                                                |                                                        |                                                                                                                                                   |   |              |   |                 |   |                |
|-----|------------------------------------------------------------------------------------------------|--------------------------------------------------------|---------------------------------------------------------------------------------------------------------------------------------------------------|---|--------------|---|-----------------|---|----------------|
| 184 | [pee_neo]<br>Show the field ONLY if:<br>[babedisch_neo]='1'                                    | Has your baby peed?                                    | radio<br><table border="1"> <tr><td>1</td><td>Yes</td></tr> <tr><td>2</td><td>No</td></tr> <tr><td>3</td><td>Don't know</td></tr> </table>        | 1 | Yes          | 2 | No              | 3 | Don't know     |
| 1   | Yes                                                                                            |                                                        |                                                                                                                                                   |   |              |   |                 |   |                |
| 2   | No                                                                                             |                                                        |                                                                                                                                                   |   |              |   |                 |   |                |
| 3   | Don't know                                                                                     |                                                        |                                                                                                                                                   |   |              |   |                 |   |                |
| 185 | [bf_neo]<br>Show the field ONLY if:<br>[babedisch_neo] = '1'                                   | Is baby latching and suckling well when breastfeeding? | dropdown<br><table border="1"> <tr><td>1</td><td>Yes</td></tr> <tr><td>2</td><td>No</td></tr> </table>                                            | 1 | Yes          | 2 | No              |   |                |
| 1   | Yes                                                                                            |                                                        |                                                                                                                                                   |   |              |   |                 |   |                |
| 2   | No                                                                                             |                                                        |                                                                                                                                                   |   |              |   |                 |   |                |
| 186 | [jaundice_neo]<br>Show the field ONLY if:<br>[babedisch_neo] = '1'                             | Are the baby's eyes yellow?                            | dropdown<br><table border="1"> <tr><td>0</td><td>No</td></tr> <tr><td>1</td><td>Yes</td></tr> <tr><td>2</td><td>Yes (a little)</td></tr> </table> | 0 | No           | 1 | Yes             | 2 | Yes (a little) |
| 0   | No                                                                                             |                                                        |                                                                                                                                                   |   |              |   |                 |   |                |
| 1   | Yes                                                                                            |                                                        |                                                                                                                                                   |   |              |   |                 |   |                |
| 2   | Yes (a little)                                                                                 |                                                        |                                                                                                                                                   |   |              |   |                 |   |                |
| 187 | [eyedischarge_neo]<br>Show the field ONLY if:<br>[babedisch_neo] = '1'                         | Does the baby have a discharge in their eyes?          | yesno<br><table border="1"> <tr><td>1</td><td>Yes</td></tr> <tr><td>0</td><td>No</td></tr> </table>                                               | 1 | Yes          | 0 | No              |   |                |
| 1   | Yes                                                                                            |                                                        |                                                                                                                                                   |   |              |   |                 |   |                |
| 0   | No                                                                                             |                                                        |                                                                                                                                                   |   |              |   |                 |   |                |
| 188 | [temp1_neo]<br>Show the field ONLY if:<br>[babedisch_neo]='1'                                  | Temporal artery temperature 1                          | text (number_1dp, Min: 36, Max: 41)                                                                                                               |   |              |   |                 |   |                |
| 189 | [temp2_neo]<br>Show the field ONLY if:<br>[babedisch_neo]='1'                                  | Temporal artery temperature 2                          | text (number_1dp, Min: 36, Max: 41)                                                                                                               |   |              |   |                 |   |                |
| 190 | [rr_neo]<br>Show the field ONLY if:<br>[babedisch_neo]='1'                                     | Respiratory rate                                       | text (integer)                                                                                                                                    |   |              |   |                 |   |                |
| 191 | [foot_o2src_neo]<br>Show the field ONLY if:<br>[babedisch_neo]='1'                             | Foot Oxygen Saturation Source                          | radio<br><table border="1"> <tr><td>1</td><td>Using tablet</td></tr> <tr><td>2</td><td>Separate device</td></tr> </table>                         | 1 | Using tablet | 2 | Separate device |   |                |
| 1   | Using tablet                                                                                   |                                                        |                                                                                                                                                   |   |              |   |                 |   |                |
| 2   | Separate device                                                                                |                                                        |                                                                                                                                                   |   |              |   |                 |   |                |
| 192 | [foot_best_spo2_neo]<br>Show the field ONLY if:<br>[babedisch_neo]='1'                         | Best Foot SpO2                                         | text (integer, Min: 60, Max: 100)                                                                                                                 |   |              |   |                 |   |                |
| 193 | [foot_best_hr_neo]<br>Show the field ONLY if:<br>[babedisch_neo]='1'                           | Best Foot Heart rate                                   | text (integer)                                                                                                                                    |   |              |   |                 |   |                |
| 194 | [foot_best_oxyradg_neo]<br>Show the field ONLY if:<br>[babedisch_neo]='1' and [site_adm] = '2' | Rad-G: Best Foot SpO2 from Rad-G                       | text (integer, Min: 60, Max: 100)                                                                                                                 |   |              |   |                 |   |                |
| 195 | [foot_best_hrradg_neo]<br>Show the field ONLY if:<br>[babedisch_neo]='1' and [site_adm] = '2'  | Rad-G: Best Foot Heart rate (PR) from Rad-G            | text (integer)                                                                                                                                    |   |              |   |                 |   |                |
| 196 | [tempfootradg_neo]<br>Show the field ONLY if:<br>[babedisch_neo]='1' and [site_adm] = '2'      | Rad-G: Foot Temporal artery temperature from Rad-G     | text (number_1dp, Min: 36, Max: 41)                                                                                                               |   |              |   |                 |   |                |
| 197 | [rrfootradg_neo]<br>Show the field ONLY if:<br>[babedisch_neo]='1' and [site_adm] = '2'        | Rad-G: Foot Respiratory rate (RRp) from Rad-G          | text (integer)                                                                                                                                    |   |              |   |                 |   |                |
| 198 | [rhand_o2src_neo]<br>Show the field ONLY if:<br>[babedisch_neo]='1'                            | Right Hand Oxygen Saturation Source                    | radio<br><table border="1"> <tr><td>1</td><td>Using tablet</td></tr> <tr><td>2</td><td>Separate device</td></tr> </table>                         | 1 | Using tablet | 2 | Separate device |   |                |
| 1   | Using tablet                                                                                   |                                                        |                                                                                                                                                   |   |              |   |                 |   |                |
| 2   | Separate device                                                                                |                                                        |                                                                                                                                                   |   |              |   |                 |   |                |



|     |                                                                                                 |                                                                                                 |                                                                                                           |   |     |   |    |
|-----|-------------------------------------------------------------------------------------------------|-------------------------------------------------------------------------------------------------|-----------------------------------------------------------------------------------------------------------|---|-----|---|----|
| 199 | [rhand_best_spo2_neo]<br>Show the field ONLY if:<br>[babedisch_neo]='1'                         | Best Right Hand SpO2                                                                            | text (integer, Min: 60, Max: 100)                                                                         |   |     |   |    |
| 200 | [rhand_best_hr_neo]<br>Show the field ONLY if:<br>[babedisch_neo]='1'                           | Best Right Hand Heart rate                                                                      | text (integer)                                                                                            |   |     |   |    |
| 201 | [rhand_best_oxyradg_neo]<br>Show the field ONLY if:<br>[babedisch_neo]='1' and [site_adm] = '2' | Rad-G: Best Right Hand SpO2 from Rad-G                                                          | text (integer, Min: 60, Max: 100)                                                                         |   |     |   |    |
| 202 | [rhand_best_hrradg_neo]<br>Show the field ONLY if:<br>[babedisch_neo]='1' and [site_adm] = '2'  | Rad-G: Best Right Hand Heart rate (PR) from Rad-G                                               | text (integer)                                                                                            |   |     |   |    |
| 203 | [temphandradg_neo]<br>Show the field ONLY if:<br>[babedisch_neo]='1' and [site_adm] = '2'       | Rad-G: Hand Temporal artery temperature from Rad-G                                              | text (number_1dp, Min: 36, Max: 41)                                                                       |   |     |   |    |
| 204 | [rrhandradg_neo]<br>Show the field ONLY if:<br>[babedisch_neo]='1' and [site_adm] = '2'         | Rad-G: Hand Respiratory rate (RRp) from Rad-G                                                   | text (integer)                                                                                            |   |     |   |    |
| 205 | [abx_neo]<br>Show the field ONLY if:<br>[babedisch_neo] = '1'                                   | Was the baby discharged on antibiotics?                                                         | yesno<br><table border="1"> <tr> <td>1</td> <td>Yes</td> </tr> <tr> <td>0</td> <td>No</td> </tr> </table> | 1 | Yes | 0 | No |
| 1   | Yes                                                                                             |                                                                                                 |                                                                                                           |   |     |   |    |
| 0   | No                                                                                              |                                                                                                 |                                                                                                           |   |     |   |    |
| 206 | [comment_neo]                                                                                   | Comment                                                                                         | notes                                                                                                     |   |     |   |    |
| 207 | [foot_best_sqi_neo]<br>Show the field ONLY if:<br>[babedisch_neo]='1'                           | Section Header: <i>HIDDEN SYSTEM SECTION (Please ignore during data entry)</i><br>Best Foot SQI | text (integer)                                                                                            |   |     |   |    |
| 208 | [foot_best_spo2trends_neo]<br>Show the field ONLY if:<br>[babedisch_neo]='1'                    | Best Foot SpO2 Trends file                                                                      | file                                                                                                      |   |     |   |    |
| 209 | [foot_best_spo2raw_neo]<br>Show the field ONLY if:<br>[babedisch_neo]='1'                       | Best Foot SpO2 Raw bin file                                                                     | file                                                                                                      |   |     |   |    |
| 210 | [foot_add_sqi_neo]<br>Show the field ONLY if:<br>[babedisch_neo]='1'                            | Additional Foot SQI                                                                             | text (integer)                                                                                            |   |     |   |    |
| 211 | [foot_add_spo2trends_neo]<br>Show the field ONLY if:<br>[babedisch_neo]='1'                     | Additional Foot SpO2 Trends file                                                                | file                                                                                                      |   |     |   |    |
| 212 | [foot_add_spo2raw_neo]<br>Show the field ONLY if:<br>[babedisch_neo]='1'                        | Additional Foot SpO2 Raw bin file                                                               | file                                                                                                      |   |     |   |    |
| 213 | [rhand_best_sqi_neo]<br>Show the field ONLY if:<br>[babedisch_neo]='1'                          | Best Right Hand SQI                                                                             | text (integer)                                                                                            |   |     |   |    |
| 214 | [rhand_best_spo2trends_neo]<br>Show the field ONLY if:<br>[babedisch_neo]='1'                   | Best Right Hand SpO2 Trends file                                                                | file                                                                                                      |   |     |   |    |
| 215 | [rhand_best_spo2raw_neo]<br>Show the field ONLY if:<br>[babedisch_neo]='1'                      | Best Right Hand SpO2 Raw bin file                                                               | file                                                                                                      |   |     |   |    |

|                                                                                  |                                                                              |                                                                                                                                                                                                                                                                                                                                             |                                                                                                                                                                                                                                                                                                                                                                |   |                 |    |               |   |          |   |         |   |        |   |               |   |                       |    |       |
|----------------------------------------------------------------------------------|------------------------------------------------------------------------------|---------------------------------------------------------------------------------------------------------------------------------------------------------------------------------------------------------------------------------------------------------------------------------------------------------------------------------------------|----------------------------------------------------------------------------------------------------------------------------------------------------------------------------------------------------------------------------------------------------------------------------------------------------------------------------------------------------------------|---|-----------------|----|---------------|---|----------|---|---------|---|--------|---|---------------|---|-----------------------|----|-------|
| 216                                                                              | [rhand_add_sqi_neo]<br>Show the field ONLY if:<br>[babedisch_neo]='1'        | Additional Right Hand SQI                                                                                                                                                                                                                                                                                                                   | text (integer)                                                                                                                                                                                                                                                                                                                                                 |   |                 |    |               |   |          |   |         |   |        |   |               |   |                       |    |       |
| 217                                                                              | [rhand_add_spo2trends_neo]<br>Show the field ONLY if:<br>[babedisch_neo]='1' | Additional Right Hand SpO2 Trends file                                                                                                                                                                                                                                                                                                      | file                                                                                                                                                                                                                                                                                                                                                           |   |                 |    |               |   |          |   |         |   |        |   |               |   |                       |    |       |
| 218                                                                              | [rhand_add_spo2raw_neo]<br>Show the field ONLY if:<br>[babedisch_neo]='1'    | Additional Right Hand SpO2 Raw bin file                                                                                                                                                                                                                                                                                                     | file                                                                                                                                                                                                                                                                                                                                                           |   |                 |    |               |   |          |   |         |   |        |   |               |   |                       |    |       |
| 219                                                                              | [rrtaps_neo]<br>Show the field ONLY if:<br>[babedisch_neo]='1'               | Respiratory rate taps                                                                                                                                                                                                                                                                                                                       | notes                                                                                                                                                                                                                                                                                                                                                          |   |                 |    |               |   |          |   |         |   |        |   |               |   |                       |    |       |
| 220                                                                              | [discharge_interview_neonata<br>_complete]                                   | Section Header: <i>Form Status</i><br>Complete?                                                                                                                                                                                                                                                                                             | dropdown<br><table border="1"> <tr><td>0</td><td>Incomplete</td></tr> <tr><td>1</td><td>Unverified</td></tr> <tr><td>2</td><td>Complete</td></tr> </table>                                                                                                                                                                                                     | 0 | Incomplete      | 1  | Unverified    | 2 | Complete |   |         |   |        |   |               |   |                       |    |       |
| 0                                                                                | Incomplete                                                                   |                                                                                                                                                                                                                                                                                                                                             |                                                                                                                                                                                                                                                                                                                                                                |   |                 |    |               |   |          |   |         |   |        |   |               |   |                       |    |       |
| 1                                                                                | Unverified                                                                   |                                                                                                                                                                                                                                                                                                                                             |                                                                                                                                                                                                                                                                                                                                                                |   |                 |    |               |   |          |   |         |   |        |   |               |   |                       |    |       |
| 2                                                                                | Complete                                                                     |                                                                                                                                                                                                                                                                                                                                             |                                                                                                                                                                                                                                                                                                                                                                |   |                 |    |               |   |          |   |         |   |        |   |               |   |                       |    |       |
| Instrument: <b>10. Six Week Follow Up Maternal</b> (six_week_follow_up_maternal) |                                                                              |                                                                                                                                                                                                                                                                                                                                             |                                                                                                                                                                                                                                                                                                                                                                |   |                 |    |               |   |          |   |         |   |        |   |               |   |                       |    |       |
| 221                                                                              | [intro_swf]                                                                  | [firstname_adm_v2] [lastname_adm_v2], DOB:<br>[dob_adm_v2]<br>Admitted at [site_adm] on [admitdate_adm_v2]<br>Discharged on [dischdate_mat]<br>Phone: [phone_adm_v2]<br>Alternative Phone: [otherphone_adm_v2]<br>From [villageresidence_adm_v2] in<br>[parishresidence_adm_v2], [subcountyresidence_adm_v2],<br>[districtresidence_adm_v2] | descriptive                                                                                                                                                                                                                                                                                                                                                    |   |                 |    |               |   |          |   |         |   |        |   |               |   |                       |    |       |
| 222                                                                              | [considerate_swf]<br>Show the field ONLY if:<br>[dischstat_mat] = '3'        | Please be considerate: the woman died in hospital                                                                                                                                                                                                                                                                                           | descriptive                                                                                                                                                                                                                                                                                                                                                    |   |                 |    |               |   |          |   |         |   |        |   |               |   |                       |    |       |
| 223                                                                              | [considerate2_swf]<br>Show the field ONLY if:<br>[dispbb_neo] = '3'          | Please be considerate: one of the delivered babies died in hospital                                                                                                                                                                                                                                                                         | descriptive                                                                                                                                                                                                                                                                                                                                                    |   |                 |    |               |   |          |   |         |   |        |   |               |   |                       |    |       |
| 224                                                                              | [physical_swf]<br>Show the field ONLY if:<br>[dischstat_mat] != '3'          | Check this box if this is a physical (in-person) follow-up                                                                                                                                                                                                                                                                                  | checkbox<br><table border="1"> <tr><td>1</td><td>physical_swf__1</td></tr> </table>                                                                                                                                                                                                                                                                            | 1 | physical_swf__1 |    |               |   |          |   |         |   |        |   |               |   |                       |    |       |
| 1                                                                                | physical_swf__1                                                              |                                                                                                                                                                                                                                                                                                                                             |                                                                                                                                                                                                                                                                                                                                                                |   |                 |    |               |   |          |   |         |   |        |   |               |   |                       |    |       |
| 225                                                                              | [respondent_swf]<br>Show the field ONLY if:<br>[dischstat_mat] != '3'        | Respondent during the interview?                                                                                                                                                                                                                                                                                                            | dropdown<br><table border="1"> <tr><td>1</td><td>Woman herself</td></tr> <tr><td>98</td><td>Other</td></tr> </table>                                                                                                                                                                                                                                           | 1 | Woman herself   | 98 | Other         |   |          |   |         |   |        |   |               |   |                       |    |       |
| 1                                                                                | Woman herself                                                                |                                                                                                                                                                                                                                                                                                                                             |                                                                                                                                                                                                                                                                                                                                                                |   |                 |    |               |   |          |   |         |   |        |   |               |   |                       |    |       |
| 98                                                                               | Other                                                                        |                                                                                                                                                                                                                                                                                                                                             |                                                                                                                                                                                                                                                                                                                                                                |   |                 |    |               |   |          |   |         |   |        |   |               |   |                       |    |       |
| 226                                                                              | [otherrespondent_swf]<br>Show the field ONLY if:<br>[respondent_swf] = '98'  | Specify other                                                                                                                                                                                                                                                                                                                               | dropdown<br><table border="1"> <tr><td>1</td><td>Husband</td></tr> <tr><td>2</td><td>Mother in law</td></tr> <tr><td>3</td><td>Mother</td></tr> <tr><td>4</td><td>Sibling</td></tr> <tr><td>5</td><td>Father</td></tr> <tr><td>6</td><td>Father in law</td></tr> <tr><td>7</td><td>other relative/Friend</td></tr> <tr><td>98</td><td>Other</td></tr> </table> | 1 | Husband         | 2  | Mother in law | 3 | Mother   | 4 | Sibling | 5 | Father | 6 | Father in law | 7 | other relative/Friend | 98 | Other |
| 1                                                                                | Husband                                                                      |                                                                                                                                                                                                                                                                                                                                             |                                                                                                                                                                                                                                                                                                                                                                |   |                 |    |               |   |          |   |         |   |        |   |               |   |                       |    |       |
| 2                                                                                | Mother in law                                                                |                                                                                                                                                                                                                                                                                                                                             |                                                                                                                                                                                                                                                                                                                                                                |   |                 |    |               |   |          |   |         |   |        |   |               |   |                       |    |       |
| 3                                                                                | Mother                                                                       |                                                                                                                                                                                                                                                                                                                                             |                                                                                                                                                                                                                                                                                                                                                                |   |                 |    |               |   |          |   |         |   |        |   |               |   |                       |    |       |
| 4                                                                                | Sibling                                                                      |                                                                                                                                                                                                                                                                                                                                             |                                                                                                                                                                                                                                                                                                                                                                |   |                 |    |               |   |          |   |         |   |        |   |               |   |                       |    |       |
| 5                                                                                | Father                                                                       |                                                                                                                                                                                                                                                                                                                                             |                                                                                                                                                                                                                                                                                                                                                                |   |                 |    |               |   |          |   |         |   |        |   |               |   |                       |    |       |
| 6                                                                                | Father in law                                                                |                                                                                                                                                                                                                                                                                                                                             |                                                                                                                                                                                                                                                                                                                                                                |   |                 |    |               |   |          |   |         |   |        |   |               |   |                       |    |       |
| 7                                                                                | other relative/Friend                                                        |                                                                                                                                                                                                                                                                                                                                             |                                                                                                                                                                                                                                                                                                                                                                |   |                 |    |               |   |          |   |         |   |        |   |               |   |                       |    |       |
| 98                                                                               | Other                                                                        |                                                                                                                                                                                                                                                                                                                                             |                                                                                                                                                                                                                                                                                                                                                                |   |                 |    |               |   |          |   |         |   |        |   |               |   |                       |    |       |
| 227                                                                              | [home_swf]<br>Show the field ONLY if:<br>[dischstat_mat] != '3'              | Is mother based at the same home that you were in prior to delivery (6 weeks after birth)?                                                                                                                                                                                                                                                  | yesno<br><table border="1"> <tr><td>1</td><td>Yes</td></tr> <tr><td>0</td><td>No</td></tr> </table>                                                                                                                                                                                                                                                            | 1 | Yes             | 0  | No            |   |          |   |         |   |        |   |               |   |                       |    |       |
| 1                                                                                | Yes                                                                          |                                                                                                                                                                                                                                                                                                                                             |                                                                                                                                                                                                                                                                                                                                                                |   |                 |    |               |   |          |   |         |   |        |   |               |   |                       |    |       |
| 0                                                                                | No                                                                           |                                                                                                                                                                                                                                                                                                                                             |                                                                                                                                                                                                                                                                                                                                                                |   |                 |    |               |   |          |   |         |   |        |   |               |   |                       |    |       |
| 228                                                                              | [momalive_swf]<br>Show the field ONLY if:<br>[dischstat_mat] != '3'          | Section Header: <i>Maternal Vital Status</i><br>Is the woman alive at the time of follow-up interview?                                                                                                                                                                                                                                      | yesno<br><table border="1"> <tr><td>1</td><td>Yes</td></tr> <tr><td>0</td><td>No</td></tr> </table>                                                                                                                                                                                                                                                            | 1 | Yes             | 0  | No            |   |          |   |         |   |        |   |               |   |                       |    |       |
| 1                                                                                | Yes                                                                          |                                                                                                                                                                                                                                                                                                                                             |                                                                                                                                                                                                                                                                                                                                                                |   |                 |    |               |   |          |   |         |   |        |   |               |   |                       |    |       |
| 0                                                                                | No                                                                           |                                                                                                                                                                                                                                                                                                                                             |                                                                                                                                                                                                                                                                                                                                                                |   |                 |    |               |   |          |   |         |   |        |   |               |   |                       |    |       |

|     |                                                                                          |                                                                                                                                                                   |                                                                                                                                                                                                                                                                                                                                                                                                                          |   |                        |                                      |          |                        |                        |    |                        |                                                           |    |                         |       |
|-----|------------------------------------------------------------------------------------------|-------------------------------------------------------------------------------------------------------------------------------------------------------------------|--------------------------------------------------------------------------------------------------------------------------------------------------------------------------------------------------------------------------------------------------------------------------------------------------------------------------------------------------------------------------------------------------------------------------|---|------------------------|--------------------------------------|----------|------------------------|------------------------|----|------------------------|-----------------------------------------------------------|----|-------------------------|-------|
| 229 | [momdeathdate_swf]<br>Show the field ONLY if:<br>[momalive_swf] = '0'                    | On what date did she die?                                                                                                                                         | text (date_dmy)                                                                                                                                                                                                                                                                                                                                                                                                          |   |                        |                                      |          |                        |                        |    |                        |                                                           |    |                         |       |
| 230 | [momdeathplace_swf]<br>Show the field ONLY if:<br>[momalive_swf] = '0'                   | Where did she die?                                                                                                                                                | dropdown<br><table border="1"> <tr><td>1</td><td>Home</td></tr> <tr><td>2</td><td>Hospital</td></tr> <tr><td>3</td><td>On the way to hospital</td></tr> <tr><td>98</td><td>Other</td></tr> </table>                                                                                                                                                                                                                      | 1 | Home                   | 2                                    | Hospital | 3                      | On the way to hospital | 98 | Other                  |                                                           |    |                         |       |
| 1   | Home                                                                                     |                                                                                                                                                                   |                                                                                                                                                                                                                                                                                                                                                                                                                          |   |                        |                                      |          |                        |                        |    |                        |                                                           |    |                         |       |
| 2   | Hospital                                                                                 |                                                                                                                                                                   |                                                                                                                                                                                                                                                                                                                                                                                                                          |   |                        |                                      |          |                        |                        |    |                        |                                                           |    |                         |       |
| 3   | On the way to hospital                                                                   |                                                                                                                                                                   |                                                                                                                                                                                                                                                                                                                                                                                                                          |   |                        |                                      |          |                        |                        |    |                        |                                                           |    |                         |       |
| 98  | Other                                                                                    |                                                                                                                                                                   |                                                                                                                                                                                                                                                                                                                                                                                                                          |   |                        |                                      |          |                        |                        |    |                        |                                                           |    |                         |       |
| 231 | [momadmit_swf]<br>Show the field ONLY if:<br>[momalive_swf] = '1'                        | Section Header: <i>Health seeking/readmissions</i><br>Was the mother admitted for one or more nights at a facility for any reason after being home post-delivery? | yesno<br><table border="1"> <tr><td>1</td><td>Yes</td></tr> <tr><td>0</td><td>No</td></tr> </table>                                                                                                                                                                                                                                                                                                                      | 1 | Yes                    | 0                                    | No       |                        |                        |    |                        |                                                           |    |                         |       |
| 1   | Yes                                                                                      |                                                                                                                                                                   |                                                                                                                                                                                                                                                                                                                                                                                                                          |   |                        |                                      |          |                        |                        |    |                        |                                                           |    |                         |       |
| 0   | No                                                                                       |                                                                                                                                                                   |                                                                                                                                                                                                                                                                                                                                                                                                                          |   |                        |                                      |          |                        |                        |    |                        |                                                           |    |                         |       |
| 232 | [nummomadmit_swf]<br>Show the field ONLY if:<br>[momadmit_swf] = '1'                     | How many times was the mother admitted in the first 6 weeks after delivery?                                                                                       | dropdown<br><table border="1"> <tr><td>1</td><td>1</td></tr> <tr><td>2</td><td>2</td></tr> <tr><td>3</td><td>3</td></tr> <tr><td>4</td><td>&gt;3</td></tr> </table>                                                                                                                                                                                                                                                      | 1 | 1                      | 2                                    | 2        | 3                      | 3                      | 4  | >3                     |                                                           |    |                         |       |
| 1   | 1                                                                                        |                                                                                                                                                                   |                                                                                                                                                                                                                                                                                                                                                                                                                          |   |                        |                                      |          |                        |                        |    |                        |                                                           |    |                         |       |
| 2   | 2                                                                                        |                                                                                                                                                                   |                                                                                                                                                                                                                                                                                                                                                                                                                          |   |                        |                                      |          |                        |                        |    |                        |                                                           |    |                         |       |
| 3   | 3                                                                                        |                                                                                                                                                                   |                                                                                                                                                                                                                                                                                                                                                                                                                          |   |                        |                                      |          |                        |                        |    |                        |                                                           |    |                         |       |
| 4   | >3                                                                                       |                                                                                                                                                                   |                                                                                                                                                                                                                                                                                                                                                                                                                          |   |                        |                                      |          |                        |                        |    |                        |                                                           |    |                         |       |
| 233 | [momadmitdate_swf]<br>Show the field ONLY if:<br>[momadmit_swf] = '1'                    | Date of first admission                                                                                                                                           | text (date_dmy)                                                                                                                                                                                                                                                                                                                                                                                                          |   |                        |                                      |          |                        |                        |    |                        |                                                           |    |                         |       |
| 234 | [momnightsadm_swf]<br>Show the field ONLY if:<br>[momadmit_swf] = '1'                    | For how many nights was she admitted?                                                                                                                             | text (integer, Min: 1)                                                                                                                                                                                                                                                                                                                                                                                                   |   |                        |                                      |          |                        |                        |    |                        |                                                           |    |                         |       |
| 235 | [momadmitpathway_swf]<br>Show the field ONLY if:<br>[momadmit_swf] = '1'                 | What was the care-seeking pathway to the first admission?                                                                                                         | checkbox<br><table border="1"> <tr> <td>1</td> <td>momadmitpathway_swf__1</td> <td>Routine PNC visit identified problem</td> </tr> <tr> <td>2</td> <td>momadmitpathway_swf__2</td> <td>Self referral</td> </tr> <tr> <td>3</td> <td>momadmitpathway_swf__3</td> <td>Both self-referral and PNC visit resulted in care seeking</td> </tr> <tr> <td>98</td> <td>momadmitpathway_swf__98</td> <td>Other</td> </tr> </table> | 1 | momadmitpathway_swf__1 | Routine PNC visit identified problem | 2        | momadmitpathway_swf__2 | Self referral          | 3  | momadmitpathway_swf__3 | Both self-referral and PNC visit resulted in care seeking | 98 | momadmitpathway_swf__98 | Other |
| 1   | momadmitpathway_swf__1                                                                   | Routine PNC visit identified problem                                                                                                                              |                                                                                                                                                                                                                                                                                                                                                                                                                          |   |                        |                                      |          |                        |                        |    |                        |                                                           |    |                         |       |
| 2   | momadmitpathway_swf__2                                                                   | Self referral                                                                                                                                                     |                                                                                                                                                                                                                                                                                                                                                                                                                          |   |                        |                                      |          |                        |                        |    |                        |                                                           |    |                         |       |
| 3   | momadmitpathway_swf__3                                                                   | Both self-referral and PNC visit resulted in care seeking                                                                                                         |                                                                                                                                                                                                                                                                                                                                                                                                                          |   |                        |                                      |          |                        |                        |    |                        |                                                           |    |                         |       |
| 98  | momadmitpathway_swf__98                                                                  | Other                                                                                                                                                             |                                                                                                                                                                                                                                                                                                                                                                                                                          |   |                        |                                      |          |                        |                        |    |                        |                                                           |    |                         |       |
| 236 | [momadmitpathwayother_swf]<br>Show the field ONLY if:<br>[momadmitpathway_swf(98)] = '1' | Other pathway:                                                                                                                                                    | text                                                                                                                                                                                                                                                                                                                                                                                                                     |   |                        |                                      |          |                        |                        |    |                        |                                                           |    |                         |       |

|     |                                                                                                |                                                                                           |                                                                                                                                                                                                                                                                                                                                                                                                                                                                                                                                                                                                                                                                                                                                                                                                                                                                                                                                                                                                                                                                                                                                                                                                                                                                                                                                                                                                                                                                                                                                                                                                                                                                                                                                                                                                                                                                                                                                                                   |   |                     |                        |   |                     |                                |   |                     |                                                        |   |                     |                    |   |                     |             |   |                     |                     |   |                     |                   |   |                     |                          |   |                     |                         |    |                      |                |    |                      |                                   |    |                      |                                 |    |                      |                             |    |                      |                            |    |                      |                    |    |                      |                   |    |                      |                     |    |                      |                 |    |                      |                |    |                      |             |    |                      |                       |    |                      |                 |    |                      |      |
|-----|------------------------------------------------------------------------------------------------|-------------------------------------------------------------------------------------------|-------------------------------------------------------------------------------------------------------------------------------------------------------------------------------------------------------------------------------------------------------------------------------------------------------------------------------------------------------------------------------------------------------------------------------------------------------------------------------------------------------------------------------------------------------------------------------------------------------------------------------------------------------------------------------------------------------------------------------------------------------------------------------------------------------------------------------------------------------------------------------------------------------------------------------------------------------------------------------------------------------------------------------------------------------------------------------------------------------------------------------------------------------------------------------------------------------------------------------------------------------------------------------------------------------------------------------------------------------------------------------------------------------------------------------------------------------------------------------------------------------------------------------------------------------------------------------------------------------------------------------------------------------------------------------------------------------------------------------------------------------------------------------------------------------------------------------------------------------------------------------------------------------------------------------------------------------------------|---|---------------------|------------------------|---|---------------------|--------------------------------|---|---------------------|--------------------------------------------------------|---|---------------------|--------------------|---|---------------------|-------------|---|---------------------|---------------------|---|---------------------|-------------------|---|---------------------|--------------------------|---|---------------------|-------------------------|----|----------------------|----------------|----|----------------------|-----------------------------------|----|----------------------|---------------------------------|----|----------------------|-----------------------------|----|----------------------|----------------------------|----|----------------------|--------------------|----|----------------------|-------------------|----|----------------------|---------------------|----|----------------------|-----------------|----|----------------------|----------------|----|----------------------|-------------|----|----------------------|-----------------------|----|----------------------|-----------------|----|----------------------|------|
| 237 | <p>[momadmitsymp_swf]</p> <p>Show the field ONLY if:<br/>[momadmit_swf] = '1'</p>              | <p>What were the symptoms she experienced during this illness? (check all that apply)</p> | <p>checkbox</p> <table border="1"> <tr><td>1</td><td>momadmitsymp_swf__1</td><td>Heavy vaginal bleeding</td></tr> <tr><td>2</td><td>momadmitsymp_swf__2</td><td>Bleeding from nose/ eyes/ ears</td></tr> <tr><td>3</td><td>momadmitsymp_swf__3</td><td>Petechiae (small red dots and bruises across the skin)</td></tr> <tr><td>4</td><td>momadmitsymp_swf__4</td><td>Abnormal tiredness</td></tr> <tr><td>5</td><td>momadmitsymp_swf__5</td><td>Convulsions</td></tr> <tr><td>6</td><td>momadmitsymp_swf__6</td><td>Shortness of breath</td></tr> <tr><td>7</td><td>momadmitsymp_swf__7</td><td>Changes in vision</td></tr> <tr><td>8</td><td>momadmitsymp_swf__8</td><td>Severe headache &lt; 24 hrs</td></tr> <tr><td>9</td><td>momadmitsymp_swf__9</td><td>Severe headache &gt;24 hrs</td></tr> <tr><td>10</td><td>momadmitsymp_swf__10</td><td>Abdominal pain</td></tr> <tr><td>11</td><td>momadmitsymp_swf__11</td><td>Abdominal tenderness when touched</td></tr> <tr><td>12</td><td>momadmitsymp_swf__12</td><td>Foul smelling vaginal discharge</td></tr> <tr><td>13</td><td>momadmitsymp_swf__13</td><td>Fever/ body hotness &lt; 7days</td></tr> <tr><td>14</td><td>momadmitsymp_swf__14</td><td>Fever/ body hotness &gt;7days</td></tr> <tr><td>15</td><td>momadmitsymp_swf__15</td><td>Diarrhea &lt; 14 days</td></tr> <tr><td>16</td><td>momadmitsymp_swf__16</td><td>Diarrhea &gt;14 days</td></tr> <tr><td>17</td><td>momadmitsymp_swf__17</td><td>Vomiting everything</td></tr> <tr><td>18</td><td>momadmitsymp_swf__18</td><td>Cough &lt; 14 days</td></tr> <tr><td>19</td><td>momadmitsymp_swf__19</td><td>Cough &gt;14 days</td></tr> <tr><td>20</td><td>momadmitsymp_swf__20</td><td>Yellow eyes</td></tr> <tr><td>21</td><td>momadmitsymp_swf__21</td><td>Loss of consciousness</td></tr> <tr><td>98</td><td>momadmitsymp_swf__98</td><td>Other (specify)</td></tr> <tr><td>99</td><td>momadmitsymp_swf__99</td><td>None</td></tr> </table> | 1 | momadmitsymp_swf__1 | Heavy vaginal bleeding | 2 | momadmitsymp_swf__2 | Bleeding from nose/ eyes/ ears | 3 | momadmitsymp_swf__3 | Petechiae (small red dots and bruises across the skin) | 4 | momadmitsymp_swf__4 | Abnormal tiredness | 5 | momadmitsymp_swf__5 | Convulsions | 6 | momadmitsymp_swf__6 | Shortness of breath | 7 | momadmitsymp_swf__7 | Changes in vision | 8 | momadmitsymp_swf__8 | Severe headache < 24 hrs | 9 | momadmitsymp_swf__9 | Severe headache >24 hrs | 10 | momadmitsymp_swf__10 | Abdominal pain | 11 | momadmitsymp_swf__11 | Abdominal tenderness when touched | 12 | momadmitsymp_swf__12 | Foul smelling vaginal discharge | 13 | momadmitsymp_swf__13 | Fever/ body hotness < 7days | 14 | momadmitsymp_swf__14 | Fever/ body hotness >7days | 15 | momadmitsymp_swf__15 | Diarrhea < 14 days | 16 | momadmitsymp_swf__16 | Diarrhea >14 days | 17 | momadmitsymp_swf__17 | Vomiting everything | 18 | momadmitsymp_swf__18 | Cough < 14 days | 19 | momadmitsymp_swf__19 | Cough >14 days | 20 | momadmitsymp_swf__20 | Yellow eyes | 21 | momadmitsymp_swf__21 | Loss of consciousness | 98 | momadmitsymp_swf__98 | Other (specify) | 99 | momadmitsymp_swf__99 | None |
| 1   | momadmitsymp_swf__1                                                                            | Heavy vaginal bleeding                                                                    |                                                                                                                                                                                                                                                                                                                                                                                                                                                                                                                                                                                                                                                                                                                                                                                                                                                                                                                                                                                                                                                                                                                                                                                                                                                                                                                                                                                                                                                                                                                                                                                                                                                                                                                                                                                                                                                                                                                                                                   |   |                     |                        |   |                     |                                |   |                     |                                                        |   |                     |                    |   |                     |             |   |                     |                     |   |                     |                   |   |                     |                          |   |                     |                         |    |                      |                |    |                      |                                   |    |                      |                                 |    |                      |                             |    |                      |                            |    |                      |                    |    |                      |                   |    |                      |                     |    |                      |                 |    |                      |                |    |                      |             |    |                      |                       |    |                      |                 |    |                      |      |
| 2   | momadmitsymp_swf__2                                                                            | Bleeding from nose/ eyes/ ears                                                            |                                                                                                                                                                                                                                                                                                                                                                                                                                                                                                                                                                                                                                                                                                                                                                                                                                                                                                                                                                                                                                                                                                                                                                                                                                                                                                                                                                                                                                                                                                                                                                                                                                                                                                                                                                                                                                                                                                                                                                   |   |                     |                        |   |                     |                                |   |                     |                                                        |   |                     |                    |   |                     |             |   |                     |                     |   |                     |                   |   |                     |                          |   |                     |                         |    |                      |                |    |                      |                                   |    |                      |                                 |    |                      |                             |    |                      |                            |    |                      |                    |    |                      |                   |    |                      |                     |    |                      |                 |    |                      |                |    |                      |             |    |                      |                       |    |                      |                 |    |                      |      |
| 3   | momadmitsymp_swf__3                                                                            | Petechiae (small red dots and bruises across the skin)                                    |                                                                                                                                                                                                                                                                                                                                                                                                                                                                                                                                                                                                                                                                                                                                                                                                                                                                                                                                                                                                                                                                                                                                                                                                                                                                                                                                                                                                                                                                                                                                                                                                                                                                                                                                                                                                                                                                                                                                                                   |   |                     |                        |   |                     |                                |   |                     |                                                        |   |                     |                    |   |                     |             |   |                     |                     |   |                     |                   |   |                     |                          |   |                     |                         |    |                      |                |    |                      |                                   |    |                      |                                 |    |                      |                             |    |                      |                            |    |                      |                    |    |                      |                   |    |                      |                     |    |                      |                 |    |                      |                |    |                      |             |    |                      |                       |    |                      |                 |    |                      |      |
| 4   | momadmitsymp_swf__4                                                                            | Abnormal tiredness                                                                        |                                                                                                                                                                                                                                                                                                                                                                                                                                                                                                                                                                                                                                                                                                                                                                                                                                                                                                                                                                                                                                                                                                                                                                                                                                                                                                                                                                                                                                                                                                                                                                                                                                                                                                                                                                                                                                                                                                                                                                   |   |                     |                        |   |                     |                                |   |                     |                                                        |   |                     |                    |   |                     |             |   |                     |                     |   |                     |                   |   |                     |                          |   |                     |                         |    |                      |                |    |                      |                                   |    |                      |                                 |    |                      |                             |    |                      |                            |    |                      |                    |    |                      |                   |    |                      |                     |    |                      |                 |    |                      |                |    |                      |             |    |                      |                       |    |                      |                 |    |                      |      |
| 5   | momadmitsymp_swf__5                                                                            | Convulsions                                                                               |                                                                                                                                                                                                                                                                                                                                                                                                                                                                                                                                                                                                                                                                                                                                                                                                                                                                                                                                                                                                                                                                                                                                                                                                                                                                                                                                                                                                                                                                                                                                                                                                                                                                                                                                                                                                                                                                                                                                                                   |   |                     |                        |   |                     |                                |   |                     |                                                        |   |                     |                    |   |                     |             |   |                     |                     |   |                     |                   |   |                     |                          |   |                     |                         |    |                      |                |    |                      |                                   |    |                      |                                 |    |                      |                             |    |                      |                            |    |                      |                    |    |                      |                   |    |                      |                     |    |                      |                 |    |                      |                |    |                      |             |    |                      |                       |    |                      |                 |    |                      |      |
| 6   | momadmitsymp_swf__6                                                                            | Shortness of breath                                                                       |                                                                                                                                                                                                                                                                                                                                                                                                                                                                                                                                                                                                                                                                                                                                                                                                                                                                                                                                                                                                                                                                                                                                                                                                                                                                                                                                                                                                                                                                                                                                                                                                                                                                                                                                                                                                                                                                                                                                                                   |   |                     |                        |   |                     |                                |   |                     |                                                        |   |                     |                    |   |                     |             |   |                     |                     |   |                     |                   |   |                     |                          |   |                     |                         |    |                      |                |    |                      |                                   |    |                      |                                 |    |                      |                             |    |                      |                            |    |                      |                    |    |                      |                   |    |                      |                     |    |                      |                 |    |                      |                |    |                      |             |    |                      |                       |    |                      |                 |    |                      |      |
| 7   | momadmitsymp_swf__7                                                                            | Changes in vision                                                                         |                                                                                                                                                                                                                                                                                                                                                                                                                                                                                                                                                                                                                                                                                                                                                                                                                                                                                                                                                                                                                                                                                                                                                                                                                                                                                                                                                                                                                                                                                                                                                                                                                                                                                                                                                                                                                                                                                                                                                                   |   |                     |                        |   |                     |                                |   |                     |                                                        |   |                     |                    |   |                     |             |   |                     |                     |   |                     |                   |   |                     |                          |   |                     |                         |    |                      |                |    |                      |                                   |    |                      |                                 |    |                      |                             |    |                      |                            |    |                      |                    |    |                      |                   |    |                      |                     |    |                      |                 |    |                      |                |    |                      |             |    |                      |                       |    |                      |                 |    |                      |      |
| 8   | momadmitsymp_swf__8                                                                            | Severe headache < 24 hrs                                                                  |                                                                                                                                                                                                                                                                                                                                                                                                                                                                                                                                                                                                                                                                                                                                                                                                                                                                                                                                                                                                                                                                                                                                                                                                                                                                                                                                                                                                                                                                                                                                                                                                                                                                                                                                                                                                                                                                                                                                                                   |   |                     |                        |   |                     |                                |   |                     |                                                        |   |                     |                    |   |                     |             |   |                     |                     |   |                     |                   |   |                     |                          |   |                     |                         |    |                      |                |    |                      |                                   |    |                      |                                 |    |                      |                             |    |                      |                            |    |                      |                    |    |                      |                   |    |                      |                     |    |                      |                 |    |                      |                |    |                      |             |    |                      |                       |    |                      |                 |    |                      |      |
| 9   | momadmitsymp_swf__9                                                                            | Severe headache >24 hrs                                                                   |                                                                                                                                                                                                                                                                                                                                                                                                                                                                                                                                                                                                                                                                                                                                                                                                                                                                                                                                                                                                                                                                                                                                                                                                                                                                                                                                                                                                                                                                                                                                                                                                                                                                                                                                                                                                                                                                                                                                                                   |   |                     |                        |   |                     |                                |   |                     |                                                        |   |                     |                    |   |                     |             |   |                     |                     |   |                     |                   |   |                     |                          |   |                     |                         |    |                      |                |    |                      |                                   |    |                      |                                 |    |                      |                             |    |                      |                            |    |                      |                    |    |                      |                   |    |                      |                     |    |                      |                 |    |                      |                |    |                      |             |    |                      |                       |    |                      |                 |    |                      |      |
| 10  | momadmitsymp_swf__10                                                                           | Abdominal pain                                                                            |                                                                                                                                                                                                                                                                                                                                                                                                                                                                                                                                                                                                                                                                                                                                                                                                                                                                                                                                                                                                                                                                                                                                                                                                                                                                                                                                                                                                                                                                                                                                                                                                                                                                                                                                                                                                                                                                                                                                                                   |   |                     |                        |   |                     |                                |   |                     |                                                        |   |                     |                    |   |                     |             |   |                     |                     |   |                     |                   |   |                     |                          |   |                     |                         |    |                      |                |    |                      |                                   |    |                      |                                 |    |                      |                             |    |                      |                            |    |                      |                    |    |                      |                   |    |                      |                     |    |                      |                 |    |                      |                |    |                      |             |    |                      |                       |    |                      |                 |    |                      |      |
| 11  | momadmitsymp_swf__11                                                                           | Abdominal tenderness when touched                                                         |                                                                                                                                                                                                                                                                                                                                                                                                                                                                                                                                                                                                                                                                                                                                                                                                                                                                                                                                                                                                                                                                                                                                                                                                                                                                                                                                                                                                                                                                                                                                                                                                                                                                                                                                                                                                                                                                                                                                                                   |   |                     |                        |   |                     |                                |   |                     |                                                        |   |                     |                    |   |                     |             |   |                     |                     |   |                     |                   |   |                     |                          |   |                     |                         |    |                      |                |    |                      |                                   |    |                      |                                 |    |                      |                             |    |                      |                            |    |                      |                    |    |                      |                   |    |                      |                     |    |                      |                 |    |                      |                |    |                      |             |    |                      |                       |    |                      |                 |    |                      |      |
| 12  | momadmitsymp_swf__12                                                                           | Foul smelling vaginal discharge                                                           |                                                                                                                                                                                                                                                                                                                                                                                                                                                                                                                                                                                                                                                                                                                                                                                                                                                                                                                                                                                                                                                                                                                                                                                                                                                                                                                                                                                                                                                                                                                                                                                                                                                                                                                                                                                                                                                                                                                                                                   |   |                     |                        |   |                     |                                |   |                     |                                                        |   |                     |                    |   |                     |             |   |                     |                     |   |                     |                   |   |                     |                          |   |                     |                         |    |                      |                |    |                      |                                   |    |                      |                                 |    |                      |                             |    |                      |                            |    |                      |                    |    |                      |                   |    |                      |                     |    |                      |                 |    |                      |                |    |                      |             |    |                      |                       |    |                      |                 |    |                      |      |
| 13  | momadmitsymp_swf__13                                                                           | Fever/ body hotness < 7days                                                               |                                                                                                                                                                                                                                                                                                                                                                                                                                                                                                                                                                                                                                                                                                                                                                                                                                                                                                                                                                                                                                                                                                                                                                                                                                                                                                                                                                                                                                                                                                                                                                                                                                                                                                                                                                                                                                                                                                                                                                   |   |                     |                        |   |                     |                                |   |                     |                                                        |   |                     |                    |   |                     |             |   |                     |                     |   |                     |                   |   |                     |                          |   |                     |                         |    |                      |                |    |                      |                                   |    |                      |                                 |    |                      |                             |    |                      |                            |    |                      |                    |    |                      |                   |    |                      |                     |    |                      |                 |    |                      |                |    |                      |             |    |                      |                       |    |                      |                 |    |                      |      |
| 14  | momadmitsymp_swf__14                                                                           | Fever/ body hotness >7days                                                                |                                                                                                                                                                                                                                                                                                                                                                                                                                                                                                                                                                                                                                                                                                                                                                                                                                                                                                                                                                                                                                                                                                                                                                                                                                                                                                                                                                                                                                                                                                                                                                                                                                                                                                                                                                                                                                                                                                                                                                   |   |                     |                        |   |                     |                                |   |                     |                                                        |   |                     |                    |   |                     |             |   |                     |                     |   |                     |                   |   |                     |                          |   |                     |                         |    |                      |                |    |                      |                                   |    |                      |                                 |    |                      |                             |    |                      |                            |    |                      |                    |    |                      |                   |    |                      |                     |    |                      |                 |    |                      |                |    |                      |             |    |                      |                       |    |                      |                 |    |                      |      |
| 15  | momadmitsymp_swf__15                                                                           | Diarrhea < 14 days                                                                        |                                                                                                                                                                                                                                                                                                                                                                                                                                                                                                                                                                                                                                                                                                                                                                                                                                                                                                                                                                                                                                                                                                                                                                                                                                                                                                                                                                                                                                                                                                                                                                                                                                                                                                                                                                                                                                                                                                                                                                   |   |                     |                        |   |                     |                                |   |                     |                                                        |   |                     |                    |   |                     |             |   |                     |                     |   |                     |                   |   |                     |                          |   |                     |                         |    |                      |                |    |                      |                                   |    |                      |                                 |    |                      |                             |    |                      |                            |    |                      |                    |    |                      |                   |    |                      |                     |    |                      |                 |    |                      |                |    |                      |             |    |                      |                       |    |                      |                 |    |                      |      |
| 16  | momadmitsymp_swf__16                                                                           | Diarrhea >14 days                                                                         |                                                                                                                                                                                                                                                                                                                                                                                                                                                                                                                                                                                                                                                                                                                                                                                                                                                                                                                                                                                                                                                                                                                                                                                                                                                                                                                                                                                                                                                                                                                                                                                                                                                                                                                                                                                                                                                                                                                                                                   |   |                     |                        |   |                     |                                |   |                     |                                                        |   |                     |                    |   |                     |             |   |                     |                     |   |                     |                   |   |                     |                          |   |                     |                         |    |                      |                |    |                      |                                   |    |                      |                                 |    |                      |                             |    |                      |                            |    |                      |                    |    |                      |                   |    |                      |                     |    |                      |                 |    |                      |                |    |                      |             |    |                      |                       |    |                      |                 |    |                      |      |
| 17  | momadmitsymp_swf__17                                                                           | Vomiting everything                                                                       |                                                                                                                                                                                                                                                                                                                                                                                                                                                                                                                                                                                                                                                                                                                                                                                                                                                                                                                                                                                                                                                                                                                                                                                                                                                                                                                                                                                                                                                                                                                                                                                                                                                                                                                                                                                                                                                                                                                                                                   |   |                     |                        |   |                     |                                |   |                     |                                                        |   |                     |                    |   |                     |             |   |                     |                     |   |                     |                   |   |                     |                          |   |                     |                         |    |                      |                |    |                      |                                   |    |                      |                                 |    |                      |                             |    |                      |                            |    |                      |                    |    |                      |                   |    |                      |                     |    |                      |                 |    |                      |                |    |                      |             |    |                      |                       |    |                      |                 |    |                      |      |
| 18  | momadmitsymp_swf__18                                                                           | Cough < 14 days                                                                           |                                                                                                                                                                                                                                                                                                                                                                                                                                                                                                                                                                                                                                                                                                                                                                                                                                                                                                                                                                                                                                                                                                                                                                                                                                                                                                                                                                                                                                                                                                                                                                                                                                                                                                                                                                                                                                                                                                                                                                   |   |                     |                        |   |                     |                                |   |                     |                                                        |   |                     |                    |   |                     |             |   |                     |                     |   |                     |                   |   |                     |                          |   |                     |                         |    |                      |                |    |                      |                                   |    |                      |                                 |    |                      |                             |    |                      |                            |    |                      |                    |    |                      |                   |    |                      |                     |    |                      |                 |    |                      |                |    |                      |             |    |                      |                       |    |                      |                 |    |                      |      |
| 19  | momadmitsymp_swf__19                                                                           | Cough >14 days                                                                            |                                                                                                                                                                                                                                                                                                                                                                                                                                                                                                                                                                                                                                                                                                                                                                                                                                                                                                                                                                                                                                                                                                                                                                                                                                                                                                                                                                                                                                                                                                                                                                                                                                                                                                                                                                                                                                                                                                                                                                   |   |                     |                        |   |                     |                                |   |                     |                                                        |   |                     |                    |   |                     |             |   |                     |                     |   |                     |                   |   |                     |                          |   |                     |                         |    |                      |                |    |                      |                                   |    |                      |                                 |    |                      |                             |    |                      |                            |    |                      |                    |    |                      |                   |    |                      |                     |    |                      |                 |    |                      |                |    |                      |             |    |                      |                       |    |                      |                 |    |                      |      |
| 20  | momadmitsymp_swf__20                                                                           | Yellow eyes                                                                               |                                                                                                                                                                                                                                                                                                                                                                                                                                                                                                                                                                                                                                                                                                                                                                                                                                                                                                                                                                                                                                                                                                                                                                                                                                                                                                                                                                                                                                                                                                                                                                                                                                                                                                                                                                                                                                                                                                                                                                   |   |                     |                        |   |                     |                                |   |                     |                                                        |   |                     |                    |   |                     |             |   |                     |                     |   |                     |                   |   |                     |                          |   |                     |                         |    |                      |                |    |                      |                                   |    |                      |                                 |    |                      |                             |    |                      |                            |    |                      |                    |    |                      |                   |    |                      |                     |    |                      |                 |    |                      |                |    |                      |             |    |                      |                       |    |                      |                 |    |                      |      |
| 21  | momadmitsymp_swf__21                                                                           | Loss of consciousness                                                                     |                                                                                                                                                                                                                                                                                                                                                                                                                                                                                                                                                                                                                                                                                                                                                                                                                                                                                                                                                                                                                                                                                                                                                                                                                                                                                                                                                                                                                                                                                                                                                                                                                                                                                                                                                                                                                                                                                                                                                                   |   |                     |                        |   |                     |                                |   |                     |                                                        |   |                     |                    |   |                     |             |   |                     |                     |   |                     |                   |   |                     |                          |   |                     |                         |    |                      |                |    |                      |                                   |    |                      |                                 |    |                      |                             |    |                      |                            |    |                      |                    |    |                      |                   |    |                      |                     |    |                      |                 |    |                      |                |    |                      |             |    |                      |                       |    |                      |                 |    |                      |      |
| 98  | momadmitsymp_swf__98                                                                           | Other (specify)                                                                           |                                                                                                                                                                                                                                                                                                                                                                                                                                                                                                                                                                                                                                                                                                                                                                                                                                                                                                                                                                                                                                                                                                                                                                                                                                                                                                                                                                                                                                                                                                                                                                                                                                                                                                                                                                                                                                                                                                                                                                   |   |                     |                        |   |                     |                                |   |                     |                                                        |   |                     |                    |   |                     |             |   |                     |                     |   |                     |                   |   |                     |                          |   |                     |                         |    |                      |                |    |                      |                                   |    |                      |                                 |    |                      |                             |    |                      |                            |    |                      |                    |    |                      |                   |    |                      |                     |    |                      |                 |    |                      |                |    |                      |             |    |                      |                       |    |                      |                 |    |                      |      |
| 99  | momadmitsymp_swf__99                                                                           | None                                                                                      |                                                                                                                                                                                                                                                                                                                                                                                                                                                                                                                                                                                                                                                                                                                                                                                                                                                                                                                                                                                                                                                                                                                                                                                                                                                                                                                                                                                                                                                                                                                                                                                                                                                                                                                                                                                                                                                                                                                                                                   |   |                     |                        |   |                     |                                |   |                     |                                                        |   |                     |                    |   |                     |             |   |                     |                     |   |                     |                   |   |                     |                          |   |                     |                         |    |                      |                |    |                      |                                   |    |                      |                                 |    |                      |                             |    |                      |                            |    |                      |                    |    |                      |                   |    |                      |                     |    |                      |                 |    |                      |                |    |                      |             |    |                      |                       |    |                      |                 |    |                      |      |
| 238 | <p>[momadmitsympother_swf]</p> <p>Show the field ONLY if:<br/>[momadmitsymp_swf(98)] = '1'</p> | Other symptom                                                                             | text                                                                                                                                                                                                                                                                                                                                                                                                                                                                                                                                                                                                                                                                                                                                                                                                                                                                                                                                                                                                                                                                                                                                                                                                                                                                                                                                                                                                                                                                                                                                                                                                                                                                                                                                                                                                                                                                                                                                                              |   |                     |                        |   |                     |                                |   |                     |                                                        |   |                     |                    |   |                     |             |   |                     |                     |   |                     |                   |   |                     |                          |   |                     |                         |    |                      |                |    |                      |                                   |    |                      |                                 |    |                      |                             |    |                      |                            |    |                      |                    |    |                      |                   |    |                      |                     |    |                      |                 |    |                      |                |    |                      |             |    |                      |                       |    |                      |                 |    |                      |      |

| 239      | [momadmitcond_swf]<br>Show the field ONLY if:<br>[momadmit_swf] = '1'                  | Was she told she had any of the following conditions during this visit? (check all that apply)                   | <table border="1"> <thead> <tr> <th colspan="3">checkbox</th> </tr> </thead> <tbody> <tr><td>1</td><td>momadmitcond_swf__1</td><td>Pre-eclampsia</td></tr> <tr><td>2</td><td>momadmitcond_swf__2</td><td>Eclampsia</td></tr> <tr><td>3</td><td>momadmitcond_swf__3</td><td>Diabetes</td></tr> <tr><td>4</td><td>momadmitcond_swf__4</td><td>Fistula</td></tr> <tr><td>5</td><td>momadmitcond_swf__5</td><td>HIV related illness</td></tr> <tr><td>6</td><td>momadmitcond_swf__6</td><td>Malaria</td></tr> <tr><td>7</td><td>momadmitcond_swf__7</td><td>Retained placenta</td></tr> <tr><td>8</td><td>momadmitcond_swf__8</td><td>Heavy bleeding</td></tr> <tr><td>9</td><td>momadmitcond_swf__9</td><td>Anemia</td></tr> <tr><td>10</td><td>momadmitcond_swf__10</td><td>Surgical site infection</td></tr> <tr><td>11</td><td>momadmitcond_swf__11</td><td>Puerperal sepsis</td></tr> <tr><td>12</td><td>momadmitcond_swf__12</td><td>Other infection</td></tr> <tr><td>13</td><td>momadmitcond_swf__13</td><td>Diarrhea</td></tr> <tr><td>14</td><td>momadmitcond_swf__14</td><td>Vomiting</td></tr> <tr><td>15</td><td>momadmitcond_swf__15</td><td>PPD/psychosis</td></tr> <tr><td>16</td><td>momadmitcond_swf__16</td><td>Needed another surgery</td></tr> <tr><td>17</td><td>momadmitcond_swf__17</td><td>Needed blood transfusion</td></tr> <tr><td>18</td><td>momadmitcond_swf__18</td><td>Needed oxygen</td></tr> <tr><td>98</td><td>momadmitcond_swf__98</td><td>Other (specify)</td></tr> <tr><td>99</td><td>momadmitcond_swf__99</td><td>None</td></tr> </tbody> </table> | checkbox |  |   | 1   | momadmitcond_swf__1   | Pre-eclampsia                        | 2 | momadmitcond_swf__2   | Eclampsia     | 3 | momadmitcond_swf__3   | Diabetes                                                  | 4  | momadmitcond_swf__4    | Fistula | 5 | momadmitcond_swf__5 | HIV related illness | 6 | momadmitcond_swf__6 | Malaria | 7 | momadmitcond_swf__7 | Retained placenta | 8 | momadmitcond_swf__8 | Heavy bleeding | 9 | momadmitcond_swf__9 | Anemia | 10 | momadmitcond_swf__10 | Surgical site infection | 11 | momadmitcond_swf__11 | Puerperal sepsis | 12 | momadmitcond_swf__12 | Other infection | 13 | momadmitcond_swf__13 | Diarrhea | 14 | momadmitcond_swf__14 | Vomiting | 15 | momadmitcond_swf__15 | PPD/psychosis | 16 | momadmitcond_swf__16 | Needed another surgery | 17 | momadmitcond_swf__17 | Needed blood transfusion | 18 | momadmitcond_swf__18 | Needed oxygen | 98 | momadmitcond_swf__98 | Other (specify) | 99 | momadmitcond_swf__99 | None |
|----------|----------------------------------------------------------------------------------------|------------------------------------------------------------------------------------------------------------------|---------------------------------------------------------------------------------------------------------------------------------------------------------------------------------------------------------------------------------------------------------------------------------------------------------------------------------------------------------------------------------------------------------------------------------------------------------------------------------------------------------------------------------------------------------------------------------------------------------------------------------------------------------------------------------------------------------------------------------------------------------------------------------------------------------------------------------------------------------------------------------------------------------------------------------------------------------------------------------------------------------------------------------------------------------------------------------------------------------------------------------------------------------------------------------------------------------------------------------------------------------------------------------------------------------------------------------------------------------------------------------------------------------------------------------------------------------------------------------------------------------------------------------------------------------------------------------------|----------|--|---|-----|-----------------------|--------------------------------------|---|-----------------------|---------------|---|-----------------------|-----------------------------------------------------------|----|------------------------|---------|---|---------------------|---------------------|---|---------------------|---------|---|---------------------|-------------------|---|---------------------|----------------|---|---------------------|--------|----|----------------------|-------------------------|----|----------------------|------------------|----|----------------------|-----------------|----|----------------------|----------|----|----------------------|----------|----|----------------------|---------------|----|----------------------|------------------------|----|----------------------|--------------------------|----|----------------------|---------------|----|----------------------|-----------------|----|----------------------|------|
| checkbox |                                                                                        |                                                                                                                  |                                                                                                                                                                                                                                                                                                                                                                                                                                                                                                                                                                                                                                                                                                                                                                                                                                                                                                                                                                                                                                                                                                                                                                                                                                                                                                                                                                                                                                                                                                                                                                                       |          |  |   |     |                       |                                      |   |                       |               |   |                       |                                                           |    |                        |         |   |                     |                     |   |                     |         |   |                     |                   |   |                     |                |   |                     |        |    |                      |                         |    |                      |                  |    |                      |                 |    |                      |          |    |                      |          |    |                      |               |    |                      |                        |    |                      |                          |    |                      |               |    |                      |                 |    |                      |      |
| 1        | momadmitcond_swf__1                                                                    | Pre-eclampsia                                                                                                    |                                                                                                                                                                                                                                                                                                                                                                                                                                                                                                                                                                                                                                                                                                                                                                                                                                                                                                                                                                                                                                                                                                                                                                                                                                                                                                                                                                                                                                                                                                                                                                                       |          |  |   |     |                       |                                      |   |                       |               |   |                       |                                                           |    |                        |         |   |                     |                     |   |                     |         |   |                     |                   |   |                     |                |   |                     |        |    |                      |                         |    |                      |                  |    |                      |                 |    |                      |          |    |                      |          |    |                      |               |    |                      |                        |    |                      |                          |    |                      |               |    |                      |                 |    |                      |      |
| 2        | momadmitcond_swf__2                                                                    | Eclampsia                                                                                                        |                                                                                                                                                                                                                                                                                                                                                                                                                                                                                                                                                                                                                                                                                                                                                                                                                                                                                                                                                                                                                                                                                                                                                                                                                                                                                                                                                                                                                                                                                                                                                                                       |          |  |   |     |                       |                                      |   |                       |               |   |                       |                                                           |    |                        |         |   |                     |                     |   |                     |         |   |                     |                   |   |                     |                |   |                     |        |    |                      |                         |    |                      |                  |    |                      |                 |    |                      |          |    |                      |          |    |                      |               |    |                      |                        |    |                      |                          |    |                      |               |    |                      |                 |    |                      |      |
| 3        | momadmitcond_swf__3                                                                    | Diabetes                                                                                                         |                                                                                                                                                                                                                                                                                                                                                                                                                                                                                                                                                                                                                                                                                                                                                                                                                                                                                                                                                                                                                                                                                                                                                                                                                                                                                                                                                                                                                                                                                                                                                                                       |          |  |   |     |                       |                                      |   |                       |               |   |                       |                                                           |    |                        |         |   |                     |                     |   |                     |         |   |                     |                   |   |                     |                |   |                     |        |    |                      |                         |    |                      |                  |    |                      |                 |    |                      |          |    |                      |          |    |                      |               |    |                      |                        |    |                      |                          |    |                      |               |    |                      |                 |    |                      |      |
| 4        | momadmitcond_swf__4                                                                    | Fistula                                                                                                          |                                                                                                                                                                                                                                                                                                                                                                                                                                                                                                                                                                                                                                                                                                                                                                                                                                                                                                                                                                                                                                                                                                                                                                                                                                                                                                                                                                                                                                                                                                                                                                                       |          |  |   |     |                       |                                      |   |                       |               |   |                       |                                                           |    |                        |         |   |                     |                     |   |                     |         |   |                     |                   |   |                     |                |   |                     |        |    |                      |                         |    |                      |                  |    |                      |                 |    |                      |          |    |                      |          |    |                      |               |    |                      |                        |    |                      |                          |    |                      |               |    |                      |                 |    |                      |      |
| 5        | momadmitcond_swf__5                                                                    | HIV related illness                                                                                              |                                                                                                                                                                                                                                                                                                                                                                                                                                                                                                                                                                                                                                                                                                                                                                                                                                                                                                                                                                                                                                                                                                                                                                                                                                                                                                                                                                                                                                                                                                                                                                                       |          |  |   |     |                       |                                      |   |                       |               |   |                       |                                                           |    |                        |         |   |                     |                     |   |                     |         |   |                     |                   |   |                     |                |   |                     |        |    |                      |                         |    |                      |                  |    |                      |                 |    |                      |          |    |                      |          |    |                      |               |    |                      |                        |    |                      |                          |    |                      |               |    |                      |                 |    |                      |      |
| 6        | momadmitcond_swf__6                                                                    | Malaria                                                                                                          |                                                                                                                                                                                                                                                                                                                                                                                                                                                                                                                                                                                                                                                                                                                                                                                                                                                                                                                                                                                                                                                                                                                                                                                                                                                                                                                                                                                                                                                                                                                                                                                       |          |  |   |     |                       |                                      |   |                       |               |   |                       |                                                           |    |                        |         |   |                     |                     |   |                     |         |   |                     |                   |   |                     |                |   |                     |        |    |                      |                         |    |                      |                  |    |                      |                 |    |                      |          |    |                      |          |    |                      |               |    |                      |                        |    |                      |                          |    |                      |               |    |                      |                 |    |                      |      |
| 7        | momadmitcond_swf__7                                                                    | Retained placenta                                                                                                |                                                                                                                                                                                                                                                                                                                                                                                                                                                                                                                                                                                                                                                                                                                                                                                                                                                                                                                                                                                                                                                                                                                                                                                                                                                                                                                                                                                                                                                                                                                                                                                       |          |  |   |     |                       |                                      |   |                       |               |   |                       |                                                           |    |                        |         |   |                     |                     |   |                     |         |   |                     |                   |   |                     |                |   |                     |        |    |                      |                         |    |                      |                  |    |                      |                 |    |                      |          |    |                      |          |    |                      |               |    |                      |                        |    |                      |                          |    |                      |               |    |                      |                 |    |                      |      |
| 8        | momadmitcond_swf__8                                                                    | Heavy bleeding                                                                                                   |                                                                                                                                                                                                                                                                                                                                                                                                                                                                                                                                                                                                                                                                                                                                                                                                                                                                                                                                                                                                                                                                                                                                                                                                                                                                                                                                                                                                                                                                                                                                                                                       |          |  |   |     |                       |                                      |   |                       |               |   |                       |                                                           |    |                        |         |   |                     |                     |   |                     |         |   |                     |                   |   |                     |                |   |                     |        |    |                      |                         |    |                      |                  |    |                      |                 |    |                      |          |    |                      |          |    |                      |               |    |                      |                        |    |                      |                          |    |                      |               |    |                      |                 |    |                      |      |
| 9        | momadmitcond_swf__9                                                                    | Anemia                                                                                                           |                                                                                                                                                                                                                                                                                                                                                                                                                                                                                                                                                                                                                                                                                                                                                                                                                                                                                                                                                                                                                                                                                                                                                                                                                                                                                                                                                                                                                                                                                                                                                                                       |          |  |   |     |                       |                                      |   |                       |               |   |                       |                                                           |    |                        |         |   |                     |                     |   |                     |         |   |                     |                   |   |                     |                |   |                     |        |    |                      |                         |    |                      |                  |    |                      |                 |    |                      |          |    |                      |          |    |                      |               |    |                      |                        |    |                      |                          |    |                      |               |    |                      |                 |    |                      |      |
| 10       | momadmitcond_swf__10                                                                   | Surgical site infection                                                                                          |                                                                                                                                                                                                                                                                                                                                                                                                                                                                                                                                                                                                                                                                                                                                                                                                                                                                                                                                                                                                                                                                                                                                                                                                                                                                                                                                                                                                                                                                                                                                                                                       |          |  |   |     |                       |                                      |   |                       |               |   |                       |                                                           |    |                        |         |   |                     |                     |   |                     |         |   |                     |                   |   |                     |                |   |                     |        |    |                      |                         |    |                      |                  |    |                      |                 |    |                      |          |    |                      |          |    |                      |               |    |                      |                        |    |                      |                          |    |                      |               |    |                      |                 |    |                      |      |
| 11       | momadmitcond_swf__11                                                                   | Puerperal sepsis                                                                                                 |                                                                                                                                                                                                                                                                                                                                                                                                                                                                                                                                                                                                                                                                                                                                                                                                                                                                                                                                                                                                                                                                                                                                                                                                                                                                                                                                                                                                                                                                                                                                                                                       |          |  |   |     |                       |                                      |   |                       |               |   |                       |                                                           |    |                        |         |   |                     |                     |   |                     |         |   |                     |                   |   |                     |                |   |                     |        |    |                      |                         |    |                      |                  |    |                      |                 |    |                      |          |    |                      |          |    |                      |               |    |                      |                        |    |                      |                          |    |                      |               |    |                      |                 |    |                      |      |
| 12       | momadmitcond_swf__12                                                                   | Other infection                                                                                                  |                                                                                                                                                                                                                                                                                                                                                                                                                                                                                                                                                                                                                                                                                                                                                                                                                                                                                                                                                                                                                                                                                                                                                                                                                                                                                                                                                                                                                                                                                                                                                                                       |          |  |   |     |                       |                                      |   |                       |               |   |                       |                                                           |    |                        |         |   |                     |                     |   |                     |         |   |                     |                   |   |                     |                |   |                     |        |    |                      |                         |    |                      |                  |    |                      |                 |    |                      |          |    |                      |          |    |                      |               |    |                      |                        |    |                      |                          |    |                      |               |    |                      |                 |    |                      |      |
| 13       | momadmitcond_swf__13                                                                   | Diarrhea                                                                                                         |                                                                                                                                                                                                                                                                                                                                                                                                                                                                                                                                                                                                                                                                                                                                                                                                                                                                                                                                                                                                                                                                                                                                                                                                                                                                                                                                                                                                                                                                                                                                                                                       |          |  |   |     |                       |                                      |   |                       |               |   |                       |                                                           |    |                        |         |   |                     |                     |   |                     |         |   |                     |                   |   |                     |                |   |                     |        |    |                      |                         |    |                      |                  |    |                      |                 |    |                      |          |    |                      |          |    |                      |               |    |                      |                        |    |                      |                          |    |                      |               |    |                      |                 |    |                      |      |
| 14       | momadmitcond_swf__14                                                                   | Vomiting                                                                                                         |                                                                                                                                                                                                                                                                                                                                                                                                                                                                                                                                                                                                                                                                                                                                                                                                                                                                                                                                                                                                                                                                                                                                                                                                                                                                                                                                                                                                                                                                                                                                                                                       |          |  |   |     |                       |                                      |   |                       |               |   |                       |                                                           |    |                        |         |   |                     |                     |   |                     |         |   |                     |                   |   |                     |                |   |                     |        |    |                      |                         |    |                      |                  |    |                      |                 |    |                      |          |    |                      |          |    |                      |               |    |                      |                        |    |                      |                          |    |                      |               |    |                      |                 |    |                      |      |
| 15       | momadmitcond_swf__15                                                                   | PPD/psychosis                                                                                                    |                                                                                                                                                                                                                                                                                                                                                                                                                                                                                                                                                                                                                                                                                                                                                                                                                                                                                                                                                                                                                                                                                                                                                                                                                                                                                                                                                                                                                                                                                                                                                                                       |          |  |   |     |                       |                                      |   |                       |               |   |                       |                                                           |    |                        |         |   |                     |                     |   |                     |         |   |                     |                   |   |                     |                |   |                     |        |    |                      |                         |    |                      |                  |    |                      |                 |    |                      |          |    |                      |          |    |                      |               |    |                      |                        |    |                      |                          |    |                      |               |    |                      |                 |    |                      |      |
| 16       | momadmitcond_swf__16                                                                   | Needed another surgery                                                                                           |                                                                                                                                                                                                                                                                                                                                                                                                                                                                                                                                                                                                                                                                                                                                                                                                                                                                                                                                                                                                                                                                                                                                                                                                                                                                                                                                                                                                                                                                                                                                                                                       |          |  |   |     |                       |                                      |   |                       |               |   |                       |                                                           |    |                        |         |   |                     |                     |   |                     |         |   |                     |                   |   |                     |                |   |                     |        |    |                      |                         |    |                      |                  |    |                      |                 |    |                      |          |    |                      |          |    |                      |               |    |                      |                        |    |                      |                          |    |                      |               |    |                      |                 |    |                      |      |
| 17       | momadmitcond_swf__17                                                                   | Needed blood transfusion                                                                                         |                                                                                                                                                                                                                                                                                                                                                                                                                                                                                                                                                                                                                                                                                                                                                                                                                                                                                                                                                                                                                                                                                                                                                                                                                                                                                                                                                                                                                                                                                                                                                                                       |          |  |   |     |                       |                                      |   |                       |               |   |                       |                                                           |    |                        |         |   |                     |                     |   |                     |         |   |                     |                   |   |                     |                |   |                     |        |    |                      |                         |    |                      |                  |    |                      |                 |    |                      |          |    |                      |          |    |                      |               |    |                      |                        |    |                      |                          |    |                      |               |    |                      |                 |    |                      |      |
| 18       | momadmitcond_swf__18                                                                   | Needed oxygen                                                                                                    |                                                                                                                                                                                                                                                                                                                                                                                                                                                                                                                                                                                                                                                                                                                                                                                                                                                                                                                                                                                                                                                                                                                                                                                                                                                                                                                                                                                                                                                                                                                                                                                       |          |  |   |     |                       |                                      |   |                       |               |   |                       |                                                           |    |                        |         |   |                     |                     |   |                     |         |   |                     |                   |   |                     |                |   |                     |        |    |                      |                         |    |                      |                  |    |                      |                 |    |                      |          |    |                      |          |    |                      |               |    |                      |                        |    |                      |                          |    |                      |               |    |                      |                 |    |                      |      |
| 98       | momadmitcond_swf__98                                                                   | Other (specify)                                                                                                  |                                                                                                                                                                                                                                                                                                                                                                                                                                                                                                                                                                                                                                                                                                                                                                                                                                                                                                                                                                                                                                                                                                                                                                                                                                                                                                                                                                                                                                                                                                                                                                                       |          |  |   |     |                       |                                      |   |                       |               |   |                       |                                                           |    |                        |         |   |                     |                     |   |                     |         |   |                     |                   |   |                     |                |   |                     |        |    |                      |                         |    |                      |                  |    |                      |                 |    |                      |          |    |                      |          |    |                      |               |    |                      |                        |    |                      |                          |    |                      |               |    |                      |                 |    |                      |      |
| 99       | momadmitcond_swf__99                                                                   | None                                                                                                             |                                                                                                                                                                                                                                                                                                                                                                                                                                                                                                                                                                                                                                                                                                                                                                                                                                                                                                                                                                                                                                                                                                                                                                                                                                                                                                                                                                                                                                                                                                                                                                                       |          |  |   |     |                       |                                      |   |                       |               |   |                       |                                                           |    |                        |         |   |                     |                     |   |                     |         |   |                     |                   |   |                     |                |   |                     |        |    |                      |                         |    |                      |                  |    |                      |                 |    |                      |          |    |                      |          |    |                      |               |    |                      |                        |    |                      |                          |    |                      |               |    |                      |                 |    |                      |      |
| 240      | [momadmitcondother_swf]<br>Show the field ONLY if:<br>[momadmitcond_swf(98)] = '1'     | Other condition:                                                                                                 | text                                                                                                                                                                                                                                                                                                                                                                                                                                                                                                                                                                                                                                                                                                                                                                                                                                                                                                                                                                                                                                                                                                                                                                                                                                                                                                                                                                                                                                                                                                                                                                                  |          |  |   |     |                       |                                      |   |                       |               |   |                       |                                                           |    |                        |         |   |                     |                     |   |                     |         |   |                     |                   |   |                     |                |   |                     |        |    |                      |                         |    |                      |                  |    |                      |                 |    |                      |          |    |                      |          |    |                      |               |    |                      |                        |    |                      |                          |    |                      |               |    |                      |                 |    |                      |      |
| 241      | [momseek_swf]<br>Show the field ONLY if:<br>[momalive_swf] = '1'                       | Did she seek care at a facility at any time after being home post-discharge that DID NOT result in an admission? | <table border="1"> <thead> <tr> <th colspan="2">yesno</th> </tr> </thead> <tbody> <tr> <td>1</td> <td>Yes</td> </tr> <tr> <td>0</td> <td>No</td> </tr> </tbody> </table>                                                                                                                                                                                                                                                                                                                                                                                                                                                                                                                                                                                                                                                                                                                                                                                                                                                                                                                                                                                                                                                                                                                                                                                                                                                                                                                                                                                                              | yesno    |  | 1 | Yes | 0                     | No                                   |   |                       |               |   |                       |                                                           |    |                        |         |   |                     |                     |   |                     |         |   |                     |                   |   |                     |                |   |                     |        |    |                      |                         |    |                      |                  |    |                      |                 |    |                      |          |    |                      |          |    |                      |               |    |                      |                        |    |                      |                          |    |                      |               |    |                      |                 |    |                      |      |
| yesno    |                                                                                        |                                                                                                                  |                                                                                                                                                                                                                                                                                                                                                                                                                                                                                                                                                                                                                                                                                                                                                                                                                                                                                                                                                                                                                                                                                                                                                                                                                                                                                                                                                                                                                                                                                                                                                                                       |          |  |   |     |                       |                                      |   |                       |               |   |                       |                                                           |    |                        |         |   |                     |                     |   |                     |         |   |                     |                   |   |                     |                |   |                     |        |    |                      |                         |    |                      |                  |    |                      |                 |    |                      |          |    |                      |          |    |                      |               |    |                      |                        |    |                      |                          |    |                      |               |    |                      |                 |    |                      |      |
| 1        | Yes                                                                                    |                                                                                                                  |                                                                                                                                                                                                                                                                                                                                                                                                                                                                                                                                                                                                                                                                                                                                                                                                                                                                                                                                                                                                                                                                                                                                                                                                                                                                                                                                                                                                                                                                                                                                                                                       |          |  |   |     |                       |                                      |   |                       |               |   |                       |                                                           |    |                        |         |   |                     |                     |   |                     |         |   |                     |                   |   |                     |                |   |                     |        |    |                      |                         |    |                      |                  |    |                      |                 |    |                      |          |    |                      |          |    |                      |               |    |                      |                        |    |                      |                          |    |                      |               |    |                      |                 |    |                      |      |
| 0        | No                                                                                     |                                                                                                                  |                                                                                                                                                                                                                                                                                                                                                                                                                                                                                                                                                                                                                                                                                                                                                                                                                                                                                                                                                                                                                                                                                                                                                                                                                                                                                                                                                                                                                                                                                                                                                                                       |          |  |   |     |                       |                                      |   |                       |               |   |                       |                                                           |    |                        |         |   |                     |                     |   |                     |         |   |                     |                   |   |                     |                |   |                     |        |    |                      |                         |    |                      |                  |    |                      |                 |    |                      |          |    |                      |          |    |                      |               |    |                      |                        |    |                      |                          |    |                      |               |    |                      |                 |    |                      |      |
| 242      | [momseekdate_swf]<br>Show the field ONLY if:<br>[momseek_swf] = '1'                    | Date of first care seeking visit:                                                                                | text (date_dmy)                                                                                                                                                                                                                                                                                                                                                                                                                                                                                                                                                                                                                                                                                                                                                                                                                                                                                                                                                                                                                                                                                                                                                                                                                                                                                                                                                                                                                                                                                                                                                                       |          |  |   |     |                       |                                      |   |                       |               |   |                       |                                                           |    |                        |         |   |                     |                     |   |                     |         |   |                     |                   |   |                     |                |   |                     |        |    |                      |                         |    |                      |                  |    |                      |                 |    |                      |          |    |                      |          |    |                      |               |    |                      |                        |    |                      |                          |    |                      |               |    |                      |                 |    |                      |      |
| 243      | [momseekpathway_swf]<br>Show the field ONLY if:<br>[momseek_swf] = '1'                 | What was the care-seeking pathway for this visit?                                                                | <table border="1"> <thead> <tr> <th colspan="3">checkbox</th> </tr> </thead> <tbody> <tr><td>1</td><td>momseekpathway_swf__1</td><td>Routine PNC visit identified problem</td></tr> <tr><td>2</td><td>momseekpathway_swf__2</td><td>Self referral</td></tr> <tr><td>3</td><td>momseekpathway_swf__3</td><td>Both self-referral and PNC visit resulted in care seeking</td></tr> <tr><td>98</td><td>momseekpathway_swf__98</td><td>Other</td></tr> </tbody> </table>                                                                                                                                                                                                                                                                                                                                                                                                                                                                                                                                                                                                                                                                                                                                                                                                                                                                                                                                                                                                                                                                                                                   | checkbox |  |   | 1   | momseekpathway_swf__1 | Routine PNC visit identified problem | 2 | momseekpathway_swf__2 | Self referral | 3 | momseekpathway_swf__3 | Both self-referral and PNC visit resulted in care seeking | 98 | momseekpathway_swf__98 | Other   |   |                     |                     |   |                     |         |   |                     |                   |   |                     |                |   |                     |        |    |                      |                         |    |                      |                  |    |                      |                 |    |                      |          |    |                      |          |    |                      |               |    |                      |                        |    |                      |                          |    |                      |               |    |                      |                 |    |                      |      |
| checkbox |                                                                                        |                                                                                                                  |                                                                                                                                                                                                                                                                                                                                                                                                                                                                                                                                                                                                                                                                                                                                                                                                                                                                                                                                                                                                                                                                                                                                                                                                                                                                                                                                                                                                                                                                                                                                                                                       |          |  |   |     |                       |                                      |   |                       |               |   |                       |                                                           |    |                        |         |   |                     |                     |   |                     |         |   |                     |                   |   |                     |                |   |                     |        |    |                      |                         |    |                      |                  |    |                      |                 |    |                      |          |    |                      |          |    |                      |               |    |                      |                        |    |                      |                          |    |                      |               |    |                      |                 |    |                      |      |
| 1        | momseekpathway_swf__1                                                                  | Routine PNC visit identified problem                                                                             |                                                                                                                                                                                                                                                                                                                                                                                                                                                                                                                                                                                                                                                                                                                                                                                                                                                                                                                                                                                                                                                                                                                                                                                                                                                                                                                                                                                                                                                                                                                                                                                       |          |  |   |     |                       |                                      |   |                       |               |   |                       |                                                           |    |                        |         |   |                     |                     |   |                     |         |   |                     |                   |   |                     |                |   |                     |        |    |                      |                         |    |                      |                  |    |                      |                 |    |                      |          |    |                      |          |    |                      |               |    |                      |                        |    |                      |                          |    |                      |               |    |                      |                 |    |                      |      |
| 2        | momseekpathway_swf__2                                                                  | Self referral                                                                                                    |                                                                                                                                                                                                                                                                                                                                                                                                                                                                                                                                                                                                                                                                                                                                                                                                                                                                                                                                                                                                                                                                                                                                                                                                                                                                                                                                                                                                                                                                                                                                                                                       |          |  |   |     |                       |                                      |   |                       |               |   |                       |                                                           |    |                        |         |   |                     |                     |   |                     |         |   |                     |                   |   |                     |                |   |                     |        |    |                      |                         |    |                      |                  |    |                      |                 |    |                      |          |    |                      |          |    |                      |               |    |                      |                        |    |                      |                          |    |                      |               |    |                      |                 |    |                      |      |
| 3        | momseekpathway_swf__3                                                                  | Both self-referral and PNC visit resulted in care seeking                                                        |                                                                                                                                                                                                                                                                                                                                                                                                                                                                                                                                                                                                                                                                                                                                                                                                                                                                                                                                                                                                                                                                                                                                                                                                                                                                                                                                                                                                                                                                                                                                                                                       |          |  |   |     |                       |                                      |   |                       |               |   |                       |                                                           |    |                        |         |   |                     |                     |   |                     |         |   |                     |                   |   |                     |                |   |                     |        |    |                      |                         |    |                      |                  |    |                      |                 |    |                      |          |    |                      |          |    |                      |               |    |                      |                        |    |                      |                          |    |                      |               |    |                      |                 |    |                      |      |
| 98       | momseekpathway_swf__98                                                                 | Other                                                                                                            |                                                                                                                                                                                                                                                                                                                                                                                                                                                                                                                                                                                                                                                                                                                                                                                                                                                                                                                                                                                                                                                                                                                                                                                                                                                                                                                                                                                                                                                                                                                                                                                       |          |  |   |     |                       |                                      |   |                       |               |   |                       |                                                           |    |                        |         |   |                     |                     |   |                     |         |   |                     |                   |   |                     |                |   |                     |        |    |                      |                         |    |                      |                  |    |                      |                 |    |                      |          |    |                      |          |    |                      |               |    |                      |                        |    |                      |                          |    |                      |               |    |                      |                 |    |                      |      |
| 244      | [momseekpathwayother_swf]<br>Show the field ONLY if:<br>[momseekpathway_swf(98)] = '1' | Other pathway:                                                                                                   | text                                                                                                                                                                                                                                                                                                                                                                                                                                                                                                                                                                                                                                                                                                                                                                                                                                                                                                                                                                                                                                                                                                                                                                                                                                                                                                                                                                                                                                                                                                                                                                                  |          |  |   |     |                       |                                      |   |                       |               |   |                       |                                                           |    |                        |         |   |                     |                     |   |                     |         |   |                     |                   |   |                     |                |   |                     |        |    |                      |                         |    |                      |                  |    |                      |                 |    |                      |          |    |                      |          |    |                      |               |    |                      |                        |    |                      |                          |    |                      |               |    |                      |                 |    |                      |      |

|     |                                                                                              |                                                                                           |                                                                                                                                                                                                                                                                                                                                                                                                                                                                                                                                                                                                                                                                                                                                                                                                                                                                                                                                                                                                                                                                                                                                                                                                                                                                                                                                                                                                                                                                                                                                                                                                                                                                                                                                                                                                                                                                                                                                            |   |                    |                        |   |                    |                                |   |                    |                                                        |   |                    |                    |   |                    |             |   |                    |                     |   |                    |                   |   |                    |                          |   |                    |                         |    |                     |                |    |                     |                                   |    |                     |                                 |    |                     |                             |    |                     |                            |    |                     |                    |    |                     |                   |    |                     |                     |    |                     |                 |    |                     |                |    |                     |             |    |                     |                       |    |                     |                 |    |                     |      |
|-----|----------------------------------------------------------------------------------------------|-------------------------------------------------------------------------------------------|--------------------------------------------------------------------------------------------------------------------------------------------------------------------------------------------------------------------------------------------------------------------------------------------------------------------------------------------------------------------------------------------------------------------------------------------------------------------------------------------------------------------------------------------------------------------------------------------------------------------------------------------------------------------------------------------------------------------------------------------------------------------------------------------------------------------------------------------------------------------------------------------------------------------------------------------------------------------------------------------------------------------------------------------------------------------------------------------------------------------------------------------------------------------------------------------------------------------------------------------------------------------------------------------------------------------------------------------------------------------------------------------------------------------------------------------------------------------------------------------------------------------------------------------------------------------------------------------------------------------------------------------------------------------------------------------------------------------------------------------------------------------------------------------------------------------------------------------------------------------------------------------------------------------------------------------|---|--------------------|------------------------|---|--------------------|--------------------------------|---|--------------------|--------------------------------------------------------|---|--------------------|--------------------|---|--------------------|-------------|---|--------------------|---------------------|---|--------------------|-------------------|---|--------------------|--------------------------|---|--------------------|-------------------------|----|---------------------|----------------|----|---------------------|-----------------------------------|----|---------------------|---------------------------------|----|---------------------|-----------------------------|----|---------------------|----------------------------|----|---------------------|--------------------|----|---------------------|-------------------|----|---------------------|---------------------|----|---------------------|-----------------|----|---------------------|----------------|----|---------------------|-------------|----|---------------------|-----------------------|----|---------------------|-----------------|----|---------------------|------|
| 245 | <p>[momseeksymp_swf]</p> <p>Show the field ONLY if:<br/>[momseek_swf] = '1'</p>              | <p>What were the symptoms she experienced during this illness (check all that apply)?</p> | <p>checkbox</p> <table border="1"> <tr><td>1</td><td>momseeksymp_swf__1</td><td>Heavy vaginal bleeding</td></tr> <tr><td>2</td><td>momseeksymp_swf__2</td><td>Bleeding from nose/ eyes/ ears</td></tr> <tr><td>3</td><td>momseeksymp_swf__3</td><td>Petechiae (small red dots and bruises across the skin)</td></tr> <tr><td>4</td><td>momseeksymp_swf__4</td><td>Abnormal tiredness</td></tr> <tr><td>5</td><td>momseeksymp_swf__5</td><td>Convulsions</td></tr> <tr><td>6</td><td>momseeksymp_swf__6</td><td>Shortness of breath</td></tr> <tr><td>7</td><td>momseeksymp_swf__7</td><td>Changes in vision</td></tr> <tr><td>8</td><td>momseeksymp_swf__8</td><td>Severe headache &lt; 24 hrs</td></tr> <tr><td>9</td><td>momseeksymp_swf__9</td><td>Severe headache &gt;24 hrs</td></tr> <tr><td>10</td><td>momseeksymp_swf__10</td><td>Abdominal pain</td></tr> <tr><td>11</td><td>momseeksymp_swf__11</td><td>Abdominal tenderness when touched</td></tr> <tr><td>12</td><td>momseeksymp_swf__12</td><td>Foul smelling vaginal discharge</td></tr> <tr><td>13</td><td>momseeksymp_swf__13</td><td>Fever/ body hotness &lt; 7days</td></tr> <tr><td>14</td><td>momseeksymp_swf__14</td><td>Fever/ body hotness &gt;7days</td></tr> <tr><td>15</td><td>momseeksymp_swf__15</td><td>Diarrhea &lt; 14 days</td></tr> <tr><td>16</td><td>momseeksymp_swf__16</td><td>Diarrhea &gt;14 days</td></tr> <tr><td>17</td><td>momseeksymp_swf__17</td><td>Vomiting everything</td></tr> <tr><td>18</td><td>momseeksymp_swf__18</td><td>Cough &lt; 14 days</td></tr> <tr><td>19</td><td>momseeksymp_swf__19</td><td>Cough &gt;14 days</td></tr> <tr><td>20</td><td>momseeksymp_swf__20</td><td>Yellow eyes</td></tr> <tr><td>21</td><td>momseeksymp_swf__21</td><td>Loss of consciousness</td></tr> <tr><td>98</td><td>momseeksymp_swf__98</td><td>Other (specify)</td></tr> <tr><td>99</td><td>momseeksymp_swf__99</td><td>None</td></tr> </table> | 1 | momseeksymp_swf__1 | Heavy vaginal bleeding | 2 | momseeksymp_swf__2 | Bleeding from nose/ eyes/ ears | 3 | momseeksymp_swf__3 | Petechiae (small red dots and bruises across the skin) | 4 | momseeksymp_swf__4 | Abnormal tiredness | 5 | momseeksymp_swf__5 | Convulsions | 6 | momseeksymp_swf__6 | Shortness of breath | 7 | momseeksymp_swf__7 | Changes in vision | 8 | momseeksymp_swf__8 | Severe headache < 24 hrs | 9 | momseeksymp_swf__9 | Severe headache >24 hrs | 10 | momseeksymp_swf__10 | Abdominal pain | 11 | momseeksymp_swf__11 | Abdominal tenderness when touched | 12 | momseeksymp_swf__12 | Foul smelling vaginal discharge | 13 | momseeksymp_swf__13 | Fever/ body hotness < 7days | 14 | momseeksymp_swf__14 | Fever/ body hotness >7days | 15 | momseeksymp_swf__15 | Diarrhea < 14 days | 16 | momseeksymp_swf__16 | Diarrhea >14 days | 17 | momseeksymp_swf__17 | Vomiting everything | 18 | momseeksymp_swf__18 | Cough < 14 days | 19 | momseeksymp_swf__19 | Cough >14 days | 20 | momseeksymp_swf__20 | Yellow eyes | 21 | momseeksymp_swf__21 | Loss of consciousness | 98 | momseeksymp_swf__98 | Other (specify) | 99 | momseeksymp_swf__99 | None |
| 1   | momseeksymp_swf__1                                                                           | Heavy vaginal bleeding                                                                    |                                                                                                                                                                                                                                                                                                                                                                                                                                                                                                                                                                                                                                                                                                                                                                                                                                                                                                                                                                                                                                                                                                                                                                                                                                                                                                                                                                                                                                                                                                                                                                                                                                                                                                                                                                                                                                                                                                                                            |   |                    |                        |   |                    |                                |   |                    |                                                        |   |                    |                    |   |                    |             |   |                    |                     |   |                    |                   |   |                    |                          |   |                    |                         |    |                     |                |    |                     |                                   |    |                     |                                 |    |                     |                             |    |                     |                            |    |                     |                    |    |                     |                   |    |                     |                     |    |                     |                 |    |                     |                |    |                     |             |    |                     |                       |    |                     |                 |    |                     |      |
| 2   | momseeksymp_swf__2                                                                           | Bleeding from nose/ eyes/ ears                                                            |                                                                                                                                                                                                                                                                                                                                                                                                                                                                                                                                                                                                                                                                                                                                                                                                                                                                                                                                                                                                                                                                                                                                                                                                                                                                                                                                                                                                                                                                                                                                                                                                                                                                                                                                                                                                                                                                                                                                            |   |                    |                        |   |                    |                                |   |                    |                                                        |   |                    |                    |   |                    |             |   |                    |                     |   |                    |                   |   |                    |                          |   |                    |                         |    |                     |                |    |                     |                                   |    |                     |                                 |    |                     |                             |    |                     |                            |    |                     |                    |    |                     |                   |    |                     |                     |    |                     |                 |    |                     |                |    |                     |             |    |                     |                       |    |                     |                 |    |                     |      |
| 3   | momseeksymp_swf__3                                                                           | Petechiae (small red dots and bruises across the skin)                                    |                                                                                                                                                                                                                                                                                                                                                                                                                                                                                                                                                                                                                                                                                                                                                                                                                                                                                                                                                                                                                                                                                                                                                                                                                                                                                                                                                                                                                                                                                                                                                                                                                                                                                                                                                                                                                                                                                                                                            |   |                    |                        |   |                    |                                |   |                    |                                                        |   |                    |                    |   |                    |             |   |                    |                     |   |                    |                   |   |                    |                          |   |                    |                         |    |                     |                |    |                     |                                   |    |                     |                                 |    |                     |                             |    |                     |                            |    |                     |                    |    |                     |                   |    |                     |                     |    |                     |                 |    |                     |                |    |                     |             |    |                     |                       |    |                     |                 |    |                     |      |
| 4   | momseeksymp_swf__4                                                                           | Abnormal tiredness                                                                        |                                                                                                                                                                                                                                                                                                                                                                                                                                                                                                                                                                                                                                                                                                                                                                                                                                                                                                                                                                                                                                                                                                                                                                                                                                                                                                                                                                                                                                                                                                                                                                                                                                                                                                                                                                                                                                                                                                                                            |   |                    |                        |   |                    |                                |   |                    |                                                        |   |                    |                    |   |                    |             |   |                    |                     |   |                    |                   |   |                    |                          |   |                    |                         |    |                     |                |    |                     |                                   |    |                     |                                 |    |                     |                             |    |                     |                            |    |                     |                    |    |                     |                   |    |                     |                     |    |                     |                 |    |                     |                |    |                     |             |    |                     |                       |    |                     |                 |    |                     |      |
| 5   | momseeksymp_swf__5                                                                           | Convulsions                                                                               |                                                                                                                                                                                                                                                                                                                                                                                                                                                                                                                                                                                                                                                                                                                                                                                                                                                                                                                                                                                                                                                                                                                                                                                                                                                                                                                                                                                                                                                                                                                                                                                                                                                                                                                                                                                                                                                                                                                                            |   |                    |                        |   |                    |                                |   |                    |                                                        |   |                    |                    |   |                    |             |   |                    |                     |   |                    |                   |   |                    |                          |   |                    |                         |    |                     |                |    |                     |                                   |    |                     |                                 |    |                     |                             |    |                     |                            |    |                     |                    |    |                     |                   |    |                     |                     |    |                     |                 |    |                     |                |    |                     |             |    |                     |                       |    |                     |                 |    |                     |      |
| 6   | momseeksymp_swf__6                                                                           | Shortness of breath                                                                       |                                                                                                                                                                                                                                                                                                                                                                                                                                                                                                                                                                                                                                                                                                                                                                                                                                                                                                                                                                                                                                                                                                                                                                                                                                                                                                                                                                                                                                                                                                                                                                                                                                                                                                                                                                                                                                                                                                                                            |   |                    |                        |   |                    |                                |   |                    |                                                        |   |                    |                    |   |                    |             |   |                    |                     |   |                    |                   |   |                    |                          |   |                    |                         |    |                     |                |    |                     |                                   |    |                     |                                 |    |                     |                             |    |                     |                            |    |                     |                    |    |                     |                   |    |                     |                     |    |                     |                 |    |                     |                |    |                     |             |    |                     |                       |    |                     |                 |    |                     |      |
| 7   | momseeksymp_swf__7                                                                           | Changes in vision                                                                         |                                                                                                                                                                                                                                                                                                                                                                                                                                                                                                                                                                                                                                                                                                                                                                                                                                                                                                                                                                                                                                                                                                                                                                                                                                                                                                                                                                                                                                                                                                                                                                                                                                                                                                                                                                                                                                                                                                                                            |   |                    |                        |   |                    |                                |   |                    |                                                        |   |                    |                    |   |                    |             |   |                    |                     |   |                    |                   |   |                    |                          |   |                    |                         |    |                     |                |    |                     |                                   |    |                     |                                 |    |                     |                             |    |                     |                            |    |                     |                    |    |                     |                   |    |                     |                     |    |                     |                 |    |                     |                |    |                     |             |    |                     |                       |    |                     |                 |    |                     |      |
| 8   | momseeksymp_swf__8                                                                           | Severe headache < 24 hrs                                                                  |                                                                                                                                                                                                                                                                                                                                                                                                                                                                                                                                                                                                                                                                                                                                                                                                                                                                                                                                                                                                                                                                                                                                                                                                                                                                                                                                                                                                                                                                                                                                                                                                                                                                                                                                                                                                                                                                                                                                            |   |                    |                        |   |                    |                                |   |                    |                                                        |   |                    |                    |   |                    |             |   |                    |                     |   |                    |                   |   |                    |                          |   |                    |                         |    |                     |                |    |                     |                                   |    |                     |                                 |    |                     |                             |    |                     |                            |    |                     |                    |    |                     |                   |    |                     |                     |    |                     |                 |    |                     |                |    |                     |             |    |                     |                       |    |                     |                 |    |                     |      |
| 9   | momseeksymp_swf__9                                                                           | Severe headache >24 hrs                                                                   |                                                                                                                                                                                                                                                                                                                                                                                                                                                                                                                                                                                                                                                                                                                                                                                                                                                                                                                                                                                                                                                                                                                                                                                                                                                                                                                                                                                                                                                                                                                                                                                                                                                                                                                                                                                                                                                                                                                                            |   |                    |                        |   |                    |                                |   |                    |                                                        |   |                    |                    |   |                    |             |   |                    |                     |   |                    |                   |   |                    |                          |   |                    |                         |    |                     |                |    |                     |                                   |    |                     |                                 |    |                     |                             |    |                     |                            |    |                     |                    |    |                     |                   |    |                     |                     |    |                     |                 |    |                     |                |    |                     |             |    |                     |                       |    |                     |                 |    |                     |      |
| 10  | momseeksymp_swf__10                                                                          | Abdominal pain                                                                            |                                                                                                                                                                                                                                                                                                                                                                                                                                                                                                                                                                                                                                                                                                                                                                                                                                                                                                                                                                                                                                                                                                                                                                                                                                                                                                                                                                                                                                                                                                                                                                                                                                                                                                                                                                                                                                                                                                                                            |   |                    |                        |   |                    |                                |   |                    |                                                        |   |                    |                    |   |                    |             |   |                    |                     |   |                    |                   |   |                    |                          |   |                    |                         |    |                     |                |    |                     |                                   |    |                     |                                 |    |                     |                             |    |                     |                            |    |                     |                    |    |                     |                   |    |                     |                     |    |                     |                 |    |                     |                |    |                     |             |    |                     |                       |    |                     |                 |    |                     |      |
| 11  | momseeksymp_swf__11                                                                          | Abdominal tenderness when touched                                                         |                                                                                                                                                                                                                                                                                                                                                                                                                                                                                                                                                                                                                                                                                                                                                                                                                                                                                                                                                                                                                                                                                                                                                                                                                                                                                                                                                                                                                                                                                                                                                                                                                                                                                                                                                                                                                                                                                                                                            |   |                    |                        |   |                    |                                |   |                    |                                                        |   |                    |                    |   |                    |             |   |                    |                     |   |                    |                   |   |                    |                          |   |                    |                         |    |                     |                |    |                     |                                   |    |                     |                                 |    |                     |                             |    |                     |                            |    |                     |                    |    |                     |                   |    |                     |                     |    |                     |                 |    |                     |                |    |                     |             |    |                     |                       |    |                     |                 |    |                     |      |
| 12  | momseeksymp_swf__12                                                                          | Foul smelling vaginal discharge                                                           |                                                                                                                                                                                                                                                                                                                                                                                                                                                                                                                                                                                                                                                                                                                                                                                                                                                                                                                                                                                                                                                                                                                                                                                                                                                                                                                                                                                                                                                                                                                                                                                                                                                                                                                                                                                                                                                                                                                                            |   |                    |                        |   |                    |                                |   |                    |                                                        |   |                    |                    |   |                    |             |   |                    |                     |   |                    |                   |   |                    |                          |   |                    |                         |    |                     |                |    |                     |                                   |    |                     |                                 |    |                     |                             |    |                     |                            |    |                     |                    |    |                     |                   |    |                     |                     |    |                     |                 |    |                     |                |    |                     |             |    |                     |                       |    |                     |                 |    |                     |      |
| 13  | momseeksymp_swf__13                                                                          | Fever/ body hotness < 7days                                                               |                                                                                                                                                                                                                                                                                                                                                                                                                                                                                                                                                                                                                                                                                                                                                                                                                                                                                                                                                                                                                                                                                                                                                                                                                                                                                                                                                                                                                                                                                                                                                                                                                                                                                                                                                                                                                                                                                                                                            |   |                    |                        |   |                    |                                |   |                    |                                                        |   |                    |                    |   |                    |             |   |                    |                     |   |                    |                   |   |                    |                          |   |                    |                         |    |                     |                |    |                     |                                   |    |                     |                                 |    |                     |                             |    |                     |                            |    |                     |                    |    |                     |                   |    |                     |                     |    |                     |                 |    |                     |                |    |                     |             |    |                     |                       |    |                     |                 |    |                     |      |
| 14  | momseeksymp_swf__14                                                                          | Fever/ body hotness >7days                                                                |                                                                                                                                                                                                                                                                                                                                                                                                                                                                                                                                                                                                                                                                                                                                                                                                                                                                                                                                                                                                                                                                                                                                                                                                                                                                                                                                                                                                                                                                                                                                                                                                                                                                                                                                                                                                                                                                                                                                            |   |                    |                        |   |                    |                                |   |                    |                                                        |   |                    |                    |   |                    |             |   |                    |                     |   |                    |                   |   |                    |                          |   |                    |                         |    |                     |                |    |                     |                                   |    |                     |                                 |    |                     |                             |    |                     |                            |    |                     |                    |    |                     |                   |    |                     |                     |    |                     |                 |    |                     |                |    |                     |             |    |                     |                       |    |                     |                 |    |                     |      |
| 15  | momseeksymp_swf__15                                                                          | Diarrhea < 14 days                                                                        |                                                                                                                                                                                                                                                                                                                                                                                                                                                                                                                                                                                                                                                                                                                                                                                                                                                                                                                                                                                                                                                                                                                                                                                                                                                                                                                                                                                                                                                                                                                                                                                                                                                                                                                                                                                                                                                                                                                                            |   |                    |                        |   |                    |                                |   |                    |                                                        |   |                    |                    |   |                    |             |   |                    |                     |   |                    |                   |   |                    |                          |   |                    |                         |    |                     |                |    |                     |                                   |    |                     |                                 |    |                     |                             |    |                     |                            |    |                     |                    |    |                     |                   |    |                     |                     |    |                     |                 |    |                     |                |    |                     |             |    |                     |                       |    |                     |                 |    |                     |      |
| 16  | momseeksymp_swf__16                                                                          | Diarrhea >14 days                                                                         |                                                                                                                                                                                                                                                                                                                                                                                                                                                                                                                                                                                                                                                                                                                                                                                                                                                                                                                                                                                                                                                                                                                                                                                                                                                                                                                                                                                                                                                                                                                                                                                                                                                                                                                                                                                                                                                                                                                                            |   |                    |                        |   |                    |                                |   |                    |                                                        |   |                    |                    |   |                    |             |   |                    |                     |   |                    |                   |   |                    |                          |   |                    |                         |    |                     |                |    |                     |                                   |    |                     |                                 |    |                     |                             |    |                     |                            |    |                     |                    |    |                     |                   |    |                     |                     |    |                     |                 |    |                     |                |    |                     |             |    |                     |                       |    |                     |                 |    |                     |      |
| 17  | momseeksymp_swf__17                                                                          | Vomiting everything                                                                       |                                                                                                                                                                                                                                                                                                                                                                                                                                                                                                                                                                                                                                                                                                                                                                                                                                                                                                                                                                                                                                                                                                                                                                                                                                                                                                                                                                                                                                                                                                                                                                                                                                                                                                                                                                                                                                                                                                                                            |   |                    |                        |   |                    |                                |   |                    |                                                        |   |                    |                    |   |                    |             |   |                    |                     |   |                    |                   |   |                    |                          |   |                    |                         |    |                     |                |    |                     |                                   |    |                     |                                 |    |                     |                             |    |                     |                            |    |                     |                    |    |                     |                   |    |                     |                     |    |                     |                 |    |                     |                |    |                     |             |    |                     |                       |    |                     |                 |    |                     |      |
| 18  | momseeksymp_swf__18                                                                          | Cough < 14 days                                                                           |                                                                                                                                                                                                                                                                                                                                                                                                                                                                                                                                                                                                                                                                                                                                                                                                                                                                                                                                                                                                                                                                                                                                                                                                                                                                                                                                                                                                                                                                                                                                                                                                                                                                                                                                                                                                                                                                                                                                            |   |                    |                        |   |                    |                                |   |                    |                                                        |   |                    |                    |   |                    |             |   |                    |                     |   |                    |                   |   |                    |                          |   |                    |                         |    |                     |                |    |                     |                                   |    |                     |                                 |    |                     |                             |    |                     |                            |    |                     |                    |    |                     |                   |    |                     |                     |    |                     |                 |    |                     |                |    |                     |             |    |                     |                       |    |                     |                 |    |                     |      |
| 19  | momseeksymp_swf__19                                                                          | Cough >14 days                                                                            |                                                                                                                                                                                                                                                                                                                                                                                                                                                                                                                                                                                                                                                                                                                                                                                                                                                                                                                                                                                                                                                                                                                                                                                                                                                                                                                                                                                                                                                                                                                                                                                                                                                                                                                                                                                                                                                                                                                                            |   |                    |                        |   |                    |                                |   |                    |                                                        |   |                    |                    |   |                    |             |   |                    |                     |   |                    |                   |   |                    |                          |   |                    |                         |    |                     |                |    |                     |                                   |    |                     |                                 |    |                     |                             |    |                     |                            |    |                     |                    |    |                     |                   |    |                     |                     |    |                     |                 |    |                     |                |    |                     |             |    |                     |                       |    |                     |                 |    |                     |      |
| 20  | momseeksymp_swf__20                                                                          | Yellow eyes                                                                               |                                                                                                                                                                                                                                                                                                                                                                                                                                                                                                                                                                                                                                                                                                                                                                                                                                                                                                                                                                                                                                                                                                                                                                                                                                                                                                                                                                                                                                                                                                                                                                                                                                                                                                                                                                                                                                                                                                                                            |   |                    |                        |   |                    |                                |   |                    |                                                        |   |                    |                    |   |                    |             |   |                    |                     |   |                    |                   |   |                    |                          |   |                    |                         |    |                     |                |    |                     |                                   |    |                     |                                 |    |                     |                             |    |                     |                            |    |                     |                    |    |                     |                   |    |                     |                     |    |                     |                 |    |                     |                |    |                     |             |    |                     |                       |    |                     |                 |    |                     |      |
| 21  | momseeksymp_swf__21                                                                          | Loss of consciousness                                                                     |                                                                                                                                                                                                                                                                                                                                                                                                                                                                                                                                                                                                                                                                                                                                                                                                                                                                                                                                                                                                                                                                                                                                                                                                                                                                                                                                                                                                                                                                                                                                                                                                                                                                                                                                                                                                                                                                                                                                            |   |                    |                        |   |                    |                                |   |                    |                                                        |   |                    |                    |   |                    |             |   |                    |                     |   |                    |                   |   |                    |                          |   |                    |                         |    |                     |                |    |                     |                                   |    |                     |                                 |    |                     |                             |    |                     |                            |    |                     |                    |    |                     |                   |    |                     |                     |    |                     |                 |    |                     |                |    |                     |             |    |                     |                       |    |                     |                 |    |                     |      |
| 98  | momseeksymp_swf__98                                                                          | Other (specify)                                                                           |                                                                                                                                                                                                                                                                                                                                                                                                                                                                                                                                                                                                                                                                                                                                                                                                                                                                                                                                                                                                                                                                                                                                                                                                                                                                                                                                                                                                                                                                                                                                                                                                                                                                                                                                                                                                                                                                                                                                            |   |                    |                        |   |                    |                                |   |                    |                                                        |   |                    |                    |   |                    |             |   |                    |                     |   |                    |                   |   |                    |                          |   |                    |                         |    |                     |                |    |                     |                                   |    |                     |                                 |    |                     |                             |    |                     |                            |    |                     |                    |    |                     |                   |    |                     |                     |    |                     |                 |    |                     |                |    |                     |             |    |                     |                       |    |                     |                 |    |                     |      |
| 99  | momseeksymp_swf__99                                                                          | None                                                                                      |                                                                                                                                                                                                                                                                                                                                                                                                                                                                                                                                                                                                                                                                                                                                                                                                                                                                                                                                                                                                                                                                                                                                                                                                                                                                                                                                                                                                                                                                                                                                                                                                                                                                                                                                                                                                                                                                                                                                            |   |                    |                        |   |                    |                                |   |                    |                                                        |   |                    |                    |   |                    |             |   |                    |                     |   |                    |                   |   |                    |                          |   |                    |                         |    |                     |                |    |                     |                                   |    |                     |                                 |    |                     |                             |    |                     |                            |    |                     |                    |    |                     |                   |    |                     |                     |    |                     |                 |    |                     |                |    |                     |             |    |                     |                       |    |                     |                 |    |                     |      |
| 246 | <p>[momseeksympother_swf]</p> <p>Show the field ONLY if:<br/>[momseeksymp_swf(98)] = '1'</p> | <p>Other symptom:</p>                                                                     | <p>text</p>                                                                                                                                                                                                                                                                                                                                                                                                                                                                                                                                                                                                                                                                                                                                                                                                                                                                                                                                                                                                                                                                                                                                                                                                                                                                                                                                                                                                                                                                                                                                                                                                                                                                                                                                                                                                                                                                                                                                |   |                    |                        |   |                    |                                |   |                    |                                                        |   |                    |                    |   |                    |             |   |                    |                     |   |                    |                   |   |                    |                          |   |                    |                         |    |                     |                |    |                     |                                   |    |                     |                                 |    |                     |                             |    |                     |                            |    |                     |                    |    |                     |                   |    |                     |                     |    |                     |                 |    |                     |                |    |                     |             |    |                     |                       |    |                     |                 |    |                     |      |

|                                                                                  |                                                                                  |                                                                                                                                                                       |                                                                                                                                                                                                                                                                                                                                                                                                                                                                                                                                                                                                                                                                                                                                                                                                                                                                                                                                                                                                                                                                                                                                                                                                                                                                                                                                                                                                                                                                                    |   |                    |               |            |                    |           |   |                    |          |    |                    |         |   |                    |     |   |                    |         |   |                    |                   |   |                    |                |   |                    |        |    |                     |                         |    |                     |                  |    |                     |                 |    |                     |          |    |                     |          |    |                     |               |    |                     |                        |    |                     |                          |    |                     |               |    |                     |                 |    |                     |      |
|----------------------------------------------------------------------------------|----------------------------------------------------------------------------------|-----------------------------------------------------------------------------------------------------------------------------------------------------------------------|------------------------------------------------------------------------------------------------------------------------------------------------------------------------------------------------------------------------------------------------------------------------------------------------------------------------------------------------------------------------------------------------------------------------------------------------------------------------------------------------------------------------------------------------------------------------------------------------------------------------------------------------------------------------------------------------------------------------------------------------------------------------------------------------------------------------------------------------------------------------------------------------------------------------------------------------------------------------------------------------------------------------------------------------------------------------------------------------------------------------------------------------------------------------------------------------------------------------------------------------------------------------------------------------------------------------------------------------------------------------------------------------------------------------------------------------------------------------------------|---|--------------------|---------------|------------|--------------------|-----------|---|--------------------|----------|----|--------------------|---------|---|--------------------|-----|---|--------------------|---------|---|--------------------|-------------------|---|--------------------|----------------|---|--------------------|--------|----|---------------------|-------------------------|----|---------------------|------------------|----|---------------------|-----------------|----|---------------------|----------|----|---------------------|----------|----|---------------------|---------------|----|---------------------|------------------------|----|---------------------|--------------------------|----|---------------------|---------------|----|---------------------|-----------------|----|---------------------|------|
| 247                                                                              | [momseekcond_swf]<br>Show the field ONLY if:<br>[momseek_swf] = '1'              | Was she told she had any of the following conditions during this visit (check all that apply)?                                                                        | checkbox<br><table border="1"> <tr><td>1</td><td>momseekcond_swf__1</td><td>Pre-eclampsia</td></tr> <tr><td>2</td><td>momseekcond_swf__2</td><td>Eclampsia</td></tr> <tr><td>3</td><td>momseekcond_swf__3</td><td>Diabetes</td></tr> <tr><td>4</td><td>momseekcond_swf__4</td><td>Fistula</td></tr> <tr><td>5</td><td>momseekcond_swf__5</td><td>HIV</td></tr> <tr><td>6</td><td>momseekcond_swf__6</td><td>Malaria</td></tr> <tr><td>7</td><td>momseekcond_swf__7</td><td>Retained placenta</td></tr> <tr><td>8</td><td>momseekcond_swf__8</td><td>Heavy bleeding</td></tr> <tr><td>9</td><td>momseekcond_swf__9</td><td>Anemia</td></tr> <tr><td>10</td><td>momseekcond_swf__10</td><td>Surgical site infection</td></tr> <tr><td>11</td><td>momseekcond_swf__11</td><td>Puerperal sepsis</td></tr> <tr><td>12</td><td>momseekcond_swf__12</td><td>Other infection</td></tr> <tr><td>13</td><td>momseekcond_swf__13</td><td>Diarrhea</td></tr> <tr><td>14</td><td>momseekcond_swf__14</td><td>Vomiting</td></tr> <tr><td>15</td><td>momseekcond_swf__15</td><td>PPD/psychosis</td></tr> <tr><td>16</td><td>momseekcond_swf__16</td><td>Needed another surgery</td></tr> <tr><td>17</td><td>momseekcond_swf__17</td><td>Needed blood transfusion</td></tr> <tr><td>18</td><td>momseekcond_swf__18</td><td>Needed oxygen</td></tr> <tr><td>98</td><td>momseekcond_swf__98</td><td>Other (specify)</td></tr> <tr><td>99</td><td>momseekcond_swf__99</td><td>None</td></tr> </table> | 1 | momseekcond_swf__1 | Pre-eclampsia | 2          | momseekcond_swf__2 | Eclampsia | 3 | momseekcond_swf__3 | Diabetes | 4  | momseekcond_swf__4 | Fistula | 5 | momseekcond_swf__5 | HIV | 6 | momseekcond_swf__6 | Malaria | 7 | momseekcond_swf__7 | Retained placenta | 8 | momseekcond_swf__8 | Heavy bleeding | 9 | momseekcond_swf__9 | Anemia | 10 | momseekcond_swf__10 | Surgical site infection | 11 | momseekcond_swf__11 | Puerperal sepsis | 12 | momseekcond_swf__12 | Other infection | 13 | momseekcond_swf__13 | Diarrhea | 14 | momseekcond_swf__14 | Vomiting | 15 | momseekcond_swf__15 | PPD/psychosis | 16 | momseekcond_swf__16 | Needed another surgery | 17 | momseekcond_swf__17 | Needed blood transfusion | 18 | momseekcond_swf__18 | Needed oxygen | 98 | momseekcond_swf__98 | Other (specify) | 99 | momseekcond_swf__99 | None |
| 1                                                                                | momseekcond_swf__1                                                               | Pre-eclampsia                                                                                                                                                         |                                                                                                                                                                                                                                                                                                                                                                                                                                                                                                                                                                                                                                                                                                                                                                                                                                                                                                                                                                                                                                                                                                                                                                                                                                                                                                                                                                                                                                                                                    |   |                    |               |            |                    |           |   |                    |          |    |                    |         |   |                    |     |   |                    |         |   |                    |                   |   |                    |                |   |                    |        |    |                     |                         |    |                     |                  |    |                     |                 |    |                     |          |    |                     |          |    |                     |               |    |                     |                        |    |                     |                          |    |                     |               |    |                     |                 |    |                     |      |
| 2                                                                                | momseekcond_swf__2                                                               | Eclampsia                                                                                                                                                             |                                                                                                                                                                                                                                                                                                                                                                                                                                                                                                                                                                                                                                                                                                                                                                                                                                                                                                                                                                                                                                                                                                                                                                                                                                                                                                                                                                                                                                                                                    |   |                    |               |            |                    |           |   |                    |          |    |                    |         |   |                    |     |   |                    |         |   |                    |                   |   |                    |                |   |                    |        |    |                     |                         |    |                     |                  |    |                     |                 |    |                     |          |    |                     |          |    |                     |               |    |                     |                        |    |                     |                          |    |                     |               |    |                     |                 |    |                     |      |
| 3                                                                                | momseekcond_swf__3                                                               | Diabetes                                                                                                                                                              |                                                                                                                                                                                                                                                                                                                                                                                                                                                                                                                                                                                                                                                                                                                                                                                                                                                                                                                                                                                                                                                                                                                                                                                                                                                                                                                                                                                                                                                                                    |   |                    |               |            |                    |           |   |                    |          |    |                    |         |   |                    |     |   |                    |         |   |                    |                   |   |                    |                |   |                    |        |    |                     |                         |    |                     |                  |    |                     |                 |    |                     |          |    |                     |          |    |                     |               |    |                     |                        |    |                     |                          |    |                     |               |    |                     |                 |    |                     |      |
| 4                                                                                | momseekcond_swf__4                                                               | Fistula                                                                                                                                                               |                                                                                                                                                                                                                                                                                                                                                                                                                                                                                                                                                                                                                                                                                                                                                                                                                                                                                                                                                                                                                                                                                                                                                                                                                                                                                                                                                                                                                                                                                    |   |                    |               |            |                    |           |   |                    |          |    |                    |         |   |                    |     |   |                    |         |   |                    |                   |   |                    |                |   |                    |        |    |                     |                         |    |                     |                  |    |                     |                 |    |                     |          |    |                     |          |    |                     |               |    |                     |                        |    |                     |                          |    |                     |               |    |                     |                 |    |                     |      |
| 5                                                                                | momseekcond_swf__5                                                               | HIV                                                                                                                                                                   |                                                                                                                                                                                                                                                                                                                                                                                                                                                                                                                                                                                                                                                                                                                                                                                                                                                                                                                                                                                                                                                                                                                                                                                                                                                                                                                                                                                                                                                                                    |   |                    |               |            |                    |           |   |                    |          |    |                    |         |   |                    |     |   |                    |         |   |                    |                   |   |                    |                |   |                    |        |    |                     |                         |    |                     |                  |    |                     |                 |    |                     |          |    |                     |          |    |                     |               |    |                     |                        |    |                     |                          |    |                     |               |    |                     |                 |    |                     |      |
| 6                                                                                | momseekcond_swf__6                                                               | Malaria                                                                                                                                                               |                                                                                                                                                                                                                                                                                                                                                                                                                                                                                                                                                                                                                                                                                                                                                                                                                                                                                                                                                                                                                                                                                                                                                                                                                                                                                                                                                                                                                                                                                    |   |                    |               |            |                    |           |   |                    |          |    |                    |         |   |                    |     |   |                    |         |   |                    |                   |   |                    |                |   |                    |        |    |                     |                         |    |                     |                  |    |                     |                 |    |                     |          |    |                     |          |    |                     |               |    |                     |                        |    |                     |                          |    |                     |               |    |                     |                 |    |                     |      |
| 7                                                                                | momseekcond_swf__7                                                               | Retained placenta                                                                                                                                                     |                                                                                                                                                                                                                                                                                                                                                                                                                                                                                                                                                                                                                                                                                                                                                                                                                                                                                                                                                                                                                                                                                                                                                                                                                                                                                                                                                                                                                                                                                    |   |                    |               |            |                    |           |   |                    |          |    |                    |         |   |                    |     |   |                    |         |   |                    |                   |   |                    |                |   |                    |        |    |                     |                         |    |                     |                  |    |                     |                 |    |                     |          |    |                     |          |    |                     |               |    |                     |                        |    |                     |                          |    |                     |               |    |                     |                 |    |                     |      |
| 8                                                                                | momseekcond_swf__8                                                               | Heavy bleeding                                                                                                                                                        |                                                                                                                                                                                                                                                                                                                                                                                                                                                                                                                                                                                                                                                                                                                                                                                                                                                                                                                                                                                                                                                                                                                                                                                                                                                                                                                                                                                                                                                                                    |   |                    |               |            |                    |           |   |                    |          |    |                    |         |   |                    |     |   |                    |         |   |                    |                   |   |                    |                |   |                    |        |    |                     |                         |    |                     |                  |    |                     |                 |    |                     |          |    |                     |          |    |                     |               |    |                     |                        |    |                     |                          |    |                     |               |    |                     |                 |    |                     |      |
| 9                                                                                | momseekcond_swf__9                                                               | Anemia                                                                                                                                                                |                                                                                                                                                                                                                                                                                                                                                                                                                                                                                                                                                                                                                                                                                                                                                                                                                                                                                                                                                                                                                                                                                                                                                                                                                                                                                                                                                                                                                                                                                    |   |                    |               |            |                    |           |   |                    |          |    |                    |         |   |                    |     |   |                    |         |   |                    |                   |   |                    |                |   |                    |        |    |                     |                         |    |                     |                  |    |                     |                 |    |                     |          |    |                     |          |    |                     |               |    |                     |                        |    |                     |                          |    |                     |               |    |                     |                 |    |                     |      |
| 10                                                                               | momseekcond_swf__10                                                              | Surgical site infection                                                                                                                                               |                                                                                                                                                                                                                                                                                                                                                                                                                                                                                                                                                                                                                                                                                                                                                                                                                                                                                                                                                                                                                                                                                                                                                                                                                                                                                                                                                                                                                                                                                    |   |                    |               |            |                    |           |   |                    |          |    |                    |         |   |                    |     |   |                    |         |   |                    |                   |   |                    |                |   |                    |        |    |                     |                         |    |                     |                  |    |                     |                 |    |                     |          |    |                     |          |    |                     |               |    |                     |                        |    |                     |                          |    |                     |               |    |                     |                 |    |                     |      |
| 11                                                                               | momseekcond_swf__11                                                              | Puerperal sepsis                                                                                                                                                      |                                                                                                                                                                                                                                                                                                                                                                                                                                                                                                                                                                                                                                                                                                                                                                                                                                                                                                                                                                                                                                                                                                                                                                                                                                                                                                                                                                                                                                                                                    |   |                    |               |            |                    |           |   |                    |          |    |                    |         |   |                    |     |   |                    |         |   |                    |                   |   |                    |                |   |                    |        |    |                     |                         |    |                     |                  |    |                     |                 |    |                     |          |    |                     |          |    |                     |               |    |                     |                        |    |                     |                          |    |                     |               |    |                     |                 |    |                     |      |
| 12                                                                               | momseekcond_swf__12                                                              | Other infection                                                                                                                                                       |                                                                                                                                                                                                                                                                                                                                                                                                                                                                                                                                                                                                                                                                                                                                                                                                                                                                                                                                                                                                                                                                                                                                                                                                                                                                                                                                                                                                                                                                                    |   |                    |               |            |                    |           |   |                    |          |    |                    |         |   |                    |     |   |                    |         |   |                    |                   |   |                    |                |   |                    |        |    |                     |                         |    |                     |                  |    |                     |                 |    |                     |          |    |                     |          |    |                     |               |    |                     |                        |    |                     |                          |    |                     |               |    |                     |                 |    |                     |      |
| 13                                                                               | momseekcond_swf__13                                                              | Diarrhea                                                                                                                                                              |                                                                                                                                                                                                                                                                                                                                                                                                                                                                                                                                                                                                                                                                                                                                                                                                                                                                                                                                                                                                                                                                                                                                                                                                                                                                                                                                                                                                                                                                                    |   |                    |               |            |                    |           |   |                    |          |    |                    |         |   |                    |     |   |                    |         |   |                    |                   |   |                    |                |   |                    |        |    |                     |                         |    |                     |                  |    |                     |                 |    |                     |          |    |                     |          |    |                     |               |    |                     |                        |    |                     |                          |    |                     |               |    |                     |                 |    |                     |      |
| 14                                                                               | momseekcond_swf__14                                                              | Vomiting                                                                                                                                                              |                                                                                                                                                                                                                                                                                                                                                                                                                                                                                                                                                                                                                                                                                                                                                                                                                                                                                                                                                                                                                                                                                                                                                                                                                                                                                                                                                                                                                                                                                    |   |                    |               |            |                    |           |   |                    |          |    |                    |         |   |                    |     |   |                    |         |   |                    |                   |   |                    |                |   |                    |        |    |                     |                         |    |                     |                  |    |                     |                 |    |                     |          |    |                     |          |    |                     |               |    |                     |                        |    |                     |                          |    |                     |               |    |                     |                 |    |                     |      |
| 15                                                                               | momseekcond_swf__15                                                              | PPD/psychosis                                                                                                                                                         |                                                                                                                                                                                                                                                                                                                                                                                                                                                                                                                                                                                                                                                                                                                                                                                                                                                                                                                                                                                                                                                                                                                                                                                                                                                                                                                                                                                                                                                                                    |   |                    |               |            |                    |           |   |                    |          |    |                    |         |   |                    |     |   |                    |         |   |                    |                   |   |                    |                |   |                    |        |    |                     |                         |    |                     |                  |    |                     |                 |    |                     |          |    |                     |          |    |                     |               |    |                     |                        |    |                     |                          |    |                     |               |    |                     |                 |    |                     |      |
| 16                                                                               | momseekcond_swf__16                                                              | Needed another surgery                                                                                                                                                |                                                                                                                                                                                                                                                                                                                                                                                                                                                                                                                                                                                                                                                                                                                                                                                                                                                                                                                                                                                                                                                                                                                                                                                                                                                                                                                                                                                                                                                                                    |   |                    |               |            |                    |           |   |                    |          |    |                    |         |   |                    |     |   |                    |         |   |                    |                   |   |                    |                |   |                    |        |    |                     |                         |    |                     |                  |    |                     |                 |    |                     |          |    |                     |          |    |                     |               |    |                     |                        |    |                     |                          |    |                     |               |    |                     |                 |    |                     |      |
| 17                                                                               | momseekcond_swf__17                                                              | Needed blood transfusion                                                                                                                                              |                                                                                                                                                                                                                                                                                                                                                                                                                                                                                                                                                                                                                                                                                                                                                                                                                                                                                                                                                                                                                                                                                                                                                                                                                                                                                                                                                                                                                                                                                    |   |                    |               |            |                    |           |   |                    |          |    |                    |         |   |                    |     |   |                    |         |   |                    |                   |   |                    |                |   |                    |        |    |                     |                         |    |                     |                  |    |                     |                 |    |                     |          |    |                     |          |    |                     |               |    |                     |                        |    |                     |                          |    |                     |               |    |                     |                 |    |                     |      |
| 18                                                                               | momseekcond_swf__18                                                              | Needed oxygen                                                                                                                                                         |                                                                                                                                                                                                                                                                                                                                                                                                                                                                                                                                                                                                                                                                                                                                                                                                                                                                                                                                                                                                                                                                                                                                                                                                                                                                                                                                                                                                                                                                                    |   |                    |               |            |                    |           |   |                    |          |    |                    |         |   |                    |     |   |                    |         |   |                    |                   |   |                    |                |   |                    |        |    |                     |                         |    |                     |                  |    |                     |                 |    |                     |          |    |                     |          |    |                     |               |    |                     |                        |    |                     |                          |    |                     |               |    |                     |                 |    |                     |      |
| 98                                                                               | momseekcond_swf__98                                                              | Other (specify)                                                                                                                                                       |                                                                                                                                                                                                                                                                                                                                                                                                                                                                                                                                                                                                                                                                                                                                                                                                                                                                                                                                                                                                                                                                                                                                                                                                                                                                                                                                                                                                                                                                                    |   |                    |               |            |                    |           |   |                    |          |    |                    |         |   |                    |     |   |                    |         |   |                    |                   |   |                    |                |   |                    |        |    |                     |                         |    |                     |                  |    |                     |                 |    |                     |          |    |                     |          |    |                     |               |    |                     |                        |    |                     |                          |    |                     |               |    |                     |                 |    |                     |      |
| 99                                                                               | momseekcond_swf__99                                                              | None                                                                                                                                                                  |                                                                                                                                                                                                                                                                                                                                                                                                                                                                                                                                                                                                                                                                                                                                                                                                                                                                                                                                                                                                                                                                                                                                                                                                                                                                                                                                                                                                                                                                                    |   |                    |               |            |                    |           |   |                    |          |    |                    |         |   |                    |     |   |                    |         |   |                    |                   |   |                    |                |   |                    |        |    |                     |                         |    |                     |                  |    |                     |                 |    |                     |          |    |                     |          |    |                     |               |    |                     |                        |    |                     |                          |    |                     |               |    |                     |                 |    |                     |      |
| 248                                                                              | [momseekcondother_swf]<br>Show the field ONLY if:<br>[momseekcond_swf(98)] = '1' | Other condition:                                                                                                                                                      | text                                                                                                                                                                                                                                                                                                                                                                                                                                                                                                                                                                                                                                                                                                                                                                                                                                                                                                                                                                                                                                                                                                                                                                                                                                                                                                                                                                                                                                                                               |   |                    |               |            |                    |           |   |                    |          |    |                    |         |   |                    |     |   |                    |         |   |                    |                   |   |                    |                |   |                    |        |    |                     |                         |    |                     |                  |    |                     |                 |    |                     |          |    |                     |          |    |                     |               |    |                     |                        |    |                     |                          |    |                     |               |    |                     |                 |    |                     |      |
| 249                                                                              | [pnc_mom_swf]<br>Show the field ONLY if:<br>[dischstat_mat] != '3'               | Section Header: <i>PNC Visits</i><br>How many PNC visits were conducted in the first 6 weeks after delivery to assess the condition of the mother (NOT for the baby)? | dropdown<br><table border="1"> <tr><td>0</td><td>0</td></tr> <tr><td>1</td><td>1</td></tr> <tr><td>2</td><td>2</td></tr> <tr><td>3</td><td>3</td></tr> <tr><td>4</td><td>&gt;3</td></tr> </table>                                                                                                                                                                                                                                                                                                                                                                                                                                                                                                                                                                                                                                                                                                                                                                                                                                                                                                                                                                                                                                                                                                                                                                                                                                                                                  | 0 | 0                  | 1             | 1          | 2                  | 2         | 3 | 3                  | 4        | >3 |                    |         |   |                    |     |   |                    |         |   |                    |                   |   |                    |                |   |                    |        |    |                     |                         |    |                     |                  |    |                     |                 |    |                     |          |    |                     |          |    |                     |               |    |                     |                        |    |                     |                          |    |                     |               |    |                     |                 |    |                     |      |
| 0                                                                                | 0                                                                                |                                                                                                                                                                       |                                                                                                                                                                                                                                                                                                                                                                                                                                                                                                                                                                                                                                                                                                                                                                                                                                                                                                                                                                                                                                                                                                                                                                                                                                                                                                                                                                                                                                                                                    |   |                    |               |            |                    |           |   |                    |          |    |                    |         |   |                    |     |   |                    |         |   |                    |                   |   |                    |                |   |                    |        |    |                     |                         |    |                     |                  |    |                     |                 |    |                     |          |    |                     |          |    |                     |               |    |                     |                        |    |                     |                          |    |                     |               |    |                     |                 |    |                     |      |
| 1                                                                                | 1                                                                                |                                                                                                                                                                       |                                                                                                                                                                                                                                                                                                                                                                                                                                                                                                                                                                                                                                                                                                                                                                                                                                                                                                                                                                                                                                                                                                                                                                                                                                                                                                                                                                                                                                                                                    |   |                    |               |            |                    |           |   |                    |          |    |                    |         |   |                    |     |   |                    |         |   |                    |                   |   |                    |                |   |                    |        |    |                     |                         |    |                     |                  |    |                     |                 |    |                     |          |    |                     |          |    |                     |               |    |                     |                        |    |                     |                          |    |                     |               |    |                     |                 |    |                     |      |
| 2                                                                                | 2                                                                                |                                                                                                                                                                       |                                                                                                                                                                                                                                                                                                                                                                                                                                                                                                                                                                                                                                                                                                                                                                                                                                                                                                                                                                                                                                                                                                                                                                                                                                                                                                                                                                                                                                                                                    |   |                    |               |            |                    |           |   |                    |          |    |                    |         |   |                    |     |   |                    |         |   |                    |                   |   |                    |                |   |                    |        |    |                     |                         |    |                     |                  |    |                     |                 |    |                     |          |    |                     |          |    |                     |               |    |                     |                        |    |                     |                          |    |                     |               |    |                     |                 |    |                     |      |
| 3                                                                                | 3                                                                                |                                                                                                                                                                       |                                                                                                                                                                                                                                                                                                                                                                                                                                                                                                                                                                                                                                                                                                                                                                                                                                                                                                                                                                                                                                                                                                                                                                                                                                                                                                                                                                                                                                                                                    |   |                    |               |            |                    |           |   |                    |          |    |                    |         |   |                    |     |   |                    |         |   |                    |                   |   |                    |                |   |                    |        |    |                     |                         |    |                     |                  |    |                     |                 |    |                     |          |    |                     |          |    |                     |               |    |                     |                        |    |                     |                          |    |                     |               |    |                     |                 |    |                     |      |
| 4                                                                                | >3                                                                               |                                                                                                                                                                       |                                                                                                                                                                                                                                                                                                                                                                                                                                                                                                                                                                                                                                                                                                                                                                                                                                                                                                                                                                                                                                                                                                                                                                                                                                                                                                                                                                                                                                                                                    |   |                    |               |            |                    |           |   |                    |          |    |                    |         |   |                    |     |   |                    |         |   |                    |                   |   |                    |                |   |                    |        |    |                     |                         |    |                     |                  |    |                     |                 |    |                     |          |    |                     |          |    |                     |               |    |                     |                        |    |                     |                          |    |                     |               |    |                     |                 |    |                     |      |
| 250                                                                              | [mompnc1_swf]<br>Show the field ONLY if:<br>[pnc_mom_swf] > 0                    | How many days after delivery did the first visit take place?                                                                                                          | text (integer, Min: 1, Max: 42)                                                                                                                                                                                                                                                                                                                                                                                                                                                                                                                                                                                                                                                                                                                                                                                                                                                                                                                                                                                                                                                                                                                                                                                                                                                                                                                                                                                                                                                    |   |                    |               |            |                    |           |   |                    |          |    |                    |         |   |                    |     |   |                    |         |   |                    |                   |   |                    |                |   |                    |        |    |                     |                         |    |                     |                  |    |                     |                 |    |                     |          |    |                     |          |    |                     |               |    |                     |                        |    |                     |                          |    |                     |               |    |                     |                 |    |                     |      |
| 251                                                                              | [mompnc2_swf]<br>Show the field ONLY if:<br>[pnc_mom_swf] > 1                    | How many days after delivery did the second visit take place?                                                                                                         | text (integer, Min: 1, Max: 42)                                                                                                                                                                                                                                                                                                                                                                                                                                                                                                                                                                                                                                                                                                                                                                                                                                                                                                                                                                                                                                                                                                                                                                                                                                                                                                                                                                                                                                                    |   |                    |               |            |                    |           |   |                    |          |    |                    |         |   |                    |     |   |                    |         |   |                    |                   |   |                    |                |   |                    |        |    |                     |                         |    |                     |                  |    |                     |                 |    |                     |          |    |                     |          |    |                     |               |    |                     |                        |    |                     |                          |    |                     |               |    |                     |                 |    |                     |      |
| 252                                                                              | [mompnc3_swf]<br>Show the field ONLY if:<br>[pnc_mom_swf] > 2                    | How many days after delivery did the third visit take place?                                                                                                          | text (integer, Min: 1, Max: 42)                                                                                                                                                                                                                                                                                                                                                                                                                                                                                                                                                                                                                                                                                                                                                                                                                                                                                                                                                                                                                                                                                                                                                                                                                                                                                                                                                                                                                                                    |   |                    |               |            |                    |           |   |                    |          |    |                    |         |   |                    |     |   |                    |         |   |                    |                   |   |                    |                |   |                    |        |    |                     |                         |    |                     |                  |    |                     |                 |    |                     |          |    |                     |          |    |                     |               |    |                     |                        |    |                     |                          |    |                     |               |    |                     |                 |    |                     |      |
| 253                                                                              | [comment_swf]                                                                    | Comment                                                                                                                                                               | notes                                                                                                                                                                                                                                                                                                                                                                                                                                                                                                                                                                                                                                                                                                                                                                                                                                                                                                                                                                                                                                                                                                                                                                                                                                                                                                                                                                                                                                                                              |   |                    |               |            |                    |           |   |                    |          |    |                    |         |   |                    |     |   |                    |         |   |                    |                   |   |                    |                |   |                    |        |    |                     |                         |    |                     |                  |    |                     |                 |    |                     |          |    |                     |          |    |                     |               |    |                     |                        |    |                     |                          |    |                     |               |    |                     |                 |    |                     |      |
| 254                                                                              | [numbabyinstr_swf]                                                               | This woman delivered [numbabe_del] baby (babies). Please complete [numbabe_del] six-week follow-up neonatal instances.                                                | descriptive                                                                                                                                                                                                                                                                                                                                                                                                                                                                                                                                                                                                                                                                                                                                                                                                                                                                                                                                                                                                                                                                                                                                                                                                                                                                                                                                                                                                                                                                        |   |                    |               |            |                    |           |   |                    |          |    |                    |         |   |                    |     |   |                    |         |   |                    |                   |   |                    |                |   |                    |        |    |                     |                         |    |                     |                  |    |                     |                 |    |                     |          |    |                     |          |    |                     |               |    |                     |                        |    |                     |                          |    |                     |               |    |                     |                 |    |                     |      |
| 255                                                                              | [six_week_follow_up_maternal_complete]                                           | Section Header: <i>Form Status</i><br>Complete?                                                                                                                       | dropdown<br><table border="1"> <tr><td>0</td><td>Incomplete</td></tr> <tr><td>1</td><td>Unverified</td></tr> <tr><td>2</td><td>Complete</td></tr> </table>                                                                                                                                                                                                                                                                                                                                                                                                                                                                                                                                                                                                                                                                                                                                                                                                                                                                                                                                                                                                                                                                                                                                                                                                                                                                                                                         | 0 | Incomplete         | 1             | Unverified | 2                  | Complete  |   |                    |          |    |                    |         |   |                    |     |   |                    |         |   |                    |                   |   |                    |                |   |                    |        |    |                     |                         |    |                     |                  |    |                     |                 |    |                     |          |    |                     |          |    |                     |               |    |                     |                        |    |                     |                          |    |                     |               |    |                     |                 |    |                     |      |
| 0                                                                                | Incomplete                                                                       |                                                                                                                                                                       |                                                                                                                                                                                                                                                                                                                                                                                                                                                                                                                                                                                                                                                                                                                                                                                                                                                                                                                                                                                                                                                                                                                                                                                                                                                                                                                                                                                                                                                                                    |   |                    |               |            |                    |           |   |                    |          |    |                    |         |   |                    |     |   |                    |         |   |                    |                   |   |                    |                |   |                    |        |    |                     |                         |    |                     |                  |    |                     |                 |    |                     |          |    |                     |          |    |                     |               |    |                     |                        |    |                     |                          |    |                     |               |    |                     |                 |    |                     |      |
| 1                                                                                | Unverified                                                                       |                                                                                                                                                                       |                                                                                                                                                                                                                                                                                                                                                                                                                                                                                                                                                                                                                                                                                                                                                                                                                                                                                                                                                                                                                                                                                                                                                                                                                                                                                                                                                                                                                                                                                    |   |                    |               |            |                    |           |   |                    |          |    |                    |         |   |                    |     |   |                    |         |   |                    |                   |   |                    |                |   |                    |        |    |                     |                         |    |                     |                  |    |                     |                 |    |                     |          |    |                     |          |    |                     |               |    |                     |                        |    |                     |                          |    |                     |               |    |                     |                 |    |                     |      |
| 2                                                                                | Complete                                                                         |                                                                                                                                                                       |                                                                                                                                                                                                                                                                                                                                                                                                                                                                                                                                                                                                                                                                                                                                                                                                                                                                                                                                                                                                                                                                                                                                                                                                                                                                                                                                                                                                                                                                                    |   |                    |               |            |                    |           |   |                    |          |    |                    |         |   |                    |     |   |                    |         |   |                    |                   |   |                    |                |   |                    |        |    |                     |                         |    |                     |                  |    |                     |                 |    |                     |          |    |                     |          |    |                     |               |    |                     |                        |    |                     |                          |    |                     |               |    |                     |                 |    |                     |      |
| Instrument: <b>11. Six Week Follow Up Neonatal</b> (six_week_follow_up_neonatal) |                                                                                  |                                                                                                                                                                       |                                                                                                                                                                                                                                                                                                                                                                                                                                                                                                                                                                                                                                                                                                                                                                                                                                                                                                                                                                                                                                                                                                                                                                                                                                                                                                                                                                                                                                                                                    |   |                    |               |            |                    |           |   |                    |          |    |                    |         |   |                    |     |   |                    |         |   |                    |                   |   |                    |                |   |                    |        |    |                     |                         |    |                     |                  |    |                     |                 |    |                     |          |    |                     |          |    |                     |               |    |                     |                        |    |                     |                          |    |                     |               |    |                     |                 |    |                     |      |
| 256                                                                              | [babenum_swf]                                                                    | Baby #[current-instance] of [numbabe_del]                                                                                                                             | descriptive                                                                                                                                                                                                                                                                                                                                                                                                                                                                                                                                                                                                                                                                                                                                                                                                                                                                                                                                                                                                                                                                                                                                                                                                                                                                                                                                                                                                                                                                        |   |                    |               |            |                    |           |   |                    |          |    |                    |         |   |                    |     |   |                    |         |   |                    |                   |   |                    |                |   |                    |        |    |                     |                         |    |                     |                  |    |                     |                 |    |                     |          |    |                     |          |    |                     |               |    |                     |                        |    |                     |                          |    |                     |               |    |                     |                 |    |                     |      |

|     |                                                                                                                                            |                                                                                                                                                                    |                                                                                                                                                                                                                                                                                       |
|-----|--------------------------------------------------------------------------------------------------------------------------------------------|--------------------------------------------------------------------------------------------------------------------------------------------------------------------|---------------------------------------------------------------------------------------------------------------------------------------------------------------------------------------------------------------------------------------------------------------------------------------|
| 257 | [babledied_swf]<br>Show the field ONLY if:<br>[dispbb_neo][current-instance] = '3' or [admitdisposition_neo][current-instance] = '1'       | This baby died in hospital. Please mark this form as "Complete", and continue to the next baby if applicable.                                                      | descriptive                                                                                                                                                                                                                                                                           |
| 258 | [babephysical_swf]<br>Show the field ONLY if:<br>[dispbb_neo][current-instance] != '3' and [admitdisposition_neo][current-instance] != '1' | Check this box if this is a physical (in-person) follow-up                                                                                                         | checkbox<br>1 babephysical_swf__1                                                                                                                                                                                                                                                     |
| 259 | [babealive_swf]<br>Show the field ONLY if:<br>[dispbb_neo][current-instance] != '3' and [admitdisposition_neo][current-instance] != '1'    | Section Header: <i>Vital Status</i><br>Is the newborn alive at the time of follow-up interview?                                                                    | yesno<br>1 Yes<br>0 No                                                                                                                                                                                                                                                                |
| 260 | [babedeathdate_swf]<br>Show the field ONLY if:<br>[babealive_swf] = '0'                                                                    | On what date did the baby die?                                                                                                                                     | text (date_dmy)                                                                                                                                                                                                                                                                       |
| 261 | [babedeathplace_swf]<br>Show the field ONLY if:<br>[babealive_swf] = '0'                                                                   | Where did the baby die?                                                                                                                                            | dropdown<br>1 Home<br>2 Hospital<br>3 on the way to hospital<br>98 Other                                                                                                                                                                                                              |
| 262 | [babedeathplaceother_swf]<br>Show the field ONLY if:<br>[babedeathplace_swf] = '98'                                                        | Specify other                                                                                                                                                      | text                                                                                                                                                                                                                                                                                  |
| 263 | [babeadmit_swf]<br>Show the field ONLY if:<br>[babealive_swf] = '1'                                                                        | Section Header: <i>Health seeking/readmissions</i><br>Was the newborn admitted for one or more nights at a facility for any reason after being home post-delivery? | yesno<br>1 Yes<br>0 No                                                                                                                                                                                                                                                                |
| 264 | [numbabeadmit_swf]<br>Show the field ONLY if:<br>[babeadmit_swf] = '1'                                                                     | How many times was the baby admitted in the first 6 weeks after birth                                                                                              | dropdown<br>1 1<br>2 2<br>3 3<br>4 >3                                                                                                                                                                                                                                                 |
| 265 | [babeadmitage_swf]<br>Show the field ONLY if:<br>[babeadmit_swf] = '1'                                                                     | How many days old was the baby during the first admission?                                                                                                         | text (integer, Min: 1, Max: 42)                                                                                                                                                                                                                                                       |
| 266 | [babenightsadm_swf]<br>Show the field ONLY if:<br>[babeadmit_swf] = '1'                                                                    | For how many nights were they admitted?                                                                                                                            | text (integer, Min: 1)                                                                                                                                                                                                                                                                |
| 267 | [babeadmitpathway_swf]<br>Show the field ONLY if:<br>[babeadmit_swf] = '1'                                                                 | What was the care-seeking pathway to this admission?                                                                                                               | checkbox<br>1 babeadmitpathway_swf__1 Routine well-baby visit identified problem<br>2 babeadmitpathway_swf__2 Self referral due to parental concern<br>3 babeadmitpathway_swf__3 Both self-referral and well-baby visit resulted in care seeking<br>98 babeadmitpathway_swf__98 Other |



|     |                                                                                            |                                                                                          |                                                                                                                                                                                                                                                                                                                                                                                                                                                                                                                                                                                                                                                                                                                                                                                                                                                                                                                                                                                                                                                                                                                                                                                                                                                                                                                                                                                                                                                                                                                                                                                                                                                                                  |   |                      |               |    |                      |                      |   |                      |              |   |                      |                       |   |                      |               |   |                      |                  |   |                      |                                            |   |                      |                       |   |                      |                        |    |                       |                              |    |                       |                |    |                       |                     |    |                       |      |    |                       |              |    |                       |                               |    |                       |       |    |                       |                                                |    |                       |                    |    |                       |       |    |                       |      |
|-----|--------------------------------------------------------------------------------------------|------------------------------------------------------------------------------------------|----------------------------------------------------------------------------------------------------------------------------------------------------------------------------------------------------------------------------------------------------------------------------------------------------------------------------------------------------------------------------------------------------------------------------------------------------------------------------------------------------------------------------------------------------------------------------------------------------------------------------------------------------------------------------------------------------------------------------------------------------------------------------------------------------------------------------------------------------------------------------------------------------------------------------------------------------------------------------------------------------------------------------------------------------------------------------------------------------------------------------------------------------------------------------------------------------------------------------------------------------------------------------------------------------------------------------------------------------------------------------------------------------------------------------------------------------------------------------------------------------------------------------------------------------------------------------------------------------------------------------------------------------------------------------------|---|----------------------|---------------|----|----------------------|----------------------|---|----------------------|--------------|---|----------------------|-----------------------|---|----------------------|---------------|---|----------------------|------------------|---|----------------------|--------------------------------------------|---|----------------------|-----------------------|---|----------------------|------------------------|----|-----------------------|------------------------------|----|-----------------------|----------------|----|-----------------------|---------------------|----|-----------------------|------|----|-----------------------|--------------|----|-----------------------|-------------------------------|----|-----------------------|-------|----|-----------------------|------------------------------------------------|----|-----------------------|--------------------|----|-----------------------|-------|----|-----------------------|------|
| 268 | [babeadmitpathwayother_swf]<br>Show the field ONLY if:<br>[babeadmitpathway_swf(98)] = '1' | Other pathway:                                                                           | text                                                                                                                                                                                                                                                                                                                                                                                                                                                                                                                                                                                                                                                                                                                                                                                                                                                                                                                                                                                                                                                                                                                                                                                                                                                                                                                                                                                                                                                                                                                                                                                                                                                                             |   |                      |               |    |                      |                      |   |                      |              |   |                      |                       |   |                      |               |   |                      |                  |   |                      |                                            |   |                      |                       |   |                      |                        |    |                       |                              |    |                       |                |    |                       |                     |    |                       |      |    |                       |              |    |                       |                               |    |                       |       |    |                       |                                                |    |                       |                    |    |                       |       |    |                       |      |
| 269 | [babeadmitsymp_swf]<br>Show the field ONLY if:<br>[babeadmit_swf] = '1'                    | What were the symptoms the child experienced during this illness (check all that apply)? | checkbox<br><table border="1" data-bbox="1031 281 1508 1274"> <tr><td>1</td><td>babeadmitsymp_swf__1</td><td>Skin pustules</td></tr> <tr><td>2</td><td>babeadmitsymp_swf__2</td><td>Respiratory distress</td></tr> <tr><td>3</td><td>babeadmitsymp_swf__3</td><td>Watery stool</td></tr> <tr><td>4</td><td>babeadmitsymp_swf__4</td><td>Fever/hotness of body</td></tr> <tr><td>5</td><td>babeadmitsymp_swf__5</td><td>Bilious vomit</td></tr> <tr><td>6</td><td>babeadmitsymp_swf__6</td><td>projectile vomit</td></tr> <tr><td>7</td><td>babeadmitsymp_swf__7</td><td>Not waking up to feed or abnormally sleepy</td></tr> <tr><td>8</td><td>babeadmitsymp_swf__8</td><td>Swelling of both feet</td></tr> <tr><td>9</td><td>babeadmitsymp_swf__9</td><td>Changes in urine color</td></tr> <tr><td>10</td><td>babeadmitsymp_swf__10</td><td>Making less urine than usual</td></tr> <tr><td>11</td><td>babeadmitsymp_swf__11</td><td>Blood in stool</td></tr> <tr><td>12</td><td>babeadmitsymp_swf__12</td><td>Seizure/convulsions</td></tr> <tr><td>13</td><td>babeadmitsymp_swf__13</td><td>Coma</td></tr> <tr><td>14</td><td>babeadmitsymp_swf__14</td><td>Yellow soles</td></tr> <tr><td>15</td><td>babeadmitsymp_swf__15</td><td>Difficulty with breastfeeding</td></tr> <tr><td>16</td><td>babeadmitsymp_swf__16</td><td>Cough</td></tr> <tr><td>17</td><td>babeadmitsymp_swf__17</td><td>Umbilical cord problem (pain, discharge, etc.)</td></tr> <tr><td>18</td><td>babeadmitsymp_swf__18</td><td>Not gaining weight</td></tr> <tr><td>98</td><td>babeadmitsymp_swf__98</td><td>Other</td></tr> <tr><td>99</td><td>babeadmitsymp_swf__99</td><td>None</td></tr> </table> | 1 | babeadmitsymp_swf__1 | Skin pustules | 2  | babeadmitsymp_swf__2 | Respiratory distress | 3 | babeadmitsymp_swf__3 | Watery stool | 4 | babeadmitsymp_swf__4 | Fever/hotness of body | 5 | babeadmitsymp_swf__5 | Bilious vomit | 6 | babeadmitsymp_swf__6 | projectile vomit | 7 | babeadmitsymp_swf__7 | Not waking up to feed or abnormally sleepy | 8 | babeadmitsymp_swf__8 | Swelling of both feet | 9 | babeadmitsymp_swf__9 | Changes in urine color | 10 | babeadmitsymp_swf__10 | Making less urine than usual | 11 | babeadmitsymp_swf__11 | Blood in stool | 12 | babeadmitsymp_swf__12 | Seizure/convulsions | 13 | babeadmitsymp_swf__13 | Coma | 14 | babeadmitsymp_swf__14 | Yellow soles | 15 | babeadmitsymp_swf__15 | Difficulty with breastfeeding | 16 | babeadmitsymp_swf__16 | Cough | 17 | babeadmitsymp_swf__17 | Umbilical cord problem (pain, discharge, etc.) | 18 | babeadmitsymp_swf__18 | Not gaining weight | 98 | babeadmitsymp_swf__98 | Other | 99 | babeadmitsymp_swf__99 | None |
| 1   | babeadmitsymp_swf__1                                                                       | Skin pustules                                                                            |                                                                                                                                                                                                                                                                                                                                                                                                                                                                                                                                                                                                                                                                                                                                                                                                                                                                                                                                                                                                                                                                                                                                                                                                                                                                                                                                                                                                                                                                                                                                                                                                                                                                                  |   |                      |               |    |                      |                      |   |                      |              |   |                      |                       |   |                      |               |   |                      |                  |   |                      |                                            |   |                      |                       |   |                      |                        |    |                       |                              |    |                       |                |    |                       |                     |    |                       |      |    |                       |              |    |                       |                               |    |                       |       |    |                       |                                                |    |                       |                    |    |                       |       |    |                       |      |
| 2   | babeadmitsymp_swf__2                                                                       | Respiratory distress                                                                     |                                                                                                                                                                                                                                                                                                                                                                                                                                                                                                                                                                                                                                                                                                                                                                                                                                                                                                                                                                                                                                                                                                                                                                                                                                                                                                                                                                                                                                                                                                                                                                                                                                                                                  |   |                      |               |    |                      |                      |   |                      |              |   |                      |                       |   |                      |               |   |                      |                  |   |                      |                                            |   |                      |                       |   |                      |                        |    |                       |                              |    |                       |                |    |                       |                     |    |                       |      |    |                       |              |    |                       |                               |    |                       |       |    |                       |                                                |    |                       |                    |    |                       |       |    |                       |      |
| 3   | babeadmitsymp_swf__3                                                                       | Watery stool                                                                             |                                                                                                                                                                                                                                                                                                                                                                                                                                                                                                                                                                                                                                                                                                                                                                                                                                                                                                                                                                                                                                                                                                                                                                                                                                                                                                                                                                                                                                                                                                                                                                                                                                                                                  |   |                      |               |    |                      |                      |   |                      |              |   |                      |                       |   |                      |               |   |                      |                  |   |                      |                                            |   |                      |                       |   |                      |                        |    |                       |                              |    |                       |                |    |                       |                     |    |                       |      |    |                       |              |    |                       |                               |    |                       |       |    |                       |                                                |    |                       |                    |    |                       |       |    |                       |      |
| 4   | babeadmitsymp_swf__4                                                                       | Fever/hotness of body                                                                    |                                                                                                                                                                                                                                                                                                                                                                                                                                                                                                                                                                                                                                                                                                                                                                                                                                                                                                                                                                                                                                                                                                                                                                                                                                                                                                                                                                                                                                                                                                                                                                                                                                                                                  |   |                      |               |    |                      |                      |   |                      |              |   |                      |                       |   |                      |               |   |                      |                  |   |                      |                                            |   |                      |                       |   |                      |                        |    |                       |                              |    |                       |                |    |                       |                     |    |                       |      |    |                       |              |    |                       |                               |    |                       |       |    |                       |                                                |    |                       |                    |    |                       |       |    |                       |      |
| 5   | babeadmitsymp_swf__5                                                                       | Bilious vomit                                                                            |                                                                                                                                                                                                                                                                                                                                                                                                                                                                                                                                                                                                                                                                                                                                                                                                                                                                                                                                                                                                                                                                                                                                                                                                                                                                                                                                                                                                                                                                                                                                                                                                                                                                                  |   |                      |               |    |                      |                      |   |                      |              |   |                      |                       |   |                      |               |   |                      |                  |   |                      |                                            |   |                      |                       |   |                      |                        |    |                       |                              |    |                       |                |    |                       |                     |    |                       |      |    |                       |              |    |                       |                               |    |                       |       |    |                       |                                                |    |                       |                    |    |                       |       |    |                       |      |
| 6   | babeadmitsymp_swf__6                                                                       | projectile vomit                                                                         |                                                                                                                                                                                                                                                                                                                                                                                                                                                                                                                                                                                                                                                                                                                                                                                                                                                                                                                                                                                                                                                                                                                                                                                                                                                                                                                                                                                                                                                                                                                                                                                                                                                                                  |   |                      |               |    |                      |                      |   |                      |              |   |                      |                       |   |                      |               |   |                      |                  |   |                      |                                            |   |                      |                       |   |                      |                        |    |                       |                              |    |                       |                |    |                       |                     |    |                       |      |    |                       |              |    |                       |                               |    |                       |       |    |                       |                                                |    |                       |                    |    |                       |       |    |                       |      |
| 7   | babeadmitsymp_swf__7                                                                       | Not waking up to feed or abnormally sleepy                                               |                                                                                                                                                                                                                                                                                                                                                                                                                                                                                                                                                                                                                                                                                                                                                                                                                                                                                                                                                                                                                                                                                                                                                                                                                                                                                                                                                                                                                                                                                                                                                                                                                                                                                  |   |                      |               |    |                      |                      |   |                      |              |   |                      |                       |   |                      |               |   |                      |                  |   |                      |                                            |   |                      |                       |   |                      |                        |    |                       |                              |    |                       |                |    |                       |                     |    |                       |      |    |                       |              |    |                       |                               |    |                       |       |    |                       |                                                |    |                       |                    |    |                       |       |    |                       |      |
| 8   | babeadmitsymp_swf__8                                                                       | Swelling of both feet                                                                    |                                                                                                                                                                                                                                                                                                                                                                                                                                                                                                                                                                                                                                                                                                                                                                                                                                                                                                                                                                                                                                                                                                                                                                                                                                                                                                                                                                                                                                                                                                                                                                                                                                                                                  |   |                      |               |    |                      |                      |   |                      |              |   |                      |                       |   |                      |               |   |                      |                  |   |                      |                                            |   |                      |                       |   |                      |                        |    |                       |                              |    |                       |                |    |                       |                     |    |                       |      |    |                       |              |    |                       |                               |    |                       |       |    |                       |                                                |    |                       |                    |    |                       |       |    |                       |      |
| 9   | babeadmitsymp_swf__9                                                                       | Changes in urine color                                                                   |                                                                                                                                                                                                                                                                                                                                                                                                                                                                                                                                                                                                                                                                                                                                                                                                                                                                                                                                                                                                                                                                                                                                                                                                                                                                                                                                                                                                                                                                                                                                                                                                                                                                                  |   |                      |               |    |                      |                      |   |                      |              |   |                      |                       |   |                      |               |   |                      |                  |   |                      |                                            |   |                      |                       |   |                      |                        |    |                       |                              |    |                       |                |    |                       |                     |    |                       |      |    |                       |              |    |                       |                               |    |                       |       |    |                       |                                                |    |                       |                    |    |                       |       |    |                       |      |
| 10  | babeadmitsymp_swf__10                                                                      | Making less urine than usual                                                             |                                                                                                                                                                                                                                                                                                                                                                                                                                                                                                                                                                                                                                                                                                                                                                                                                                                                                                                                                                                                                                                                                                                                                                                                                                                                                                                                                                                                                                                                                                                                                                                                                                                                                  |   |                      |               |    |                      |                      |   |                      |              |   |                      |                       |   |                      |               |   |                      |                  |   |                      |                                            |   |                      |                       |   |                      |                        |    |                       |                              |    |                       |                |    |                       |                     |    |                       |      |    |                       |              |    |                       |                               |    |                       |       |    |                       |                                                |    |                       |                    |    |                       |       |    |                       |      |
| 11  | babeadmitsymp_swf__11                                                                      | Blood in stool                                                                           |                                                                                                                                                                                                                                                                                                                                                                                                                                                                                                                                                                                                                                                                                                                                                                                                                                                                                                                                                                                                                                                                                                                                                                                                                                                                                                                                                                                                                                                                                                                                                                                                                                                                                  |   |                      |               |    |                      |                      |   |                      |              |   |                      |                       |   |                      |               |   |                      |                  |   |                      |                                            |   |                      |                       |   |                      |                        |    |                       |                              |    |                       |                |    |                       |                     |    |                       |      |    |                       |              |    |                       |                               |    |                       |       |    |                       |                                                |    |                       |                    |    |                       |       |    |                       |      |
| 12  | babeadmitsymp_swf__12                                                                      | Seizure/convulsions                                                                      |                                                                                                                                                                                                                                                                                                                                                                                                                                                                                                                                                                                                                                                                                                                                                                                                                                                                                                                                                                                                                                                                                                                                                                                                                                                                                                                                                                                                                                                                                                                                                                                                                                                                                  |   |                      |               |    |                      |                      |   |                      |              |   |                      |                       |   |                      |               |   |                      |                  |   |                      |                                            |   |                      |                       |   |                      |                        |    |                       |                              |    |                       |                |    |                       |                     |    |                       |      |    |                       |              |    |                       |                               |    |                       |       |    |                       |                                                |    |                       |                    |    |                       |       |    |                       |      |
| 13  | babeadmitsymp_swf__13                                                                      | Coma                                                                                     |                                                                                                                                                                                                                                                                                                                                                                                                                                                                                                                                                                                                                                                                                                                                                                                                                                                                                                                                                                                                                                                                                                                                                                                                                                                                                                                                                                                                                                                                                                                                                                                                                                                                                  |   |                      |               |    |                      |                      |   |                      |              |   |                      |                       |   |                      |               |   |                      |                  |   |                      |                                            |   |                      |                       |   |                      |                        |    |                       |                              |    |                       |                |    |                       |                     |    |                       |      |    |                       |              |    |                       |                               |    |                       |       |    |                       |                                                |    |                       |                    |    |                       |       |    |                       |      |
| 14  | babeadmitsymp_swf__14                                                                      | Yellow soles                                                                             |                                                                                                                                                                                                                                                                                                                                                                                                                                                                                                                                                                                                                                                                                                                                                                                                                                                                                                                                                                                                                                                                                                                                                                                                                                                                                                                                                                                                                                                                                                                                                                                                                                                                                  |   |                      |               |    |                      |                      |   |                      |              |   |                      |                       |   |                      |               |   |                      |                  |   |                      |                                            |   |                      |                       |   |                      |                        |    |                       |                              |    |                       |                |    |                       |                     |    |                       |      |    |                       |              |    |                       |                               |    |                       |       |    |                       |                                                |    |                       |                    |    |                       |       |    |                       |      |
| 15  | babeadmitsymp_swf__15                                                                      | Difficulty with breastfeeding                                                            |                                                                                                                                                                                                                                                                                                                                                                                                                                                                                                                                                                                                                                                                                                                                                                                                                                                                                                                                                                                                                                                                                                                                                                                                                                                                                                                                                                                                                                                                                                                                                                                                                                                                                  |   |                      |               |    |                      |                      |   |                      |              |   |                      |                       |   |                      |               |   |                      |                  |   |                      |                                            |   |                      |                       |   |                      |                        |    |                       |                              |    |                       |                |    |                       |                     |    |                       |      |    |                       |              |    |                       |                               |    |                       |       |    |                       |                                                |    |                       |                    |    |                       |       |    |                       |      |
| 16  | babeadmitsymp_swf__16                                                                      | Cough                                                                                    |                                                                                                                                                                                                                                                                                                                                                                                                                                                                                                                                                                                                                                                                                                                                                                                                                                                                                                                                                                                                                                                                                                                                                                                                                                                                                                                                                                                                                                                                                                                                                                                                                                                                                  |   |                      |               |    |                      |                      |   |                      |              |   |                      |                       |   |                      |               |   |                      |                  |   |                      |                                            |   |                      |                       |   |                      |                        |    |                       |                              |    |                       |                |    |                       |                     |    |                       |      |    |                       |              |    |                       |                               |    |                       |       |    |                       |                                                |    |                       |                    |    |                       |       |    |                       |      |
| 17  | babeadmitsymp_swf__17                                                                      | Umbilical cord problem (pain, discharge, etc.)                                           |                                                                                                                                                                                                                                                                                                                                                                                                                                                                                                                                                                                                                                                                                                                                                                                                                                                                                                                                                                                                                                                                                                                                                                                                                                                                                                                                                                                                                                                                                                                                                                                                                                                                                  |   |                      |               |    |                      |                      |   |                      |              |   |                      |                       |   |                      |               |   |                      |                  |   |                      |                                            |   |                      |                       |   |                      |                        |    |                       |                              |    |                       |                |    |                       |                     |    |                       |      |    |                       |              |    |                       |                               |    |                       |       |    |                       |                                                |    |                       |                    |    |                       |       |    |                       |      |
| 18  | babeadmitsymp_swf__18                                                                      | Not gaining weight                                                                       |                                                                                                                                                                                                                                                                                                                                                                                                                                                                                                                                                                                                                                                                                                                                                                                                                                                                                                                                                                                                                                                                                                                                                                                                                                                                                                                                                                                                                                                                                                                                                                                                                                                                                  |   |                      |               |    |                      |                      |   |                      |              |   |                      |                       |   |                      |               |   |                      |                  |   |                      |                                            |   |                      |                       |   |                      |                        |    |                       |                              |    |                       |                |    |                       |                     |    |                       |      |    |                       |              |    |                       |                               |    |                       |       |    |                       |                                                |    |                       |                    |    |                       |       |    |                       |      |
| 98  | babeadmitsymp_swf__98                                                                      | Other                                                                                    |                                                                                                                                                                                                                                                                                                                                                                                                                                                                                                                                                                                                                                                                                                                                                                                                                                                                                                                                                                                                                                                                                                                                                                                                                                                                                                                                                                                                                                                                                                                                                                                                                                                                                  |   |                      |               |    |                      |                      |   |                      |              |   |                      |                       |   |                      |               |   |                      |                  |   |                      |                                            |   |                      |                       |   |                      |                        |    |                       |                              |    |                       |                |    |                       |                     |    |                       |      |    |                       |              |    |                       |                               |    |                       |       |    |                       |                                                |    |                       |                    |    |                       |       |    |                       |      |
| 99  | babeadmitsymp_swf__99                                                                      | None                                                                                     |                                                                                                                                                                                                                                                                                                                                                                                                                                                                                                                                                                                                                                                                                                                                                                                                                                                                                                                                                                                                                                                                                                                                                                                                                                                                                                                                                                                                                                                                                                                                                                                                                                                                                  |   |                      |               |    |                      |                      |   |                      |              |   |                      |                       |   |                      |               |   |                      |                  |   |                      |                                            |   |                      |                       |   |                      |                        |    |                       |                              |    |                       |                |    |                       |                     |    |                       |      |    |                       |              |    |                       |                               |    |                       |       |    |                       |                                                |    |                       |                    |    |                       |       |    |                       |      |
| 270 | [babeadmitsympother_swf]<br>Show the field ONLY if:<br>[babeadmitsymp_swf(98)] = '1'       | Other symptom:                                                                           | text                                                                                                                                                                                                                                                                                                                                                                                                                                                                                                                                                                                                                                                                                                                                                                                                                                                                                                                                                                                                                                                                                                                                                                                                                                                                                                                                                                                                                                                                                                                                                                                                                                                                             |   |                      |               |    |                      |                      |   |                      |              |   |                      |                       |   |                      |               |   |                      |                  |   |                      |                                            |   |                      |                       |   |                      |                        |    |                       |                              |    |                       |                |    |                       |                     |    |                       |      |    |                       |              |    |                       |                               |    |                       |       |    |                       |                                                |    |                       |                    |    |                       |       |    |                       |      |
| 271 | [transfusion_swf]<br>Show the field ONLY if:<br>[babeadmit_swf] = '1'                      | Was baby transfused during any admission post-discharge                                  | yesno<br><table border="1" data-bbox="1031 1451 1105 1520"> <tr><td>1</td><td>Yes</td></tr> <tr><td>0</td><td>No</td></tr> </table>                                                                                                                                                                                                                                                                                                                                                                                                                                                                                                                                                                                                                                                                                                                                                                                                                                                                                                                                                                                                                                                                                                                                                                                                                                                                                                                                                                                                                                                                                                                                              | 1 | Yes                  | 0             | No |                      |                      |   |                      |              |   |                      |                       |   |                      |               |   |                      |                  |   |                      |                                            |   |                      |                       |   |                      |                        |    |                       |                              |    |                       |                |    |                       |                     |    |                       |      |    |                       |              |    |                       |                               |    |                       |       |    |                       |                                                |    |                       |                    |    |                       |       |    |                       |      |
| 1   | Yes                                                                                        |                                                                                          |                                                                                                                                                                                                                                                                                                                                                                                                                                                                                                                                                                                                                                                                                                                                                                                                                                                                                                                                                                                                                                                                                                                                                                                                                                                                                                                                                                                                                                                                                                                                                                                                                                                                                  |   |                      |               |    |                      |                      |   |                      |              |   |                      |                       |   |                      |               |   |                      |                  |   |                      |                                            |   |                      |                       |   |                      |                        |    |                       |                              |    |                       |                |    |                       |                     |    |                       |      |    |                       |              |    |                       |                               |    |                       |       |    |                       |                                                |    |                       |                    |    |                       |       |    |                       |      |
| 0   | No                                                                                         |                                                                                          |                                                                                                                                                                                                                                                                                                                                                                                                                                                                                                                                                                                                                                                                                                                                                                                                                                                                                                                                                                                                                                                                                                                                                                                                                                                                                                                                                                                                                                                                                                                                                                                                                                                                                  |   |                      |               |    |                      |                      |   |                      |              |   |                      |                       |   |                      |               |   |                      |                  |   |                      |                                            |   |                      |                       |   |                      |                        |    |                       |                              |    |                       |                |    |                       |                     |    |                       |      |    |                       |              |    |                       |                               |    |                       |       |    |                       |                                                |    |                       |                    |    |                       |       |    |                       |      |

|     |                                                                                                                                         |                                                                                                                                                                                                                      |                                                                                                                                                                                                                                                                                                                                                                                                                                                                                                                                                                                                                                                                                                                                                                                                                                                                                                                                                                                                                                                                   |   |                        |                                            |    |                        |                                       |   |                        |                                                                 |    |                         |                        |   |                      |                              |   |                      |                   |   |                      |                |   |                      |     |   |                      |             |    |                       |        |    |                       |             |    |                       |       |    |                       |      |
|-----|-----------------------------------------------------------------------------------------------------------------------------------------|----------------------------------------------------------------------------------------------------------------------------------------------------------------------------------------------------------------------|-------------------------------------------------------------------------------------------------------------------------------------------------------------------------------------------------------------------------------------------------------------------------------------------------------------------------------------------------------------------------------------------------------------------------------------------------------------------------------------------------------------------------------------------------------------------------------------------------------------------------------------------------------------------------------------------------------------------------------------------------------------------------------------------------------------------------------------------------------------------------------------------------------------------------------------------------------------------------------------------------------------------------------------------------------------------|---|------------------------|--------------------------------------------|----|------------------------|---------------------------------------|---|------------------------|-----------------------------------------------------------------|----|-------------------------|------------------------|---|----------------------|------------------------------|---|----------------------|-------------------|---|----------------------|----------------|---|----------------------|-----|---|----------------------|-------------|----|-----------------------|--------|----|-----------------------|-------------|----|-----------------------|-------|----|-----------------------|------|
| 272 | [babeadmitcond_swf]<br>Show the field ONLY if:<br>[babeadmit_swf] = '1'                                                                 | Were you told the child had any of the following conditions?                                                                                                                                                         | checkbox<br><table border="1"> <tr> <td>1</td> <td>babeadmitcond_swf__1</td> <td>Sepsis</td> </tr> <tr> <td>2</td> <td>babeadmitcond_swf__2</td> <td>Respiratory illness</td> </tr> <tr> <td>3</td> <td>babeadmitcond_swf__3</td> <td>Oncologic disease (cancer)</td> </tr> <tr> <td>4</td> <td>babeadmitcond_swf__4</td> <td>Congenital abnormality</td> </tr> <tr> <td>5</td> <td>babeadmitcond_swf__5</td> <td>Endocrine/ metabolic disease</td> </tr> <tr> <td>6</td> <td>babeadmitcond_swf__6</td> <td>Failure to thrive</td> </tr> <tr> <td>7</td> <td>babeadmitcond_swf__7</td> <td>Trauma/ injury</td> </tr> <tr> <td>8</td> <td>babeadmitcond_swf__8</td> <td>HIV</td> </tr> <tr> <td>9</td> <td>babeadmitcond_swf__9</td> <td>Sickle Cell</td> </tr> <tr> <td>10</td> <td>babeadmitcond_swf__10</td> <td>Anemia</td> </tr> <tr> <td>11</td> <td>babeadmitcond_swf__11</td> <td>Dehydration</td> </tr> <tr> <td>98</td> <td>babeadmitcond_swf__98</td> <td>Other</td> </tr> <tr> <td>99</td> <td>babeadmitcond_swf__99</td> <td>None</td> </tr> </table> | 1 | babeadmitcond_swf__1   | Sepsis                                     | 2  | babeadmitcond_swf__2   | Respiratory illness                   | 3 | babeadmitcond_swf__3   | Oncologic disease (cancer)                                      | 4  | babeadmitcond_swf__4    | Congenital abnormality | 5 | babeadmitcond_swf__5 | Endocrine/ metabolic disease | 6 | babeadmitcond_swf__6 | Failure to thrive | 7 | babeadmitcond_swf__7 | Trauma/ injury | 8 | babeadmitcond_swf__8 | HIV | 9 | babeadmitcond_swf__9 | Sickle Cell | 10 | babeadmitcond_swf__10 | Anemia | 11 | babeadmitcond_swf__11 | Dehydration | 98 | babeadmitcond_swf__98 | Other | 99 | babeadmitcond_swf__99 | None |
| 1   | babeadmitcond_swf__1                                                                                                                    | Sepsis                                                                                                                                                                                                               |                                                                                                                                                                                                                                                                                                                                                                                                                                                                                                                                                                                                                                                                                                                                                                                                                                                                                                                                                                                                                                                                   |   |                        |                                            |    |                        |                                       |   |                        |                                                                 |    |                         |                        |   |                      |                              |   |                      |                   |   |                      |                |   |                      |     |   |                      |             |    |                       |        |    |                       |             |    |                       |       |    |                       |      |
| 2   | babeadmitcond_swf__2                                                                                                                    | Respiratory illness                                                                                                                                                                                                  |                                                                                                                                                                                                                                                                                                                                                                                                                                                                                                                                                                                                                                                                                                                                                                                                                                                                                                                                                                                                                                                                   |   |                        |                                            |    |                        |                                       |   |                        |                                                                 |    |                         |                        |   |                      |                              |   |                      |                   |   |                      |                |   |                      |     |   |                      |             |    |                       |        |    |                       |             |    |                       |       |    |                       |      |
| 3   | babeadmitcond_swf__3                                                                                                                    | Oncologic disease (cancer)                                                                                                                                                                                           |                                                                                                                                                                                                                                                                                                                                                                                                                                                                                                                                                                                                                                                                                                                                                                                                                                                                                                                                                                                                                                                                   |   |                        |                                            |    |                        |                                       |   |                        |                                                                 |    |                         |                        |   |                      |                              |   |                      |                   |   |                      |                |   |                      |     |   |                      |             |    |                       |        |    |                       |             |    |                       |       |    |                       |      |
| 4   | babeadmitcond_swf__4                                                                                                                    | Congenital abnormality                                                                                                                                                                                               |                                                                                                                                                                                                                                                                                                                                                                                                                                                                                                                                                                                                                                                                                                                                                                                                                                                                                                                                                                                                                                                                   |   |                        |                                            |    |                        |                                       |   |                        |                                                                 |    |                         |                        |   |                      |                              |   |                      |                   |   |                      |                |   |                      |     |   |                      |             |    |                       |        |    |                       |             |    |                       |       |    |                       |      |
| 5   | babeadmitcond_swf__5                                                                                                                    | Endocrine/ metabolic disease                                                                                                                                                                                         |                                                                                                                                                                                                                                                                                                                                                                                                                                                                                                                                                                                                                                                                                                                                                                                                                                                                                                                                                                                                                                                                   |   |                        |                                            |    |                        |                                       |   |                        |                                                                 |    |                         |                        |   |                      |                              |   |                      |                   |   |                      |                |   |                      |     |   |                      |             |    |                       |        |    |                       |             |    |                       |       |    |                       |      |
| 6   | babeadmitcond_swf__6                                                                                                                    | Failure to thrive                                                                                                                                                                                                    |                                                                                                                                                                                                                                                                                                                                                                                                                                                                                                                                                                                                                                                                                                                                                                                                                                                                                                                                                                                                                                                                   |   |                        |                                            |    |                        |                                       |   |                        |                                                                 |    |                         |                        |   |                      |                              |   |                      |                   |   |                      |                |   |                      |     |   |                      |             |    |                       |        |    |                       |             |    |                       |       |    |                       |      |
| 7   | babeadmitcond_swf__7                                                                                                                    | Trauma/ injury                                                                                                                                                                                                       |                                                                                                                                                                                                                                                                                                                                                                                                                                                                                                                                                                                                                                                                                                                                                                                                                                                                                                                                                                                                                                                                   |   |                        |                                            |    |                        |                                       |   |                        |                                                                 |    |                         |                        |   |                      |                              |   |                      |                   |   |                      |                |   |                      |     |   |                      |             |    |                       |        |    |                       |             |    |                       |       |    |                       |      |
| 8   | babeadmitcond_swf__8                                                                                                                    | HIV                                                                                                                                                                                                                  |                                                                                                                                                                                                                                                                                                                                                                                                                                                                                                                                                                                                                                                                                                                                                                                                                                                                                                                                                                                                                                                                   |   |                        |                                            |    |                        |                                       |   |                        |                                                                 |    |                         |                        |   |                      |                              |   |                      |                   |   |                      |                |   |                      |     |   |                      |             |    |                       |        |    |                       |             |    |                       |       |    |                       |      |
| 9   | babeadmitcond_swf__9                                                                                                                    | Sickle Cell                                                                                                                                                                                                          |                                                                                                                                                                                                                                                                                                                                                                                                                                                                                                                                                                                                                                                                                                                                                                                                                                                                                                                                                                                                                                                                   |   |                        |                                            |    |                        |                                       |   |                        |                                                                 |    |                         |                        |   |                      |                              |   |                      |                   |   |                      |                |   |                      |     |   |                      |             |    |                       |        |    |                       |             |    |                       |       |    |                       |      |
| 10  | babeadmitcond_swf__10                                                                                                                   | Anemia                                                                                                                                                                                                               |                                                                                                                                                                                                                                                                                                                                                                                                                                                                                                                                                                                                                                                                                                                                                                                                                                                                                                                                                                                                                                                                   |   |                        |                                            |    |                        |                                       |   |                        |                                                                 |    |                         |                        |   |                      |                              |   |                      |                   |   |                      |                |   |                      |     |   |                      |             |    |                       |        |    |                       |             |    |                       |       |    |                       |      |
| 11  | babeadmitcond_swf__11                                                                                                                   | Dehydration                                                                                                                                                                                                          |                                                                                                                                                                                                                                                                                                                                                                                                                                                                                                                                                                                                                                                                                                                                                                                                                                                                                                                                                                                                                                                                   |   |                        |                                            |    |                        |                                       |   |                        |                                                                 |    |                         |                        |   |                      |                              |   |                      |                   |   |                      |                |   |                      |     |   |                      |             |    |                       |        |    |                       |             |    |                       |       |    |                       |      |
| 98  | babeadmitcond_swf__98                                                                                                                   | Other                                                                                                                                                                                                                |                                                                                                                                                                                                                                                                                                                                                                                                                                                                                                                                                                                                                                                                                                                                                                                                                                                                                                                                                                                                                                                                   |   |                        |                                            |    |                        |                                       |   |                        |                                                                 |    |                         |                        |   |                      |                              |   |                      |                   |   |                      |                |   |                      |     |   |                      |             |    |                       |        |    |                       |             |    |                       |       |    |                       |      |
| 99  | babeadmitcond_swf__99                                                                                                                   | None                                                                                                                                                                                                                 |                                                                                                                                                                                                                                                                                                                                                                                                                                                                                                                                                                                                                                                                                                                                                                                                                                                                                                                                                                                                                                                                   |   |                        |                                            |    |                        |                                       |   |                        |                                                                 |    |                         |                        |   |                      |                              |   |                      |                   |   |                      |                |   |                      |     |   |                      |             |    |                       |        |    |                       |             |    |                       |       |    |                       |      |
| 273 | [babeadmitcondother_swf]<br>Show the field ONLY if:<br>[babeadmitcond_swf(98)] = '1'                                                    | Other condition:                                                                                                                                                                                                     | text                                                                                                                                                                                                                                                                                                                                                                                                                                                                                                                                                                                                                                                                                                                                                                                                                                                                                                                                                                                                                                                              |   |                        |                                            |    |                        |                                       |   |                        |                                                                 |    |                         |                        |   |                      |                              |   |                      |                   |   |                      |                |   |                      |     |   |                      |             |    |                       |        |    |                       |             |    |                       |       |    |                       |      |
| 274 | [matsymp_babeoutcome]<br>Show the field ONLY if:<br>[babeadmit_swf]=1                                                                   | Was the mother experiencing any significant illness at the time when baby was admitted?                                                                                                                              | yesno<br><table border="1"> <tr> <td>1</td> <td>Yes</td> </tr> <tr> <td>0</td> <td>No</td> </tr> </table>                                                                                                                                                                                                                                                                                                                                                                                                                                                                                                                                                                                                                                                                                                                                                                                                                                                                                                                                                         | 1 | Yes                    | 0                                          | No |                        |                                       |   |                        |                                                                 |    |                         |                        |   |                      |                              |   |                      |                   |   |                      |                |   |                      |     |   |                      |             |    |                       |        |    |                       |             |    |                       |       |    |                       |      |
| 1   | Yes                                                                                                                                     |                                                                                                                                                                                                                      |                                                                                                                                                                                                                                                                                                                                                                                                                                                                                                                                                                                                                                                                                                                                                                                                                                                                                                                                                                                                                                                                   |   |                        |                                            |    |                        |                                       |   |                        |                                                                 |    |                         |                        |   |                      |                              |   |                      |                   |   |                      |                |   |                      |     |   |                      |             |    |                       |        |    |                       |             |    |                       |       |    |                       |      |
| 0   | No                                                                                                                                      |                                                                                                                                                                                                                      |                                                                                                                                                                                                                                                                                                                                                                                                                                                                                                                                                                                                                                                                                                                                                                                                                                                                                                                                                                                                                                                                   |   |                        |                                            |    |                        |                                       |   |                        |                                                                 |    |                         |                        |   |                      |                              |   |                      |                   |   |                      |                |   |                      |     |   |                      |             |    |                       |        |    |                       |             |    |                       |       |    |                       |      |
| 275 | [babefeed_outcome]<br>Show the field ONLY if:<br>[babealive_swf] = '1'                                                                  | Is the baby being exclusively breastfed                                                                                                                                                                              | yesno<br><table border="1"> <tr> <td>1</td> <td>Yes</td> </tr> <tr> <td>0</td> <td>No</td> </tr> </table>                                                                                                                                                                                                                                                                                                                                                                                                                                                                                                                                                                                                                                                                                                                                                                                                                                                                                                                                                         | 1 | Yes                    | 0                                          | No |                        |                                       |   |                        |                                                                 |    |                         |                        |   |                      |                              |   |                      |                   |   |                      |                |   |                      |     |   |                      |             |    |                       |        |    |                       |             |    |                       |       |    |                       |      |
| 1   | Yes                                                                                                                                     |                                                                                                                                                                                                                      |                                                                                                                                                                                                                                                                                                                                                                                                                                                                                                                                                                                                                                                                                                                                                                                                                                                                                                                                                                                                                                                                   |   |                        |                                            |    |                        |                                       |   |                        |                                                                 |    |                         |                        |   |                      |                              |   |                      |                   |   |                      |                |   |                      |     |   |                      |             |    |                       |        |    |                       |             |    |                       |       |    |                       |      |
| 0   | No                                                                                                                                      |                                                                                                                                                                                                                      |                                                                                                                                                                                                                                                                                                                                                                                                                                                                                                                                                                                                                                                                                                                                                                                                                                                                                                                                                                                                                                                                   |   |                        |                                            |    |                        |                                       |   |                        |                                                                 |    |                         |                        |   |                      |                              |   |                      |                   |   |                      |                |   |                      |     |   |                      |             |    |                       |        |    |                       |             |    |                       |       |    |                       |      |
| 276 | [babeseek_swf]<br>Show the field ONLY if:<br>[babealive_swf] = '1'                                                                      | Did you seek care for the newborn at a facility at any time after being home post-discharge that DID NOT result in an admission?                                                                                     | yesno<br><table border="1"> <tr> <td>1</td> <td>Yes</td> </tr> <tr> <td>0</td> <td>No</td> </tr> </table>                                                                                                                                                                                                                                                                                                                                                                                                                                                                                                                                                                                                                                                                                                                                                                                                                                                                                                                                                         | 1 | Yes                    | 0                                          | No |                        |                                       |   |                        |                                                                 |    |                         |                        |   |                      |                              |   |                      |                   |   |                      |                |   |                      |     |   |                      |             |    |                       |        |    |                       |             |    |                       |       |    |                       |      |
| 1   | Yes                                                                                                                                     |                                                                                                                                                                                                                      |                                                                                                                                                                                                                                                                                                                                                                                                                                                                                                                                                                                                                                                                                                                                                                                                                                                                                                                                                                                                                                                                   |   |                        |                                            |    |                        |                                       |   |                        |                                                                 |    |                         |                        |   |                      |                              |   |                      |                   |   |                      |                |   |                      |     |   |                      |             |    |                       |        |    |                       |             |    |                       |       |    |                       |      |
| 0   | No                                                                                                                                      |                                                                                                                                                                                                                      |                                                                                                                                                                                                                                                                                                                                                                                                                                                                                                                                                                                                                                                                                                                                                                                                                                                                                                                                                                                                                                                                   |   |                        |                                            |    |                        |                                       |   |                        |                                                                 |    |                         |                        |   |                      |                              |   |                      |                   |   |                      |                |   |                      |     |   |                      |             |    |                       |        |    |                       |             |    |                       |       |    |                       |      |
| 277 | [babeseekage_swf]<br>Show the field ONLY if:<br>[babeseek_swf] = '1'                                                                    | How many days old was the baby during the first such visit?                                                                                                                                                          | text (integer, Min: 1, Max: 42)                                                                                                                                                                                                                                                                                                                                                                                                                                                                                                                                                                                                                                                                                                                                                                                                                                                                                                                                                                                                                                   |   |                        |                                            |    |                        |                                       |   |                        |                                                                 |    |                         |                        |   |                      |                              |   |                      |                   |   |                      |                |   |                      |     |   |                      |             |    |                       |        |    |                       |             |    |                       |       |    |                       |      |
| 278 | [babeseekpathway_swf]<br>Show the field ONLY if:<br>[babeseek_swf] = '1'                                                                | What was the care-seeking pathway for this visit?                                                                                                                                                                    | checkbox<br><table border="1"> <tr> <td>1</td> <td>babeseekpathway_swf__1</td> <td>Routine well-baby visit identified problem</td> </tr> <tr> <td>2</td> <td>babeseekpathway_swf__2</td> <td>Self referral due to parental concern</td> </tr> <tr> <td>3</td> <td>babeseekpathway_swf__3</td> <td>Both self-referral and well-baby visit resulted in care seeking</td> </tr> <tr> <td>98</td> <td>babeseekpathway_swf__98</td> <td>Other</td> </tr> </table>                                                                                                                                                                                                                                                                                                                                                                                                                                                                                                                                                                                                      | 1 | babeseekpathway_swf__1 | Routine well-baby visit identified problem | 2  | babeseekpathway_swf__2 | Self referral due to parental concern | 3 | babeseekpathway_swf__3 | Both self-referral and well-baby visit resulted in care seeking | 98 | babeseekpathway_swf__98 | Other                  |   |                      |                              |   |                      |                   |   |                      |                |   |                      |     |   |                      |             |    |                       |        |    |                       |             |    |                       |       |    |                       |      |
| 1   | babeseekpathway_swf__1                                                                                                                  | Routine well-baby visit identified problem                                                                                                                                                                           |                                                                                                                                                                                                                                                                                                                                                                                                                                                                                                                                                                                                                                                                                                                                                                                                                                                                                                                                                                                                                                                                   |   |                        |                                            |    |                        |                                       |   |                        |                                                                 |    |                         |                        |   |                      |                              |   |                      |                   |   |                      |                |   |                      |     |   |                      |             |    |                       |        |    |                       |             |    |                       |       |    |                       |      |
| 2   | babeseekpathway_swf__2                                                                                                                  | Self referral due to parental concern                                                                                                                                                                                |                                                                                                                                                                                                                                                                                                                                                                                                                                                                                                                                                                                                                                                                                                                                                                                                                                                                                                                                                                                                                                                                   |   |                        |                                            |    |                        |                                       |   |                        |                                                                 |    |                         |                        |   |                      |                              |   |                      |                   |   |                      |                |   |                      |     |   |                      |             |    |                       |        |    |                       |             |    |                       |       |    |                       |      |
| 3   | babeseekpathway_swf__3                                                                                                                  | Both self-referral and well-baby visit resulted in care seeking                                                                                                                                                      |                                                                                                                                                                                                                                                                                                                                                                                                                                                                                                                                                                                                                                                                                                                                                                                                                                                                                                                                                                                                                                                                   |   |                        |                                            |    |                        |                                       |   |                        |                                                                 |    |                         |                        |   |                      |                              |   |                      |                   |   |                      |                |   |                      |     |   |                      |             |    |                       |        |    |                       |             |    |                       |       |    |                       |      |
| 98  | babeseekpathway_swf__98                                                                                                                 | Other                                                                                                                                                                                                                |                                                                                                                                                                                                                                                                                                                                                                                                                                                                                                                                                                                                                                                                                                                                                                                                                                                                                                                                                                                                                                                                   |   |                        |                                            |    |                        |                                       |   |                        |                                                                 |    |                         |                        |   |                      |                              |   |                      |                   |   |                      |                |   |                      |     |   |                      |             |    |                       |        |    |                       |             |    |                       |       |    |                       |      |
| 279 | [babeseekpathwayother_swf]<br>Show the field ONLY if:<br>[babeseekpathway_swf(98)] = '1'                                                | Other pathway:                                                                                                                                                                                                       | text                                                                                                                                                                                                                                                                                                                                                                                                                                                                                                                                                                                                                                                                                                                                                                                                                                                                                                                                                                                                                                                              |   |                        |                                            |    |                        |                                       |   |                        |                                                                 |    |                         |                        |   |                      |                              |   |                      |                   |   |                      |                |   |                      |     |   |                      |             |    |                       |        |    |                       |             |    |                       |       |    |                       |      |
| 280 | [pnc_baby_swf]<br>Show the field ONLY if:<br>[dispb_b_neo][current-instance] != '3' and [admitdisposition_neo][current-instance] != '1' | Section Header: <i>Well-baby visits (i.e. PNC visits)</i><br>How many well-baby visits were conducted in the first 6 weeks (i.e. post-natal care visits for the baby) during which your baby was physically examined | dropdown<br><table border="1"> <tr> <td>0</td> <td>0</td> </tr> <tr> <td>1</td> <td>1</td> </tr> <tr> <td>2</td> <td>2</td> </tr> <tr> <td>3</td> <td>3</td> </tr> <tr> <td>4</td> <td>&gt;3</td> </tr> </table>                                                                                                                                                                                                                                                                                                                                                                                                                                                                                                                                                                                                                                                                                                                                                                                                                                                  | 0 | 0                      | 1                                          | 1  | 2                      | 2                                     | 3 | 3                      | 4                                                               | >3 |                         |                        |   |                      |                              |   |                      |                   |   |                      |                |   |                      |     |   |                      |             |    |                       |        |    |                       |             |    |                       |       |    |                       |      |
| 0   | 0                                                                                                                                       |                                                                                                                                                                                                                      |                                                                                                                                                                                                                                                                                                                                                                                                                                                                                                                                                                                                                                                                                                                                                                                                                                                                                                                                                                                                                                                                   |   |                        |                                            |    |                        |                                       |   |                        |                                                                 |    |                         |                        |   |                      |                              |   |                      |                   |   |                      |                |   |                      |     |   |                      |             |    |                       |        |    |                       |             |    |                       |       |    |                       |      |
| 1   | 1                                                                                                                                       |                                                                                                                                                                                                                      |                                                                                                                                                                                                                                                                                                                                                                                                                                                                                                                                                                                                                                                                                                                                                                                                                                                                                                                                                                                                                                                                   |   |                        |                                            |    |                        |                                       |   |                        |                                                                 |    |                         |                        |   |                      |                              |   |                      |                   |   |                      |                |   |                      |     |   |                      |             |    |                       |        |    |                       |             |    |                       |       |    |                       |      |
| 2   | 2                                                                                                                                       |                                                                                                                                                                                                                      |                                                                                                                                                                                                                                                                                                                                                                                                                                                                                                                                                                                                                                                                                                                                                                                                                                                                                                                                                                                                                                                                   |   |                        |                                            |    |                        |                                       |   |                        |                                                                 |    |                         |                        |   |                      |                              |   |                      |                   |   |                      |                |   |                      |     |   |                      |             |    |                       |        |    |                       |             |    |                       |       |    |                       |      |
| 3   | 3                                                                                                                                       |                                                                                                                                                                                                                      |                                                                                                                                                                                                                                                                                                                                                                                                                                                                                                                                                                                                                                                                                                                                                                                                                                                                                                                                                                                                                                                                   |   |                        |                                            |    |                        |                                       |   |                        |                                                                 |    |                         |                        |   |                      |                              |   |                      |                   |   |                      |                |   |                      |     |   |                      |             |    |                       |        |    |                       |             |    |                       |       |    |                       |      |
| 4   | >3                                                                                                                                      |                                                                                                                                                                                                                      |                                                                                                                                                                                                                                                                                                                                                                                                                                                                                                                                                                                                                                                                                                                                                                                                                                                                                                                                                                                                                                                                   |   |                        |                                            |    |                        |                                       |   |                        |                                                                 |    |                         |                        |   |                      |                              |   |                      |                   |   |                      |                |   |                      |     |   |                      |             |    |                       |        |    |                       |             |    |                       |       |    |                       |      |

|                                                                                                |                                                                                                                              |                                                                                                                     |                                                                                                                                                                                                                                                                                                                                                                                                                                                                                                                |   |                       |                                                   |            |                       |                                  |   |                       |                                         |   |                       |                                   |    |                        |       |
|------------------------------------------------------------------------------------------------|------------------------------------------------------------------------------------------------------------------------------|---------------------------------------------------------------------------------------------------------------------|----------------------------------------------------------------------------------------------------------------------------------------------------------------------------------------------------------------------------------------------------------------------------------------------------------------------------------------------------------------------------------------------------------------------------------------------------------------------------------------------------------------|---|-----------------------|---------------------------------------------------|------------|-----------------------|----------------------------------|---|-----------------------|-----------------------------------------|---|-----------------------|-----------------------------------|----|------------------------|-------|
| 281                                                                                            | [babepnc1_swf]<br>Show the field ONLY if:<br>[pnc_baby_swf] > 0                                                              | How many days old was this baby at the first visit?                                                                 | text (integer, Min: 1, Max: 42)                                                                                                                                                                                                                                                                                                                                                                                                                                                                                |   |                       |                                                   |            |                       |                                  |   |                       |                                         |   |                       |                                   |    |                        |       |
| 282                                                                                            | [babepnc2_swf]<br>Show the field ONLY if:<br>[pnc_baby_swf] > 1                                                              | How many days old was this baby at the second visit?                                                                | text (integer, Min: 1, Max: 42)                                                                                                                                                                                                                                                                                                                                                                                                                                                                                |   |                       |                                                   |            |                       |                                  |   |                       |                                         |   |                       |                                   |    |                        |       |
| 283                                                                                            | [babepnc3_swf]<br>Show the field ONLY if:<br>[pnc_baby_swf] > 2                                                              | How many days old was this baby at the third visit?                                                                 | text (integer, Min: 1, Max: 42)                                                                                                                                                                                                                                                                                                                                                                                                                                                                                |   |                       |                                                   |            |                       |                                  |   |                       |                                         |   |                       |                                   |    |                        |       |
| 284                                                                                            | [comment2_swf]                                                                                                               | Comment                                                                                                             | notes                                                                                                                                                                                                                                                                                                                                                                                                                                                                                                          |   |                       |                                                   |            |                       |                                  |   |                       |                                         |   |                       |                                   |    |                        |       |
| 285                                                                                            | [six_week_follow_up_neonatal_complete]                                                                                       | Section Header: <i>Form Status</i><br>Complete?                                                                     | dropdown<br><table border="1"> <tr><td>0</td><td>Incomplete</td></tr> <tr><td>1</td><td>Unverified</td></tr> <tr><td>2</td><td>Complete</td></tr> </table>                                                                                                                                                                                                                                                                                                                                                     | 0 | Incomplete            | 1                                                 | Unverified | 2                     | Complete                         |   |                       |                                         |   |                       |                                   |    |                        |       |
| 0                                                                                              | Incomplete                                                                                                                   |                                                                                                                     |                                                                                                                                                                                                                                                                                                                                                                                                                                                                                                                |   |                       |                                                   |            |                       |                                  |   |                       |                                         |   |                       |                                   |    |                        |       |
| 1                                                                                              | Unverified                                                                                                                   |                                                                                                                     |                                                                                                                                                                                                                                                                                                                                                                                                                                                                                                                |   |                       |                                                   |            |                       |                                  |   |                       |                                         |   |                       |                                   |    |                        |       |
| 2                                                                                              | Complete                                                                                                                     |                                                                                                                     |                                                                                                                                                                                                                                                                                                                                                                                                                                                                                                                |   |                       |                                                   |            |                       |                                  |   |                       |                                         |   |                       |                                   |    |                        |       |
| Instrument: <b>12. Six Week Follow Up Wellness Checks</b> (six_week_follow_up_wellness_checks) |                                                                                                                              |                                                                                                                     |                                                                                                                                                                                                                                                                                                                                                                                                                                                                                                                |   |                       |                                                   |            |                       |                                  |   |                       |                                         |   |                       |                                   |    |                        |       |
| 286                                                                                            | [momchecks_swf]<br>Show the field ONLY if:<br>[momalive_swf] = '1'                                                           | Did you know you needed to attend a routine wellness check for yourself after being sent home?                      | yesno<br><table border="1"> <tr><td>1</td><td>Yes</td></tr> <tr><td>0</td><td>No</td></tr> </table>                                                                                                                                                                                                                                                                                                                                                                                                            | 1 | Yes                   | 0                                                 | No         |                       |                                  |   |                       |                                         |   |                       |                                   |    |                        |       |
| 1                                                                                              | Yes                                                                                                                          |                                                                                                                     |                                                                                                                                                                                                                                                                                                                                                                                                                                                                                                                |   |                       |                                                   |            |                       |                                  |   |                       |                                         |   |                       |                                   |    |                        |       |
| 0                                                                                              | No                                                                                                                           |                                                                                                                     |                                                                                                                                                                                                                                                                                                                                                                                                                                                                                                                |   |                       |                                                   |            |                       |                                  |   |                       |                                         |   |                       |                                   |    |                        |       |
| 287                                                                                            | [babechecks_swf]<br>Show the field ONLY if:<br>[babealive_swf][first-instance] = '1' or [babealive_swf][last-instance] = '1' | Did you know you needed to attend a routine wellness check for your baby after being sent home?                     | yesno<br><table border="1"> <tr><td>1</td><td>Yes</td></tr> <tr><td>0</td><td>No</td></tr> </table>                                                                                                                                                                                                                                                                                                                                                                                                            | 1 | Yes                   | 0                                                 | No         |                       |                                  |   |                       |                                         |   |                       |                                   |    |                        |       |
| 1                                                                                              | Yes                                                                                                                          |                                                                                                                     |                                                                                                                                                                                                                                                                                                                                                                                                                                                                                                                |   |                       |                                                   |            |                       |                                  |   |                       |                                         |   |                       |                                   |    |                        |       |
| 0                                                                                              | No                                                                                                                           |                                                                                                                     |                                                                                                                                                                                                                                                                                                                                                                                                                                                                                                                |   |                       |                                                   |            |                       |                                  |   |                       |                                         |   |                       |                                   |    |                        |       |
| 288                                                                                            | [wellnesstimesthink_swf]                                                                                                     | How many times do you think you need to attend a routine wellness check for you or your baby after being sent home? | radio<br><table border="1"> <tr><td>0</td><td>0</td></tr> <tr><td>1</td><td>1</td></tr> <tr><td>2</td><td>2</td></tr> <tr><td>3</td><td>3</td></tr> <tr><td>4</td><td>4</td></tr> <tr><td>5</td><td>More than 4</td></tr> </table>                                                                                                                                                                                                                                                                             | 0 | 0                     | 1                                                 | 1          | 2                     | 2                                | 3 | 3                     | 4                                       | 4 | 5                     | More than 4                       |    |                        |       |
| 0                                                                                              | 0                                                                                                                            |                                                                                                                     |                                                                                                                                                                                                                                                                                                                                                                                                                                                                                                                |   |                       |                                                   |            |                       |                                  |   |                       |                                         |   |                       |                                   |    |                        |       |
| 1                                                                                              | 1                                                                                                                            |                                                                                                                     |                                                                                                                                                                                                                                                                                                                                                                                                                                                                                                                |   |                       |                                                   |            |                       |                                  |   |                       |                                         |   |                       |                                   |    |                        |       |
| 2                                                                                              | 2                                                                                                                            |                                                                                                                     |                                                                                                                                                                                                                                                                                                                                                                                                                                                                                                                |   |                       |                                                   |            |                       |                                  |   |                       |                                         |   |                       |                                   |    |                        |       |
| 3                                                                                              | 3                                                                                                                            |                                                                                                                     |                                                                                                                                                                                                                                                                                                                                                                                                                                                                                                                |   |                       |                                                   |            |                       |                                  |   |                       |                                         |   |                       |                                   |    |                        |       |
| 4                                                                                              | 4                                                                                                                            |                                                                                                                     |                                                                                                                                                                                                                                                                                                                                                                                                                                                                                                                |   |                       |                                                   |            |                       |                                  |   |                       |                                         |   |                       |                                   |    |                        |       |
| 5                                                                                              | More than 4                                                                                                                  |                                                                                                                     |                                                                                                                                                                                                                                                                                                                                                                                                                                                                                                                |   |                       |                                                   |            |                       |                                  |   |                       |                                         |   |                       |                                   |    |                        |       |
| 289                                                                                            | [wellnesssource_swf]<br>Show the field ONLY if:<br>[momchecks_swf] = '1' or [babechecks_swf] = '1'                           | How did you know to do this?                                                                                        | checkbox<br><table border="1"> <tr><td>1</td><td>wellnesssource_swf__1</td><td>Information from a healthcare worker at discharge</td></tr> <tr><td>2</td><td>wellnesssource_swf__2</td><td>Previous pregnancy or experience</td></tr> <tr><td>3</td><td>wellnesssource_swf__3</td><td>Guidance from a family member or friend</td></tr> <tr><td>4</td><td>wellnesssource_swf__4</td><td>Date listed on the discharge form</td></tr> <tr><td>98</td><td>wellnesssource_swf__98</td><td>Other</td></tr> </table> | 1 | wellnesssource_swf__1 | Information from a healthcare worker at discharge | 2          | wellnesssource_swf__2 | Previous pregnancy or experience | 3 | wellnesssource_swf__3 | Guidance from a family member or friend | 4 | wellnesssource_swf__4 | Date listed on the discharge form | 98 | wellnesssource_swf__98 | Other |
| 1                                                                                              | wellnesssource_swf__1                                                                                                        | Information from a healthcare worker at discharge                                                                   |                                                                                                                                                                                                                                                                                                                                                                                                                                                                                                                |   |                       |                                                   |            |                       |                                  |   |                       |                                         |   |                       |                                   |    |                        |       |
| 2                                                                                              | wellnesssource_swf__2                                                                                                        | Previous pregnancy or experience                                                                                    |                                                                                                                                                                                                                                                                                                                                                                                                                                                                                                                |   |                       |                                                   |            |                       |                                  |   |                       |                                         |   |                       |                                   |    |                        |       |
| 3                                                                                              | wellnesssource_swf__3                                                                                                        | Guidance from a family member or friend                                                                             |                                                                                                                                                                                                                                                                                                                                                                                                                                                                                                                |   |                       |                                                   |            |                       |                                  |   |                       |                                         |   |                       |                                   |    |                        |       |
| 4                                                                                              | wellnesssource_swf__4                                                                                                        | Date listed on the discharge form                                                                                   |                                                                                                                                                                                                                                                                                                                                                                                                                                                                                                                |   |                       |                                                   |            |                       |                                  |   |                       |                                         |   |                       |                                   |    |                        |       |
| 98                                                                                             | wellnesssource_swf__98                                                                                                       | Other                                                                                                               |                                                                                                                                                                                                                                                                                                                                                                                                                                                                                                                |   |                       |                                                   |            |                       |                                  |   |                       |                                         |   |                       |                                   |    |                        |       |
| 290                                                                                            | [wellnesssourceother_swf]<br>Show the field ONLY if:<br>[wellnesssource_swf(98)] = '1'                                       | Specify any other ways you knew to do this.                                                                         | text                                                                                                                                                                                                                                                                                                                                                                                                                                                                                                           |   |                       |                                                   |            |                       |                                  |   |                       |                                         |   |                       |                                   |    |                        |       |
| 291                                                                                            | [wellnesstimes_swf]<br>Show the field ONLY if:<br>[momchecks_swf] = '1' or [babechecks_swf] = '1'                            | How many times were you told to seek routine wellness checks?                                                       | radio<br><table border="1"> <tr><td>0</td><td>0</td></tr> <tr><td>1</td><td>1</td></tr> <tr><td>2</td><td>2</td></tr> <tr><td>3</td><td>3</td></tr> <tr><td>4</td><td>4</td></tr> <tr><td>5</td><td>More than 4</td></tr> </table><br>Field Annotation: @HIDDEN                                                                                                                                                                                                                                                | 0 | 0                     | 1                                                 | 1          | 2                     | 2                                | 3 | 3                     | 4                                       | 4 | 5                     | More than 4                       |    |                        |       |
| 0                                                                                              | 0                                                                                                                            |                                                                                                                     |                                                                                                                                                                                                                                                                                                                                                                                                                                                                                                                |   |                       |                                                   |            |                       |                                  |   |                       |                                         |   |                       |                                   |    |                        |       |
| 1                                                                                              | 1                                                                                                                            |                                                                                                                     |                                                                                                                                                                                                                                                                                                                                                                                                                                                                                                                |   |                       |                                                   |            |                       |                                  |   |                       |                                         |   |                       |                                   |    |                        |       |
| 2                                                                                              | 2                                                                                                                            |                                                                                                                     |                                                                                                                                                                                                                                                                                                                                                                                                                                                                                                                |   |                       |                                                   |            |                       |                                  |   |                       |                                         |   |                       |                                   |    |                        |       |
| 3                                                                                              | 3                                                                                                                            |                                                                                                                     |                                                                                                                                                                                                                                                                                                                                                                                                                                                                                                                |   |                       |                                                   |            |                       |                                  |   |                       |                                         |   |                       |                                   |    |                        |       |
| 4                                                                                              | 4                                                                                                                            |                                                                                                                     |                                                                                                                                                                                                                                                                                                                                                                                                                                                                                                                |   |                       |                                                   |            |                       |                                  |   |                       |                                         |   |                       |                                   |    |                        |       |
| 5                                                                                              | More than 4                                                                                                                  |                                                                                                                     |                                                                                                                                                                                                                                                                                                                                                                                                                                                                                                                |   |                       |                                                   |            |                       |                                  |   |                       |                                         |   |                       |                                   |    |                        |       |

|     |                                                                                                              |                                                                                                                                                              |                                                                                                                                                                                                                                                                                                                                                                                                                                                                                                                                                                                                                                                                                                                                                                                                                                                                                                                                                                                                                                                                                                                                                                                                                       |   |                          |                                  |   |                          |                      |   |                          |                   |   |                          |                              |   |                          |                      |    |                          |                                                  |    |                          |                                                 |   |                          |                       |   |                          |                                                                      |    |                           |                              |    |                           |       |    |                           |      |
|-----|--------------------------------------------------------------------------------------------------------------|--------------------------------------------------------------------------------------------------------------------------------------------------------------|-----------------------------------------------------------------------------------------------------------------------------------------------------------------------------------------------------------------------------------------------------------------------------------------------------------------------------------------------------------------------------------------------------------------------------------------------------------------------------------------------------------------------------------------------------------------------------------------------------------------------------------------------------------------------------------------------------------------------------------------------------------------------------------------------------------------------------------------------------------------------------------------------------------------------------------------------------------------------------------------------------------------------------------------------------------------------------------------------------------------------------------------------------------------------------------------------------------------------|---|--------------------------|----------------------------------|---|--------------------------|----------------------|---|--------------------------|-------------------|---|--------------------------|------------------------------|---|--------------------------|----------------------|----|--------------------------|--------------------------------------------------|----|--------------------------|-------------------------------------------------|---|--------------------------|-----------------------|---|--------------------------|----------------------------------------------------------------------|----|---------------------------|------------------------------|----|---------------------------|-------|----|---------------------------|------|
| 292 | <p>[wellnesswhen_swf]</p> <p>Show the field ONLY if:<br/>[momchecks_swf] = '1' or [babechecks_swf] = '1'</p> | <p>What did the information you received tell you about when you should attend a routine wellness check (time periods relate to days/hours after birth)?</p> | <p>checkbox</p> <table border="1"> <tr> <td>1</td> <td>wellnesswhen_swf__1</td> <td>1 day (24 hours)</td> </tr> <tr> <td>2</td> <td>wellnesswhen_swf__2</td> <td>3 days (48-72 hours)</td> </tr> <tr> <td>3</td> <td>wellnesswhen_swf__3</td> <td>6 days</td> </tr> <tr> <td>4</td> <td>wellnesswhen_swf__4</td> <td>7-14 days</td> </tr> <tr> <td>5</td> <td>wellnesswhen_swf__5</td> <td>6 weeks</td> </tr> <tr> <td>98</td> <td>wellnesswhen_swf__98</td> <td>Other</td> </tr> <tr> <td>99</td> <td>wellnesswhen_swf__99</td> <td>None</td> </tr> </table>                                                                                                                                                                                                                                                                                                                                                                                                                                                                                                                                                                                                                                                         | 1 | wellnesswhen_swf__1      | 1 day (24 hours)                 | 2 | wellnesswhen_swf__2      | 3 days (48-72 hours) | 3 | wellnesswhen_swf__3      | 6 days            | 4 | wellnesswhen_swf__4      | 7-14 days                    | 5 | wellnesswhen_swf__5      | 6 weeks              | 98 | wellnesswhen_swf__98     | Other                                            | 99 | wellnesswhen_swf__99     | None                                            |   |                          |                       |   |                          |                                                                      |    |                           |                              |    |                           |       |    |                           |      |
| 1   | wellnesswhen_swf__1                                                                                          | 1 day (24 hours)                                                                                                                                             |                                                                                                                                                                                                                                                                                                                                                                                                                                                                                                                                                                                                                                                                                                                                                                                                                                                                                                                                                                                                                                                                                                                                                                                                                       |   |                          |                                  |   |                          |                      |   |                          |                   |   |                          |                              |   |                          |                      |    |                          |                                                  |    |                          |                                                 |   |                          |                       |   |                          |                                                                      |    |                           |                              |    |                           |       |    |                           |      |
| 2   | wellnesswhen_swf__2                                                                                          | 3 days (48-72 hours)                                                                                                                                         |                                                                                                                                                                                                                                                                                                                                                                                                                                                                                                                                                                                                                                                                                                                                                                                                                                                                                                                                                                                                                                                                                                                                                                                                                       |   |                          |                                  |   |                          |                      |   |                          |                   |   |                          |                              |   |                          |                      |    |                          |                                                  |    |                          |                                                 |   |                          |                       |   |                          |                                                                      |    |                           |                              |    |                           |       |    |                           |      |
| 3   | wellnesswhen_swf__3                                                                                          | 6 days                                                                                                                                                       |                                                                                                                                                                                                                                                                                                                                                                                                                                                                                                                                                                                                                                                                                                                                                                                                                                                                                                                                                                                                                                                                                                                                                                                                                       |   |                          |                                  |   |                          |                      |   |                          |                   |   |                          |                              |   |                          |                      |    |                          |                                                  |    |                          |                                                 |   |                          |                       |   |                          |                                                                      |    |                           |                              |    |                           |       |    |                           |      |
| 4   | wellnesswhen_swf__4                                                                                          | 7-14 days                                                                                                                                                    |                                                                                                                                                                                                                                                                                                                                                                                                                                                                                                                                                                                                                                                                                                                                                                                                                                                                                                                                                                                                                                                                                                                                                                                                                       |   |                          |                                  |   |                          |                      |   |                          |                   |   |                          |                              |   |                          |                      |    |                          |                                                  |    |                          |                                                 |   |                          |                       |   |                          |                                                                      |    |                           |                              |    |                           |       |    |                           |      |
| 5   | wellnesswhen_swf__5                                                                                          | 6 weeks                                                                                                                                                      |                                                                                                                                                                                                                                                                                                                                                                                                                                                                                                                                                                                                                                                                                                                                                                                                                                                                                                                                                                                                                                                                                                                                                                                                                       |   |                          |                                  |   |                          |                      |   |                          |                   |   |                          |                              |   |                          |                      |    |                          |                                                  |    |                          |                                                 |   |                          |                       |   |                          |                                                                      |    |                           |                              |    |                           |       |    |                           |      |
| 98  | wellnesswhen_swf__98                                                                                         | Other                                                                                                                                                        |                                                                                                                                                                                                                                                                                                                                                                                                                                                                                                                                                                                                                                                                                                                                                                                                                                                                                                                                                                                                                                                                                                                                                                                                                       |   |                          |                                  |   |                          |                      |   |                          |                   |   |                          |                              |   |                          |                      |    |                          |                                                  |    |                          |                                                 |   |                          |                       |   |                          |                                                                      |    |                           |                              |    |                           |       |    |                           |      |
| 99  | wellnesswhen_swf__99                                                                                         | None                                                                                                                                                         |                                                                                                                                                                                                                                                                                                                                                                                                                                                                                                                                                                                                                                                                                                                                                                                                                                                                                                                                                                                                                                                                                                                                                                                                                       |   |                          |                                  |   |                          |                      |   |                          |                   |   |                          |                              |   |                          |                      |    |                          |                                                  |    |                          |                                                 |   |                          |                       |   |                          |                                                                      |    |                           |                              |    |                           |       |    |                           |      |
| 293 | <p>[wellnesswhenother_swf]</p> <p>Show the field ONLY if:<br/>[wellnesswhen_swf(98)] = '1'</p>               | <p>Specify the other times you were told to do this.</p>                                                                                                     | <p>text</p>                                                                                                                                                                                                                                                                                                                                                                                                                                                                                                                                                                                                                                                                                                                                                                                                                                                                                                                                                                                                                                                                                                                                                                                                           |   |                          |                                  |   |                          |                      |   |                          |                   |   |                          |                              |   |                          |                      |    |                          |                                                  |    |                          |                                                 |   |                          |                       |   |                          |                                                                      |    |                           |                              |    |                           |       |    |                           |      |
| 294 | <p>[wellnessreasonnot_swf]</p>                                                                               | <p>Is there any reason you may not have attended?</p>                                                                                                        | <p>checkbox</p> <table border="1"> <tr> <td>1</td> <td>wellnessreasonnot_swf__1</td> <td>I did not think it was necessary</td> </tr> <tr> <td>2</td> <td>wellnessreasonnot_swf__2</td> <td>I did not know</td> </tr> <tr> <td>3</td> <td>wellnessreasonnot_swf__3</td> <td>Cost of transport</td> </tr> <tr> <td>4</td> <td>wellnessreasonnot_swf__4</td> <td>Distance to nearest facility</td> </tr> <tr> <td>5</td> <td>wellnessreasonnot_swf__5</td> <td>Bad weather or roads</td> </tr> <tr> <td>6</td> <td>wellnessreasonnot_swf__6</td> <td>No one to look after other children (child care)</td> </tr> <tr> <td>7</td> <td>wellnessreasonnot_swf__7</td> <td>Previous bad experience with the health workers</td> </tr> <tr> <td>8</td> <td>wellnessreasonnot_swf__8</td> <td>Fears or insecurities</td> </tr> <tr> <td>9</td> <td>wellnessreasonnot_swf__9</td> <td>Decision is made by my husband/partner or someone else in the family</td> </tr> <tr> <td>10</td> <td>wellnessreasonnot_swf__10</td> <td>Cost of care at the facility</td> </tr> <tr> <td>98</td> <td>wellnessreasonnot_swf__98</td> <td>Other</td> </tr> <tr> <td>99</td> <td>wellnessreasonnot_swf__99</td> <td>None</td> </tr> </table> | 1 | wellnessreasonnot_swf__1 | I did not think it was necessary | 2 | wellnessreasonnot_swf__2 | I did not know       | 3 | wellnessreasonnot_swf__3 | Cost of transport | 4 | wellnessreasonnot_swf__4 | Distance to nearest facility | 5 | wellnessreasonnot_swf__5 | Bad weather or roads | 6  | wellnessreasonnot_swf__6 | No one to look after other children (child care) | 7  | wellnessreasonnot_swf__7 | Previous bad experience with the health workers | 8 | wellnessreasonnot_swf__8 | Fears or insecurities | 9 | wellnessreasonnot_swf__9 | Decision is made by my husband/partner or someone else in the family | 10 | wellnessreasonnot_swf__10 | Cost of care at the facility | 98 | wellnessreasonnot_swf__98 | Other | 99 | wellnessreasonnot_swf__99 | None |
| 1   | wellnessreasonnot_swf__1                                                                                     | I did not think it was necessary                                                                                                                             |                                                                                                                                                                                                                                                                                                                                                                                                                                                                                                                                                                                                                                                                                                                                                                                                                                                                                                                                                                                                                                                                                                                                                                                                                       |   |                          |                                  |   |                          |                      |   |                          |                   |   |                          |                              |   |                          |                      |    |                          |                                                  |    |                          |                                                 |   |                          |                       |   |                          |                                                                      |    |                           |                              |    |                           |       |    |                           |      |
| 2   | wellnessreasonnot_swf__2                                                                                     | I did not know                                                                                                                                               |                                                                                                                                                                                                                                                                                                                                                                                                                                                                                                                                                                                                                                                                                                                                                                                                                                                                                                                                                                                                                                                                                                                                                                                                                       |   |                          |                                  |   |                          |                      |   |                          |                   |   |                          |                              |   |                          |                      |    |                          |                                                  |    |                          |                                                 |   |                          |                       |   |                          |                                                                      |    |                           |                              |    |                           |       |    |                           |      |
| 3   | wellnessreasonnot_swf__3                                                                                     | Cost of transport                                                                                                                                            |                                                                                                                                                                                                                                                                                                                                                                                                                                                                                                                                                                                                                                                                                                                                                                                                                                                                                                                                                                                                                                                                                                                                                                                                                       |   |                          |                                  |   |                          |                      |   |                          |                   |   |                          |                              |   |                          |                      |    |                          |                                                  |    |                          |                                                 |   |                          |                       |   |                          |                                                                      |    |                           |                              |    |                           |       |    |                           |      |
| 4   | wellnessreasonnot_swf__4                                                                                     | Distance to nearest facility                                                                                                                                 |                                                                                                                                                                                                                                                                                                                                                                                                                                                                                                                                                                                                                                                                                                                                                                                                                                                                                                                                                                                                                                                                                                                                                                                                                       |   |                          |                                  |   |                          |                      |   |                          |                   |   |                          |                              |   |                          |                      |    |                          |                                                  |    |                          |                                                 |   |                          |                       |   |                          |                                                                      |    |                           |                              |    |                           |       |    |                           |      |
| 5   | wellnessreasonnot_swf__5                                                                                     | Bad weather or roads                                                                                                                                         |                                                                                                                                                                                                                                                                                                                                                                                                                                                                                                                                                                                                                                                                                                                                                                                                                                                                                                                                                                                                                                                                                                                                                                                                                       |   |                          |                                  |   |                          |                      |   |                          |                   |   |                          |                              |   |                          |                      |    |                          |                                                  |    |                          |                                                 |   |                          |                       |   |                          |                                                                      |    |                           |                              |    |                           |       |    |                           |      |
| 6   | wellnessreasonnot_swf__6                                                                                     | No one to look after other children (child care)                                                                                                             |                                                                                                                                                                                                                                                                                                                                                                                                                                                                                                                                                                                                                                                                                                                                                                                                                                                                                                                                                                                                                                                                                                                                                                                                                       |   |                          |                                  |   |                          |                      |   |                          |                   |   |                          |                              |   |                          |                      |    |                          |                                                  |    |                          |                                                 |   |                          |                       |   |                          |                                                                      |    |                           |                              |    |                           |       |    |                           |      |
| 7   | wellnessreasonnot_swf__7                                                                                     | Previous bad experience with the health workers                                                                                                              |                                                                                                                                                                                                                                                                                                                                                                                                                                                                                                                                                                                                                                                                                                                                                                                                                                                                                                                                                                                                                                                                                                                                                                                                                       |   |                          |                                  |   |                          |                      |   |                          |                   |   |                          |                              |   |                          |                      |    |                          |                                                  |    |                          |                                                 |   |                          |                       |   |                          |                                                                      |    |                           |                              |    |                           |       |    |                           |      |
| 8   | wellnessreasonnot_swf__8                                                                                     | Fears or insecurities                                                                                                                                        |                                                                                                                                                                                                                                                                                                                                                                                                                                                                                                                                                                                                                                                                                                                                                                                                                                                                                                                                                                                                                                                                                                                                                                                                                       |   |                          |                                  |   |                          |                      |   |                          |                   |   |                          |                              |   |                          |                      |    |                          |                                                  |    |                          |                                                 |   |                          |                       |   |                          |                                                                      |    |                           |                              |    |                           |       |    |                           |      |
| 9   | wellnessreasonnot_swf__9                                                                                     | Decision is made by my husband/partner or someone else in the family                                                                                         |                                                                                                                                                                                                                                                                                                                                                                                                                                                                                                                                                                                                                                                                                                                                                                                                                                                                                                                                                                                                                                                                                                                                                                                                                       |   |                          |                                  |   |                          |                      |   |                          |                   |   |                          |                              |   |                          |                      |    |                          |                                                  |    |                          |                                                 |   |                          |                       |   |                          |                                                                      |    |                           |                              |    |                           |       |    |                           |      |
| 10  | wellnessreasonnot_swf__10                                                                                    | Cost of care at the facility                                                                                                                                 |                                                                                                                                                                                                                                                                                                                                                                                                                                                                                                                                                                                                                                                                                                                                                                                                                                                                                                                                                                                                                                                                                                                                                                                                                       |   |                          |                                  |   |                          |                      |   |                          |                   |   |                          |                              |   |                          |                      |    |                          |                                                  |    |                          |                                                 |   |                          |                       |   |                          |                                                                      |    |                           |                              |    |                           |       |    |                           |      |
| 98  | wellnessreasonnot_swf__98                                                                                    | Other                                                                                                                                                        |                                                                                                                                                                                                                                                                                                                                                                                                                                                                                                                                                                                                                                                                                                                                                                                                                                                                                                                                                                                                                                                                                                                                                                                                                       |   |                          |                                  |   |                          |                      |   |                          |                   |   |                          |                              |   |                          |                      |    |                          |                                                  |    |                          |                                                 |   |                          |                       |   |                          |                                                                      |    |                           |                              |    |                           |       |    |                           |      |
| 99  | wellnessreasonnot_swf__99                                                                                    | None                                                                                                                                                         |                                                                                                                                                                                                                                                                                                                                                                                                                                                                                                                                                                                                                                                                                                                                                                                                                                                                                                                                                                                                                                                                                                                                                                                                                       |   |                          |                                  |   |                          |                      |   |                          |                   |   |                          |                              |   |                          |                      |    |                          |                                                  |    |                          |                                                 |   |                          |                       |   |                          |                                                                      |    |                           |                              |    |                           |       |    |                           |      |
| 295 | <p>[wellnessreasonnotother_swf]</p> <p>Show the field ONLY if:<br/>[wellnessreasonnot_swf(98)] = '1'</p>     | <p>Specify other reason you may not have attended.</p>                                                                                                       | <p>text</p>                                                                                                                                                                                                                                                                                                                                                                                                                                                                                                                                                                                                                                                                                                                                                                                                                                                                                                                                                                                                                                                                                                                                                                                                           |   |                          |                                  |   |                          |                      |   |                          |                   |   |                          |                              |   |                          |                      |    |                          |                                                  |    |                          |                                                 |   |                          |                       |   |                          |                                                                      |    |                           |                              |    |                           |       |    |                           |      |

|                                                                    |                                               |                                                                                                                              |                                                                                                                                                                                                                                                                                                                                                                                                                                                                                                                                                                                                                                                                                                    |   |                        |                                        |            |                        |                                   |    |                        |                                     |        |                        |                                                                       |   |                        |                                                                           |                      |                         |                   |
|--------------------------------------------------------------------|-----------------------------------------------|------------------------------------------------------------------------------------------------------------------------------|----------------------------------------------------------------------------------------------------------------------------------------------------------------------------------------------------------------------------------------------------------------------------------------------------------------------------------------------------------------------------------------------------------------------------------------------------------------------------------------------------------------------------------------------------------------------------------------------------------------------------------------------------------------------------------------------------|---|------------------------|----------------------------------------|------------|------------------------|-----------------------------------|----|------------------------|-------------------------------------|--------|------------------------|-----------------------------------------------------------------------|---|------------------------|---------------------------------------------------------------------------|----------------------|-------------------------|-------------------|
| 296                                                                | [wellnessdiscuss_swf]                         | Were any of the following discussed with you by a healthcare worker regarding seeking care for you and your baby?            | checkbox <table border="1"> <tr> <td>1</td> <td>wellnessdiscuss_swf__1</td> <td>Seek care for illness or complications</td> </tr> <tr> <td>2</td> <td>wellnessdiscuss_swf__2</td> <td>Attend family planning at 6 weeks</td> </tr> <tr> <td>3</td> <td>wellnessdiscuss_swf__3</td> <td>Attend vaccination visit at 6 weeks</td> </tr> <tr> <td>4</td> <td>wellnessdiscuss_swf__4</td> <td>Attend routine wellness checks throughout the 6 week postnatal period</td> </tr> <tr> <td>5</td> <td>wellnessdiscuss_swf__5</td> <td>Healthcare workers would complete home visits for routine wellness checks</td> </tr> <tr> <td>99</td> <td>wellnessdiscuss_swf__99</td> <td>None</td> </tr> </table> | 1 | wellnessdiscuss_swf__1 | Seek care for illness or complications | 2          | wellnessdiscuss_swf__2 | Attend family planning at 6 weeks | 3  | wellnessdiscuss_swf__3 | Attend vaccination visit at 6 weeks | 4      | wellnessdiscuss_swf__4 | Attend routine wellness checks throughout the 6 week postnatal period | 5 | wellnessdiscuss_swf__5 | Healthcare workers would complete home visits for routine wellness checks | 99                   | wellnessdiscuss_swf__99 | None              |
| 1                                                                  | wellnessdiscuss_swf__1                        | Seek care for illness or complications                                                                                       |                                                                                                                                                                                                                                                                                                                                                                                                                                                                                                                                                                                                                                                                                                    |   |                        |                                        |            |                        |                                   |    |                        |                                     |        |                        |                                                                       |   |                        |                                                                           |                      |                         |                   |
| 2                                                                  | wellnessdiscuss_swf__2                        | Attend family planning at 6 weeks                                                                                            |                                                                                                                                                                                                                                                                                                                                                                                                                                                                                                                                                                                                                                                                                                    |   |                        |                                        |            |                        |                                   |    |                        |                                     |        |                        |                                                                       |   |                        |                                                                           |                      |                         |                   |
| 3                                                                  | wellnessdiscuss_swf__3                        | Attend vaccination visit at 6 weeks                                                                                          |                                                                                                                                                                                                                                                                                                                                                                                                                                                                                                                                                                                                                                                                                                    |   |                        |                                        |            |                        |                                   |    |                        |                                     |        |                        |                                                                       |   |                        |                                                                           |                      |                         |                   |
| 4                                                                  | wellnessdiscuss_swf__4                        | Attend routine wellness checks throughout the 6 week postnatal period                                                        |                                                                                                                                                                                                                                                                                                                                                                                                                                                                                                                                                                                                                                                                                                    |   |                        |                                        |            |                        |                                   |    |                        |                                     |        |                        |                                                                       |   |                        |                                                                           |                      |                         |                   |
| 5                                                                  | wellnessdiscuss_swf__5                        | Healthcare workers would complete home visits for routine wellness checks                                                    |                                                                                                                                                                                                                                                                                                                                                                                                                                                                                                                                                                                                                                                                                                    |   |                        |                                        |            |                        |                                   |    |                        |                                     |        |                        |                                                                       |   |                        |                                                                           |                      |                         |                   |
| 99                                                                 | wellnessdiscuss_swf__99                       | None                                                                                                                         |                                                                                                                                                                                                                                                                                                                                                                                                                                                                                                                                                                                                                                                                                                    |   |                        |                                        |            |                        |                                   |    |                        |                                     |        |                        |                                                                       |   |                        |                                                                           |                      |                         |                   |
| 297                                                                | [six_week_follow_up_wellness_checks_complete] | Section Header: <i>Form Status</i><br>Complete?                                                                              | dropdown <table border="1"> <tr> <td>0</td> <td>Incomplete</td> </tr> <tr> <td>1</td> <td>Unverified</td> </tr> <tr> <td>2</td> <td>Complete</td> </tr> </table>                                                                                                                                                                                                                                                                                                                                                                                                                                                                                                                                   | 0 | Incomplete             | 1                                      | Unverified | 2                      | Complete                          |    |                        |                                     |        |                        |                                                                       |   |                        |                                                                           |                      |                         |                   |
| 0                                                                  | Incomplete                                    |                                                                                                                              |                                                                                                                                                                                                                                                                                                                                                                                                                                                                                                                                                                                                                                                                                                    |   |                        |                                        |            |                        |                                   |    |                        |                                     |        |                        |                                                                       |   |                        |                                                                           |                      |                         |                   |
| 1                                                                  | Unverified                                    |                                                                                                                              |                                                                                                                                                                                                                                                                                                                                                                                                                                                                                                                                                                                                                                                                                                    |   |                        |                                        |            |                        |                                   |    |                        |                                     |        |                        |                                                                       |   |                        |                                                                           |                      |                         |                   |
| 2                                                                  | Complete                                      |                                                                                                                              |                                                                                                                                                                                                                                                                                                                                                                                                                                                                                                                                                                                                                                                                                                    |   |                        |                                        |            |                        |                                   |    |                        |                                     |        |                        |                                                                       |   |                        |                                                                           |                      |                         |                   |
| Instrument: <b>Verbal Autopsy - Mother</b> (verbal_autopsy_mother) |                                               |                                                                                                                              |                                                                                                                                                                                                                                                                                                                                                                                                                                                                                                                                                                                                                                                                                                    |   |                        |                                        |            |                        |                                   |    |                        |                                     |        |                        |                                                                       |   |                        |                                                                           |                      |                         |                   |
| 298                                                                | [confirm_studyid_va_m]                        | Confirm Study ID                                                                                                             | text                                                                                                                                                                                                                                                                                                                                                                                                                                                                                                                                                                                                                                                                                               |   |                        |                                        |            |                        |                                   |    |                        |                                     |        |                        |                                                                       |   |                        |                                                                           |                      |                         |                   |
| 299                                                                | [date_va_m]                                   | Date of verbal autopsy:                                                                                                      | text (date_dmy)                                                                                                                                                                                                                                                                                                                                                                                                                                                                                                                                                                                                                                                                                    |   |                        |                                        |            |                        |                                   |    |                        |                                     |        |                        |                                                                       |   |                        |                                                                           |                      |                         |                   |
| 300                                                                | [id10007_m]                                   | Section Header: <i>Information on the respondent and background about interview</i><br>What is the sex of the VA respondent? | radio <table border="1"> <tr> <td>1</td> <td>Female</td> </tr> <tr> <td>2</td> <td>Male</td> </tr> <tr> <td>3</td> <td>Ambiguous/Intersex</td> </tr> </table>                                                                                                                                                                                                                                                                                                                                                                                                                                                                                                                                      | 1 | Female                 | 2                                      | Male       | 3                      | Ambiguous/Intersex                |    |                        |                                     |        |                        |                                                                       |   |                        |                                                                           |                      |                         |                   |
| 1                                                                  | Female                                        |                                                                                                                              |                                                                                                                                                                                                                                                                                                                                                                                                                                                                                                                                                                                                                                                                                                    |   |                        |                                        |            |                        |                                   |    |                        |                                     |        |                        |                                                                       |   |                        |                                                                           |                      |                         |                   |
| 2                                                                  | Male                                          |                                                                                                                              |                                                                                                                                                                                                                                                                                                                                                                                                                                                                                                                                                                                                                                                                                                    |   |                        |                                        |            |                        |                                   |    |                        |                                     |        |                        |                                                                       |   |                        |                                                                           |                      |                         |                   |
| 3                                                                  | Ambiguous/Intersex                            |                                                                                                                              |                                                                                                                                                                                                                                                                                                                                                                                                                                                                                                                                                                                                                                                                                                    |   |                        |                                        |            |                        |                                   |    |                        |                                     |        |                        |                                                                       |   |                        |                                                                           |                      |                         |                   |
| 301                                                                | [id10008_m]                                   | What is your/the respondent's relationship to the deceased?                                                                  | dropdown <table border="1"> <tr> <td>1</td> <td>Parent</td> </tr> <tr> <td>2</td> <td>Child</td> </tr> <tr> <td>3</td> <td>Other family member</td> </tr> <tr> <td>4</td> <td>Friend</td> </tr> <tr> <td>5</td> <td>Spouse</td> </tr> <tr> <td>6</td> <td>Health worker</td> </tr> <tr> <td>7</td> <td>Public official</td> </tr> <tr> <td>8</td> <td>Another relationship</td> </tr> <tr> <td>88</td> <td>Refused to answer</td> </tr> </table>                                                                                                                                                                                                                                                   | 1 | Parent                 | 2                                      | Child      | 3                      | Other family member               | 4  | Friend                 | 5                                   | Spouse | 6                      | Health worker                                                         | 7 | Public official        | 8                                                                         | Another relationship | 88                      | Refused to answer |
| 1                                                                  | Parent                                        |                                                                                                                              |                                                                                                                                                                                                                                                                                                                                                                                                                                                                                                                                                                                                                                                                                                    |   |                        |                                        |            |                        |                                   |    |                        |                                     |        |                        |                                                                       |   |                        |                                                                           |                      |                         |                   |
| 2                                                                  | Child                                         |                                                                                                                              |                                                                                                                                                                                                                                                                                                                                                                                                                                                                                                                                                                                                                                                                                                    |   |                        |                                        |            |                        |                                   |    |                        |                                     |        |                        |                                                                       |   |                        |                                                                           |                      |                         |                   |
| 3                                                                  | Other family member                           |                                                                                                                              |                                                                                                                                                                                                                                                                                                                                                                                                                                                                                                                                                                                                                                                                                                    |   |                        |                                        |            |                        |                                   |    |                        |                                     |        |                        |                                                                       |   |                        |                                                                           |                      |                         |                   |
| 4                                                                  | Friend                                        |                                                                                                                              |                                                                                                                                                                                                                                                                                                                                                                                                                                                                                                                                                                                                                                                                                                    |   |                        |                                        |            |                        |                                   |    |                        |                                     |        |                        |                                                                       |   |                        |                                                                           |                      |                         |                   |
| 5                                                                  | Spouse                                        |                                                                                                                              |                                                                                                                                                                                                                                                                                                                                                                                                                                                                                                                                                                                                                                                                                                    |   |                        |                                        |            |                        |                                   |    |                        |                                     |        |                        |                                                                       |   |                        |                                                                           |                      |                         |                   |
| 6                                                                  | Health worker                                 |                                                                                                                              |                                                                                                                                                                                                                                                                                                                                                                                                                                                                                                                                                                                                                                                                                                    |   |                        |                                        |            |                        |                                   |    |                        |                                     |        |                        |                                                                       |   |                        |                                                                           |                      |                         |                   |
| 7                                                                  | Public official                               |                                                                                                                              |                                                                                                                                                                                                                                                                                                                                                                                                                                                                                                                                                                                                                                                                                                    |   |                        |                                        |            |                        |                                   |    |                        |                                     |        |                        |                                                                       |   |                        |                                                                           |                      |                         |                   |
| 8                                                                  | Another relationship                          |                                                                                                                              |                                                                                                                                                                                                                                                                                                                                                                                                                                                                                                                                                                                                                                                                                                    |   |                        |                                        |            |                        |                                   |    |                        |                                     |        |                        |                                                                       |   |                        |                                                                           |                      |                         |                   |
| 88                                                                 | Refused to answer                             |                                                                                                                              |                                                                                                                                                                                                                                                                                                                                                                                                                                                                                                                                                                                                                                                                                                    |   |                        |                                        |            |                        |                                   |    |                        |                                     |        |                        |                                                                       |   |                        |                                                                           |                      |                         |                   |
| 302                                                                | [id10009_m]                                   | Did you/the respondent live with the deceased in the period leading to her death?                                            | radio <table border="1"> <tr> <td>1</td> <td>Yes</td> </tr> <tr> <td>0</td> <td>No</td> </tr> <tr> <td>99</td> <td>Doesn't know</td> </tr> <tr> <td>88</td> <td>Refused to answer</td> </tr> </table>                                                                                                                                                                                                                                                                                                                                                                                                                                                                                              | 1 | Yes                    | 0                                      | No         | 99                     | Doesn't know                      | 88 | Refused to answer      |                                     |        |                        |                                                                       |   |                        |                                                                           |                      |                         |                   |
| 1                                                                  | Yes                                           |                                                                                                                              |                                                                                                                                                                                                                                                                                                                                                                                                                                                                                                                                                                                                                                                                                                    |   |                        |                                        |            |                        |                                   |    |                        |                                     |        |                        |                                                                       |   |                        |                                                                           |                      |                         |                   |
| 0                                                                  | No                                            |                                                                                                                              |                                                                                                                                                                                                                                                                                                                                                                                                                                                                                                                                                                                                                                                                                                    |   |                        |                                        |            |                        |                                   |    |                        |                                     |        |                        |                                                                       |   |                        |                                                                           |                      |                         |                   |
| 99                                                                 | Doesn't know                                  |                                                                                                                              |                                                                                                                                                                                                                                                                                                                                                                                                                                                                                                                                                                                                                                                                                                    |   |                        |                                        |            |                        |                                   |    |                        |                                     |        |                        |                                                                       |   |                        |                                                                           |                      |                         |                   |
| 88                                                                 | Refused to answer                             |                                                                                                                              |                                                                                                                                                                                                                                                                                                                                                                                                                                                                                                                                                                                                                                                                                                    |   |                        |                                        |            |                        |                                   |    |                        |                                     |        |                        |                                                                       |   |                        |                                                                           |                      |                         |                   |
| 303                                                                | [id10013_m]                                   | Did the respondent give consent?                                                                                             | radio <table border="1"> <tr> <td>1</td> <td>Yes</td> </tr> <tr> <td>0</td> <td>No</td> </tr> </table>                                                                                                                                                                                                                                                                                                                                                                                                                                                                                                                                                                                             | 1 | Yes                    | 0                                      | No         |                        |                                   |    |                        |                                     |        |                        |                                                                       |   |                        |                                                                           |                      |                         |                   |
| 1                                                                  | Yes                                           |                                                                                                                              |                                                                                                                                                                                                                                                                                                                                                                                                                                                                                                                                                                                                                                                                                                    |   |                        |                                        |            |                        |                                   |    |                        |                                     |        |                        |                                                                       |   |                        |                                                                           |                      |                         |                   |
| 0                                                                  | No                                            |                                                                                                                              |                                                                                                                                                                                                                                                                                                                                                                                                                                                                                                                                                                                                                                                                                                    |   |                        |                                        |            |                        |                                   |    |                        |                                     |        |                        |                                                                       |   |                        |                                                                           |                      |                         |                   |
| 304                                                                | [ageatdeath]                                  | Mother's age at death (in years):                                                                                            | calc<br>Calculation: <code>if([dischstat_mat] = '3' or [momalive_swf] = '0', if([dobknown_adm_v2]='1', (rounddown(datediff([momdeathdate_swf], [dob_adm_v2], 'y')), [dob_estage_adm_v2]), "</code>                                                                                                                                                                                                                                                                                                                                                                                                                                                                                                 |   |                        |                                        |            |                        |                                   |    |                        |                                     |        |                        |                                                                       |   |                        |                                                                           |                      |                         |                   |

|     |                                                                                     |                                                                                                                                                                                                                                                   |                                                                                                                                                                                                                                                                                                                                                                                                                      |   |                       |                                      |    |                       |               |    |                       |                                                           |    |                        |       |
|-----|-------------------------------------------------------------------------------------|---------------------------------------------------------------------------------------------------------------------------------------------------------------------------------------------------------------------------------------------------|----------------------------------------------------------------------------------------------------------------------------------------------------------------------------------------------------------------------------------------------------------------------------------------------------------------------------------------------------------------------------------------------------------------------|---|-----------------------|--------------------------------------|----|-----------------------|---------------|----|-----------------------|-----------------------------------------------------------|----|------------------------|-------|
| 305 | [id10487_m]                                                                         | Section Header: <i>You will now be filling in the questionnaire for an ADULT.</i><br>In the two weeks before death, did she live with or visit someone who had any COVID-19 symptoms or a positive COVID-19 test?                                 | radio<br><table border="1"> <tr><td>1</td><td>Yes</td></tr> <tr><td>0</td><td>No</td></tr> <tr><td>99</td><td>Doesn't know</td></tr> <tr><td>88</td><td>Refused to answer</td></tr> </table>                                                                                                                                                                                                                         | 1 | Yes                   | 0                                    | No | 99                    | Doesn't know  | 88 | Refused to answer     |                                                           |    |                        |       |
| 1   | Yes                                                                                 |                                                                                                                                                                                                                                                   |                                                                                                                                                                                                                                                                                                                                                                                                                      |   |                       |                                      |    |                       |               |    |                       |                                                           |    |                        |       |
| 0   | No                                                                                  |                                                                                                                                                                                                                                                   |                                                                                                                                                                                                                                                                                                                                                                                                                      |   |                       |                                      |    |                       |               |    |                       |                                                           |    |                        |       |
| 99  | Doesn't know                                                                        |                                                                                                                                                                                                                                                   |                                                                                                                                                                                                                                                                                                                                                                                                                      |   |                       |                                      |    |                       |               |    |                       |                                                           |    |                        |       |
| 88  | Refused to answer                                                                   |                                                                                                                                                                                                                                                   |                                                                                                                                                                                                                                                                                                                                                                                                                      |   |                       |                                      |    |                       |               |    |                       |                                                           |    |                        |       |
| 306 | [id10488_m]                                                                         | In the two weeks before death, did she travel to an area where COVID-19 is known to be present?<br><i>Based on self-report of the respondent. If there is doubt, note the location in the narrative and check with the respective supervisor.</i> | radio<br><table border="1"> <tr><td>1</td><td>Yes</td></tr> <tr><td>0</td><td>No</td></tr> <tr><td>99</td><td>Doesn't know</td></tr> <tr><td>88</td><td>Refused to answer</td></tr> </table>                                                                                                                                                                                                                         | 1 | Yes                   | 0                                    | No | 99                    | Doesn't know  | 88 | Refused to answer     |                                                           |    |                        |       |
| 1   | Yes                                                                                 |                                                                                                                                                                                                                                                   |                                                                                                                                                                                                                                                                                                                                                                                                                      |   |                       |                                      |    |                       |               |    |                       |                                                           |    |                        |       |
| 0   | No                                                                                  |                                                                                                                                                                                                                                                   |                                                                                                                                                                                                                                                                                                                                                                                                                      |   |                       |                                      |    |                       |               |    |                       |                                                           |    |                        |       |
| 99  | Doesn't know                                                                        |                                                                                                                                                                                                                                                   |                                                                                                                                                                                                                                                                                                                                                                                                                      |   |                       |                                      |    |                       |               |    |                       |                                                           |    |                        |       |
| 88  | Refused to answer                                                                   |                                                                                                                                                                                                                                                   |                                                                                                                                                                                                                                                                                                                                                                                                                      |   |                       |                                      |    |                       |               |    |                       |                                                           |    |                        |       |
| 307 | [momadmit_va]<br>Show the field ONLY if: [dischstat_mat] != '3'                     | Section Header: <i>Health seeking/readmissions</i><br>Was the mother admitted for one or more nights at a facility for any reason after being home post-delivery?                                                                                 | yesno<br><table border="1"> <tr><td>1</td><td>Yes</td></tr> <tr><td>0</td><td>No</td></tr> </table>                                                                                                                                                                                                                                                                                                                  | 1 | Yes                   | 0                                    | No |                       |               |    |                       |                                                           |    |                        |       |
| 1   | Yes                                                                                 |                                                                                                                                                                                                                                                   |                                                                                                                                                                                                                                                                                                                                                                                                                      |   |                       |                                      |    |                       |               |    |                       |                                                           |    |                        |       |
| 0   | No                                                                                  |                                                                                                                                                                                                                                                   |                                                                                                                                                                                                                                                                                                                                                                                                                      |   |                       |                                      |    |                       |               |    |                       |                                                           |    |                        |       |
| 308 | [nummomadmit_va]<br>Show the field ONLY if: [momadmit_va] = '1'                     | How many times was the mother admitted in the first 6 weeks after delivery?                                                                                                                                                                       | dropdown<br><table border="1"> <tr><td>1</td><td>1</td></tr> <tr><td>2</td><td>2</td></tr> <tr><td>3</td><td>3</td></tr> <tr><td>4</td><td>&gt;3</td></tr> </table>                                                                                                                                                                                                                                                  | 1 | 1                     | 2                                    | 2  | 3                     | 3             | 4  | >3                    |                                                           |    |                        |       |
| 1   | 1                                                                                   |                                                                                                                                                                                                                                                   |                                                                                                                                                                                                                                                                                                                                                                                                                      |   |                       |                                      |    |                       |               |    |                       |                                                           |    |                        |       |
| 2   | 2                                                                                   |                                                                                                                                                                                                                                                   |                                                                                                                                                                                                                                                                                                                                                                                                                      |   |                       |                                      |    |                       |               |    |                       |                                                           |    |                        |       |
| 3   | 3                                                                                   |                                                                                                                                                                                                                                                   |                                                                                                                                                                                                                                                                                                                                                                                                                      |   |                       |                                      |    |                       |               |    |                       |                                                           |    |                        |       |
| 4   | >3                                                                                  |                                                                                                                                                                                                                                                   |                                                                                                                                                                                                                                                                                                                                                                                                                      |   |                       |                                      |    |                       |               |    |                       |                                                           |    |                        |       |
| 309 | [momadmitdate_va]<br>Show the field ONLY if: [momadmit_va] = '1'                    | Date of first admission                                                                                                                                                                                                                           | text (date_dmy)                                                                                                                                                                                                                                                                                                                                                                                                      |   |                       |                                      |    |                       |               |    |                       |                                                           |    |                        |       |
| 310 | [momnightsadm_va]<br>Show the field ONLY if: [momadmit_va] = '1'                    | For how many nights was she admitted?                                                                                                                                                                                                             | text (integer, Min: 1)                                                                                                                                                                                                                                                                                                                                                                                               |   |                       |                                      |    |                       |               |    |                       |                                                           |    |                        |       |
| 311 | [momadmitpathway_va]<br>Show the field ONLY if: [momadmit_va] = '1'                 | What was the care-seeking pathway to the first admission?                                                                                                                                                                                         | checkbox<br><table border="1"> <tr> <td>1</td> <td>momadmitpathway_va__1</td> <td>Routine PNC visit identified problem</td> </tr> <tr> <td>2</td> <td>momadmitpathway_va__2</td> <td>Self referral</td> </tr> <tr> <td>3</td> <td>momadmitpathway_va__3</td> <td>Both self-referral and PNC visit resulted in care seeking</td> </tr> <tr> <td>98</td> <td>momadmitpathway_va__98</td> <td>Other</td> </tr> </table> | 1 | momadmitpathway_va__1 | Routine PNC visit identified problem | 2  | momadmitpathway_va__2 | Self referral | 3  | momadmitpathway_va__3 | Both self-referral and PNC visit resulted in care seeking | 98 | momadmitpathway_va__98 | Other |
| 1   | momadmitpathway_va__1                                                               | Routine PNC visit identified problem                                                                                                                                                                                                              |                                                                                                                                                                                                                                                                                                                                                                                                                      |   |                       |                                      |    |                       |               |    |                       |                                                           |    |                        |       |
| 2   | momadmitpathway_va__2                                                               | Self referral                                                                                                                                                                                                                                     |                                                                                                                                                                                                                                                                                                                                                                                                                      |   |                       |                                      |    |                       |               |    |                       |                                                           |    |                        |       |
| 3   | momadmitpathway_va__3                                                               | Both self-referral and PNC visit resulted in care seeking                                                                                                                                                                                         |                                                                                                                                                                                                                                                                                                                                                                                                                      |   |                       |                                      |    |                       |               |    |                       |                                                           |    |                        |       |
| 98  | momadmitpathway_va__98                                                              | Other                                                                                                                                                                                                                                             |                                                                                                                                                                                                                                                                                                                                                                                                                      |   |                       |                                      |    |                       |               |    |                       |                                                           |    |                        |       |
| 312 | [momadmitpathwayother_va]<br>Show the field ONLY if: [momadmitpathway_va(98)] = '1' | Other pathway:                                                                                                                                                                                                                                    | text                                                                                                                                                                                                                                                                                                                                                                                                                 |   |                       |                                      |    |                       |               |    |                       |                                                           |    |                        |       |

| 313      | [momadmitsymp_va]<br>Show the field ONLY if:<br>[momadmit_va] = '1'              | What were the symptoms she experienced during this illness? (check all that apply) | <table border="1"> <thead> <tr> <th colspan="3">checkbox</th> </tr> </thead> <tbody> <tr> <td>1</td> <td>momadmitsymp_va__1</td> <td>Heavy vaginal bleeding</td> </tr> <tr> <td>2</td> <td>momadmitsymp_va__2</td> <td>Bleeding from nose/ eyes/ ears</td> </tr> <tr> <td>3</td> <td>momadmitsymp_va__3</td> <td>Petechiae (small red dots and bruises across the skin)</td> </tr> <tr> <td>4</td> <td>momadmitsymp_va__4</td> <td>Abnormal tiredness</td> </tr> <tr> <td>5</td> <td>momadmitsymp_va__5</td> <td>Convulsions</td> </tr> <tr> <td>6</td> <td>momadmitsymp_va__6</td> <td>Shortness of breath</td> </tr> <tr> <td>7</td> <td>momadmitsymp_va__7</td> <td>Changes in vision</td> </tr> <tr> <td>8</td> <td>momadmitsymp_va__8</td> <td>Severe headache &lt; 24 hrs</td> </tr> <tr> <td>9</td> <td>momadmitsymp_va__9</td> <td>Severe headache &gt;24 hrs</td> </tr> <tr> <td>10</td> <td>momadmitsymp_va__10</td> <td>Abdominal pain</td> </tr> <tr> <td>11</td> <td>momadmitsymp_va__11</td> <td>Abdominal tenderness when touched</td> </tr> <tr> <td>12</td> <td>momadmitsymp_va__12</td> <td>Foul smelling vaginal discharge</td> </tr> <tr> <td>13</td> <td>momadmitsymp_va__13</td> <td>Fever/ body hotness &lt; 7days</td> </tr> <tr> <td>14</td> <td>momadmitsymp_va__14</td> <td>Fever/ body hotness &gt;7days</td> </tr> <tr> <td>15</td> <td>momadmitsymp_va__15</td> <td>Diarrhea &lt; 14 days</td> </tr> <tr> <td>16</td> <td>momadmitsymp_va__16</td> <td>Diarrhea &gt;14 days</td> </tr> <tr> <td>17</td> <td>momadmitsymp_va__17</td> <td>Vomiting everything</td> </tr> <tr> <td>18</td> <td>momadmitsymp_va__18</td> <td>Cough &lt; 14 days</td> </tr> <tr> <td>19</td> <td>momadmitsymp_va__19</td> <td>Cough &gt;14 days</td> </tr> <tr> <td>20</td> <td>momadmitsymp_va__20</td> <td>Yellow eyes</td> </tr> <tr> <td>21</td> <td>momadmitsymp_va__21</td> <td>Loss of consciousness</td> </tr> <tr> <td>98</td> <td>momadmitsymp_va__98</td> <td>Other (specify)</td> </tr> <tr> <td>99</td> <td>momadmitsymp_va__99</td> <td>None</td> </tr> </tbody> </table> | checkbox |  |  | 1 | momadmitsymp_va__1 | Heavy vaginal bleeding | 2 | momadmitsymp_va__2 | Bleeding from nose/ eyes/ ears | 3 | momadmitsymp_va__3 | Petechiae (small red dots and bruises across the skin) | 4 | momadmitsymp_va__4 | Abnormal tiredness | 5 | momadmitsymp_va__5 | Convulsions | 6 | momadmitsymp_va__6 | Shortness of breath | 7 | momadmitsymp_va__7 | Changes in vision | 8 | momadmitsymp_va__8 | Severe headache < 24 hrs | 9 | momadmitsymp_va__9 | Severe headache >24 hrs | 10 | momadmitsymp_va__10 | Abdominal pain | 11 | momadmitsymp_va__11 | Abdominal tenderness when touched | 12 | momadmitsymp_va__12 | Foul smelling vaginal discharge | 13 | momadmitsymp_va__13 | Fever/ body hotness < 7days | 14 | momadmitsymp_va__14 | Fever/ body hotness >7days | 15 | momadmitsymp_va__15 | Diarrhea < 14 days | 16 | momadmitsymp_va__16 | Diarrhea >14 days | 17 | momadmitsymp_va__17 | Vomiting everything | 18 | momadmitsymp_va__18 | Cough < 14 days | 19 | momadmitsymp_va__19 | Cough >14 days | 20 | momadmitsymp_va__20 | Yellow eyes | 21 | momadmitsymp_va__21 | Loss of consciousness | 98 | momadmitsymp_va__98 | Other (specify) | 99 | momadmitsymp_va__99 | None |
|----------|----------------------------------------------------------------------------------|------------------------------------------------------------------------------------|---------------------------------------------------------------------------------------------------------------------------------------------------------------------------------------------------------------------------------------------------------------------------------------------------------------------------------------------------------------------------------------------------------------------------------------------------------------------------------------------------------------------------------------------------------------------------------------------------------------------------------------------------------------------------------------------------------------------------------------------------------------------------------------------------------------------------------------------------------------------------------------------------------------------------------------------------------------------------------------------------------------------------------------------------------------------------------------------------------------------------------------------------------------------------------------------------------------------------------------------------------------------------------------------------------------------------------------------------------------------------------------------------------------------------------------------------------------------------------------------------------------------------------------------------------------------------------------------------------------------------------------------------------------------------------------------------------------------------------------------------------------------------------------------------------------------------------------------------------------------------------------------------------------------------------------------------------------------------------------------------------------------------------------------------------------------------------------------------|----------|--|--|---|--------------------|------------------------|---|--------------------|--------------------------------|---|--------------------|--------------------------------------------------------|---|--------------------|--------------------|---|--------------------|-------------|---|--------------------|---------------------|---|--------------------|-------------------|---|--------------------|--------------------------|---|--------------------|-------------------------|----|---------------------|----------------|----|---------------------|-----------------------------------|----|---------------------|---------------------------------|----|---------------------|-----------------------------|----|---------------------|----------------------------|----|---------------------|--------------------|----|---------------------|-------------------|----|---------------------|---------------------|----|---------------------|-----------------|----|---------------------|----------------|----|---------------------|-------------|----|---------------------|-----------------------|----|---------------------|-----------------|----|---------------------|------|
| checkbox |                                                                                  |                                                                                    |                                                                                                                                                                                                                                                                                                                                                                                                                                                                                                                                                                                                                                                                                                                                                                                                                                                                                                                                                                                                                                                                                                                                                                                                                                                                                                                                                                                                                                                                                                                                                                                                                                                                                                                                                                                                                                                                                                                                                                                                                                                                                                   |          |  |  |   |                    |                        |   |                    |                                |   |                    |                                                        |   |                    |                    |   |                    |             |   |                    |                     |   |                    |                   |   |                    |                          |   |                    |                         |    |                     |                |    |                     |                                   |    |                     |                                 |    |                     |                             |    |                     |                            |    |                     |                    |    |                     |                   |    |                     |                     |    |                     |                 |    |                     |                |    |                     |             |    |                     |                       |    |                     |                 |    |                     |      |
| 1        | momadmitsymp_va__1                                                               | Heavy vaginal bleeding                                                             |                                                                                                                                                                                                                                                                                                                                                                                                                                                                                                                                                                                                                                                                                                                                                                                                                                                                                                                                                                                                                                                                                                                                                                                                                                                                                                                                                                                                                                                                                                                                                                                                                                                                                                                                                                                                                                                                                                                                                                                                                                                                                                   |          |  |  |   |                    |                        |   |                    |                                |   |                    |                                                        |   |                    |                    |   |                    |             |   |                    |                     |   |                    |                   |   |                    |                          |   |                    |                         |    |                     |                |    |                     |                                   |    |                     |                                 |    |                     |                             |    |                     |                            |    |                     |                    |    |                     |                   |    |                     |                     |    |                     |                 |    |                     |                |    |                     |             |    |                     |                       |    |                     |                 |    |                     |      |
| 2        | momadmitsymp_va__2                                                               | Bleeding from nose/ eyes/ ears                                                     |                                                                                                                                                                                                                                                                                                                                                                                                                                                                                                                                                                                                                                                                                                                                                                                                                                                                                                                                                                                                                                                                                                                                                                                                                                                                                                                                                                                                                                                                                                                                                                                                                                                                                                                                                                                                                                                                                                                                                                                                                                                                                                   |          |  |  |   |                    |                        |   |                    |                                |   |                    |                                                        |   |                    |                    |   |                    |             |   |                    |                     |   |                    |                   |   |                    |                          |   |                    |                         |    |                     |                |    |                     |                                   |    |                     |                                 |    |                     |                             |    |                     |                            |    |                     |                    |    |                     |                   |    |                     |                     |    |                     |                 |    |                     |                |    |                     |             |    |                     |                       |    |                     |                 |    |                     |      |
| 3        | momadmitsymp_va__3                                                               | Petechiae (small red dots and bruises across the skin)                             |                                                                                                                                                                                                                                                                                                                                                                                                                                                                                                                                                                                                                                                                                                                                                                                                                                                                                                                                                                                                                                                                                                                                                                                                                                                                                                                                                                                                                                                                                                                                                                                                                                                                                                                                                                                                                                                                                                                                                                                                                                                                                                   |          |  |  |   |                    |                        |   |                    |                                |   |                    |                                                        |   |                    |                    |   |                    |             |   |                    |                     |   |                    |                   |   |                    |                          |   |                    |                         |    |                     |                |    |                     |                                   |    |                     |                                 |    |                     |                             |    |                     |                            |    |                     |                    |    |                     |                   |    |                     |                     |    |                     |                 |    |                     |                |    |                     |             |    |                     |                       |    |                     |                 |    |                     |      |
| 4        | momadmitsymp_va__4                                                               | Abnormal tiredness                                                                 |                                                                                                                                                                                                                                                                                                                                                                                                                                                                                                                                                                                                                                                                                                                                                                                                                                                                                                                                                                                                                                                                                                                                                                                                                                                                                                                                                                                                                                                                                                                                                                                                                                                                                                                                                                                                                                                                                                                                                                                                                                                                                                   |          |  |  |   |                    |                        |   |                    |                                |   |                    |                                                        |   |                    |                    |   |                    |             |   |                    |                     |   |                    |                   |   |                    |                          |   |                    |                         |    |                     |                |    |                     |                                   |    |                     |                                 |    |                     |                             |    |                     |                            |    |                     |                    |    |                     |                   |    |                     |                     |    |                     |                 |    |                     |                |    |                     |             |    |                     |                       |    |                     |                 |    |                     |      |
| 5        | momadmitsymp_va__5                                                               | Convulsions                                                                        |                                                                                                                                                                                                                                                                                                                                                                                                                                                                                                                                                                                                                                                                                                                                                                                                                                                                                                                                                                                                                                                                                                                                                                                                                                                                                                                                                                                                                                                                                                                                                                                                                                                                                                                                                                                                                                                                                                                                                                                                                                                                                                   |          |  |  |   |                    |                        |   |                    |                                |   |                    |                                                        |   |                    |                    |   |                    |             |   |                    |                     |   |                    |                   |   |                    |                          |   |                    |                         |    |                     |                |    |                     |                                   |    |                     |                                 |    |                     |                             |    |                     |                            |    |                     |                    |    |                     |                   |    |                     |                     |    |                     |                 |    |                     |                |    |                     |             |    |                     |                       |    |                     |                 |    |                     |      |
| 6        | momadmitsymp_va__6                                                               | Shortness of breath                                                                |                                                                                                                                                                                                                                                                                                                                                                                                                                                                                                                                                                                                                                                                                                                                                                                                                                                                                                                                                                                                                                                                                                                                                                                                                                                                                                                                                                                                                                                                                                                                                                                                                                                                                                                                                                                                                                                                                                                                                                                                                                                                                                   |          |  |  |   |                    |                        |   |                    |                                |   |                    |                                                        |   |                    |                    |   |                    |             |   |                    |                     |   |                    |                   |   |                    |                          |   |                    |                         |    |                     |                |    |                     |                                   |    |                     |                                 |    |                     |                             |    |                     |                            |    |                     |                    |    |                     |                   |    |                     |                     |    |                     |                 |    |                     |                |    |                     |             |    |                     |                       |    |                     |                 |    |                     |      |
| 7        | momadmitsymp_va__7                                                               | Changes in vision                                                                  |                                                                                                                                                                                                                                                                                                                                                                                                                                                                                                                                                                                                                                                                                                                                                                                                                                                                                                                                                                                                                                                                                                                                                                                                                                                                                                                                                                                                                                                                                                                                                                                                                                                                                                                                                                                                                                                                                                                                                                                                                                                                                                   |          |  |  |   |                    |                        |   |                    |                                |   |                    |                                                        |   |                    |                    |   |                    |             |   |                    |                     |   |                    |                   |   |                    |                          |   |                    |                         |    |                     |                |    |                     |                                   |    |                     |                                 |    |                     |                             |    |                     |                            |    |                     |                    |    |                     |                   |    |                     |                     |    |                     |                 |    |                     |                |    |                     |             |    |                     |                       |    |                     |                 |    |                     |      |
| 8        | momadmitsymp_va__8                                                               | Severe headache < 24 hrs                                                           |                                                                                                                                                                                                                                                                                                                                                                                                                                                                                                                                                                                                                                                                                                                                                                                                                                                                                                                                                                                                                                                                                                                                                                                                                                                                                                                                                                                                                                                                                                                                                                                                                                                                                                                                                                                                                                                                                                                                                                                                                                                                                                   |          |  |  |   |                    |                        |   |                    |                                |   |                    |                                                        |   |                    |                    |   |                    |             |   |                    |                     |   |                    |                   |   |                    |                          |   |                    |                         |    |                     |                |    |                     |                                   |    |                     |                                 |    |                     |                             |    |                     |                            |    |                     |                    |    |                     |                   |    |                     |                     |    |                     |                 |    |                     |                |    |                     |             |    |                     |                       |    |                     |                 |    |                     |      |
| 9        | momadmitsymp_va__9                                                               | Severe headache >24 hrs                                                            |                                                                                                                                                                                                                                                                                                                                                                                                                                                                                                                                                                                                                                                                                                                                                                                                                                                                                                                                                                                                                                                                                                                                                                                                                                                                                                                                                                                                                                                                                                                                                                                                                                                                                                                                                                                                                                                                                                                                                                                                                                                                                                   |          |  |  |   |                    |                        |   |                    |                                |   |                    |                                                        |   |                    |                    |   |                    |             |   |                    |                     |   |                    |                   |   |                    |                          |   |                    |                         |    |                     |                |    |                     |                                   |    |                     |                                 |    |                     |                             |    |                     |                            |    |                     |                    |    |                     |                   |    |                     |                     |    |                     |                 |    |                     |                |    |                     |             |    |                     |                       |    |                     |                 |    |                     |      |
| 10       | momadmitsymp_va__10                                                              | Abdominal pain                                                                     |                                                                                                                                                                                                                                                                                                                                                                                                                                                                                                                                                                                                                                                                                                                                                                                                                                                                                                                                                                                                                                                                                                                                                                                                                                                                                                                                                                                                                                                                                                                                                                                                                                                                                                                                                                                                                                                                                                                                                                                                                                                                                                   |          |  |  |   |                    |                        |   |                    |                                |   |                    |                                                        |   |                    |                    |   |                    |             |   |                    |                     |   |                    |                   |   |                    |                          |   |                    |                         |    |                     |                |    |                     |                                   |    |                     |                                 |    |                     |                             |    |                     |                            |    |                     |                    |    |                     |                   |    |                     |                     |    |                     |                 |    |                     |                |    |                     |             |    |                     |                       |    |                     |                 |    |                     |      |
| 11       | momadmitsymp_va__11                                                              | Abdominal tenderness when touched                                                  |                                                                                                                                                                                                                                                                                                                                                                                                                                                                                                                                                                                                                                                                                                                                                                                                                                                                                                                                                                                                                                                                                                                                                                                                                                                                                                                                                                                                                                                                                                                                                                                                                                                                                                                                                                                                                                                                                                                                                                                                                                                                                                   |          |  |  |   |                    |                        |   |                    |                                |   |                    |                                                        |   |                    |                    |   |                    |             |   |                    |                     |   |                    |                   |   |                    |                          |   |                    |                         |    |                     |                |    |                     |                                   |    |                     |                                 |    |                     |                             |    |                     |                            |    |                     |                    |    |                     |                   |    |                     |                     |    |                     |                 |    |                     |                |    |                     |             |    |                     |                       |    |                     |                 |    |                     |      |
| 12       | momadmitsymp_va__12                                                              | Foul smelling vaginal discharge                                                    |                                                                                                                                                                                                                                                                                                                                                                                                                                                                                                                                                                                                                                                                                                                                                                                                                                                                                                                                                                                                                                                                                                                                                                                                                                                                                                                                                                                                                                                                                                                                                                                                                                                                                                                                                                                                                                                                                                                                                                                                                                                                                                   |          |  |  |   |                    |                        |   |                    |                                |   |                    |                                                        |   |                    |                    |   |                    |             |   |                    |                     |   |                    |                   |   |                    |                          |   |                    |                         |    |                     |                |    |                     |                                   |    |                     |                                 |    |                     |                             |    |                     |                            |    |                     |                    |    |                     |                   |    |                     |                     |    |                     |                 |    |                     |                |    |                     |             |    |                     |                       |    |                     |                 |    |                     |      |
| 13       | momadmitsymp_va__13                                                              | Fever/ body hotness < 7days                                                        |                                                                                                                                                                                                                                                                                                                                                                                                                                                                                                                                                                                                                                                                                                                                                                                                                                                                                                                                                                                                                                                                                                                                                                                                                                                                                                                                                                                                                                                                                                                                                                                                                                                                                                                                                                                                                                                                                                                                                                                                                                                                                                   |          |  |  |   |                    |                        |   |                    |                                |   |                    |                                                        |   |                    |                    |   |                    |             |   |                    |                     |   |                    |                   |   |                    |                          |   |                    |                         |    |                     |                |    |                     |                                   |    |                     |                                 |    |                     |                             |    |                     |                            |    |                     |                    |    |                     |                   |    |                     |                     |    |                     |                 |    |                     |                |    |                     |             |    |                     |                       |    |                     |                 |    |                     |      |
| 14       | momadmitsymp_va__14                                                              | Fever/ body hotness >7days                                                         |                                                                                                                                                                                                                                                                                                                                                                                                                                                                                                                                                                                                                                                                                                                                                                                                                                                                                                                                                                                                                                                                                                                                                                                                                                                                                                                                                                                                                                                                                                                                                                                                                                                                                                                                                                                                                                                                                                                                                                                                                                                                                                   |          |  |  |   |                    |                        |   |                    |                                |   |                    |                                                        |   |                    |                    |   |                    |             |   |                    |                     |   |                    |                   |   |                    |                          |   |                    |                         |    |                     |                |    |                     |                                   |    |                     |                                 |    |                     |                             |    |                     |                            |    |                     |                    |    |                     |                   |    |                     |                     |    |                     |                 |    |                     |                |    |                     |             |    |                     |                       |    |                     |                 |    |                     |      |
| 15       | momadmitsymp_va__15                                                              | Diarrhea < 14 days                                                                 |                                                                                                                                                                                                                                                                                                                                                                                                                                                                                                                                                                                                                                                                                                                                                                                                                                                                                                                                                                                                                                                                                                                                                                                                                                                                                                                                                                                                                                                                                                                                                                                                                                                                                                                                                                                                                                                                                                                                                                                                                                                                                                   |          |  |  |   |                    |                        |   |                    |                                |   |                    |                                                        |   |                    |                    |   |                    |             |   |                    |                     |   |                    |                   |   |                    |                          |   |                    |                         |    |                     |                |    |                     |                                   |    |                     |                                 |    |                     |                             |    |                     |                            |    |                     |                    |    |                     |                   |    |                     |                     |    |                     |                 |    |                     |                |    |                     |             |    |                     |                       |    |                     |                 |    |                     |      |
| 16       | momadmitsymp_va__16                                                              | Diarrhea >14 days                                                                  |                                                                                                                                                                                                                                                                                                                                                                                                                                                                                                                                                                                                                                                                                                                                                                                                                                                                                                                                                                                                                                                                                                                                                                                                                                                                                                                                                                                                                                                                                                                                                                                                                                                                                                                                                                                                                                                                                                                                                                                                                                                                                                   |          |  |  |   |                    |                        |   |                    |                                |   |                    |                                                        |   |                    |                    |   |                    |             |   |                    |                     |   |                    |                   |   |                    |                          |   |                    |                         |    |                     |                |    |                     |                                   |    |                     |                                 |    |                     |                             |    |                     |                            |    |                     |                    |    |                     |                   |    |                     |                     |    |                     |                 |    |                     |                |    |                     |             |    |                     |                       |    |                     |                 |    |                     |      |
| 17       | momadmitsymp_va__17                                                              | Vomiting everything                                                                |                                                                                                                                                                                                                                                                                                                                                                                                                                                                                                                                                                                                                                                                                                                                                                                                                                                                                                                                                                                                                                                                                                                                                                                                                                                                                                                                                                                                                                                                                                                                                                                                                                                                                                                                                                                                                                                                                                                                                                                                                                                                                                   |          |  |  |   |                    |                        |   |                    |                                |   |                    |                                                        |   |                    |                    |   |                    |             |   |                    |                     |   |                    |                   |   |                    |                          |   |                    |                         |    |                     |                |    |                     |                                   |    |                     |                                 |    |                     |                             |    |                     |                            |    |                     |                    |    |                     |                   |    |                     |                     |    |                     |                 |    |                     |                |    |                     |             |    |                     |                       |    |                     |                 |    |                     |      |
| 18       | momadmitsymp_va__18                                                              | Cough < 14 days                                                                    |                                                                                                                                                                                                                                                                                                                                                                                                                                                                                                                                                                                                                                                                                                                                                                                                                                                                                                                                                                                                                                                                                                                                                                                                                                                                                                                                                                                                                                                                                                                                                                                                                                                                                                                                                                                                                                                                                                                                                                                                                                                                                                   |          |  |  |   |                    |                        |   |                    |                                |   |                    |                                                        |   |                    |                    |   |                    |             |   |                    |                     |   |                    |                   |   |                    |                          |   |                    |                         |    |                     |                |    |                     |                                   |    |                     |                                 |    |                     |                             |    |                     |                            |    |                     |                    |    |                     |                   |    |                     |                     |    |                     |                 |    |                     |                |    |                     |             |    |                     |                       |    |                     |                 |    |                     |      |
| 19       | momadmitsymp_va__19                                                              | Cough >14 days                                                                     |                                                                                                                                                                                                                                                                                                                                                                                                                                                                                                                                                                                                                                                                                                                                                                                                                                                                                                                                                                                                                                                                                                                                                                                                                                                                                                                                                                                                                                                                                                                                                                                                                                                                                                                                                                                                                                                                                                                                                                                                                                                                                                   |          |  |  |   |                    |                        |   |                    |                                |   |                    |                                                        |   |                    |                    |   |                    |             |   |                    |                     |   |                    |                   |   |                    |                          |   |                    |                         |    |                     |                |    |                     |                                   |    |                     |                                 |    |                     |                             |    |                     |                            |    |                     |                    |    |                     |                   |    |                     |                     |    |                     |                 |    |                     |                |    |                     |             |    |                     |                       |    |                     |                 |    |                     |      |
| 20       | momadmitsymp_va__20                                                              | Yellow eyes                                                                        |                                                                                                                                                                                                                                                                                                                                                                                                                                                                                                                                                                                                                                                                                                                                                                                                                                                                                                                                                                                                                                                                                                                                                                                                                                                                                                                                                                                                                                                                                                                                                                                                                                                                                                                                                                                                                                                                                                                                                                                                                                                                                                   |          |  |  |   |                    |                        |   |                    |                                |   |                    |                                                        |   |                    |                    |   |                    |             |   |                    |                     |   |                    |                   |   |                    |                          |   |                    |                         |    |                     |                |    |                     |                                   |    |                     |                                 |    |                     |                             |    |                     |                            |    |                     |                    |    |                     |                   |    |                     |                     |    |                     |                 |    |                     |                |    |                     |             |    |                     |                       |    |                     |                 |    |                     |      |
| 21       | momadmitsymp_va__21                                                              | Loss of consciousness                                                              |                                                                                                                                                                                                                                                                                                                                                                                                                                                                                                                                                                                                                                                                                                                                                                                                                                                                                                                                                                                                                                                                                                                                                                                                                                                                                                                                                                                                                                                                                                                                                                                                                                                                                                                                                                                                                                                                                                                                                                                                                                                                                                   |          |  |  |   |                    |                        |   |                    |                                |   |                    |                                                        |   |                    |                    |   |                    |             |   |                    |                     |   |                    |                   |   |                    |                          |   |                    |                         |    |                     |                |    |                     |                                   |    |                     |                                 |    |                     |                             |    |                     |                            |    |                     |                    |    |                     |                   |    |                     |                     |    |                     |                 |    |                     |                |    |                     |             |    |                     |                       |    |                     |                 |    |                     |      |
| 98       | momadmitsymp_va__98                                                              | Other (specify)                                                                    |                                                                                                                                                                                                                                                                                                                                                                                                                                                                                                                                                                                                                                                                                                                                                                                                                                                                                                                                                                                                                                                                                                                                                                                                                                                                                                                                                                                                                                                                                                                                                                                                                                                                                                                                                                                                                                                                                                                                                                                                                                                                                                   |          |  |  |   |                    |                        |   |                    |                                |   |                    |                                                        |   |                    |                    |   |                    |             |   |                    |                     |   |                    |                   |   |                    |                          |   |                    |                         |    |                     |                |    |                     |                                   |    |                     |                                 |    |                     |                             |    |                     |                            |    |                     |                    |    |                     |                   |    |                     |                     |    |                     |                 |    |                     |                |    |                     |             |    |                     |                       |    |                     |                 |    |                     |      |
| 99       | momadmitsymp_va__99                                                              | None                                                                               |                                                                                                                                                                                                                                                                                                                                                                                                                                                                                                                                                                                                                                                                                                                                                                                                                                                                                                                                                                                                                                                                                                                                                                                                                                                                                                                                                                                                                                                                                                                                                                                                                                                                                                                                                                                                                                                                                                                                                                                                                                                                                                   |          |  |  |   |                    |                        |   |                    |                                |   |                    |                                                        |   |                    |                    |   |                    |             |   |                    |                     |   |                    |                   |   |                    |                          |   |                    |                         |    |                     |                |    |                     |                                   |    |                     |                                 |    |                     |                             |    |                     |                            |    |                     |                    |    |                     |                   |    |                     |                     |    |                     |                 |    |                     |                |    |                     |             |    |                     |                       |    |                     |                 |    |                     |      |
| 314      | [momadmitsympother_va]<br>Show the field ONLY if:<br>[momadmitsymp_va(98)] = '1' | Other symptom                                                                      | text                                                                                                                                                                                                                                                                                                                                                                                                                                                                                                                                                                                                                                                                                                                                                                                                                                                                                                                                                                                                                                                                                                                                                                                                                                                                                                                                                                                                                                                                                                                                                                                                                                                                                                                                                                                                                                                                                                                                                                                                                                                                                              |          |  |  |   |                    |                        |   |                    |                                |   |                    |                                                        |   |                    |                    |   |                    |             |   |                    |                     |   |                    |                   |   |                    |                          |   |                    |                         |    |                     |                |    |                     |                                   |    |                     |                                 |    |                     |                             |    |                     |                            |    |                     |                    |    |                     |                   |    |                     |                     |    |                     |                 |    |                     |                |    |                     |             |    |                     |                       |    |                     |                 |    |                     |      |

|     |                                                                                      |                                                                                                                 |                                                                                                                                                                                                                                                                                                                                                                                                                                                                                                                                                                                                                                                                                                                                                                                                                                                                                                                                                                                                                                                                                                                                                                                                                                                                                                                                                                                                                                                                                                                               |   |                      |                                      |    |                      |               |   |                      |                                                           |    |                       |         |   |                    |                     |   |                    |         |   |                    |                   |   |                    |                |   |                    |        |    |                     |                         |    |                     |                  |    |                     |                 |    |                     |          |    |                     |          |    |                     |               |    |                     |                        |    |                     |                          |    |                     |               |    |                     |                 |    |                     |      |
|-----|--------------------------------------------------------------------------------------|-----------------------------------------------------------------------------------------------------------------|-------------------------------------------------------------------------------------------------------------------------------------------------------------------------------------------------------------------------------------------------------------------------------------------------------------------------------------------------------------------------------------------------------------------------------------------------------------------------------------------------------------------------------------------------------------------------------------------------------------------------------------------------------------------------------------------------------------------------------------------------------------------------------------------------------------------------------------------------------------------------------------------------------------------------------------------------------------------------------------------------------------------------------------------------------------------------------------------------------------------------------------------------------------------------------------------------------------------------------------------------------------------------------------------------------------------------------------------------------------------------------------------------------------------------------------------------------------------------------------------------------------------------------|---|----------------------|--------------------------------------|----|----------------------|---------------|---|----------------------|-----------------------------------------------------------|----|-----------------------|---------|---|--------------------|---------------------|---|--------------------|---------|---|--------------------|-------------------|---|--------------------|----------------|---|--------------------|--------|----|---------------------|-------------------------|----|---------------------|------------------|----|---------------------|-----------------|----|---------------------|----------|----|---------------------|----------|----|---------------------|---------------|----|---------------------|------------------------|----|---------------------|--------------------------|----|---------------------|---------------|----|---------------------|-----------------|----|---------------------|------|
| 315 | [momadmitcond_va]<br>Show the field ONLY if:<br>[momadmit_va] = '1'                  | Was she told she had any of the following conditions during this visit? (check all that apply)                  | checkbox <table border="1" data-bbox="1031 128 1508 938"> <tr><td>1</td><td>momadmitcond_va__1</td><td>Pre-eclampsia</td></tr> <tr><td>2</td><td>momadmitcond_va__2</td><td>Eclampsia</td></tr> <tr><td>3</td><td>momadmitcond_va__3</td><td>Diabetes</td></tr> <tr><td>4</td><td>momadmitcond_va__4</td><td>Fistula</td></tr> <tr><td>5</td><td>momadmitcond_va__5</td><td>HIV related illness</td></tr> <tr><td>6</td><td>momadmitcond_va__6</td><td>Malaria</td></tr> <tr><td>7</td><td>momadmitcond_va__7</td><td>Retained placenta</td></tr> <tr><td>8</td><td>momadmitcond_va__8</td><td>Heavy bleeding</td></tr> <tr><td>9</td><td>momadmitcond_va__9</td><td>Anemia</td></tr> <tr><td>10</td><td>momadmitcond_va__10</td><td>Surgical site infection</td></tr> <tr><td>11</td><td>momadmitcond_va__11</td><td>Puerperal sepsis</td></tr> <tr><td>12</td><td>momadmitcond_va__12</td><td>Other infection</td></tr> <tr><td>13</td><td>momadmitcond_va__13</td><td>Diarrhea</td></tr> <tr><td>14</td><td>momadmitcond_va__14</td><td>Vomiting</td></tr> <tr><td>15</td><td>momadmitcond_va__15</td><td>PPD/psychosis</td></tr> <tr><td>16</td><td>momadmitcond_va__16</td><td>Needed another surgery</td></tr> <tr><td>17</td><td>momadmitcond_va__17</td><td>Needed blood transfusion</td></tr> <tr><td>18</td><td>momadmitcond_va__18</td><td>Needed oxygen</td></tr> <tr><td>98</td><td>momadmitcond_va__98</td><td>Other (specify)</td></tr> <tr><td>99</td><td>momadmitcond_va__99</td><td>None</td></tr> </table> | 1 | momadmitcond_va__1   | Pre-eclampsia                        | 2  | momadmitcond_va__2   | Eclampsia     | 3 | momadmitcond_va__3   | Diabetes                                                  | 4  | momadmitcond_va__4    | Fistula | 5 | momadmitcond_va__5 | HIV related illness | 6 | momadmitcond_va__6 | Malaria | 7 | momadmitcond_va__7 | Retained placenta | 8 | momadmitcond_va__8 | Heavy bleeding | 9 | momadmitcond_va__9 | Anemia | 10 | momadmitcond_va__10 | Surgical site infection | 11 | momadmitcond_va__11 | Puerperal sepsis | 12 | momadmitcond_va__12 | Other infection | 13 | momadmitcond_va__13 | Diarrhea | 14 | momadmitcond_va__14 | Vomiting | 15 | momadmitcond_va__15 | PPD/psychosis | 16 | momadmitcond_va__16 | Needed another surgery | 17 | momadmitcond_va__17 | Needed blood transfusion | 18 | momadmitcond_va__18 | Needed oxygen | 98 | momadmitcond_va__98 | Other (specify) | 99 | momadmitcond_va__99 | None |
| 1   | momadmitcond_va__1                                                                   | Pre-eclampsia                                                                                                   |                                                                                                                                                                                                                                                                                                                                                                                                                                                                                                                                                                                                                                                                                                                                                                                                                                                                                                                                                                                                                                                                                                                                                                                                                                                                                                                                                                                                                                                                                                                               |   |                      |                                      |    |                      |               |   |                      |                                                           |    |                       |         |   |                    |                     |   |                    |         |   |                    |                   |   |                    |                |   |                    |        |    |                     |                         |    |                     |                  |    |                     |                 |    |                     |          |    |                     |          |    |                     |               |    |                     |                        |    |                     |                          |    |                     |               |    |                     |                 |    |                     |      |
| 2   | momadmitcond_va__2                                                                   | Eclampsia                                                                                                       |                                                                                                                                                                                                                                                                                                                                                                                                                                                                                                                                                                                                                                                                                                                                                                                                                                                                                                                                                                                                                                                                                                                                                                                                                                                                                                                                                                                                                                                                                                                               |   |                      |                                      |    |                      |               |   |                      |                                                           |    |                       |         |   |                    |                     |   |                    |         |   |                    |                   |   |                    |                |   |                    |        |    |                     |                         |    |                     |                  |    |                     |                 |    |                     |          |    |                     |          |    |                     |               |    |                     |                        |    |                     |                          |    |                     |               |    |                     |                 |    |                     |      |
| 3   | momadmitcond_va__3                                                                   | Diabetes                                                                                                        |                                                                                                                                                                                                                                                                                                                                                                                                                                                                                                                                                                                                                                                                                                                                                                                                                                                                                                                                                                                                                                                                                                                                                                                                                                                                                                                                                                                                                                                                                                                               |   |                      |                                      |    |                      |               |   |                      |                                                           |    |                       |         |   |                    |                     |   |                    |         |   |                    |                   |   |                    |                |   |                    |        |    |                     |                         |    |                     |                  |    |                     |                 |    |                     |          |    |                     |          |    |                     |               |    |                     |                        |    |                     |                          |    |                     |               |    |                     |                 |    |                     |      |
| 4   | momadmitcond_va__4                                                                   | Fistula                                                                                                         |                                                                                                                                                                                                                                                                                                                                                                                                                                                                                                                                                                                                                                                                                                                                                                                                                                                                                                                                                                                                                                                                                                                                                                                                                                                                                                                                                                                                                                                                                                                               |   |                      |                                      |    |                      |               |   |                      |                                                           |    |                       |         |   |                    |                     |   |                    |         |   |                    |                   |   |                    |                |   |                    |        |    |                     |                         |    |                     |                  |    |                     |                 |    |                     |          |    |                     |          |    |                     |               |    |                     |                        |    |                     |                          |    |                     |               |    |                     |                 |    |                     |      |
| 5   | momadmitcond_va__5                                                                   | HIV related illness                                                                                             |                                                                                                                                                                                                                                                                                                                                                                                                                                                                                                                                                                                                                                                                                                                                                                                                                                                                                                                                                                                                                                                                                                                                                                                                                                                                                                                                                                                                                                                                                                                               |   |                      |                                      |    |                      |               |   |                      |                                                           |    |                       |         |   |                    |                     |   |                    |         |   |                    |                   |   |                    |                |   |                    |        |    |                     |                         |    |                     |                  |    |                     |                 |    |                     |          |    |                     |          |    |                     |               |    |                     |                        |    |                     |                          |    |                     |               |    |                     |                 |    |                     |      |
| 6   | momadmitcond_va__6                                                                   | Malaria                                                                                                         |                                                                                                                                                                                                                                                                                                                                                                                                                                                                                                                                                                                                                                                                                                                                                                                                                                                                                                                                                                                                                                                                                                                                                                                                                                                                                                                                                                                                                                                                                                                               |   |                      |                                      |    |                      |               |   |                      |                                                           |    |                       |         |   |                    |                     |   |                    |         |   |                    |                   |   |                    |                |   |                    |        |    |                     |                         |    |                     |                  |    |                     |                 |    |                     |          |    |                     |          |    |                     |               |    |                     |                        |    |                     |                          |    |                     |               |    |                     |                 |    |                     |      |
| 7   | momadmitcond_va__7                                                                   | Retained placenta                                                                                               |                                                                                                                                                                                                                                                                                                                                                                                                                                                                                                                                                                                                                                                                                                                                                                                                                                                                                                                                                                                                                                                                                                                                                                                                                                                                                                                                                                                                                                                                                                                               |   |                      |                                      |    |                      |               |   |                      |                                                           |    |                       |         |   |                    |                     |   |                    |         |   |                    |                   |   |                    |                |   |                    |        |    |                     |                         |    |                     |                  |    |                     |                 |    |                     |          |    |                     |          |    |                     |               |    |                     |                        |    |                     |                          |    |                     |               |    |                     |                 |    |                     |      |
| 8   | momadmitcond_va__8                                                                   | Heavy bleeding                                                                                                  |                                                                                                                                                                                                                                                                                                                                                                                                                                                                                                                                                                                                                                                                                                                                                                                                                                                                                                                                                                                                                                                                                                                                                                                                                                                                                                                                                                                                                                                                                                                               |   |                      |                                      |    |                      |               |   |                      |                                                           |    |                       |         |   |                    |                     |   |                    |         |   |                    |                   |   |                    |                |   |                    |        |    |                     |                         |    |                     |                  |    |                     |                 |    |                     |          |    |                     |          |    |                     |               |    |                     |                        |    |                     |                          |    |                     |               |    |                     |                 |    |                     |      |
| 9   | momadmitcond_va__9                                                                   | Anemia                                                                                                          |                                                                                                                                                                                                                                                                                                                                                                                                                                                                                                                                                                                                                                                                                                                                                                                                                                                                                                                                                                                                                                                                                                                                                                                                                                                                                                                                                                                                                                                                                                                               |   |                      |                                      |    |                      |               |   |                      |                                                           |    |                       |         |   |                    |                     |   |                    |         |   |                    |                   |   |                    |                |   |                    |        |    |                     |                         |    |                     |                  |    |                     |                 |    |                     |          |    |                     |          |    |                     |               |    |                     |                        |    |                     |                          |    |                     |               |    |                     |                 |    |                     |      |
| 10  | momadmitcond_va__10                                                                  | Surgical site infection                                                                                         |                                                                                                                                                                                                                                                                                                                                                                                                                                                                                                                                                                                                                                                                                                                                                                                                                                                                                                                                                                                                                                                                                                                                                                                                                                                                                                                                                                                                                                                                                                                               |   |                      |                                      |    |                      |               |   |                      |                                                           |    |                       |         |   |                    |                     |   |                    |         |   |                    |                   |   |                    |                |   |                    |        |    |                     |                         |    |                     |                  |    |                     |                 |    |                     |          |    |                     |          |    |                     |               |    |                     |                        |    |                     |                          |    |                     |               |    |                     |                 |    |                     |      |
| 11  | momadmitcond_va__11                                                                  | Puerperal sepsis                                                                                                |                                                                                                                                                                                                                                                                                                                                                                                                                                                                                                                                                                                                                                                                                                                                                                                                                                                                                                                                                                                                                                                                                                                                                                                                                                                                                                                                                                                                                                                                                                                               |   |                      |                                      |    |                      |               |   |                      |                                                           |    |                       |         |   |                    |                     |   |                    |         |   |                    |                   |   |                    |                |   |                    |        |    |                     |                         |    |                     |                  |    |                     |                 |    |                     |          |    |                     |          |    |                     |               |    |                     |                        |    |                     |                          |    |                     |               |    |                     |                 |    |                     |      |
| 12  | momadmitcond_va__12                                                                  | Other infection                                                                                                 |                                                                                                                                                                                                                                                                                                                                                                                                                                                                                                                                                                                                                                                                                                                                                                                                                                                                                                                                                                                                                                                                                                                                                                                                                                                                                                                                                                                                                                                                                                                               |   |                      |                                      |    |                      |               |   |                      |                                                           |    |                       |         |   |                    |                     |   |                    |         |   |                    |                   |   |                    |                |   |                    |        |    |                     |                         |    |                     |                  |    |                     |                 |    |                     |          |    |                     |          |    |                     |               |    |                     |                        |    |                     |                          |    |                     |               |    |                     |                 |    |                     |      |
| 13  | momadmitcond_va__13                                                                  | Diarrhea                                                                                                        |                                                                                                                                                                                                                                                                                                                                                                                                                                                                                                                                                                                                                                                                                                                                                                                                                                                                                                                                                                                                                                                                                                                                                                                                                                                                                                                                                                                                                                                                                                                               |   |                      |                                      |    |                      |               |   |                      |                                                           |    |                       |         |   |                    |                     |   |                    |         |   |                    |                   |   |                    |                |   |                    |        |    |                     |                         |    |                     |                  |    |                     |                 |    |                     |          |    |                     |          |    |                     |               |    |                     |                        |    |                     |                          |    |                     |               |    |                     |                 |    |                     |      |
| 14  | momadmitcond_va__14                                                                  | Vomiting                                                                                                        |                                                                                                                                                                                                                                                                                                                                                                                                                                                                                                                                                                                                                                                                                                                                                                                                                                                                                                                                                                                                                                                                                                                                                                                                                                                                                                                                                                                                                                                                                                                               |   |                      |                                      |    |                      |               |   |                      |                                                           |    |                       |         |   |                    |                     |   |                    |         |   |                    |                   |   |                    |                |   |                    |        |    |                     |                         |    |                     |                  |    |                     |                 |    |                     |          |    |                     |          |    |                     |               |    |                     |                        |    |                     |                          |    |                     |               |    |                     |                 |    |                     |      |
| 15  | momadmitcond_va__15                                                                  | PPD/psychosis                                                                                                   |                                                                                                                                                                                                                                                                                                                                                                                                                                                                                                                                                                                                                                                                                                                                                                                                                                                                                                                                                                                                                                                                                                                                                                                                                                                                                                                                                                                                                                                                                                                               |   |                      |                                      |    |                      |               |   |                      |                                                           |    |                       |         |   |                    |                     |   |                    |         |   |                    |                   |   |                    |                |   |                    |        |    |                     |                         |    |                     |                  |    |                     |                 |    |                     |          |    |                     |          |    |                     |               |    |                     |                        |    |                     |                          |    |                     |               |    |                     |                 |    |                     |      |
| 16  | momadmitcond_va__16                                                                  | Needed another surgery                                                                                          |                                                                                                                                                                                                                                                                                                                                                                                                                                                                                                                                                                                                                                                                                                                                                                                                                                                                                                                                                                                                                                                                                                                                                                                                                                                                                                                                                                                                                                                                                                                               |   |                      |                                      |    |                      |               |   |                      |                                                           |    |                       |         |   |                    |                     |   |                    |         |   |                    |                   |   |                    |                |   |                    |        |    |                     |                         |    |                     |                  |    |                     |                 |    |                     |          |    |                     |          |    |                     |               |    |                     |                        |    |                     |                          |    |                     |               |    |                     |                 |    |                     |      |
| 17  | momadmitcond_va__17                                                                  | Needed blood transfusion                                                                                        |                                                                                                                                                                                                                                                                                                                                                                                                                                                                                                                                                                                                                                                                                                                                                                                                                                                                                                                                                                                                                                                                                                                                                                                                                                                                                                                                                                                                                                                                                                                               |   |                      |                                      |    |                      |               |   |                      |                                                           |    |                       |         |   |                    |                     |   |                    |         |   |                    |                   |   |                    |                |   |                    |        |    |                     |                         |    |                     |                  |    |                     |                 |    |                     |          |    |                     |          |    |                     |               |    |                     |                        |    |                     |                          |    |                     |               |    |                     |                 |    |                     |      |
| 18  | momadmitcond_va__18                                                                  | Needed oxygen                                                                                                   |                                                                                                                                                                                                                                                                                                                                                                                                                                                                                                                                                                                                                                                                                                                                                                                                                                                                                                                                                                                                                                                                                                                                                                                                                                                                                                                                                                                                                                                                                                                               |   |                      |                                      |    |                      |               |   |                      |                                                           |    |                       |         |   |                    |                     |   |                    |         |   |                    |                   |   |                    |                |   |                    |        |    |                     |                         |    |                     |                  |    |                     |                 |    |                     |          |    |                     |          |    |                     |               |    |                     |                        |    |                     |                          |    |                     |               |    |                     |                 |    |                     |      |
| 98  | momadmitcond_va__98                                                                  | Other (specify)                                                                                                 |                                                                                                                                                                                                                                                                                                                                                                                                                                                                                                                                                                                                                                                                                                                                                                                                                                                                                                                                                                                                                                                                                                                                                                                                                                                                                                                                                                                                                                                                                                                               |   |                      |                                      |    |                      |               |   |                      |                                                           |    |                       |         |   |                    |                     |   |                    |         |   |                    |                   |   |                    |                |   |                    |        |    |                     |                         |    |                     |                  |    |                     |                 |    |                     |          |    |                     |          |    |                     |               |    |                     |                        |    |                     |                          |    |                     |               |    |                     |                 |    |                     |      |
| 99  | momadmitcond_va__99                                                                  | None                                                                                                            |                                                                                                                                                                                                                                                                                                                                                                                                                                                                                                                                                                                                                                                                                                                                                                                                                                                                                                                                                                                                                                                                                                                                                                                                                                                                                                                                                                                                                                                                                                                               |   |                      |                                      |    |                      |               |   |                      |                                                           |    |                       |         |   |                    |                     |   |                    |         |   |                    |                   |   |                    |                |   |                    |        |    |                     |                         |    |                     |                  |    |                     |                 |    |                     |          |    |                     |          |    |                     |               |    |                     |                        |    |                     |                          |    |                     |               |    |                     |                 |    |                     |      |
| 316 | [momadmitcondother_va]<br>Show the field ONLY if:<br>[momadmitcond_va(98)] = '1'     | Other condition:                                                                                                | text                                                                                                                                                                                                                                                                                                                                                                                                                                                                                                                                                                                                                                                                                                                                                                                                                                                                                                                                                                                                                                                                                                                                                                                                                                                                                                                                                                                                                                                                                                                          |   |                      |                                      |    |                      |               |   |                      |                                                           |    |                       |         |   |                    |                     |   |                    |         |   |                    |                   |   |                    |                |   |                    |        |    |                     |                         |    |                     |                  |    |                     |                 |    |                     |          |    |                     |          |    |                     |               |    |                     |                        |    |                     |                          |    |                     |               |    |                     |                 |    |                     |      |
| 317 | [momseek_va]<br>Show the field ONLY if:<br>[dischstat_mat] != '3'                    | Did she seek care at a facility at any time after being home post-delivery that DID NOT result in an admission? | yesno<br><table border="1" data-bbox="1031 1087 1105 1159"> <tr><td>1</td><td>Yes</td></tr> <tr><td>0</td><td>No</td></tr> </table>                                                                                                                                                                                                                                                                                                                                                                                                                                                                                                                                                                                                                                                                                                                                                                                                                                                                                                                                                                                                                                                                                                                                                                                                                                                                                                                                                                                           | 1 | Yes                  | 0                                    | No |                      |               |   |                      |                                                           |    |                       |         |   |                    |                     |   |                    |         |   |                    |                   |   |                    |                |   |                    |        |    |                     |                         |    |                     |                  |    |                     |                 |    |                     |          |    |                     |          |    |                     |               |    |                     |                        |    |                     |                          |    |                     |               |    |                     |                 |    |                     |      |
| 1   | Yes                                                                                  |                                                                                                                 |                                                                                                                                                                                                                                                                                                                                                                                                                                                                                                                                                                                                                                                                                                                                                                                                                                                                                                                                                                                                                                                                                                                                                                                                                                                                                                                                                                                                                                                                                                                               |   |                      |                                      |    |                      |               |   |                      |                                                           |    |                       |         |   |                    |                     |   |                    |         |   |                    |                   |   |                    |                |   |                    |        |    |                     |                         |    |                     |                  |    |                     |                 |    |                     |          |    |                     |          |    |                     |               |    |                     |                        |    |                     |                          |    |                     |               |    |                     |                 |    |                     |      |
| 0   | No                                                                                   |                                                                                                                 |                                                                                                                                                                                                                                                                                                                                                                                                                                                                                                                                                                                                                                                                                                                                                                                                                                                                                                                                                                                                                                                                                                                                                                                                                                                                                                                                                                                                                                                                                                                               |   |                      |                                      |    |                      |               |   |                      |                                                           |    |                       |         |   |                    |                     |   |                    |         |   |                    |                   |   |                    |                |   |                    |        |    |                     |                         |    |                     |                  |    |                     |                 |    |                     |          |    |                     |          |    |                     |               |    |                     |                        |    |                     |                          |    |                     |               |    |                     |                 |    |                     |      |
| 318 | [momseekdate_va]<br>Show the field ONLY if:<br>[momseek_va] = '1'                    | Date of first care seeking visit:                                                                               | text (date_dmy)                                                                                                                                                                                                                                                                                                                                                                                                                                                                                                                                                                                                                                                                                                                                                                                                                                                                                                                                                                                                                                                                                                                                                                                                                                                                                                                                                                                                                                                                                                               |   |                      |                                      |    |                      |               |   |                      |                                                           |    |                       |         |   |                    |                     |   |                    |         |   |                    |                   |   |                    |                |   |                    |        |    |                     |                         |    |                     |                  |    |                     |                 |    |                     |          |    |                     |          |    |                     |               |    |                     |                        |    |                     |                          |    |                     |               |    |                     |                 |    |                     |      |
| 319 | [momseekpathway_va]<br>Show the field ONLY if:<br>[momseek_va] = '1'                 | What was the care-seeking pathway for this visit?                                                               | checkbox <table border="1" data-bbox="1031 1304 1508 1558"> <tr><td>1</td><td>momseekpathway_va__1</td><td>Routine PNC visit identified problem</td></tr> <tr><td>2</td><td>momseekpathway_va__2</td><td>Self referral</td></tr> <tr><td>3</td><td>momseekpathway_va__3</td><td>Both self-referral and PNC visit resulted in care seeking</td></tr> <tr><td>98</td><td>momseekpathway_va__98</td><td>Other</td></tr> </table>                                                                                                                                                                                                                                                                                                                                                                                                                                                                                                                                                                                                                                                                                                                                                                                                                                                                                                                                                                                                                                                                                                 | 1 | momseekpathway_va__1 | Routine PNC visit identified problem | 2  | momseekpathway_va__2 | Self referral | 3 | momseekpathway_va__3 | Both self-referral and PNC visit resulted in care seeking | 98 | momseekpathway_va__98 | Other   |   |                    |                     |   |                    |         |   |                    |                   |   |                    |                |   |                    |        |    |                     |                         |    |                     |                  |    |                     |                 |    |                     |          |    |                     |          |    |                     |               |    |                     |                        |    |                     |                          |    |                     |               |    |                     |                 |    |                     |      |
| 1   | momseekpathway_va__1                                                                 | Routine PNC visit identified problem                                                                            |                                                                                                                                                                                                                                                                                                                                                                                                                                                                                                                                                                                                                                                                                                                                                                                                                                                                                                                                                                                                                                                                                                                                                                                                                                                                                                                                                                                                                                                                                                                               |   |                      |                                      |    |                      |               |   |                      |                                                           |    |                       |         |   |                    |                     |   |                    |         |   |                    |                   |   |                    |                |   |                    |        |    |                     |                         |    |                     |                  |    |                     |                 |    |                     |          |    |                     |          |    |                     |               |    |                     |                        |    |                     |                          |    |                     |               |    |                     |                 |    |                     |      |
| 2   | momseekpathway_va__2                                                                 | Self referral                                                                                                   |                                                                                                                                                                                                                                                                                                                                                                                                                                                                                                                                                                                                                                                                                                                                                                                                                                                                                                                                                                                                                                                                                                                                                                                                                                                                                                                                                                                                                                                                                                                               |   |                      |                                      |    |                      |               |   |                      |                                                           |    |                       |         |   |                    |                     |   |                    |         |   |                    |                   |   |                    |                |   |                    |        |    |                     |                         |    |                     |                  |    |                     |                 |    |                     |          |    |                     |          |    |                     |               |    |                     |                        |    |                     |                          |    |                     |               |    |                     |                 |    |                     |      |
| 3   | momseekpathway_va__3                                                                 | Both self-referral and PNC visit resulted in care seeking                                                       |                                                                                                                                                                                                                                                                                                                                                                                                                                                                                                                                                                                                                                                                                                                                                                                                                                                                                                                                                                                                                                                                                                                                                                                                                                                                                                                                                                                                                                                                                                                               |   |                      |                                      |    |                      |               |   |                      |                                                           |    |                       |         |   |                    |                     |   |                    |         |   |                    |                   |   |                    |                |   |                    |        |    |                     |                         |    |                     |                  |    |                     |                 |    |                     |          |    |                     |          |    |                     |               |    |                     |                        |    |                     |                          |    |                     |               |    |                     |                 |    |                     |      |
| 98  | momseekpathway_va__98                                                                | Other                                                                                                           |                                                                                                                                                                                                                                                                                                                                                                                                                                                                                                                                                                                                                                                                                                                                                                                                                                                                                                                                                                                                                                                                                                                                                                                                                                                                                                                                                                                                                                                                                                                               |   |                      |                                      |    |                      |               |   |                      |                                                           |    |                       |         |   |                    |                     |   |                    |         |   |                    |                   |   |                    |                |   |                    |        |    |                     |                         |    |                     |                  |    |                     |                 |    |                     |          |    |                     |          |    |                     |               |    |                     |                        |    |                     |                          |    |                     |               |    |                     |                 |    |                     |      |
| 320 | [momseekpathwayother_va]<br>Show the field ONLY if:<br>[momseekpathway_va(98)] = '1' | Other pathway:                                                                                                  | text                                                                                                                                                                                                                                                                                                                                                                                                                                                                                                                                                                                                                                                                                                                                                                                                                                                                                                                                                                                                                                                                                                                                                                                                                                                                                                                                                                                                                                                                                                                          |   |                      |                                      |    |                      |               |   |                      |                                                           |    |                       |         |   |                    |                     |   |                    |         |   |                    |                   |   |                    |                |   |                    |        |    |                     |                         |    |                     |                  |    |                     |                 |    |                     |          |    |                     |          |    |                     |               |    |                     |                        |    |                     |                          |    |                     |               |    |                     |                 |    |                     |      |



|     |                                                                                            |                                                                                           |                                                                                                                                                                                                                                                                                                                                                                                                                                                                                                                                                                                                                                                                                                                                                                                                                                                                                                                                                                                                                                                                                                                                                                                                                                                                                                                                                                                                                                                                                                                                                                                                                                                                                                                                                                                                                                                                                                                     |   |                   |                        |   |                   |                                |   |                   |                                                        |   |                   |                    |   |                   |             |   |                   |                     |   |                   |                   |   |                   |                          |   |                   |                         |    |                    |                |    |                    |                                   |    |                    |                                 |    |                    |                             |    |                    |                            |    |                    |                    |    |                    |                   |    |                    |                     |    |                    |                 |    |                    |                |    |                    |             |    |                    |                       |    |                    |                 |    |                    |      |
|-----|--------------------------------------------------------------------------------------------|-------------------------------------------------------------------------------------------|---------------------------------------------------------------------------------------------------------------------------------------------------------------------------------------------------------------------------------------------------------------------------------------------------------------------------------------------------------------------------------------------------------------------------------------------------------------------------------------------------------------------------------------------------------------------------------------------------------------------------------------------------------------------------------------------------------------------------------------------------------------------------------------------------------------------------------------------------------------------------------------------------------------------------------------------------------------------------------------------------------------------------------------------------------------------------------------------------------------------------------------------------------------------------------------------------------------------------------------------------------------------------------------------------------------------------------------------------------------------------------------------------------------------------------------------------------------------------------------------------------------------------------------------------------------------------------------------------------------------------------------------------------------------------------------------------------------------------------------------------------------------------------------------------------------------------------------------------------------------------------------------------------------------|---|-------------------|------------------------|---|-------------------|--------------------------------|---|-------------------|--------------------------------------------------------|---|-------------------|--------------------|---|-------------------|-------------|---|-------------------|---------------------|---|-------------------|-------------------|---|-------------------|--------------------------|---|-------------------|-------------------------|----|--------------------|----------------|----|--------------------|-----------------------------------|----|--------------------|---------------------------------|----|--------------------|-----------------------------|----|--------------------|----------------------------|----|--------------------|--------------------|----|--------------------|-------------------|----|--------------------|---------------------|----|--------------------|-----------------|----|--------------------|----------------|----|--------------------|-------------|----|--------------------|-----------------------|----|--------------------|-----------------|----|--------------------|------|
| 321 | <p>[momseeksymp_va]</p> <p>Show the field ONLY if:<br/>[momseek_va] = '1'</p>              | <p>What were the symptoms she experienced during this illness (check all that apply)?</p> | <p>checkbox</p> <table border="1"> <tr><td>1</td><td>momseeksymp_va__1</td><td>Heavy vaginal bleeding</td></tr> <tr><td>2</td><td>momseeksymp_va__2</td><td>Bleeding from nose/ eyes/ ears</td></tr> <tr><td>3</td><td>momseeksymp_va__3</td><td>Petechiae (small red dots and bruises across the skin)</td></tr> <tr><td>4</td><td>momseeksymp_va__4</td><td>Abnormal tiredness</td></tr> <tr><td>5</td><td>momseeksymp_va__5</td><td>Convulsions</td></tr> <tr><td>6</td><td>momseeksymp_va__6</td><td>Shortness of breath</td></tr> <tr><td>7</td><td>momseeksymp_va__7</td><td>Changes in vision</td></tr> <tr><td>8</td><td>momseeksymp_va__8</td><td>Severe headache &lt; 24 hrs</td></tr> <tr><td>9</td><td>momseeksymp_va__9</td><td>Severe headache &gt;24 hrs</td></tr> <tr><td>10</td><td>momseeksymp_va__10</td><td>Abdominal pain</td></tr> <tr><td>11</td><td>momseeksymp_va__11</td><td>Abdominal tenderness when touched</td></tr> <tr><td>12</td><td>momseeksymp_va__12</td><td>Foul smelling vaginal discharge</td></tr> <tr><td>13</td><td>momseeksymp_va__13</td><td>Fever/ body hotness &lt; 7days</td></tr> <tr><td>14</td><td>momseeksymp_va__14</td><td>Fever/ body hotness &gt;7days</td></tr> <tr><td>15</td><td>momseeksymp_va__15</td><td>Diarrhea &lt; 14 days</td></tr> <tr><td>16</td><td>momseeksymp_va__16</td><td>Diarrhea &gt;14 days</td></tr> <tr><td>17</td><td>momseeksymp_va__17</td><td>Vomiting everything</td></tr> <tr><td>18</td><td>momseeksymp_va__18</td><td>Cough &lt; 14 days</td></tr> <tr><td>19</td><td>momseeksymp_va__19</td><td>Cough &gt;14 days</td></tr> <tr><td>20</td><td>momseeksymp_va__20</td><td>Yellow eyes</td></tr> <tr><td>21</td><td>momseeksymp_va__21</td><td>Loss of consciousness</td></tr> <tr><td>98</td><td>momseeksymp_va__98</td><td>Other (specify)</td></tr> <tr><td>99</td><td>momseeksymp_va__99</td><td>None</td></tr> </table> | 1 | momseeksymp_va__1 | Heavy vaginal bleeding | 2 | momseeksymp_va__2 | Bleeding from nose/ eyes/ ears | 3 | momseeksymp_va__3 | Petechiae (small red dots and bruises across the skin) | 4 | momseeksymp_va__4 | Abnormal tiredness | 5 | momseeksymp_va__5 | Convulsions | 6 | momseeksymp_va__6 | Shortness of breath | 7 | momseeksymp_va__7 | Changes in vision | 8 | momseeksymp_va__8 | Severe headache < 24 hrs | 9 | momseeksymp_va__9 | Severe headache >24 hrs | 10 | momseeksymp_va__10 | Abdominal pain | 11 | momseeksymp_va__11 | Abdominal tenderness when touched | 12 | momseeksymp_va__12 | Foul smelling vaginal discharge | 13 | momseeksymp_va__13 | Fever/ body hotness < 7days | 14 | momseeksymp_va__14 | Fever/ body hotness >7days | 15 | momseeksymp_va__15 | Diarrhea < 14 days | 16 | momseeksymp_va__16 | Diarrhea >14 days | 17 | momseeksymp_va__17 | Vomiting everything | 18 | momseeksymp_va__18 | Cough < 14 days | 19 | momseeksymp_va__19 | Cough >14 days | 20 | momseeksymp_va__20 | Yellow eyes | 21 | momseeksymp_va__21 | Loss of consciousness | 98 | momseeksymp_va__98 | Other (specify) | 99 | momseeksymp_va__99 | None |
| 1   | momseeksymp_va__1                                                                          | Heavy vaginal bleeding                                                                    |                                                                                                                                                                                                                                                                                                                                                                                                                                                                                                                                                                                                                                                                                                                                                                                                                                                                                                                                                                                                                                                                                                                                                                                                                                                                                                                                                                                                                                                                                                                                                                                                                                                                                                                                                                                                                                                                                                                     |   |                   |                        |   |                   |                                |   |                   |                                                        |   |                   |                    |   |                   |             |   |                   |                     |   |                   |                   |   |                   |                          |   |                   |                         |    |                    |                |    |                    |                                   |    |                    |                                 |    |                    |                             |    |                    |                            |    |                    |                    |    |                    |                   |    |                    |                     |    |                    |                 |    |                    |                |    |                    |             |    |                    |                       |    |                    |                 |    |                    |      |
| 2   | momseeksymp_va__2                                                                          | Bleeding from nose/ eyes/ ears                                                            |                                                                                                                                                                                                                                                                                                                                                                                                                                                                                                                                                                                                                                                                                                                                                                                                                                                                                                                                                                                                                                                                                                                                                                                                                                                                                                                                                                                                                                                                                                                                                                                                                                                                                                                                                                                                                                                                                                                     |   |                   |                        |   |                   |                                |   |                   |                                                        |   |                   |                    |   |                   |             |   |                   |                     |   |                   |                   |   |                   |                          |   |                   |                         |    |                    |                |    |                    |                                   |    |                    |                                 |    |                    |                             |    |                    |                            |    |                    |                    |    |                    |                   |    |                    |                     |    |                    |                 |    |                    |                |    |                    |             |    |                    |                       |    |                    |                 |    |                    |      |
| 3   | momseeksymp_va__3                                                                          | Petechiae (small red dots and bruises across the skin)                                    |                                                                                                                                                                                                                                                                                                                                                                                                                                                                                                                                                                                                                                                                                                                                                                                                                                                                                                                                                                                                                                                                                                                                                                                                                                                                                                                                                                                                                                                                                                                                                                                                                                                                                                                                                                                                                                                                                                                     |   |                   |                        |   |                   |                                |   |                   |                                                        |   |                   |                    |   |                   |             |   |                   |                     |   |                   |                   |   |                   |                          |   |                   |                         |    |                    |                |    |                    |                                   |    |                    |                                 |    |                    |                             |    |                    |                            |    |                    |                    |    |                    |                   |    |                    |                     |    |                    |                 |    |                    |                |    |                    |             |    |                    |                       |    |                    |                 |    |                    |      |
| 4   | momseeksymp_va__4                                                                          | Abnormal tiredness                                                                        |                                                                                                                                                                                                                                                                                                                                                                                                                                                                                                                                                                                                                                                                                                                                                                                                                                                                                                                                                                                                                                                                                                                                                                                                                                                                                                                                                                                                                                                                                                                                                                                                                                                                                                                                                                                                                                                                                                                     |   |                   |                        |   |                   |                                |   |                   |                                                        |   |                   |                    |   |                   |             |   |                   |                     |   |                   |                   |   |                   |                          |   |                   |                         |    |                    |                |    |                    |                                   |    |                    |                                 |    |                    |                             |    |                    |                            |    |                    |                    |    |                    |                   |    |                    |                     |    |                    |                 |    |                    |                |    |                    |             |    |                    |                       |    |                    |                 |    |                    |      |
| 5   | momseeksymp_va__5                                                                          | Convulsions                                                                               |                                                                                                                                                                                                                                                                                                                                                                                                                                                                                                                                                                                                                                                                                                                                                                                                                                                                                                                                                                                                                                                                                                                                                                                                                                                                                                                                                                                                                                                                                                                                                                                                                                                                                                                                                                                                                                                                                                                     |   |                   |                        |   |                   |                                |   |                   |                                                        |   |                   |                    |   |                   |             |   |                   |                     |   |                   |                   |   |                   |                          |   |                   |                         |    |                    |                |    |                    |                                   |    |                    |                                 |    |                    |                             |    |                    |                            |    |                    |                    |    |                    |                   |    |                    |                     |    |                    |                 |    |                    |                |    |                    |             |    |                    |                       |    |                    |                 |    |                    |      |
| 6   | momseeksymp_va__6                                                                          | Shortness of breath                                                                       |                                                                                                                                                                                                                                                                                                                                                                                                                                                                                                                                                                                                                                                                                                                                                                                                                                                                                                                                                                                                                                                                                                                                                                                                                                                                                                                                                                                                                                                                                                                                                                                                                                                                                                                                                                                                                                                                                                                     |   |                   |                        |   |                   |                                |   |                   |                                                        |   |                   |                    |   |                   |             |   |                   |                     |   |                   |                   |   |                   |                          |   |                   |                         |    |                    |                |    |                    |                                   |    |                    |                                 |    |                    |                             |    |                    |                            |    |                    |                    |    |                    |                   |    |                    |                     |    |                    |                 |    |                    |                |    |                    |             |    |                    |                       |    |                    |                 |    |                    |      |
| 7   | momseeksymp_va__7                                                                          | Changes in vision                                                                         |                                                                                                                                                                                                                                                                                                                                                                                                                                                                                                                                                                                                                                                                                                                                                                                                                                                                                                                                                                                                                                                                                                                                                                                                                                                                                                                                                                                                                                                                                                                                                                                                                                                                                                                                                                                                                                                                                                                     |   |                   |                        |   |                   |                                |   |                   |                                                        |   |                   |                    |   |                   |             |   |                   |                     |   |                   |                   |   |                   |                          |   |                   |                         |    |                    |                |    |                    |                                   |    |                    |                                 |    |                    |                             |    |                    |                            |    |                    |                    |    |                    |                   |    |                    |                     |    |                    |                 |    |                    |                |    |                    |             |    |                    |                       |    |                    |                 |    |                    |      |
| 8   | momseeksymp_va__8                                                                          | Severe headache < 24 hrs                                                                  |                                                                                                                                                                                                                                                                                                                                                                                                                                                                                                                                                                                                                                                                                                                                                                                                                                                                                                                                                                                                                                                                                                                                                                                                                                                                                                                                                                                                                                                                                                                                                                                                                                                                                                                                                                                                                                                                                                                     |   |                   |                        |   |                   |                                |   |                   |                                                        |   |                   |                    |   |                   |             |   |                   |                     |   |                   |                   |   |                   |                          |   |                   |                         |    |                    |                |    |                    |                                   |    |                    |                                 |    |                    |                             |    |                    |                            |    |                    |                    |    |                    |                   |    |                    |                     |    |                    |                 |    |                    |                |    |                    |             |    |                    |                       |    |                    |                 |    |                    |      |
| 9   | momseeksymp_va__9                                                                          | Severe headache >24 hrs                                                                   |                                                                                                                                                                                                                                                                                                                                                                                                                                                                                                                                                                                                                                                                                                                                                                                                                                                                                                                                                                                                                                                                                                                                                                                                                                                                                                                                                                                                                                                                                                                                                                                                                                                                                                                                                                                                                                                                                                                     |   |                   |                        |   |                   |                                |   |                   |                                                        |   |                   |                    |   |                   |             |   |                   |                     |   |                   |                   |   |                   |                          |   |                   |                         |    |                    |                |    |                    |                                   |    |                    |                                 |    |                    |                             |    |                    |                            |    |                    |                    |    |                    |                   |    |                    |                     |    |                    |                 |    |                    |                |    |                    |             |    |                    |                       |    |                    |                 |    |                    |      |
| 10  | momseeksymp_va__10                                                                         | Abdominal pain                                                                            |                                                                                                                                                                                                                                                                                                                                                                                                                                                                                                                                                                                                                                                                                                                                                                                                                                                                                                                                                                                                                                                                                                                                                                                                                                                                                                                                                                                                                                                                                                                                                                                                                                                                                                                                                                                                                                                                                                                     |   |                   |                        |   |                   |                                |   |                   |                                                        |   |                   |                    |   |                   |             |   |                   |                     |   |                   |                   |   |                   |                          |   |                   |                         |    |                    |                |    |                    |                                   |    |                    |                                 |    |                    |                             |    |                    |                            |    |                    |                    |    |                    |                   |    |                    |                     |    |                    |                 |    |                    |                |    |                    |             |    |                    |                       |    |                    |                 |    |                    |      |
| 11  | momseeksymp_va__11                                                                         | Abdominal tenderness when touched                                                         |                                                                                                                                                                                                                                                                                                                                                                                                                                                                                                                                                                                                                                                                                                                                                                                                                                                                                                                                                                                                                                                                                                                                                                                                                                                                                                                                                                                                                                                                                                                                                                                                                                                                                                                                                                                                                                                                                                                     |   |                   |                        |   |                   |                                |   |                   |                                                        |   |                   |                    |   |                   |             |   |                   |                     |   |                   |                   |   |                   |                          |   |                   |                         |    |                    |                |    |                    |                                   |    |                    |                                 |    |                    |                             |    |                    |                            |    |                    |                    |    |                    |                   |    |                    |                     |    |                    |                 |    |                    |                |    |                    |             |    |                    |                       |    |                    |                 |    |                    |      |
| 12  | momseeksymp_va__12                                                                         | Foul smelling vaginal discharge                                                           |                                                                                                                                                                                                                                                                                                                                                                                                                                                                                                                                                                                                                                                                                                                                                                                                                                                                                                                                                                                                                                                                                                                                                                                                                                                                                                                                                                                                                                                                                                                                                                                                                                                                                                                                                                                                                                                                                                                     |   |                   |                        |   |                   |                                |   |                   |                                                        |   |                   |                    |   |                   |             |   |                   |                     |   |                   |                   |   |                   |                          |   |                   |                         |    |                    |                |    |                    |                                   |    |                    |                                 |    |                    |                             |    |                    |                            |    |                    |                    |    |                    |                   |    |                    |                     |    |                    |                 |    |                    |                |    |                    |             |    |                    |                       |    |                    |                 |    |                    |      |
| 13  | momseeksymp_va__13                                                                         | Fever/ body hotness < 7days                                                               |                                                                                                                                                                                                                                                                                                                                                                                                                                                                                                                                                                                                                                                                                                                                                                                                                                                                                                                                                                                                                                                                                                                                                                                                                                                                                                                                                                                                                                                                                                                                                                                                                                                                                                                                                                                                                                                                                                                     |   |                   |                        |   |                   |                                |   |                   |                                                        |   |                   |                    |   |                   |             |   |                   |                     |   |                   |                   |   |                   |                          |   |                   |                         |    |                    |                |    |                    |                                   |    |                    |                                 |    |                    |                             |    |                    |                            |    |                    |                    |    |                    |                   |    |                    |                     |    |                    |                 |    |                    |                |    |                    |             |    |                    |                       |    |                    |                 |    |                    |      |
| 14  | momseeksymp_va__14                                                                         | Fever/ body hotness >7days                                                                |                                                                                                                                                                                                                                                                                                                                                                                                                                                                                                                                                                                                                                                                                                                                                                                                                                                                                                                                                                                                                                                                                                                                                                                                                                                                                                                                                                                                                                                                                                                                                                                                                                                                                                                                                                                                                                                                                                                     |   |                   |                        |   |                   |                                |   |                   |                                                        |   |                   |                    |   |                   |             |   |                   |                     |   |                   |                   |   |                   |                          |   |                   |                         |    |                    |                |    |                    |                                   |    |                    |                                 |    |                    |                             |    |                    |                            |    |                    |                    |    |                    |                   |    |                    |                     |    |                    |                 |    |                    |                |    |                    |             |    |                    |                       |    |                    |                 |    |                    |      |
| 15  | momseeksymp_va__15                                                                         | Diarrhea < 14 days                                                                        |                                                                                                                                                                                                                                                                                                                                                                                                                                                                                                                                                                                                                                                                                                                                                                                                                                                                                                                                                                                                                                                                                                                                                                                                                                                                                                                                                                                                                                                                                                                                                                                                                                                                                                                                                                                                                                                                                                                     |   |                   |                        |   |                   |                                |   |                   |                                                        |   |                   |                    |   |                   |             |   |                   |                     |   |                   |                   |   |                   |                          |   |                   |                         |    |                    |                |    |                    |                                   |    |                    |                                 |    |                    |                             |    |                    |                            |    |                    |                    |    |                    |                   |    |                    |                     |    |                    |                 |    |                    |                |    |                    |             |    |                    |                       |    |                    |                 |    |                    |      |
| 16  | momseeksymp_va__16                                                                         | Diarrhea >14 days                                                                         |                                                                                                                                                                                                                                                                                                                                                                                                                                                                                                                                                                                                                                                                                                                                                                                                                                                                                                                                                                                                                                                                                                                                                                                                                                                                                                                                                                                                                                                                                                                                                                                                                                                                                                                                                                                                                                                                                                                     |   |                   |                        |   |                   |                                |   |                   |                                                        |   |                   |                    |   |                   |             |   |                   |                     |   |                   |                   |   |                   |                          |   |                   |                         |    |                    |                |    |                    |                                   |    |                    |                                 |    |                    |                             |    |                    |                            |    |                    |                    |    |                    |                   |    |                    |                     |    |                    |                 |    |                    |                |    |                    |             |    |                    |                       |    |                    |                 |    |                    |      |
| 17  | momseeksymp_va__17                                                                         | Vomiting everything                                                                       |                                                                                                                                                                                                                                                                                                                                                                                                                                                                                                                                                                                                                                                                                                                                                                                                                                                                                                                                                                                                                                                                                                                                                                                                                                                                                                                                                                                                                                                                                                                                                                                                                                                                                                                                                                                                                                                                                                                     |   |                   |                        |   |                   |                                |   |                   |                                                        |   |                   |                    |   |                   |             |   |                   |                     |   |                   |                   |   |                   |                          |   |                   |                         |    |                    |                |    |                    |                                   |    |                    |                                 |    |                    |                             |    |                    |                            |    |                    |                    |    |                    |                   |    |                    |                     |    |                    |                 |    |                    |                |    |                    |             |    |                    |                       |    |                    |                 |    |                    |      |
| 18  | momseeksymp_va__18                                                                         | Cough < 14 days                                                                           |                                                                                                                                                                                                                                                                                                                                                                                                                                                                                                                                                                                                                                                                                                                                                                                                                                                                                                                                                                                                                                                                                                                                                                                                                                                                                                                                                                                                                                                                                                                                                                                                                                                                                                                                                                                                                                                                                                                     |   |                   |                        |   |                   |                                |   |                   |                                                        |   |                   |                    |   |                   |             |   |                   |                     |   |                   |                   |   |                   |                          |   |                   |                         |    |                    |                |    |                    |                                   |    |                    |                                 |    |                    |                             |    |                    |                            |    |                    |                    |    |                    |                   |    |                    |                     |    |                    |                 |    |                    |                |    |                    |             |    |                    |                       |    |                    |                 |    |                    |      |
| 19  | momseeksymp_va__19                                                                         | Cough >14 days                                                                            |                                                                                                                                                                                                                                                                                                                                                                                                                                                                                                                                                                                                                                                                                                                                                                                                                                                                                                                                                                                                                                                                                                                                                                                                                                                                                                                                                                                                                                                                                                                                                                                                                                                                                                                                                                                                                                                                                                                     |   |                   |                        |   |                   |                                |   |                   |                                                        |   |                   |                    |   |                   |             |   |                   |                     |   |                   |                   |   |                   |                          |   |                   |                         |    |                    |                |    |                    |                                   |    |                    |                                 |    |                    |                             |    |                    |                            |    |                    |                    |    |                    |                   |    |                    |                     |    |                    |                 |    |                    |                |    |                    |             |    |                    |                       |    |                    |                 |    |                    |      |
| 20  | momseeksymp_va__20                                                                         | Yellow eyes                                                                               |                                                                                                                                                                                                                                                                                                                                                                                                                                                                                                                                                                                                                                                                                                                                                                                                                                                                                                                                                                                                                                                                                                                                                                                                                                                                                                                                                                                                                                                                                                                                                                                                                                                                                                                                                                                                                                                                                                                     |   |                   |                        |   |                   |                                |   |                   |                                                        |   |                   |                    |   |                   |             |   |                   |                     |   |                   |                   |   |                   |                          |   |                   |                         |    |                    |                |    |                    |                                   |    |                    |                                 |    |                    |                             |    |                    |                            |    |                    |                    |    |                    |                   |    |                    |                     |    |                    |                 |    |                    |                |    |                    |             |    |                    |                       |    |                    |                 |    |                    |      |
| 21  | momseeksymp_va__21                                                                         | Loss of consciousness                                                                     |                                                                                                                                                                                                                                                                                                                                                                                                                                                                                                                                                                                                                                                                                                                                                                                                                                                                                                                                                                                                                                                                                                                                                                                                                                                                                                                                                                                                                                                                                                                                                                                                                                                                                                                                                                                                                                                                                                                     |   |                   |                        |   |                   |                                |   |                   |                                                        |   |                   |                    |   |                   |             |   |                   |                     |   |                   |                   |   |                   |                          |   |                   |                         |    |                    |                |    |                    |                                   |    |                    |                                 |    |                    |                             |    |                    |                            |    |                    |                    |    |                    |                   |    |                    |                     |    |                    |                 |    |                    |                |    |                    |             |    |                    |                       |    |                    |                 |    |                    |      |
| 98  | momseeksymp_va__98                                                                         | Other (specify)                                                                           |                                                                                                                                                                                                                                                                                                                                                                                                                                                                                                                                                                                                                                                                                                                                                                                                                                                                                                                                                                                                                                                                                                                                                                                                                                                                                                                                                                                                                                                                                                                                                                                                                                                                                                                                                                                                                                                                                                                     |   |                   |                        |   |                   |                                |   |                   |                                                        |   |                   |                    |   |                   |             |   |                   |                     |   |                   |                   |   |                   |                          |   |                   |                         |    |                    |                |    |                    |                                   |    |                    |                                 |    |                    |                             |    |                    |                            |    |                    |                    |    |                    |                   |    |                    |                     |    |                    |                 |    |                    |                |    |                    |             |    |                    |                       |    |                    |                 |    |                    |      |
| 99  | momseeksymp_va__99                                                                         | None                                                                                      |                                                                                                                                                                                                                                                                                                                                                                                                                                                                                                                                                                                                                                                                                                                                                                                                                                                                                                                                                                                                                                                                                                                                                                                                                                                                                                                                                                                                                                                                                                                                                                                                                                                                                                                                                                                                                                                                                                                     |   |                   |                        |   |                   |                                |   |                   |                                                        |   |                   |                    |   |                   |             |   |                   |                     |   |                   |                   |   |                   |                          |   |                   |                         |    |                    |                |    |                    |                                   |    |                    |                                 |    |                    |                             |    |                    |                            |    |                    |                    |    |                    |                   |    |                    |                     |    |                    |                 |    |                    |                |    |                    |             |    |                    |                       |    |                    |                 |    |                    |      |
| 322 | <p>[momseeksympother_va]</p> <p>Show the field ONLY if:<br/>[momseeksymp_va(98)] = '1'</p> | <p>Other symptom:</p>                                                                     | <p>text</p>                                                                                                                                                                                                                                                                                                                                                                                                                                                                                                                                                                                                                                                                                                                                                                                                                                                                                                                                                                                                                                                                                                                                                                                                                                                                                                                                                                                                                                                                                                                                                                                                                                                                                                                                                                                                                                                                                                         |   |                   |                        |   |                   |                                |   |                   |                                                        |   |                   |                    |   |                   |             |   |                   |                     |   |                   |                   |   |                   |                          |   |                   |                         |    |                    |                |    |                    |                                   |    |                    |                                 |    |                    |                             |    |                    |                            |    |                    |                    |    |                    |                   |    |                    |                     |    |                    |                 |    |                    |                |    |                    |             |    |                    |                       |    |                    |                 |    |                    |      |

|     |                                                                                            |                                                                                                                                      |                                                                                                                                                                                                                                                                                                                                                                                                                                                                                                                                                                                                                                                                                                                                                                                                                                                                                                                                                                                                                                                                                                                                                                                                                                                                                                                                                                                                                                                                    |   |                   |               |                                             |                   |                                             |    |                                     |          |                                      |                   |         |    |                   |     |                   |                   |         |   |                   |                   |   |                   |                |   |                   |        |    |                    |                         |    |                    |                  |    |                    |                 |    |                    |          |    |                    |          |    |                    |               |    |                    |                        |    |                    |                          |    |                    |               |    |                    |                 |    |                    |      |
|-----|--------------------------------------------------------------------------------------------|--------------------------------------------------------------------------------------------------------------------------------------|--------------------------------------------------------------------------------------------------------------------------------------------------------------------------------------------------------------------------------------------------------------------------------------------------------------------------------------------------------------------------------------------------------------------------------------------------------------------------------------------------------------------------------------------------------------------------------------------------------------------------------------------------------------------------------------------------------------------------------------------------------------------------------------------------------------------------------------------------------------------------------------------------------------------------------------------------------------------------------------------------------------------------------------------------------------------------------------------------------------------------------------------------------------------------------------------------------------------------------------------------------------------------------------------------------------------------------------------------------------------------------------------------------------------------------------------------------------------|---|-------------------|---------------|---------------------------------------------|-------------------|---------------------------------------------|----|-------------------------------------|----------|--------------------------------------|-------------------|---------|----|-------------------|-----|-------------------|-------------------|---------|---|-------------------|-------------------|---|-------------------|----------------|---|-------------------|--------|----|--------------------|-------------------------|----|--------------------|------------------|----|--------------------|-----------------|----|--------------------|----------|----|--------------------|----------|----|--------------------|---------------|----|--------------------|------------------------|----|--------------------|--------------------------|----|--------------------|---------------|----|--------------------|-----------------|----|--------------------|------|
| 323 | <p>[momseekcond_va]</p> <p>Show the field ONLY if:<br/>[momseek_va] = '1'</p>              | <p>Was she told she had any of the following conditions during this visit (check all that apply)?</p>                                | <p>checkbox</p> <table border="1"> <tr><td>1</td><td>momseekcond_va__1</td><td>Pre-eclampsia</td></tr> <tr><td>2</td><td>momseekcond_va__2</td><td>Eclampsia</td></tr> <tr><td>3</td><td>momseekcond_va__3</td><td>Diabetes</td></tr> <tr><td>4</td><td>momseekcond_va__4</td><td>Fistula</td></tr> <tr><td>5</td><td>momseekcond_va__5</td><td>HIV</td></tr> <tr><td>6</td><td>momseekcond_va__6</td><td>Malaria</td></tr> <tr><td>7</td><td>momseekcond_va__7</td><td>Retained placenta</td></tr> <tr><td>8</td><td>momseekcond_va__8</td><td>Heavy bleeding</td></tr> <tr><td>9</td><td>momseekcond_va__9</td><td>Anemia</td></tr> <tr><td>10</td><td>momseekcond_va__10</td><td>Surgical site infection</td></tr> <tr><td>11</td><td>momseekcond_va__11</td><td>Puerperal sepsis</td></tr> <tr><td>12</td><td>momseekcond_va__12</td><td>Other infection</td></tr> <tr><td>13</td><td>momseekcond_va__13</td><td>Diarrhea</td></tr> <tr><td>14</td><td>momseekcond_va__14</td><td>Vomiting</td></tr> <tr><td>15</td><td>momseekcond_va__15</td><td>PPD/psychosis</td></tr> <tr><td>16</td><td>momseekcond_va__16</td><td>Needed another surgery</td></tr> <tr><td>17</td><td>momseekcond_va__17</td><td>Needed blood transfusion</td></tr> <tr><td>18</td><td>momseekcond_va__18</td><td>Needed oxygen</td></tr> <tr><td>98</td><td>momseekcond_va__98</td><td>Other (specify)</td></tr> <tr><td>99</td><td>momseekcond_va__99</td><td>None</td></tr> </table> | 1 | momseekcond_va__1 | Pre-eclampsia | 2                                           | momseekcond_va__2 | Eclampsia                                   | 3  | momseekcond_va__3                   | Diabetes | 4                                    | momseekcond_va__4 | Fistula | 5  | momseekcond_va__5 | HIV | 6                 | momseekcond_va__6 | Malaria | 7 | momseekcond_va__7 | Retained placenta | 8 | momseekcond_va__8 | Heavy bleeding | 9 | momseekcond_va__9 | Anemia | 10 | momseekcond_va__10 | Surgical site infection | 11 | momseekcond_va__11 | Puerperal sepsis | 12 | momseekcond_va__12 | Other infection | 13 | momseekcond_va__13 | Diarrhea | 14 | momseekcond_va__14 | Vomiting | 15 | momseekcond_va__15 | PPD/psychosis | 16 | momseekcond_va__16 | Needed another surgery | 17 | momseekcond_va__17 | Needed blood transfusion | 18 | momseekcond_va__18 | Needed oxygen | 98 | momseekcond_va__98 | Other (specify) | 99 | momseekcond_va__99 | None |
| 1   | momseekcond_va__1                                                                          | Pre-eclampsia                                                                                                                        |                                                                                                                                                                                                                                                                                                                                                                                                                                                                                                                                                                                                                                                                                                                                                                                                                                                                                                                                                                                                                                                                                                                                                                                                                                                                                                                                                                                                                                                                    |   |                   |               |                                             |                   |                                             |    |                                     |          |                                      |                   |         |    |                   |     |                   |                   |         |   |                   |                   |   |                   |                |   |                   |        |    |                    |                         |    |                    |                  |    |                    |                 |    |                    |          |    |                    |          |    |                    |               |    |                    |                        |    |                    |                          |    |                    |               |    |                    |                 |    |                    |      |
| 2   | momseekcond_va__2                                                                          | Eclampsia                                                                                                                            |                                                                                                                                                                                                                                                                                                                                                                                                                                                                                                                                                                                                                                                                                                                                                                                                                                                                                                                                                                                                                                                                                                                                                                                                                                                                                                                                                                                                                                                                    |   |                   |               |                                             |                   |                                             |    |                                     |          |                                      |                   |         |    |                   |     |                   |                   |         |   |                   |                   |   |                   |                |   |                   |        |    |                    |                         |    |                    |                  |    |                    |                 |    |                    |          |    |                    |          |    |                    |               |    |                    |                        |    |                    |                          |    |                    |               |    |                    |                 |    |                    |      |
| 3   | momseekcond_va__3                                                                          | Diabetes                                                                                                                             |                                                                                                                                                                                                                                                                                                                                                                                                                                                                                                                                                                                                                                                                                                                                                                                                                                                                                                                                                                                                                                                                                                                                                                                                                                                                                                                                                                                                                                                                    |   |                   |               |                                             |                   |                                             |    |                                     |          |                                      |                   |         |    |                   |     |                   |                   |         |   |                   |                   |   |                   |                |   |                   |        |    |                    |                         |    |                    |                  |    |                    |                 |    |                    |          |    |                    |          |    |                    |               |    |                    |                        |    |                    |                          |    |                    |               |    |                    |                 |    |                    |      |
| 4   | momseekcond_va__4                                                                          | Fistula                                                                                                                              |                                                                                                                                                                                                                                                                                                                                                                                                                                                                                                                                                                                                                                                                                                                                                                                                                                                                                                                                                                                                                                                                                                                                                                                                                                                                                                                                                                                                                                                                    |   |                   |               |                                             |                   |                                             |    |                                     |          |                                      |                   |         |    |                   |     |                   |                   |         |   |                   |                   |   |                   |                |   |                   |        |    |                    |                         |    |                    |                  |    |                    |                 |    |                    |          |    |                    |          |    |                    |               |    |                    |                        |    |                    |                          |    |                    |               |    |                    |                 |    |                    |      |
| 5   | momseekcond_va__5                                                                          | HIV                                                                                                                                  |                                                                                                                                                                                                                                                                                                                                                                                                                                                                                                                                                                                                                                                                                                                                                                                                                                                                                                                                                                                                                                                                                                                                                                                                                                                                                                                                                                                                                                                                    |   |                   |               |                                             |                   |                                             |    |                                     |          |                                      |                   |         |    |                   |     |                   |                   |         |   |                   |                   |   |                   |                |   |                   |        |    |                    |                         |    |                    |                  |    |                    |                 |    |                    |          |    |                    |          |    |                    |               |    |                    |                        |    |                    |                          |    |                    |               |    |                    |                 |    |                    |      |
| 6   | momseekcond_va__6                                                                          | Malaria                                                                                                                              |                                                                                                                                                                                                                                                                                                                                                                                                                                                                                                                                                                                                                                                                                                                                                                                                                                                                                                                                                                                                                                                                                                                                                                                                                                                                                                                                                                                                                                                                    |   |                   |               |                                             |                   |                                             |    |                                     |          |                                      |                   |         |    |                   |     |                   |                   |         |   |                   |                   |   |                   |                |   |                   |        |    |                    |                         |    |                    |                  |    |                    |                 |    |                    |          |    |                    |          |    |                    |               |    |                    |                        |    |                    |                          |    |                    |               |    |                    |                 |    |                    |      |
| 7   | momseekcond_va__7                                                                          | Retained placenta                                                                                                                    |                                                                                                                                                                                                                                                                                                                                                                                                                                                                                                                                                                                                                                                                                                                                                                                                                                                                                                                                                                                                                                                                                                                                                                                                                                                                                                                                                                                                                                                                    |   |                   |               |                                             |                   |                                             |    |                                     |          |                                      |                   |         |    |                   |     |                   |                   |         |   |                   |                   |   |                   |                |   |                   |        |    |                    |                         |    |                    |                  |    |                    |                 |    |                    |          |    |                    |          |    |                    |               |    |                    |                        |    |                    |                          |    |                    |               |    |                    |                 |    |                    |      |
| 8   | momseekcond_va__8                                                                          | Heavy bleeding                                                                                                                       |                                                                                                                                                                                                                                                                                                                                                                                                                                                                                                                                                                                                                                                                                                                                                                                                                                                                                                                                                                                                                                                                                                                                                                                                                                                                                                                                                                                                                                                                    |   |                   |               |                                             |                   |                                             |    |                                     |          |                                      |                   |         |    |                   |     |                   |                   |         |   |                   |                   |   |                   |                |   |                   |        |    |                    |                         |    |                    |                  |    |                    |                 |    |                    |          |    |                    |          |    |                    |               |    |                    |                        |    |                    |                          |    |                    |               |    |                    |                 |    |                    |      |
| 9   | momseekcond_va__9                                                                          | Anemia                                                                                                                               |                                                                                                                                                                                                                                                                                                                                                                                                                                                                                                                                                                                                                                                                                                                                                                                                                                                                                                                                                                                                                                                                                                                                                                                                                                                                                                                                                                                                                                                                    |   |                   |               |                                             |                   |                                             |    |                                     |          |                                      |                   |         |    |                   |     |                   |                   |         |   |                   |                   |   |                   |                |   |                   |        |    |                    |                         |    |                    |                  |    |                    |                 |    |                    |          |    |                    |          |    |                    |               |    |                    |                        |    |                    |                          |    |                    |               |    |                    |                 |    |                    |      |
| 10  | momseekcond_va__10                                                                         | Surgical site infection                                                                                                              |                                                                                                                                                                                                                                                                                                                                                                                                                                                                                                                                                                                                                                                                                                                                                                                                                                                                                                                                                                                                                                                                                                                                                                                                                                                                                                                                                                                                                                                                    |   |                   |               |                                             |                   |                                             |    |                                     |          |                                      |                   |         |    |                   |     |                   |                   |         |   |                   |                   |   |                   |                |   |                   |        |    |                    |                         |    |                    |                  |    |                    |                 |    |                    |          |    |                    |          |    |                    |               |    |                    |                        |    |                    |                          |    |                    |               |    |                    |                 |    |                    |      |
| 11  | momseekcond_va__11                                                                         | Puerperal sepsis                                                                                                                     |                                                                                                                                                                                                                                                                                                                                                                                                                                                                                                                                                                                                                                                                                                                                                                                                                                                                                                                                                                                                                                                                                                                                                                                                                                                                                                                                                                                                                                                                    |   |                   |               |                                             |                   |                                             |    |                                     |          |                                      |                   |         |    |                   |     |                   |                   |         |   |                   |                   |   |                   |                |   |                   |        |    |                    |                         |    |                    |                  |    |                    |                 |    |                    |          |    |                    |          |    |                    |               |    |                    |                        |    |                    |                          |    |                    |               |    |                    |                 |    |                    |      |
| 12  | momseekcond_va__12                                                                         | Other infection                                                                                                                      |                                                                                                                                                                                                                                                                                                                                                                                                                                                                                                                                                                                                                                                                                                                                                                                                                                                                                                                                                                                                                                                                                                                                                                                                                                                                                                                                                                                                                                                                    |   |                   |               |                                             |                   |                                             |    |                                     |          |                                      |                   |         |    |                   |     |                   |                   |         |   |                   |                   |   |                   |                |   |                   |        |    |                    |                         |    |                    |                  |    |                    |                 |    |                    |          |    |                    |          |    |                    |               |    |                    |                        |    |                    |                          |    |                    |               |    |                    |                 |    |                    |      |
| 13  | momseekcond_va__13                                                                         | Diarrhea                                                                                                                             |                                                                                                                                                                                                                                                                                                                                                                                                                                                                                                                                                                                                                                                                                                                                                                                                                                                                                                                                                                                                                                                                                                                                                                                                                                                                                                                                                                                                                                                                    |   |                   |               |                                             |                   |                                             |    |                                     |          |                                      |                   |         |    |                   |     |                   |                   |         |   |                   |                   |   |                   |                |   |                   |        |    |                    |                         |    |                    |                  |    |                    |                 |    |                    |          |    |                    |          |    |                    |               |    |                    |                        |    |                    |                          |    |                    |               |    |                    |                 |    |                    |      |
| 14  | momseekcond_va__14                                                                         | Vomiting                                                                                                                             |                                                                                                                                                                                                                                                                                                                                                                                                                                                                                                                                                                                                                                                                                                                                                                                                                                                                                                                                                                                                                                                                                                                                                                                                                                                                                                                                                                                                                                                                    |   |                   |               |                                             |                   |                                             |    |                                     |          |                                      |                   |         |    |                   |     |                   |                   |         |   |                   |                   |   |                   |                |   |                   |        |    |                    |                         |    |                    |                  |    |                    |                 |    |                    |          |    |                    |          |    |                    |               |    |                    |                        |    |                    |                          |    |                    |               |    |                    |                 |    |                    |      |
| 15  | momseekcond_va__15                                                                         | PPD/psychosis                                                                                                                        |                                                                                                                                                                                                                                                                                                                                                                                                                                                                                                                                                                                                                                                                                                                                                                                                                                                                                                                                                                                                                                                                                                                                                                                                                                                                                                                                                                                                                                                                    |   |                   |               |                                             |                   |                                             |    |                                     |          |                                      |                   |         |    |                   |     |                   |                   |         |   |                   |                   |   |                   |                |   |                   |        |    |                    |                         |    |                    |                  |    |                    |                 |    |                    |          |    |                    |          |    |                    |               |    |                    |                        |    |                    |                          |    |                    |               |    |                    |                 |    |                    |      |
| 16  | momseekcond_va__16                                                                         | Needed another surgery                                                                                                               |                                                                                                                                                                                                                                                                                                                                                                                                                                                                                                                                                                                                                                                                                                                                                                                                                                                                                                                                                                                                                                                                                                                                                                                                                                                                                                                                                                                                                                                                    |   |                   |               |                                             |                   |                                             |    |                                     |          |                                      |                   |         |    |                   |     |                   |                   |         |   |                   |                   |   |                   |                |   |                   |        |    |                    |                         |    |                    |                  |    |                    |                 |    |                    |          |    |                    |          |    |                    |               |    |                    |                        |    |                    |                          |    |                    |               |    |                    |                 |    |                    |      |
| 17  | momseekcond_va__17                                                                         | Needed blood transfusion                                                                                                             |                                                                                                                                                                                                                                                                                                                                                                                                                                                                                                                                                                                                                                                                                                                                                                                                                                                                                                                                                                                                                                                                                                                                                                                                                                                                                                                                                                                                                                                                    |   |                   |               |                                             |                   |                                             |    |                                     |          |                                      |                   |         |    |                   |     |                   |                   |         |   |                   |                   |   |                   |                |   |                   |        |    |                    |                         |    |                    |                  |    |                    |                 |    |                    |          |    |                    |          |    |                    |               |    |                    |                        |    |                    |                          |    |                    |               |    |                    |                 |    |                    |      |
| 18  | momseekcond_va__18                                                                         | Needed oxygen                                                                                                                        |                                                                                                                                                                                                                                                                                                                                                                                                                                                                                                                                                                                                                                                                                                                                                                                                                                                                                                                                                                                                                                                                                                                                                                                                                                                                                                                                                                                                                                                                    |   |                   |               |                                             |                   |                                             |    |                                     |          |                                      |                   |         |    |                   |     |                   |                   |         |   |                   |                   |   |                   |                |   |                   |        |    |                    |                         |    |                    |                  |    |                    |                 |    |                    |          |    |                    |          |    |                    |               |    |                    |                        |    |                    |                          |    |                    |               |    |                    |                 |    |                    |      |
| 98  | momseekcond_va__98                                                                         | Other (specify)                                                                                                                      |                                                                                                                                                                                                                                                                                                                                                                                                                                                                                                                                                                                                                                                                                                                                                                                                                                                                                                                                                                                                                                                                                                                                                                                                                                                                                                                                                                                                                                                                    |   |                   |               |                                             |                   |                                             |    |                                     |          |                                      |                   |         |    |                   |     |                   |                   |         |   |                   |                   |   |                   |                |   |                   |        |    |                    |                         |    |                    |                  |    |                    |                 |    |                    |          |    |                    |          |    |                    |               |    |                    |                        |    |                    |                          |    |                    |               |    |                    |                 |    |                    |      |
| 99  | momseekcond_va__99                                                                         | None                                                                                                                                 |                                                                                                                                                                                                                                                                                                                                                                                                                                                                                                                                                                                                                                                                                                                                                                                                                                                                                                                                                                                                                                                                                                                                                                                                                                                                                                                                                                                                                                                                    |   |                   |               |                                             |                   |                                             |    |                                     |          |                                      |                   |         |    |                   |     |                   |                   |         |   |                   |                   |   |                   |                |   |                   |        |    |                    |                         |    |                    |                  |    |                    |                 |    |                    |          |    |                    |          |    |                    |               |    |                    |                        |    |                    |                          |    |                    |               |    |                    |                 |    |                    |      |
| 324 | <p>[momseekcondother_va]</p> <p>Show the field ONLY if:<br/>[momseekcond_va(98)] = '1'</p> | <p>Other condition:</p>                                                                                                              | <p>text</p>                                                                                                                                                                                                                                                                                                                                                                                                                                                                                                                                                                                                                                                                                                                                                                                                                                                                                                                                                                                                                                                                                                                                                                                                                                                                                                                                                                                                                                                        |   |                   |               |                                             |                   |                                             |    |                                     |          |                                      |                   |         |    |                   |     |                   |                   |         |   |                   |                   |   |                   |                |   |                   |        |    |                    |                         |    |                    |                  |    |                    |                 |    |                    |          |    |                    |          |    |                    |               |    |                    |                        |    |                    |                          |    |                    |               |    |                    |                 |    |                    |      |
| 325 | <p>[id10077_m]</p>                                                                         | <p>Section Header: <i>History of injuries/accidents</i></p> <p>Did she suffer from any injury or accident that led to her death?</p> | <p>radio</p> <table border="1"> <tr><td>1</td><td>Yes</td></tr> <tr><td>0</td><td>No</td></tr> <tr><td>99</td><td>Doesn't know</td></tr> <tr><td>88</td><td>Refused to answer</td></tr> </table>                                                                                                                                                                                                                                                                                                                                                                                                                                                                                                                                                                                                                                                                                                                                                                                                                                                                                                                                                                                                                                                                                                                                                                                                                                                                   | 1 | Yes               | 0             | No                                          | 99                | Doesn't know                                | 88 | Refused to answer                   |          |                                      |                   |         |    |                   |     |                   |                   |         |   |                   |                   |   |                   |                |   |                   |        |    |                    |                         |    |                    |                  |    |                    |                 |    |                    |          |    |                    |          |    |                    |               |    |                    |                        |    |                    |                          |    |                    |               |    |                    |                 |    |                    |      |
| 1   | Yes                                                                                        |                                                                                                                                      |                                                                                                                                                                                                                                                                                                                                                                                                                                                                                                                                                                                                                                                                                                                                                                                                                                                                                                                                                                                                                                                                                                                                                                                                                                                                                                                                                                                                                                                                    |   |                   |               |                                             |                   |                                             |    |                                     |          |                                      |                   |         |    |                   |     |                   |                   |         |   |                   |                   |   |                   |                |   |                   |        |    |                    |                         |    |                    |                  |    |                    |                 |    |                    |          |    |                    |          |    |                    |               |    |                    |                        |    |                    |                          |    |                    |               |    |                    |                 |    |                    |      |
| 0   | No                                                                                         |                                                                                                                                      |                                                                                                                                                                                                                                                                                                                                                                                                                                                                                                                                                                                                                                                                                                                                                                                                                                                                                                                                                                                                                                                                                                                                                                                                                                                                                                                                                                                                                                                                    |   |                   |               |                                             |                   |                                             |    |                                     |          |                                      |                   |         |    |                   |     |                   |                   |         |   |                   |                   |   |                   |                |   |                   |        |    |                    |                         |    |                    |                  |    |                    |                 |    |                    |          |    |                    |          |    |                    |               |    |                    |                        |    |                    |                          |    |                    |               |    |                    |                 |    |                    |      |
| 99  | Doesn't know                                                                               |                                                                                                                                      |                                                                                                                                                                                                                                                                                                                                                                                                                                                                                                                                                                                                                                                                                                                                                                                                                                                                                                                                                                                                                                                                                                                                                                                                                                                                                                                                                                                                                                                                    |   |                   |               |                                             |                   |                                             |    |                                     |          |                                      |                   |         |    |                   |     |                   |                   |         |   |                   |                   |   |                   |                |   |                   |        |    |                    |                         |    |                    |                  |    |                    |                 |    |                    |          |    |                    |          |    |                    |               |    |                    |                        |    |                    |                          |    |                    |               |    |                    |                 |    |                    |      |
| 88  | Refused to answer                                                                          |                                                                                                                                      |                                                                                                                                                                                                                                                                                                                                                                                                                                                                                                                                                                                                                                                                                                                                                                                                                                                                                                                                                                                                                                                                                                                                                                                                                                                                                                                                                                                                                                                                    |   |                   |               |                                             |                   |                                             |    |                                     |          |                                      |                   |         |    |                   |     |                   |                   |         |   |                   |                   |   |                   |                |   |                   |        |    |                    |                         |    |                    |                  |    |                    |                 |    |                    |          |    |                    |          |    |                    |               |    |                    |                        |    |                    |                          |    |                    |               |    |                    |                 |    |                    |      |
| 326 | <p>[id10079_m]</p> <p>Show the field ONLY if:<br/>[id10077_m]='1'</p>                      | <p>Section Header: <i>Injuries and accidents detail</i></p> <p>Was it a road traffic accident?</p>                                   | <p>radio</p> <table border="1"> <tr><td>1</td><td>Yes</td></tr> <tr><td>0</td><td>No</td></tr> <tr><td>99</td><td>Doesn't know</td></tr> <tr><td>88</td><td>Refused to answer</td></tr> </table>                                                                                                                                                                                                                                                                                                                                                                                                                                                                                                                                                                                                                                                                                                                                                                                                                                                                                                                                                                                                                                                                                                                                                                                                                                                                   | 1 | Yes               | 0             | No                                          | 99                | Doesn't know                                | 88 | Refused to answer                   |          |                                      |                   |         |    |                   |     |                   |                   |         |   |                   |                   |   |                   |                |   |                   |        |    |                    |                         |    |                    |                  |    |                    |                 |    |                    |          |    |                    |          |    |                    |               |    |                    |                        |    |                    |                          |    |                    |               |    |                    |                 |    |                    |      |
| 1   | Yes                                                                                        |                                                                                                                                      |                                                                                                                                                                                                                                                                                                                                                                                                                                                                                                                                                                                                                                                                                                                                                                                                                                                                                                                                                                                                                                                                                                                                                                                                                                                                                                                                                                                                                                                                    |   |                   |               |                                             |                   |                                             |    |                                     |          |                                      |                   |         |    |                   |     |                   |                   |         |   |                   |                   |   |                   |                |   |                   |        |    |                    |                         |    |                    |                  |    |                    |                 |    |                    |          |    |                    |          |    |                    |               |    |                    |                        |    |                    |                          |    |                    |               |    |                    |                 |    |                    |      |
| 0   | No                                                                                         |                                                                                                                                      |                                                                                                                                                                                                                                                                                                                                                                                                                                                                                                                                                                                                                                                                                                                                                                                                                                                                                                                                                                                                                                                                                                                                                                                                                                                                                                                                                                                                                                                                    |   |                   |               |                                             |                   |                                             |    |                                     |          |                                      |                   |         |    |                   |     |                   |                   |         |   |                   |                   |   |                   |                |   |                   |        |    |                    |                         |    |                    |                  |    |                    |                 |    |                    |          |    |                    |          |    |                    |               |    |                    |                        |    |                    |                          |    |                    |               |    |                    |                 |    |                    |      |
| 99  | Doesn't know                                                                               |                                                                                                                                      |                                                                                                                                                                                                                                                                                                                                                                                                                                                                                                                                                                                                                                                                                                                                                                                                                                                                                                                                                                                                                                                                                                                                                                                                                                                                                                                                                                                                                                                                    |   |                   |               |                                             |                   |                                             |    |                                     |          |                                      |                   |         |    |                   |     |                   |                   |         |   |                   |                   |   |                   |                |   |                   |        |    |                    |                         |    |                    |                  |    |                    |                 |    |                    |          |    |                    |          |    |                    |               |    |                    |                        |    |                    |                          |    |                    |               |    |                    |                 |    |                    |      |
| 88  | Refused to answer                                                                          |                                                                                                                                      |                                                                                                                                                                                                                                                                                                                                                                                                                                                                                                                                                                                                                                                                                                                                                                                                                                                                                                                                                                                                                                                                                                                                                                                                                                                                                                                                                                                                                                                                    |   |                   |               |                                             |                   |                                             |    |                                     |          |                                      |                   |         |    |                   |     |                   |                   |         |   |                   |                   |   |                   |                |   |                   |        |    |                    |                         |    |                    |                  |    |                    |                 |    |                    |          |    |                    |          |    |                    |               |    |                    |                        |    |                    |                          |    |                    |               |    |                    |                 |    |                    |      |
| 327 | <p>[id10080_m]</p> <p>Show the field ONLY if:<br/>[id10079_m] = '1'</p>                    | <p>What was her role in the road traffic accident?</p>                                                                               | <p>radio</p> <table border="1"> <tr><td>1</td><td>Pedestrian</td></tr> <tr><td>2</td><td>Driver or passenger in car or light vehicle</td></tr> <tr><td>3</td><td>Driver or passenger in bus or heavy vehicle</td></tr> <tr><td>4</td><td>Driver or passenger on a motorcycle</td></tr> <tr><td>5</td><td>Driver or passenger on a pedal cycle</td></tr> <tr><td>6</td><td>Other</td></tr> <tr><td>99</td><td>Doesn't know</td></tr> <tr><td>88</td><td>Refused to answer</td></tr> </table>                                                                                                                                                                                                                                                                                                                                                                                                                                                                                                                                                                                                                                                                                                                                                                                                                                                                                                                                                                        | 1 | Pedestrian        | 2             | Driver or passenger in car or light vehicle | 3                 | Driver or passenger in bus or heavy vehicle | 4  | Driver or passenger on a motorcycle | 5        | Driver or passenger on a pedal cycle | 6                 | Other   | 99 | Doesn't know      | 88  | Refused to answer |                   |         |   |                   |                   |   |                   |                |   |                   |        |    |                    |                         |    |                    |                  |    |                    |                 |    |                    |          |    |                    |          |    |                    |               |    |                    |                        |    |                    |                          |    |                    |               |    |                    |                 |    |                    |      |
| 1   | Pedestrian                                                                                 |                                                                                                                                      |                                                                                                                                                                                                                                                                                                                                                                                                                                                                                                                                                                                                                                                                                                                                                                                                                                                                                                                                                                                                                                                                                                                                                                                                                                                                                                                                                                                                                                                                    |   |                   |               |                                             |                   |                                             |    |                                     |          |                                      |                   |         |    |                   |     |                   |                   |         |   |                   |                   |   |                   |                |   |                   |        |    |                    |                         |    |                    |                  |    |                    |                 |    |                    |          |    |                    |          |    |                    |               |    |                    |                        |    |                    |                          |    |                    |               |    |                    |                 |    |                    |      |
| 2   | Driver or passenger in car or light vehicle                                                |                                                                                                                                      |                                                                                                                                                                                                                                                                                                                                                                                                                                                                                                                                                                                                                                                                                                                                                                                                                                                                                                                                                                                                                                                                                                                                                                                                                                                                                                                                                                                                                                                                    |   |                   |               |                                             |                   |                                             |    |                                     |          |                                      |                   |         |    |                   |     |                   |                   |         |   |                   |                   |   |                   |                |   |                   |        |    |                    |                         |    |                    |                  |    |                    |                 |    |                    |          |    |                    |          |    |                    |               |    |                    |                        |    |                    |                          |    |                    |               |    |                    |                 |    |                    |      |
| 3   | Driver or passenger in bus or heavy vehicle                                                |                                                                                                                                      |                                                                                                                                                                                                                                                                                                                                                                                                                                                                                                                                                                                                                                                                                                                                                                                                                                                                                                                                                                                                                                                                                                                                                                                                                                                                                                                                                                                                                                                                    |   |                   |               |                                             |                   |                                             |    |                                     |          |                                      |                   |         |    |                   |     |                   |                   |         |   |                   |                   |   |                   |                |   |                   |        |    |                    |                         |    |                    |                  |    |                    |                 |    |                    |          |    |                    |          |    |                    |               |    |                    |                        |    |                    |                          |    |                    |               |    |                    |                 |    |                    |      |
| 4   | Driver or passenger on a motorcycle                                                        |                                                                                                                                      |                                                                                                                                                                                                                                                                                                                                                                                                                                                                                                                                                                                                                                                                                                                                                                                                                                                                                                                                                                                                                                                                                                                                                                                                                                                                                                                                                                                                                                                                    |   |                   |               |                                             |                   |                                             |    |                                     |          |                                      |                   |         |    |                   |     |                   |                   |         |   |                   |                   |   |                   |                |   |                   |        |    |                    |                         |    |                    |                  |    |                    |                 |    |                    |          |    |                    |          |    |                    |               |    |                    |                        |    |                    |                          |    |                    |               |    |                    |                 |    |                    |      |
| 5   | Driver or passenger on a pedal cycle                                                       |                                                                                                                                      |                                                                                                                                                                                                                                                                                                                                                                                                                                                                                                                                                                                                                                                                                                                                                                                                                                                                                                                                                                                                                                                                                                                                                                                                                                                                                                                                                                                                                                                                    |   |                   |               |                                             |                   |                                             |    |                                     |          |                                      |                   |         |    |                   |     |                   |                   |         |   |                   |                   |   |                   |                |   |                   |        |    |                    |                         |    |                    |                  |    |                    |                 |    |                    |          |    |                    |          |    |                    |               |    |                    |                        |    |                    |                          |    |                    |               |    |                    |                 |    |                    |      |
| 6   | Other                                                                                      |                                                                                                                                      |                                                                                                                                                                                                                                                                                                                                                                                                                                                                                                                                                                                                                                                                                                                                                                                                                                                                                                                                                                                                                                                                                                                                                                                                                                                                                                                                                                                                                                                                    |   |                   |               |                                             |                   |                                             |    |                                     |          |                                      |                   |         |    |                   |     |                   |                   |         |   |                   |                   |   |                   |                |   |                   |        |    |                    |                         |    |                    |                  |    |                    |                 |    |                    |          |    |                    |          |    |                    |               |    |                    |                        |    |                    |                          |    |                    |               |    |                    |                 |    |                    |      |
| 99  | Doesn't know                                                                               |                                                                                                                                      |                                                                                                                                                                                                                                                                                                                                                                                                                                                                                                                                                                                                                                                                                                                                                                                                                                                                                                                                                                                                                                                                                                                                                                                                                                                                                                                                                                                                                                                                    |   |                   |               |                                             |                   |                                             |    |                                     |          |                                      |                   |         |    |                   |     |                   |                   |         |   |                   |                   |   |                   |                |   |                   |        |    |                    |                         |    |                    |                  |    |                    |                 |    |                    |          |    |                    |          |    |                    |               |    |                    |                        |    |                    |                          |    |                    |               |    |                    |                 |    |                    |      |
| 88  | Refused to answer                                                                          |                                                                                                                                      |                                                                                                                                                                                                                                                                                                                                                                                                                                                                                                                                                                                                                                                                                                                                                                                                                                                                                                                                                                                                                                                                                                                                                                                                                                                                                                                                                                                                                                                                    |   |                   |               |                                             |                   |                                             |    |                                     |          |                                      |                   |         |    |                   |     |                   |                   |         |   |                   |                   |   |                   |                |   |                   |        |    |                    |                         |    |                    |                  |    |                    |                 |    |                    |          |    |                    |          |    |                    |               |    |                    |                        |    |                    |                          |    |                    |               |    |                    |                 |    |                    |      |

|     |                                                                                                         |                                                                                                                                                                                         |                                                                                                                                                                                                                                                                                                                                                                                                                                       |   |            |   |                   |    |                      |    |                      |    |              |    |                   |   |       |    |              |    |                   |
|-----|---------------------------------------------------------------------------------------------------------|-----------------------------------------------------------------------------------------------------------------------------------------------------------------------------------------|---------------------------------------------------------------------------------------------------------------------------------------------------------------------------------------------------------------------------------------------------------------------------------------------------------------------------------------------------------------------------------------------------------------------------------------|---|------------|---|-------------------|----|----------------------|----|----------------------|----|--------------|----|-------------------|---|-------|----|--------------|----|-------------------|
| 328 | [id10081_m]<br>Show the field ONLY if:<br>[id10079_m] = '1'                                             | What was the counterpart that was hit during the road traffic accident?                                                                                                                 | radio<br><table border="1"> <tr><td>1</td><td>Pedestrian</td></tr> <tr><td>2</td><td>Stationary object</td></tr> <tr><td>3</td><td>Car or light vehicle</td></tr> <tr><td>4</td><td>Bus or heavy vehicle</td></tr> <tr><td>5</td><td>Motorcycle</td></tr> <tr><td>6</td><td>Pedal cycle</td></tr> <tr><td>7</td><td>Other</td></tr> <tr><td>99</td><td>Doesn't know</td></tr> <tr><td>88</td><td>Refused to answer</td></tr> </table> | 1 | Pedestrian | 2 | Stationary object | 3  | Car or light vehicle | 4  | Bus or heavy vehicle | 5  | Motorcycle   | 6  | Pedal cycle       | 7 | Other | 99 | Doesn't know | 88 | Refused to answer |
| 1   | Pedestrian                                                                                              |                                                                                                                                                                                         |                                                                                                                                                                                                                                                                                                                                                                                                                                       |   |            |   |                   |    |                      |    |                      |    |              |    |                   |   |       |    |              |    |                   |
| 2   | Stationary object                                                                                       |                                                                                                                                                                                         |                                                                                                                                                                                                                                                                                                                                                                                                                                       |   |            |   |                   |    |                      |    |                      |    |              |    |                   |   |       |    |              |    |                   |
| 3   | Car or light vehicle                                                                                    |                                                                                                                                                                                         |                                                                                                                                                                                                                                                                                                                                                                                                                                       |   |            |   |                   |    |                      |    |                      |    |              |    |                   |   |       |    |              |    |                   |
| 4   | Bus or heavy vehicle                                                                                    |                                                                                                                                                                                         |                                                                                                                                                                                                                                                                                                                                                                                                                                       |   |            |   |                   |    |                      |    |                      |    |              |    |                   |   |       |    |              |    |                   |
| 5   | Motorcycle                                                                                              |                                                                                                                                                                                         |                                                                                                                                                                                                                                                                                                                                                                                                                                       |   |            |   |                   |    |                      |    |                      |    |              |    |                   |   |       |    |              |    |                   |
| 6   | Pedal cycle                                                                                             |                                                                                                                                                                                         |                                                                                                                                                                                                                                                                                                                                                                                                                                       |   |            |   |                   |    |                      |    |                      |    |              |    |                   |   |       |    |              |    |                   |
| 7   | Other                                                                                                   |                                                                                                                                                                                         |                                                                                                                                                                                                                                                                                                                                                                                                                                       |   |            |   |                   |    |                      |    |                      |    |              |    |                   |   |       |    |              |    |                   |
| 99  | Doesn't know                                                                                            |                                                                                                                                                                                         |                                                                                                                                                                                                                                                                                                                                                                                                                                       |   |            |   |                   |    |                      |    |                      |    |              |    |                   |   |       |    |              |    |                   |
| 88  | Refused to answer                                                                                       |                                                                                                                                                                                         |                                                                                                                                                                                                                                                                                                                                                                                                                                       |   |            |   |                   |    |                      |    |                      |    |              |    |                   |   |       |    |              |    |                   |
| 329 | [id10082_m]<br>Show the field ONLY if:<br>[id10079_m] = '0' or [id10079_m] = '99' or [id10079_m] = '88' | Was she injured in a non-road transport accident?                                                                                                                                       | radio<br><table border="1"> <tr><td>1</td><td>Yes</td></tr> <tr><td>0</td><td>No</td></tr> <tr><td>99</td><td>Doesn't know</td></tr> <tr><td>88</td><td>Refused to answer</td></tr> </table>                                                                                                                                                                                                                                          | 1 | Yes        | 0 | No                | 99 | Doesn't know         | 88 | Refused to answer    |    |              |    |                   |   |       |    |              |    |                   |
| 1   | Yes                                                                                                     |                                                                                                                                                                                         |                                                                                                                                                                                                                                                                                                                                                                                                                                       |   |            |   |                   |    |                      |    |                      |    |              |    |                   |   |       |    |              |    |                   |
| 0   | No                                                                                                      |                                                                                                                                                                                         |                                                                                                                                                                                                                                                                                                                                                                                                                                       |   |            |   |                   |    |                      |    |                      |    |              |    |                   |   |       |    |              |    |                   |
| 99  | Doesn't know                                                                                            |                                                                                                                                                                                         |                                                                                                                                                                                                                                                                                                                                                                                                                                       |   |            |   |                   |    |                      |    |                      |    |              |    |                   |   |       |    |              |    |                   |
| 88  | Refused to answer                                                                                       |                                                                                                                                                                                         |                                                                                                                                                                                                                                                                                                                                                                                                                                       |   |            |   |                   |    |                      |    |                      |    |              |    |                   |   |       |    |              |    |                   |
| 330 | [id10083_m]<br>Show the field ONLY if:<br>[id10079_m] = '0' or [id10079_m] = '99' or [id10079_m] = '88' | Was she injured in a fall?<br><i>This includes accidents and cases where it is unknown if it was an accident or whether there was intentional violence.</i>                             | radio<br><table border="1"> <tr><td>1</td><td>Yes</td></tr> <tr><td>0</td><td>No</td></tr> <tr><td>99</td><td>Doesn't know</td></tr> <tr><td>88</td><td>Refused to answer</td></tr> </table>                                                                                                                                                                                                                                          | 1 | Yes        | 0 | No                | 99 | Doesn't know         | 88 | Refused to answer    |    |              |    |                   |   |       |    |              |    |                   |
| 1   | Yes                                                                                                     |                                                                                                                                                                                         |                                                                                                                                                                                                                                                                                                                                                                                                                                       |   |            |   |                   |    |                      |    |                      |    |              |    |                   |   |       |    |              |    |                   |
| 0   | No                                                                                                      |                                                                                                                                                                                         |                                                                                                                                                                                                                                                                                                                                                                                                                                       |   |            |   |                   |    |                      |    |                      |    |              |    |                   |   |       |    |              |    |                   |
| 99  | Doesn't know                                                                                            |                                                                                                                                                                                         |                                                                                                                                                                                                                                                                                                                                                                                                                                       |   |            |   |                   |    |                      |    |                      |    |              |    |                   |   |       |    |              |    |                   |
| 88  | Refused to answer                                                                                       |                                                                                                                                                                                         |                                                                                                                                                                                                                                                                                                                                                                                                                                       |   |            |   |                   |    |                      |    |                      |    |              |    |                   |   |       |    |              |    |                   |
| 331 | [id10084_m]<br>Show the field ONLY if:<br>[id10079_m] = '0' or [id10079_m] = '99' or [id10079_m] = '88' | Was there any poisoning?<br><i>This includes accidents and cases where it is unknown if it was an accident or whether there was intentional violence.</i>                               | radio<br><table border="1"> <tr><td>1</td><td>Yes</td></tr> <tr><td>0</td><td>No</td></tr> <tr><td>99</td><td>Doesn't know</td></tr> <tr><td>88</td><td>Refused to answer</td></tr> </table>                                                                                                                                                                                                                                          | 1 | Yes        | 0 | No                | 99 | Doesn't know         | 88 | Refused to answer    |    |              |    |                   |   |       |    |              |    |                   |
| 1   | Yes                                                                                                     |                                                                                                                                                                                         |                                                                                                                                                                                                                                                                                                                                                                                                                                       |   |            |   |                   |    |                      |    |                      |    |              |    |                   |   |       |    |              |    |                   |
| 0   | No                                                                                                      |                                                                                                                                                                                         |                                                                                                                                                                                                                                                                                                                                                                                                                                       |   |            |   |                   |    |                      |    |                      |    |              |    |                   |   |       |    |              |    |                   |
| 99  | Doesn't know                                                                                            |                                                                                                                                                                                         |                                                                                                                                                                                                                                                                                                                                                                                                                                       |   |            |   |                   |    |                      |    |                      |    |              |    |                   |   |       |    |              |    |                   |
| 88  | Refused to answer                                                                                       |                                                                                                                                                                                         |                                                                                                                                                                                                                                                                                                                                                                                                                                       |   |            |   |                   |    |                      |    |                      |    |              |    |                   |   |       |    |              |    |                   |
| 332 | [id10085_m]<br>Show the field ONLY if:<br>[id10079_m] = '0' or [id10079_m] = '99' or [id10079_m] = '88' | Did she die of drowning?<br><i>This includes accidents and cases where it is unknown if it was an accident or whether there was intentional violence.</i>                               | radio<br><table border="1"> <tr><td>1</td><td>Yes</td></tr> <tr><td>0</td><td>No</td></tr> <tr><td>99</td><td>Doesn't know</td></tr> <tr><td>88</td><td>Refused to answer</td></tr> </table>                                                                                                                                                                                                                                          | 1 | Yes        | 0 | No                | 99 | Doesn't know         | 88 | Refused to answer    |    |              |    |                   |   |       |    |              |    |                   |
| 1   | Yes                                                                                                     |                                                                                                                                                                                         |                                                                                                                                                                                                                                                                                                                                                                                                                                       |   |            |   |                   |    |                      |    |                      |    |              |    |                   |   |       |    |              |    |                   |
| 0   | No                                                                                                      |                                                                                                                                                                                         |                                                                                                                                                                                                                                                                                                                                                                                                                                       |   |            |   |                   |    |                      |    |                      |    |              |    |                   |   |       |    |              |    |                   |
| 99  | Doesn't know                                                                                            |                                                                                                                                                                                         |                                                                                                                                                                                                                                                                                                                                                                                                                                       |   |            |   |                   |    |                      |    |                      |    |              |    |                   |   |       |    |              |    |                   |
| 88  | Refused to answer                                                                                       |                                                                                                                                                                                         |                                                                                                                                                                                                                                                                                                                                                                                                                                       |   |            |   |                   |    |                      |    |                      |    |              |    |                   |   |       |    |              |    |                   |
| 333 | [id10086_m]<br>Show the field ONLY if:<br>[id10079_m] = '0' or [id10079_m] = '99' or [id10079_m] = '88' | Was she injured by a bite or sting by venomous animal?<br><i>This includes accidents and cases where it is unknown if it was an accident or whether there was intentional violence.</i> | radio<br><table border="1"> <tr><td>1</td><td>Yes</td></tr> <tr><td>0</td><td>No</td></tr> <tr><td>99</td><td>Doesn't know</td></tr> <tr><td>88</td><td>Refused to answer</td></tr> </table>                                                                                                                                                                                                                                          | 1 | Yes        | 0 | No                | 99 | Doesn't know         | 88 | Refused to answer    |    |              |    |                   |   |       |    |              |    |                   |
| 1   | Yes                                                                                                     |                                                                                                                                                                                         |                                                                                                                                                                                                                                                                                                                                                                                                                                       |   |            |   |                   |    |                      |    |                      |    |              |    |                   |   |       |    |              |    |                   |
| 0   | No                                                                                                      |                                                                                                                                                                                         |                                                                                                                                                                                                                                                                                                                                                                                                                                       |   |            |   |                   |    |                      |    |                      |    |              |    |                   |   |       |    |              |    |                   |
| 99  | Doesn't know                                                                                            |                                                                                                                                                                                         |                                                                                                                                                                                                                                                                                                                                                                                                                                       |   |            |   |                   |    |                      |    |                      |    |              |    |                   |   |       |    |              |    |                   |
| 88  | Refused to answer                                                                                       |                                                                                                                                                                                         |                                                                                                                                                                                                                                                                                                                                                                                                                                       |   |            |   |                   |    |                      |    |                      |    |              |    |                   |   |       |    |              |    |                   |
| 334 | [id10087_m]<br>Show the field ONLY if:<br>[id10086_m] = '0' or [id10086_m] = '99' or [id10086_m] = '88' | Was she injured by an animal or insect (non-venomous)?                                                                                                                                  | radio<br><table border="1"> <tr><td>1</td><td>Yes</td></tr> <tr><td>0</td><td>No</td></tr> <tr><td>99</td><td>Doesn't know</td></tr> <tr><td>88</td><td>Refused to answer</td></tr> </table>                                                                                                                                                                                                                                          | 1 | Yes        | 0 | No                | 99 | Doesn't know         | 88 | Refused to answer    |    |              |    |                   |   |       |    |              |    |                   |
| 1   | Yes                                                                                                     |                                                                                                                                                                                         |                                                                                                                                                                                                                                                                                                                                                                                                                                       |   |            |   |                   |    |                      |    |                      |    |              |    |                   |   |       |    |              |    |                   |
| 0   | No                                                                                                      |                                                                                                                                                                                         |                                                                                                                                                                                                                                                                                                                                                                                                                                       |   |            |   |                   |    |                      |    |                      |    |              |    |                   |   |       |    |              |    |                   |
| 99  | Doesn't know                                                                                            |                                                                                                                                                                                         |                                                                                                                                                                                                                                                                                                                                                                                                                                       |   |            |   |                   |    |                      |    |                      |    |              |    |                   |   |       |    |              |    |                   |
| 88  | Refused to answer                                                                                       |                                                                                                                                                                                         |                                                                                                                                                                                                                                                                                                                                                                                                                                       |   |            |   |                   |    |                      |    |                      |    |              |    |                   |   |       |    |              |    |                   |
| 335 | [id10088_m]<br>Show the field ONLY if:<br>[id10086_m] = '1' or [id10087_m] = '1'                        | What was the animal/insect?                                                                                                                                                             | radio<br><table border="1"> <tr><td>1</td><td>Dog</td></tr> <tr><td>2</td><td>Snake</td></tr> <tr><td>3</td><td>Insect or scorpion</td></tr> <tr><td>4</td><td>Other</td></tr> <tr><td>99</td><td>Doesn't know</td></tr> <tr><td>88</td><td>Refused to answer</td></tr> </table>                                                                                                                                                      | 1 | Dog        | 2 | Snake             | 3  | Insect or scorpion   | 4  | Other                | 99 | Doesn't know | 88 | Refused to answer |   |       |    |              |    |                   |
| 1   | Dog                                                                                                     |                                                                                                                                                                                         |                                                                                                                                                                                                                                                                                                                                                                                                                                       |   |            |   |                   |    |                      |    |                      |    |              |    |                   |   |       |    |              |    |                   |
| 2   | Snake                                                                                                   |                                                                                                                                                                                         |                                                                                                                                                                                                                                                                                                                                                                                                                                       |   |            |   |                   |    |                      |    |                      |    |              |    |                   |   |       |    |              |    |                   |
| 3   | Insect or scorpion                                                                                      |                                                                                                                                                                                         |                                                                                                                                                                                                                                                                                                                                                                                                                                       |   |            |   |                   |    |                      |    |                      |    |              |    |                   |   |       |    |              |    |                   |
| 4   | Other                                                                                                   |                                                                                                                                                                                         |                                                                                                                                                                                                                                                                                                                                                                                                                                       |   |            |   |                   |    |                      |    |                      |    |              |    |                   |   |       |    |              |    |                   |
| 99  | Doesn't know                                                                                            |                                                                                                                                                                                         |                                                                                                                                                                                                                                                                                                                                                                                                                                       |   |            |   |                   |    |                      |    |                      |    |              |    |                   |   |       |    |              |    |                   |
| 88  | Refused to answer                                                                                       |                                                                                                                                                                                         |                                                                                                                                                                                                                                                                                                                                                                                                                                       |   |            |   |                   |    |                      |    |                      |    |              |    |                   |   |       |    |              |    |                   |

|     |                                                                                                         |                                                |                                                                   |
|-----|---------------------------------------------------------------------------------------------------------|------------------------------------------------|-------------------------------------------------------------------|
| 336 | [id10089_m]<br>Show the field ONLY if:<br>[id10079_m] = '0' or [id10079_m] = '99' or [id10079_m] = '88' | Was she injured by burns/fire?                 | radio<br>1 Yes<br>0 No<br>99 Doesn't know<br>88 Refused to answer |
| 337 | [id10090_m]<br>Show the field ONLY if:<br>[id10079_m] = '0' or [id10079_m] = '99' or [id10079_m] = '88' | Was she subject to violence (homicide, abuse)? | radio<br>1 Yes<br>0 No<br>99 Doesn't know<br>88 Refused to answer |
| 338 | [id10091_m]<br>Show the field ONLY if:<br>[id10079_m] = '0' or [id10079_m] = '99' or [id10079_m] = '88' | Was she injured by a firearm?                  | radio<br>1 Yes<br>0 No<br>99 Doesn't know<br>88 Refused to answer |
| 339 | [id10092_m]<br>Show the field ONLY if:<br>[id10079_m] = '0' or [id10079_m] = '99' or [id10079_m] = '88' | Was she stabbed, cut or pierced?               | radio<br>1 Yes<br>0 No<br>99 Doesn't know<br>88 Refused to answer |
| 340 | [id10093_m]<br>Show the field ONLY if:<br>[id10079_m] = '0' or [id10079_m] = '99' or [id10079_m] = '88' | Was she strangled?                             | radio<br>1 Yes<br>0 No<br>99 Doesn't know<br>88 Refused to answer |
| 341 | [id10094_m]<br>Show the field ONLY if:<br>[id10079_m] = '0' or [id10079_m] = '99' or [id10079_m] = '88' | Was she injured by a blunt force?              | radio<br>1 Yes<br>0 No<br>99 Doesn't know<br>88 Refused to answer |
| 342 | [id10095_m]<br>Show the field ONLY if:<br>[id10079_m] = '0' or [id10079_m] = '99' or [id10079_m] = '88' | Was she injured by a force of nature?          | radio<br>1 Yes<br>0 No<br>99 Doesn't know<br>88 Refused to answer |
| 343 | [id10096_m]<br>Show the field ONLY if:<br>[id10079_m] = '0' or [id10079_m] = '99' or [id10079_m] = '88' | Was it electrocution?                          | radio<br>1 Yes<br>0 No<br>99 Doesn't know<br>88 Refused to answer |
| 344 | [id10097_m]<br>Show the field ONLY if:<br>[id10079_m] = '0' or [id10079_m] = '99' or [id10079_m] = '88' | Did she encounter any other injury?            | radio<br>1 Yes<br>0 No<br>99 Doesn't know<br>88 Refused to answer |

|     |                                                                                                                                                                             |                                                                                                                                                                                                                                                                                                  |                                                                                                                                                                                              |   |     |   |    |    |              |    |                   |
|-----|-----------------------------------------------------------------------------------------------------------------------------------------------------------------------------|--------------------------------------------------------------------------------------------------------------------------------------------------------------------------------------------------------------------------------------------------------------------------------------------------|----------------------------------------------------------------------------------------------------------------------------------------------------------------------------------------------|---|-----|---|----|----|--------------|----|-------------------|
| 345 | [id10098_m]<br>Show the field ONLY if:<br>[id10079_m] = '0' or [id10079_m] = '99' or [id10079_m] = '88'                                                                     | Was the injury accidental?                                                                                                                                                                                                                                                                       | radio<br><table border="1"> <tr><td>1</td><td>Yes</td></tr> <tr><td>0</td><td>No</td></tr> <tr><td>99</td><td>Doesn't know</td></tr> <tr><td>88</td><td>Refused to answer</td></tr> </table> | 1 | Yes | 0 | No | 99 | Doesn't know | 88 | Refused to answer |
| 1   | Yes                                                                                                                                                                         |                                                                                                                                                                                                                                                                                                  |                                                                                                                                                                                              |   |     |   |    |    |              |    |                   |
| 0   | No                                                                                                                                                                          |                                                                                                                                                                                                                                                                                                  |                                                                                                                                                                                              |   |     |   |    |    |              |    |                   |
| 99  | Doesn't know                                                                                                                                                                |                                                                                                                                                                                                                                                                                                  |                                                                                                                                                                                              |   |     |   |    |    |              |    |                   |
| 88  | Refused to answer                                                                                                                                                           |                                                                                                                                                                                                                                                                                                  |                                                                                                                                                                                              |   |     |   |    |    |              |    |                   |
| 346 | [id10099_m]<br>Show the field ONLY if:<br>[id10098_m] = '0' or [id10098_m] = '99' or [id10098_m] = '88'                                                                     | Was the injury self-inflicted?                                                                                                                                                                                                                                                                   | radio<br><table border="1"> <tr><td>1</td><td>Yes</td></tr> <tr><td>0</td><td>No</td></tr> <tr><td>99</td><td>Doesn't know</td></tr> <tr><td>88</td><td>Refused to answer</td></tr> </table> | 1 | Yes | 0 | No | 99 | Doesn't know | 88 | Refused to answer |
| 1   | Yes                                                                                                                                                                         |                                                                                                                                                                                                                                                                                                  |                                                                                                                                                                                              |   |     |   |    |    |              |    |                   |
| 0   | No                                                                                                                                                                          |                                                                                                                                                                                                                                                                                                  |                                                                                                                                                                                              |   |     |   |    |    |              |    |                   |
| 99  | Doesn't know                                                                                                                                                                |                                                                                                                                                                                                                                                                                                  |                                                                                                                                                                                              |   |     |   |    |    |              |    |                   |
| 88  | Refused to answer                                                                                                                                                           |                                                                                                                                                                                                                                                                                                  |                                                                                                                                                                                              |   |     |   |    |    |              |    |                   |
| 347 | [id10100_m]<br>Show the field ONLY if:<br>([id10098_m] = '0' or [id10098_m] = '99' or [id10098_m] = '88') and [id10099_m] = '0' or [id10099_m] = '99' or [id10099_m] = '88' | Was the injury intentionally inflicted by someone else?                                                                                                                                                                                                                                          | radio<br><table border="1"> <tr><td>1</td><td>Yes</td></tr> <tr><td>0</td><td>No</td></tr> <tr><td>99</td><td>Doesn't know</td></tr> <tr><td>88</td><td>Refused to answer</td></tr> </table> | 1 | Yes | 0 | No | 99 | Doesn't know | 88 | Refused to answer |
| 1   | Yes                                                                                                                                                                         |                                                                                                                                                                                                                                                                                                  |                                                                                                                                                                                              |   |     |   |    |    |              |    |                   |
| 0   | No                                                                                                                                                                          |                                                                                                                                                                                                                                                                                                  |                                                                                                                                                                                              |   |     |   |    |    |              |    |                   |
| 99  | Doesn't know                                                                                                                                                                |                                                                                                                                                                                                                                                                                                  |                                                                                                                                                                                              |   |     |   |    |    |              |    |                   |
| 88  | Refused to answer                                                                                                                                                           |                                                                                                                                                                                                                                                                                                  |                                                                                                                                                                                              |   |     |   |    |    |              |    |                   |
| 348 | [id10120_m]                                                                                                                                                                 | Section Header: <i>Duration of Illness</i><br>For how long was she ill before death? (in days)                                                                                                                                                                                                   | text (integer, Min: 0, Max: 300)                                                                                                                                                             |   |     |   |    |    |              |    |                   |
| 349 | [id10123_m]                                                                                                                                                                 | Did she die suddenly?<br><i>Suddenly means died unexpectedly within 24 hours of being in regular health.</i>                                                                                                                                                                                     | radio<br><table border="1"> <tr><td>1</td><td>Yes</td></tr> <tr><td>0</td><td>No</td></tr> <tr><td>99</td><td>Doesn't know</td></tr> <tr><td>88</td><td>Refused to answer</td></tr> </table> | 1 | Yes | 0 | No | 99 | Doesn't know | 88 | Refused to answer |
| 1   | Yes                                                                                                                                                                         |                                                                                                                                                                                                                                                                                                  |                                                                                                                                                                                              |   |     |   |    |    |              |    |                   |
| 0   | No                                                                                                                                                                          |                                                                                                                                                                                                                                                                                                  |                                                                                                                                                                                              |   |     |   |    |    |              |    |                   |
| 99  | Doesn't know                                                                                                                                                                |                                                                                                                                                                                                                                                                                                  |                                                                                                                                                                                              |   |     |   |    |    |              |    |                   |
| 88  | Refused to answer                                                                                                                                                           |                                                                                                                                                                                                                                                                                                  |                                                                                                                                                                                              |   |     |   |    |    |              |    |                   |
| 350 | [id10125_m]                                                                                                                                                                 | Section Header: <i>Medical History Associated With Final Illness Remind the respondent that we are asking for the diagnosis assessed by a doctor, health worker, or other health professional during the final illness.</i><br>Was there any diagnosis by a health professional of tuberculosis? | radio<br><table border="1"> <tr><td>1</td><td>Yes</td></tr> <tr><td>0</td><td>No</td></tr> <tr><td>99</td><td>Doesn't know</td></tr> <tr><td>88</td><td>Refused to answer</td></tr> </table> | 1 | Yes | 0 | No | 99 | Doesn't know | 88 | Refused to answer |
| 1   | Yes                                                                                                                                                                         |                                                                                                                                                                                                                                                                                                  |                                                                                                                                                                                              |   |     |   |    |    |              |    |                   |
| 0   | No                                                                                                                                                                          |                                                                                                                                                                                                                                                                                                  |                                                                                                                                                                                              |   |     |   |    |    |              |    |                   |
| 99  | Doesn't know                                                                                                                                                                |                                                                                                                                                                                                                                                                                                  |                                                                                                                                                                                              |   |     |   |    |    |              |    |                   |
| 88  | Refused to answer                                                                                                                                                           |                                                                                                                                                                                                                                                                                                  |                                                                                                                                                                                              |   |     |   |    |    |              |    |                   |
| 351 | [id10126_m]                                                                                                                                                                 | Was an HIV test ever positive?                                                                                                                                                                                                                                                                   | radio<br><table border="1"> <tr><td>1</td><td>Yes</td></tr> <tr><td>0</td><td>No</td></tr> <tr><td>99</td><td>Doesn't know</td></tr> <tr><td>88</td><td>Refused to answer</td></tr> </table> | 1 | Yes | 0 | No | 99 | Doesn't know | 88 | Refused to answer |
| 1   | Yes                                                                                                                                                                         |                                                                                                                                                                                                                                                                                                  |                                                                                                                                                                                              |   |     |   |    |    |              |    |                   |
| 0   | No                                                                                                                                                                          |                                                                                                                                                                                                                                                                                                  |                                                                                                                                                                                              |   |     |   |    |    |              |    |                   |
| 99  | Doesn't know                                                                                                                                                                |                                                                                                                                                                                                                                                                                                  |                                                                                                                                                                                              |   |     |   |    |    |              |    |                   |
| 88  | Refused to answer                                                                                                                                                           |                                                                                                                                                                                                                                                                                                  |                                                                                                                                                                                              |   |     |   |    |    |              |    |                   |
| 352 | [id10127_m]                                                                                                                                                                 | Was there any diagnosis by a health professional of AIDS?                                                                                                                                                                                                                                        | radio<br><table border="1"> <tr><td>1</td><td>Yes</td></tr> <tr><td>0</td><td>No</td></tr> <tr><td>99</td><td>Doesn't know</td></tr> <tr><td>88</td><td>Refused to answer</td></tr> </table> | 1 | Yes | 0 | No | 99 | Doesn't know | 88 | Refused to answer |
| 1   | Yes                                                                                                                                                                         |                                                                                                                                                                                                                                                                                                  |                                                                                                                                                                                              |   |     |   |    |    |              |    |                   |
| 0   | No                                                                                                                                                                          |                                                                                                                                                                                                                                                                                                  |                                                                                                                                                                                              |   |     |   |    |    |              |    |                   |
| 99  | Doesn't know                                                                                                                                                                |                                                                                                                                                                                                                                                                                                  |                                                                                                                                                                                              |   |     |   |    |    |              |    |                   |
| 88  | Refused to answer                                                                                                                                                           |                                                                                                                                                                                                                                                                                                  |                                                                                                                                                                                              |   |     |   |    |    |              |    |                   |
| 353 | [id10128_m]                                                                                                                                                                 | Did she have a recent positive test by a health professional for malaria?                                                                                                                                                                                                                        | radio<br><table border="1"> <tr><td>1</td><td>Yes</td></tr> <tr><td>0</td><td>No</td></tr> <tr><td>99</td><td>Doesn't know</td></tr> <tr><td>88</td><td>Refused to answer</td></tr> </table> | 1 | Yes | 0 | No | 99 | Doesn't know | 88 | Refused to answer |
| 1   | Yes                                                                                                                                                                         |                                                                                                                                                                                                                                                                                                  |                                                                                                                                                                                              |   |     |   |    |    |              |    |                   |
| 0   | No                                                                                                                                                                          |                                                                                                                                                                                                                                                                                                  |                                                                                                                                                                                              |   |     |   |    |    |              |    |                   |
| 99  | Doesn't know                                                                                                                                                                |                                                                                                                                                                                                                                                                                                  |                                                                                                                                                                                              |   |     |   |    |    |              |    |                   |
| 88  | Refused to answer                                                                                                                                                           |                                                                                                                                                                                                                                                                                                  |                                                                                                                                                                                              |   |     |   |    |    |              |    |                   |
| 354 | [id10129_m]                                                                                                                                                                 | Did she have a recent negative test by a health professional for malaria?                                                                                                                                                                                                                        | radio<br><table border="1"> <tr><td>1</td><td>Yes</td></tr> <tr><td>0</td><td>No</td></tr> <tr><td>99</td><td>Doesn't know</td></tr> <tr><td>88</td><td>Refused to answer</td></tr> </table> | 1 | Yes | 0 | No | 99 | Doesn't know | 88 | Refused to answer |
| 1   | Yes                                                                                                                                                                         |                                                                                                                                                                                                                                                                                                  |                                                                                                                                                                                              |   |     |   |    |    |              |    |                   |
| 0   | No                                                                                                                                                                          |                                                                                                                                                                                                                                                                                                  |                                                                                                                                                                                              |   |     |   |    |    |              |    |                   |
| 99  | Doesn't know                                                                                                                                                                |                                                                                                                                                                                                                                                                                                  |                                                                                                                                                                                              |   |     |   |    |    |              |    |                   |
| 88  | Refused to answer                                                                                                                                                           |                                                                                                                                                                                                                                                                                                  |                                                                                                                                                                                              |   |     |   |    |    |              |    |                   |

|     |                   |                                                                                                   |                                                                                                                                                                                              |   |     |   |    |    |              |    |                   |
|-----|-------------------|---------------------------------------------------------------------------------------------------|----------------------------------------------------------------------------------------------------------------------------------------------------------------------------------------------|---|-----|---|----|----|--------------|----|-------------------|
| 355 | [id10130_m]       | Was there any diagnosis by a health professional of dengue fever?                                 | radio<br><table border="1"> <tr><td>1</td><td>Yes</td></tr> <tr><td>0</td><td>No</td></tr> <tr><td>99</td><td>Doesn't know</td></tr> <tr><td>88</td><td>Refused to answer</td></tr> </table> | 1 | Yes | 0 | No | 99 | Doesn't know | 88 | Refused to answer |
| 1   | Yes               |                                                                                                   |                                                                                                                                                                                              |   |     |   |    |    |              |    |                   |
| 0   | No                |                                                                                                   |                                                                                                                                                                                              |   |     |   |    |    |              |    |                   |
| 99  | Doesn't know      |                                                                                                   |                                                                                                                                                                                              |   |     |   |    |    |              |    |                   |
| 88  | Refused to answer |                                                                                                   |                                                                                                                                                                                              |   |     |   |    |    |              |    |                   |
| 356 | [id10131_m]       | Was there any diagnosis by a health professional of measles?                                      | radio<br><table border="1"> <tr><td>1</td><td>Yes</td></tr> <tr><td>0</td><td>No</td></tr> <tr><td>99</td><td>Doesn't know</td></tr> <tr><td>88</td><td>Refused to answer</td></tr> </table> | 1 | Yes | 0 | No | 99 | Doesn't know | 88 | Refused to answer |
| 1   | Yes               |                                                                                                   |                                                                                                                                                                                              |   |     |   |    |    |              |    |                   |
| 0   | No                |                                                                                                   |                                                                                                                                                                                              |   |     |   |    |    |              |    |                   |
| 99  | Doesn't know      |                                                                                                   |                                                                                                                                                                                              |   |     |   |    |    |              |    |                   |
| 88  | Refused to answer |                                                                                                   |                                                                                                                                                                                              |   |     |   |    |    |              |    |                   |
| 357 | [id10132_m]       | Was there any diagnosis by a health professional of high blood pressure?                          | radio<br><table border="1"> <tr><td>1</td><td>Yes</td></tr> <tr><td>0</td><td>No</td></tr> <tr><td>99</td><td>Doesn't know</td></tr> <tr><td>88</td><td>Refused to answer</td></tr> </table> | 1 | Yes | 0 | No | 99 | Doesn't know | 88 | Refused to answer |
| 1   | Yes               |                                                                                                   |                                                                                                                                                                                              |   |     |   |    |    |              |    |                   |
| 0   | No                |                                                                                                   |                                                                                                                                                                                              |   |     |   |    |    |              |    |                   |
| 99  | Doesn't know      |                                                                                                   |                                                                                                                                                                                              |   |     |   |    |    |              |    |                   |
| 88  | Refused to answer |                                                                                                   |                                                                                                                                                                                              |   |     |   |    |    |              |    |                   |
| 358 | [id10133_m]       | Was there any diagnosis by a health professional of heart disease?                                | radio<br><table border="1"> <tr><td>1</td><td>Yes</td></tr> <tr><td>0</td><td>No</td></tr> <tr><td>99</td><td>Doesn't know</td></tr> <tr><td>88</td><td>Refused to answer</td></tr> </table> | 1 | Yes | 0 | No | 99 | Doesn't know | 88 | Refused to answer |
| 1   | Yes               |                                                                                                   |                                                                                                                                                                                              |   |     |   |    |    |              |    |                   |
| 0   | No                |                                                                                                   |                                                                                                                                                                                              |   |     |   |    |    |              |    |                   |
| 99  | Doesn't know      |                                                                                                   |                                                                                                                                                                                              |   |     |   |    |    |              |    |                   |
| 88  | Refused to answer |                                                                                                   |                                                                                                                                                                                              |   |     |   |    |    |              |    |                   |
| 359 | [id10134_m]       | Was there any diagnosis by a health professional of diabetes?                                     | radio<br><table border="1"> <tr><td>1</td><td>Yes</td></tr> <tr><td>0</td><td>No</td></tr> <tr><td>99</td><td>Doesn't know</td></tr> <tr><td>88</td><td>Refused to answer</td></tr> </table> | 1 | Yes | 0 | No | 99 | Doesn't know | 88 | Refused to answer |
| 1   | Yes               |                                                                                                   |                                                                                                                                                                                              |   |     |   |    |    |              |    |                   |
| 0   | No                |                                                                                                   |                                                                                                                                                                                              |   |     |   |    |    |              |    |                   |
| 99  | Doesn't know      |                                                                                                   |                                                                                                                                                                                              |   |     |   |    |    |              |    |                   |
| 88  | Refused to answer |                                                                                                   |                                                                                                                                                                                              |   |     |   |    |    |              |    |                   |
| 360 | [id10135_m]       | Was there any diagnosis by a health professional of asthma?                                       | radio<br><table border="1"> <tr><td>1</td><td>Yes</td></tr> <tr><td>0</td><td>No</td></tr> <tr><td>99</td><td>Doesn't know</td></tr> <tr><td>88</td><td>Refused to answer</td></tr> </table> | 1 | Yes | 0 | No | 99 | Doesn't know | 88 | Refused to answer |
| 1   | Yes               |                                                                                                   |                                                                                                                                                                                              |   |     |   |    |    |              |    |                   |
| 0   | No                |                                                                                                   |                                                                                                                                                                                              |   |     |   |    |    |              |    |                   |
| 99  | Doesn't know      |                                                                                                   |                                                                                                                                                                                              |   |     |   |    |    |              |    |                   |
| 88  | Refused to answer |                                                                                                   |                                                                                                                                                                                              |   |     |   |    |    |              |    |                   |
| 361 | [id10136_m]       | Was there any diagnosis by a health professional of epilepsy?                                     | radio<br><table border="1"> <tr><td>1</td><td>Yes</td></tr> <tr><td>0</td><td>No</td></tr> <tr><td>99</td><td>Doesn't know</td></tr> <tr><td>88</td><td>Refused to answer</td></tr> </table> | 1 | Yes | 0 | No | 99 | Doesn't know | 88 | Refused to answer |
| 1   | Yes               |                                                                                                   |                                                                                                                                                                                              |   |     |   |    |    |              |    |                   |
| 0   | No                |                                                                                                   |                                                                                                                                                                                              |   |     |   |    |    |              |    |                   |
| 99  | Doesn't know      |                                                                                                   |                                                                                                                                                                                              |   |     |   |    |    |              |    |                   |
| 88  | Refused to answer |                                                                                                   |                                                                                                                                                                                              |   |     |   |    |    |              |    |                   |
| 362 | [id10137_m]       | Was there any diagnosis by a health professional of cancer?                                       | radio<br><table border="1"> <tr><td>1</td><td>Yes</td></tr> <tr><td>0</td><td>No</td></tr> <tr><td>99</td><td>Doesn't know</td></tr> <tr><td>88</td><td>Refused to answer</td></tr> </table> | 1 | Yes | 0 | No | 99 | Doesn't know | 88 | Refused to answer |
| 1   | Yes               |                                                                                                   |                                                                                                                                                                                              |   |     |   |    |    |              |    |                   |
| 0   | No                |                                                                                                   |                                                                                                                                                                                              |   |     |   |    |    |              |    |                   |
| 99  | Doesn't know      |                                                                                                   |                                                                                                                                                                                              |   |     |   |    |    |              |    |                   |
| 88  | Refused to answer |                                                                                                   |                                                                                                                                                                                              |   |     |   |    |    |              |    |                   |
| 363 | [id10138_m]       | Was there any diagnosis by a health professional of Chronic Obstructive Pulmonary Disease (COPD)? | radio<br><table border="1"> <tr><td>1</td><td>Yes</td></tr> <tr><td>0</td><td>No</td></tr> <tr><td>99</td><td>Doesn't know</td></tr> <tr><td>88</td><td>Refused to answer</td></tr> </table> | 1 | Yes | 0 | No | 99 | Doesn't know | 88 | Refused to answer |
| 1   | Yes               |                                                                                                   |                                                                                                                                                                                              |   |     |   |    |    |              |    |                   |
| 0   | No                |                                                                                                   |                                                                                                                                                                                              |   |     |   |    |    |              |    |                   |
| 99  | Doesn't know      |                                                                                                   |                                                                                                                                                                                              |   |     |   |    |    |              |    |                   |
| 88  | Refused to answer |                                                                                                   |                                                                                                                                                                                              |   |     |   |    |    |              |    |                   |

|     |                                                           |                                                                          |                                                                                                                                                                                                                                           |   |          |   |          |    |              |    |                   |    |                   |
|-----|-----------------------------------------------------------|--------------------------------------------------------------------------|-------------------------------------------------------------------------------------------------------------------------------------------------------------------------------------------------------------------------------------------|---|----------|---|----------|----|--------------|----|-------------------|----|-------------------|
| 364 | [id10139_m]                                               | Was there any diagnosis by a health professional of dementia?            | radio<br><table border="1"> <tr><td>1</td><td>Yes</td></tr> <tr><td>0</td><td>No</td></tr> <tr><td>99</td><td>Doesn't know</td></tr> <tr><td>88</td><td>Refused to answer</td></tr> </table>                                              | 1 | Yes      | 0 | No       | 99 | Doesn't know | 88 | Refused to answer |    |                   |
| 1   | Yes                                                       |                                                                          |                                                                                                                                                                                                                                           |   |          |   |          |    |              |    |                   |    |                   |
| 0   | No                                                        |                                                                          |                                                                                                                                                                                                                                           |   |          |   |          |    |              |    |                   |    |                   |
| 99  | Doesn't know                                              |                                                                          |                                                                                                                                                                                                                                           |   |          |   |          |    |              |    |                   |    |                   |
| 88  | Refused to answer                                         |                                                                          |                                                                                                                                                                                                                                           |   |          |   |          |    |              |    |                   |    |                   |
| 365 | [id10140_m]                                               | Was there any diagnosis by a health professional of depression?          | radio<br><table border="1"> <tr><td>1</td><td>Yes</td></tr> <tr><td>0</td><td>No</td></tr> <tr><td>99</td><td>Doesn't know</td></tr> <tr><td>88</td><td>Refused to answer</td></tr> </table>                                              | 1 | Yes      | 0 | No       | 99 | Doesn't know | 88 | Refused to answer |    |                   |
| 1   | Yes                                                       |                                                                          |                                                                                                                                                                                                                                           |   |          |   |          |    |              |    |                   |    |                   |
| 0   | No                                                        |                                                                          |                                                                                                                                                                                                                                           |   |          |   |          |    |              |    |                   |    |                   |
| 99  | Doesn't know                                              |                                                                          |                                                                                                                                                                                                                                           |   |          |   |          |    |              |    |                   |    |                   |
| 88  | Refused to answer                                         |                                                                          |                                                                                                                                                                                                                                           |   |          |   |          |    |              |    |                   |    |                   |
| 366 | [id10141_m]                                               | Was there any diagnosis by a health professional of stroke?              | radio<br><table border="1"> <tr><td>1</td><td>Yes</td></tr> <tr><td>0</td><td>No</td></tr> <tr><td>99</td><td>Doesn't know</td></tr> <tr><td>88</td><td>Refused to answer</td></tr> </table>                                              | 1 | Yes      | 0 | No       | 99 | Doesn't know | 88 | Refused to answer |    |                   |
| 1   | Yes                                                       |                                                                          |                                                                                                                                                                                                                                           |   |          |   |          |    |              |    |                   |    |                   |
| 0   | No                                                        |                                                                          |                                                                                                                                                                                                                                           |   |          |   |          |    |              |    |                   |    |                   |
| 99  | Doesn't know                                              |                                                                          |                                                                                                                                                                                                                                           |   |          |   |          |    |              |    |                   |    |                   |
| 88  | Refused to answer                                         |                                                                          |                                                                                                                                                                                                                                           |   |          |   |          |    |              |    |                   |    |                   |
| 367 | [id10142_m]                                               | Was there any diagnosis by a health professional of sickle cell disease? | radio<br><table border="1"> <tr><td>1</td><td>Yes</td></tr> <tr><td>0</td><td>No</td></tr> <tr><td>99</td><td>Doesn't know</td></tr> <tr><td>88</td><td>Refused to answer</td></tr> </table>                                              | 1 | Yes      | 0 | No       | 99 | Doesn't know | 88 | Refused to answer |    |                   |
| 1   | Yes                                                       |                                                                          |                                                                                                                                                                                                                                           |   |          |   |          |    |              |    |                   |    |                   |
| 0   | No                                                        |                                                                          |                                                                                                                                                                                                                                           |   |          |   |          |    |              |    |                   |    |                   |
| 99  | Doesn't know                                              |                                                                          |                                                                                                                                                                                                                                           |   |          |   |          |    |              |    |                   |    |                   |
| 88  | Refused to answer                                         |                                                                          |                                                                                                                                                                                                                                           |   |          |   |          |    |              |    |                   |    |                   |
| 368 | [id10143_m]                                               | Was there any diagnosis by a health professional of kidney disease?      | radio<br><table border="1"> <tr><td>1</td><td>Yes</td></tr> <tr><td>0</td><td>No</td></tr> <tr><td>99</td><td>Doesn't know</td></tr> <tr><td>88</td><td>Refused to answer</td></tr> </table>                                              | 1 | Yes      | 0 | No       | 99 | Doesn't know | 88 | Refused to answer |    |                   |
| 1   | Yes                                                       |                                                                          |                                                                                                                                                                                                                                           |   |          |   |          |    |              |    |                   |    |                   |
| 0   | No                                                        |                                                                          |                                                                                                                                                                                                                                           |   |          |   |          |    |              |    |                   |    |                   |
| 99  | Doesn't know                                              |                                                                          |                                                                                                                                                                                                                                           |   |          |   |          |    |              |    |                   |    |                   |
| 88  | Refused to answer                                         |                                                                          |                                                                                                                                                                                                                                           |   |          |   |          |    |              |    |                   |    |                   |
| 369 | [id10144_m]                                               | Was there any diagnosis by a health professional of liver disease?       | radio<br><table border="1"> <tr><td>1</td><td>Yes</td></tr> <tr><td>0</td><td>No</td></tr> <tr><td>99</td><td>Doesn't know</td></tr> <tr><td>88</td><td>Refused to answer</td></tr> </table>                                              | 1 | Yes      | 0 | No       | 99 | Doesn't know | 88 | Refused to answer |    |                   |
| 1   | Yes                                                       |                                                                          |                                                                                                                                                                                                                                           |   |          |   |          |    |              |    |                   |    |                   |
| 0   | No                                                        |                                                                          |                                                                                                                                                                                                                                           |   |          |   |          |    |              |    |                   |    |                   |
| 99  | Doesn't know                                              |                                                                          |                                                                                                                                                                                                                                           |   |          |   |          |    |              |    |                   |    |                   |
| 88  | Refused to answer                                         |                                                                          |                                                                                                                                                                                                                                           |   |          |   |          |    |              |    |                   |    |                   |
| 370 | [id10482_m]                                               | Was there any diagnosis by a health professional of COVID-19?            | radio<br><table border="1"> <tr><td>1</td><td>Yes</td></tr> <tr><td>0</td><td>No</td></tr> <tr><td>99</td><td>Doesn't know</td></tr> <tr><td>88</td><td>Refused to answer</td></tr> </table>                                              | 1 | Yes      | 0 | No       | 99 | Doesn't know | 88 | Refused to answer |    |                   |
| 1   | Yes                                                       |                                                                          |                                                                                                                                                                                                                                           |   |          |   |          |    |              |    |                   |    |                   |
| 0   | No                                                        |                                                                          |                                                                                                                                                                                                                                           |   |          |   |          |    |              |    |                   |    |                   |
| 99  | Doesn't know                                              |                                                                          |                                                                                                                                                                                                                                           |   |          |   |          |    |              |    |                   |    |                   |
| 88  | Refused to answer                                         |                                                                          |                                                                                                                                                                                                                                           |   |          |   |          |    |              |    |                   |    |                   |
| 371 | [id10483_m]                                               | Did she have a recent test by a health professional for COVID-19?        | radio<br><table border="1"> <tr><td>1</td><td>Yes</td></tr> <tr><td>0</td><td>No</td></tr> <tr><td>99</td><td>Doesn't know</td></tr> <tr><td>88</td><td>Refused to answer</td></tr> </table>                                              | 1 | Yes      | 0 | No       | 99 | Doesn't know | 88 | Refused to answer |    |                   |
| 1   | Yes                                                       |                                                                          |                                                                                                                                                                                                                                           |   |          |   |          |    |              |    |                   |    |                   |
| 0   | No                                                        |                                                                          |                                                                                                                                                                                                                                           |   |          |   |          |    |              |    |                   |    |                   |
| 99  | Doesn't know                                              |                                                                          |                                                                                                                                                                                                                                           |   |          |   |          |    |              |    |                   |    |                   |
| 88  | Refused to answer                                         |                                                                          |                                                                                                                                                                                                                                           |   |          |   |          |    |              |    |                   |    |                   |
| 372 | [id10484_m]<br>Show the field ONLY if:<br>[id10483_m]='1' | What was the result?                                                     | radio<br><table border="1"> <tr><td>1</td><td>Positive</td></tr> <tr><td>2</td><td>Negative</td></tr> <tr><td>3</td><td>Unclear</td></tr> <tr><td>99</td><td>Don't know</td></tr> <tr><td>88</td><td>Refused to answer</td></tr> </table> | 1 | Positive | 2 | Negative | 3  | Unclear      | 99 | Don't know        | 88 | Refused to answer |
| 1   | Positive                                                  |                                                                          |                                                                                                                                                                                                                                           |   |          |   |          |    |              |    |                   |    |                   |
| 2   | Negative                                                  |                                                                          |                                                                                                                                                                                                                                           |   |          |   |          |    |              |    |                   |    |                   |
| 3   | Unclear                                                   |                                                                          |                                                                                                                                                                                                                                           |   |          |   |          |    |              |    |                   |    |                   |
| 99  | Don't know                                                |                                                                          |                                                                                                                                                                                                                                           |   |          |   |          |    |              |    |                   |    |                   |
| 88  | Refused to answer                                         |                                                                          |                                                                                                                                                                                                                                           |   |          |   |          |    |              |    |                   |    |                   |

|     |                                                           |                                                                                                          |                                                                                                                                                                                                                                                       |   |            |   |            |    |               |    |                   |    |                   |
|-----|-----------------------------------------------------------|----------------------------------------------------------------------------------------------------------|-------------------------------------------------------------------------------------------------------------------------------------------------------------------------------------------------------------------------------------------------------|---|------------|---|------------|----|---------------|----|-------------------|----|-------------------|
| 373 | [id10147_m]                                               | Section Header: <i>General Signs and Symptoms Associated with Final Illness</i><br>Did she have a fever? | radio<br><table border="1"> <tr><td>1</td><td>Yes</td></tr> <tr><td>0</td><td>No</td></tr> <tr><td>99</td><td>Doesn't know</td></tr> <tr><td>88</td><td>Refused to answer</td></tr> </table>                                                          | 1 | Yes        | 0 | No         | 99 | Doesn't know  | 88 | Refused to answer |    |                   |
| 1   | Yes                                                       |                                                                                                          |                                                                                                                                                                                                                                                       |   |            |   |            |    |               |    |                   |    |                   |
| 0   | No                                                        |                                                                                                          |                                                                                                                                                                                                                                                       |   |            |   |            |    |               |    |                   |    |                   |
| 99  | Doesn't know                                              |                                                                                                          |                                                                                                                                                                                                                                                       |   |            |   |            |    |               |    |                   |    |                   |
| 88  | Refused to answer                                         |                                                                                                          |                                                                                                                                                                                                                                                       |   |            |   |            |    |               |    |                   |    |                   |
| 374 | [id10148_m]<br>Show the field ONLY if:<br>[id10147_m]='1' | How long did the fever last? (in days)                                                                   | text (number)                                                                                                                                                                                                                                         |   |            |   |            |    |               |    |                   |    |                   |
| 375 | [id10149_m]<br>Show the field ONLY if:<br>[id10147_m]='1' | Did the fever continue until death?                                                                      | radio<br><table border="1"> <tr><td>1</td><td>Yes</td></tr> <tr><td>0</td><td>No</td></tr> <tr><td>99</td><td>Doesn't know</td></tr> <tr><td>88</td><td>Refused to answer</td></tr> </table>                                                          | 1 | Yes        | 0 | No         | 99 | Doesn't know  | 88 | Refused to answer |    |                   |
| 1   | Yes                                                       |                                                                                                          |                                                                                                                                                                                                                                                       |   |            |   |            |    |               |    |                   |    |                   |
| 0   | No                                                        |                                                                                                          |                                                                                                                                                                                                                                                       |   |            |   |            |    |               |    |                   |    |                   |
| 99  | Doesn't know                                              |                                                                                                          |                                                                                                                                                                                                                                                       |   |            |   |            |    |               |    |                   |    |                   |
| 88  | Refused to answer                                         |                                                                                                          |                                                                                                                                                                                                                                                       |   |            |   |            |    |               |    |                   |    |                   |
| 376 | [id10150_m]<br>Show the field ONLY if:<br>[id10147_m]='1' | How severe was the fever?                                                                                | radio<br><table border="1"> <tr><td>1</td><td>Mild</td></tr> <tr><td>2</td><td>Moderate</td></tr> <tr><td>3</td><td>Severe</td></tr> <tr><td>99</td><td>Doesn't know</td></tr> <tr><td>88</td><td>Refused to answer</td></tr> </table>                | 1 | Mild       | 2 | Moderate   | 3  | Severe        | 99 | Doesn't know      | 88 | Refused to answer |
| 1   | Mild                                                      |                                                                                                          |                                                                                                                                                                                                                                                       |   |            |   |            |    |               |    |                   |    |                   |
| 2   | Moderate                                                  |                                                                                                          |                                                                                                                                                                                                                                                       |   |            |   |            |    |               |    |                   |    |                   |
| 3   | Severe                                                    |                                                                                                          |                                                                                                                                                                                                                                                       |   |            |   |            |    |               |    |                   |    |                   |
| 99  | Doesn't know                                              |                                                                                                          |                                                                                                                                                                                                                                                       |   |            |   |            |    |               |    |                   |    |                   |
| 88  | Refused to answer                                         |                                                                                                          |                                                                                                                                                                                                                                                       |   |            |   |            |    |               |    |                   |    |                   |
| 377 | [id10151_m]<br>Show the field ONLY if:<br>[id10147_m]='1' | What was the pattern of the fever?                                                                       | radio<br><table border="1"> <tr><td>1</td><td>Continuous</td></tr> <tr><td>2</td><td>On and off</td></tr> <tr><td>3</td><td>Only at night</td></tr> <tr><td>99</td><td>Doesn't know</td></tr> <tr><td>88</td><td>Refused to answer</td></tr> </table> | 1 | Continuous | 2 | On and off | 3  | Only at night | 99 | Doesn't know      | 88 | Refused to answer |
| 1   | Continuous                                                |                                                                                                          |                                                                                                                                                                                                                                                       |   |            |   |            |    |               |    |                   |    |                   |
| 2   | On and off                                                |                                                                                                          |                                                                                                                                                                                                                                                       |   |            |   |            |    |               |    |                   |    |                   |
| 3   | Only at night                                             |                                                                                                          |                                                                                                                                                                                                                                                       |   |            |   |            |    |               |    |                   |    |                   |
| 99  | Doesn't know                                              |                                                                                                          |                                                                                                                                                                                                                                                       |   |            |   |            |    |               |    |                   |    |                   |
| 88  | Refused to answer                                         |                                                                                                          |                                                                                                                                                                                                                                                       |   |            |   |            |    |               |    |                   |    |                   |
| 378 | [id10152_m]                                               | Did she have night sweats?                                                                               | radio<br><table border="1"> <tr><td>1</td><td>Yes</td></tr> <tr><td>0</td><td>No</td></tr> <tr><td>99</td><td>Doesn't know</td></tr> <tr><td>88</td><td>Refused to answer</td></tr> </table>                                                          | 1 | Yes        | 0 | No         | 99 | Doesn't know  | 88 | Refused to answer |    |                   |
| 1   | Yes                                                       |                                                                                                          |                                                                                                                                                                                                                                                       |   |            |   |            |    |               |    |                   |    |                   |
| 0   | No                                                        |                                                                                                          |                                                                                                                                                                                                                                                       |   |            |   |            |    |               |    |                   |    |                   |
| 99  | Doesn't know                                              |                                                                                                          |                                                                                                                                                                                                                                                       |   |            |   |            |    |               |    |                   |    |                   |
| 88  | Refused to answer                                         |                                                                                                          |                                                                                                                                                                                                                                                       |   |            |   |            |    |               |    |                   |    |                   |
| 379 | [id10153_m]                                               | Did she have a cough?                                                                                    | radio<br><table border="1"> <tr><td>1</td><td>Yes</td></tr> <tr><td>0</td><td>No</td></tr> <tr><td>99</td><td>Doesn't know</td></tr> <tr><td>88</td><td>Refused to answer</td></tr> </table>                                                          | 1 | Yes        | 0 | No         | 99 | Doesn't know  | 88 | Refused to answer |    |                   |
| 1   | Yes                                                       |                                                                                                          |                                                                                                                                                                                                                                                       |   |            |   |            |    |               |    |                   |    |                   |
| 0   | No                                                        |                                                                                                          |                                                                                                                                                                                                                                                       |   |            |   |            |    |               |    |                   |    |                   |
| 99  | Doesn't know                                              |                                                                                                          |                                                                                                                                                                                                                                                       |   |            |   |            |    |               |    |                   |    |                   |
| 88  | Refused to answer                                         |                                                                                                          |                                                                                                                                                                                                                                                       |   |            |   |            |    |               |    |                   |    |                   |
| 380 | [id10154_m]<br>Show the field ONLY if:<br>[id10153_m]='1' | For how long did she have a cough?                                                                       | text (number)                                                                                                                                                                                                                                         |   |            |   |            |    |               |    |                   |    |                   |
| 381 | [id10155_m]<br>Show the field ONLY if:<br>[id10153_m]='1' | Was the cough productive, with sputum?                                                                   | radio<br><table border="1"> <tr><td>1</td><td>Yes</td></tr> <tr><td>0</td><td>No</td></tr> <tr><td>99</td><td>Doesn't know</td></tr> <tr><td>88</td><td>Refused to answer</td></tr> </table>                                                          | 1 | Yes        | 0 | No         | 99 | Doesn't know  | 88 | Refused to answer |    |                   |
| 1   | Yes                                                       |                                                                                                          |                                                                                                                                                                                                                                                       |   |            |   |            |    |               |    |                   |    |                   |
| 0   | No                                                        |                                                                                                          |                                                                                                                                                                                                                                                       |   |            |   |            |    |               |    |                   |    |                   |
| 99  | Doesn't know                                              |                                                                                                          |                                                                                                                                                                                                                                                       |   |            |   |            |    |               |    |                   |    |                   |
| 88  | Refused to answer                                         |                                                                                                          |                                                                                                                                                                                                                                                       |   |            |   |            |    |               |    |                   |    |                   |
| 382 | [id10156_m]<br>Show the field ONLY if:<br>[id10153_m]='1' | Was the cough very severe?                                                                               | radio<br><table border="1"> <tr><td>1</td><td>Yes</td></tr> <tr><td>0</td><td>No</td></tr> <tr><td>99</td><td>Doesn't know</td></tr> <tr><td>88</td><td>Refused to answer</td></tr> </table>                                                          | 1 | Yes        | 0 | No         | 99 | Doesn't know  | 88 | Refused to answer |    |                   |
| 1   | Yes                                                       |                                                                                                          |                                                                                                                                                                                                                                                       |   |            |   |            |    |               |    |                   |    |                   |
| 0   | No                                                        |                                                                                                          |                                                                                                                                                                                                                                                       |   |            |   |            |    |               |    |                   |    |                   |
| 99  | Doesn't know                                              |                                                                                                          |                                                                                                                                                                                                                                                       |   |            |   |            |    |               |    |                   |    |                   |
| 88  | Refused to answer                                         |                                                                                                          |                                                                                                                                                                                                                                                       |   |            |   |            |    |               |    |                   |    |                   |



|     |                                                           |                                                                    |                                                                                                                                                                                                             |   |            |   |            |    |              |    |                   |
|-----|-----------------------------------------------------------|--------------------------------------------------------------------|-------------------------------------------------------------------------------------------------------------------------------------------------------------------------------------------------------------|---|------------|---|------------|----|--------------|----|-------------------|
| 383 | [id10157_m]<br>Show the field ONLY if:<br>[id10153_m]='1' | Did she cough up blood?                                            | radio<br><table border="1"> <tr><td>1</td><td>Yes</td></tr> <tr><td>0</td><td>No</td></tr> <tr><td>99</td><td>Doesn't know</td></tr> <tr><td>88</td><td>Refused to answer</td></tr> </table>                | 1 | Yes        | 0 | No         | 99 | Doesn't know | 88 | Refused to answer |
| 1   | Yes                                                       |                                                                    |                                                                                                                                                                                                             |   |            |   |            |    |              |    |                   |
| 0   | No                                                        |                                                                    |                                                                                                                                                                                                             |   |            |   |            |    |              |    |                   |
| 99  | Doesn't know                                              |                                                                    |                                                                                                                                                                                                             |   |            |   |            |    |              |    |                   |
| 88  | Refused to answer                                         |                                                                    |                                                                                                                                                                                                             |   |            |   |            |    |              |    |                   |
| 384 | [id10159_m]                                               | Did she have any difficulty breathing?                             | radio<br><table border="1"> <tr><td>1</td><td>Yes</td></tr> <tr><td>0</td><td>No</td></tr> <tr><td>99</td><td>Doesn't know</td></tr> <tr><td>88</td><td>Refused to answer</td></tr> </table>                | 1 | Yes        | 0 | No         | 99 | Doesn't know | 88 | Refused to answer |
| 1   | Yes                                                       |                                                                    |                                                                                                                                                                                                             |   |            |   |            |    |              |    |                   |
| 0   | No                                                        |                                                                    |                                                                                                                                                                                                             |   |            |   |            |    |              |    |                   |
| 99  | Doesn't know                                              |                                                                    |                                                                                                                                                                                                             |   |            |   |            |    |              |    |                   |
| 88  | Refused to answer                                         |                                                                    |                                                                                                                                                                                                             |   |            |   |            |    |              |    |                   |
| 385 | [id10161_m]<br>Show the field ONLY if:<br>[id10159_m]='1' | For how many days did the difficulty breathing last?               | text (number)                                                                                                                                                                                               |   |            |   |            |    |              |    |                   |
| 386 | [id10165_m]<br>Show the field ONLY if:<br>[id10159_m]='1' | Was the difficulty continuous or on and off?                       | radio<br><table border="1"> <tr><td>1</td><td>Continuous</td></tr> <tr><td>2</td><td>On and off</td></tr> <tr><td>99</td><td>Doesn't know</td></tr> <tr><td>88</td><td>Refused to answer</td></tr> </table> | 1 | Continuous | 2 | On and off | 99 | Doesn't know | 88 | Refused to answer |
| 1   | Continuous                                                |                                                                    |                                                                                                                                                                                                             |   |            |   |            |    |              |    |                   |
| 2   | On and off                                                |                                                                    |                                                                                                                                                                                                             |   |            |   |            |    |              |    |                   |
| 99  | Doesn't know                                              |                                                                    |                                                                                                                                                                                                             |   |            |   |            |    |              |    |                   |
| 88  | Refused to answer                                         |                                                                    |                                                                                                                                                                                                             |   |            |   |            |    |              |    |                   |
| 387 | [id10166_m]                                               | During the illness that led to death, did she have fast breathing? | radio<br><table border="1"> <tr><td>1</td><td>Yes</td></tr> <tr><td>0</td><td>No</td></tr> <tr><td>99</td><td>Doesn't know</td></tr> <tr><td>88</td><td>Refused to answer</td></tr> </table>                | 1 | Yes        | 0 | No         | 99 | Doesn't know | 88 | Refused to answer |
| 1   | Yes                                                       |                                                                    |                                                                                                                                                                                                             |   |            |   |            |    |              |    |                   |
| 0   | No                                                        |                                                                    |                                                                                                                                                                                                             |   |            |   |            |    |              |    |                   |
| 99  | Doesn't know                                              |                                                                    |                                                                                                                                                                                                             |   |            |   |            |    |              |    |                   |
| 88  | Refused to answer                                         |                                                                    |                                                                                                                                                                                                             |   |            |   |            |    |              |    |                   |
| 388 | [id10167_m]<br>Show the field ONLY if:<br>[id10166_m]='1' | For how many days did the fast breathing last?                     | text (number)                                                                                                                                                                                               |   |            |   |            |    |              |    |                   |
| 389 | [id10168_m]                                               | Did she have breathlessness?                                       | radio<br><table border="1"> <tr><td>1</td><td>Yes</td></tr> <tr><td>0</td><td>No</td></tr> <tr><td>99</td><td>Doesn't know</td></tr> <tr><td>88</td><td>Refused to answer</td></tr> </table>                | 1 | Yes        | 0 | No         | 99 | Doesn't know | 88 | Refused to answer |
| 1   | Yes                                                       |                                                                    |                                                                                                                                                                                                             |   |            |   |            |    |              |    |                   |
| 0   | No                                                        |                                                                    |                                                                                                                                                                                                             |   |            |   |            |    |              |    |                   |
| 99  | Doesn't know                                              |                                                                    |                                                                                                                                                                                                             |   |            |   |            |    |              |    |                   |
| 88  | Refused to answer                                         |                                                                    |                                                                                                                                                                                                             |   |            |   |            |    |              |    |                   |
| 390 | [id10169_m]<br>Show the field ONLY if:<br>[id10168_m]='1' | For how many days did she have breathlessness?                     | text (number)                                                                                                                                                                                               |   |            |   |            |    |              |    |                   |
| 391 | [id10170_m]<br>Show the field ONLY if:<br>[id10168_m]='1' | Was she unable to carry out daily routines due to breathlessness?  | radio<br><table border="1"> <tr><td>1</td><td>Yes</td></tr> <tr><td>0</td><td>No</td></tr> <tr><td>99</td><td>Doesn't know</td></tr> <tr><td>88</td><td>Refused to answer</td></tr> </table>                | 1 | Yes        | 0 | No         | 99 | Doesn't know | 88 | Refused to answer |
| 1   | Yes                                                       |                                                                    |                                                                                                                                                                                                             |   |            |   |            |    |              |    |                   |
| 0   | No                                                        |                                                                    |                                                                                                                                                                                                             |   |            |   |            |    |              |    |                   |
| 99  | Doesn't know                                              |                                                                    |                                                                                                                                                                                                             |   |            |   |            |    |              |    |                   |
| 88  | Refused to answer                                         |                                                                    |                                                                                                                                                                                                             |   |            |   |            |    |              |    |                   |
| 392 | [id10171_m]<br>Show the field ONLY if:<br>[id10168_m]='1' | Was she breathless while lying flat?                               | radio<br><table border="1"> <tr><td>1</td><td>Yes</td></tr> <tr><td>0</td><td>No</td></tr> <tr><td>99</td><td>Doesn't know</td></tr> <tr><td>88</td><td>Refused to answer</td></tr> </table>                | 1 | Yes        | 0 | No         | 99 | Doesn't know | 88 | Refused to answer |
| 1   | Yes                                                       |                                                                    |                                                                                                                                                                                                             |   |            |   |            |    |              |    |                   |
| 0   | No                                                        |                                                                    |                                                                                                                                                                                                             |   |            |   |            |    |              |    |                   |
| 99  | Doesn't know                                              |                                                                    |                                                                                                                                                                                                             |   |            |   |            |    |              |    |                   |
| 88  | Refused to answer                                         |                                                                    |                                                                                                                                                                                                             |   |            |   |            |    |              |    |                   |
| 393 | [id10173_m]                                               | During the illness that led to death did she have wheezing?        | radio<br><table border="1"> <tr><td>1</td><td>Yes</td></tr> <tr><td>0</td><td>No</td></tr> <tr><td>99</td><td>Doesn't know</td></tr> <tr><td>88</td><td>Refused to answer</td></tr> </table>                | 1 | Yes        | 0 | No         | 99 | Doesn't know | 88 | Refused to answer |
| 1   | Yes                                                       |                                                                    |                                                                                                                                                                                                             |   |            |   |            |    |              |    |                   |
| 0   | No                                                        |                                                                    |                                                                                                                                                                                                             |   |            |   |            |    |              |    |                   |
| 99  | Doesn't know                                              |                                                                    |                                                                                                                                                                                                             |   |            |   |            |    |              |    |                   |
| 88  | Refused to answer                                         |                                                                    |                                                                                                                                                                                                             |   |            |   |            |    |              |    |                   |

|     |                                                                              |                                                                                                                                                                                                                                                            |                                                                                                                                                                                              |   |     |   |    |    |              |    |                   |
|-----|------------------------------------------------------------------------------|------------------------------------------------------------------------------------------------------------------------------------------------------------------------------------------------------------------------------------------------------------|----------------------------------------------------------------------------------------------------------------------------------------------------------------------------------------------|---|-----|---|----|----|--------------|----|-------------------|
| 394 | [id10174_m]                                                                  | Did she have chest pain?                                                                                                                                                                                                                                   | radio<br><table border="1"> <tr><td>1</td><td>Yes</td></tr> <tr><td>0</td><td>No</td></tr> <tr><td>99</td><td>Doesn't know</td></tr> <tr><td>88</td><td>Refused to answer</td></tr> </table> | 1 | Yes | 0 | No | 99 | Doesn't know | 88 | Refused to answer |
| 1   | Yes                                                                          |                                                                                                                                                                                                                                                            |                                                                                                                                                                                              |   |     |   |    |    |              |    |                   |
| 0   | No                                                                           |                                                                                                                                                                                                                                                            |                                                                                                                                                                                              |   |     |   |    |    |              |    |                   |
| 99  | Doesn't know                                                                 |                                                                                                                                                                                                                                                            |                                                                                                                                                                                              |   |     |   |    |    |              |    |                   |
| 88  | Refused to answer                                                            |                                                                                                                                                                                                                                                            |                                                                                                                                                                                              |   |     |   |    |    |              |    |                   |
| 395 | [id10175_m]<br>Show the field ONLY if:<br>[id10174_m]='1'                    | Was the chest pain severe?                                                                                                                                                                                                                                 | radio<br><table border="1"> <tr><td>1</td><td>Yes</td></tr> <tr><td>0</td><td>No</td></tr> <tr><td>99</td><td>Doesn't know</td></tr> <tr><td>88</td><td>Refused to answer</td></tr> </table> | 1 | Yes | 0 | No | 99 | Doesn't know | 88 | Refused to answer |
| 1   | Yes                                                                          |                                                                                                                                                                                                                                                            |                                                                                                                                                                                              |   |     |   |    |    |              |    |                   |
| 0   | No                                                                           |                                                                                                                                                                                                                                                            |                                                                                                                                                                                              |   |     |   |    |    |              |    |                   |
| 99  | Doesn't know                                                                 |                                                                                                                                                                                                                                                            |                                                                                                                                                                                              |   |     |   |    |    |              |    |                   |
| 88  | Refused to answer                                                            |                                                                                                                                                                                                                                                            |                                                                                                                                                                                              |   |     |   |    |    |              |    |                   |
| 396 | [id10179_m]<br>Show the field ONLY if:<br>[id10174_m]='1'                    | How long did the chest pain last?                                                                                                                                                                                                                          | text (number)                                                                                                                                                                                |   |     |   |    |    |              |    |                   |
| 397 | [id10181_m]                                                                  | Did she have more frequent loose or liquid stools than usual?<br><i>Ask the respondent about their understanding of what is diarrhea (having more frequent loose or liquid stools than usual); if unclear, explain to the respondent what diarrhea is.</i> | radio<br><table border="1"> <tr><td>1</td><td>Yes</td></tr> <tr><td>0</td><td>No</td></tr> <tr><td>99</td><td>Doesn't know</td></tr> <tr><td>88</td><td>Refused to answer</td></tr> </table> | 1 | Yes | 0 | No | 99 | Doesn't know | 88 | Refused to answer |
| 1   | Yes                                                                          |                                                                                                                                                                                                                                                            |                                                                                                                                                                                              |   |     |   |    |    |              |    |                   |
| 0   | No                                                                           |                                                                                                                                                                                                                                                            |                                                                                                                                                                                              |   |     |   |    |    |              |    |                   |
| 99  | Doesn't know                                                                 |                                                                                                                                                                                                                                                            |                                                                                                                                                                                              |   |     |   |    |    |              |    |                   |
| 88  | Refused to answer                                                            |                                                                                                                                                                                                                                                            |                                                                                                                                                                                              |   |     |   |    |    |              |    |                   |
| 398 | [id10182_m]<br>Show the field ONLY if:<br>[id10181_m]='1'                    | For how many days did she have frequent loose or liquid stools?                                                                                                                                                                                            | text (number)                                                                                                                                                                                |   |     |   |    |    |              |    |                   |
| 399 | [id10186_m]                                                                  | At any time during the final illness was there blood in the stools?                                                                                                                                                                                        | radio<br><table border="1"> <tr><td>1</td><td>Yes</td></tr> <tr><td>0</td><td>No</td></tr> <tr><td>99</td><td>Doesn't know</td></tr> <tr><td>88</td><td>Refused to answer</td></tr> </table> | 1 | Yes | 0 | No | 99 | Doesn't know | 88 | Refused to answer |
| 1   | Yes                                                                          |                                                                                                                                                                                                                                                            |                                                                                                                                                                                              |   |     |   |    |    |              |    |                   |
| 0   | No                                                                           |                                                                                                                                                                                                                                                            |                                                                                                                                                                                              |   |     |   |    |    |              |    |                   |
| 99  | Doesn't know                                                                 |                                                                                                                                                                                                                                                            |                                                                                                                                                                                              |   |     |   |    |    |              |    |                   |
| 88  | Refused to answer                                                            |                                                                                                                                                                                                                                                            |                                                                                                                                                                                              |   |     |   |    |    |              |    |                   |
| 400 | [id10187_m]<br>Show the field ONLY if:<br>[id10186_m]='1'                    | Was there blood in the stool up until death?                                                                                                                                                                                                               | radio<br><table border="1"> <tr><td>1</td><td>Yes</td></tr> <tr><td>0</td><td>No</td></tr> <tr><td>99</td><td>Doesn't know</td></tr> <tr><td>88</td><td>Refused to answer</td></tr> </table> | 1 | Yes | 0 | No | 99 | Doesn't know | 88 | Refused to answer |
| 1   | Yes                                                                          |                                                                                                                                                                                                                                                            |                                                                                                                                                                                              |   |     |   |    |    |              |    |                   |
| 0   | No                                                                           |                                                                                                                                                                                                                                                            |                                                                                                                                                                                              |   |     |   |    |    |              |    |                   |
| 99  | Doesn't know                                                                 |                                                                                                                                                                                                                                                            |                                                                                                                                                                                              |   |     |   |    |    |              |    |                   |
| 88  | Refused to answer                                                            |                                                                                                                                                                                                                                                            |                                                                                                                                                                                              |   |     |   |    |    |              |    |                   |
| 401 | [id10188_m]                                                                  | Did she vomit?                                                                                                                                                                                                                                             | radio<br><table border="1"> <tr><td>1</td><td>Yes</td></tr> <tr><td>0</td><td>No</td></tr> <tr><td>99</td><td>Doesn't know</td></tr> <tr><td>88</td><td>Refused to answer</td></tr> </table> | 1 | Yes | 0 | No | 99 | Doesn't know | 88 | Refused to answer |
| 1   | Yes                                                                          |                                                                                                                                                                                                                                                            |                                                                                                                                                                                              |   |     |   |    |    |              |    |                   |
| 0   | No                                                                           |                                                                                                                                                                                                                                                            |                                                                                                                                                                                              |   |     |   |    |    |              |    |                   |
| 99  | Doesn't know                                                                 |                                                                                                                                                                                                                                                            |                                                                                                                                                                                              |   |     |   |    |    |              |    |                   |
| 88  | Refused to answer                                                            |                                                                                                                                                                                                                                                            |                                                                                                                                                                                              |   |     |   |    |    |              |    |                   |
| 402 | [id10189_m]                                                                  | To clarify: Did she vomit in the week preceding the death?                                                                                                                                                                                                 | radio<br><table border="1"> <tr><td>1</td><td>Yes</td></tr> <tr><td>0</td><td>No</td></tr> <tr><td>99</td><td>Doesn't know</td></tr> <tr><td>88</td><td>Refused to answer</td></tr> </table> | 1 | Yes | 0 | No | 99 | Doesn't know | 88 | Refused to answer |
| 1   | Yes                                                                          |                                                                                                                                                                                                                                                            |                                                                                                                                                                                              |   |     |   |    |    |              |    |                   |
| 0   | No                                                                           |                                                                                                                                                                                                                                                            |                                                                                                                                                                                              |   |     |   |    |    |              |    |                   |
| 99  | Doesn't know                                                                 |                                                                                                                                                                                                                                                            |                                                                                                                                                                                              |   |     |   |    |    |              |    |                   |
| 88  | Refused to answer                                                            |                                                                                                                                                                                                                                                            |                                                                                                                                                                                              |   |     |   |    |    |              |    |                   |
| 403 | [id10190_m]<br>Show the field ONLY if:<br>[id10188_m]='1' or [id10189_m]='1' | How long before death did she vomit? (in days)                                                                                                                                                                                                             | text (number)                                                                                                                                                                                |   |     |   |    |    |              |    |                   |
| 404 | [id10192_m]<br>Show the field ONLY if:<br>[id10188_m]='1' or [id10189_m]='1' | Was the vomit black?                                                                                                                                                                                                                                       | radio<br><table border="1"> <tr><td>1</td><td>Yes</td></tr> <tr><td>0</td><td>No</td></tr> <tr><td>99</td><td>Doesn't know</td></tr> <tr><td>88</td><td>Refused to answer</td></tr> </table> | 1 | Yes | 0 | No | 99 | Doesn't know | 88 | Refused to answer |
| 1   | Yes                                                                          |                                                                                                                                                                                                                                                            |                                                                                                                                                                                              |   |     |   |    |    |              |    |                   |
| 0   | No                                                                           |                                                                                                                                                                                                                                                            |                                                                                                                                                                                              |   |     |   |    |    |              |    |                   |
| 99  | Doesn't know                                                                 |                                                                                                                                                                                                                                                            |                                                                                                                                                                                              |   |     |   |    |    |              |    |                   |
| 88  | Refused to answer                                                            |                                                                                                                                                                                                                                                            |                                                                                                                                                                                              |   |     |   |    |    |              |    |                   |

|     |                                                           |                                                                                                                                            |                                                                                                                                                                                                                                                                       |   |               |   |               |    |                         |    |                   |    |                   |
|-----|-----------------------------------------------------------|--------------------------------------------------------------------------------------------------------------------------------------------|-----------------------------------------------------------------------------------------------------------------------------------------------------------------------------------------------------------------------------------------------------------------------|---|---------------|---|---------------|----|-------------------------|----|-------------------|----|-------------------|
| 405 | [id10193_m]                                               | Did she have any belly (abdominal) problem?<br><i>Explain to the respondent that problems could be pain, protruding abdomen or a mass.</i> | radio<br><table border="1"> <tr><td>1</td><td>Yes</td></tr> <tr><td>0</td><td>No</td></tr> <tr><td>99</td><td>Doesn't know</td></tr> <tr><td>88</td><td>Refused to answer</td></tr> </table>                                                                          | 1 | Yes           | 0 | No            | 99 | Doesn't know            | 88 | Refused to answer |    |                   |
| 1   | Yes                                                       |                                                                                                                                            |                                                                                                                                                                                                                                                                       |   |               |   |               |    |                         |    |                   |    |                   |
| 0   | No                                                        |                                                                                                                                            |                                                                                                                                                                                                                                                                       |   |               |   |               |    |                         |    |                   |    |                   |
| 99  | Doesn't know                                              |                                                                                                                                            |                                                                                                                                                                                                                                                                       |   |               |   |               |    |                         |    |                   |    |                   |
| 88  | Refused to answer                                         |                                                                                                                                            |                                                                                                                                                                                                                                                                       |   |               |   |               |    |                         |    |                   |    |                   |
| 406 | [id10194_m]                                               | Did she have belly (abdominal) pain?                                                                                                       | radio<br><table border="1"> <tr><td>1</td><td>Yes</td></tr> <tr><td>0</td><td>No</td></tr> <tr><td>99</td><td>Doesn't know</td></tr> <tr><td>88</td><td>Refused to answer</td></tr> </table>                                                                          | 1 | Yes           | 0 | No            | 99 | Doesn't know            | 88 | Refused to answer |    |                   |
| 1   | Yes                                                       |                                                                                                                                            |                                                                                                                                                                                                                                                                       |   |               |   |               |    |                         |    |                   |    |                   |
| 0   | No                                                        |                                                                                                                                            |                                                                                                                                                                                                                                                                       |   |               |   |               |    |                         |    |                   |    |                   |
| 99  | Doesn't know                                              |                                                                                                                                            |                                                                                                                                                                                                                                                                       |   |               |   |               |    |                         |    |                   |    |                   |
| 88  | Refused to answer                                         |                                                                                                                                            |                                                                                                                                                                                                                                                                       |   |               |   |               |    |                         |    |                   |    |                   |
| 407 | [id10195_m]<br>Show the field ONLY if:<br>[id10194_m]='1' | Was the belly (abdominal) pain severe?                                                                                                     | radio<br><table border="1"> <tr><td>1</td><td>Yes</td></tr> <tr><td>0</td><td>No</td></tr> <tr><td>99</td><td>Doesn't know</td></tr> <tr><td>88</td><td>Refused to answer</td></tr> </table>                                                                          | 1 | Yes           | 0 | No            | 99 | Doesn't know            | 88 | Refused to answer |    |                   |
| 1   | Yes                                                       |                                                                                                                                            |                                                                                                                                                                                                                                                                       |   |               |   |               |    |                         |    |                   |    |                   |
| 0   | No                                                        |                                                                                                                                            |                                                                                                                                                                                                                                                                       |   |               |   |               |    |                         |    |                   |    |                   |
| 99  | Doesn't know                                              |                                                                                                                                            |                                                                                                                                                                                                                                                                       |   |               |   |               |    |                         |    |                   |    |                   |
| 88  | Refused to answer                                         |                                                                                                                                            |                                                                                                                                                                                                                                                                       |   |               |   |               |    |                         |    |                   |    |                   |
| 408 | [id10197_m]<br>Show the field ONLY if:<br>[id10194_m]='1' | For how long did she have belly (abdominal) pain? (in days)                                                                                | text (number)                                                                                                                                                                                                                                                         |   |               |   |               |    |                         |    |                   |    |                   |
| 409 | [id10199_m]<br>Show the field ONLY if:<br>[id10194_m]='1' | Was the pain in the upper or lower belly (abdomen)?                                                                                        | radio<br><table border="1"> <tr><td>1</td><td>Upper abdomen</td></tr> <tr><td>2</td><td>Lower abdomen</td></tr> <tr><td>3</td><td>Upper and lower abdomen</td></tr> <tr><td>99</td><td>Doesn't know</td></tr> <tr><td>88</td><td>Refused to answer</td></tr> </table> | 1 | Upper abdomen | 2 | Lower abdomen | 3  | Upper and lower abdomen | 99 | Doesn't know      | 88 | Refused to answer |
| 1   | Upper abdomen                                             |                                                                                                                                            |                                                                                                                                                                                                                                                                       |   |               |   |               |    |                         |    |                   |    |                   |
| 2   | Lower abdomen                                             |                                                                                                                                            |                                                                                                                                                                                                                                                                       |   |               |   |               |    |                         |    |                   |    |                   |
| 3   | Upper and lower abdomen                                   |                                                                                                                                            |                                                                                                                                                                                                                                                                       |   |               |   |               |    |                         |    |                   |    |                   |
| 99  | Doesn't know                                              |                                                                                                                                            |                                                                                                                                                                                                                                                                       |   |               |   |               |    |                         |    |                   |    |                   |
| 88  | Refused to answer                                         |                                                                                                                                            |                                                                                                                                                                                                                                                                       |   |               |   |               |    |                         |    |                   |    |                   |
| 410 | [id10200_m]                                               | Did she have a more than usually protruding belly (abdomen)?                                                                               | radio<br><table border="1"> <tr><td>1</td><td>Yes</td></tr> <tr><td>0</td><td>No</td></tr> <tr><td>99</td><td>Doesn't know</td></tr> <tr><td>88</td><td>Refused to answer</td></tr> </table>                                                                          | 1 | Yes           | 0 | No            | 99 | Doesn't know            | 88 | Refused to answer |    |                   |
| 1   | Yes                                                       |                                                                                                                                            |                                                                                                                                                                                                                                                                       |   |               |   |               |    |                         |    |                   |    |                   |
| 0   | No                                                        |                                                                                                                                            |                                                                                                                                                                                                                                                                       |   |               |   |               |    |                         |    |                   |    |                   |
| 99  | Doesn't know                                              |                                                                                                                                            |                                                                                                                                                                                                                                                                       |   |               |   |               |    |                         |    |                   |    |                   |
| 88  | Refused to answer                                         |                                                                                                                                            |                                                                                                                                                                                                                                                                       |   |               |   |               |    |                         |    |                   |    |                   |
| 411 | [id10201_m]<br>Show the field ONLY if:<br>[id10200_m]='1' | For how long before death did she have a more than usually protruding belly (abdomen)? (in days)                                           | text (number)                                                                                                                                                                                                                                                         |   |               |   |               |    |                         |    |                   |    |                   |
| 412 | [id10203_m]<br>Show the field ONLY if:<br>[id10200_m]='1' | How rapidly did she develop the protruding belly (abdomen)?                                                                                | radio<br><table border="1"> <tr><td>1</td><td>Rapidly</td></tr> <tr><td>2</td><td>Slowly</td></tr> <tr><td>99</td><td>Doesn't know</td></tr> <tr><td>88</td><td>Refused to answer</td></tr> </table>                                                                  | 1 | Rapidly       | 2 | Slowly        | 99 | Doesn't know            | 88 | Refused to answer |    |                   |
| 1   | Rapidly                                                   |                                                                                                                                            |                                                                                                                                                                                                                                                                       |   |               |   |               |    |                         |    |                   |    |                   |
| 2   | Slowly                                                    |                                                                                                                                            |                                                                                                                                                                                                                                                                       |   |               |   |               |    |                         |    |                   |    |                   |
| 99  | Doesn't know                                              |                                                                                                                                            |                                                                                                                                                                                                                                                                       |   |               |   |               |    |                         |    |                   |    |                   |
| 88  | Refused to answer                                         |                                                                                                                                            |                                                                                                                                                                                                                                                                       |   |               |   |               |    |                         |    |                   |    |                   |
| 413 | [id10204_m]                                               | Did she have any mass in the belly (abdomen)?                                                                                              | radio<br><table border="1"> <tr><td>1</td><td>Yes</td></tr> <tr><td>0</td><td>No</td></tr> <tr><td>99</td><td>Doesn't know</td></tr> <tr><td>88</td><td>Refused to answer</td></tr> </table>                                                                          | 1 | Yes           | 0 | No            | 99 | Doesn't know            | 88 | Refused to answer |    |                   |
| 1   | Yes                                                       |                                                                                                                                            |                                                                                                                                                                                                                                                                       |   |               |   |               |    |                         |    |                   |    |                   |
| 0   | No                                                        |                                                                                                                                            |                                                                                                                                                                                                                                                                       |   |               |   |               |    |                         |    |                   |    |                   |
| 99  | Doesn't know                                              |                                                                                                                                            |                                                                                                                                                                                                                                                                       |   |               |   |               |    |                         |    |                   |    |                   |
| 88  | Refused to answer                                         |                                                                                                                                            |                                                                                                                                                                                                                                                                       |   |               |   |               |    |                         |    |                   |    |                   |
| 414 | [id10205_m]<br>Show the field ONLY if:<br>[id10204_m]='1' | For how long did she have a mass in the belly (abdomen)? (in days)                                                                         | text (number)                                                                                                                                                                                                                                                         |   |               |   |               |    |                         |    |                   |    |                   |
| 415 | [id10207_m]                                               | Did she have a severe headache?                                                                                                            | radio<br><table border="1"> <tr><td>1</td><td>Yes</td></tr> <tr><td>0</td><td>No</td></tr> <tr><td>99</td><td>Doesn't know</td></tr> <tr><td>88</td><td>Refused to answer</td></tr> </table>                                                                          | 1 | Yes           | 0 | No            | 99 | Doesn't know            | 88 | Refused to answer |    |                   |
| 1   | Yes                                                       |                                                                                                                                            |                                                                                                                                                                                                                                                                       |   |               |   |               |    |                         |    |                   |    |                   |
| 0   | No                                                        |                                                                                                                                            |                                                                                                                                                                                                                                                                       |   |               |   |               |    |                         |    |                   |    |                   |
| 99  | Doesn't know                                              |                                                                                                                                            |                                                                                                                                                                                                                                                                       |   |               |   |               |    |                         |    |                   |    |                   |
| 88  | Refused to answer                                         |                                                                                                                                            |                                                                                                                                                                                                                                                                       |   |               |   |               |    |                         |    |                   |    |                   |

|     |                                                           |                                                                                 |                                                                                                                                                                                              |   |     |   |    |    |              |    |                   |
|-----|-----------------------------------------------------------|---------------------------------------------------------------------------------|----------------------------------------------------------------------------------------------------------------------------------------------------------------------------------------------|---|-----|---|----|----|--------------|----|-------------------|
| 416 | [id10208_m]                                               | Did she have a stiff neck during illness that led to death?                     | radio<br><table border="1"> <tr><td>1</td><td>Yes</td></tr> <tr><td>0</td><td>No</td></tr> <tr><td>99</td><td>Doesn't know</td></tr> <tr><td>88</td><td>Refused to answer</td></tr> </table> | 1 | Yes | 0 | No | 99 | Doesn't know | 88 | Refused to answer |
| 1   | Yes                                                       |                                                                                 |                                                                                                                                                                                              |   |     |   |    |    |              |    |                   |
| 0   | No                                                        |                                                                                 |                                                                                                                                                                                              |   |     |   |    |    |              |    |                   |
| 99  | Doesn't know                                              |                                                                                 |                                                                                                                                                                                              |   |     |   |    |    |              |    |                   |
| 88  | Refused to answer                                         |                                                                                 |                                                                                                                                                                                              |   |     |   |    |    |              |    |                   |
| 417 | [id10209_m]<br>Show the field ONLY if:<br>[id10208_m]='1' | How long before death did she have a stiff neck? (in days)                      | text (number)                                                                                                                                                                                |   |     |   |    |    |              |    |                   |
| 418 | [id10210_m]                                               | Did she have a painful neck during the illness that led to death?               | radio<br><table border="1"> <tr><td>1</td><td>Yes</td></tr> <tr><td>0</td><td>No</td></tr> <tr><td>99</td><td>Doesn't know</td></tr> <tr><td>88</td><td>Refused to answer</td></tr> </table> | 1 | Yes | 0 | No | 99 | Doesn't know | 88 | Refused to answer |
| 1   | Yes                                                       |                                                                                 |                                                                                                                                                                                              |   |     |   |    |    |              |    |                   |
| 0   | No                                                        |                                                                                 |                                                                                                                                                                                              |   |     |   |    |    |              |    |                   |
| 99  | Doesn't know                                              |                                                                                 |                                                                                                                                                                                              |   |     |   |    |    |              |    |                   |
| 88  | Refused to answer                                         |                                                                                 |                                                                                                                                                                                              |   |     |   |    |    |              |    |                   |
| 419 | [id10211_m]<br>Show the field ONLY if:<br>[id10210_m]='1' | For how many days before death did she have a painful neck?                     | text (number)                                                                                                                                                                                |   |     |   |    |    |              |    |                   |
| 420 | [id10212_m]                                               | Did she have mental confusion?                                                  | radio<br><table border="1"> <tr><td>1</td><td>Yes</td></tr> <tr><td>0</td><td>No</td></tr> <tr><td>99</td><td>Doesn't know</td></tr> <tr><td>88</td><td>Refused to answer</td></tr> </table> | 1 | Yes | 0 | No | 99 | Doesn't know | 88 | Refused to answer |
| 1   | Yes                                                       |                                                                                 |                                                                                                                                                                                              |   |     |   |    |    |              |    |                   |
| 0   | No                                                        |                                                                                 |                                                                                                                                                                                              |   |     |   |    |    |              |    |                   |
| 99  | Doesn't know                                              |                                                                                 |                                                                                                                                                                                              |   |     |   |    |    |              |    |                   |
| 88  | Refused to answer                                         |                                                                                 |                                                                                                                                                                                              |   |     |   |    |    |              |    |                   |
| 421 | [id10213_m]<br>Show the field ONLY if:<br>[id10212_m]='1' | How long did she have mental confusion? (in days)                               | text (number)                                                                                                                                                                                |   |     |   |    |    |              |    |                   |
| 422 | [id10214_m]                                               | Was she unconscious during the illness that led to death?                       | radio<br><table border="1"> <tr><td>1</td><td>Yes</td></tr> <tr><td>0</td><td>No</td></tr> <tr><td>99</td><td>Doesn't know</td></tr> <tr><td>88</td><td>Refused to answer</td></tr> </table> | 1 | Yes | 0 | No | 99 | Doesn't know | 88 | Refused to answer |
| 1   | Yes                                                       |                                                                                 |                                                                                                                                                                                              |   |     |   |    |    |              |    |                   |
| 0   | No                                                        |                                                                                 |                                                                                                                                                                                              |   |     |   |    |    |              |    |                   |
| 99  | Doesn't know                                              |                                                                                 |                                                                                                                                                                                              |   |     |   |    |    |              |    |                   |
| 88  | Refused to answer                                         |                                                                                 |                                                                                                                                                                                              |   |     |   |    |    |              |    |                   |
| 423 | [id10215_m]<br>Show the field ONLY if:<br>[id10214_m]='1' | Was she unconscious for more than 24 hours before death?                        | radio<br><table border="1"> <tr><td>1</td><td>Yes</td></tr> <tr><td>0</td><td>No</td></tr> <tr><td>99</td><td>Doesn't know</td></tr> <tr><td>88</td><td>Refused to answer</td></tr> </table> | 1 | Yes | 0 | No | 99 | Doesn't know | 88 | Refused to answer |
| 1   | Yes                                                       |                                                                                 |                                                                                                                                                                                              |   |     |   |    |    |              |    |                   |
| 0   | No                                                        |                                                                                 |                                                                                                                                                                                              |   |     |   |    |    |              |    |                   |
| 99  | Doesn't know                                              |                                                                                 |                                                                                                                                                                                              |   |     |   |    |    |              |    |                   |
| 88  | Refused to answer                                         |                                                                                 |                                                                                                                                                                                              |   |     |   |    |    |              |    |                   |
| 424 | [id10217_m]<br>Show the field ONLY if:<br>[id10214_m]='1' | Did the unconsciousness start suddenly, quickly (at least within a single day)? | radio<br><table border="1"> <tr><td>1</td><td>Yes</td></tr> <tr><td>0</td><td>No</td></tr> <tr><td>99</td><td>Doesn't know</td></tr> <tr><td>88</td><td>Refused to answer</td></tr> </table> | 1 | Yes | 0 | No | 99 | Doesn't know | 88 | Refused to answer |
| 1   | Yes                                                       |                                                                                 |                                                                                                                                                                                              |   |     |   |    |    |              |    |                   |
| 0   | No                                                        |                                                                                 |                                                                                                                                                                                              |   |     |   |    |    |              |    |                   |
| 99  | Doesn't know                                              |                                                                                 |                                                                                                                                                                                              |   |     |   |    |    |              |    |                   |
| 88  | Refused to answer                                         |                                                                                 |                                                                                                                                                                                              |   |     |   |    |    |              |    |                   |
| 425 | [id10218_m]<br>Show the field ONLY if:<br>[id10214_m]='1' | Did the unconsciousness continue until death?                                   | radio<br><table border="1"> <tr><td>1</td><td>Yes</td></tr> <tr><td>0</td><td>No</td></tr> <tr><td>99</td><td>Doesn't know</td></tr> <tr><td>88</td><td>Refused to answer</td></tr> </table> | 1 | Yes | 0 | No | 99 | Doesn't know | 88 | Refused to answer |
| 1   | Yes                                                       |                                                                                 |                                                                                                                                                                                              |   |     |   |    |    |              |    |                   |
| 0   | No                                                        |                                                                                 |                                                                                                                                                                                              |   |     |   |    |    |              |    |                   |
| 99  | Doesn't know                                              |                                                                                 |                                                                                                                                                                                              |   |     |   |    |    |              |    |                   |
| 88  | Refused to answer                                         |                                                                                 |                                                                                                                                                                                              |   |     |   |    |    |              |    |                   |
| 426 | [id10219_m]                                               | Did she have convulsions?                                                       | radio<br><table border="1"> <tr><td>1</td><td>Yes</td></tr> <tr><td>0</td><td>No</td></tr> <tr><td>99</td><td>Doesn't know</td></tr> <tr><td>88</td><td>Refused to answer</td></tr> </table> | 1 | Yes | 0 | No | 99 | Doesn't know | 88 | Refused to answer |
| 1   | Yes                                                       |                                                                                 |                                                                                                                                                                                              |   |     |   |    |    |              |    |                   |
| 0   | No                                                        |                                                                                 |                                                                                                                                                                                              |   |     |   |    |    |              |    |                   |
| 99  | Doesn't know                                              |                                                                                 |                                                                                                                                                                                              |   |     |   |    |    |              |    |                   |
| 88  | Refused to answer                                         |                                                                                 |                                                                                                                                                                                              |   |     |   |    |    |              |    |                   |

|     |                                                           |                                                                                                                                                                                                                                    |                                                                                                                                                                                              |   |     |   |    |    |              |    |                   |
|-----|-----------------------------------------------------------|------------------------------------------------------------------------------------------------------------------------------------------------------------------------------------------------------------------------------------|----------------------------------------------------------------------------------------------------------------------------------------------------------------------------------------------|---|-----|---|----|----|--------------|----|-------------------|
| 427 | [id10221_m]<br>Show the field ONLY if:<br>[id10219_m]='1' | For how many minutes did the convulsions last?<br><i>The answer could be given in another unit, but for data entry use minutes. Less than 1 minute=0; 1 hour=60 minutes. Enter "99" for "don't know." Enter "88" for "refuse."</i> | text                                                                                                                                                                                         |   |     |   |    |    |              |    |                   |
| 428 | [id10222_m]<br>Show the field ONLY if:<br>[id10219_m]='1' | Did she become unconscious immediately after the convulsion?                                                                                                                                                                       | radio<br><table border="1"> <tr><td>1</td><td>Yes</td></tr> <tr><td>0</td><td>No</td></tr> <tr><td>99</td><td>Doesn't know</td></tr> <tr><td>88</td><td>Refused to answer</td></tr> </table> | 1 | Yes | 0 | No | 99 | Doesn't know | 88 | Refused to answer |
| 1   | Yes                                                       |                                                                                                                                                                                                                                    |                                                                                                                                                                                              |   |     |   |    |    |              |    |                   |
| 0   | No                                                        |                                                                                                                                                                                                                                    |                                                                                                                                                                                              |   |     |   |    |    |              |    |                   |
| 99  | Doesn't know                                              |                                                                                                                                                                                                                                    |                                                                                                                                                                                              |   |     |   |    |    |              |    |                   |
| 88  | Refused to answer                                         |                                                                                                                                                                                                                                    |                                                                                                                                                                                              |   |     |   |    |    |              |    |                   |
| 429 | [id10223_m]                                               | Did she have any urine problems?<br><i>Explain to the respondent that urine problems refer to urinating a lot or not at all, and blood in the urine.</i>                                                                           | radio<br><table border="1"> <tr><td>1</td><td>Yes</td></tr> <tr><td>0</td><td>No</td></tr> <tr><td>99</td><td>Doesn't know</td></tr> <tr><td>88</td><td>Refused to answer</td></tr> </table> | 1 | Yes | 0 | No | 99 | Doesn't know | 88 | Refused to answer |
| 1   | Yes                                                       |                                                                                                                                                                                                                                    |                                                                                                                                                                                              |   |     |   |    |    |              |    |                   |
| 0   | No                                                        |                                                                                                                                                                                                                                    |                                                                                                                                                                                              |   |     |   |    |    |              |    |                   |
| 99  | Doesn't know                                              |                                                                                                                                                                                                                                    |                                                                                                                                                                                              |   |     |   |    |    |              |    |                   |
| 88  | Refused to answer                                         |                                                                                                                                                                                                                                    |                                                                                                                                                                                              |   |     |   |    |    |              |    |                   |
| 430 | [id10225_m]<br>Show the field ONLY if:<br>[id10223_m]='1' | Did she go to urinate more often than usual?                                                                                                                                                                                       | radio<br><table border="1"> <tr><td>1</td><td>Yes</td></tr> <tr><td>0</td><td>No</td></tr> <tr><td>99</td><td>Doesn't know</td></tr> <tr><td>88</td><td>Refused to answer</td></tr> </table> | 1 | Yes | 0 | No | 99 | Doesn't know | 88 | Refused to answer |
| 1   | Yes                                                       |                                                                                                                                                                                                                                    |                                                                                                                                                                                              |   |     |   |    |    |              |    |                   |
| 0   | No                                                        |                                                                                                                                                                                                                                    |                                                                                                                                                                                              |   |     |   |    |    |              |    |                   |
| 99  | Doesn't know                                              |                                                                                                                                                                                                                                    |                                                                                                                                                                                              |   |     |   |    |    |              |    |                   |
| 88  | Refused to answer                                         |                                                                                                                                                                                                                                    |                                                                                                                                                                                              |   |     |   |    |    |              |    |                   |
| 431 | [id10226_m]<br>Show the field ONLY if:<br>[id10223_m]='1' | During the final illness did she ever pass blood in the urine?                                                                                                                                                                     | radio<br><table border="1"> <tr><td>1</td><td>Yes</td></tr> <tr><td>0</td><td>No</td></tr> <tr><td>99</td><td>Doesn't know</td></tr> <tr><td>88</td><td>Refused to answer</td></tr> </table> | 1 | Yes | 0 | No | 99 | Doesn't know | 88 | Refused to answer |
| 1   | Yes                                                       |                                                                                                                                                                                                                                    |                                                                                                                                                                                              |   |     |   |    |    |              |    |                   |
| 0   | No                                                        |                                                                                                                                                                                                                                    |                                                                                                                                                                                              |   |     |   |    |    |              |    |                   |
| 99  | Doesn't know                                              |                                                                                                                                                                                                                                    |                                                                                                                                                                                              |   |     |   |    |    |              |    |                   |
| 88  | Refused to answer                                         |                                                                                                                                                                                                                                    |                                                                                                                                                                                              |   |     |   |    |    |              |    |                   |
| 432 | [id10224_m]<br>Show the field ONLY if:<br>[id10223_m]='1' | Did she stop urinating?                                                                                                                                                                                                            | radio<br><table border="1"> <tr><td>1</td><td>Yes</td></tr> <tr><td>0</td><td>No</td></tr> <tr><td>99</td><td>Doesn't know</td></tr> <tr><td>88</td><td>Refused to answer</td></tr> </table> | 1 | Yes | 0 | No | 99 | Doesn't know | 88 | Refused to answer |
| 1   | Yes                                                       |                                                                                                                                                                                                                                    |                                                                                                                                                                                              |   |     |   |    |    |              |    |                   |
| 0   | No                                                        |                                                                                                                                                                                                                                    |                                                                                                                                                                                              |   |     |   |    |    |              |    |                   |
| 99  | Doesn't know                                              |                                                                                                                                                                                                                                    |                                                                                                                                                                                              |   |     |   |    |    |              |    |                   |
| 88  | Refused to answer                                         |                                                                                                                                                                                                                                    |                                                                                                                                                                                              |   |     |   |    |    |              |    |                   |
| 433 | [id10227_m]                                               | Did she have sores or ulcers anywhere on the body?                                                                                                                                                                                 | radio<br><table border="1"> <tr><td>1</td><td>Yes</td></tr> <tr><td>0</td><td>No</td></tr> <tr><td>99</td><td>Doesn't know</td></tr> <tr><td>88</td><td>Refused to answer</td></tr> </table> | 1 | Yes | 0 | No | 99 | Doesn't know | 88 | Refused to answer |
| 1   | Yes                                                       |                                                                                                                                                                                                                                    |                                                                                                                                                                                              |   |     |   |    |    |              |    |                   |
| 0   | No                                                        |                                                                                                                                                                                                                                    |                                                                                                                                                                                              |   |     |   |    |    |              |    |                   |
| 99  | Doesn't know                                              |                                                                                                                                                                                                                                    |                                                                                                                                                                                              |   |     |   |    |    |              |    |                   |
| 88  | Refused to answer                                         |                                                                                                                                                                                                                                    |                                                                                                                                                                                              |   |     |   |    |    |              |    |                   |
| 434 | [id10228_m]<br>Show the field ONLY if:<br>[id10227_m]='1' | Did she have sores?                                                                                                                                                                                                                | radio<br><table border="1"> <tr><td>1</td><td>Yes</td></tr> <tr><td>0</td><td>No</td></tr> <tr><td>99</td><td>Doesn't know</td></tr> <tr><td>88</td><td>Refused to answer</td></tr> </table> | 1 | Yes | 0 | No | 99 | Doesn't know | 88 | Refused to answer |
| 1   | Yes                                                       |                                                                                                                                                                                                                                    |                                                                                                                                                                                              |   |     |   |    |    |              |    |                   |
| 0   | No                                                        |                                                                                                                                                                                                                                    |                                                                                                                                                                                              |   |     |   |    |    |              |    |                   |
| 99  | Doesn't know                                              |                                                                                                                                                                                                                                    |                                                                                                                                                                                              |   |     |   |    |    |              |    |                   |
| 88  | Refused to answer                                         |                                                                                                                                                                                                                                    |                                                                                                                                                                                              |   |     |   |    |    |              |    |                   |
| 435 | [id10229_m]<br>Show the field ONLY if:<br>[id10228_m]='1' | Did the sores have clear fluid or pus?                                                                                                                                                                                             | radio<br><table border="1"> <tr><td>1</td><td>Yes</td></tr> <tr><td>0</td><td>No</td></tr> <tr><td>99</td><td>Doesn't know</td></tr> <tr><td>88</td><td>Refused to answer</td></tr> </table> | 1 | Yes | 0 | No | 99 | Doesn't know | 88 | Refused to answer |
| 1   | Yes                                                       |                                                                                                                                                                                                                                    |                                                                                                                                                                                              |   |     |   |    |    |              |    |                   |
| 0   | No                                                        |                                                                                                                                                                                                                                    |                                                                                                                                                                                              |   |     |   |    |    |              |    |                   |
| 99  | Doesn't know                                              |                                                                                                                                                                                                                                    |                                                                                                                                                                                              |   |     |   |    |    |              |    |                   |
| 88  | Refused to answer                                         |                                                                                                                                                                                                                                    |                                                                                                                                                                                              |   |     |   |    |    |              |    |                   |
| 436 | [id10230_m]<br>Show the field ONLY if:<br>[id10227_m]='1' | Did she have an ulcer (pit) on the foot?                                                                                                                                                                                           | radio<br><table border="1"> <tr><td>1</td><td>Yes</td></tr> <tr><td>0</td><td>No</td></tr> <tr><td>99</td><td>Doesn't know</td></tr> <tr><td>88</td><td>Refused to answer</td></tr> </table> | 1 | Yes | 0 | No | 99 | Doesn't know | 88 | Refused to answer |
| 1   | Yes                                                       |                                                                                                                                                                                                                                    |                                                                                                                                                                                              |   |     |   |    |    |              |    |                   |
| 0   | No                                                        |                                                                                                                                                                                                                                    |                                                                                                                                                                                              |   |     |   |    |    |              |    |                   |
| 99  | Doesn't know                                              |                                                                                                                                                                                                                                    |                                                                                                                                                                                              |   |     |   |    |    |              |    |                   |
| 88  | Refused to answer                                         |                                                                                                                                                                                                                                    |                                                                                                                                                                                              |   |     |   |    |    |              |    |                   |

|     |                                                           |                                                                                                                                                                                                                                                             |                                                                                                                                                                                                                                                                                          |   |              |      |    |              |                  |    |                   |             |   |              |            |
|-----|-----------------------------------------------------------|-------------------------------------------------------------------------------------------------------------------------------------------------------------------------------------------------------------------------------------------------------------|------------------------------------------------------------------------------------------------------------------------------------------------------------------------------------------------------------------------------------------------------------------------------------------|---|--------------|------|----|--------------|------------------|----|-------------------|-------------|---|--------------|------------|
| 437 | [id10231_m]<br>Show the field ONLY if:<br>[id10230_m]='1' | Did the ulcer on the foot ooze pus?                                                                                                                                                                                                                         | radio<br><table border="1"> <tr><td>1</td><td>Yes</td></tr> <tr><td>0</td><td>No</td></tr> <tr><td>99</td><td>Doesn't know</td></tr> <tr><td>88</td><td>Refused to answer</td></tr> </table>                                                                                             | 1 | Yes          | 0    | No | 99           | Doesn't know     | 88 | Refused to answer |             |   |              |            |
| 1   | Yes                                                       |                                                                                                                                                                                                                                                             |                                                                                                                                                                                                                                                                                          |   |              |      |    |              |                  |    |                   |             |   |              |            |
| 0   | No                                                        |                                                                                                                                                                                                                                                             |                                                                                                                                                                                                                                                                                          |   |              |      |    |              |                  |    |                   |             |   |              |            |
| 99  | Doesn't know                                              |                                                                                                                                                                                                                                                             |                                                                                                                                                                                                                                                                                          |   |              |      |    |              |                  |    |                   |             |   |              |            |
| 88  | Refused to answer                                         |                                                                                                                                                                                                                                                             |                                                                                                                                                                                                                                                                                          |   |              |      |    |              |                  |    |                   |             |   |              |            |
| 438 | [id10232_m]<br>Show the field ONLY if:<br>[id10231_m]='1' | For how many days did the ulcer on the foot ooze pus?                                                                                                                                                                                                       | text                                                                                                                                                                                                                                                                                     |   |              |      |    |              |                  |    |                   |             |   |              |            |
| 439 | [id10233_m]                                               | During the illness that led to death, did she have any skin rash?                                                                                                                                                                                           | radio<br><table border="1"> <tr><td>1</td><td>Yes</td></tr> <tr><td>0</td><td>No</td></tr> <tr><td>99</td><td>Doesn't know</td></tr> <tr><td>88</td><td>Refused to answer</td></tr> </table>                                                                                             | 1 | Yes          | 0    | No | 99           | Doesn't know     | 88 | Refused to answer |             |   |              |            |
| 1   | Yes                                                       |                                                                                                                                                                                                                                                             |                                                                                                                                                                                                                                                                                          |   |              |      |    |              |                  |    |                   |             |   |              |            |
| 0   | No                                                        |                                                                                                                                                                                                                                                             |                                                                                                                                                                                                                                                                                          |   |              |      |    |              |                  |    |                   |             |   |              |            |
| 99  | Doesn't know                                              |                                                                                                                                                                                                                                                             |                                                                                                                                                                                                                                                                                          |   |              |      |    |              |                  |    |                   |             |   |              |            |
| 88  | Refused to answer                                         |                                                                                                                                                                                                                                                             |                                                                                                                                                                                                                                                                                          |   |              |      |    |              |                  |    |                   |             |   |              |            |
| 440 | [id10234_m]<br>Show the field ONLY if:<br>[id10233_m]='1' | For how many days did she have the skin rash?<br><i>The answer could be given in another unit, but for data entry use days. Less than 1 day or 24 hours = 0 days; 1 week=7 days; 1 month=30 days. Enter "99" for "don't know." Enter "88" for "refuse."</i> | text                                                                                                                                                                                                                                                                                     |   |              |      |    |              |                  |    |                   |             |   |              |            |
| 441 | [id10235_m]<br>Show the field ONLY if:<br>[id10233_m]='1' | Where was the rash?                                                                                                                                                                                                                                         | checkbox<br><table border="1"> <tr><td>1</td><td>id10235_m__1</td><td>Face</td></tr> <tr><td>2</td><td>id10235_m__2</td><td>Trunk or abdomen</td></tr> <tr><td>3</td><td>id10235_m__3</td><td>Extremities</td></tr> <tr><td>4</td><td>id10235_m__4</td><td>Everywhere</td></tr> </table> | 1 | id10235_m__1 | Face | 2  | id10235_m__2 | Trunk or abdomen | 3  | id10235_m__3      | Extremities | 4 | id10235_m__4 | Everywhere |
| 1   | id10235_m__1                                              | Face                                                                                                                                                                                                                                                        |                                                                                                                                                                                                                                                                                          |   |              |      |    |              |                  |    |                   |             |   |              |            |
| 2   | id10235_m__2                                              | Trunk or abdomen                                                                                                                                                                                                                                            |                                                                                                                                                                                                                                                                                          |   |              |      |    |              |                  |    |                   |             |   |              |            |
| 3   | id10235_m__3                                              | Extremities                                                                                                                                                                                                                                                 |                                                                                                                                                                                                                                                                                          |   |              |      |    |              |                  |    |                   |             |   |              |            |
| 4   | id10235_m__4                                              | Everywhere                                                                                                                                                                                                                                                  |                                                                                                                                                                                                                                                                                          |   |              |      |    |              |                  |    |                   |             |   |              |            |
| 442 | [id10236_m]<br>Show the field ONLY if:<br>[id10233_m]='1' | Did she have measles rash (use local term)?                                                                                                                                                                                                                 | radio<br><table border="1"> <tr><td>1</td><td>Yes</td></tr> <tr><td>0</td><td>No</td></tr> <tr><td>99</td><td>Doesn't know</td></tr> <tr><td>88</td><td>Refused to answer</td></tr> </table>                                                                                             | 1 | Yes          | 0    | No | 99           | Doesn't know     | 88 | Refused to answer |             |   |              |            |
| 1   | Yes                                                       |                                                                                                                                                                                                                                                             |                                                                                                                                                                                                                                                                                          |   |              |      |    |              |                  |    |                   |             |   |              |            |
| 0   | No                                                        |                                                                                                                                                                                                                                                             |                                                                                                                                                                                                                                                                                          |   |              |      |    |              |                  |    |                   |             |   |              |            |
| 99  | Doesn't know                                              |                                                                                                                                                                                                                                                             |                                                                                                                                                                                                                                                                                          |   |              |      |    |              |                  |    |                   |             |   |              |            |
| 88  | Refused to answer                                         |                                                                                                                                                                                                                                                             |                                                                                                                                                                                                                                                                                          |   |              |      |    |              |                  |    |                   |             |   |              |            |
| 443 | [id10237_m]                                               | Did she ever have shingles or herpes zoster?                                                                                                                                                                                                                | radio<br><table border="1"> <tr><td>1</td><td>Yes</td></tr> <tr><td>0</td><td>No</td></tr> <tr><td>99</td><td>Doesn't know</td></tr> <tr><td>88</td><td>Refused to answer</td></tr> </table>                                                                                             | 1 | Yes          | 0    | No | 99           | Doesn't know     | 88 | Refused to answer |             |   |              |            |
| 1   | Yes                                                       |                                                                                                                                                                                                                                                             |                                                                                                                                                                                                                                                                                          |   |              |      |    |              |                  |    |                   |             |   |              |            |
| 0   | No                                                        |                                                                                                                                                                                                                                                             |                                                                                                                                                                                                                                                                                          |   |              |      |    |              |                  |    |                   |             |   |              |            |
| 99  | Doesn't know                                              |                                                                                                                                                                                                                                                             |                                                                                                                                                                                                                                                                                          |   |              |      |    |              |                  |    |                   |             |   |              |            |
| 88  | Refused to answer                                         |                                                                                                                                                                                                                                                             |                                                                                                                                                                                                                                                                                          |   |              |      |    |              |                  |    |                   |             |   |              |            |
| 444 | [id10238_m]                                               | During the illness that led to death, did her skin flake off in patches?                                                                                                                                                                                    | radio<br><table border="1"> <tr><td>1</td><td>Yes</td></tr> <tr><td>0</td><td>No</td></tr> <tr><td>99</td><td>Doesn't know</td></tr> <tr><td>88</td><td>Refused to answer</td></tr> </table>                                                                                             | 1 | Yes          | 0    | No | 99           | Doesn't know     | 88 | Refused to answer |             |   |              |            |
| 1   | Yes                                                       |                                                                                                                                                                                                                                                             |                                                                                                                                                                                                                                                                                          |   |              |      |    |              |                  |    |                   |             |   |              |            |
| 0   | No                                                        |                                                                                                                                                                                                                                                             |                                                                                                                                                                                                                                                                                          |   |              |      |    |              |                  |    |                   |             |   |              |            |
| 99  | Doesn't know                                              |                                                                                                                                                                                                                                                             |                                                                                                                                                                                                                                                                                          |   |              |      |    |              |                  |    |                   |             |   |              |            |
| 88  | Refused to answer                                         |                                                                                                                                                                                                                                                             |                                                                                                                                                                                                                                                                                          |   |              |      |    |              |                  |    |                   |             |   |              |            |
| 445 | [id10241_m]                                               | During the illness that led to death, did she bleed from anywhere?                                                                                                                                                                                          | radio<br><table border="1"> <tr><td>1</td><td>Yes</td></tr> <tr><td>0</td><td>No</td></tr> <tr><td>99</td><td>Doesn't know</td></tr> <tr><td>88</td><td>Refused to answer</td></tr> </table>                                                                                             | 1 | Yes          | 0    | No | 99           | Doesn't know     | 88 | Refused to answer |             |   |              |            |
| 1   | Yes                                                       |                                                                                                                                                                                                                                                             |                                                                                                                                                                                                                                                                                          |   |              |      |    |              |                  |    |                   |             |   |              |            |
| 0   | No                                                        |                                                                                                                                                                                                                                                             |                                                                                                                                                                                                                                                                                          |   |              |      |    |              |                  |    |                   |             |   |              |            |
| 99  | Doesn't know                                              |                                                                                                                                                                                                                                                             |                                                                                                                                                                                                                                                                                          |   |              |      |    |              |                  |    |                   |             |   |              |            |
| 88  | Refused to answer                                         |                                                                                                                                                                                                                                                             |                                                                                                                                                                                                                                                                                          |   |              |      |    |              |                  |    |                   |             |   |              |            |
| 446 | [id10242_m]<br>Show the field ONLY if:<br>[id10241_m]='1' | Did she bleed from the nose, mouth or anus?                                                                                                                                                                                                                 | radio<br><table border="1"> <tr><td>1</td><td>Yes</td></tr> <tr><td>0</td><td>No</td></tr> <tr><td>99</td><td>Doesn't know</td></tr> <tr><td>88</td><td>Refused to answer</td></tr> </table>                                                                                             | 1 | Yes          | 0    | No | 99           | Doesn't know     | 88 | Refused to answer |             |   |              |            |
| 1   | Yes                                                       |                                                                                                                                                                                                                                                             |                                                                                                                                                                                                                                                                                          |   |              |      |    |              |                  |    |                   |             |   |              |            |
| 0   | No                                                        |                                                                                                                                                                                                                                                             |                                                                                                                                                                                                                                                                                          |   |              |      |    |              |                  |    |                   |             |   |              |            |
| 99  | Doesn't know                                              |                                                                                                                                                                                                                                                             |                                                                                                                                                                                                                                                                                          |   |              |      |    |              |                  |    |                   |             |   |              |            |
| 88  | Refused to answer                                         |                                                                                                                                                                                                                                                             |                                                                                                                                                                                                                                                                                          |   |              |      |    |              |                  |    |                   |             |   |              |            |

|     |                                                           |                                                                                                      |                                                                                                                                                                                              |   |     |   |    |    |              |    |                   |
|-----|-----------------------------------------------------------|------------------------------------------------------------------------------------------------------|----------------------------------------------------------------------------------------------------------------------------------------------------------------------------------------------|---|-----|---|----|----|--------------|----|-------------------|
| 447 | [id10243_m]                                               | Did she have noticeable weight loss?                                                                 | radio<br><table border="1"> <tr><td>1</td><td>Yes</td></tr> <tr><td>0</td><td>No</td></tr> <tr><td>99</td><td>Doesn't know</td></tr> <tr><td>88</td><td>Refused to answer</td></tr> </table> | 1 | Yes | 0 | No | 99 | Doesn't know | 88 | Refused to answer |
| 1   | Yes                                                       |                                                                                                      |                                                                                                                                                                                              |   |     |   |    |    |              |    |                   |
| 0   | No                                                        |                                                                                                      |                                                                                                                                                                                              |   |     |   |    |    |              |    |                   |
| 99  | Doesn't know                                              |                                                                                                      |                                                                                                                                                                                              |   |     |   |    |    |              |    |                   |
| 88  | Refused to answer                                         |                                                                                                      |                                                                                                                                                                                              |   |     |   |    |    |              |    |                   |
| 448 | [id10244_m]                                               | Was she severely thin or wasted?                                                                     | radio<br><table border="1"> <tr><td>1</td><td>Yes</td></tr> <tr><td>0</td><td>No</td></tr> <tr><td>99</td><td>Doesn't know</td></tr> <tr><td>88</td><td>Refused to answer</td></tr> </table> | 1 | Yes | 0 | No | 99 | Doesn't know | 88 | Refused to answer |
| 1   | Yes                                                       |                                                                                                      |                                                                                                                                                                                              |   |     |   |    |    |              |    |                   |
| 0   | No                                                        |                                                                                                      |                                                                                                                                                                                              |   |     |   |    |    |              |    |                   |
| 99  | Doesn't know                                              |                                                                                                      |                                                                                                                                                                                              |   |     |   |    |    |              |    |                   |
| 88  | Refused to answer                                         |                                                                                                      |                                                                                                                                                                                              |   |     |   |    |    |              |    |                   |
| 449 | [id10245_m]                                               | During the illness that led to death, did she have a whitish rash inside the mouth or on the tongue? | radio<br><table border="1"> <tr><td>1</td><td>Yes</td></tr> <tr><td>0</td><td>No</td></tr> <tr><td>99</td><td>Doesn't know</td></tr> <tr><td>88</td><td>Refused to answer</td></tr> </table> | 1 | Yes | 0 | No | 99 | Doesn't know | 88 | Refused to answer |
| 1   | Yes                                                       |                                                                                                      |                                                                                                                                                                                              |   |     |   |    |    |              |    |                   |
| 0   | No                                                        |                                                                                                      |                                                                                                                                                                                              |   |     |   |    |    |              |    |                   |
| 99  | Doesn't know                                              |                                                                                                      |                                                                                                                                                                                              |   |     |   |    |    |              |    |                   |
| 88  | Refused to answer                                         |                                                                                                      |                                                                                                                                                                                              |   |     |   |    |    |              |    |                   |
| 450 | [id10246_m]                                               | Did she have stiffness of the whole body or was unable to open the mouth?                            | radio<br><table border="1"> <tr><td>1</td><td>Yes</td></tr> <tr><td>0</td><td>No</td></tr> <tr><td>99</td><td>Doesn't know</td></tr> <tr><td>88</td><td>Refused to answer</td></tr> </table> | 1 | Yes | 0 | No | 99 | Doesn't know | 88 | Refused to answer |
| 1   | Yes                                                       |                                                                                                      |                                                                                                                                                                                              |   |     |   |    |    |              |    |                   |
| 0   | No                                                        |                                                                                                      |                                                                                                                                                                                              |   |     |   |    |    |              |    |                   |
| 99  | Doesn't know                                              |                                                                                                      |                                                                                                                                                                                              |   |     |   |    |    |              |    |                   |
| 88  | Refused to answer                                         |                                                                                                      |                                                                                                                                                                                              |   |     |   |    |    |              |    |                   |
| 451 | [id10247_m]                                               | Did she have puffiness of the face?                                                                  | radio<br><table border="1"> <tr><td>1</td><td>Yes</td></tr> <tr><td>0</td><td>No</td></tr> <tr><td>99</td><td>Doesn't know</td></tr> <tr><td>88</td><td>Refused to answer</td></tr> </table> | 1 | Yes | 0 | No | 99 | Doesn't know | 88 | Refused to answer |
| 1   | Yes                                                       |                                                                                                      |                                                                                                                                                                                              |   |     |   |    |    |              |    |                   |
| 0   | No                                                        |                                                                                                      |                                                                                                                                                                                              |   |     |   |    |    |              |    |                   |
| 99  | Doesn't know                                              |                                                                                                      |                                                                                                                                                                                              |   |     |   |    |    |              |    |                   |
| 88  | Refused to answer                                         |                                                                                                      |                                                                                                                                                                                              |   |     |   |    |    |              |    |                   |
| 452 | [id10248_m]<br>Show the field ONLY if:<br>[id10247_m]='1' | For how many days did she have puffiness of the face?                                                | text                                                                                                                                                                                         |   |     |   |    |    |              |    |                   |
| 453 | [id10249_m]                                               | During the illness that led to death, did she have swollen legs or feet?                             | radio<br><table border="1"> <tr><td>1</td><td>Yes</td></tr> <tr><td>0</td><td>No</td></tr> <tr><td>99</td><td>Doesn't know</td></tr> <tr><td>88</td><td>Refused to answer</td></tr> </table> | 1 | Yes | 0 | No | 99 | Doesn't know | 88 | Refused to answer |
| 1   | Yes                                                       |                                                                                                      |                                                                                                                                                                                              |   |     |   |    |    |              |    |                   |
| 0   | No                                                        |                                                                                                      |                                                                                                                                                                                              |   |     |   |    |    |              |    |                   |
| 99  | Doesn't know                                              |                                                                                                      |                                                                                                                                                                                              |   |     |   |    |    |              |    |                   |
| 88  | Refused to answer                                         |                                                                                                      |                                                                                                                                                                                              |   |     |   |    |    |              |    |                   |
| 454 | [id10250_m]<br>Show the field ONLY if:<br>[id10249_m]='1' | How many days did the swelling last?                                                                 | text                                                                                                                                                                                         |   |     |   |    |    |              |    |                   |
| 455 | [id10251_m]<br>Show the field ONLY if:<br>[id10249_m]='1' | Did she have both feet swollen?                                                                      | radio<br><table border="1"> <tr><td>1</td><td>Yes</td></tr> <tr><td>0</td><td>No</td></tr> <tr><td>99</td><td>Doesn't know</td></tr> <tr><td>88</td><td>Refused to answer</td></tr> </table> | 1 | Yes | 0 | No | 99 | Doesn't know | 88 | Refused to answer |
| 1   | Yes                                                       |                                                                                                      |                                                                                                                                                                                              |   |     |   |    |    |              |    |                   |
| 0   | No                                                        |                                                                                                      |                                                                                                                                                                                              |   |     |   |    |    |              |    |                   |
| 99  | Doesn't know                                              |                                                                                                      |                                                                                                                                                                                              |   |     |   |    |    |              |    |                   |
| 88  | Refused to answer                                         |                                                                                                      |                                                                                                                                                                                              |   |     |   |    |    |              |    |                   |
| 456 | [id10252_m]                                               | Did she have general puffiness all over her body?                                                    | radio<br><table border="1"> <tr><td>1</td><td>Yes</td></tr> <tr><td>0</td><td>No</td></tr> <tr><td>99</td><td>Doesn't know</td></tr> <tr><td>88</td><td>Refused to answer</td></tr> </table> | 1 | Yes | 0 | No | 99 | Doesn't know | 88 | Refused to answer |
| 1   | Yes                                                       |                                                                                                      |                                                                                                                                                                                              |   |     |   |    |    |              |    |                   |
| 0   | No                                                        |                                                                                                      |                                                                                                                                                                                              |   |     |   |    |    |              |    |                   |
| 99  | Doesn't know                                              |                                                                                                      |                                                                                                                                                                                              |   |     |   |    |    |              |    |                   |
| 88  | Refused to answer                                         |                                                                                                      |                                                                                                                                                                                              |   |     |   |    |    |              |    |                   |

|     |                                                                                                                                         |                                                                                                                                                      |                                                                                                                                                                                                                                                                                                                                                                                                                                                                                                                                                       |   |              |            |    |              |              |    |                   |                    |   |              |                    |   |              |              |   |              |              |   |              |            |   |              |       |
|-----|-----------------------------------------------------------------------------------------------------------------------------------------|------------------------------------------------------------------------------------------------------------------------------------------------------|-------------------------------------------------------------------------------------------------------------------------------------------------------------------------------------------------------------------------------------------------------------------------------------------------------------------------------------------------------------------------------------------------------------------------------------------------------------------------------------------------------------------------------------------------------|---|--------------|------------|----|--------------|--------------|----|-------------------|--------------------|---|--------------|--------------------|---|--------------|--------------|---|--------------|--------------|---|--------------|------------|---|--------------|-------|
| 457 | [id10253_m]                                                                                                                             | Did she have any lumps?                                                                                                                              | radio<br><table border="1"> <tr><td>1</td><td>Yes</td></tr> <tr><td>0</td><td>No</td></tr> <tr><td>99</td><td>Doesn't know</td></tr> <tr><td>88</td><td>Refused to answer</td></tr> </table>                                                                                                                                                                                                                                                                                                                                                          | 1 | Yes          | 0          | No | 99           | Doesn't know | 88 | Refused to answer |                    |   |              |                    |   |              |              |   |              |              |   |              |            |   |              |       |
| 1   | Yes                                                                                                                                     |                                                                                                                                                      |                                                                                                                                                                                                                                                                                                                                                                                                                                                                                                                                                       |   |              |            |    |              |              |    |                   |                    |   |              |                    |   |              |              |   |              |              |   |              |            |   |              |       |
| 0   | No                                                                                                                                      |                                                                                                                                                      |                                                                                                                                                                                                                                                                                                                                                                                                                                                                                                                                                       |   |              |            |    |              |              |    |                   |                    |   |              |                    |   |              |              |   |              |              |   |              |            |   |              |       |
| 99  | Doesn't know                                                                                                                            |                                                                                                                                                      |                                                                                                                                                                                                                                                                                                                                                                                                                                                                                                                                                       |   |              |            |    |              |              |    |                   |                    |   |              |                    |   |              |              |   |              |              |   |              |            |   |              |       |
| 88  | Refused to answer                                                                                                                       |                                                                                                                                                      |                                                                                                                                                                                                                                                                                                                                                                                                                                                                                                                                                       |   |              |            |    |              |              |    |                   |                    |   |              |                    |   |              |              |   |              |              |   |              |            |   |              |       |
| 458 | [id10254_m]<br>Show the field ONLY if:<br>[id10253_m]='1'                                                                               | Did she have any lumps or lesions in the mouth?                                                                                                      | radio<br><table border="1"> <tr><td>1</td><td>Yes</td></tr> <tr><td>0</td><td>No</td></tr> <tr><td>99</td><td>Doesn't know</td></tr> <tr><td>88</td><td>Refused to answer</td></tr> </table>                                                                                                                                                                                                                                                                                                                                                          | 1 | Yes          | 0          | No | 99           | Doesn't know | 88 | Refused to answer |                    |   |              |                    |   |              |              |   |              |              |   |              |            |   |              |       |
| 1   | Yes                                                                                                                                     |                                                                                                                                                      |                                                                                                                                                                                                                                                                                                                                                                                                                                                                                                                                                       |   |              |            |    |              |              |    |                   |                    |   |              |                    |   |              |              |   |              |              |   |              |            |   |              |       |
| 0   | No                                                                                                                                      |                                                                                                                                                      |                                                                                                                                                                                                                                                                                                                                                                                                                                                                                                                                                       |   |              |            |    |              |              |    |                   |                    |   |              |                    |   |              |              |   |              |              |   |              |            |   |              |       |
| 99  | Doesn't know                                                                                                                            |                                                                                                                                                      |                                                                                                                                                                                                                                                                                                                                                                                                                                                                                                                                                       |   |              |            |    |              |              |    |                   |                    |   |              |                    |   |              |              |   |              |              |   |              |            |   |              |       |
| 88  | Refused to answer                                                                                                                       |                                                                                                                                                      |                                                                                                                                                                                                                                                                                                                                                                                                                                                                                                                                                       |   |              |            |    |              |              |    |                   |                    |   |              |                    |   |              |              |   |              |              |   |              |            |   |              |       |
| 459 | [id10255_m]<br>Show the field ONLY if:<br>[id10253_m]='1'                                                                               | Did she have any lumps on the neck?                                                                                                                  | radio<br><table border="1"> <tr><td>1</td><td>Yes</td></tr> <tr><td>0</td><td>No</td></tr> <tr><td>99</td><td>Doesn't know</td></tr> <tr><td>88</td><td>Refused to answer</td></tr> </table>                                                                                                                                                                                                                                                                                                                                                          | 1 | Yes          | 0          | No | 99           | Doesn't know | 88 | Refused to answer |                    |   |              |                    |   |              |              |   |              |              |   |              |            |   |              |       |
| 1   | Yes                                                                                                                                     |                                                                                                                                                      |                                                                                                                                                                                                                                                                                                                                                                                                                                                                                                                                                       |   |              |            |    |              |              |    |                   |                    |   |              |                    |   |              |              |   |              |              |   |              |            |   |              |       |
| 0   | No                                                                                                                                      |                                                                                                                                                      |                                                                                                                                                                                                                                                                                                                                                                                                                                                                                                                                                       |   |              |            |    |              |              |    |                   |                    |   |              |                    |   |              |              |   |              |              |   |              |            |   |              |       |
| 99  | Doesn't know                                                                                                                            |                                                                                                                                                      |                                                                                                                                                                                                                                                                                                                                                                                                                                                                                                                                                       |   |              |            |    |              |              |    |                   |                    |   |              |                    |   |              |              |   |              |              |   |              |            |   |              |       |
| 88  | Refused to answer                                                                                                                       |                                                                                                                                                      |                                                                                                                                                                                                                                                                                                                                                                                                                                                                                                                                                       |   |              |            |    |              |              |    |                   |                    |   |              |                    |   |              |              |   |              |              |   |              |            |   |              |       |
| 460 | [id10256_m]<br>Show the field ONLY if:<br>[id10253_m]='1'                                                                               | Did she have any lumps on the armpit?                                                                                                                | radio<br><table border="1"> <tr><td>1</td><td>Yes</td></tr> <tr><td>0</td><td>No</td></tr> <tr><td>99</td><td>Doesn't know</td></tr> <tr><td>88</td><td>Refused to answer</td></tr> </table>                                                                                                                                                                                                                                                                                                                                                          | 1 | Yes          | 0          | No | 99           | Doesn't know | 88 | Refused to answer |                    |   |              |                    |   |              |              |   |              |              |   |              |            |   |              |       |
| 1   | Yes                                                                                                                                     |                                                                                                                                                      |                                                                                                                                                                                                                                                                                                                                                                                                                                                                                                                                                       |   |              |            |    |              |              |    |                   |                    |   |              |                    |   |              |              |   |              |              |   |              |            |   |              |       |
| 0   | No                                                                                                                                      |                                                                                                                                                      |                                                                                                                                                                                                                                                                                                                                                                                                                                                                                                                                                       |   |              |            |    |              |              |    |                   |                    |   |              |                    |   |              |              |   |              |              |   |              |            |   |              |       |
| 99  | Doesn't know                                                                                                                            |                                                                                                                                                      |                                                                                                                                                                                                                                                                                                                                                                                                                                                                                                                                                       |   |              |            |    |              |              |    |                   |                    |   |              |                    |   |              |              |   |              |              |   |              |            |   |              |       |
| 88  | Refused to answer                                                                                                                       |                                                                                                                                                      |                                                                                                                                                                                                                                                                                                                                                                                                                                                                                                                                                       |   |              |            |    |              |              |    |                   |                    |   |              |                    |   |              |              |   |              |              |   |              |            |   |              |       |
| 461 | [id10257_m]<br>Show the field ONLY if:<br>[id10253_m]='1'                                                                               | Did she have any lumps on the groin?                                                                                                                 | radio<br><table border="1"> <tr><td>1</td><td>Yes</td></tr> <tr><td>0</td><td>No</td></tr> <tr><td>99</td><td>Doesn't know</td></tr> <tr><td>88</td><td>Refused to answer</td></tr> </table>                                                                                                                                                                                                                                                                                                                                                          | 1 | Yes          | 0          | No | 99           | Doesn't know | 88 | Refused to answer |                    |   |              |                    |   |              |              |   |              |              |   |              |            |   |              |       |
| 1   | Yes                                                                                                                                     |                                                                                                                                                      |                                                                                                                                                                                                                                                                                                                                                                                                                                                                                                                                                       |   |              |            |    |              |              |    |                   |                    |   |              |                    |   |              |              |   |              |              |   |              |            |   |              |       |
| 0   | No                                                                                                                                      |                                                                                                                                                      |                                                                                                                                                                                                                                                                                                                                                                                                                                                                                                                                                       |   |              |            |    |              |              |    |                   |                    |   |              |                    |   |              |              |   |              |              |   |              |            |   |              |       |
| 99  | Doesn't know                                                                                                                            |                                                                                                                                                      |                                                                                                                                                                                                                                                                                                                                                                                                                                                                                                                                                       |   |              |            |    |              |              |    |                   |                    |   |              |                    |   |              |              |   |              |              |   |              |            |   |              |       |
| 88  | Refused to answer                                                                                                                       |                                                                                                                                                      |                                                                                                                                                                                                                                                                                                                                                                                                                                                                                                                                                       |   |              |            |    |              |              |    |                   |                    |   |              |                    |   |              |              |   |              |              |   |              |            |   |              |       |
| 462 | [id10258_m]                                                                                                                             | Was she in any way paralysed?                                                                                                                        | radio<br><table border="1"> <tr><td>1</td><td>Yes</td></tr> <tr><td>0</td><td>No</td></tr> <tr><td>99</td><td>Doesn't know</td></tr> <tr><td>88</td><td>Refused to answer</td></tr> </table>                                                                                                                                                                                                                                                                                                                                                          | 1 | Yes          | 0          | No | 99           | Doesn't know | 88 | Refused to answer |                    |   |              |                    |   |              |              |   |              |              |   |              |            |   |              |       |
| 1   | Yes                                                                                                                                     |                                                                                                                                                      |                                                                                                                                                                                                                                                                                                                                                                                                                                                                                                                                                       |   |              |            |    |              |              |    |                   |                    |   |              |                    |   |              |              |   |              |              |   |              |            |   |              |       |
| 0   | No                                                                                                                                      |                                                                                                                                                      |                                                                                                                                                                                                                                                                                                                                                                                                                                                                                                                                                       |   |              |            |    |              |              |    |                   |                    |   |              |                    |   |              |              |   |              |              |   |              |            |   |              |       |
| 99  | Doesn't know                                                                                                                            |                                                                                                                                                      |                                                                                                                                                                                                                                                                                                                                                                                                                                                                                                                                                       |   |              |            |    |              |              |    |                   |                    |   |              |                    |   |              |              |   |              |              |   |              |            |   |              |       |
| 88  | Refused to answer                                                                                                                       |                                                                                                                                                      |                                                                                                                                                                                                                                                                                                                                                                                                                                                                                                                                                       |   |              |            |    |              |              |    |                   |                    |   |              |                    |   |              |              |   |              |              |   |              |            |   |              |       |
| 463 | [id10259_m]<br>Show the field ONLY if:<br>[id10258_m]='1'                                                                               | Did she have paralysis of only one side of the body?                                                                                                 | radio<br><table border="1"> <tr><td>1</td><td>Yes</td></tr> <tr><td>0</td><td>No</td></tr> <tr><td>99</td><td>Doesn't know</td></tr> <tr><td>88</td><td>Refused to answer</td></tr> </table>                                                                                                                                                                                                                                                                                                                                                          | 1 | Yes          | 0          | No | 99           | Doesn't know | 88 | Refused to answer |                    |   |              |                    |   |              |              |   |              |              |   |              |            |   |              |       |
| 1   | Yes                                                                                                                                     |                                                                                                                                                      |                                                                                                                                                                                                                                                                                                                                                                                                                                                                                                                                                       |   |              |            |    |              |              |    |                   |                    |   |              |                    |   |              |              |   |              |              |   |              |            |   |              |       |
| 0   | No                                                                                                                                      |                                                                                                                                                      |                                                                                                                                                                                                                                                                                                                                                                                                                                                                                                                                                       |   |              |            |    |              |              |    |                   |                    |   |              |                    |   |              |              |   |              |              |   |              |            |   |              |       |
| 99  | Doesn't know                                                                                                                            |                                                                                                                                                      |                                                                                                                                                                                                                                                                                                                                                                                                                                                                                                                                                       |   |              |            |    |              |              |    |                   |                    |   |              |                    |   |              |              |   |              |              |   |              |            |   |              |       |
| 88  | Refused to answer                                                                                                                       |                                                                                                                                                      |                                                                                                                                                                                                                                                                                                                                                                                                                                                                                                                                                       |   |              |            |    |              |              |    |                   |                    |   |              |                    |   |              |              |   |              |              |   |              |            |   |              |       |
| 464 | [id10260_m]<br>Show the field ONLY if:<br>[id10258_m]='1'                                                                               | Which were the limbs or body parts paralysed?                                                                                                        | checkbox<br><table border="1"> <tr><td>1</td><td>id10260_m__1</td><td>Right side</td></tr> <tr><td>2</td><td>id10260_m__2</td><td>Left side</td></tr> <tr><td>3</td><td>id10260_m__3</td><td>Lower part of body</td></tr> <tr><td>4</td><td>id10260_m__4</td><td>Upper part of body</td></tr> <tr><td>5</td><td>id10260_m__5</td><td>One leg only</td></tr> <tr><td>6</td><td>id10260_m__6</td><td>One arm only</td></tr> <tr><td>7</td><td>id10260_m__7</td><td>Whole body</td></tr> <tr><td>8</td><td>id10260_m__8</td><td>Other</td></tr> </table> | 1 | id10260_m__1 | Right side | 2  | id10260_m__2 | Left side    | 3  | id10260_m__3      | Lower part of body | 4 | id10260_m__4 | Upper part of body | 5 | id10260_m__5 | One leg only | 6 | id10260_m__6 | One arm only | 7 | id10260_m__7 | Whole body | 8 | id10260_m__8 | Other |
| 1   | id10260_m__1                                                                                                                            | Right side                                                                                                                                           |                                                                                                                                                                                                                                                                                                                                                                                                                                                                                                                                                       |   |              |            |    |              |              |    |                   |                    |   |              |                    |   |              |              |   |              |              |   |              |            |   |              |       |
| 2   | id10260_m__2                                                                                                                            | Left side                                                                                                                                            |                                                                                                                                                                                                                                                                                                                                                                                                                                                                                                                                                       |   |              |            |    |              |              |    |                   |                    |   |              |                    |   |              |              |   |              |              |   |              |            |   |              |       |
| 3   | id10260_m__3                                                                                                                            | Lower part of body                                                                                                                                   |                                                                                                                                                                                                                                                                                                                                                                                                                                                                                                                                                       |   |              |            |    |              |              |    |                   |                    |   |              |                    |   |              |              |   |              |              |   |              |            |   |              |       |
| 4   | id10260_m__4                                                                                                                            | Upper part of body                                                                                                                                   |                                                                                                                                                                                                                                                                                                                                                                                                                                                                                                                                                       |   |              |            |    |              |              |    |                   |                    |   |              |                    |   |              |              |   |              |              |   |              |            |   |              |       |
| 5   | id10260_m__5                                                                                                                            | One leg only                                                                                                                                         |                                                                                                                                                                                                                                                                                                                                                                                                                                                                                                                                                       |   |              |            |    |              |              |    |                   |                    |   |              |                    |   |              |              |   |              |              |   |              |            |   |              |       |
| 6   | id10260_m__6                                                                                                                            | One arm only                                                                                                                                         |                                                                                                                                                                                                                                                                                                                                                                                                                                                                                                                                                       |   |              |            |    |              |              |    |                   |                    |   |              |                    |   |              |              |   |              |              |   |              |            |   |              |       |
| 7   | id10260_m__7                                                                                                                            | Whole body                                                                                                                                           |                                                                                                                                                                                                                                                                                                                                                                                                                                                                                                                                                       |   |              |            |    |              |              |    |                   |                    |   |              |                    |   |              |              |   |              |              |   |              |            |   |              |       |
| 8   | id10260_m__8                                                                                                                            | Other                                                                                                                                                |                                                                                                                                                                                                                                                                                                                                                                                                                                                                                                                                                       |   |              |            |    |              |              |    |                   |                    |   |              |                    |   |              |              |   |              |              |   |              |            |   |              |       |
| 465 | [id10260_check_m]<br>Show the field ONLY if:<br>[id10259_m]='1' and (([id10260_m(1)]='1' and [id10260_m(2)]='1') or [id10260_m(7)]='1') | It is not possible to select "only one side paralysed" and "left and right side" or "whole body" together. Please go back and correct the selection. | descriptive                                                                                                                                                                                                                                                                                                                                                                                                                                                                                                                                           |   |              |            |    |              |              |    |                   |                    |   |              |                    |   |              |              |   |              |              |   |              |            |   |              |       |



|     |                                                           |                                                                                                                                                                                                                                                                            |                                                                                                                                                                                                                                       |   |        |   |         |    |              |    |                   |    |                   |
|-----|-----------------------------------------------------------|----------------------------------------------------------------------------------------------------------------------------------------------------------------------------------------------------------------------------------------------------------------------------|---------------------------------------------------------------------------------------------------------------------------------------------------------------------------------------------------------------------------------------|---|--------|---|---------|----|--------------|----|-------------------|----|-------------------|
| 466 | [id10261_m]                                               | Did she have difficulty swallowing?                                                                                                                                                                                                                                        | radio<br><table border="1"> <tr><td>1</td><td>Yes</td></tr> <tr><td>0</td><td>No</td></tr> <tr><td>99</td><td>Doesn't know</td></tr> <tr><td>88</td><td>Refused to answer</td></tr> </table>                                          | 1 | Yes    | 0 | No      | 99 | Doesn't know | 88 | Refused to answer |    |                   |
| 1   | Yes                                                       |                                                                                                                                                                                                                                                                            |                                                                                                                                                                                                                                       |   |        |   |         |    |              |    |                   |    |                   |
| 0   | No                                                        |                                                                                                                                                                                                                                                                            |                                                                                                                                                                                                                                       |   |        |   |         |    |              |    |                   |    |                   |
| 99  | Doesn't know                                              |                                                                                                                                                                                                                                                                            |                                                                                                                                                                                                                                       |   |        |   |         |    |              |    |                   |    |                   |
| 88  | Refused to answer                                         |                                                                                                                                                                                                                                                                            |                                                                                                                                                                                                                                       |   |        |   |         |    |              |    |                   |    |                   |
| 467 | [id10262_m]<br>Show the field ONLY if:<br>[id10261_m]='1' | For how many days before death did she have difficulty swallowing?                                                                                                                                                                                                         | text                                                                                                                                                                                                                                  |   |        |   |         |    |              |    |                   |    |                   |
| 468 | [id10263_m]<br>Show the field ONLY if:<br>[id10261_m]='1' | Was the difficulty with swallowing with solids, liquids, or both?                                                                                                                                                                                                          | radio<br><table border="1"> <tr><td>1</td><td>Solids</td></tr> <tr><td>2</td><td>Liquids</td></tr> <tr><td>3</td><td>Both</td></tr> <tr><td>99</td><td>Doesn't know</td></tr> <tr><td>88</td><td>Refused to answer</td></tr> </table> | 1 | Solids | 2 | Liquids | 3  | Both         | 99 | Doesn't know      | 88 | Refused to answer |
| 1   | Solids                                                    |                                                                                                                                                                                                                                                                            |                                                                                                                                                                                                                                       |   |        |   |         |    |              |    |                   |    |                   |
| 2   | Liquids                                                   |                                                                                                                                                                                                                                                                            |                                                                                                                                                                                                                                       |   |        |   |         |    |              |    |                   |    |                   |
| 3   | Both                                                      |                                                                                                                                                                                                                                                                            |                                                                                                                                                                                                                                       |   |        |   |         |    |              |    |                   |    |                   |
| 99  | Doesn't know                                              |                                                                                                                                                                                                                                                                            |                                                                                                                                                                                                                                       |   |        |   |         |    |              |    |                   |    |                   |
| 88  | Refused to answer                                         |                                                                                                                                                                                                                                                                            |                                                                                                                                                                                                                                       |   |        |   |         |    |              |    |                   |    |                   |
| 469 | [id10264_m]                                               | Did she have pain upon swallowing?                                                                                                                                                                                                                                         | radio<br><table border="1"> <tr><td>1</td><td>Yes</td></tr> <tr><td>0</td><td>No</td></tr> <tr><td>99</td><td>Doesn't know</td></tr> <tr><td>88</td><td>Refused to answer</td></tr> </table>                                          | 1 | Yes    | 0 | No      | 99 | Doesn't know | 88 | Refused to answer |    |                   |
| 1   | Yes                                                       |                                                                                                                                                                                                                                                                            |                                                                                                                                                                                                                                       |   |        |   |         |    |              |    |                   |    |                   |
| 0   | No                                                        |                                                                                                                                                                                                                                                                            |                                                                                                                                                                                                                                       |   |        |   |         |    |              |    |                   |    |                   |
| 99  | Doesn't know                                              |                                                                                                                                                                                                                                                                            |                                                                                                                                                                                                                                       |   |        |   |         |    |              |    |                   |    |                   |
| 88  | Refused to answer                                         |                                                                                                                                                                                                                                                                            |                                                                                                                                                                                                                                       |   |        |   |         |    |              |    |                   |    |                   |
| 470 | [id10265_m]                                               | Did she have yellow discoloration of the eyes?                                                                                                                                                                                                                             | radio<br><table border="1"> <tr><td>1</td><td>Yes</td></tr> <tr><td>0</td><td>No</td></tr> <tr><td>99</td><td>Doesn't know</td></tr> <tr><td>88</td><td>Refused to answer</td></tr> </table>                                          | 1 | Yes    | 0 | No      | 99 | Doesn't know | 88 | Refused to answer |    |                   |
| 1   | Yes                                                       |                                                                                                                                                                                                                                                                            |                                                                                                                                                                                                                                       |   |        |   |         |    |              |    |                   |    |                   |
| 0   | No                                                        |                                                                                                                                                                                                                                                                            |                                                                                                                                                                                                                                       |   |        |   |         |    |              |    |                   |    |                   |
| 99  | Doesn't know                                              |                                                                                                                                                                                                                                                                            |                                                                                                                                                                                                                                       |   |        |   |         |    |              |    |                   |    |                   |
| 88  | Refused to answer                                         |                                                                                                                                                                                                                                                                            |                                                                                                                                                                                                                                       |   |        |   |         |    |              |    |                   |    |                   |
| 471 | [id10266_m]<br>Show the field ONLY if:<br>[id10265_m]='1' | For how many days did she have the yellow discoloration?                                                                                                                                                                                                                   | text                                                                                                                                                                                                                                  |   |        |   |         |    |              |    |                   |    |                   |
| 472 | [id10267_m]                                               | Did her hair change in color to a reddish or yellowish color?                                                                                                                                                                                                              | radio<br><table border="1"> <tr><td>1</td><td>Yes</td></tr> <tr><td>0</td><td>No</td></tr> <tr><td>99</td><td>Doesn't know</td></tr> <tr><td>88</td><td>Refused to answer</td></tr> </table>                                          | 1 | Yes    | 0 | No      | 99 | Doesn't know | 88 | Refused to answer |    |                   |
| 1   | Yes                                                       |                                                                                                                                                                                                                                                                            |                                                                                                                                                                                                                                       |   |        |   |         |    |              |    |                   |    |                   |
| 0   | No                                                        |                                                                                                                                                                                                                                                                            |                                                                                                                                                                                                                                       |   |        |   |         |    |              |    |                   |    |                   |
| 99  | Doesn't know                                              |                                                                                                                                                                                                                                                                            |                                                                                                                                                                                                                                       |   |        |   |         |    |              |    |                   |    |                   |
| 88  | Refused to answer                                         |                                                                                                                                                                                                                                                                            |                                                                                                                                                                                                                                       |   |        |   |         |    |              |    |                   |    |                   |
| 473 | [id10268_m]                                               | Did she look pale (thinning/lack of blood) or have pale palms, eyes or nail beds?<br><i>Long term deficiency of the blood results in a pale, whitish appearance of the lips, tongue, and eye sac. Sometimes it is referred to as thinning or lack of blood, or pallor.</i> | radio<br><table border="1"> <tr><td>1</td><td>Yes</td></tr> <tr><td>0</td><td>No</td></tr> <tr><td>99</td><td>Doesn't know</td></tr> <tr><td>88</td><td>Refused to answer</td></tr> </table>                                          | 1 | Yes    | 0 | No      | 99 | Doesn't know | 88 | Refused to answer |    |                   |
| 1   | Yes                                                       |                                                                                                                                                                                                                                                                            |                                                                                                                                                                                                                                       |   |        |   |         |    |              |    |                   |    |                   |
| 0   | No                                                        |                                                                                                                                                                                                                                                                            |                                                                                                                                                                                                                                       |   |        |   |         |    |              |    |                   |    |                   |
| 99  | Doesn't know                                              |                                                                                                                                                                                                                                                                            |                                                                                                                                                                                                                                       |   |        |   |         |    |              |    |                   |    |                   |
| 88  | Refused to answer                                         |                                                                                                                                                                                                                                                                            |                                                                                                                                                                                                                                       |   |        |   |         |    |              |    |                   |    |                   |
| 474 | [id10270_m]                                               | Did she drink a lot more water than usual?                                                                                                                                                                                                                                 | radio<br><table border="1"> <tr><td>1</td><td>Yes</td></tr> <tr><td>0</td><td>No</td></tr> <tr><td>99</td><td>Doesn't know</td></tr> <tr><td>88</td><td>Refused to answer</td></tr> </table>                                          | 1 | Yes    | 0 | No      | 99 | Doesn't know | 88 | Refused to answer |    |                   |
| 1   | Yes                                                       |                                                                                                                                                                                                                                                                            |                                                                                                                                                                                                                                       |   |        |   |         |    |              |    |                   |    |                   |
| 0   | No                                                        |                                                                                                                                                                                                                                                                            |                                                                                                                                                                                                                                       |   |        |   |         |    |              |    |                   |    |                   |
| 99  | Doesn't know                                              |                                                                                                                                                                                                                                                                            |                                                                                                                                                                                                                                       |   |        |   |         |    |              |    |                   |    |                   |
| 88  | Refused to answer                                         |                                                                                                                                                                                                                                                                            |                                                                                                                                                                                                                                       |   |        |   |         |    |              |    |                   |    |                   |
| 475 | [id10486_m]                                               | Did she suffer from extreme fatigue?                                                                                                                                                                                                                                       | radio<br><table border="1"> <tr><td>1</td><td>Yes</td></tr> <tr><td>0</td><td>No</td></tr> <tr><td>99</td><td>Doesn't know</td></tr> <tr><td>88</td><td>Refused to answer</td></tr> </table>                                          | 1 | Yes    | 0 | No      | 99 | Doesn't know | 88 | Refused to answer |    |                   |
| 1   | Yes                                                       |                                                                                                                                                                                                                                                                            |                                                                                                                                                                                                                                       |   |        |   |         |    |              |    |                   |    |                   |
| 0   | No                                                        |                                                                                                                                                                                                                                                                            |                                                                                                                                                                                                                                       |   |        |   |         |    |              |    |                   |    |                   |
| 99  | Doesn't know                                              |                                                                                                                                                                                                                                                                            |                                                                                                                                                                                                                                       |   |        |   |         |    |              |    |                   |    |                   |
| 88  | Refused to answer                                         |                                                                                                                                                                                                                                                                            |                                                                                                                                                                                                                                       |   |        |   |         |    |              |    |                   |    |                   |

|     |                                                                                                   |                                                                                                                                                                                                                                                                        |                                                                                                                                                                                              |   |     |   |    |    |              |    |                   |
|-----|---------------------------------------------------------------------------------------------------|------------------------------------------------------------------------------------------------------------------------------------------------------------------------------------------------------------------------------------------------------------------------|----------------------------------------------------------------------------------------------------------------------------------------------------------------------------------------------|---|-----|---|----|----|--------------|----|-------------------|
| 476 | [id10485_m]                                                                                       | Did she experience a new loss, change or decreased sense of smell or taste?                                                                                                                                                                                            | radio<br><table border="1"> <tr><td>1</td><td>Yes</td></tr> <tr><td>0</td><td>No</td></tr> <tr><td>99</td><td>Doesn't know</td></tr> <tr><td>88</td><td>Refused to answer</td></tr> </table> | 1 | Yes | 0 | No | 99 | Doesn't know | 88 | Refused to answer |
| 1   | Yes                                                                                               |                                                                                                                                                                                                                                                                        |                                                                                                                                                                                              |   |     |   |    |    |              |    |                   |
| 0   | No                                                                                                |                                                                                                                                                                                                                                                                        |                                                                                                                                                                                              |   |     |   |    |    |              |    |                   |
| 99  | Doesn't know                                                                                      |                                                                                                                                                                                                                                                                        |                                                                                                                                                                                              |   |     |   |    |    |              |    |                   |
| 88  | Refused to answer                                                                                 |                                                                                                                                                                                                                                                                        |                                                                                                                                                                                              |   |     |   |    |    |              |    |                   |
| 477 | [id10294_m]                                                                                       | Section Header: <i>Signs and Symptoms Associated with Pregnancy and Women</i><br>Did she have any swelling or lump in the breast?                                                                                                                                      | radio<br><table border="1"> <tr><td>1</td><td>Yes</td></tr> <tr><td>0</td><td>No</td></tr> <tr><td>99</td><td>Doesn't know</td></tr> <tr><td>88</td><td>Refused to answer</td></tr> </table> | 1 | Yes | 0 | No | 99 | Doesn't know | 88 | Refused to answer |
| 1   | Yes                                                                                               |                                                                                                                                                                                                                                                                        |                                                                                                                                                                                              |   |     |   |    |    |              |    |                   |
| 0   | No                                                                                                |                                                                                                                                                                                                                                                                        |                                                                                                                                                                                              |   |     |   |    |    |              |    |                   |
| 99  | Doesn't know                                                                                      |                                                                                                                                                                                                                                                                        |                                                                                                                                                                                              |   |     |   |    |    |              |    |                   |
| 88  | Refused to answer                                                                                 |                                                                                                                                                                                                                                                                        |                                                                                                                                                                                              |   |     |   |    |    |              |    |                   |
| 478 | [id10295_m]                                                                                       | Did she have any ulcers (pits) in the breast?                                                                                                                                                                                                                          | radio<br><table border="1"> <tr><td>1</td><td>Yes</td></tr> <tr><td>0</td><td>No</td></tr> <tr><td>99</td><td>Doesn't know</td></tr> <tr><td>88</td><td>Refused to answer</td></tr> </table> | 1 | Yes | 0 | No | 99 | Doesn't know | 88 | Refused to answer |
| 1   | Yes                                                                                               |                                                                                                                                                                                                                                                                        |                                                                                                                                                                                              |   |     |   |    |    |              |    |                   |
| 0   | No                                                                                                |                                                                                                                                                                                                                                                                        |                                                                                                                                                                                              |   |     |   |    |    |              |    |                   |
| 99  | Doesn't know                                                                                      |                                                                                                                                                                                                                                                                        |                                                                                                                                                                                              |   |     |   |    |    |              |    |                   |
| 88  | Refused to answer                                                                                 |                                                                                                                                                                                                                                                                        |                                                                                                                                                                                              |   |     |   |    |    |              |    |                   |
| 479 | [id10296_m]                                                                                       | Did she ever have a period or menstruate?<br><i>Ask for period and menstruation, and also mention the content of the subquestions already (excessive quantity or little quantity of bleeding, or irregular vaginal bleeding). If anything is mentioned select yes.</i> | radio<br><table border="1"> <tr><td>1</td><td>Yes</td></tr> <tr><td>0</td><td>No</td></tr> <tr><td>99</td><td>Doesn't know</td></tr> <tr><td>88</td><td>Refused to answer</td></tr> </table> | 1 | Yes | 0 | No | 99 | Doesn't know | 88 | Refused to answer |
| 1   | Yes                                                                                               |                                                                                                                                                                                                                                                                        |                                                                                                                                                                                              |   |     |   |    |    |              |    |                   |
| 0   | No                                                                                                |                                                                                                                                                                                                                                                                        |                                                                                                                                                                                              |   |     |   |    |    |              |    |                   |
| 99  | Doesn't know                                                                                      |                                                                                                                                                                                                                                                                        |                                                                                                                                                                                              |   |     |   |    |    |              |    |                   |
| 88  | Refused to answer                                                                                 |                                                                                                                                                                                                                                                                        |                                                                                                                                                                                              |   |     |   |    |    |              |    |                   |
| 480 | [id10297_m]<br>Show the field ONLY if:<br>[id10296_m]='1'                                         | When she had her period, did she have vaginal bleeding in between menstrual periods?<br><i>Important is the excessive quantity of blood.</i>                                                                                                                           | radio<br><table border="1"> <tr><td>1</td><td>Yes</td></tr> <tr><td>0</td><td>No</td></tr> <tr><td>99</td><td>Doesn't know</td></tr> <tr><td>88</td><td>Refused to answer</td></tr> </table> | 1 | Yes | 0 | No | 99 | Doesn't know | 88 | Refused to answer |
| 1   | Yes                                                                                               |                                                                                                                                                                                                                                                                        |                                                                                                                                                                                              |   |     |   |    |    |              |    |                   |
| 0   | No                                                                                                |                                                                                                                                                                                                                                                                        |                                                                                                                                                                                              |   |     |   |    |    |              |    |                   |
| 99  | Doesn't know                                                                                      |                                                                                                                                                                                                                                                                        |                                                                                                                                                                                              |   |     |   |    |    |              |    |                   |
| 88  | Refused to answer                                                                                 |                                                                                                                                                                                                                                                                        |                                                                                                                                                                                              |   |     |   |    |    |              |    |                   |
| 481 | [id10298_m]<br>Show the field ONLY if:<br>[id10297_m]='1'                                         | Was the bleeding excessive?                                                                                                                                                                                                                                            | radio<br><table border="1"> <tr><td>1</td><td>Yes</td></tr> <tr><td>0</td><td>No</td></tr> <tr><td>99</td><td>Doesn't know</td></tr> <tr><td>88</td><td>Refused to answer</td></tr> </table> | 1 | Yes | 0 | No | 99 | Doesn't know | 88 | Refused to answer |
| 1   | Yes                                                                                               |                                                                                                                                                                                                                                                                        |                                                                                                                                                                                              |   |     |   |    |    |              |    |                   |
| 0   | No                                                                                                |                                                                                                                                                                                                                                                                        |                                                                                                                                                                                              |   |     |   |    |    |              |    |                   |
| 99  | Doesn't know                                                                                      |                                                                                                                                                                                                                                                                        |                                                                                                                                                                                              |   |     |   |    |    |              |    |                   |
| 88  | Refused to answer                                                                                 |                                                                                                                                                                                                                                                                        |                                                                                                                                                                                              |   |     |   |    |    |              |    |                   |
| 482 | [id10301_m]<br>Show the field ONLY if:<br>[id10296_m]='1'                                         | Was there excessive vaginal bleeding in the week prior to death?<br><i>Important is the excessive quantity of blood.</i>                                                                                                                                               | radio<br><table border="1"> <tr><td>1</td><td>Yes</td></tr> <tr><td>0</td><td>No</td></tr> <tr><td>99</td><td>Doesn't know</td></tr> <tr><td>88</td><td>Refused to answer</td></tr> </table> | 1 | Yes | 0 | No | 99 | Doesn't know | 88 | Refused to answer |
| 1   | Yes                                                                                               |                                                                                                                                                                                                                                                                        |                                                                                                                                                                                              |   |     |   |    |    |              |    |                   |
| 0   | No                                                                                                |                                                                                                                                                                                                                                                                        |                                                                                                                                                                                              |   |     |   |    |    |              |    |                   |
| 99  | Doesn't know                                                                                      |                                                                                                                                                                                                                                                                        |                                                                                                                                                                                              |   |     |   |    |    |              |    |                   |
| 88  | Refused to answer                                                                                 |                                                                                                                                                                                                                                                                        |                                                                                                                                                                                              |   |     |   |    |    |              |    |                   |
| 483 | [id10299_m]<br>Show the field ONLY if:<br>[id10296_m]='1'                                         | Did her menstrual period stop naturally because of menopause or removal of uterus?                                                                                                                                                                                     | radio<br><table border="1"> <tr><td>1</td><td>Yes</td></tr> <tr><td>0</td><td>No</td></tr> <tr><td>99</td><td>Doesn't know</td></tr> <tr><td>88</td><td>Refused to answer</td></tr> </table> | 1 | Yes | 0 | No | 99 | Doesn't know | 88 | Refused to answer |
| 1   | Yes                                                                                               |                                                                                                                                                                                                                                                                        |                                                                                                                                                                                              |   |     |   |    |    |              |    |                   |
| 0   | No                                                                                                |                                                                                                                                                                                                                                                                        |                                                                                                                                                                                              |   |     |   |    |    |              |    |                   |
| 99  | Doesn't know                                                                                      |                                                                                                                                                                                                                                                                        |                                                                                                                                                                                              |   |     |   |    |    |              |    |                   |
| 88  | Refused to answer                                                                                 |                                                                                                                                                                                                                                                                        |                                                                                                                                                                                              |   |     |   |    |    |              |    |                   |
| 484 | [id10302_m]<br>Show the field ONLY if:<br>[id10299_m]='0' or [id10299_m]='99' or [id10299_m]='88' | At the time of death was her period overdue?                                                                                                                                                                                                                           | radio<br><table border="1"> <tr><td>1</td><td>Yes</td></tr> <tr><td>0</td><td>No</td></tr> <tr><td>99</td><td>Doesn't know</td></tr> <tr><td>88</td><td>Refused to answer</td></tr> </table> | 1 | Yes | 0 | No | 99 | Doesn't know | 88 | Refused to answer |
| 1   | Yes                                                                                               |                                                                                                                                                                                                                                                                        |                                                                                                                                                                                              |   |     |   |    |    |              |    |                   |
| 0   | No                                                                                                |                                                                                                                                                                                                                                                                        |                                                                                                                                                                                              |   |     |   |    |    |              |    |                   |
| 99  | Doesn't know                                                                                      |                                                                                                                                                                                                                                                                        |                                                                                                                                                                                              |   |     |   |    |    |              |    |                   |
| 88  | Refused to answer                                                                                 |                                                                                                                                                                                                                                                                        |                                                                                                                                                                                              |   |     |   |    |    |              |    |                   |
| 485 | [id10303_m]<br>Show the field ONLY if:<br>[id10302_m]='1'                                         | For how many weeks had her period been overdue?<br><i>The answer could be given in another unit, but for data entry use weeks. Less than 1 week=0. 7 days=1 week. Enter "99" for "don't know." Enter "88" for "refuse."</i>                                            | text                                                                                                                                                                                         |   |     |   |    |    |              |    |                   |

|     |                                                                                                                                                                   |                                                                                                                                                                                                                                                                         |                                                                   |
|-----|-------------------------------------------------------------------------------------------------------------------------------------------------------------------|-------------------------------------------------------------------------------------------------------------------------------------------------------------------------------------------------------------------------------------------------------------------------|-------------------------------------------------------------------|
| 486 | [id10300_m]<br>Show the field ONLY if:<br>[id10299_m]='1'                                                                                                         | Did she have vaginal bleeding after cessation of menstruation?                                                                                                                                                                                                          | radio<br>1 Yes<br>0 No<br>99 Doesn't know<br>88 Refused to answer |
| 487 | [id10304_m]<br>Show the field ONLY if:<br>[id10299_m]='0' or [id10299_m]='99' or [id10299_m]='88'                                                                 | Did she have a sharp pain in her belly (abdomen) shortly before death?                                                                                                                                                                                                  | radio<br>1 Yes<br>0 No<br>99 Doesn't know<br>88 Refused to answer |
| 488 | [id10305_m]<br>Show the field ONLY if:<br>[id10299_m]='0' or [id10299_m]='99' or [id10299_m]='88'                                                                 | Was she pregnant or in labour at the time of death?<br><i>A "yes" response to this question means a foetus or baby remained in the mother's body after she died, even if she was already in labour.</i>                                                                 | radio<br>1 Yes<br>0 No<br>99 Doesn't know<br>88 Refused to answer |
| 489 | [id10306_m]<br>Show the field ONLY if:<br>[id10305_m]='0' or [id10305_m]='99' or [id10305_m]='88'                                                                 | Did she die within 6 weeks of delivery, abortion or miscarriage?<br><i>A "yes" response to this question means that a foetus or baby was lost or removed or delivered (vaginally or by C-section) within 6 weeks before she died, whether the baby survived or not.</i> | radio<br>1 Yes<br>0 No<br>99 Doesn't know<br>88 Refused to answer |
| 490 | [id10307_m]<br>Show the field ONLY if:<br>([id10306_m]='0' or [id10306_m]='99' or [id10306_m]='88') and ([id10305_m]='0' or [id10305_m]='99' or [id10305_m]='88') | Did this woman die more than 6 weeks after being pregnant or delivering a baby?                                                                                                                                                                                         | radio<br>1 Yes<br>0 No<br>99 Doesn't know<br>88 Refused to answer |
| 491 | [id10309_m]<br>Show the field ONLY if:<br>[id10305_m]='1' or [id10306_m]='1' or [id10307_m]='1'                                                                   | For how many months was she pregnant?<br><i>Important is the distinction between early and late pregnancy (threshold is 6 months). For don't know, enter "99." For refused, enter "88."</i>                                                                             | text                                                              |
| 492 | [id10312_m]<br>Show the field ONLY if:<br>[id10305_m]='1'                                                                                                         | Section Header: <i>Questions About Possible Maternal Deaths</i><br>Did she die during labour or delivery?<br><i>Labor is the period of time by which contractions are less than 10 minutes apart.</i>                                                                   | radio<br>1 Yes<br>0 No<br>99 Doesn't know<br>88 Refused to answer |
| 493 | [id10313_m]<br>Show the field ONLY if:<br>([id10312_m]='0' or [id10312_m]='99' or [id10312_m]='88') or [id10306_m]='1' or [id10307_m]='1'                         | Did she die after delivering a baby?                                                                                                                                                                                                                                    | radio<br>1 Yes<br>0 No<br>99 Doesn't know<br>88 Refused to answer |
| 494 | [id10314_m]<br>Show the field ONLY if:<br>[id10313_m]='1' and ([id10306_m]='1' or [id10307_m]='1')                                                                | Did she die within 24 hours after delivery?                                                                                                                                                                                                                             | radio<br>1 Yes<br>0 No<br>99 Doesn't know<br>88 Refused to answer |
| 495 | [id10315_m]<br>Show the field ONLY if:<br>[id10314_m]='0' or [id10314_m]='99' or [id10314_m]='88'                                                                 | Did she die within 6 weeks of childbirth?                                                                                                                                                                                                                               | radio<br>1 Yes<br>0 No<br>99 Doesn't know<br>88 Refused to answer |

|     |                                                                                                                                                                                                         |                                                                                                                                                  |                                                                                                                                                                                              |   |     |   |    |    |              |    |                   |
|-----|---------------------------------------------------------------------------------------------------------------------------------------------------------------------------------------------------------|--------------------------------------------------------------------------------------------------------------------------------------------------|----------------------------------------------------------------------------------------------------------------------------------------------------------------------------------------------|---|-----|---|----|----|--------------|----|-------------------|
| 496 | [id10316_m]<br>Show the field ONLY if:<br>([id10312_m]='1' or [id10312_m]='99' or [id10312_m]='88') or [id10313_m]='1'                                                                                  | Did she give birth to a live baby (within 6 weeks of her death)?<br><i>The important aspect is if the baby was alive.</i>                        | radio<br><table border="1"> <tr><td>1</td><td>Yes</td></tr> <tr><td>0</td><td>No</td></tr> <tr><td>99</td><td>Doesn't know</td></tr> <tr><td>88</td><td>Refused to answer</td></tr> </table> | 1 | Yes | 0 | No | 99 | Doesn't know | 88 | Refused to answer |
| 1   | Yes                                                                                                                                                                                                     |                                                                                                                                                  |                                                                                                                                                                                              |   |     |   |    |    |              |    |                   |
| 0   | No                                                                                                                                                                                                      |                                                                                                                                                  |                                                                                                                                                                                              |   |     |   |    |    |              |    |                   |
| 99  | Doesn't know                                                                                                                                                                                            |                                                                                                                                                  |                                                                                                                                                                                              |   |     |   |    |    |              |    |                   |
| 88  | Refused to answer                                                                                                                                                                                       |                                                                                                                                                  |                                                                                                                                                                                              |   |     |   |    |    |              |    |                   |
| 497 | [id10317_m]<br>Show the field ONLY if:<br>[id10305_m]='0' or [id10305_m]='99' or [id10305_m]='88' or [id10312_m]='1' or [id10312_m]='99' or [id10312_m]='88' or ([id10305_m]='1' and [id10312_m]='1')   | Did she die during or after a multiple pregnancy?                                                                                                | radio<br><table border="1"> <tr><td>1</td><td>Yes</td></tr> <tr><td>0</td><td>No</td></tr> <tr><td>99</td><td>Doesn't know</td></tr> <tr><td>88</td><td>Refused to answer</td></tr> </table> | 1 | Yes | 0 | No | 99 | Doesn't know | 88 | Refused to answer |
| 1   | Yes                                                                                                                                                                                                     |                                                                                                                                                  |                                                                                                                                                                                              |   |     |   |    |    |              |    |                   |
| 0   | No                                                                                                                                                                                                      |                                                                                                                                                  |                                                                                                                                                                                              |   |     |   |    |    |              |    |                   |
| 99  | Doesn't know                                                                                                                                                                                            |                                                                                                                                                  |                                                                                                                                                                                              |   |     |   |    |    |              |    |                   |
| 88  | Refused to answer                                                                                                                                                                                       |                                                                                                                                                  |                                                                                                                                                                                              |   |     |   |    |    |              |    |                   |
| 498 | [id10318_m]<br>Show the field ONLY if:<br>([id10312_m]='0' or [id10312_m]='99' or [id10312_m]='88') and ([id10314_m]='0' or [id10314_m]='99' or [id10314_m]='88') and [id10316_m]='1'                   | Was she breastfeeding the child in the days before death?                                                                                        | radio<br><table border="1"> <tr><td>1</td><td>Yes</td></tr> <tr><td>0</td><td>No</td></tr> <tr><td>99</td><td>Doesn't know</td></tr> <tr><td>88</td><td>Refused to answer</td></tr> </table> | 1 | Yes | 0 | No | 99 | Doesn't know | 88 | Refused to answer |
| 1   | Yes                                                                                                                                                                                                     |                                                                                                                                                  |                                                                                                                                                                                              |   |     |   |    |    |              |    |                   |
| 0   | No                                                                                                                                                                                                      |                                                                                                                                                  |                                                                                                                                                                                              |   |     |   |    |    |              |    |                   |
| 99  | Doesn't know                                                                                                                                                                                            |                                                                                                                                                  |                                                                                                                                                                                              |   |     |   |    |    |              |    |                   |
| 88  | Refused to answer                                                                                                                                                                                       |                                                                                                                                                  |                                                                                                                                                                                              |   |     |   |    |    |              |    |                   |
| 499 | [id10319_m]<br>Show the field ONLY if:<br>([id10305_m]='0' or [id10305_m]='99' or [id10305_m]='88' or [id10312_m]='0' or [id10312_m]='99' or [id10312_m]='88') or ([id10305_m]='1' and [id10312_m]='1') | How many births, including stillbirths, did she/the mother have before this baby?<br><i>For don't know, enter "99." For refused, enter "88."</i> | text                                                                                                                                                                                         |   |     |   |    |    |              |    |                   |
| 500 | [id10320_m]<br>Show the field ONLY if:<br>[id10319_m]>0                                                                                                                                                 | Had she had any previous Caesarean section?                                                                                                      | radio<br><table border="1"> <tr><td>1</td><td>Yes</td></tr> <tr><td>0</td><td>No</td></tr> <tr><td>99</td><td>Doesn't know</td></tr> <tr><td>88</td><td>Refused to answer</td></tr> </table> | 1 | Yes | 0 | No | 99 | Doesn't know | 88 | Refused to answer |
| 1   | Yes                                                                                                                                                                                                     |                                                                                                                                                  |                                                                                                                                                                                              |   |     |   |    |    |              |    |                   |
| 0   | No                                                                                                                                                                                                      |                                                                                                                                                  |                                                                                                                                                                                              |   |     |   |    |    |              |    |                   |
| 99  | Doesn't know                                                                                                                                                                                            |                                                                                                                                                  |                                                                                                                                                                                              |   |     |   |    |    |              |    |                   |
| 88  | Refused to answer                                                                                                                                                                                       |                                                                                                                                                  |                                                                                                                                                                                              |   |     |   |    |    |              |    |                   |
| 501 | [id10321_m]<br>Show the field ONLY if:<br>[id10305_m]='0' or [id10305_m]='99' or [id10305_m]='88' or [id10312_m]='0' or [id10312_m]='99' or [id10312_m]='88' or ([id10305_m]='1' and [id10312_m]='1')   | During pregnancy, did she suffer from high blood pressure?                                                                                       | radio<br><table border="1"> <tr><td>1</td><td>Yes</td></tr> <tr><td>0</td><td>No</td></tr> <tr><td>99</td><td>Doesn't know</td></tr> <tr><td>88</td><td>Refused to answer</td></tr> </table> | 1 | Yes | 0 | No | 99 | Doesn't know | 88 | Refused to answer |
| 1   | Yes                                                                                                                                                                                                     |                                                                                                                                                  |                                                                                                                                                                                              |   |     |   |    |    |              |    |                   |
| 0   | No                                                                                                                                                                                                      |                                                                                                                                                  |                                                                                                                                                                                              |   |     |   |    |    |              |    |                   |
| 99  | Doesn't know                                                                                                                                                                                            |                                                                                                                                                  |                                                                                                                                                                                              |   |     |   |    |    |              |    |                   |
| 88  | Refused to answer                                                                                                                                                                                       |                                                                                                                                                  |                                                                                                                                                                                              |   |     |   |    |    |              |    |                   |
| 502 | [id10322_m]<br>Show the field ONLY if:<br>[id10305_m]='0' or [id10305_m]='99' or [id10305_m]='88' or [id10312_m]='0' or [id10312_m]='99' or [id10312_m]='88' or ([id10305_m]='1' and [id10312_m]='1')   | Did she have foul smelling vaginal discharge during pregnancy or after delivery?                                                                 | radio<br><table border="1"> <tr><td>1</td><td>Yes</td></tr> <tr><td>0</td><td>No</td></tr> <tr><td>99</td><td>Doesn't know</td></tr> <tr><td>88</td><td>Refused to answer</td></tr> </table> | 1 | Yes | 0 | No | 99 | Doesn't know | 88 | Refused to answer |
| 1   | Yes                                                                                                                                                                                                     |                                                                                                                                                  |                                                                                                                                                                                              |   |     |   |    |    |              |    |                   |
| 0   | No                                                                                                                                                                                                      |                                                                                                                                                  |                                                                                                                                                                                              |   |     |   |    |    |              |    |                   |
| 99  | Doesn't know                                                                                                                                                                                            |                                                                                                                                                  |                                                                                                                                                                                              |   |     |   |    |    |              |    |                   |
| 88  | Refused to answer                                                                                                                                                                                       |                                                                                                                                                  |                                                                                                                                                                                              |   |     |   |    |    |              |    |                   |
| 503 | [id10323_m]<br>Show the field ONLY if:<br>[id10305_m]='0' or [id10305_m]='99' or [id10305_m]='88' or [id10312_m]='0' or [id10312_m]='99' or [id10312_m]='88' or ([id10305_m]='1' and [id10312_m]='1')   | During the last 3 months of pregnancy, did she suffer from convulsions?                                                                          | radio<br><table border="1"> <tr><td>1</td><td>Yes</td></tr> <tr><td>0</td><td>No</td></tr> <tr><td>99</td><td>Doesn't know</td></tr> <tr><td>88</td><td>Refused to answer</td></tr> </table> | 1 | Yes | 0 | No | 99 | Doesn't know | 88 | Refused to answer |
| 1   | Yes                                                                                                                                                                                                     |                                                                                                                                                  |                                                                                                                                                                                              |   |     |   |    |    |              |    |                   |
| 0   | No                                                                                                                                                                                                      |                                                                                                                                                  |                                                                                                                                                                                              |   |     |   |    |    |              |    |                   |
| 99  | Doesn't know                                                                                                                                                                                            |                                                                                                                                                  |                                                                                                                                                                                              |   |     |   |    |    |              |    |                   |
| 88  | Refused to answer                                                                                                                                                                                       |                                                                                                                                                  |                                                                                                                                                                                              |   |     |   |    |    |              |    |                   |

|     |                                                                                                                                                                                                                                                  |                                                                                                                                                                                                                                                                                        |                                                                   |
|-----|--------------------------------------------------------------------------------------------------------------------------------------------------------------------------------------------------------------------------------------------------|----------------------------------------------------------------------------------------------------------------------------------------------------------------------------------------------------------------------------------------------------------------------------------------|-------------------------------------------------------------------|
| 504 | [id10324_m]<br>Show the field ONLY if:<br>[id10305_m]='0' or [id10305_m]='99' or [id10305_m]='88' or [id10312_m]='0' or [id10312_m]='99' or [id10312_m]='88' or ([id10305_m]='1' and [id10312_m]='1')                                            | During the last 3 months of pregnancy did she suffer from blurred vision?                                                                                                                                                                                                              | radio<br>1 Yes<br>0 No<br>99 Doesn't know<br>88 Refused to answer |
| 505 | [id10325_m]<br>Show the field ONLY if:<br>[id10305_m]='0' or [id10305_m]='99' or [id10305_m]='88' or [id10312_m]='0' or [id10312_m]='99' or [id10312_m]='88' or ([id10305_m]='1' and [id10312_m]='1')                                            | Did bleeding occur while she was pregnant?                                                                                                                                                                                                                                             | radio<br>1 Yes<br>0 No<br>99 Doesn't know<br>88 Refused to answer |
| 506 | [id10326_m]<br>Show the field ONLY if:<br>[id10325_m]='1'                                                                                                                                                                                        | Was there vaginal bleeding during the first 6 months of pregnancy?                                                                                                                                                                                                                     | radio<br>1 Yes<br>0 No<br>99 Doesn't know<br>88 Refused to answer |
| 507 | [id10327_m]<br>Show the field ONLY if:<br>[id10325_m]='1'                                                                                                                                                                                        | Was there vaginal bleeding during the last 3 months of pregnancy but before labour started?                                                                                                                                                                                            | radio<br>1 Yes<br>0 No<br>99 Doesn't know<br>88 Refused to answer |
| 508 | [id10328_m]<br>Show the field ONLY if:<br>([id10305_m]='1' and [id10312_m]='1') or [id10306_m]='1' or ([id10305_m]='0' and [id10306_m]='1') or ([id10305_m]='0' and [id10306_m]='0' and [id10307_m]='1') or ([id10316_m]='1' or [id10316_m]='0') | Did she have excessive bleeding during labour or delivery?<br><i>Here the excessive quantity of blood DURING birth is what we ask for</i>                                                                                                                                              | radio<br>1 Yes<br>0 No<br>99 Doesn't know<br>88 Refused to answer |
| 509 | [id10329_m]<br>Show the field ONLY if:<br>([id10305_m]='0' or [id10305_m]='99' or [id10305_m]='88') and ([id10312_m]='1' or [id10312_m]='99' or [id10312_m]='88')                                                                                | Did she have excessive bleeding after delivery or abortion?<br><i>Here the excessive quantity of blood AFTER birth is what we ask for</i>                                                                                                                                              | radio<br>1 Yes<br>0 No<br>99 Doesn't know<br>88 Refused to answer |
| 510 | [id10330_m]<br>Show the field ONLY if:<br>([id10305_m]='1' and [id10312_m]='1') or [id10306_m]='1' or ([id10305_m]='0' and [id10306_m]='1') or ([id10305_m]='0' and [id10306_m]='0' and [id10307_m]='1') or ([id10316_m]='1' or [id10316_m]='0') | Was the placenta completely delivered?                                                                                                                                                                                                                                                 | radio<br>1 Yes<br>0 No<br>99 Doesn't know<br>88 Refused to answer |
| 511 | [id10331_m]<br>Show the field ONLY if:<br>([id10305_m]='1' and [id10312_m]='1') or [id10306_m]='1' or ([id10305_m]='0' and [id10306_m]='1') or ([id10305_m]='0' and [id10306_m]='0' and [id10307_m]='1') or ([id10316_m]='1' or [id10316_m]='0') | Did she deliver or try to deliver an abnormally positioned baby?<br><i>Enquire the respondent about theirs understanding of what is an abnormally positioned baby; if unclear or wrong, explain that it refers to babys' whose first body part exiting the vagina is not the head.</i> | radio<br>1 Yes<br>0 No<br>99 Doesn't know<br>88 Refused to answer |

|     |                                                                                                                                                                                                                                                                                                                                                                              |                                                                                                                                                                                                                                           |                                                                                                                                                                                                                                                                                                                                                          |   |          |   |                       |    |              |    |                                  |   |       |    |              |    |                   |
|-----|------------------------------------------------------------------------------------------------------------------------------------------------------------------------------------------------------------------------------------------------------------------------------------------------------------------------------------------------------------------------------|-------------------------------------------------------------------------------------------------------------------------------------------------------------------------------------------------------------------------------------------|----------------------------------------------------------------------------------------------------------------------------------------------------------------------------------------------------------------------------------------------------------------------------------------------------------------------------------------------------------|---|----------|---|-----------------------|----|--------------|----|----------------------------------|---|-------|----|--------------|----|-------------------|
| 512 | <p>[id10332_m]</p> <p>Show the field ONLY if:<br/>         ([id10305_m]='1' and [id10312_m]='1') or [id10306_m]='1' or ([id10305_m]='0' and [id10306_m]='1') or ([id10305_m]='0' and [id10306_m]='0' and [id10307_m]='1') or ([id10316_m]='1' or [id10316_m]='0')</p>                                                                                                        | <p>For how many hours was she in labour?</p> <p><i>The answer could be given in another unit, but for data entry use hours. Less than 60 minutes = 0 hours. 1 day=24 hours. Enter "99" for "don't know." Enter "88" for "refuse."</i></p> | text                                                                                                                                                                                                                                                                                                                                                     |   |          |   |                       |    |              |    |                                  |   |       |    |              |    |                   |
| 513 | [id10333_m]                                                                                                                                                                                                                                                                                                                                                                  | Did she attempt to terminate the pregnancy?                                                                                                                                                                                               | <p>radio</p> <table border="1"> <tr><td>1</td><td>Yes</td></tr> <tr><td>0</td><td>No</td></tr> <tr><td>99</td><td>Doesn't know</td></tr> <tr><td>88</td><td>Refused to answer</td></tr> </table>                                                                                                                                                         | 1 | Yes      | 0 | No                    | 99 | Doesn't know | 88 | Refused to answer                |   |       |    |              |    |                   |
| 1   | Yes                                                                                                                                                                                                                                                                                                                                                                          |                                                                                                                                                                                                                                           |                                                                                                                                                                                                                                                                                                                                                          |   |          |   |                       |    |              |    |                                  |   |       |    |              |    |                   |
| 0   | No                                                                                                                                                                                                                                                                                                                                                                           |                                                                                                                                                                                                                                           |                                                                                                                                                                                                                                                                                                                                                          |   |          |   |                       |    |              |    |                                  |   |       |    |              |    |                   |
| 99  | Doesn't know                                                                                                                                                                                                                                                                                                                                                                 |                                                                                                                                                                                                                                           |                                                                                                                                                                                                                                                                                                                                                          |   |          |   |                       |    |              |    |                                  |   |       |    |              |    |                   |
| 88  | Refused to answer                                                                                                                                                                                                                                                                                                                                                            |                                                                                                                                                                                                                                           |                                                                                                                                                                                                                                                                                                                                                          |   |          |   |                       |    |              |    |                                  |   |       |    |              |    |                   |
| 514 | <p>[id10334_m]</p> <p>Show the field ONLY if:<br/>         [id10316_m]='0' or [id10316_m]='99' or [id10316_m]='88'</p>                                                                                                                                                                                                                                                       | Did she recently have a pregnancy that ended in an abortion (spontaneous or induced)?                                                                                                                                                     | <p>radio</p> <table border="1"> <tr><td>1</td><td>Yes</td></tr> <tr><td>0</td><td>No</td></tr> <tr><td>99</td><td>Doesn't know</td></tr> <tr><td>88</td><td>Refused to answer</td></tr> </table>                                                                                                                                                         | 1 | Yes      | 0 | No                    | 99 | Doesn't know | 88 | Refused to answer                |   |       |    |              |    |                   |
| 1   | Yes                                                                                                                                                                                                                                                                                                                                                                          |                                                                                                                                                                                                                                           |                                                                                                                                                                                                                                                                                                                                                          |   |          |   |                       |    |              |    |                                  |   |       |    |              |    |                   |
| 0   | No                                                                                                                                                                                                                                                                                                                                                                           |                                                                                                                                                                                                                                           |                                                                                                                                                                                                                                                                                                                                                          |   |          |   |                       |    |              |    |                                  |   |       |    |              |    |                   |
| 99  | Doesn't know                                                                                                                                                                                                                                                                                                                                                                 |                                                                                                                                                                                                                                           |                                                                                                                                                                                                                                                                                                                                                          |   |          |   |                       |    |              |    |                                  |   |       |    |              |    |                   |
| 88  | Refused to answer                                                                                                                                                                                                                                                                                                                                                            |                                                                                                                                                                                                                                           |                                                                                                                                                                                                                                                                                                                                                          |   |          |   |                       |    |              |    |                                  |   |       |    |              |    |                   |
| 515 | <p>[id10335_m]</p> <p>Show the field ONLY if:<br/>         [id10334_m]='1'</p>                                                                                                                                                                                                                                                                                               | Did she die during an abortion?                                                                                                                                                                                                           | <p>radio</p> <table border="1"> <tr><td>1</td><td>Yes</td></tr> <tr><td>0</td><td>No</td></tr> <tr><td>99</td><td>Doesn't know</td></tr> <tr><td>88</td><td>Refused to answer</td></tr> </table>                                                                                                                                                         | 1 | Yes      | 0 | No                    | 99 | Doesn't know | 88 | Refused to answer                |   |       |    |              |    |                   |
| 1   | Yes                                                                                                                                                                                                                                                                                                                                                                          |                                                                                                                                                                                                                                           |                                                                                                                                                                                                                                                                                                                                                          |   |          |   |                       |    |              |    |                                  |   |       |    |              |    |                   |
| 0   | No                                                                                                                                                                                                                                                                                                                                                                           |                                                                                                                                                                                                                                           |                                                                                                                                                                                                                                                                                                                                                          |   |          |   |                       |    |              |    |                                  |   |       |    |              |    |                   |
| 99  | Doesn't know                                                                                                                                                                                                                                                                                                                                                                 |                                                                                                                                                                                                                                           |                                                                                                                                                                                                                                                                                                                                                          |   |          |   |                       |    |              |    |                                  |   |       |    |              |    |                   |
| 88  | Refused to answer                                                                                                                                                                                                                                                                                                                                                            |                                                                                                                                                                                                                                           |                                                                                                                                                                                                                                                                                                                                                          |   |          |   |                       |    |              |    |                                  |   |       |    |              |    |                   |
| 516 | <p>[id10336_m]</p> <p>Show the field ONLY if:<br/>         [id10334_m]='1' and ([id10335_m]='0' or [id10335_m]='99' or [id10335_m]='88') and ([id10305_m]='0' or [id10305_m]='99' or [id10305_m]='88') and [id10312_m]='1'</p>                                                                                                                                               | Did she die within 6 weeks of having an abortion?                                                                                                                                                                                         | <p>radio</p> <table border="1"> <tr><td>1</td><td>Yes</td></tr> <tr><td>0</td><td>No</td></tr> <tr><td>99</td><td>Doesn't know</td></tr> <tr><td>88</td><td>Refused to answer</td></tr> </table>                                                                                                                                                         | 1 | Yes      | 0 | No                    | 99 | Doesn't know | 88 | Refused to answer                |   |       |    |              |    |                   |
| 1   | Yes                                                                                                                                                                                                                                                                                                                                                                          |                                                                                                                                                                                                                                           |                                                                                                                                                                                                                                                                                                                                                          |   |          |   |                       |    |              |    |                                  |   |       |    |              |    |                   |
| 0   | No                                                                                                                                                                                                                                                                                                                                                                           |                                                                                                                                                                                                                                           |                                                                                                                                                                                                                                                                                                                                                          |   |          |   |                       |    |              |    |                                  |   |       |    |              |    |                   |
| 99  | Doesn't know                                                                                                                                                                                                                                                                                                                                                                 |                                                                                                                                                                                                                                           |                                                                                                                                                                                                                                                                                                                                                          |   |          |   |                       |    |              |    |                                  |   |       |    |              |    |                   |
| 88  | Refused to answer                                                                                                                                                                                                                                                                                                                                                            |                                                                                                                                                                                                                                           |                                                                                                                                                                                                                                                                                                                                                          |   |          |   |                       |    |              |    |                                  |   |       |    |              |    |                   |
| 517 | <p>[id10337_m]</p> <p>Show the field ONLY if:<br/>         (([id10312_m]='1' or [id10312_m]='99' or [id10312_m]='88') and [id10305_m]='1') or [id10316_m]='1' or ([id10316_m]='0' and ([id10333_m]='1' or [id10334_m]='1' or [id10336_m]='1')) or ([id10316_m]='0' and [id10333_m]='0' and [id10334_m]='0') or ([id10305_m]='0' and [id10306_m]='0' and [id10307_m]='1')</p> | Where did she give birth / complete the miscarriage / perform the abortion?                                                                                                                                                               | <p>radio</p> <table border="1"> <tr><td>1</td><td>Hospital</td></tr> <tr><td>2</td><td>Other health facility</td></tr> <tr><td>3</td><td>Home</td></tr> <tr><td>4</td><td>On route to hospital or facility</td></tr> <tr><td>5</td><td>Other</td></tr> <tr><td>99</td><td>Doesn't know</td></tr> <tr><td>88</td><td>Refused to answer</td></tr> </table> | 1 | Hospital | 2 | Other health facility | 3  | Home         | 4  | On route to hospital or facility | 5 | Other | 99 | Doesn't know | 88 | Refused to answer |
| 1   | Hospital                                                                                                                                                                                                                                                                                                                                                                     |                                                                                                                                                                                                                                           |                                                                                                                                                                                                                                                                                                                                                          |   |          |   |                       |    |              |    |                                  |   |       |    |              |    |                   |
| 2   | Other health facility                                                                                                                                                                                                                                                                                                                                                        |                                                                                                                                                                                                                                           |                                                                                                                                                                                                                                                                                                                                                          |   |          |   |                       |    |              |    |                                  |   |       |    |              |    |                   |
| 3   | Home                                                                                                                                                                                                                                                                                                                                                                         |                                                                                                                                                                                                                                           |                                                                                                                                                                                                                                                                                                                                                          |   |          |   |                       |    |              |    |                                  |   |       |    |              |    |                   |
| 4   | On route to hospital or facility                                                                                                                                                                                                                                                                                                                                             |                                                                                                                                                                                                                                           |                                                                                                                                                                                                                                                                                                                                                          |   |          |   |                       |    |              |    |                                  |   |       |    |              |    |                   |
| 5   | Other                                                                                                                                                                                                                                                                                                                                                                        |                                                                                                                                                                                                                                           |                                                                                                                                                                                                                                                                                                                                                          |   |          |   |                       |    |              |    |                                  |   |       |    |              |    |                   |
| 99  | Doesn't know                                                                                                                                                                                                                                                                                                                                                                 |                                                                                                                                                                                                                                           |                                                                                                                                                                                                                                                                                                                                                          |   |          |   |                       |    |              |    |                                  |   |       |    |              |    |                   |
| 88  | Refused to answer                                                                                                                                                                                                                                                                                                                                                            |                                                                                                                                                                                                                                           |                                                                                                                                                                                                                                                                                                                                                          |   |          |   |                       |    |              |    |                                  |   |       |    |              |    |                   |
| 518 | <p>[id10338_m]</p> <p>Show the field ONLY if:<br/>         (([id10312_m]='1' or [id10312_m]='99' or [id10312_m]='88') and [id10305_m]='1') or [id10316_m]='1' or ([id10316_m]='0' and ([id10333_m]='1' or [id10334_m]='1' or [id10336_m]='1')) or ([id10316_m]='0' and [id10333_m]='0' and [id10334_m]='0') or ([id10305_m]='0' and [id10306_m]='0' and [id10307_m]='1')</p> | <p>Did she receive professional assistance during the delivery?</p> <p><i>Explain to the respondent what is meant by professional assistance: delivery attended by a medical professional (doctor, nurse or midwife).</i></p>             | <p>radio</p> <table border="1"> <tr><td>1</td><td>Yes</td></tr> <tr><td>0</td><td>No</td></tr> <tr><td>99</td><td>Doesn't know</td></tr> <tr><td>88</td><td>Refused to answer</td></tr> </table>                                                                                                                                                         | 1 | Yes      | 0 | No                    | 99 | Doesn't know | 88 | Refused to answer                |   |       |    |              |    |                   |
| 1   | Yes                                                                                                                                                                                                                                                                                                                                                                          |                                                                                                                                                                                                                                           |                                                                                                                                                                                                                                                                                                                                                          |   |          |   |                       |    |              |    |                                  |   |       |    |              |    |                   |
| 0   | No                                                                                                                                                                                                                                                                                                                                                                           |                                                                                                                                                                                                                                           |                                                                                                                                                                                                                                                                                                                                                          |   |          |   |                       |    |              |    |                                  |   |       |    |              |    |                   |
| 99  | Doesn't know                                                                                                                                                                                                                                                                                                                                                                 |                                                                                                                                                                                                                                           |                                                                                                                                                                                                                                                                                                                                                          |   |          |   |                       |    |              |    |                                  |   |       |    |              |    |                   |
| 88  | Refused to answer                                                                                                                                                                                                                                                                                                                                                            |                                                                                                                                                                                                                                           |                                                                                                                                                                                                                                                                                                                                                          |   |          |   |                       |    |              |    |                                  |   |       |    |              |    |                   |

|     |                                                                                                                                                                                                                                                                                                                                          |                                                                                                                            |                                                                                                                                                                       |
|-----|------------------------------------------------------------------------------------------------------------------------------------------------------------------------------------------------------------------------------------------------------------------------------------------------------------------------------------------|----------------------------------------------------------------------------------------------------------------------------|-----------------------------------------------------------------------------------------------------------------------------------------------------------------------|
| 519 | [id10339_m]<br>Show the field ONLY if:<br>(((id10312_m)=1' or [id10312_m]=99' or [id10312_m]=88') and [id10305_m]=1') or [id10316_m]=1' or ([id10316_m]=0' and ([id10333_m]=1' or [id10334_m]=1' or [id10336_m]=1')) or ([id10316_m]=0' and [id10333_m]=0' and [id10334_m]=0') or ([id10305_m]=0' and [id10306_m]=0' and [id10307_m]=1') | Who delivered the baby / completed the miscarriage?                                                                        | radio<br>1 Doctor<br>2 Midwife<br>3 Nurse<br>4 Relative<br>5 Self (the mother)<br>6 Traditional birth attendant<br>7 Other<br>99 Doesn't know<br>88 Refused to answer |
| 520 | [id10342_m]<br>Show the field ONLY if:<br>[id10313_m]=1' or [id10314_m]=1'                                                                                                                                                                                                                                                               | Section Header: <i>How did the mother deliver her baby?</i><br>Was the delivery normal vaginal, without forceps or vacuum? | radio<br>1 Yes<br>0 No<br>99 Doesn't know<br>88 Refused to answer                                                                                                     |
| 521 | [id10343_m]<br>Show the field ONLY if:<br>[id10342_m]=0' or [id10342_m]=99' or [id10342_m]=88'                                                                                                                                                                                                                                           | Was the delivery vaginal, with forceps or vacuum?                                                                          | radio<br>1 Yes<br>0 No<br>99 Doesn't know<br>88 Refused to answer                                                                                                     |
| 522 | [id10344_m]<br>Show the field ONLY if:<br>([id10342_m]=0' or [id10342_m]=99' or [id10342_m]=88') and ([id10343_m]=0' or [id10343_m]=99' or [id10343_m]=88')                                                                                                                                                                              | Was the delivery a Caesarean section?                                                                                      | radio<br>1 Yes<br>0 No<br>99 Doesn't know<br>88 Refused to answer                                                                                                     |
| 523 | [id10347_m]<br>Show the field ONLY if:<br>[id10313_m]=1' or [id10314_m]=1'                                                                                                                                                                                                                                                               | Was the baby born more than one month early?                                                                               | radio<br>1 Yes<br>0 No<br>99 Doesn't know<br>88 Refused to answer                                                                                                     |
| 524 | [id10340_m]<br>Show the field ONLY if:<br>[id10334_m]=1' or [id10315_m]=1' or [id10313_m]=1' or ([id10305_m]=1' and ([id10312_m]=1' or [id10312_m]=0')) or ([id10305_m]=0' and [id10306_m]=0' and [id10307_m]=1')                                                                                                                        | Did she have an operation to remove her uterus shortly before death?                                                       | radio<br>1 Yes<br>0 No<br>99 Doesn't know<br>88 Refused to answer                                                                                                     |
| 525 | [id10411_m]                                                                                                                                                                                                                                                                                                                              | Section Header: <i>Risk Factors</i><br>Did she drink alcohol?                                                              | radio<br>1 Yes<br>0 No<br>99 Doesn't know<br>88 Refused to answer                                                                                                     |
| 526 | [id10412_m]                                                                                                                                                                                                                                                                                                                              | Did she use tobacco?                                                                                                       | radio<br>1 Yes<br>0 No<br>99 Doesn't know<br>88 Refused to answer                                                                                                     |

|     |                                                                                                                                        |                                                                                                                                  |                                                                                                                                                                                                                                                                                                                                                                                                                                                                                               |   |              |            |    |              |              |    |                   |                 |   |              |                       |   |              |       |    |               |              |    |               |                   |
|-----|----------------------------------------------------------------------------------------------------------------------------------------|----------------------------------------------------------------------------------------------------------------------------------|-----------------------------------------------------------------------------------------------------------------------------------------------------------------------------------------------------------------------------------------------------------------------------------------------------------------------------------------------------------------------------------------------------------------------------------------------------------------------------------------------|---|--------------|------------|----|--------------|--------------|----|-------------------|-----------------|---|--------------|-----------------------|---|--------------|-------|----|---------------|--------------|----|---------------|-------------------|
| 527 | [id10413_m]                                                                                                                            | Did she smoke tobacco (cigarette, cigar, pipe, etc.)?                                                                            | radio<br><table border="1"> <tr><td>1</td><td>Yes</td></tr> <tr><td>0</td><td>No</td></tr> <tr><td>99</td><td>Doesn't know</td></tr> <tr><td>88</td><td>Refused to answer</td></tr> </table>                                                                                                                                                                                                                                                                                                  | 1 | Yes          | 0          | No | 99           | Doesn't know | 88 | Refused to answer |                 |   |              |                       |   |              |       |    |               |              |    |               |                   |
| 1   | Yes                                                                                                                                    |                                                                                                                                  |                                                                                                                                                                                                                                                                                                                                                                                                                                                                                               |   |              |            |    |              |              |    |                   |                 |   |              |                       |   |              |       |    |               |              |    |               |                   |
| 0   | No                                                                                                                                     |                                                                                                                                  |                                                                                                                                                                                                                                                                                                                                                                                                                                                                                               |   |              |            |    |              |              |    |                   |                 |   |              |                       |   |              |       |    |               |              |    |               |                   |
| 99  | Doesn't know                                                                                                                           |                                                                                                                                  |                                                                                                                                                                                                                                                                                                                                                                                                                                                                                               |   |              |            |    |              |              |    |                   |                 |   |              |                       |   |              |       |    |               |              |    |               |                   |
| 88  | Refused to answer                                                                                                                      |                                                                                                                                  |                                                                                                                                                                                                                                                                                                                                                                                                                                                                                               |   |              |            |    |              |              |    |                   |                 |   |              |                       |   |              |       |    |               |              |    |               |                   |
| 528 | [id10414_m]<br>Show the field ONLY if:<br>[id10413_m]='1' or ([id10412_m]='1' and [id10413_m]='0')                                     | What kind of tobacco did she use?                                                                                                | checkbox<br><table border="1"> <tr><td>1</td><td>id10414_m__1</td><td>Cigarettes</td></tr> <tr><td>2</td><td>id10414_m__2</td><td>Pipe</td></tr> <tr><td>3</td><td>id10414_m__3</td><td>Chewing tobacco</td></tr> <tr><td>4</td><td>id10414_m__4</td><td>Local form of tobacco</td></tr> <tr><td>5</td><td>id10414_m__5</td><td>Other</td></tr> <tr><td>99</td><td>id10414_m__99</td><td>Doesn't know</td></tr> <tr><td>88</td><td>id10414_m__88</td><td>Refused to answer</td></tr> </table> | 1 | id10414_m__1 | Cigarettes | 2  | id10414_m__2 | Pipe         | 3  | id10414_m__3      | Chewing tobacco | 4 | id10414_m__4 | Local form of tobacco | 5 | id10414_m__5 | Other | 99 | id10414_m__99 | Doesn't know | 88 | id10414_m__88 | Refused to answer |
| 1   | id10414_m__1                                                                                                                           | Cigarettes                                                                                                                       |                                                                                                                                                                                                                                                                                                                                                                                                                                                                                               |   |              |            |    |              |              |    |                   |                 |   |              |                       |   |              |       |    |               |              |    |               |                   |
| 2   | id10414_m__2                                                                                                                           | Pipe                                                                                                                             |                                                                                                                                                                                                                                                                                                                                                                                                                                                                                               |   |              |            |    |              |              |    |                   |                 |   |              |                       |   |              |       |    |               |              |    |               |                   |
| 3   | id10414_m__3                                                                                                                           | Chewing tobacco                                                                                                                  |                                                                                                                                                                                                                                                                                                                                                                                                                                                                                               |   |              |            |    |              |              |    |                   |                 |   |              |                       |   |              |       |    |               |              |    |               |                   |
| 4   | id10414_m__4                                                                                                                           | Local form of tobacco                                                                                                            |                                                                                                                                                                                                                                                                                                                                                                                                                                                                                               |   |              |            |    |              |              |    |                   |                 |   |              |                       |   |              |       |    |               |              |    |               |                   |
| 5   | id10414_m__5                                                                                                                           | Other                                                                                                                            |                                                                                                                                                                                                                                                                                                                                                                                                                                                                                               |   |              |            |    |              |              |    |                   |                 |   |              |                       |   |              |       |    |               |              |    |               |                   |
| 99  | id10414_m__99                                                                                                                          | Doesn't know                                                                                                                     |                                                                                                                                                                                                                                                                                                                                                                                                                                                                                               |   |              |            |    |              |              |    |                   |                 |   |              |                       |   |              |       |    |               |              |    |               |                   |
| 88  | id10414_m__88                                                                                                                          | Refused to answer                                                                                                                |                                                                                                                                                                                                                                                                                                                                                                                                                                                                                               |   |              |            |    |              |              |    |                   |                 |   |              |                       |   |              |       |    |               |              |    |               |                   |
| 529 | [id10414_check_m]<br>Show the field ONLY if:<br>[id10413_m]='0' and ([id10414_m(1)='1' or [id10414_m(2)='1'])                          | It is not possible to select cigarettes or pipe and "no" to "Did she smoke tobacco?". Please go back and correct the selections. | descriptive                                                                                                                                                                                                                                                                                                                                                                                                                                                                                   |   |              |            |    |              |              |    |                   |                 |   |              |                       |   |              |       |    |               |              |    |               |                   |
| 530 | [id10415_m]<br>Show the field ONLY if:<br>[id10414_m(1)] = '1'                                                                         | How many cigarettes did she smoke daily?                                                                                         | text                                                                                                                                                                                                                                                                                                                                                                                                                                                                                          |   |              |            |    |              |              |    |                   |                 |   |              |                       |   |              |       |    |               |              |    |               |                   |
| 531 | [id10416_m]<br>Show the field ONLY if:<br>[id10414_m(2)] = '1' or [id10414_m(3)] = '1' or [id10414_m(4)] = '1' or [id10414_m(5)] = '1' | How many times did she use tobacco products each day?                                                                            | text                                                                                                                                                                                                                                                                                                                                                                                                                                                                                          |   |              |            |    |              |              |    |                   |                 |   |              |                       |   |              |       |    |               |              |    |               |                   |
| 532 | [id10418_m]                                                                                                                            | Section Header: <i>Health Service Utilisation</i><br>Did she receive any treatment for the illness that led to death?            | radio<br><table border="1"> <tr><td>1</td><td>Yes</td></tr> <tr><td>0</td><td>No</td></tr> <tr><td>99</td><td>Doesn't know</td></tr> <tr><td>88</td><td>Refused to answer</td></tr> </table>                                                                                                                                                                                                                                                                                                  | 1 | Yes          | 0          | No | 99           | Doesn't know | 88 | Refused to answer |                 |   |              |                       |   |              |       |    |               |              |    |               |                   |
| 1   | Yes                                                                                                                                    |                                                                                                                                  |                                                                                                                                                                                                                                                                                                                                                                                                                                                                                               |   |              |            |    |              |              |    |                   |                 |   |              |                       |   |              |       |    |               |              |    |               |                   |
| 0   | No                                                                                                                                     |                                                                                                                                  |                                                                                                                                                                                                                                                                                                                                                                                                                                                                                               |   |              |            |    |              |              |    |                   |                 |   |              |                       |   |              |       |    |               |              |    |               |                   |
| 99  | Doesn't know                                                                                                                           |                                                                                                                                  |                                                                                                                                                                                                                                                                                                                                                                                                                                                                                               |   |              |            |    |              |              |    |                   |                 |   |              |                       |   |              |       |    |               |              |    |               |                   |
| 88  | Refused to answer                                                                                                                      |                                                                                                                                  |                                                                                                                                                                                                                                                                                                                                                                                                                                                                                               |   |              |            |    |              |              |    |                   |                 |   |              |                       |   |              |       |    |               |              |    |               |                   |
| 533 | [id10419_m]<br>Show the field ONLY if:<br>[id10418_m]='1'                                                                              | Did she receive oral rehydration salts?                                                                                          | radio<br><table border="1"> <tr><td>1</td><td>Yes</td></tr> <tr><td>0</td><td>No</td></tr> <tr><td>99</td><td>Doesn't know</td></tr> <tr><td>88</td><td>Refused to answer</td></tr> </table>                                                                                                                                                                                                                                                                                                  | 1 | Yes          | 0          | No | 99           | Doesn't know | 88 | Refused to answer |                 |   |              |                       |   |              |       |    |               |              |    |               |                   |
| 1   | Yes                                                                                                                                    |                                                                                                                                  |                                                                                                                                                                                                                                                                                                                                                                                                                                                                                               |   |              |            |    |              |              |    |                   |                 |   |              |                       |   |              |       |    |               |              |    |               |                   |
| 0   | No                                                                                                                                     |                                                                                                                                  |                                                                                                                                                                                                                                                                                                                                                                                                                                                                                               |   |              |            |    |              |              |    |                   |                 |   |              |                       |   |              |       |    |               |              |    |               |                   |
| 99  | Doesn't know                                                                                                                           |                                                                                                                                  |                                                                                                                                                                                                                                                                                                                                                                                                                                                                                               |   |              |            |    |              |              |    |                   |                 |   |              |                       |   |              |       |    |               |              |    |               |                   |
| 88  | Refused to answer                                                                                                                      |                                                                                                                                  |                                                                                                                                                                                                                                                                                                                                                                                                                                                                                               |   |              |            |    |              |              |    |                   |                 |   |              |                       |   |              |       |    |               |              |    |               |                   |
| 534 | [id10420_m]<br>Show the field ONLY if:<br>[id10418_m]='1'                                                                              | Did she receive (or need) intravenous fluids (drip) treatment?                                                                   | radio<br><table border="1"> <tr><td>1</td><td>Yes</td></tr> <tr><td>0</td><td>No</td></tr> <tr><td>99</td><td>Doesn't know</td></tr> <tr><td>88</td><td>Refused to answer</td></tr> </table>                                                                                                                                                                                                                                                                                                  | 1 | Yes          | 0          | No | 99           | Doesn't know | 88 | Refused to answer |                 |   |              |                       |   |              |       |    |               |              |    |               |                   |
| 1   | Yes                                                                                                                                    |                                                                                                                                  |                                                                                                                                                                                                                                                                                                                                                                                                                                                                                               |   |              |            |    |              |              |    |                   |                 |   |              |                       |   |              |       |    |               |              |    |               |                   |
| 0   | No                                                                                                                                     |                                                                                                                                  |                                                                                                                                                                                                                                                                                                                                                                                                                                                                                               |   |              |            |    |              |              |    |                   |                 |   |              |                       |   |              |       |    |               |              |    |               |                   |
| 99  | Doesn't know                                                                                                                           |                                                                                                                                  |                                                                                                                                                                                                                                                                                                                                                                                                                                                                                               |   |              |            |    |              |              |    |                   |                 |   |              |                       |   |              |       |    |               |              |    |               |                   |
| 88  | Refused to answer                                                                                                                      |                                                                                                                                  |                                                                                                                                                                                                                                                                                                                                                                                                                                                                                               |   |              |            |    |              |              |    |                   |                 |   |              |                       |   |              |       |    |               |              |    |               |                   |
| 535 | [id10421_m]<br>Show the field ONLY if:<br>[id10418_m]='1'                                                                              | Did she receive (or need) a blood transfusion?                                                                                   | radio<br><table border="1"> <tr><td>1</td><td>Yes</td></tr> <tr><td>0</td><td>No</td></tr> <tr><td>99</td><td>Doesn't know</td></tr> <tr><td>88</td><td>Refused to answer</td></tr> </table>                                                                                                                                                                                                                                                                                                  | 1 | Yes          | 0          | No | 99           | Doesn't know | 88 | Refused to answer |                 |   |              |                       |   |              |       |    |               |              |    |               |                   |
| 1   | Yes                                                                                                                                    |                                                                                                                                  |                                                                                                                                                                                                                                                                                                                                                                                                                                                                                               |   |              |            |    |              |              |    |                   |                 |   |              |                       |   |              |       |    |               |              |    |               |                   |
| 0   | No                                                                                                                                     |                                                                                                                                  |                                                                                                                                                                                                                                                                                                                                                                                                                                                                                               |   |              |            |    |              |              |    |                   |                 |   |              |                       |   |              |       |    |               |              |    |               |                   |
| 99  | Doesn't know                                                                                                                           |                                                                                                                                  |                                                                                                                                                                                                                                                                                                                                                                                                                                                                                               |   |              |            |    |              |              |    |                   |                 |   |              |                       |   |              |       |    |               |              |    |               |                   |
| 88  | Refused to answer                                                                                                                      |                                                                                                                                  |                                                                                                                                                                                                                                                                                                                                                                                                                                                                                               |   |              |            |    |              |              |    |                   |                 |   |              |                       |   |              |       |    |               |              |    |               |                   |
| 536 | [id10422_m]<br>Show the field ONLY if:<br>[id10418_m]='1'                                                                              | Did she receive (or need) treatment/food through a tube passed through the nose?                                                 | radio<br><table border="1"> <tr><td>1</td><td>Yes</td></tr> <tr><td>0</td><td>No</td></tr> <tr><td>99</td><td>Doesn't know</td></tr> <tr><td>88</td><td>Refused to answer</td></tr> </table>                                                                                                                                                                                                                                                                                                  | 1 | Yes          | 0          | No | 99           | Doesn't know | 88 | Refused to answer |                 |   |              |                       |   |              |       |    |               |              |    |               |                   |
| 1   | Yes                                                                                                                                    |                                                                                                                                  |                                                                                                                                                                                                                                                                                                                                                                                                                                                                                               |   |              |            |    |              |              |    |                   |                 |   |              |                       |   |              |       |    |               |              |    |               |                   |
| 0   | No                                                                                                                                     |                                                                                                                                  |                                                                                                                                                                                                                                                                                                                                                                                                                                                                                               |   |              |            |    |              |              |    |                   |                 |   |              |                       |   |              |       |    |               |              |    |               |                   |
| 99  | Doesn't know                                                                                                                           |                                                                                                                                  |                                                                                                                                                                                                                                                                                                                                                                                                                                                                                               |   |              |            |    |              |              |    |                   |                 |   |              |                       |   |              |       |    |               |              |    |               |                   |
| 88  | Refused to answer                                                                                                                      |                                                                                                                                  |                                                                                                                                                                                                                                                                                                                                                                                                                                                                                               |   |              |            |    |              |              |    |                   |                 |   |              |                       |   |              |       |    |               |              |    |               |                   |



|     |                                                                               |                                                                                  |                                                                                                                                                                                                                                                                                                                                                                                                                                                                                                                                                                                                                                                                                                                                                                                                                                                                                                                                                                                                                      |   |              |                    |    |              |              |    |                   |                  |   |              |                     |   |              |                                    |   |              |                  |   |              |                                                            |   |              |                         |   |              |                   |    |               |                                      |    |               |          |    |               |              |    |               |                   |
|-----|-------------------------------------------------------------------------------|----------------------------------------------------------------------------------|----------------------------------------------------------------------------------------------------------------------------------------------------------------------------------------------------------------------------------------------------------------------------------------------------------------------------------------------------------------------------------------------------------------------------------------------------------------------------------------------------------------------------------------------------------------------------------------------------------------------------------------------------------------------------------------------------------------------------------------------------------------------------------------------------------------------------------------------------------------------------------------------------------------------------------------------------------------------------------------------------------------------|---|--------------|--------------------|----|--------------|--------------|----|-------------------|------------------|---|--------------|---------------------|---|--------------|------------------------------------|---|--------------|------------------|---|--------------|------------------------------------------------------------|---|--------------|-------------------------|---|--------------|-------------------|----|---------------|--------------------------------------|----|---------------|----------|----|---------------|--------------|----|---------------|-------------------|
| 537 | [id10423_m]<br>Show the field ONLY if:<br>[id10418_m]='1'                     | Did she receive (or need) injectable antibiotics?                                | radio<br><table border="1"> <tr><td>1</td><td>Yes</td></tr> <tr><td>0</td><td>No</td></tr> <tr><td>99</td><td>Doesn't know</td></tr> <tr><td>88</td><td>Refused to answer</td></tr> </table>                                                                                                                                                                                                                                                                                                                                                                                                                                                                                                                                                                                                                                                                                                                                                                                                                         | 1 | Yes          | 0                  | No | 99           | Doesn't know | 88 | Refused to answer |                  |   |              |                     |   |              |                                    |   |              |                  |   |              |                                                            |   |              |                         |   |              |                   |    |               |                                      |    |               |          |    |               |              |    |               |                   |
| 1   | Yes                                                                           |                                                                                  |                                                                                                                                                                                                                                                                                                                                                                                                                                                                                                                                                                                                                                                                                                                                                                                                                                                                                                                                                                                                                      |   |              |                    |    |              |              |    |                   |                  |   |              |                     |   |              |                                    |   |              |                  |   |              |                                                            |   |              |                         |   |              |                   |    |               |                                      |    |               |          |    |               |              |    |               |                   |
| 0   | No                                                                            |                                                                                  |                                                                                                                                                                                                                                                                                                                                                                                                                                                                                                                                                                                                                                                                                                                                                                                                                                                                                                                                                                                                                      |   |              |                    |    |              |              |    |                   |                  |   |              |                     |   |              |                                    |   |              |                  |   |              |                                                            |   |              |                         |   |              |                   |    |               |                                      |    |               |          |    |               |              |    |               |                   |
| 99  | Doesn't know                                                                  |                                                                                  |                                                                                                                                                                                                                                                                                                                                                                                                                                                                                                                                                                                                                                                                                                                                                                                                                                                                                                                                                                                                                      |   |              |                    |    |              |              |    |                   |                  |   |              |                     |   |              |                                    |   |              |                  |   |              |                                                            |   |              |                         |   |              |                   |    |               |                                      |    |               |          |    |               |              |    |               |                   |
| 88  | Refused to answer                                                             |                                                                                  |                                                                                                                                                                                                                                                                                                                                                                                                                                                                                                                                                                                                                                                                                                                                                                                                                                                                                                                                                                                                                      |   |              |                    |    |              |              |    |                   |                  |   |              |                     |   |              |                                    |   |              |                  |   |              |                                                            |   |              |                         |   |              |                   |    |               |                                      |    |               |          |    |               |              |    |               |                   |
| 538 | [id10424_m]<br>Show the field ONLY if:<br>[id10418_m]='1'                     | Did she receive (or need) antiretroviral therapy (ART)?                          | radio<br><table border="1"> <tr><td>1</td><td>Yes</td></tr> <tr><td>0</td><td>No</td></tr> <tr><td>99</td><td>Doesn't know</td></tr> <tr><td>88</td><td>Refused to answer</td></tr> </table>                                                                                                                                                                                                                                                                                                                                                                                                                                                                                                                                                                                                                                                                                                                                                                                                                         | 1 | Yes          | 0                  | No | 99           | Doesn't know | 88 | Refused to answer |                  |   |              |                     |   |              |                                    |   |              |                  |   |              |                                                            |   |              |                         |   |              |                   |    |               |                                      |    |               |          |    |               |              |    |               |                   |
| 1   | Yes                                                                           |                                                                                  |                                                                                                                                                                                                                                                                                                                                                                                                                                                                                                                                                                                                                                                                                                                                                                                                                                                                                                                                                                                                                      |   |              |                    |    |              |              |    |                   |                  |   |              |                     |   |              |                                    |   |              |                  |   |              |                                                            |   |              |                         |   |              |                   |    |               |                                      |    |               |          |    |               |              |    |               |                   |
| 0   | No                                                                            |                                                                                  |                                                                                                                                                                                                                                                                                                                                                                                                                                                                                                                                                                                                                                                                                                                                                                                                                                                                                                                                                                                                                      |   |              |                    |    |              |              |    |                   |                  |   |              |                     |   |              |                                    |   |              |                  |   |              |                                                            |   |              |                         |   |              |                   |    |               |                                      |    |               |          |    |               |              |    |               |                   |
| 99  | Doesn't know                                                                  |                                                                                  |                                                                                                                                                                                                                                                                                                                                                                                                                                                                                                                                                                                                                                                                                                                                                                                                                                                                                                                                                                                                                      |   |              |                    |    |              |              |    |                   |                  |   |              |                     |   |              |                                    |   |              |                  |   |              |                                                            |   |              |                         |   |              |                   |    |               |                                      |    |               |          |    |               |              |    |               |                   |
| 88  | Refused to answer                                                             |                                                                                  |                                                                                                                                                                                                                                                                                                                                                                                                                                                                                                                                                                                                                                                                                                                                                                                                                                                                                                                                                                                                                      |   |              |                    |    |              |              |    |                   |                  |   |              |                     |   |              |                                    |   |              |                  |   |              |                                                            |   |              |                         |   |              |                   |    |               |                                      |    |               |          |    |               |              |    |               |                   |
| 539 | [id10425_m]<br>Show the field ONLY if:<br>[id10418_m]='1'                     | Did she have (or need) an operation for the illness?                             | radio<br><table border="1"> <tr><td>1</td><td>Yes</td></tr> <tr><td>0</td><td>No</td></tr> <tr><td>99</td><td>Doesn't know</td></tr> <tr><td>88</td><td>Refused to answer</td></tr> </table>                                                                                                                                                                                                                                                                                                                                                                                                                                                                                                                                                                                                                                                                                                                                                                                                                         | 1 | Yes          | 0                  | No | 99           | Doesn't know | 88 | Refused to answer |                  |   |              |                     |   |              |                                    |   |              |                  |   |              |                                                            |   |              |                         |   |              |                   |    |               |                                      |    |               |          |    |               |              |    |               |                   |
| 1   | Yes                                                                           |                                                                                  |                                                                                                                                                                                                                                                                                                                                                                                                                                                                                                                                                                                                                                                                                                                                                                                                                                                                                                                                                                                                                      |   |              |                    |    |              |              |    |                   |                  |   |              |                     |   |              |                                    |   |              |                  |   |              |                                                            |   |              |                         |   |              |                   |    |               |                                      |    |               |          |    |               |              |    |               |                   |
| 0   | No                                                                            |                                                                                  |                                                                                                                                                                                                                                                                                                                                                                                                                                                                                                                                                                                                                                                                                                                                                                                                                                                                                                                                                                                                                      |   |              |                    |    |              |              |    |                   |                  |   |              |                     |   |              |                                    |   |              |                  |   |              |                                                            |   |              |                         |   |              |                   |    |               |                                      |    |               |          |    |               |              |    |               |                   |
| 99  | Doesn't know                                                                  |                                                                                  |                                                                                                                                                                                                                                                                                                                                                                                                                                                                                                                                                                                                                                                                                                                                                                                                                                                                                                                                                                                                                      |   |              |                    |    |              |              |    |                   |                  |   |              |                     |   |              |                                    |   |              |                  |   |              |                                                            |   |              |                         |   |              |                   |    |               |                                      |    |               |          |    |               |              |    |               |                   |
| 88  | Refused to answer                                                             |                                                                                  |                                                                                                                                                                                                                                                                                                                                                                                                                                                                                                                                                                                                                                                                                                                                                                                                                                                                                                                                                                                                                      |   |              |                    |    |              |              |    |                   |                  |   |              |                     |   |              |                                    |   |              |                  |   |              |                                                            |   |              |                         |   |              |                   |    |               |                                      |    |               |          |    |               |              |    |               |                   |
| 540 | [id10426_m]<br>Show the field ONLY if:<br>[id10418_m]='1' and [id10425_m]='1' | Did she have the operation within 1 month before death?                          | radio<br><table border="1"> <tr><td>1</td><td>Yes</td></tr> <tr><td>0</td><td>No</td></tr> <tr><td>99</td><td>Doesn't know</td></tr> <tr><td>88</td><td>Refused to answer</td></tr> </table>                                                                                                                                                                                                                                                                                                                                                                                                                                                                                                                                                                                                                                                                                                                                                                                                                         | 1 | Yes          | 0                  | No | 99           | Doesn't know | 88 | Refused to answer |                  |   |              |                     |   |              |                                    |   |              |                  |   |              |                                                            |   |              |                         |   |              |                   |    |               |                                      |    |               |          |    |               |              |    |               |                   |
| 1   | Yes                                                                           |                                                                                  |                                                                                                                                                                                                                                                                                                                                                                                                                                                                                                                                                                                                                                                                                                                                                                                                                                                                                                                                                                                                                      |   |              |                    |    |              |              |    |                   |                  |   |              |                     |   |              |                                    |   |              |                  |   |              |                                                            |   |              |                         |   |              |                   |    |               |                                      |    |               |          |    |               |              |    |               |                   |
| 0   | No                                                                            |                                                                                  |                                                                                                                                                                                                                                                                                                                                                                                                                                                                                                                                                                                                                                                                                                                                                                                                                                                                                                                                                                                                                      |   |              |                    |    |              |              |    |                   |                  |   |              |                     |   |              |                                    |   |              |                  |   |              |                                                            |   |              |                         |   |              |                   |    |               |                                      |    |               |          |    |               |              |    |               |                   |
| 99  | Doesn't know                                                                  |                                                                                  |                                                                                                                                                                                                                                                                                                                                                                                                                                                                                                                                                                                                                                                                                                                                                                                                                                                                                                                                                                                                                      |   |              |                    |    |              |              |    |                   |                  |   |              |                     |   |              |                                    |   |              |                  |   |              |                                                            |   |              |                         |   |              |                   |    |               |                                      |    |               |          |    |               |              |    |               |                   |
| 88  | Refused to answer                                                             |                                                                                  |                                                                                                                                                                                                                                                                                                                                                                                                                                                                                                                                                                                                                                                                                                                                                                                                                                                                                                                                                                                                                      |   |              |                    |    |              |              |    |                   |                  |   |              |                     |   |              |                                    |   |              |                  |   |              |                                                            |   |              |                         |   |              |                   |    |               |                                      |    |               |          |    |               |              |    |               |                   |
| 541 | [id10427_m]<br>Show the field ONLY if:<br>[id10418_m]='1'                     | Was she discharged from hospital very ill?                                       | radio<br><table border="1"> <tr><td>1</td><td>Yes</td></tr> <tr><td>0</td><td>No</td></tr> <tr><td>99</td><td>Doesn't know</td></tr> <tr><td>88</td><td>Refused to answer</td></tr> </table>                                                                                                                                                                                                                                                                                                                                                                                                                                                                                                                                                                                                                                                                                                                                                                                                                         | 1 | Yes          | 0                  | No | 99           | Doesn't know | 88 | Refused to answer |                  |   |              |                     |   |              |                                    |   |              |                  |   |              |                                                            |   |              |                         |   |              |                   |    |               |                                      |    |               |          |    |               |              |    |               |                   |
| 1   | Yes                                                                           |                                                                                  |                                                                                                                                                                                                                                                                                                                                                                                                                                                                                                                                                                                                                                                                                                                                                                                                                                                                                                                                                                                                                      |   |              |                    |    |              |              |    |                   |                  |   |              |                     |   |              |                                    |   |              |                  |   |              |                                                            |   |              |                         |   |              |                   |    |               |                                      |    |               |          |    |               |              |    |               |                   |
| 0   | No                                                                            |                                                                                  |                                                                                                                                                                                                                                                                                                                                                                                                                                                                                                                                                                                                                                                                                                                                                                                                                                                                                                                                                                                                                      |   |              |                    |    |              |              |    |                   |                  |   |              |                     |   |              |                                    |   |              |                  |   |              |                                                            |   |              |                         |   |              |                   |    |               |                                      |    |               |          |    |               |              |    |               |                   |
| 99  | Doesn't know                                                                  |                                                                                  |                                                                                                                                                                                                                                                                                                                                                                                                                                                                                                                                                                                                                                                                                                                                                                                                                                                                                                                                                                                                                      |   |              |                    |    |              |              |    |                   |                  |   |              |                     |   |              |                                    |   |              |                  |   |              |                                                            |   |              |                         |   |              |                   |    |               |                                      |    |               |          |    |               |              |    |               |                   |
| 88  | Refused to answer                                                             |                                                                                  |                                                                                                                                                                                                                                                                                                                                                                                                                                                                                                                                                                                                                                                                                                                                                                                                                                                                                                                                                                                                                      |   |              |                    |    |              |              |    |                   |                  |   |              |                     |   |              |                                    |   |              |                  |   |              |                                                            |   |              |                         |   |              |                   |    |               |                                      |    |               |          |    |               |              |    |               |                   |
| 542 | [id10432_m]                                                                   | Was care sought outside the home while she had this illness (that led to death)? | radio<br><table border="1"> <tr><td>1</td><td>Yes</td></tr> <tr><td>0</td><td>No</td></tr> <tr><td>99</td><td>Doesn't know</td></tr> <tr><td>88</td><td>Refused to answer</td></tr> </table>                                                                                                                                                                                                                                                                                                                                                                                                                                                                                                                                                                                                                                                                                                                                                                                                                         | 1 | Yes          | 0                  | No | 99           | Doesn't know | 88 | Refused to answer |                  |   |              |                     |   |              |                                    |   |              |                  |   |              |                                                            |   |              |                         |   |              |                   |    |               |                                      |    |               |          |    |               |              |    |               |                   |
| 1   | Yes                                                                           |                                                                                  |                                                                                                                                                                                                                                                                                                                                                                                                                                                                                                                                                                                                                                                                                                                                                                                                                                                                                                                                                                                                                      |   |              |                    |    |              |              |    |                   |                  |   |              |                     |   |              |                                    |   |              |                  |   |              |                                                            |   |              |                         |   |              |                   |    |               |                                      |    |               |          |    |               |              |    |               |                   |
| 0   | No                                                                            |                                                                                  |                                                                                                                                                                                                                                                                                                                                                                                                                                                                                                                                                                                                                                                                                                                                                                                                                                                                                                                                                                                                                      |   |              |                    |    |              |              |    |                   |                  |   |              |                     |   |              |                                    |   |              |                  |   |              |                                                            |   |              |                         |   |              |                   |    |               |                                      |    |               |          |    |               |              |    |               |                   |
| 99  | Doesn't know                                                                  |                                                                                  |                                                                                                                                                                                                                                                                                                                                                                                                                                                                                                                                                                                                                                                                                                                                                                                                                                                                                                                                                                                                                      |   |              |                    |    |              |              |    |                   |                  |   |              |                     |   |              |                                    |   |              |                  |   |              |                                                            |   |              |                         |   |              |                   |    |               |                                      |    |               |          |    |               |              |    |               |                   |
| 88  | Refused to answer                                                             |                                                                                  |                                                                                                                                                                                                                                                                                                                                                                                                                                                                                                                                                                                                                                                                                                                                                                                                                                                                                                                                                                                                                      |   |              |                    |    |              |              |    |                   |                  |   |              |                     |   |              |                                    |   |              |                  |   |              |                                                            |   |              |                         |   |              |                   |    |               |                                      |    |               |          |    |               |              |    |               |                   |
| 543 | [id10433_m]<br>Show the field ONLY if:<br>[id10432_m]='1'                     | Where or from whom did they seek care?                                           | checkbox<br><table border="1"> <tr><td>1</td><td>id10433_m__1</td><td>Traditional healer</td></tr> <tr><td>2</td><td>id10433_m__2</td><td>Homeopath</td></tr> <tr><td>3</td><td>id10433_m__3</td><td>Religious leader</td></tr> <tr><td>4</td><td>id10433_m__4</td><td>Government hospital</td></tr> <tr><td>5</td><td>id10433_m__5</td><td>Government health center or clinic</td></tr> <tr><td>6</td><td>id10433_m__6</td><td>Private hospital</td></tr> <tr><td>7</td><td>id10433_m__7</td><td>Community-based practitioner associated with health system</td></tr> <tr><td>8</td><td>id10433_m__8</td><td>Trained birth attendant</td></tr> <tr><td>9</td><td>id10433_m__9</td><td>Private physician</td></tr> <tr><td>10</td><td>id10433_m__10</td><td>Relative, friend (outside household)</td></tr> <tr><td>11</td><td>id10433_m__11</td><td>Pharmacy</td></tr> <tr><td>99</td><td>id10433_m__99</td><td>Doesn't know</td></tr> <tr><td>88</td><td>id10433_m__88</td><td>Refused to answer</td></tr> </table> | 1 | id10433_m__1 | Traditional healer | 2  | id10433_m__2 | Homeopath    | 3  | id10433_m__3      | Religious leader | 4 | id10433_m__4 | Government hospital | 5 | id10433_m__5 | Government health center or clinic | 6 | id10433_m__6 | Private hospital | 7 | id10433_m__7 | Community-based practitioner associated with health system | 8 | id10433_m__8 | Trained birth attendant | 9 | id10433_m__9 | Private physician | 10 | id10433_m__10 | Relative, friend (outside household) | 11 | id10433_m__11 | Pharmacy | 99 | id10433_m__99 | Doesn't know | 88 | id10433_m__88 | Refused to answer |
| 1   | id10433_m__1                                                                  | Traditional healer                                                               |                                                                                                                                                                                                                                                                                                                                                                                                                                                                                                                                                                                                                                                                                                                                                                                                                                                                                                                                                                                                                      |   |              |                    |    |              |              |    |                   |                  |   |              |                     |   |              |                                    |   |              |                  |   |              |                                                            |   |              |                         |   |              |                   |    |               |                                      |    |               |          |    |               |              |    |               |                   |
| 2   | id10433_m__2                                                                  | Homeopath                                                                        |                                                                                                                                                                                                                                                                                                                                                                                                                                                                                                                                                                                                                                                                                                                                                                                                                                                                                                                                                                                                                      |   |              |                    |    |              |              |    |                   |                  |   |              |                     |   |              |                                    |   |              |                  |   |              |                                                            |   |              |                         |   |              |                   |    |               |                                      |    |               |          |    |               |              |    |               |                   |
| 3   | id10433_m__3                                                                  | Religious leader                                                                 |                                                                                                                                                                                                                                                                                                                                                                                                                                                                                                                                                                                                                                                                                                                                                                                                                                                                                                                                                                                                                      |   |              |                    |    |              |              |    |                   |                  |   |              |                     |   |              |                                    |   |              |                  |   |              |                                                            |   |              |                         |   |              |                   |    |               |                                      |    |               |          |    |               |              |    |               |                   |
| 4   | id10433_m__4                                                                  | Government hospital                                                              |                                                                                                                                                                                                                                                                                                                                                                                                                                                                                                                                                                                                                                                                                                                                                                                                                                                                                                                                                                                                                      |   |              |                    |    |              |              |    |                   |                  |   |              |                     |   |              |                                    |   |              |                  |   |              |                                                            |   |              |                         |   |              |                   |    |               |                                      |    |               |          |    |               |              |    |               |                   |
| 5   | id10433_m__5                                                                  | Government health center or clinic                                               |                                                                                                                                                                                                                                                                                                                                                                                                                                                                                                                                                                                                                                                                                                                                                                                                                                                                                                                                                                                                                      |   |              |                    |    |              |              |    |                   |                  |   |              |                     |   |              |                                    |   |              |                  |   |              |                                                            |   |              |                         |   |              |                   |    |               |                                      |    |               |          |    |               |              |    |               |                   |
| 6   | id10433_m__6                                                                  | Private hospital                                                                 |                                                                                                                                                                                                                                                                                                                                                                                                                                                                                                                                                                                                                                                                                                                                                                                                                                                                                                                                                                                                                      |   |              |                    |    |              |              |    |                   |                  |   |              |                     |   |              |                                    |   |              |                  |   |              |                                                            |   |              |                         |   |              |                   |    |               |                                      |    |               |          |    |               |              |    |               |                   |
| 7   | id10433_m__7                                                                  | Community-based practitioner associated with health system                       |                                                                                                                                                                                                                                                                                                                                                                                                                                                                                                                                                                                                                                                                                                                                                                                                                                                                                                                                                                                                                      |   |              |                    |    |              |              |    |                   |                  |   |              |                     |   |              |                                    |   |              |                  |   |              |                                                            |   |              |                         |   |              |                   |    |               |                                      |    |               |          |    |               |              |    |               |                   |
| 8   | id10433_m__8                                                                  | Trained birth attendant                                                          |                                                                                                                                                                                                                                                                                                                                                                                                                                                                                                                                                                                                                                                                                                                                                                                                                                                                                                                                                                                                                      |   |              |                    |    |              |              |    |                   |                  |   |              |                     |   |              |                                    |   |              |                  |   |              |                                                            |   |              |                         |   |              |                   |    |               |                                      |    |               |          |    |               |              |    |               |                   |
| 9   | id10433_m__9                                                                  | Private physician                                                                |                                                                                                                                                                                                                                                                                                                                                                                                                                                                                                                                                                                                                                                                                                                                                                                                                                                                                                                                                                                                                      |   |              |                    |    |              |              |    |                   |                  |   |              |                     |   |              |                                    |   |              |                  |   |              |                                                            |   |              |                         |   |              |                   |    |               |                                      |    |               |          |    |               |              |    |               |                   |
| 10  | id10433_m__10                                                                 | Relative, friend (outside household)                                             |                                                                                                                                                                                                                                                                                                                                                                                                                                                                                                                                                                                                                                                                                                                                                                                                                                                                                                                                                                                                                      |   |              |                    |    |              |              |    |                   |                  |   |              |                     |   |              |                                    |   |              |                  |   |              |                                                            |   |              |                         |   |              |                   |    |               |                                      |    |               |          |    |               |              |    |               |                   |
| 11  | id10433_m__11                                                                 | Pharmacy                                                                         |                                                                                                                                                                                                                                                                                                                                                                                                                                                                                                                                                                                                                                                                                                                                                                                                                                                                                                                                                                                                                      |   |              |                    |    |              |              |    |                   |                  |   |              |                     |   |              |                                    |   |              |                  |   |              |                                                            |   |              |                         |   |              |                   |    |               |                                      |    |               |          |    |               |              |    |               |                   |
| 99  | id10433_m__99                                                                 | Doesn't know                                                                     |                                                                                                                                                                                                                                                                                                                                                                                                                                                                                                                                                                                                                                                                                                                                                                                                                                                                                                                                                                                                                      |   |              |                    |    |              |              |    |                   |                  |   |              |                     |   |              |                                    |   |              |                  |   |              |                                                            |   |              |                         |   |              |                   |    |               |                                      |    |               |          |    |               |              |    |               |                   |
| 88  | id10433_m__88                                                                 | Refused to answer                                                                |                                                                                                                                                                                                                                                                                                                                                                                                                                                                                                                                                                                                                                                                                                                                                                                                                                                                                                                                                                                                                      |   |              |                    |    |              |              |    |                   |                  |   |              |                     |   |              |                                    |   |              |                  |   |              |                                                            |   |              |                         |   |              |                   |    |               |                                      |    |               |          |    |               |              |    |               |                   |

|     |                                                                                                                                                                                                                                                                                                                                        |                                                                                                                              |                                                                                                                                                                                                                           |   |     |   |    |    |              |    |                   |
|-----|----------------------------------------------------------------------------------------------------------------------------------------------------------------------------------------------------------------------------------------------------------------------------------------------------------------------------------------|------------------------------------------------------------------------------------------------------------------------------|---------------------------------------------------------------------------------------------------------------------------------------------------------------------------------------------------------------------------|---|-----|---|----|----|--------------|----|-------------------|
| 544 | [id10433_check_m]<br>Show the field ONLY if:<br>([id10433_m(1)]=1' or [id10433_m(2)]=1' or [id10433_m(3)]=1' or [id10433_m(4)]=1' or [id10433_m(5)]=1' or [id10433_m(6)]=1' or [id10433_m(7)]=1' or [id10433_m(8)]=1' or [id10433_m(9)]=1' or [id10433_m(10)]=1' or [id10433_m(11)]=1') and ([id10433_m(99)]=1' or [id10433_m(88)]=1') | It is not possible to select "Don't know" or "Refuse" together with other options. Please go back and correct the selection. | descriptive                                                                                                                                                                                                               |   |     |   |    |    |              |    |                   |
| 545 | [id10435_m]                                                                                                                                                                                                                                                                                                                            | Did a health care worker tell you the cause of death?                                                                        | radio<br><table border="1"> <tr><td>1</td><td>Yes</td></tr> <tr><td>0</td><td>No</td></tr> <tr><td>99</td><td>Doesn't know</td></tr> <tr><td>88</td><td>Refused to answer</td></tr> </table>                              | 1 | Yes | 0 | No | 99 | Doesn't know | 88 | Refused to answer |
| 1   | Yes                                                                                                                                                                                                                                                                                                                                    |                                                                                                                              |                                                                                                                                                                                                                           |   |     |   |    |    |              |    |                   |
| 0   | No                                                                                                                                                                                                                                                                                                                                     |                                                                                                                              |                                                                                                                                                                                                                           |   |     |   |    |    |              |    |                   |
| 99  | Doesn't know                                                                                                                                                                                                                                                                                                                           |                                                                                                                              |                                                                                                                                                                                                                           |   |     |   |    |    |              |    |                   |
| 88  | Refused to answer                                                                                                                                                                                                                                                                                                                      |                                                                                                                              |                                                                                                                                                                                                                           |   |     |   |    |    |              |    |                   |
| 546 | [id10436_m]<br>Show the field ONLY if:<br>[id10435_m]=1'                                                                                                                                                                                                                                                                               | What did the health care worker say?                                                                                         | text                                                                                                                                                                                                                      |   |     |   |    |    |              |    |                   |
| 547 | [id10437_m]<br>Show the field ONLY if:<br>[id10432_m]=1'                                                                                                                                                                                                                                                                               | Do you have any health records that belonged to the deceased?                                                                | radio<br><table border="1"> <tr><td>1</td><td>Yes</td></tr> <tr><td>0</td><td>No</td></tr> <tr><td>99</td><td>Doesn't know</td></tr> <tr><td>88</td><td>Refused to answer</td></tr> </table><br>Field Annotation: @HIDDEN | 1 | Yes | 0 | No | 99 | Doesn't know | 88 | Refused to answer |
| 1   | Yes                                                                                                                                                                                                                                                                                                                                    |                                                                                                                              |                                                                                                                                                                                                                           |   |     |   |    |    |              |    |                   |
| 0   | No                                                                                                                                                                                                                                                                                                                                     |                                                                                                                              |                                                                                                                                                                                                                           |   |     |   |    |    |              |    |                   |
| 99  | Doesn't know                                                                                                                                                                                                                                                                                                                           |                                                                                                                              |                                                                                                                                                                                                                           |   |     |   |    |    |              |    |                   |
| 88  | Refused to answer                                                                                                                                                                                                                                                                                                                      |                                                                                                                              |                                                                                                                                                                                                                           |   |     |   |    |    |              |    |                   |
| 548 | [id10438_m]<br>Show the field ONLY if:<br>[id10437_m]=1'                                                                                                                                                                                                                                                                               | Can I see the health records?                                                                                                | radio<br><table border="1"> <tr><td>1</td><td>Yes</td></tr> <tr><td>0</td><td>No</td></tr> <tr><td>99</td><td>Doesn't know</td></tr> <tr><td>88</td><td>Refused to answer</td></tr> </table><br>Field Annotation: @HIDDEN | 1 | Yes | 0 | No | 99 | Doesn't know | 88 | Refused to answer |
| 1   | Yes                                                                                                                                                                                                                                                                                                                                    |                                                                                                                              |                                                                                                                                                                                                                           |   |     |   |    |    |              |    |                   |
| 0   | No                                                                                                                                                                                                                                                                                                                                     |                                                                                                                              |                                                                                                                                                                                                                           |   |     |   |    |    |              |    |                   |
| 99  | Doesn't know                                                                                                                                                                                                                                                                                                                           |                                                                                                                              |                                                                                                                                                                                                                           |   |     |   |    |    |              |    |                   |
| 88  | Refused to answer                                                                                                                                                                                                                                                                                                                      |                                                                                                                              |                                                                                                                                                                                                                           |   |     |   |    |    |              |    |                   |
| 549 | [id10439_check_m]<br>Show the field ONLY if:<br>[id10438_m]=1'                                                                                                                                                                                                                                                                         | [Is the date of the most recent (last) visit available?]                                                                     | radio<br><table border="1"> <tr><td>1</td><td>Yes</td></tr> <tr><td>0</td><td>No</td></tr> </table><br>Field Annotation: @HIDDEN                                                                                          | 1 | Yes | 0 | No |    |              |    |                   |
| 1   | Yes                                                                                                                                                                                                                                                                                                                                    |                                                                                                                              |                                                                                                                                                                                                                           |   |     |   |    |    |              |    |                   |
| 0   | No                                                                                                                                                                                                                                                                                                                                     |                                                                                                                              |                                                                                                                                                                                                                           |   |     |   |    |    |              |    |                   |
| 550 | [id10439_m]<br>Show the field ONLY if:<br>[id10439_check_m]=1'                                                                                                                                                                                                                                                                         | [Record the date of the most recent (last) visit]                                                                            | text (date_dmy)<br>Field Annotation: @HIDDEN                                                                                                                                                                              |   |     |   |    |    |              |    |                   |
| 551 | [id10440_check_m]<br>Show the field ONLY if:<br>[id10438_m]=1'                                                                                                                                                                                                                                                                         | [Is the date of the second most recent visit available?]                                                                     | radio<br><table border="1"> <tr><td>1</td><td>Yes</td></tr> <tr><td>0</td><td>No</td></tr> </table><br>Field Annotation: @HIDDEN                                                                                          | 1 | Yes | 0 | No |    |              |    |                   |
| 1   | Yes                                                                                                                                                                                                                                                                                                                                    |                                                                                                                              |                                                                                                                                                                                                                           |   |     |   |    |    |              |    |                   |
| 0   | No                                                                                                                                                                                                                                                                                                                                     |                                                                                                                              |                                                                                                                                                                                                                           |   |     |   |    |    |              |    |                   |
| 552 | [id10440_m]<br>Show the field ONLY if:<br>[id10440_check_m]=1'                                                                                                                                                                                                                                                                         | [Record the date of the second most recent visit]                                                                            | text (date_dmy)<br>Field Annotation: @HIDDEN                                                                                                                                                                              |   |     |   |    |    |              |    |                   |
| 553 | [id10441_check_m]<br>Show the field ONLY if:<br>[id10438_m]=1'                                                                                                                                                                                                                                                                         | [Is the date of the last note on the health records available?]                                                              | radio<br><table border="1"> <tr><td>1</td><td>Yes</td></tr> <tr><td>0</td><td>No</td></tr> </table><br>Field Annotation: @HIDDEN                                                                                          | 1 | Yes | 0 | No |    |              |    |                   |
| 1   | Yes                                                                                                                                                                                                                                                                                                                                    |                                                                                                                              |                                                                                                                                                                                                                           |   |     |   |    |    |              |    |                   |
| 0   | No                                                                                                                                                                                                                                                                                                                                     |                                                                                                                              |                                                                                                                                                                                                                           |   |     |   |    |    |              |    |                   |

|     |                                                                 |                                                                                                                                                                     |                                                                                                                                                                                              |   |     |   |    |    |              |    |                   |
|-----|-----------------------------------------------------------------|---------------------------------------------------------------------------------------------------------------------------------------------------------------------|----------------------------------------------------------------------------------------------------------------------------------------------------------------------------------------------|---|-----|---|----|----|--------------|----|-------------------|
| 554 | [id10441_m]<br>Show the field ONLY if:<br>[id10441_check_m]='1' | [Record the date of the last note on the health records]                                                                                                            | text (date_dmy)<br>Field Annotation: @HIDDEN                                                                                                                                                 |   |     |   |    |    |              |    |                   |
| 555 | [id10442_m]<br>Show the field ONLY if:<br>[id10438_m]='1'       | [Record the weight (in kilograms) written at the most recent (last) visit]<br><i>(enter e.g. 3.5)</i>                                                               | text<br>Field Annotation: @HIDDEN                                                                                                                                                            |   |     |   |    |    |              |    |                   |
| 556 | [id10443_m]<br>Show the field ONLY if:<br>[id10438_m]='1'       | [Record the weight (in kilograms) written at the second most recent visit]                                                                                          | text<br>Field Annotation: @HIDDEN                                                                                                                                                            |   |     |   |    |    |              |    |                   |
| 557 | [id10444_m]<br>Show the field ONLY if:<br>[id10438_m]='1'       | [Transcribe the last note on the health records]                                                                                                                    | notes<br>Field Annotation: @HIDDEN                                                                                                                                                           |   |     |   |    |    |              |    |                   |
| 558 | [id10450_m]                                                     | Section Header: <i>Background and Context</i><br>In the final days before death, did she travel to a hospital or health facility?                                   | radio<br><table border="1"> <tr><td>1</td><td>Yes</td></tr> <tr><td>0</td><td>No</td></tr> <tr><td>99</td><td>Doesn't know</td></tr> <tr><td>88</td><td>Refused to answer</td></tr> </table> | 1 | Yes | 0 | No | 99 | Doesn't know | 88 | Refused to answer |
| 1   | Yes                                                             |                                                                                                                                                                     |                                                                                                                                                                                              |   |     |   |    |    |              |    |                   |
| 0   | No                                                              |                                                                                                                                                                     |                                                                                                                                                                                              |   |     |   |    |    |              |    |                   |
| 99  | Doesn't know                                                    |                                                                                                                                                                     |                                                                                                                                                                                              |   |     |   |    |    |              |    |                   |
| 88  | Refused to answer                                               |                                                                                                                                                                     |                                                                                                                                                                                              |   |     |   |    |    |              |    |                   |
| 559 | [id10451_m]<br>Show the field ONLY if:<br>[id10450_m]='1'       | Did she use motorised transport to get to the hospital or health facility?                                                                                          | radio<br><table border="1"> <tr><td>1</td><td>Yes</td></tr> <tr><td>0</td><td>No</td></tr> <tr><td>99</td><td>Doesn't know</td></tr> <tr><td>88</td><td>Refused to answer</td></tr> </table> | 1 | Yes | 0 | No | 99 | Doesn't know | 88 | Refused to answer |
| 1   | Yes                                                             |                                                                                                                                                                     |                                                                                                                                                                                              |   |     |   |    |    |              |    |                   |
| 0   | No                                                              |                                                                                                                                                                     |                                                                                                                                                                                              |   |     |   |    |    |              |    |                   |
| 99  | Doesn't know                                                    |                                                                                                                                                                     |                                                                                                                                                                                              |   |     |   |    |    |              |    |                   |
| 88  | Refused to answer                                               |                                                                                                                                                                     |                                                                                                                                                                                              |   |     |   |    |    |              |    |                   |
| 560 | [id10452_m]<br>Show the field ONLY if:<br>[id10450_m]='1'       | Were there any problems during admission to the hospital or health facility?                                                                                        | radio<br><table border="1"> <tr><td>1</td><td>Yes</td></tr> <tr><td>0</td><td>No</td></tr> <tr><td>99</td><td>Doesn't know</td></tr> <tr><td>88</td><td>Refused to answer</td></tr> </table> | 1 | Yes | 0 | No | 99 | Doesn't know | 88 | Refused to answer |
| 1   | Yes                                                             |                                                                                                                                                                     |                                                                                                                                                                                              |   |     |   |    |    |              |    |                   |
| 0   | No                                                              |                                                                                                                                                                     |                                                                                                                                                                                              |   |     |   |    |    |              |    |                   |
| 99  | Doesn't know                                                    |                                                                                                                                                                     |                                                                                                                                                                                              |   |     |   |    |    |              |    |                   |
| 88  | Refused to answer                                               |                                                                                                                                                                     |                                                                                                                                                                                              |   |     |   |    |    |              |    |                   |
| 561 | [id10453_m]<br>Show the field ONLY if:<br>[id10450_m]='1'       | Were there any problems with the way she was treated (medical treatment, procedures, interpersonal attitudes, respect, dignity) in the hospital or health facility? | radio<br><table border="1"> <tr><td>1</td><td>Yes</td></tr> <tr><td>0</td><td>No</td></tr> <tr><td>99</td><td>Doesn't know</td></tr> <tr><td>88</td><td>Refused to answer</td></tr> </table> | 1 | Yes | 0 | No | 99 | Doesn't know | 88 | Refused to answer |
| 1   | Yes                                                             |                                                                                                                                                                     |                                                                                                                                                                                              |   |     |   |    |    |              |    |                   |
| 0   | No                                                              |                                                                                                                                                                     |                                                                                                                                                                                              |   |     |   |    |    |              |    |                   |
| 99  | Doesn't know                                                    |                                                                                                                                                                     |                                                                                                                                                                                              |   |     |   |    |    |              |    |                   |
| 88  | Refused to answer                                               |                                                                                                                                                                     |                                                                                                                                                                                              |   |     |   |    |    |              |    |                   |
| 562 | [id10454_m]<br>Show the field ONLY if:<br>[id10450_m]='1'       | Were there any problems getting medications or diagnostic tests in the hospital or health facility?                                                                 | radio<br><table border="1"> <tr><td>1</td><td>Yes</td></tr> <tr><td>0</td><td>No</td></tr> <tr><td>99</td><td>Doesn't know</td></tr> <tr><td>88</td><td>Refused to answer</td></tr> </table> | 1 | Yes | 0 | No | 99 | Doesn't know | 88 | Refused to answer |
| 1   | Yes                                                             |                                                                                                                                                                     |                                                                                                                                                                                              |   |     |   |    |    |              |    |                   |
| 0   | No                                                              |                                                                                                                                                                     |                                                                                                                                                                                              |   |     |   |    |    |              |    |                   |
| 99  | Doesn't know                                                    |                                                                                                                                                                     |                                                                                                                                                                                              |   |     |   |    |    |              |    |                   |
| 88  | Refused to answer                                               |                                                                                                                                                                     |                                                                                                                                                                                              |   |     |   |    |    |              |    |                   |
| 563 | [id10455_m]<br>Show the field ONLY if:<br>[id10450_m]='1'       | Does it take more than 2 hours to get to the nearest hospital or health facility from the deceased's household?                                                     | radio<br><table border="1"> <tr><td>1</td><td>Yes</td></tr> <tr><td>0</td><td>No</td></tr> <tr><td>99</td><td>Doesn't know</td></tr> <tr><td>88</td><td>Refused to answer</td></tr> </table> | 1 | Yes | 0 | No | 99 | Doesn't know | 88 | Refused to answer |
| 1   | Yes                                                             |                                                                                                                                                                     |                                                                                                                                                                                              |   |     |   |    |    |              |    |                   |
| 0   | No                                                              |                                                                                                                                                                     |                                                                                                                                                                                              |   |     |   |    |    |              |    |                   |
| 99  | Doesn't know                                                    |                                                                                                                                                                     |                                                                                                                                                                                              |   |     |   |    |    |              |    |                   |
| 88  | Refused to answer                                               |                                                                                                                                                                     |                                                                                                                                                                                              |   |     |   |    |    |              |    |                   |
| 564 | [id10456_m]                                                     | In the final days before death, were there any doubts about whether medical care was needed?                                                                        | radio<br><table border="1"> <tr><td>1</td><td>Yes</td></tr> <tr><td>0</td><td>No</td></tr> <tr><td>99</td><td>Doesn't know</td></tr> <tr><td>88</td><td>Refused to answer</td></tr> </table> | 1 | Yes | 0 | No | 99 | Doesn't know | 88 | Refused to answer |
| 1   | Yes                                                             |                                                                                                                                                                     |                                                                                                                                                                                              |   |     |   |    |    |              |    |                   |
| 0   | No                                                              |                                                                                                                                                                     |                                                                                                                                                                                              |   |     |   |    |    |              |    |                   |
| 99  | Doesn't know                                                    |                                                                                                                                                                     |                                                                                                                                                                                              |   |     |   |    |    |              |    |                   |
| 88  | Refused to answer                                               |                                                                                                                                                                     |                                                                                                                                                                                              |   |     |   |    |    |              |    |                   |

|                                                                      |                                                                                                                                                                                                                                                                                                                                                                      |                                                                                                                                                               |                                                                                                                                                                                                                                                                                                                                                                                                                                                                                                                                                                                                                                                                                                                                                                                                                                                                                                         |   |              |                        |            |              |              |    |                   |       |   |              |              |   |              |               |   |              |          |   |              |               |   |              |         |   |              |           |    |               |                        |    |               |         |    |               |                                        |    |               |            |
|----------------------------------------------------------------------|----------------------------------------------------------------------------------------------------------------------------------------------------------------------------------------------------------------------------------------------------------------------------------------------------------------------------------------------------------------------|---------------------------------------------------------------------------------------------------------------------------------------------------------------|---------------------------------------------------------------------------------------------------------------------------------------------------------------------------------------------------------------------------------------------------------------------------------------------------------------------------------------------------------------------------------------------------------------------------------------------------------------------------------------------------------------------------------------------------------------------------------------------------------------------------------------------------------------------------------------------------------------------------------------------------------------------------------------------------------------------------------------------------------------------------------------------------------|---|--------------|------------------------|------------|--------------|--------------|----|-------------------|-------|---|--------------|--------------|---|--------------|---------------|---|--------------|----------|---|--------------|---------------|---|--------------|---------|---|--------------|-----------|----|---------------|------------------------|----|---------------|---------|----|---------------|----------------------------------------|----|---------------|------------|
| 565                                                                  | [id10457_m]                                                                                                                                                                                                                                                                                                                                                          | In the final days before death, was traditional medicine used?                                                                                                | radio<br><table border="1"> <tr><td>1</td><td>Yes</td></tr> <tr><td>0</td><td>No</td></tr> <tr><td>99</td><td>Doesn't know</td></tr> <tr><td>88</td><td>Refused to answer</td></tr> </table>                                                                                                                                                                                                                                                                                                                                                                                                                                                                                                                                                                                                                                                                                                            | 1 | Yes          | 0                      | No         | 99           | Doesn't know | 88 | Refused to answer |       |   |              |              |   |              |               |   |              |          |   |              |               |   |              |         |   |              |           |    |               |                        |    |               |         |    |               |                                        |    |               |            |
| 1                                                                    | Yes                                                                                                                                                                                                                                                                                                                                                                  |                                                                                                                                                               |                                                                                                                                                                                                                                                                                                                                                                                                                                                                                                                                                                                                                                                                                                                                                                                                                                                                                                         |   |              |                        |            |              |              |    |                   |       |   |              |              |   |              |               |   |              |          |   |              |               |   |              |         |   |              |           |    |               |                        |    |               |         |    |               |                                        |    |               |            |
| 0                                                                    | No                                                                                                                                                                                                                                                                                                                                                                   |                                                                                                                                                               |                                                                                                                                                                                                                                                                                                                                                                                                                                                                                                                                                                                                                                                                                                                                                                                                                                                                                                         |   |              |                        |            |              |              |    |                   |       |   |              |              |   |              |               |   |              |          |   |              |               |   |              |         |   |              |           |    |               |                        |    |               |         |    |               |                                        |    |               |            |
| 99                                                                   | Doesn't know                                                                                                                                                                                                                                                                                                                                                         |                                                                                                                                                               |                                                                                                                                                                                                                                                                                                                                                                                                                                                                                                                                                                                                                                                                                                                                                                                                                                                                                                         |   |              |                        |            |              |              |    |                   |       |   |              |              |   |              |               |   |              |          |   |              |               |   |              |         |   |              |           |    |               |                        |    |               |         |    |               |                                        |    |               |            |
| 88                                                                   | Refused to answer                                                                                                                                                                                                                                                                                                                                                    |                                                                                                                                                               |                                                                                                                                                                                                                                                                                                                                                                                                                                                                                                                                                                                                                                                                                                                                                                                                                                                                                                         |   |              |                        |            |              |              |    |                   |       |   |              |              |   |              |               |   |              |          |   |              |               |   |              |         |   |              |           |    |               |                        |    |               |         |    |               |                                        |    |               |            |
| 566                                                                  | [id10458_m]                                                                                                                                                                                                                                                                                                                                                          | In the final days before death, did anyone use a telephone or cell phone to call for help?                                                                    | radio<br><table border="1"> <tr><td>1</td><td>Yes</td></tr> <tr><td>0</td><td>No</td></tr> <tr><td>99</td><td>Doesn't know</td></tr> <tr><td>88</td><td>Refused to answer</td></tr> </table>                                                                                                                                                                                                                                                                                                                                                                                                                                                                                                                                                                                                                                                                                                            | 1 | Yes          | 0                      | No         | 99           | Doesn't know | 88 | Refused to answer |       |   |              |              |   |              |               |   |              |          |   |              |               |   |              |         |   |              |           |    |               |                        |    |               |         |    |               |                                        |    |               |            |
| 1                                                                    | Yes                                                                                                                                                                                                                                                                                                                                                                  |                                                                                                                                                               |                                                                                                                                                                                                                                                                                                                                                                                                                                                                                                                                                                                                                                                                                                                                                                                                                                                                                                         |   |              |                        |            |              |              |    |                   |       |   |              |              |   |              |               |   |              |          |   |              |               |   |              |         |   |              |           |    |               |                        |    |               |         |    |               |                                        |    |               |            |
| 0                                                                    | No                                                                                                                                                                                                                                                                                                                                                                   |                                                                                                                                                               |                                                                                                                                                                                                                                                                                                                                                                                                                                                                                                                                                                                                                                                                                                                                                                                                                                                                                                         |   |              |                        |            |              |              |    |                   |       |   |              |              |   |              |               |   |              |          |   |              |               |   |              |         |   |              |           |    |               |                        |    |               |         |    |               |                                        |    |               |            |
| 99                                                                   | Doesn't know                                                                                                                                                                                                                                                                                                                                                         |                                                                                                                                                               |                                                                                                                                                                                                                                                                                                                                                                                                                                                                                                                                                                                                                                                                                                                                                                                                                                                                                                         |   |              |                        |            |              |              |    |                   |       |   |              |              |   |              |               |   |              |          |   |              |               |   |              |         |   |              |           |    |               |                        |    |               |         |    |               |                                        |    |               |            |
| 88                                                                   | Refused to answer                                                                                                                                                                                                                                                                                                                                                    |                                                                                                                                                               |                                                                                                                                                                                                                                                                                                                                                                                                                                                                                                                                                                                                                                                                                                                                                                                                                                                                                                         |   |              |                        |            |              |              |    |                   |       |   |              |              |   |              |               |   |              |          |   |              |               |   |              |         |   |              |           |    |               |                        |    |               |         |    |               |                                        |    |               |            |
| 567                                                                  | [id10459_m]                                                                                                                                                                                                                                                                                                                                                          | Over the course of illness, did the total costs of care and treatment prohibit other household payments?                                                      | radio<br><table border="1"> <tr><td>1</td><td>Yes</td></tr> <tr><td>0</td><td>No</td></tr> <tr><td>99</td><td>Doesn't know</td></tr> <tr><td>88</td><td>Refused to answer</td></tr> </table>                                                                                                                                                                                                                                                                                                                                                                                                                                                                                                                                                                                                                                                                                                            | 1 | Yes          | 0                      | No         | 99           | Doesn't know | 88 | Refused to answer |       |   |              |              |   |              |               |   |              |          |   |              |               |   |              |         |   |              |           |    |               |                        |    |               |         |    |               |                                        |    |               |            |
| 1                                                                    | Yes                                                                                                                                                                                                                                                                                                                                                                  |                                                                                                                                                               |                                                                                                                                                                                                                                                                                                                                                                                                                                                                                                                                                                                                                                                                                                                                                                                                                                                                                                         |   |              |                        |            |              |              |    |                   |       |   |              |              |   |              |               |   |              |          |   |              |               |   |              |         |   |              |           |    |               |                        |    |               |         |    |               |                                        |    |               |            |
| 0                                                                    | No                                                                                                                                                                                                                                                                                                                                                                   |                                                                                                                                                               |                                                                                                                                                                                                                                                                                                                                                                                                                                                                                                                                                                                                                                                                                                                                                                                                                                                                                                         |   |              |                        |            |              |              |    |                   |       |   |              |              |   |              |               |   |              |          |   |              |               |   |              |         |   |              |           |    |               |                        |    |               |         |    |               |                                        |    |               |            |
| 99                                                                   | Doesn't know                                                                                                                                                                                                                                                                                                                                                         |                                                                                                                                                               |                                                                                                                                                                                                                                                                                                                                                                                                                                                                                                                                                                                                                                                                                                                                                                                                                                                                                                         |   |              |                        |            |              |              |    |                   |       |   |              |              |   |              |               |   |              |          |   |              |               |   |              |         |   |              |           |    |               |                        |    |               |         |    |               |                                        |    |               |            |
| 88                                                                   | Refused to answer                                                                                                                                                                                                                                                                                                                                                    |                                                                                                                                                               |                                                                                                                                                                                                                                                                                                                                                                                                                                                                                                                                                                                                                                                                                                                                                                                                                                                                                                         |   |              |                        |            |              |              |    |                   |       |   |              |              |   |              |               |   |              |          |   |              |               |   |              |         |   |              |           |    |               |                        |    |               |         |    |               |                                        |    |               |            |
| 568                                                                  | [id10476_m]                                                                                                                                                                                                                                                                                                                                                          | Section Header: <i>Open Narrative</i><br>Thank you for your information. Now can you please tell me in your own words about the events that led to the death? | notes                                                                                                                                                                                                                                                                                                                                                                                                                                                                                                                                                                                                                                                                                                                                                                                                                                                                                                   |   |              |                        |            |              |              |    |                   |       |   |              |              |   |              |               |   |              |          |   |              |               |   |              |         |   |              |           |    |               |                        |    |               |         |    |               |                                        |    |               |            |
| 569                                                                  | [id10477_m]                                                                                                                                                                                                                                                                                                                                                          | [Select any of the following words that were mentioned as present in the narrative.]                                                                          | checkbox<br><table border="1"> <tr><td>1</td><td>id10477_m__1</td><td>Chronic kidney disease</td></tr> <tr><td>2</td><td>id10477_m__2</td><td>Dialysis</td></tr> <tr><td>3</td><td>id10477_m__3</td><td>Fever</td></tr> <tr><td>4</td><td>id10477_m__4</td><td>Heart attack</td></tr> <tr><td>5</td><td>id10477_m__5</td><td>Heart problem</td></tr> <tr><td>6</td><td>id10477_m__6</td><td>Jaundice</td></tr> <tr><td>7</td><td>id10477_m__7</td><td>Liver failure</td></tr> <tr><td>8</td><td>id10477_m__8</td><td>Malaria</td></tr> <tr><td>9</td><td>id10477_m__9</td><td>Pneumonia</td></tr> <tr><td>10</td><td>id10477_m__10</td><td>Renal (kidney) failure</td></tr> <tr><td>11</td><td>id10477_m__11</td><td>Suicide</td></tr> <tr><td>12</td><td>id10477_m__12</td><td>None of the above words were mentioned</td></tr> <tr><td>99</td><td>id10477_m__99</td><td>Don't know</td></tr> </table> | 1 | id10477_m__1 | Chronic kidney disease | 2          | id10477_m__2 | Dialysis     | 3  | id10477_m__3      | Fever | 4 | id10477_m__4 | Heart attack | 5 | id10477_m__5 | Heart problem | 6 | id10477_m__6 | Jaundice | 7 | id10477_m__7 | Liver failure | 8 | id10477_m__8 | Malaria | 9 | id10477_m__9 | Pneumonia | 10 | id10477_m__10 | Renal (kidney) failure | 11 | id10477_m__11 | Suicide | 12 | id10477_m__12 | None of the above words were mentioned | 99 | id10477_m__99 | Don't know |
| 1                                                                    | id10477_m__1                                                                                                                                                                                                                                                                                                                                                         | Chronic kidney disease                                                                                                                                        |                                                                                                                                                                                                                                                                                                                                                                                                                                                                                                                                                                                                                                                                                                                                                                                                                                                                                                         |   |              |                        |            |              |              |    |                   |       |   |              |              |   |              |               |   |              |          |   |              |               |   |              |         |   |              |           |    |               |                        |    |               |         |    |               |                                        |    |               |            |
| 2                                                                    | id10477_m__2                                                                                                                                                                                                                                                                                                                                                         | Dialysis                                                                                                                                                      |                                                                                                                                                                                                                                                                                                                                                                                                                                                                                                                                                                                                                                                                                                                                                                                                                                                                                                         |   |              |                        |            |              |              |    |                   |       |   |              |              |   |              |               |   |              |          |   |              |               |   |              |         |   |              |           |    |               |                        |    |               |         |    |               |                                        |    |               |            |
| 3                                                                    | id10477_m__3                                                                                                                                                                                                                                                                                                                                                         | Fever                                                                                                                                                         |                                                                                                                                                                                                                                                                                                                                                                                                                                                                                                                                                                                                                                                                                                                                                                                                                                                                                                         |   |              |                        |            |              |              |    |                   |       |   |              |              |   |              |               |   |              |          |   |              |               |   |              |         |   |              |           |    |               |                        |    |               |         |    |               |                                        |    |               |            |
| 4                                                                    | id10477_m__4                                                                                                                                                                                                                                                                                                                                                         | Heart attack                                                                                                                                                  |                                                                                                                                                                                                                                                                                                                                                                                                                                                                                                                                                                                                                                                                                                                                                                                                                                                                                                         |   |              |                        |            |              |              |    |                   |       |   |              |              |   |              |               |   |              |          |   |              |               |   |              |         |   |              |           |    |               |                        |    |               |         |    |               |                                        |    |               |            |
| 5                                                                    | id10477_m__5                                                                                                                                                                                                                                                                                                                                                         | Heart problem                                                                                                                                                 |                                                                                                                                                                                                                                                                                                                                                                                                                                                                                                                                                                                                                                                                                                                                                                                                                                                                                                         |   |              |                        |            |              |              |    |                   |       |   |              |              |   |              |               |   |              |          |   |              |               |   |              |         |   |              |           |    |               |                        |    |               |         |    |               |                                        |    |               |            |
| 6                                                                    | id10477_m__6                                                                                                                                                                                                                                                                                                                                                         | Jaundice                                                                                                                                                      |                                                                                                                                                                                                                                                                                                                                                                                                                                                                                                                                                                                                                                                                                                                                                                                                                                                                                                         |   |              |                        |            |              |              |    |                   |       |   |              |              |   |              |               |   |              |          |   |              |               |   |              |         |   |              |           |    |               |                        |    |               |         |    |               |                                        |    |               |            |
| 7                                                                    | id10477_m__7                                                                                                                                                                                                                                                                                                                                                         | Liver failure                                                                                                                                                 |                                                                                                                                                                                                                                                                                                                                                                                                                                                                                                                                                                                                                                                                                                                                                                                                                                                                                                         |   |              |                        |            |              |              |    |                   |       |   |              |              |   |              |               |   |              |          |   |              |               |   |              |         |   |              |           |    |               |                        |    |               |         |    |               |                                        |    |               |            |
| 8                                                                    | id10477_m__8                                                                                                                                                                                                                                                                                                                                                         | Malaria                                                                                                                                                       |                                                                                                                                                                                                                                                                                                                                                                                                                                                                                                                                                                                                                                                                                                                                                                                                                                                                                                         |   |              |                        |            |              |              |    |                   |       |   |              |              |   |              |               |   |              |          |   |              |               |   |              |         |   |              |           |    |               |                        |    |               |         |    |               |                                        |    |               |            |
| 9                                                                    | id10477_m__9                                                                                                                                                                                                                                                                                                                                                         | Pneumonia                                                                                                                                                     |                                                                                                                                                                                                                                                                                                                                                                                                                                                                                                                                                                                                                                                                                                                                                                                                                                                                                                         |   |              |                        |            |              |              |    |                   |       |   |              |              |   |              |               |   |              |          |   |              |               |   |              |         |   |              |           |    |               |                        |    |               |         |    |               |                                        |    |               |            |
| 10                                                                   | id10477_m__10                                                                                                                                                                                                                                                                                                                                                        | Renal (kidney) failure                                                                                                                                        |                                                                                                                                                                                                                                                                                                                                                                                                                                                                                                                                                                                                                                                                                                                                                                                                                                                                                                         |   |              |                        |            |              |              |    |                   |       |   |              |              |   |              |               |   |              |          |   |              |               |   |              |         |   |              |           |    |               |                        |    |               |         |    |               |                                        |    |               |            |
| 11                                                                   | id10477_m__11                                                                                                                                                                                                                                                                                                                                                        | Suicide                                                                                                                                                       |                                                                                                                                                                                                                                                                                                                                                                                                                                                                                                                                                                                                                                                                                                                                                                                                                                                                                                         |   |              |                        |            |              |              |    |                   |       |   |              |              |   |              |               |   |              |          |   |              |               |   |              |         |   |              |           |    |               |                        |    |               |         |    |               |                                        |    |               |            |
| 12                                                                   | id10477_m__12                                                                                                                                                                                                                                                                                                                                                        | None of the above words were mentioned                                                                                                                        |                                                                                                                                                                                                                                                                                                                                                                                                                                                                                                                                                                                                                                                                                                                                                                                                                                                                                                         |   |              |                        |            |              |              |    |                   |       |   |              |              |   |              |               |   |              |          |   |              |               |   |              |         |   |              |           |    |               |                        |    |               |         |    |               |                                        |    |               |            |
| 99                                                                   | id10477_m__99                                                                                                                                                                                                                                                                                                                                                        | Don't know                                                                                                                                                    |                                                                                                                                                                                                                                                                                                                                                                                                                                                                                                                                                                                                                                                                                                                                                                                                                                                                                                         |   |              |                        |            |              |              |    |                   |       |   |              |              |   |              |               |   |              |          |   |              |               |   |              |         |   |              |           |    |               |                        |    |               |         |    |               |                                        |    |               |            |
| 570                                                                  | [id10477_check_m]<br><br>Show the field ONLY if:<br>([id10477_m(12)]= '1' or [id10477_m(99)]= '1') and ([id10477_m(1)]= '1' or [id10477_m(2)]= '1' or [id10477_m(3)]= '1' or [id10477_m(4)]= '1' or [id10477_m(5)]= '1' or [id10477_m(6)]= '1' or [id10477_m(7)]= '1' or [id10477_m(8)]= '1' or [id10477_m(9)]= '1' or [id10477_m(10)]= '1' or [id10477_m(11)]= '1') | It is not possible to select "Don't know" or "None of the above" together with other options. Please go back and correct the selection.                       | descriptive                                                                                                                                                                                                                                                                                                                                                                                                                                                                                                                                                                                                                                                                                                                                                                                                                                                                                             |   |              |                        |            |              |              |    |                   |       |   |              |              |   |              |               |   |              |          |   |              |               |   |              |         |   |              |           |    |               |                        |    |               |         |    |               |                                        |    |               |            |
| 571                                                                  | [verbal_autopsy_mother_complete]                                                                                                                                                                                                                                                                                                                                     | Section Header: <i>Form Status</i><br>Complete?                                                                                                               | dropdown<br><table border="1"> <tr><td>0</td><td>Incomplete</td></tr> <tr><td>1</td><td>Unverified</td></tr> <tr><td>2</td><td>Complete</td></tr> </table>                                                                                                                                                                                                                                                                                                                                                                                                                                                                                                                                                                                                                                                                                                                                              | 0 | Incomplete   | 1                      | Unverified | 2            | Complete     |    |                   |       |   |              |              |   |              |               |   |              |          |   |              |               |   |              |         |   |              |           |    |               |                        |    |               |         |    |               |                                        |    |               |            |
| 0                                                                    | Incomplete                                                                                                                                                                                                                                                                                                                                                           |                                                                                                                                                               |                                                                                                                                                                                                                                                                                                                                                                                                                                                                                                                                                                                                                                                                                                                                                                                                                                                                                                         |   |              |                        |            |              |              |    |                   |       |   |              |              |   |              |               |   |              |          |   |              |               |   |              |         |   |              |           |    |               |                        |    |               |         |    |               |                                        |    |               |            |
| 1                                                                    | Unverified                                                                                                                                                                                                                                                                                                                                                           |                                                                                                                                                               |                                                                                                                                                                                                                                                                                                                                                                                                                                                                                                                                                                                                                                                                                                                                                                                                                                                                                                         |   |              |                        |            |              |              |    |                   |       |   |              |              |   |              |               |   |              |          |   |              |               |   |              |         |   |              |           |    |               |                        |    |               |         |    |               |                                        |    |               |            |
| 2                                                                    | Complete                                                                                                                                                                                                                                                                                                                                                             |                                                                                                                                                               |                                                                                                                                                                                                                                                                                                                                                                                                                                                                                                                                                                                                                                                                                                                                                                                                                                                                                                         |   |              |                        |            |              |              |    |                   |       |   |              |              |   |              |               |   |              |          |   |              |               |   |              |         |   |              |           |    |               |                        |    |               |         |    |               |                                        |    |               |            |
| Instrument: <b>Verbal Autopsy - Newborn</b> (verbal_autopsy_newborn) |                                                                                                                                                                                                                                                                                                                                                                      |                                                                                                                                                               |                                                                                                                                                                                                                                                                                                                                                                                                                                                                                                                                                                                                                                                                                                                                                                                                                                                                                                         |   |              |                        |            |              |              |    |                   |       |   |              |              |   |              |               |   |              |          |   |              |               |   |              |         |   |              |           |    |               |                        |    |               |         |    |               |                                        |    |               |            |
| 572                                                                  | [confirm_studyid_va_n]                                                                                                                                                                                                                                                                                                                                               | Confirm Study ID                                                                                                                                              | text                                                                                                                                                                                                                                                                                                                                                                                                                                                                                                                                                                                                                                                                                                                                                                                                                                                                                                    |   |              |                        |            |              |              |    |                   |       |   |              |              |   |              |               |   |              |          |   |              |               |   |              |         |   |              |           |    |               |                        |    |               |         |    |               |                                        |    |               |            |
| 573                                                                  | [date_va_n]                                                                                                                                                                                                                                                                                                                                                          | Date of verbal autopsy:                                                                                                                                       | text (date_dmy)                                                                                                                                                                                                                                                                                                                                                                                                                                                                                                                                                                                                                                                                                                                                                                                                                                                                                         |   |              |                        |            |              |              |    |                   |       |   |              |              |   |              |               |   |              |          |   |              |               |   |              |         |   |              |           |    |               |                        |    |               |         |    |               |                                        |    |               |            |

|     |                                                                                                                                                                                                                                       |                                                                                                                                                                                                                                                        |                                                                                                                                                                                                                                                                                                                                                                                                                          |   |        |   |       |    |                     |    |                   |   |        |   |               |   |                 |   |                      |    |                   |
|-----|---------------------------------------------------------------------------------------------------------------------------------------------------------------------------------------------------------------------------------------|--------------------------------------------------------------------------------------------------------------------------------------------------------------------------------------------------------------------------------------------------------|--------------------------------------------------------------------------------------------------------------------------------------------------------------------------------------------------------------------------------------------------------------------------------------------------------------------------------------------------------------------------------------------------------------------------|---|--------|---|-------|----|---------------------|----|-------------------|---|--------|---|---------------|---|-----------------|---|----------------------|----|-------------------|
| 574 | [id10007]                                                                                                                                                                                                                             | Section Header: <i>Information on the respondent and background about interview</i><br>What is the sex of VA respondent?                                                                                                                               | radio<br><table border="1"> <tr><td>1</td><td>Female</td></tr> <tr><td>2</td><td>Male</td></tr> <tr><td>3</td><td>Ambiguous/Intersex</td></tr> </table>                                                                                                                                                                                                                                                                  | 1 | Female | 2 | Male  | 3  | Ambiguous/Intersex  |    |                   |   |        |   |               |   |                 |   |                      |    |                   |
| 1   | Female                                                                                                                                                                                                                                |                                                                                                                                                                                                                                                        |                                                                                                                                                                                                                                                                                                                                                                                                                          |   |        |   |       |    |                     |    |                   |   |        |   |               |   |                 |   |                      |    |                   |
| 2   | Male                                                                                                                                                                                                                                  |                                                                                                                                                                                                                                                        |                                                                                                                                                                                                                                                                                                                                                                                                                          |   |        |   |       |    |                     |    |                   |   |        |   |               |   |                 |   |                      |    |                   |
| 3   | Ambiguous/Intersex                                                                                                                                                                                                                    |                                                                                                                                                                                                                                                        |                                                                                                                                                                                                                                                                                                                                                                                                                          |   |        |   |       |    |                     |    |                   |   |        |   |               |   |                 |   |                      |    |                   |
| 575 | [id10008]                                                                                                                                                                                                                             | What is your/the respondent's relationship to the deceased?                                                                                                                                                                                            | dropdown<br><table border="1"> <tr><td>1</td><td>Parent</td></tr> <tr><td>2</td><td>Child</td></tr> <tr><td>3</td><td>Other family member</td></tr> <tr><td>4</td><td>Friend</td></tr> <tr><td>5</td><td>Spouse</td></tr> <tr><td>6</td><td>Health worker</td></tr> <tr><td>7</td><td>Public official</td></tr> <tr><td>8</td><td>Another relationship</td></tr> <tr><td>88</td><td>Refused to answer</td></tr> </table> | 1 | Parent | 2 | Child | 3  | Other family member | 4  | Friend            | 5 | Spouse | 6 | Health worker | 7 | Public official | 8 | Another relationship | 88 | Refused to answer |
| 1   | Parent                                                                                                                                                                                                                                |                                                                                                                                                                                                                                                        |                                                                                                                                                                                                                                                                                                                                                                                                                          |   |        |   |       |    |                     |    |                   |   |        |   |               |   |                 |   |                      |    |                   |
| 2   | Child                                                                                                                                                                                                                                 |                                                                                                                                                                                                                                                        |                                                                                                                                                                                                                                                                                                                                                                                                                          |   |        |   |       |    |                     |    |                   |   |        |   |               |   |                 |   |                      |    |                   |
| 3   | Other family member                                                                                                                                                                                                                   |                                                                                                                                                                                                                                                        |                                                                                                                                                                                                                                                                                                                                                                                                                          |   |        |   |       |    |                     |    |                   |   |        |   |               |   |                 |   |                      |    |                   |
| 4   | Friend                                                                                                                                                                                                                                |                                                                                                                                                                                                                                                        |                                                                                                                                                                                                                                                                                                                                                                                                                          |   |        |   |       |    |                     |    |                   |   |        |   |               |   |                 |   |                      |    |                   |
| 5   | Spouse                                                                                                                                                                                                                                |                                                                                                                                                                                                                                                        |                                                                                                                                                                                                                                                                                                                                                                                                                          |   |        |   |       |    |                     |    |                   |   |        |   |               |   |                 |   |                      |    |                   |
| 6   | Health worker                                                                                                                                                                                                                         |                                                                                                                                                                                                                                                        |                                                                                                                                                                                                                                                                                                                                                                                                                          |   |        |   |       |    |                     |    |                   |   |        |   |               |   |                 |   |                      |    |                   |
| 7   | Public official                                                                                                                                                                                                                       |                                                                                                                                                                                                                                                        |                                                                                                                                                                                                                                                                                                                                                                                                                          |   |        |   |       |    |                     |    |                   |   |        |   |               |   |                 |   |                      |    |                   |
| 8   | Another relationship                                                                                                                                                                                                                  |                                                                                                                                                                                                                                                        |                                                                                                                                                                                                                                                                                                                                                                                                                          |   |        |   |       |    |                     |    |                   |   |        |   |               |   |                 |   |                      |    |                   |
| 88  | Refused to answer                                                                                                                                                                                                                     |                                                                                                                                                                                                                                                        |                                                                                                                                                                                                                                                                                                                                                                                                                          |   |        |   |       |    |                     |    |                   |   |        |   |               |   |                 |   |                      |    |                   |
| 576 | [id10009]                                                                                                                                                                                                                             | Did you/the respondent live with the deceased in the period leading to her/his death?                                                                                                                                                                  | radio<br><table border="1"> <tr><td>1</td><td>Yes</td></tr> <tr><td>0</td><td>No</td></tr> <tr><td>99</td><td>Doesn't know</td></tr> <tr><td>88</td><td>Refused to answer</td></tr> </table>                                                                                                                                                                                                                             | 1 | Yes    | 0 | No    | 99 | Doesn't know        | 88 | Refused to answer |   |        |   |               |   |                 |   |                      |    |                   |
| 1   | Yes                                                                                                                                                                                                                                   |                                                                                                                                                                                                                                                        |                                                                                                                                                                                                                                                                                                                                                                                                                          |   |        |   |       |    |                     |    |                   |   |        |   |               |   |                 |   |                      |    |                   |
| 0   | No                                                                                                                                                                                                                                    |                                                                                                                                                                                                                                                        |                                                                                                                                                                                                                                                                                                                                                                                                                          |   |        |   |       |    |                     |    |                   |   |        |   |               |   |                 |   |                      |    |                   |
| 99  | Doesn't know                                                                                                                                                                                                                          |                                                                                                                                                                                                                                                        |                                                                                                                                                                                                                                                                                                                                                                                                                          |   |        |   |       |    |                     |    |                   |   |        |   |               |   |                 |   |                      |    |                   |
| 88  | Refused to answer                                                                                                                                                                                                                     |                                                                                                                                                                                                                                                        |                                                                                                                                                                                                                                                                                                                                                                                                                          |   |        |   |       |    |                     |    |                   |   |        |   |               |   |                 |   |                      |    |                   |
| 577 | [id10013]                                                                                                                                                                                                                             | Did the respondent give consent?                                                                                                                                                                                                                       | radio<br><table border="1"> <tr><td>1</td><td>Yes</td></tr> <tr><td>0</td><td>No</td></tr> </table>                                                                                                                                                                                                                                                                                                                      | 1 | Yes    | 0 | No    |    |                     |    |                   |   |        |   |               |   |                 |   |                      |    |                   |
| 1   | Yes                                                                                                                                                                                                                                   |                                                                                                                                                                                                                                                        |                                                                                                                                                                                                                                                                                                                                                                                                                          |   |        |   |       |    |                     |    |                   |   |        |   |               |   |                 |   |                      |    |                   |
| 0   | No                                                                                                                                                                                                                                    |                                                                                                                                                                                                                                                        |                                                                                                                                                                                                                                                                                                                                                                                                                          |   |        |   |       |    |                     |    |                   |   |        |   |               |   |                 |   |                      |    |                   |
| 578 | [ageindays_warning]<br>Show the field ONLY if:<br>([[dispbbs_neo][current-instance] = '3' or [admitdisposition_neo][current-instance] = '1' or [babealive_swf][current-instance] = '0'] and [babedeathdate_swf][current-instance] = " | Age at death could not be calculated - missing date of death. Please enter date of death on Six-Week Followup form.                                                                                                                                    | descriptive                                                                                                                                                                                                                                                                                                                                                                                                              |   |        |   |       |    |                     |    |                   |   |        |   |               |   |                 |   |                      |    |                   |
| 579 | [ageindays]                                                                                                                                                                                                                           | Baby's age at death (in days):                                                                                                                                                                                                                         | calc<br>Calculation: if([[dispbbs_neo][current-instance] = '3' or [admitdisposition_neo][current-instance] = '1' or [babealive_swf][current-instance] = '0', rounddown(datediff([deldate_del], [babedeathdate_swf][current-instance], 'd')), ")                                                                                                                                                                          |   |        |   |       |    |                     |    |                   |   |        |   |               |   |                 |   |                      |    |                   |
| 580 | [displayagechild]<br>Show the field ONLY if:<br>[ageindays]>=28                                                                                                                                                                       | You will now be filling in the questionnaire for a baby >28 days old.                                                                                                                                                                                  | descriptive                                                                                                                                                                                                                                                                                                                                                                                                              |   |        |   |       |    |                     |    |                   |   |        |   |               |   |                 |   |                      |    |                   |
| 581 | [displayage neonate]<br>Show the field ONLY if:<br>[ageindays]<28                                                                                                                                                                     | You will now be filling in the questionnaire for a neonate (< 28 days old).                                                                                                                                                                            | descriptive                                                                                                                                                                                                                                                                                                                                                                                                              |   |        |   |       |    |                     |    |                   |   |        |   |               |   |                 |   |                      |    |                   |
| 582 | [id10487]                                                                                                                                                                                                                             | In the two weeks before death, did the baby live with or visit someone who had any COVID-19 symptoms or a positive COVID-19 test?                                                                                                                      | radio<br><table border="1"> <tr><td>1</td><td>Yes</td></tr> <tr><td>0</td><td>No</td></tr> <tr><td>99</td><td>Doesn't know</td></tr> <tr><td>88</td><td>Refused to answer</td></tr> </table>                                                                                                                                                                                                                             | 1 | Yes    | 0 | No    | 99 | Doesn't know        | 88 | Refused to answer |   |        |   |               |   |                 |   |                      |    |                   |
| 1   | Yes                                                                                                                                                                                                                                   |                                                                                                                                                                                                                                                        |                                                                                                                                                                                                                                                                                                                                                                                                                          |   |        |   |       |    |                     |    |                   |   |        |   |               |   |                 |   |                      |    |                   |
| 0   | No                                                                                                                                                                                                                                    |                                                                                                                                                                                                                                                        |                                                                                                                                                                                                                                                                                                                                                                                                                          |   |        |   |       |    |                     |    |                   |   |        |   |               |   |                 |   |                      |    |                   |
| 99  | Doesn't know                                                                                                                                                                                                                          |                                                                                                                                                                                                                                                        |                                                                                                                                                                                                                                                                                                                                                                                                                          |   |        |   |       |    |                     |    |                   |   |        |   |               |   |                 |   |                      |    |                   |
| 88  | Refused to answer                                                                                                                                                                                                                     |                                                                                                                                                                                                                                                        |                                                                                                                                                                                                                                                                                                                                                                                                                          |   |        |   |       |    |                     |    |                   |   |        |   |               |   |                 |   |                      |    |                   |
| 583 | [id10488]                                                                                                                                                                                                                             | In the two weeks before death, did the baby travel to an area where COVID-19 is known to be present?<br><i>Based on self-report of the respondent. If there is doubt, note the location in the narrative and check with the respective supervisor.</i> | radio<br><table border="1"> <tr><td>1</td><td>Yes</td></tr> <tr><td>0</td><td>No</td></tr> <tr><td>99</td><td>Doesn't know</td></tr> <tr><td>88</td><td>Refused to answer</td></tr> </table>                                                                                                                                                                                                                             | 1 | Yes    | 0 | No    | 99 | Doesn't know        | 88 | Refused to answer |   |        |   |               |   |                 |   |                      |    |                   |
| 1   | Yes                                                                                                                                                                                                                                   |                                                                                                                                                                                                                                                        |                                                                                                                                                                                                                                                                                                                                                                                                                          |   |        |   |       |    |                     |    |                   |   |        |   |               |   |                 |   |                      |    |                   |
| 0   | No                                                                                                                                                                                                                                    |                                                                                                                                                                                                                                                        |                                                                                                                                                                                                                                                                                                                                                                                                                          |   |        |   |       |    |                     |    |                   |   |        |   |               |   |                 |   |                      |    |                   |
| 99  | Doesn't know                                                                                                                                                                                                                          |                                                                                                                                                                                                                                                        |                                                                                                                                                                                                                                                                                                                                                                                                                          |   |        |   |       |    |                     |    |                   |   |        |   |               |   |                 |   |                      |    |                   |
| 88  | Refused to answer                                                                                                                                                                                                                     |                                                                                                                                                                                                                                                        |                                                                                                                                                                                                                                                                                                                                                                                                                          |   |        |   |       |    |                     |    |                   |   |        |   |               |   |                 |   |                      |    |                   |

|     |                                                                                                                                        |                                                                                                                                                                    |                                                                                                                                                                                                                                                                                                                                                                                                                                                              |   |                        |                                            |    |                        |                                       |   |                        |                                                                 |    |                         |       |
|-----|----------------------------------------------------------------------------------------------------------------------------------------|--------------------------------------------------------------------------------------------------------------------------------------------------------------------|--------------------------------------------------------------------------------------------------------------------------------------------------------------------------------------------------------------------------------------------------------------------------------------------------------------------------------------------------------------------------------------------------------------------------------------------------------------|---|------------------------|--------------------------------------------|----|------------------------|---------------------------------------|---|------------------------|-----------------------------------------------------------------|----|-------------------------|-------|
| 584 | [babeadmit_va]<br>Show the field ONLY if:<br>[dispbb_neo][current-instance] != '3' and [admitdisposition_neo][current-instance] != '1' | Section Header: <i>Health seeking/readmissions</i><br>Was the newborn admitted for one or more nights at a facility for any reason after being home post-delivery? | yesno<br><table border="1"> <tr> <td>1</td> <td>Yes</td> </tr> <tr> <td>0</td> <td>No</td> </tr> </table>                                                                                                                                                                                                                                                                                                                                                    | 1 | Yes                    | 0                                          | No |                        |                                       |   |                        |                                                                 |    |                         |       |
| 1   | Yes                                                                                                                                    |                                                                                                                                                                    |                                                                                                                                                                                                                                                                                                                                                                                                                                                              |   |                        |                                            |    |                        |                                       |   |                        |                                                                 |    |                         |       |
| 0   | No                                                                                                                                     |                                                                                                                                                                    |                                                                                                                                                                                                                                                                                                                                                                                                                                                              |   |                        |                                            |    |                        |                                       |   |                        |                                                                 |    |                         |       |
| 585 | [numbabeadmit_va]<br>Show the field ONLY if:<br>[babeadmit_va] = '1'                                                                   | How many times was the baby admitted in the first 6 weeks after birth                                                                                              | dropdown<br><table border="1"> <tr> <td>1</td> <td>1</td> </tr> <tr> <td>2</td> <td>2</td> </tr> <tr> <td>3</td> <td>3</td> </tr> <tr> <td>4</td> <td>&gt;3</td> </tr> </table>                                                                                                                                                                                                                                                                              | 1 | 1                      | 2                                          | 2  | 3                      | 3                                     | 4 | >3                     |                                                                 |    |                         |       |
| 1   | 1                                                                                                                                      |                                                                                                                                                                    |                                                                                                                                                                                                                                                                                                                                                                                                                                                              |   |                        |                                            |    |                        |                                       |   |                        |                                                                 |    |                         |       |
| 2   | 2                                                                                                                                      |                                                                                                                                                                    |                                                                                                                                                                                                                                                                                                                                                                                                                                                              |   |                        |                                            |    |                        |                                       |   |                        |                                                                 |    |                         |       |
| 3   | 3                                                                                                                                      |                                                                                                                                                                    |                                                                                                                                                                                                                                                                                                                                                                                                                                                              |   |                        |                                            |    |                        |                                       |   |                        |                                                                 |    |                         |       |
| 4   | >3                                                                                                                                     |                                                                                                                                                                    |                                                                                                                                                                                                                                                                                                                                                                                                                                                              |   |                        |                                            |    |                        |                                       |   |                        |                                                                 |    |                         |       |
| 586 | [babeadmitage_va]<br>Show the field ONLY if:<br>[babeadmit_va] = '1'                                                                   | How many days old was the baby during the first admission?                                                                                                         | text (integer, Min: 1, Max: 42)                                                                                                                                                                                                                                                                                                                                                                                                                              |   |                        |                                            |    |                        |                                       |   |                        |                                                                 |    |                         |       |
| 587 | [babenightsadm_va]<br>Show the field ONLY if:<br>[babeadmit_va] = '1'                                                                  | For how many nights were they admitted?                                                                                                                            | text (integer, Min: 1)                                                                                                                                                                                                                                                                                                                                                                                                                                       |   |                        |                                            |    |                        |                                       |   |                        |                                                                 |    |                         |       |
| 588 | [babeadmitpathway_va]<br>Show the field ONLY if:<br>[babeadmit_va] = '1'                                                               | What was the care-seeking pathway to this admission?                                                                                                               | checkbox<br><table border="1"> <tr> <td>1</td> <td>babeadmitpathway_va__1</td> <td>Routine well-baby visit identified problem</td> </tr> <tr> <td>2</td> <td>babeadmitpathway_va__2</td> <td>Self referral due to parental concern</td> </tr> <tr> <td>3</td> <td>babeadmitpathway_va__3</td> <td>Both self-referral and well-baby visit resulted in care seeking</td> </tr> <tr> <td>98</td> <td>babeadmitpathway_va__98</td> <td>Other</td> </tr> </table> | 1 | babeadmitpathway_va__1 | Routine well-baby visit identified problem | 2  | babeadmitpathway_va__2 | Self referral due to parental concern | 3 | babeadmitpathway_va__3 | Both self-referral and well-baby visit resulted in care seeking | 98 | babeadmitpathway_va__98 | Other |
| 1   | babeadmitpathway_va__1                                                                                                                 | Routine well-baby visit identified problem                                                                                                                         |                                                                                                                                                                                                                                                                                                                                                                                                                                                              |   |                        |                                            |    |                        |                                       |   |                        |                                                                 |    |                         |       |
| 2   | babeadmitpathway_va__2                                                                                                                 | Self referral due to parental concern                                                                                                                              |                                                                                                                                                                                                                                                                                                                                                                                                                                                              |   |                        |                                            |    |                        |                                       |   |                        |                                                                 |    |                         |       |
| 3   | babeadmitpathway_va__3                                                                                                                 | Both self-referral and well-baby visit resulted in care seeking                                                                                                    |                                                                                                                                                                                                                                                                                                                                                                                                                                                              |   |                        |                                            |    |                        |                                       |   |                        |                                                                 |    |                         |       |
| 98  | babeadmitpathway_va__98                                                                                                                | Other                                                                                                                                                              |                                                                                                                                                                                                                                                                                                                                                                                                                                                              |   |                        |                                            |    |                        |                                       |   |                        |                                                                 |    |                         |       |
| 589 | [babeadmitpathwayother_va]<br>Show the field ONLY if:<br>[babeadmitpathway_va(98)] = '1'                                               | Other pathway:                                                                                                                                                     | text                                                                                                                                                                                                                                                                                                                                                                                                                                                         |   |                        |                                            |    |                        |                                       |   |                        |                                                                 |    |                         |       |

|          |                                                                                    |                                                                                          |                                                                                                                                                                                                                                                                                                                                                                                                                                                                                                                                                                                                                                                                                                                                                                                                                                                                                                                                                                                                                                                                                                                                                                                                                                                                                                                                                                                                                                                                                                                                                                                                                                                                                                                                            |          |  |   |     |                     |               |   |                     |                      |   |                     |                            |   |                     |                        |   |                     |                              |   |                     |                   |   |                     |                                            |   |                     |                       |   |                     |                        |    |                      |                              |    |                      |                |    |                      |                     |    |                      |      |    |                      |              |    |                      |                               |    |                      |       |    |                      |                                                |    |                      |                    |    |                      |       |    |                      |      |
|----------|------------------------------------------------------------------------------------|------------------------------------------------------------------------------------------|--------------------------------------------------------------------------------------------------------------------------------------------------------------------------------------------------------------------------------------------------------------------------------------------------------------------------------------------------------------------------------------------------------------------------------------------------------------------------------------------------------------------------------------------------------------------------------------------------------------------------------------------------------------------------------------------------------------------------------------------------------------------------------------------------------------------------------------------------------------------------------------------------------------------------------------------------------------------------------------------------------------------------------------------------------------------------------------------------------------------------------------------------------------------------------------------------------------------------------------------------------------------------------------------------------------------------------------------------------------------------------------------------------------------------------------------------------------------------------------------------------------------------------------------------------------------------------------------------------------------------------------------------------------------------------------------------------------------------------------------|----------|--|---|-----|---------------------|---------------|---|---------------------|----------------------|---|---------------------|----------------------------|---|---------------------|------------------------|---|---------------------|------------------------------|---|---------------------|-------------------|---|---------------------|--------------------------------------------|---|---------------------|-----------------------|---|---------------------|------------------------|----|----------------------|------------------------------|----|----------------------|----------------|----|----------------------|---------------------|----|----------------------|------|----|----------------------|--------------|----|----------------------|-------------------------------|----|----------------------|-------|----|----------------------|------------------------------------------------|----|----------------------|--------------------|----|----------------------|-------|----|----------------------|------|
| 590      | [babeadmitsymp_va]<br>Show the field ONLY if:<br>[babeadmit_va] = '1'              | What were the symptoms the child experienced during this illness (check all that apply)? | <table border="1"> <tr> <td colspan="3">checkbox</td> </tr> <tr> <td>1</td> <td>babeadmitsymp_va__1</td> <td>Skin pustules</td> </tr> <tr> <td>2</td> <td>babeadmitsymp_va__2</td> <td>Respiratory distress</td> </tr> <tr> <td>3</td> <td>babeadmitsymp_va__3</td> <td>Watery stool</td> </tr> <tr> <td>4</td> <td>babeadmitsymp_va__4</td> <td>Fever/hotness of body</td> </tr> <tr> <td>5</td> <td>babeadmitsymp_va__5</td> <td>Bilious vomit</td> </tr> <tr> <td>6</td> <td>babeadmitsymp_va__6</td> <td>projectile vomit</td> </tr> <tr> <td>7</td> <td>babeadmitsymp_va__7</td> <td>Not waking up to feed or abnormally sleepy</td> </tr> <tr> <td>8</td> <td>babeadmitsymp_va__8</td> <td>Swelling of both feet</td> </tr> <tr> <td>9</td> <td>babeadmitsymp_va__9</td> <td>Changes in urine color</td> </tr> <tr> <td>10</td> <td>babeadmitsymp_va__10</td> <td>Making less urine than usual</td> </tr> <tr> <td>11</td> <td>babeadmitsymp_va__11</td> <td>Blood in stool</td> </tr> <tr> <td>12</td> <td>babeadmitsymp_va__12</td> <td>Seizure/convulsions</td> </tr> <tr> <td>13</td> <td>babeadmitsymp_va__13</td> <td>Coma</td> </tr> <tr> <td>14</td> <td>babeadmitsymp_va__14</td> <td>Yellow soles</td> </tr> <tr> <td>15</td> <td>babeadmitsymp_va__15</td> <td>Difficulty with breastfeeding</td> </tr> <tr> <td>16</td> <td>babeadmitsymp_va__16</td> <td>Cough</td> </tr> <tr> <td>17</td> <td>babeadmitsymp_va__17</td> <td>Umbilical cord problem (pain, discharge, etc.)</td> </tr> <tr> <td>18</td> <td>babeadmitsymp_va__18</td> <td>Not gaining weight</td> </tr> <tr> <td>98</td> <td>babeadmitsymp_va__98</td> <td>Other</td> </tr> <tr> <td>99</td> <td>babeadmitsymp_va__99</td> <td>None</td> </tr> </table> | checkbox |  |   | 1   | babeadmitsymp_va__1 | Skin pustules | 2 | babeadmitsymp_va__2 | Respiratory distress | 3 | babeadmitsymp_va__3 | Watery stool               | 4 | babeadmitsymp_va__4 | Fever/hotness of body  | 5 | babeadmitsymp_va__5 | Bilious vomit                | 6 | babeadmitsymp_va__6 | projectile vomit  | 7 | babeadmitsymp_va__7 | Not waking up to feed or abnormally sleepy | 8 | babeadmitsymp_va__8 | Swelling of both feet | 9 | babeadmitsymp_va__9 | Changes in urine color | 10 | babeadmitsymp_va__10 | Making less urine than usual | 11 | babeadmitsymp_va__11 | Blood in stool | 12 | babeadmitsymp_va__12 | Seizure/convulsions | 13 | babeadmitsymp_va__13 | Coma | 14 | babeadmitsymp_va__14 | Yellow soles | 15 | babeadmitsymp_va__15 | Difficulty with breastfeeding | 16 | babeadmitsymp_va__16 | Cough | 17 | babeadmitsymp_va__17 | Umbilical cord problem (pain, discharge, etc.) | 18 | babeadmitsymp_va__18 | Not gaining weight | 98 | babeadmitsymp_va__98 | Other | 99 | babeadmitsymp_va__99 | None |
| checkbox |                                                                                    |                                                                                          |                                                                                                                                                                                                                                                                                                                                                                                                                                                                                                                                                                                                                                                                                                                                                                                                                                                                                                                                                                                                                                                                                                                                                                                                                                                                                                                                                                                                                                                                                                                                                                                                                                                                                                                                            |          |  |   |     |                     |               |   |                     |                      |   |                     |                            |   |                     |                        |   |                     |                              |   |                     |                   |   |                     |                                            |   |                     |                       |   |                     |                        |    |                      |                              |    |                      |                |    |                      |                     |    |                      |      |    |                      |              |    |                      |                               |    |                      |       |    |                      |                                                |    |                      |                    |    |                      |       |    |                      |      |
| 1        | babeadmitsymp_va__1                                                                | Skin pustules                                                                            |                                                                                                                                                                                                                                                                                                                                                                                                                                                                                                                                                                                                                                                                                                                                                                                                                                                                                                                                                                                                                                                                                                                                                                                                                                                                                                                                                                                                                                                                                                                                                                                                                                                                                                                                            |          |  |   |     |                     |               |   |                     |                      |   |                     |                            |   |                     |                        |   |                     |                              |   |                     |                   |   |                     |                                            |   |                     |                       |   |                     |                        |    |                      |                              |    |                      |                |    |                      |                     |    |                      |      |    |                      |              |    |                      |                               |    |                      |       |    |                      |                                                |    |                      |                    |    |                      |       |    |                      |      |
| 2        | babeadmitsymp_va__2                                                                | Respiratory distress                                                                     |                                                                                                                                                                                                                                                                                                                                                                                                                                                                                                                                                                                                                                                                                                                                                                                                                                                                                                                                                                                                                                                                                                                                                                                                                                                                                                                                                                                                                                                                                                                                                                                                                                                                                                                                            |          |  |   |     |                     |               |   |                     |                      |   |                     |                            |   |                     |                        |   |                     |                              |   |                     |                   |   |                     |                                            |   |                     |                       |   |                     |                        |    |                      |                              |    |                      |                |    |                      |                     |    |                      |      |    |                      |              |    |                      |                               |    |                      |       |    |                      |                                                |    |                      |                    |    |                      |       |    |                      |      |
| 3        | babeadmitsymp_va__3                                                                | Watery stool                                                                             |                                                                                                                                                                                                                                                                                                                                                                                                                                                                                                                                                                                                                                                                                                                                                                                                                                                                                                                                                                                                                                                                                                                                                                                                                                                                                                                                                                                                                                                                                                                                                                                                                                                                                                                                            |          |  |   |     |                     |               |   |                     |                      |   |                     |                            |   |                     |                        |   |                     |                              |   |                     |                   |   |                     |                                            |   |                     |                       |   |                     |                        |    |                      |                              |    |                      |                |    |                      |                     |    |                      |      |    |                      |              |    |                      |                               |    |                      |       |    |                      |                                                |    |                      |                    |    |                      |       |    |                      |      |
| 4        | babeadmitsymp_va__4                                                                | Fever/hotness of body                                                                    |                                                                                                                                                                                                                                                                                                                                                                                                                                                                                                                                                                                                                                                                                                                                                                                                                                                                                                                                                                                                                                                                                                                                                                                                                                                                                                                                                                                                                                                                                                                                                                                                                                                                                                                                            |          |  |   |     |                     |               |   |                     |                      |   |                     |                            |   |                     |                        |   |                     |                              |   |                     |                   |   |                     |                                            |   |                     |                       |   |                     |                        |    |                      |                              |    |                      |                |    |                      |                     |    |                      |      |    |                      |              |    |                      |                               |    |                      |       |    |                      |                                                |    |                      |                    |    |                      |       |    |                      |      |
| 5        | babeadmitsymp_va__5                                                                | Bilious vomit                                                                            |                                                                                                                                                                                                                                                                                                                                                                                                                                                                                                                                                                                                                                                                                                                                                                                                                                                                                                                                                                                                                                                                                                                                                                                                                                                                                                                                                                                                                                                                                                                                                                                                                                                                                                                                            |          |  |   |     |                     |               |   |                     |                      |   |                     |                            |   |                     |                        |   |                     |                              |   |                     |                   |   |                     |                                            |   |                     |                       |   |                     |                        |    |                      |                              |    |                      |                |    |                      |                     |    |                      |      |    |                      |              |    |                      |                               |    |                      |       |    |                      |                                                |    |                      |                    |    |                      |       |    |                      |      |
| 6        | babeadmitsymp_va__6                                                                | projectile vomit                                                                         |                                                                                                                                                                                                                                                                                                                                                                                                                                                                                                                                                                                                                                                                                                                                                                                                                                                                                                                                                                                                                                                                                                                                                                                                                                                                                                                                                                                                                                                                                                                                                                                                                                                                                                                                            |          |  |   |     |                     |               |   |                     |                      |   |                     |                            |   |                     |                        |   |                     |                              |   |                     |                   |   |                     |                                            |   |                     |                       |   |                     |                        |    |                      |                              |    |                      |                |    |                      |                     |    |                      |      |    |                      |              |    |                      |                               |    |                      |       |    |                      |                                                |    |                      |                    |    |                      |       |    |                      |      |
| 7        | babeadmitsymp_va__7                                                                | Not waking up to feed or abnormally sleepy                                               |                                                                                                                                                                                                                                                                                                                                                                                                                                                                                                                                                                                                                                                                                                                                                                                                                                                                                                                                                                                                                                                                                                                                                                                                                                                                                                                                                                                                                                                                                                                                                                                                                                                                                                                                            |          |  |   |     |                     |               |   |                     |                      |   |                     |                            |   |                     |                        |   |                     |                              |   |                     |                   |   |                     |                                            |   |                     |                       |   |                     |                        |    |                      |                              |    |                      |                |    |                      |                     |    |                      |      |    |                      |              |    |                      |                               |    |                      |       |    |                      |                                                |    |                      |                    |    |                      |       |    |                      |      |
| 8        | babeadmitsymp_va__8                                                                | Swelling of both feet                                                                    |                                                                                                                                                                                                                                                                                                                                                                                                                                                                                                                                                                                                                                                                                                                                                                                                                                                                                                                                                                                                                                                                                                                                                                                                                                                                                                                                                                                                                                                                                                                                                                                                                                                                                                                                            |          |  |   |     |                     |               |   |                     |                      |   |                     |                            |   |                     |                        |   |                     |                              |   |                     |                   |   |                     |                                            |   |                     |                       |   |                     |                        |    |                      |                              |    |                      |                |    |                      |                     |    |                      |      |    |                      |              |    |                      |                               |    |                      |       |    |                      |                                                |    |                      |                    |    |                      |       |    |                      |      |
| 9        | babeadmitsymp_va__9                                                                | Changes in urine color                                                                   |                                                                                                                                                                                                                                                                                                                                                                                                                                                                                                                                                                                                                                                                                                                                                                                                                                                                                                                                                                                                                                                                                                                                                                                                                                                                                                                                                                                                                                                                                                                                                                                                                                                                                                                                            |          |  |   |     |                     |               |   |                     |                      |   |                     |                            |   |                     |                        |   |                     |                              |   |                     |                   |   |                     |                                            |   |                     |                       |   |                     |                        |    |                      |                              |    |                      |                |    |                      |                     |    |                      |      |    |                      |              |    |                      |                               |    |                      |       |    |                      |                                                |    |                      |                    |    |                      |       |    |                      |      |
| 10       | babeadmitsymp_va__10                                                               | Making less urine than usual                                                             |                                                                                                                                                                                                                                                                                                                                                                                                                                                                                                                                                                                                                                                                                                                                                                                                                                                                                                                                                                                                                                                                                                                                                                                                                                                                                                                                                                                                                                                                                                                                                                                                                                                                                                                                            |          |  |   |     |                     |               |   |                     |                      |   |                     |                            |   |                     |                        |   |                     |                              |   |                     |                   |   |                     |                                            |   |                     |                       |   |                     |                        |    |                      |                              |    |                      |                |    |                      |                     |    |                      |      |    |                      |              |    |                      |                               |    |                      |       |    |                      |                                                |    |                      |                    |    |                      |       |    |                      |      |
| 11       | babeadmitsymp_va__11                                                               | Blood in stool                                                                           |                                                                                                                                                                                                                                                                                                                                                                                                                                                                                                                                                                                                                                                                                                                                                                                                                                                                                                                                                                                                                                                                                                                                                                                                                                                                                                                                                                                                                                                                                                                                                                                                                                                                                                                                            |          |  |   |     |                     |               |   |                     |                      |   |                     |                            |   |                     |                        |   |                     |                              |   |                     |                   |   |                     |                                            |   |                     |                       |   |                     |                        |    |                      |                              |    |                      |                |    |                      |                     |    |                      |      |    |                      |              |    |                      |                               |    |                      |       |    |                      |                                                |    |                      |                    |    |                      |       |    |                      |      |
| 12       | babeadmitsymp_va__12                                                               | Seizure/convulsions                                                                      |                                                                                                                                                                                                                                                                                                                                                                                                                                                                                                                                                                                                                                                                                                                                                                                                                                                                                                                                                                                                                                                                                                                                                                                                                                                                                                                                                                                                                                                                                                                                                                                                                                                                                                                                            |          |  |   |     |                     |               |   |                     |                      |   |                     |                            |   |                     |                        |   |                     |                              |   |                     |                   |   |                     |                                            |   |                     |                       |   |                     |                        |    |                      |                              |    |                      |                |    |                      |                     |    |                      |      |    |                      |              |    |                      |                               |    |                      |       |    |                      |                                                |    |                      |                    |    |                      |       |    |                      |      |
| 13       | babeadmitsymp_va__13                                                               | Coma                                                                                     |                                                                                                                                                                                                                                                                                                                                                                                                                                                                                                                                                                                                                                                                                                                                                                                                                                                                                                                                                                                                                                                                                                                                                                                                                                                                                                                                                                                                                                                                                                                                                                                                                                                                                                                                            |          |  |   |     |                     |               |   |                     |                      |   |                     |                            |   |                     |                        |   |                     |                              |   |                     |                   |   |                     |                                            |   |                     |                       |   |                     |                        |    |                      |                              |    |                      |                |    |                      |                     |    |                      |      |    |                      |              |    |                      |                               |    |                      |       |    |                      |                                                |    |                      |                    |    |                      |       |    |                      |      |
| 14       | babeadmitsymp_va__14                                                               | Yellow soles                                                                             |                                                                                                                                                                                                                                                                                                                                                                                                                                                                                                                                                                                                                                                                                                                                                                                                                                                                                                                                                                                                                                                                                                                                                                                                                                                                                                                                                                                                                                                                                                                                                                                                                                                                                                                                            |          |  |   |     |                     |               |   |                     |                      |   |                     |                            |   |                     |                        |   |                     |                              |   |                     |                   |   |                     |                                            |   |                     |                       |   |                     |                        |    |                      |                              |    |                      |                |    |                      |                     |    |                      |      |    |                      |              |    |                      |                               |    |                      |       |    |                      |                                                |    |                      |                    |    |                      |       |    |                      |      |
| 15       | babeadmitsymp_va__15                                                               | Difficulty with breastfeeding                                                            |                                                                                                                                                                                                                                                                                                                                                                                                                                                                                                                                                                                                                                                                                                                                                                                                                                                                                                                                                                                                                                                                                                                                                                                                                                                                                                                                                                                                                                                                                                                                                                                                                                                                                                                                            |          |  |   |     |                     |               |   |                     |                      |   |                     |                            |   |                     |                        |   |                     |                              |   |                     |                   |   |                     |                                            |   |                     |                       |   |                     |                        |    |                      |                              |    |                      |                |    |                      |                     |    |                      |      |    |                      |              |    |                      |                               |    |                      |       |    |                      |                                                |    |                      |                    |    |                      |       |    |                      |      |
| 16       | babeadmitsymp_va__16                                                               | Cough                                                                                    |                                                                                                                                                                                                                                                                                                                                                                                                                                                                                                                                                                                                                                                                                                                                                                                                                                                                                                                                                                                                                                                                                                                                                                                                                                                                                                                                                                                                                                                                                                                                                                                                                                                                                                                                            |          |  |   |     |                     |               |   |                     |                      |   |                     |                            |   |                     |                        |   |                     |                              |   |                     |                   |   |                     |                                            |   |                     |                       |   |                     |                        |    |                      |                              |    |                      |                |    |                      |                     |    |                      |      |    |                      |              |    |                      |                               |    |                      |       |    |                      |                                                |    |                      |                    |    |                      |       |    |                      |      |
| 17       | babeadmitsymp_va__17                                                               | Umbilical cord problem (pain, discharge, etc.)                                           |                                                                                                                                                                                                                                                                                                                                                                                                                                                                                                                                                                                                                                                                                                                                                                                                                                                                                                                                                                                                                                                                                                                                                                                                                                                                                                                                                                                                                                                                                                                                                                                                                                                                                                                                            |          |  |   |     |                     |               |   |                     |                      |   |                     |                            |   |                     |                        |   |                     |                              |   |                     |                   |   |                     |                                            |   |                     |                       |   |                     |                        |    |                      |                              |    |                      |                |    |                      |                     |    |                      |      |    |                      |              |    |                      |                               |    |                      |       |    |                      |                                                |    |                      |                    |    |                      |       |    |                      |      |
| 18       | babeadmitsymp_va__18                                                               | Not gaining weight                                                                       |                                                                                                                                                                                                                                                                                                                                                                                                                                                                                                                                                                                                                                                                                                                                                                                                                                                                                                                                                                                                                                                                                                                                                                                                                                                                                                                                                                                                                                                                                                                                                                                                                                                                                                                                            |          |  |   |     |                     |               |   |                     |                      |   |                     |                            |   |                     |                        |   |                     |                              |   |                     |                   |   |                     |                                            |   |                     |                       |   |                     |                        |    |                      |                              |    |                      |                |    |                      |                     |    |                      |      |    |                      |              |    |                      |                               |    |                      |       |    |                      |                                                |    |                      |                    |    |                      |       |    |                      |      |
| 98       | babeadmitsymp_va__98                                                               | Other                                                                                    |                                                                                                                                                                                                                                                                                                                                                                                                                                                                                                                                                                                                                                                                                                                                                                                                                                                                                                                                                                                                                                                                                                                                                                                                                                                                                                                                                                                                                                                                                                                                                                                                                                                                                                                                            |          |  |   |     |                     |               |   |                     |                      |   |                     |                            |   |                     |                        |   |                     |                              |   |                     |                   |   |                     |                                            |   |                     |                       |   |                     |                        |    |                      |                              |    |                      |                |    |                      |                     |    |                      |      |    |                      |              |    |                      |                               |    |                      |       |    |                      |                                                |    |                      |                    |    |                      |       |    |                      |      |
| 99       | babeadmitsymp_va__99                                                               | None                                                                                     |                                                                                                                                                                                                                                                                                                                                                                                                                                                                                                                                                                                                                                                                                                                                                                                                                                                                                                                                                                                                                                                                                                                                                                                                                                                                                                                                                                                                                                                                                                                                                                                                                                                                                                                                            |          |  |   |     |                     |               |   |                     |                      |   |                     |                            |   |                     |                        |   |                     |                              |   |                     |                   |   |                     |                                            |   |                     |                       |   |                     |                        |    |                      |                              |    |                      |                |    |                      |                     |    |                      |      |    |                      |              |    |                      |                               |    |                      |       |    |                      |                                                |    |                      |                    |    |                      |       |    |                      |      |
| 591      | [babeadmitsympother_va]<br>Show the field ONLY if:<br>[babeadmitsymp_va(98)] = '1' | Other symptom:                                                                           | text                                                                                                                                                                                                                                                                                                                                                                                                                                                                                                                                                                                                                                                                                                                                                                                                                                                                                                                                                                                                                                                                                                                                                                                                                                                                                                                                                                                                                                                                                                                                                                                                                                                                                                                                       |          |  |   |     |                     |               |   |                     |                      |   |                     |                            |   |                     |                        |   |                     |                              |   |                     |                   |   |                     |                                            |   |                     |                       |   |                     |                        |    |                      |                              |    |                      |                |    |                      |                     |    |                      |      |    |                      |              |    |                      |                               |    |                      |       |    |                      |                                                |    |                      |                    |    |                      |       |    |                      |      |
| 592      | [transfusion_va]<br>Show the field ONLY if:<br>[babeadmit_va] = '1'                | Was baby transfused during any admission post-discharge                                  | <table border="1"> <tr> <td colspan="2">yesno</td> </tr> <tr> <td>1</td> <td>Yes</td> </tr> <tr> <td>0</td> <td>No</td> </tr> </table>                                                                                                                                                                                                                                                                                                                                                                                                                                                                                                                                                                                                                                                                                                                                                                                                                                                                                                                                                                                                                                                                                                                                                                                                                                                                                                                                                                                                                                                                                                                                                                                                     | yesno    |  | 1 | Yes | 0                   | No            |   |                     |                      |   |                     |                            |   |                     |                        |   |                     |                              |   |                     |                   |   |                     |                                            |   |                     |                       |   |                     |                        |    |                      |                              |    |                      |                |    |                      |                     |    |                      |      |    |                      |              |    |                      |                               |    |                      |       |    |                      |                                                |    |                      |                    |    |                      |       |    |                      |      |
| yesno    |                                                                                    |                                                                                          |                                                                                                                                                                                                                                                                                                                                                                                                                                                                                                                                                                                                                                                                                                                                                                                                                                                                                                                                                                                                                                                                                                                                                                                                                                                                                                                                                                                                                                                                                                                                                                                                                                                                                                                                            |          |  |   |     |                     |               |   |                     |                      |   |                     |                            |   |                     |                        |   |                     |                              |   |                     |                   |   |                     |                                            |   |                     |                       |   |                     |                        |    |                      |                              |    |                      |                |    |                      |                     |    |                      |      |    |                      |              |    |                      |                               |    |                      |       |    |                      |                                                |    |                      |                    |    |                      |       |    |                      |      |
| 1        | Yes                                                                                |                                                                                          |                                                                                                                                                                                                                                                                                                                                                                                                                                                                                                                                                                                                                                                                                                                                                                                                                                                                                                                                                                                                                                                                                                                                                                                                                                                                                                                                                                                                                                                                                                                                                                                                                                                                                                                                            |          |  |   |     |                     |               |   |                     |                      |   |                     |                            |   |                     |                        |   |                     |                              |   |                     |                   |   |                     |                                            |   |                     |                       |   |                     |                        |    |                      |                              |    |                      |                |    |                      |                     |    |                      |      |    |                      |              |    |                      |                               |    |                      |       |    |                      |                                                |    |                      |                    |    |                      |       |    |                      |      |
| 0        | No                                                                                 |                                                                                          |                                                                                                                                                                                                                                                                                                                                                                                                                                                                                                                                                                                                                                                                                                                                                                                                                                                                                                                                                                                                                                                                                                                                                                                                                                                                                                                                                                                                                                                                                                                                                                                                                                                                                                                                            |          |  |   |     |                     |               |   |                     |                      |   |                     |                            |   |                     |                        |   |                     |                              |   |                     |                   |   |                     |                                            |   |                     |                       |   |                     |                        |    |                      |                              |    |                      |                |    |                      |                     |    |                      |      |    |                      |              |    |                      |                               |    |                      |       |    |                      |                                                |    |                      |                    |    |                      |       |    |                      |      |
| 593      | [babeadmitcond_va]<br>Show the field ONLY if:<br>[babeadmit_va] = '1'              | Were you told the child had any of the following conditions?                             | <table border="1"> <tr> <td colspan="3">checkbox</td> </tr> <tr> <td>1</td> <td>babeadmitcond_va__1</td> <td>Sepsis</td> </tr> <tr> <td>2</td> <td>babeadmitcond_va__2</td> <td>Respiratory illness</td> </tr> <tr> <td>3</td> <td>babeadmitcond_va__3</td> <td>Oncologic disease (cancer)</td> </tr> <tr> <td>4</td> <td>babeadmitcond_va__4</td> <td>Congenital abnormality</td> </tr> <tr> <td>5</td> <td>babeadmitcond_va__5</td> <td>Endocrine/ metabolic disease</td> </tr> <tr> <td>6</td> <td>babeadmitcond_va__6</td> <td>Failure to thrive</td> </tr> <tr> <td>7</td> <td>babeadmitcond_va__7</td> <td>Trauma/ injury</td> </tr> <tr> <td>8</td> <td>babeadmitcond_va__8</td> <td>HIV</td> </tr> <tr> <td>9</td> <td>babeadmitcond_va__9</td> <td>Sickle Cell</td> </tr> <tr> <td>10</td> <td>babeadmitcond_va__10</td> <td>Anemia</td> </tr> <tr> <td>11</td> <td>babeadmitcond_va__11</td> <td>Dehydration</td> </tr> <tr> <td>98</td> <td>babeadmitcond_va__98</td> <td>Other</td> </tr> <tr> <td>99</td> <td>babeadmitcond_va__99</td> <td>None</td> </tr> </table>                                                                                                                                                                                                                                                                                                                                                                                                                                                                                                                                                                                                                                                          | checkbox |  |   | 1   | babeadmitcond_va__1 | Sepsis        | 2 | babeadmitcond_va__2 | Respiratory illness  | 3 | babeadmitcond_va__3 | Oncologic disease (cancer) | 4 | babeadmitcond_va__4 | Congenital abnormality | 5 | babeadmitcond_va__5 | Endocrine/ metabolic disease | 6 | babeadmitcond_va__6 | Failure to thrive | 7 | babeadmitcond_va__7 | Trauma/ injury                             | 8 | babeadmitcond_va__8 | HIV                   | 9 | babeadmitcond_va__9 | Sickle Cell            | 10 | babeadmitcond_va__10 | Anemia                       | 11 | babeadmitcond_va__11 | Dehydration    | 98 | babeadmitcond_va__98 | Other               | 99 | babeadmitcond_va__99 | None |    |                      |              |    |                      |                               |    |                      |       |    |                      |                                                |    |                      |                    |    |                      |       |    |                      |      |
| checkbox |                                                                                    |                                                                                          |                                                                                                                                                                                                                                                                                                                                                                                                                                                                                                                                                                                                                                                                                                                                                                                                                                                                                                                                                                                                                                                                                                                                                                                                                                                                                                                                                                                                                                                                                                                                                                                                                                                                                                                                            |          |  |   |     |                     |               |   |                     |                      |   |                     |                            |   |                     |                        |   |                     |                              |   |                     |                   |   |                     |                                            |   |                     |                       |   |                     |                        |    |                      |                              |    |                      |                |    |                      |                     |    |                      |      |    |                      |              |    |                      |                               |    |                      |       |    |                      |                                                |    |                      |                    |    |                      |       |    |                      |      |
| 1        | babeadmitcond_va__1                                                                | Sepsis                                                                                   |                                                                                                                                                                                                                                                                                                                                                                                                                                                                                                                                                                                                                                                                                                                                                                                                                                                                                                                                                                                                                                                                                                                                                                                                                                                                                                                                                                                                                                                                                                                                                                                                                                                                                                                                            |          |  |   |     |                     |               |   |                     |                      |   |                     |                            |   |                     |                        |   |                     |                              |   |                     |                   |   |                     |                                            |   |                     |                       |   |                     |                        |    |                      |                              |    |                      |                |    |                      |                     |    |                      |      |    |                      |              |    |                      |                               |    |                      |       |    |                      |                                                |    |                      |                    |    |                      |       |    |                      |      |
| 2        | babeadmitcond_va__2                                                                | Respiratory illness                                                                      |                                                                                                                                                                                                                                                                                                                                                                                                                                                                                                                                                                                                                                                                                                                                                                                                                                                                                                                                                                                                                                                                                                                                                                                                                                                                                                                                                                                                                                                                                                                                                                                                                                                                                                                                            |          |  |   |     |                     |               |   |                     |                      |   |                     |                            |   |                     |                        |   |                     |                              |   |                     |                   |   |                     |                                            |   |                     |                       |   |                     |                        |    |                      |                              |    |                      |                |    |                      |                     |    |                      |      |    |                      |              |    |                      |                               |    |                      |       |    |                      |                                                |    |                      |                    |    |                      |       |    |                      |      |
| 3        | babeadmitcond_va__3                                                                | Oncologic disease (cancer)                                                               |                                                                                                                                                                                                                                                                                                                                                                                                                                                                                                                                                                                                                                                                                                                                                                                                                                                                                                                                                                                                                                                                                                                                                                                                                                                                                                                                                                                                                                                                                                                                                                                                                                                                                                                                            |          |  |   |     |                     |               |   |                     |                      |   |                     |                            |   |                     |                        |   |                     |                              |   |                     |                   |   |                     |                                            |   |                     |                       |   |                     |                        |    |                      |                              |    |                      |                |    |                      |                     |    |                      |      |    |                      |              |    |                      |                               |    |                      |       |    |                      |                                                |    |                      |                    |    |                      |       |    |                      |      |
| 4        | babeadmitcond_va__4                                                                | Congenital abnormality                                                                   |                                                                                                                                                                                                                                                                                                                                                                                                                                                                                                                                                                                                                                                                                                                                                                                                                                                                                                                                                                                                                                                                                                                                                                                                                                                                                                                                                                                                                                                                                                                                                                                                                                                                                                                                            |          |  |   |     |                     |               |   |                     |                      |   |                     |                            |   |                     |                        |   |                     |                              |   |                     |                   |   |                     |                                            |   |                     |                       |   |                     |                        |    |                      |                              |    |                      |                |    |                      |                     |    |                      |      |    |                      |              |    |                      |                               |    |                      |       |    |                      |                                                |    |                      |                    |    |                      |       |    |                      |      |
| 5        | babeadmitcond_va__5                                                                | Endocrine/ metabolic disease                                                             |                                                                                                                                                                                                                                                                                                                                                                                                                                                                                                                                                                                                                                                                                                                                                                                                                                                                                                                                                                                                                                                                                                                                                                                                                                                                                                                                                                                                                                                                                                                                                                                                                                                                                                                                            |          |  |   |     |                     |               |   |                     |                      |   |                     |                            |   |                     |                        |   |                     |                              |   |                     |                   |   |                     |                                            |   |                     |                       |   |                     |                        |    |                      |                              |    |                      |                |    |                      |                     |    |                      |      |    |                      |              |    |                      |                               |    |                      |       |    |                      |                                                |    |                      |                    |    |                      |       |    |                      |      |
| 6        | babeadmitcond_va__6                                                                | Failure to thrive                                                                        |                                                                                                                                                                                                                                                                                                                                                                                                                                                                                                                                                                                                                                                                                                                                                                                                                                                                                                                                                                                                                                                                                                                                                                                                                                                                                                                                                                                                                                                                                                                                                                                                                                                                                                                                            |          |  |   |     |                     |               |   |                     |                      |   |                     |                            |   |                     |                        |   |                     |                              |   |                     |                   |   |                     |                                            |   |                     |                       |   |                     |                        |    |                      |                              |    |                      |                |    |                      |                     |    |                      |      |    |                      |              |    |                      |                               |    |                      |       |    |                      |                                                |    |                      |                    |    |                      |       |    |                      |      |
| 7        | babeadmitcond_va__7                                                                | Trauma/ injury                                                                           |                                                                                                                                                                                                                                                                                                                                                                                                                                                                                                                                                                                                                                                                                                                                                                                                                                                                                                                                                                                                                                                                                                                                                                                                                                                                                                                                                                                                                                                                                                                                                                                                                                                                                                                                            |          |  |   |     |                     |               |   |                     |                      |   |                     |                            |   |                     |                        |   |                     |                              |   |                     |                   |   |                     |                                            |   |                     |                       |   |                     |                        |    |                      |                              |    |                      |                |    |                      |                     |    |                      |      |    |                      |              |    |                      |                               |    |                      |       |    |                      |                                                |    |                      |                    |    |                      |       |    |                      |      |
| 8        | babeadmitcond_va__8                                                                | HIV                                                                                      |                                                                                                                                                                                                                                                                                                                                                                                                                                                                                                                                                                                                                                                                                                                                                                                                                                                                                                                                                                                                                                                                                                                                                                                                                                                                                                                                                                                                                                                                                                                                                                                                                                                                                                                                            |          |  |   |     |                     |               |   |                     |                      |   |                     |                            |   |                     |                        |   |                     |                              |   |                     |                   |   |                     |                                            |   |                     |                       |   |                     |                        |    |                      |                              |    |                      |                |    |                      |                     |    |                      |      |    |                      |              |    |                      |                               |    |                      |       |    |                      |                                                |    |                      |                    |    |                      |       |    |                      |      |
| 9        | babeadmitcond_va__9                                                                | Sickle Cell                                                                              |                                                                                                                                                                                                                                                                                                                                                                                                                                                                                                                                                                                                                                                                                                                                                                                                                                                                                                                                                                                                                                                                                                                                                                                                                                                                                                                                                                                                                                                                                                                                                                                                                                                                                                                                            |          |  |   |     |                     |               |   |                     |                      |   |                     |                            |   |                     |                        |   |                     |                              |   |                     |                   |   |                     |                                            |   |                     |                       |   |                     |                        |    |                      |                              |    |                      |                |    |                      |                     |    |                      |      |    |                      |              |    |                      |                               |    |                      |       |    |                      |                                                |    |                      |                    |    |                      |       |    |                      |      |
| 10       | babeadmitcond_va__10                                                               | Anemia                                                                                   |                                                                                                                                                                                                                                                                                                                                                                                                                                                                                                                                                                                                                                                                                                                                                                                                                                                                                                                                                                                                                                                                                                                                                                                                                                                                                                                                                                                                                                                                                                                                                                                                                                                                                                                                            |          |  |   |     |                     |               |   |                     |                      |   |                     |                            |   |                     |                        |   |                     |                              |   |                     |                   |   |                     |                                            |   |                     |                       |   |                     |                        |    |                      |                              |    |                      |                |    |                      |                     |    |                      |      |    |                      |              |    |                      |                               |    |                      |       |    |                      |                                                |    |                      |                    |    |                      |       |    |                      |      |
| 11       | babeadmitcond_va__11                                                               | Dehydration                                                                              |                                                                                                                                                                                                                                                                                                                                                                                                                                                                                                                                                                                                                                                                                                                                                                                                                                                                                                                                                                                                                                                                                                                                                                                                                                                                                                                                                                                                                                                                                                                                                                                                                                                                                                                                            |          |  |   |     |                     |               |   |                     |                      |   |                     |                            |   |                     |                        |   |                     |                              |   |                     |                   |   |                     |                                            |   |                     |                       |   |                     |                        |    |                      |                              |    |                      |                |    |                      |                     |    |                      |      |    |                      |              |    |                      |                               |    |                      |       |    |                      |                                                |    |                      |                    |    |                      |       |    |                      |      |
| 98       | babeadmitcond_va__98                                                               | Other                                                                                    |                                                                                                                                                                                                                                                                                                                                                                                                                                                                                                                                                                                                                                                                                                                                                                                                                                                                                                                                                                                                                                                                                                                                                                                                                                                                                                                                                                                                                                                                                                                                                                                                                                                                                                                                            |          |  |   |     |                     |               |   |                     |                      |   |                     |                            |   |                     |                        |   |                     |                              |   |                     |                   |   |                     |                                            |   |                     |                       |   |                     |                        |    |                      |                              |    |                      |                |    |                      |                     |    |                      |      |    |                      |              |    |                      |                               |    |                      |       |    |                      |                                                |    |                      |                    |    |                      |       |    |                      |      |
| 99       | babeadmitcond_va__99                                                               | None                                                                                     |                                                                                                                                                                                                                                                                                                                                                                                                                                                                                                                                                                                                                                                                                                                                                                                                                                                                                                                                                                                                                                                                                                                                                                                                                                                                                                                                                                                                                                                                                                                                                                                                                                                                                                                                            |          |  |   |     |                     |               |   |                     |                      |   |                     |                            |   |                     |                        |   |                     |                              |   |                     |                   |   |                     |                                            |   |                     |                       |   |                     |                        |    |                      |                              |    |                      |                |    |                      |                     |    |                      |      |    |                      |              |    |                      |                               |    |                      |       |    |                      |                                                |    |                      |                    |    |                      |       |    |                      |      |

|     |                                                                                                                                       |                                                                                                                                  |                                                                                                                                                                                                                                                                                                                                                                                                                                                          |   |                       |                                            |                   |                       |                                       |    |                       |                                                                 |            |                        |             |   |       |    |              |    |                   |
|-----|---------------------------------------------------------------------------------------------------------------------------------------|----------------------------------------------------------------------------------------------------------------------------------|----------------------------------------------------------------------------------------------------------------------------------------------------------------------------------------------------------------------------------------------------------------------------------------------------------------------------------------------------------------------------------------------------------------------------------------------------------|---|-----------------------|--------------------------------------------|-------------------|-----------------------|---------------------------------------|----|-----------------------|-----------------------------------------------------------------|------------|------------------------|-------------|---|-------|----|--------------|----|-------------------|
| 594 | [babeadmitcondother_va]<br>Show the field ONLY if:<br>[babeadmitcond_va(98)] = '1'                                                    | Other condition:                                                                                                                 | text                                                                                                                                                                                                                                                                                                                                                                                                                                                     |   |                       |                                            |                   |                       |                                       |    |                       |                                                                 |            |                        |             |   |       |    |              |    |                   |
| 595 | [matsymp_va]<br>Show the field ONLY if:<br>[babeadmit_va]=1                                                                           | Was the mother experiencing any significant illness at the time when baby was admitted?                                          | yesno<br><table border="1"> <tr><td>1</td><td>Yes</td></tr> <tr><td>0</td><td>No</td></tr> </table>                                                                                                                                                                                                                                                                                                                                                      | 1 | Yes                   | 0                                          | No                |                       |                                       |    |                       |                                                                 |            |                        |             |   |       |    |              |    |                   |
| 1   | Yes                                                                                                                                   |                                                                                                                                  |                                                                                                                                                                                                                                                                                                                                                                                                                                                          |   |                       |                                            |                   |                       |                                       |    |                       |                                                                 |            |                        |             |   |       |    |              |    |                   |
| 0   | No                                                                                                                                    |                                                                                                                                  |                                                                                                                                                                                                                                                                                                                                                                                                                                                          |   |                       |                                            |                   |                       |                                       |    |                       |                                                                 |            |                        |             |   |       |    |              |    |                   |
| 596 | [babefeed_va]                                                                                                                         | Was the baby being exclusively breastfed at the time they died?                                                                  | yesno<br><table border="1"> <tr><td>1</td><td>Yes</td></tr> <tr><td>0</td><td>No</td></tr> </table>                                                                                                                                                                                                                                                                                                                                                      | 1 | Yes                   | 0                                          | No                |                       |                                       |    |                       |                                                                 |            |                        |             |   |       |    |              |    |                   |
| 1   | Yes                                                                                                                                   |                                                                                                                                  |                                                                                                                                                                                                                                                                                                                                                                                                                                                          |   |                       |                                            |                   |                       |                                       |    |                       |                                                                 |            |                        |             |   |       |    |              |    |                   |
| 0   | No                                                                                                                                    |                                                                                                                                  |                                                                                                                                                                                                                                                                                                                                                                                                                                                          |   |                       |                                            |                   |                       |                                       |    |                       |                                                                 |            |                        |             |   |       |    |              |    |                   |
| 597 | [babeseek_va]<br>Show the field ONLY if:<br>[dispbb_neo][current-instance] != '3' and [admitdisposition_neo][current-instance] != '1' | Did you seek care for the newborn at a facility at any time after being home post-delivery that DID NOT result in an admission?  | yesno<br><table border="1"> <tr><td>1</td><td>Yes</td></tr> <tr><td>0</td><td>No</td></tr> </table>                                                                                                                                                                                                                                                                                                                                                      | 1 | Yes                   | 0                                          | No                |                       |                                       |    |                       |                                                                 |            |                        |             |   |       |    |              |    |                   |
| 1   | Yes                                                                                                                                   |                                                                                                                                  |                                                                                                                                                                                                                                                                                                                                                                                                                                                          |   |                       |                                            |                   |                       |                                       |    |                       |                                                                 |            |                        |             |   |       |    |              |    |                   |
| 0   | No                                                                                                                                    |                                                                                                                                  |                                                                                                                                                                                                                                                                                                                                                                                                                                                          |   |                       |                                            |                   |                       |                                       |    |                       |                                                                 |            |                        |             |   |       |    |              |    |                   |
| 598 | [babeseekage_va]<br>Show the field ONLY if:<br>[babeseek_va] = '1'                                                                    | How many days old was the baby during the first such visit?                                                                      | text (integer, Min: 1, Max: 42)                                                                                                                                                                                                                                                                                                                                                                                                                          |   |                       |                                            |                   |                       |                                       |    |                       |                                                                 |            |                        |             |   |       |    |              |    |                   |
| 599 | [babeseekpathway_va]<br>Show the field ONLY if:<br>[babeseek_va] = '1'                                                                | What was the care-seeking pathway for this visit?                                                                                | checkbox<br><table border="1"> <tr> <td>1</td> <td>babeseekpathway_va__1</td> <td>Routine well-baby visit identified problem</td> </tr> <tr> <td>2</td> <td>babeseekpathway_va__2</td> <td>Self referral due to parental concern</td> </tr> <tr> <td>3</td> <td>babeseekpathway_va__3</td> <td>Both self-referral and well-baby visit resulted in care seeking</td> </tr> <tr> <td>98</td> <td>babeseekpathway_va__98</td> <td>Other</td> </tr> </table> | 1 | babeseekpathway_va__1 | Routine well-baby visit identified problem | 2                 | babeseekpathway_va__2 | Self referral due to parental concern | 3  | babeseekpathway_va__3 | Both self-referral and well-baby visit resulted in care seeking | 98         | babeseekpathway_va__98 | Other       |   |       |    |              |    |                   |
| 1   | babeseekpathway_va__1                                                                                                                 | Routine well-baby visit identified problem                                                                                       |                                                                                                                                                                                                                                                                                                                                                                                                                                                          |   |                       |                                            |                   |                       |                                       |    |                       |                                                                 |            |                        |             |   |       |    |              |    |                   |
| 2   | babeseekpathway_va__2                                                                                                                 | Self referral due to parental concern                                                                                            |                                                                                                                                                                                                                                                                                                                                                                                                                                                          |   |                       |                                            |                   |                       |                                       |    |                       |                                                                 |            |                        |             |   |       |    |              |    |                   |
| 3   | babeseekpathway_va__3                                                                                                                 | Both self-referral and well-baby visit resulted in care seeking                                                                  |                                                                                                                                                                                                                                                                                                                                                                                                                                                          |   |                       |                                            |                   |                       |                                       |    |                       |                                                                 |            |                        |             |   |       |    |              |    |                   |
| 98  | babeseekpathway_va__98                                                                                                                | Other                                                                                                                            |                                                                                                                                                                                                                                                                                                                                                                                                                                                          |   |                       |                                            |                   |                       |                                       |    |                       |                                                                 |            |                        |             |   |       |    |              |    |                   |
| 600 | [babeseekpathwayother_va]<br>Show the field ONLY if:<br>[babeseekpathway_va(98)] = '1'                                                | Other pathway:                                                                                                                   | text                                                                                                                                                                                                                                                                                                                                                                                                                                                     |   |                       |                                            |                   |                       |                                       |    |                       |                                                                 |            |                        |             |   |       |    |              |    |                   |
| 601 | [id10077]                                                                                                                             | Section Header: <i>History of injuries/accidents</i><br>Did the baby suffer from any injury or accident that led to their death? | radio<br><table border="1"> <tr><td>1</td><td>Yes</td></tr> <tr><td>0</td><td>No</td></tr> <tr><td>99</td><td>Doesn't know</td></tr> <tr><td>88</td><td>Refused to answer</td></tr> </table>                                                                                                                                                                                                                                                             | 1 | Yes                   | 0                                          | No                | 99                    | Doesn't know                          | 88 | Refused to answer     |                                                                 |            |                        |             |   |       |    |              |    |                   |
| 1   | Yes                                                                                                                                   |                                                                                                                                  |                                                                                                                                                                                                                                                                                                                                                                                                                                                          |   |                       |                                            |                   |                       |                                       |    |                       |                                                                 |            |                        |             |   |       |    |              |    |                   |
| 0   | No                                                                                                                                    |                                                                                                                                  |                                                                                                                                                                                                                                                                                                                                                                                                                                                          |   |                       |                                            |                   |                       |                                       |    |                       |                                                                 |            |                        |             |   |       |    |              |    |                   |
| 99  | Doesn't know                                                                                                                          |                                                                                                                                  |                                                                                                                                                                                                                                                                                                                                                                                                                                                          |   |                       |                                            |                   |                       |                                       |    |                       |                                                                 |            |                        |             |   |       |    |              |    |                   |
| 88  | Refused to answer                                                                                                                     |                                                                                                                                  |                                                                                                                                                                                                                                                                                                                                                                                                                                                          |   |                       |                                            |                   |                       |                                       |    |                       |                                                                 |            |                        |             |   |       |    |              |    |                   |
| 602 | [id10079]<br>Show the field ONLY if:<br>[id10077]='1'                                                                                 | Section Header: <i>Injuries and accidents detail</i><br>Was it a road traffic accident?                                          | radio<br><table border="1"> <tr><td>1</td><td>Yes</td></tr> <tr><td>0</td><td>No</td></tr> <tr><td>99</td><td>Doesn't know</td></tr> <tr><td>88</td><td>Refused to answer</td></tr> </table>                                                                                                                                                                                                                                                             | 1 | Yes                   | 0                                          | No                | 99                    | Doesn't know                          | 88 | Refused to answer     |                                                                 |            |                        |             |   |       |    |              |    |                   |
| 1   | Yes                                                                                                                                   |                                                                                                                                  |                                                                                                                                                                                                                                                                                                                                                                                                                                                          |   |                       |                                            |                   |                       |                                       |    |                       |                                                                 |            |                        |             |   |       |    |              |    |                   |
| 0   | No                                                                                                                                    |                                                                                                                                  |                                                                                                                                                                                                                                                                                                                                                                                                                                                          |   |                       |                                            |                   |                       |                                       |    |                       |                                                                 |            |                        |             |   |       |    |              |    |                   |
| 99  | Doesn't know                                                                                                                          |                                                                                                                                  |                                                                                                                                                                                                                                                                                                                                                                                                                                                          |   |                       |                                            |                   |                       |                                       |    |                       |                                                                 |            |                        |             |   |       |    |              |    |                   |
| 88  | Refused to answer                                                                                                                     |                                                                                                                                  |                                                                                                                                                                                                                                                                                                                                                                                                                                                          |   |                       |                                            |                   |                       |                                       |    |                       |                                                                 |            |                        |             |   |       |    |              |    |                   |
| 603 | [id10081]<br>Show the field ONLY if:<br>[id10079] = '1'                                                                               | What was the counterpart that was hit during the road traffic accident?                                                          | radio<br><table border="1"> <tr><td>1</td><td>Pedestrian</td></tr> <tr><td>2</td><td>Stationary object</td></tr> <tr><td>3</td><td>Car or light vehicle</td></tr> <tr><td>4</td><td>Bus or heavy vehicle</td></tr> <tr><td>5</td><td>Motorcycle</td></tr> <tr><td>6</td><td>Pedal cycle</td></tr> <tr><td>7</td><td>Other</td></tr> <tr><td>99</td><td>Doesn't know</td></tr> <tr><td>88</td><td>Refused to answer</td></tr> </table>                    | 1 | Pedestrian            | 2                                          | Stationary object | 3                     | Car or light vehicle                  | 4  | Bus or heavy vehicle  | 5                                                               | Motorcycle | 6                      | Pedal cycle | 7 | Other | 99 | Doesn't know | 88 | Refused to answer |
| 1   | Pedestrian                                                                                                                            |                                                                                                                                  |                                                                                                                                                                                                                                                                                                                                                                                                                                                          |   |                       |                                            |                   |                       |                                       |    |                       |                                                                 |            |                        |             |   |       |    |              |    |                   |
| 2   | Stationary object                                                                                                                     |                                                                                                                                  |                                                                                                                                                                                                                                                                                                                                                                                                                                                          |   |                       |                                            |                   |                       |                                       |    |                       |                                                                 |            |                        |             |   |       |    |              |    |                   |
| 3   | Car or light vehicle                                                                                                                  |                                                                                                                                  |                                                                                                                                                                                                                                                                                                                                                                                                                                                          |   |                       |                                            |                   |                       |                                       |    |                       |                                                                 |            |                        |             |   |       |    |              |    |                   |
| 4   | Bus or heavy vehicle                                                                                                                  |                                                                                                                                  |                                                                                                                                                                                                                                                                                                                                                                                                                                                          |   |                       |                                            |                   |                       |                                       |    |                       |                                                                 |            |                        |             |   |       |    |              |    |                   |
| 5   | Motorcycle                                                                                                                            |                                                                                                                                  |                                                                                                                                                                                                                                                                                                                                                                                                                                                          |   |                       |                                            |                   |                       |                                       |    |                       |                                                                 |            |                        |             |   |       |    |              |    |                   |
| 6   | Pedal cycle                                                                                                                           |                                                                                                                                  |                                                                                                                                                                                                                                                                                                                                                                                                                                                          |   |                       |                                            |                   |                       |                                       |    |                       |                                                                 |            |                        |             |   |       |    |              |    |                   |
| 7   | Other                                                                                                                                 |                                                                                                                                  |                                                                                                                                                                                                                                                                                                                                                                                                                                                          |   |                       |                                            |                   |                       |                                       |    |                       |                                                                 |            |                        |             |   |       |    |              |    |                   |
| 99  | Doesn't know                                                                                                                          |                                                                                                                                  |                                                                                                                                                                                                                                                                                                                                                                                                                                                          |   |                       |                                            |                   |                       |                                       |    |                       |                                                                 |            |                        |             |   |       |    |              |    |                   |
| 88  | Refused to answer                                                                                                                     |                                                                                                                                  |                                                                                                                                                                                                                                                                                                                                                                                                                                                          |   |                       |                                            |                   |                       |                                       |    |                       |                                                                 |            |                        |             |   |       |    |              |    |                   |



|     |                                                                                                 |                                                                                                                                                                                              |                                                                                                         |
|-----|-------------------------------------------------------------------------------------------------|----------------------------------------------------------------------------------------------------------------------------------------------------------------------------------------------|---------------------------------------------------------------------------------------------------------|
| 604 | [id10082]<br>Show the field ONLY if:<br>[id10079] = '0' or [id10079] = '99' or [id10079] = '88' | Was the baby injured in a non-road transport accident?                                                                                                                                       | radio<br>1 Yes<br>0 No<br>99 Doesn't know<br>88 Refused to answer                                       |
| 605 | [id10083]<br>Show the field ONLY if:<br>[id10079] = '0' or [id10079] = '99' or [id10079] = '88' | Was the baby injured in a fall?<br><i>This includes accidents and cases where it is unknown if it was an accident or whether there was intentional violence.</i>                             | radio<br>1 Yes<br>0 No<br>99 Doesn't know<br>88 Refused to answer                                       |
| 606 | [id10084]<br>Show the field ONLY if:<br>[id10079] = '0' or [id10079] = '99' or [id10079] = '88' | Was there any poisoning?<br><i>This includes accidents and cases where it is unknown if it was an accident or whether there was intentional violence.</i>                                    | radio<br>1 Yes<br>0 No<br>99 Doesn't know<br>88 Refused to answer                                       |
| 607 | [id10085]<br>Show the field ONLY if:<br>[id10079] = '0' or [id10079] = '99' or [id10079] = '88' | Did the baby die of drowning?<br><i>This includes accidents and cases where it is unknown if it was an accident or whether there was intentional violence.</i>                               | radio<br>1 Yes<br>0 No<br>99 Doesn't know<br>88 Refused to answer                                       |
| 608 | [id10086]<br>Show the field ONLY if:<br>[id10079] = '0' or [id10079] = '99' or [id10079] = '88' | Was the baby injured by a bite or sting by venomous animal?<br><i>This includes accidents and cases where it is unknown if it was an accident or whether there was intentional violence.</i> | radio<br>1 Yes<br>0 No<br>99 Doesn't know<br>88 Refused to answer                                       |
| 609 | [id10087]<br>Show the field ONLY if:<br>[id10086] = '0' or [id10086] = '99' or [id10086] = '88' | Was the baby injured by an animal or insect (non-venomous)?                                                                                                                                  | radio<br>1 Yes<br>0 No<br>99 Doesn't know<br>88 Refused to answer                                       |
| 610 | [id10088]<br>Show the field ONLY if:<br>[id10086] = '1' or [id10087] = '1'                      | What was the animal/insect?                                                                                                                                                                  | radio<br>1 Dog<br>2 Snake<br>3 Insect or scorpion<br>4 Other<br>99 Doesn't know<br>88 Refused to answer |
| 611 | [id10089]<br>Show the field ONLY if:<br>[id10079] = '0' or [id10079] = '99' or [id10079] = '88' | Was the baby injured by burns/fire?                                                                                                                                                          | radio<br>1 Yes<br>0 No<br>99 Doesn't know<br>88 Refused to answer                                       |
| 612 | [id10090]<br>Show the field ONLY if:<br>[id10079] = '0' or [id10079] = '99' or [id10079] = '88' | Was the baby subject to violence (homicide, abuse)?                                                                                                                                          | radio<br>1 Yes<br>0 No<br>99 Doesn't know<br>88 Refused to answer                                       |

|     |                                                                                                 |                                                                                                               |                                                                   |
|-----|-------------------------------------------------------------------------------------------------|---------------------------------------------------------------------------------------------------------------|-------------------------------------------------------------------|
| 613 | [id10092]<br>Show the field ONLY if:<br>[id10079] = '0' or [id10079] = '99' or [id10079] = '88' | Was the baby stabbed, cut or pierced?                                                                         | radio<br>1 Yes<br>0 No<br>99 Doesn't know<br>88 Refused to answer |
| 614 | [id10093]<br>Show the field ONLY if:<br>[id10079] = '0' or [id10079] = '99' or [id10079] = '88' | Was the baby strangled?                                                                                       | radio<br>1 Yes<br>0 No<br>99 Doesn't know<br>88 Refused to answer |
| 615 | [id10094]<br>Show the field ONLY if:<br>[id10079] = '0' or [id10079] = '99' or [id10079] = '88' | Was the baby injured by a blunt force?                                                                        | radio<br>1 Yes<br>0 No<br>99 Doesn't know<br>88 Refused to answer |
| 616 | [id10095]<br>Show the field ONLY if:<br>[id10079] = '0' or [id10079] = '99' or [id10079] = '88' | Was the baby injured by a force of nature?                                                                    | radio<br>1 Yes<br>0 No<br>99 Doesn't know<br>88 Refused to answer |
| 617 | [id10096]<br>Show the field ONLY if:<br>[id10079] = '0' or [id10079] = '99' or [id10079] = '88' | Was it electrocution?                                                                                         | radio<br>1 Yes<br>0 No<br>99 Doesn't know<br>88 Refused to answer |
| 618 | [id10097]<br>Show the field ONLY if:<br>[id10079] = '0' or [id10079] = '99' or [id10079] = '88' | Did the baby encounter any other injury?                                                                      | radio<br>1 Yes<br>0 No<br>99 Doesn't know<br>88 Refused to answer |
| 619 | [id10098]<br>Show the field ONLY if:<br>[id10079] = '0' or [id10079] = '99' or [id10079] = '88' | Was the injury accidental?                                                                                    | radio<br>1 Yes<br>0 No<br>99 Doesn't know<br>88 Refused to answer |
| 620 | [id10100]<br>Show the field ONLY if:<br>[id10098] = '0' or [id10098] = '99' or [id10098] = '88' | Was the injury intentionally inflicted by someone else?                                                       | radio<br>1 Yes<br>0 No<br>99 Doesn't know<br>88 Refused to answer |
| 621 | [id10408]                                                                                       | Section Header: <i>Health History</i><br>Before the illness that led to death, was the baby growing normally? | radio<br>1 Yes<br>0 No<br>99 Doesn't know<br>88 Refused to answer |
| 622 | [id10101]<br>Show the field ONLY if:<br>[ageindays]<28                                          | How many days old was the baby when the fatal illness started?                                                | text                                                              |

|     |                                                         |                                                                                                                                                                                                                                                                                                  |                                                                                                                                                                                              |   |     |   |    |    |              |    |                   |
|-----|---------------------------------------------------------|--------------------------------------------------------------------------------------------------------------------------------------------------------------------------------------------------------------------------------------------------------------------------------------------------|----------------------------------------------------------------------------------------------------------------------------------------------------------------------------------------------|---|-----|---|----|----|--------------|----|-------------------|
| 623 | [id10352]<br>Show the field ONLY if:<br>[ageindays]>=28 | How old was the child when the fatal illness started? (in days or weeks)                                                                                                                                                                                                                         | text                                                                                                                                                                                         |   |     |   |    |    |              |    |                   |
| 624 | [id10120]                                               | Section Header: <i>Duration of Illness</i><br>For how long was the baby ill before death? (in days)                                                                                                                                                                                              | text (integer, Min: 0, Max: 300)                                                                                                                                                             |   |     |   |    |    |              |    |                   |
| 625 | [id10123]                                               | Did the baby die suddenly?<br><i>Suddenly means died unexpectedly within 24 hours of being in regular health.</i>                                                                                                                                                                                | radio<br><table border="1"> <tr><td>1</td><td>Yes</td></tr> <tr><td>0</td><td>No</td></tr> <tr><td>99</td><td>Doesn't know</td></tr> <tr><td>88</td><td>Refused to answer</td></tr> </table> | 1 | Yes | 0 | No | 99 | Doesn't know | 88 | Refused to answer |
| 1   | Yes                                                     |                                                                                                                                                                                                                                                                                                  |                                                                                                                                                                                              |   |     |   |    |    |              |    |                   |
| 0   | No                                                      |                                                                                                                                                                                                                                                                                                  |                                                                                                                                                                                              |   |     |   |    |    |              |    |                   |
| 99  | Doesn't know                                            |                                                                                                                                                                                                                                                                                                  |                                                                                                                                                                                              |   |     |   |    |    |              |    |                   |
| 88  | Refused to answer                                       |                                                                                                                                                                                                                                                                                                  |                                                                                                                                                                                              |   |     |   |    |    |              |    |                   |
| 626 | [id10125]<br>Show the field ONLY if:<br>[ageindays]>=28 | Section Header: <i>Medical History Associated With Final Illness Remind the respondent that we are asking for the diagnosis assessed by a doctor, health worker, or other health professional during the final illness.</i><br>Was there any diagnosis by a health professional of tuberculosis? | radio<br><table border="1"> <tr><td>1</td><td>Yes</td></tr> <tr><td>0</td><td>No</td></tr> <tr><td>99</td><td>Doesn't know</td></tr> <tr><td>88</td><td>Refused to answer</td></tr> </table> | 1 | Yes | 0 | No | 99 | Doesn't know | 88 | Refused to answer |
| 1   | Yes                                                     |                                                                                                                                                                                                                                                                                                  |                                                                                                                                                                                              |   |     |   |    |    |              |    |                   |
| 0   | No                                                      |                                                                                                                                                                                                                                                                                                  |                                                                                                                                                                                              |   |     |   |    |    |              |    |                   |
| 99  | Doesn't know                                            |                                                                                                                                                                                                                                                                                                  |                                                                                                                                                                                              |   |     |   |    |    |              |    |                   |
| 88  | Refused to answer                                       |                                                                                                                                                                                                                                                                                                  |                                                                                                                                                                                              |   |     |   |    |    |              |    |                   |
| 627 | [id10128]<br>Show the field ONLY if:<br>[ageindays]>=28 | Did the baby have a recent positive test by a health professional for malaria?                                                                                                                                                                                                                   | radio<br><table border="1"> <tr><td>1</td><td>Yes</td></tr> <tr><td>0</td><td>No</td></tr> <tr><td>99</td><td>Doesn't know</td></tr> <tr><td>88</td><td>Refused to answer</td></tr> </table> | 1 | Yes | 0 | No | 99 | Doesn't know | 88 | Refused to answer |
| 1   | Yes                                                     |                                                                                                                                                                                                                                                                                                  |                                                                                                                                                                                              |   |     |   |    |    |              |    |                   |
| 0   | No                                                      |                                                                                                                                                                                                                                                                                                  |                                                                                                                                                                                              |   |     |   |    |    |              |    |                   |
| 99  | Doesn't know                                            |                                                                                                                                                                                                                                                                                                  |                                                                                                                                                                                              |   |     |   |    |    |              |    |                   |
| 88  | Refused to answer                                       |                                                                                                                                                                                                                                                                                                  |                                                                                                                                                                                              |   |     |   |    |    |              |    |                   |
| 628 | [id10129]<br>Show the field ONLY if:<br>[ageindays]>=28 | Did the baby have a recent negative test by a health professional for malaria?                                                                                                                                                                                                                   | radio<br><table border="1"> <tr><td>1</td><td>Yes</td></tr> <tr><td>0</td><td>No</td></tr> <tr><td>99</td><td>Doesn't know</td></tr> <tr><td>88</td><td>Refused to answer</td></tr> </table> | 1 | Yes | 0 | No | 99 | Doesn't know | 88 | Refused to answer |
| 1   | Yes                                                     |                                                                                                                                                                                                                                                                                                  |                                                                                                                                                                                              |   |     |   |    |    |              |    |                   |
| 0   | No                                                      |                                                                                                                                                                                                                                                                                                  |                                                                                                                                                                                              |   |     |   |    |    |              |    |                   |
| 99  | Doesn't know                                            |                                                                                                                                                                                                                                                                                                  |                                                                                                                                                                                              |   |     |   |    |    |              |    |                   |
| 88  | Refused to answer                                       |                                                                                                                                                                                                                                                                                                  |                                                                                                                                                                                              |   |     |   |    |    |              |    |                   |
| 629 | [id10131]<br>Show the field ONLY if:<br>[ageindays]>=28 | Was there any diagnosis by a health professional of measles?                                                                                                                                                                                                                                     | radio<br><table border="1"> <tr><td>1</td><td>Yes</td></tr> <tr><td>0</td><td>No</td></tr> <tr><td>99</td><td>Doesn't know</td></tr> <tr><td>88</td><td>Refused to answer</td></tr> </table> | 1 | Yes | 0 | No | 99 | Doesn't know | 88 | Refused to answer |
| 1   | Yes                                                     |                                                                                                                                                                                                                                                                                                  |                                                                                                                                                                                              |   |     |   |    |    |              |    |                   |
| 0   | No                                                      |                                                                                                                                                                                                                                                                                                  |                                                                                                                                                                                              |   |     |   |    |    |              |    |                   |
| 99  | Doesn't know                                            |                                                                                                                                                                                                                                                                                                  |                                                                                                                                                                                              |   |     |   |    |    |              |    |                   |
| 88  | Refused to answer                                       |                                                                                                                                                                                                                                                                                                  |                                                                                                                                                                                              |   |     |   |    |    |              |    |                   |
| 630 | [id10133]<br>Show the field ONLY if:<br>[ageindays]>=28 | Was there any diagnosis by a health professional of heart disease?                                                                                                                                                                                                                               | radio<br><table border="1"> <tr><td>1</td><td>Yes</td></tr> <tr><td>0</td><td>No</td></tr> <tr><td>99</td><td>Doesn't know</td></tr> <tr><td>88</td><td>Refused to answer</td></tr> </table> | 1 | Yes | 0 | No | 99 | Doesn't know | 88 | Refused to answer |
| 1   | Yes                                                     |                                                                                                                                                                                                                                                                                                  |                                                                                                                                                                                              |   |     |   |    |    |              |    |                   |
| 0   | No                                                      |                                                                                                                                                                                                                                                                                                  |                                                                                                                                                                                              |   |     |   |    |    |              |    |                   |
| 99  | Doesn't know                                            |                                                                                                                                                                                                                                                                                                  |                                                                                                                                                                                              |   |     |   |    |    |              |    |                   |
| 88  | Refused to answer                                       |                                                                                                                                                                                                                                                                                                  |                                                                                                                                                                                              |   |     |   |    |    |              |    |                   |
| 631 | [id10134]<br>Show the field ONLY if:<br>[ageindays]>=28 | Was there any diagnosis by a health professional of diabetes?                                                                                                                                                                                                                                    | radio<br><table border="1"> <tr><td>1</td><td>Yes</td></tr> <tr><td>0</td><td>No</td></tr> <tr><td>99</td><td>Doesn't know</td></tr> <tr><td>88</td><td>Refused to answer</td></tr> </table> | 1 | Yes | 0 | No | 99 | Doesn't know | 88 | Refused to answer |
| 1   | Yes                                                     |                                                                                                                                                                                                                                                                                                  |                                                                                                                                                                                              |   |     |   |    |    |              |    |                   |
| 0   | No                                                      |                                                                                                                                                                                                                                                                                                  |                                                                                                                                                                                              |   |     |   |    |    |              |    |                   |
| 99  | Doesn't know                                            |                                                                                                                                                                                                                                                                                                  |                                                                                                                                                                                              |   |     |   |    |    |              |    |                   |
| 88  | Refused to answer                                       |                                                                                                                                                                                                                                                                                                  |                                                                                                                                                                                              |   |     |   |    |    |              |    |                   |
| 632 | [id10135]<br>Show the field ONLY if:<br>[ageindays]>=28 | Was there any diagnosis by a health professional of asthma?                                                                                                                                                                                                                                      | radio<br><table border="1"> <tr><td>1</td><td>Yes</td></tr> <tr><td>0</td><td>No</td></tr> <tr><td>99</td><td>Doesn't know</td></tr> <tr><td>88</td><td>Refused to answer</td></tr> </table> | 1 | Yes | 0 | No | 99 | Doesn't know | 88 | Refused to answer |
| 1   | Yes                                                     |                                                                                                                                                                                                                                                                                                  |                                                                                                                                                                                              |   |     |   |    |    |              |    |                   |
| 0   | No                                                      |                                                                                                                                                                                                                                                                                                  |                                                                                                                                                                                              |   |     |   |    |    |              |    |                   |
| 99  | Doesn't know                                            |                                                                                                                                                                                                                                                                                                  |                                                                                                                                                                                              |   |     |   |    |    |              |    |                   |
| 88  | Refused to answer                                       |                                                                                                                                                                                                                                                                                                  |                                                                                                                                                                                              |   |     |   |    |    |              |    |                   |
| 633 | [id10136]<br>Show the field ONLY if:<br>[ageindays]>=28 | Was there any diagnosis by a health professional of epilepsy?                                                                                                                                                                                                                                    | radio<br><table border="1"> <tr><td>1</td><td>Yes</td></tr> <tr><td>0</td><td>No</td></tr> <tr><td>99</td><td>Doesn't know</td></tr> <tr><td>88</td><td>Refused to answer</td></tr> </table> | 1 | Yes | 0 | No | 99 | Doesn't know | 88 | Refused to answer |
| 1   | Yes                                                     |                                                                                                                                                                                                                                                                                                  |                                                                                                                                                                                              |   |     |   |    |    |              |    |                   |
| 0   | No                                                      |                                                                                                                                                                                                                                                                                                  |                                                                                                                                                                                              |   |     |   |    |    |              |    |                   |
| 99  | Doesn't know                                            |                                                                                                                                                                                                                                                                                                  |                                                                                                                                                                                              |   |     |   |    |    |              |    |                   |
| 88  | Refused to answer                                       |                                                                                                                                                                                                                                                                                                  |                                                                                                                                                                                              |   |     |   |    |    |              |    |                   |

|     |                                                                               |                                                                                                               |                                                                                      |
|-----|-------------------------------------------------------------------------------|---------------------------------------------------------------------------------------------------------------|--------------------------------------------------------------------------------------|
| 634 | [id10137]<br>Show the field ONLY if:<br>[ageindays]>=28                       | Was there any diagnosis by a health professional of cancer?                                                   | radio<br>1 Yes<br>0 No<br>99 Doesn't know<br>88 Refused to answer                    |
| 635 | [id10142]<br>Show the field ONLY if:<br>[ageindays]>=28                       | Was there any diagnosis by a health professional of sickle cell disease?                                      | radio<br>1 Yes<br>0 No<br>99 Doesn't know<br>88 Refused to answer                    |
| 636 | [id10143]<br>Show the field ONLY if:<br>[ageindays]>=28                       | Was there any diagnosis by a health professional of kidney disease?                                           | radio<br>1 Yes<br>0 No<br>99 Doesn't know<br>88 Refused to answer                    |
| 637 | [id10144]<br>Show the field ONLY if:<br>[ageindays]>=28                       | Was there any diagnosis by a health professional of liver disease?                                            | radio<br>1 Yes<br>0 No<br>99 Doesn't know<br>88 Refused to answer                    |
| 638 | [id10147]                                                                     | Section Header: <i>General Signs and Symptoms Associated with Final Illness</i><br>Did the baby have a fever? | radio<br>1 Yes<br>0 No<br>99 Doesn't know<br>88 Refused to answer                    |
| 639 | [id10147_measure]<br>Show the field ONLY if:<br>[id10147]='1'                 | Was the baby's temperature measured using a device?<br><i>i.e. thermometer</i>                                | yesno<br>1 Yes<br>0 No                                                               |
| 640 | [id10147_temp]<br>Show the field ONLY if:<br>[id10147_measure]='1'            | What was the baby's temperature? (in Celsius)                                                                 | yesno<br>1 Yes<br>0 No                                                               |
| 641 | [id10148]<br>Show the field ONLY if:<br>[id10147]='1'                         | How long did the fever last? (in days)                                                                        | text (number)                                                                        |
| 642 | [id10149]<br>Show the field ONLY if:<br>[id10147]='1'                         | Did the fever continue until death?                                                                           | radio<br>1 Yes<br>0 No<br>99 Doesn't know<br>88 Refused to answer                    |
| 643 | [id10150]<br>Show the field ONLY if:<br>[id10147]='1' and [ageindays]<br>>=28 | How severe was the fever?                                                                                     | radio<br>1 Mild<br>2 Moderate<br>3 Severe<br>99 Doesn't know<br>88 Refused to answer |

|     |                                                                               |                                                      |                                                                                                                                                                                                                                                       |   |            |   |            |    |               |    |                   |    |                   |
|-----|-------------------------------------------------------------------------------|------------------------------------------------------|-------------------------------------------------------------------------------------------------------------------------------------------------------------------------------------------------------------------------------------------------------|---|------------|---|------------|----|---------------|----|-------------------|----|-------------------|
| 644 | [id10151]<br>Show the field ONLY if:<br>[id10147]='1' and [ageindays]<br>>=28 | What was the pattern of the fever?                   | radio<br><table border="1"> <tr><td>1</td><td>Continuous</td></tr> <tr><td>2</td><td>On and off</td></tr> <tr><td>3</td><td>Only at night</td></tr> <tr><td>99</td><td>Doesn't know</td></tr> <tr><td>88</td><td>Refused to answer</td></tr> </table> | 1 | Continuous | 2 | On and off | 3  | Only at night | 99 | Doesn't know      | 88 | Refused to answer |
| 1   | Continuous                                                                    |                                                      |                                                                                                                                                                                                                                                       |   |            |   |            |    |               |    |                   |    |                   |
| 2   | On and off                                                                    |                                                      |                                                                                                                                                                                                                                                       |   |            |   |            |    |               |    |                   |    |                   |
| 3   | Only at night                                                                 |                                                      |                                                                                                                                                                                                                                                       |   |            |   |            |    |               |    |                   |    |                   |
| 99  | Doesn't know                                                                  |                                                      |                                                                                                                                                                                                                                                       |   |            |   |            |    |               |    |                   |    |                   |
| 88  | Refused to answer                                                             |                                                      |                                                                                                                                                                                                                                                       |   |            |   |            |    |               |    |                   |    |                   |
| 645 | [id10152]<br>Show the field ONLY if:<br>[ageindays]>=28                       | Did the baby have night sweats?                      | radio<br><table border="1"> <tr><td>1</td><td>Yes</td></tr> <tr><td>0</td><td>No</td></tr> <tr><td>99</td><td>Doesn't know</td></tr> <tr><td>88</td><td>Refused to answer</td></tr> </table>                                                          | 1 | Yes        | 0 | No         | 99 | Doesn't know  | 88 | Refused to answer |    |                   |
| 1   | Yes                                                                           |                                                      |                                                                                                                                                                                                                                                       |   |            |   |            |    |               |    |                   |    |                   |
| 0   | No                                                                            |                                                      |                                                                                                                                                                                                                                                       |   |            |   |            |    |               |    |                   |    |                   |
| 99  | Doesn't know                                                                  |                                                      |                                                                                                                                                                                                                                                       |   |            |   |            |    |               |    |                   |    |                   |
| 88  | Refused to answer                                                             |                                                      |                                                                                                                                                                                                                                                       |   |            |   |            |    |               |    |                   |    |                   |
| 646 | [id10153]                                                                     | Did the baby have a cough?                           | radio<br><table border="1"> <tr><td>1</td><td>Yes</td></tr> <tr><td>0</td><td>No</td></tr> <tr><td>99</td><td>Doesn't know</td></tr> <tr><td>88</td><td>Refused to answer</td></tr> </table>                                                          | 1 | Yes        | 0 | No         | 99 | Doesn't know  | 88 | Refused to answer |    |                   |
| 1   | Yes                                                                           |                                                      |                                                                                                                                                                                                                                                       |   |            |   |            |    |               |    |                   |    |                   |
| 0   | No                                                                            |                                                      |                                                                                                                                                                                                                                                       |   |            |   |            |    |               |    |                   |    |                   |
| 99  | Doesn't know                                                                  |                                                      |                                                                                                                                                                                                                                                       |   |            |   |            |    |               |    |                   |    |                   |
| 88  | Refused to answer                                                             |                                                      |                                                                                                                                                                                                                                                       |   |            |   |            |    |               |    |                   |    |                   |
| 647 | [id10154]<br>Show the field ONLY if:<br>[id10153]='1' and [ageindays]<br>>=28 | For how long did the baby have a cough? (in days)    | text (number)                                                                                                                                                                                                                                         |   |            |   |            |    |               |    |                   |    |                   |
| 648 | [id10155]<br>Show the field ONLY if:<br>[id10153]='1' and [ageindays]<br>>=28 | Was the cough productive, with sputum?               | radio<br><table border="1"> <tr><td>1</td><td>Yes</td></tr> <tr><td>0</td><td>No</td></tr> <tr><td>99</td><td>Doesn't know</td></tr> <tr><td>88</td><td>Refused to answer</td></tr> </table>                                                          | 1 | Yes        | 0 | No         | 99 | Doesn't know  | 88 | Refused to answer |    |                   |
| 1   | Yes                                                                           |                                                      |                                                                                                                                                                                                                                                       |   |            |   |            |    |               |    |                   |    |                   |
| 0   | No                                                                            |                                                      |                                                                                                                                                                                                                                                       |   |            |   |            |    |               |    |                   |    |                   |
| 99  | Doesn't know                                                                  |                                                      |                                                                                                                                                                                                                                                       |   |            |   |            |    |               |    |                   |    |                   |
| 88  | Refused to answer                                                             |                                                      |                                                                                                                                                                                                                                                       |   |            |   |            |    |               |    |                   |    |                   |
| 649 | [id10156]<br>Show the field ONLY if:<br>[id10153]='1' and [ageindays]<br>>=28 | Was the cough very severe?                           | radio<br><table border="1"> <tr><td>1</td><td>Yes</td></tr> <tr><td>0</td><td>No</td></tr> <tr><td>99</td><td>Doesn't know</td></tr> <tr><td>88</td><td>Refused to answer</td></tr> </table>                                                          | 1 | Yes        | 0 | No         | 99 | Doesn't know  | 88 | Refused to answer |    |                   |
| 1   | Yes                                                                           |                                                      |                                                                                                                                                                                                                                                       |   |            |   |            |    |               |    |                   |    |                   |
| 0   | No                                                                            |                                                      |                                                                                                                                                                                                                                                       |   |            |   |            |    |               |    |                   |    |                   |
| 99  | Doesn't know                                                                  |                                                      |                                                                                                                                                                                                                                                       |   |            |   |            |    |               |    |                   |    |                   |
| 88  | Refused to answer                                                             |                                                      |                                                                                                                                                                                                                                                       |   |            |   |            |    |               |    |                   |    |                   |
| 650 | [id10157]<br>Show the field ONLY if:<br>[id10153]='1' and [ageindays]<br>>=28 | Did the baby cough up blood?                         | radio<br><table border="1"> <tr><td>1</td><td>Yes</td></tr> <tr><td>0</td><td>No</td></tr> <tr><td>99</td><td>Doesn't know</td></tr> <tr><td>88</td><td>Refused to answer</td></tr> </table>                                                          | 1 | Yes        | 0 | No         | 99 | Doesn't know  | 88 | Refused to answer |    |                   |
| 1   | Yes                                                                           |                                                      |                                                                                                                                                                                                                                                       |   |            |   |            |    |               |    |                   |    |                   |
| 0   | No                                                                            |                                                      |                                                                                                                                                                                                                                                       |   |            |   |            |    |               |    |                   |    |                   |
| 99  | Doesn't know                                                                  |                                                      |                                                                                                                                                                                                                                                       |   |            |   |            |    |               |    |                   |    |                   |
| 88  | Refused to answer                                                             |                                                      |                                                                                                                                                                                                                                                       |   |            |   |            |    |               |    |                   |    |                   |
| 651 | [id10158]<br>Show the field ONLY if:<br>[id10153]='1' and [ageindays]<br>>=28 | Did the baby make a whooping sound when coughing?    | radio<br><table border="1"> <tr><td>1</td><td>Yes</td></tr> <tr><td>0</td><td>No</td></tr> <tr><td>99</td><td>Doesn't know</td></tr> <tr><td>88</td><td>Refused to answer</td></tr> </table>                                                          | 1 | Yes        | 0 | No         | 99 | Doesn't know  | 88 | Refused to answer |    |                   |
| 1   | Yes                                                                           |                                                      |                                                                                                                                                                                                                                                       |   |            |   |            |    |               |    |                   |    |                   |
| 0   | No                                                                            |                                                      |                                                                                                                                                                                                                                                       |   |            |   |            |    |               |    |                   |    |                   |
| 99  | Doesn't know                                                                  |                                                      |                                                                                                                                                                                                                                                       |   |            |   |            |    |               |    |                   |    |                   |
| 88  | Refused to answer                                                             |                                                      |                                                                                                                                                                                                                                                       |   |            |   |            |    |               |    |                   |    |                   |
| 652 | [id10159]                                                                     | Did the baby have any difficulty breathing?          | radio<br><table border="1"> <tr><td>1</td><td>Yes</td></tr> <tr><td>0</td><td>No</td></tr> <tr><td>99</td><td>Doesn't know</td></tr> <tr><td>88</td><td>Refused to answer</td></tr> </table>                                                          | 1 | Yes        | 0 | No         | 99 | Doesn't know  | 88 | Refused to answer |    |                   |
| 1   | Yes                                                                           |                                                      |                                                                                                                                                                                                                                                       |   |            |   |            |    |               |    |                   |    |                   |
| 0   | No                                                                            |                                                      |                                                                                                                                                                                                                                                       |   |            |   |            |    |               |    |                   |    |                   |
| 99  | Doesn't know                                                                  |                                                      |                                                                                                                                                                                                                                                       |   |            |   |            |    |               |    |                   |    |                   |
| 88  | Refused to answer                                                             |                                                      |                                                                                                                                                                                                                                                       |   |            |   |            |    |               |    |                   |    |                   |
| 653 | [id10161]<br>Show the field ONLY if:<br>[id10159]='1'                         | For how many days did the difficulty breathing last? | text (number)                                                                                                                                                                                                                                         |   |            |   |            |    |               |    |                   |    |                   |

|     |                                                                               |                                                                                                                                          |                                                                                                                                                                                                                                                                                                                                                                                                   |   |            |         |            |            |              |    |                   |          |   |            |    |    |             |              |    |             |                   |
|-----|-------------------------------------------------------------------------------|------------------------------------------------------------------------------------------------------------------------------------------|---------------------------------------------------------------------------------------------------------------------------------------------------------------------------------------------------------------------------------------------------------------------------------------------------------------------------------------------------------------------------------------------------|---|------------|---------|------------|------------|--------------|----|-------------------|----------|---|------------|----|----|-------------|--------------|----|-------------|-------------------|
| 654 | [id10165]<br>Show the field ONLY if:<br>[id10159]='1' and [ageindays]<br>>=28 | Was the difficulty continuous or on and off?                                                                                             | radio<br><table border="1"> <tr><td>1</td><td>Continuous</td></tr> <tr><td>2</td><td>On and off</td></tr> <tr><td>99</td><td>Doesn't know</td></tr> <tr><td>88</td><td>Refused to answer</td></tr> </table>                                                                                                                                                                                       | 1 | Continuous | 2       | On and off | 99         | Doesn't know | 88 | Refused to answer |          |   |            |    |    |             |              |    |             |                   |
| 1   | Continuous                                                                    |                                                                                                                                          |                                                                                                                                                                                                                                                                                                                                                                                                   |   |            |         |            |            |              |    |                   |          |   |            |    |    |             |              |    |             |                   |
| 2   | On and off                                                                    |                                                                                                                                          |                                                                                                                                                                                                                                                                                                                                                                                                   |   |            |         |            |            |              |    |                   |          |   |            |    |    |             |              |    |             |                   |
| 99  | Doesn't know                                                                  |                                                                                                                                          |                                                                                                                                                                                                                                                                                                                                                                                                   |   |            |         |            |            |              |    |                   |          |   |            |    |    |             |              |    |             |                   |
| 88  | Refused to answer                                                             |                                                                                                                                          |                                                                                                                                                                                                                                                                                                                                                                                                   |   |            |         |            |            |              |    |                   |          |   |            |    |    |             |              |    |             |                   |
| 655 | [id10166]                                                                     | During the illness that led to death, did the baby have fast breathing?                                                                  | radio<br><table border="1"> <tr><td>1</td><td>Yes</td></tr> <tr><td>0</td><td>No</td></tr> <tr><td>99</td><td>Doesn't know</td></tr> <tr><td>88</td><td>Refused to answer</td></tr> </table>                                                                                                                                                                                                      | 1 | Yes        | 0       | No         | 99         | Doesn't know | 88 | Refused to answer |          |   |            |    |    |             |              |    |             |                   |
| 1   | Yes                                                                           |                                                                                                                                          |                                                                                                                                                                                                                                                                                                                                                                                                   |   |            |         |            |            |              |    |                   |          |   |            |    |    |             |              |    |             |                   |
| 0   | No                                                                            |                                                                                                                                          |                                                                                                                                                                                                                                                                                                                                                                                                   |   |            |         |            |            |              |    |                   |          |   |            |    |    |             |              |    |             |                   |
| 99  | Doesn't know                                                                  |                                                                                                                                          |                                                                                                                                                                                                                                                                                                                                                                                                   |   |            |         |            |            |              |    |                   |          |   |            |    |    |             |              |    |             |                   |
| 88  | Refused to answer                                                             |                                                                                                                                          |                                                                                                                                                                                                                                                                                                                                                                                                   |   |            |         |            |            |              |    |                   |          |   |            |    |    |             |              |    |             |                   |
| 656 | [id10167]<br>Show the field ONLY if:<br>[id10166]='1'                         | For how many days did the fast breathing last? (in days)                                                                                 | text (number)                                                                                                                                                                                                                                                                                                                                                                                     |   |            |         |            |            |              |    |                   |          |   |            |    |    |             |              |    |             |                   |
| 657 | [id10168]                                                                     | Did the baby have breathlessness?                                                                                                        | radio<br><table border="1"> <tr><td>1</td><td>Yes</td></tr> <tr><td>0</td><td>No</td></tr> <tr><td>99</td><td>Doesn't know</td></tr> <tr><td>88</td><td>Refused to answer</td></tr> </table>                                                                                                                                                                                                      | 1 | Yes        | 0       | No         | 99         | Doesn't know | 88 | Refused to answer |          |   |            |    |    |             |              |    |             |                   |
| 1   | Yes                                                                           |                                                                                                                                          |                                                                                                                                                                                                                                                                                                                                                                                                   |   |            |         |            |            |              |    |                   |          |   |            |    |    |             |              |    |             |                   |
| 0   | No                                                                            |                                                                                                                                          |                                                                                                                                                                                                                                                                                                                                                                                                   |   |            |         |            |            |              |    |                   |          |   |            |    |    |             |              |    |             |                   |
| 99  | Doesn't know                                                                  |                                                                                                                                          |                                                                                                                                                                                                                                                                                                                                                                                                   |   |            |         |            |            |              |    |                   |          |   |            |    |    |             |              |    |             |                   |
| 88  | Refused to answer                                                             |                                                                                                                                          |                                                                                                                                                                                                                                                                                                                                                                                                   |   |            |         |            |            |              |    |                   |          |   |            |    |    |             |              |    |             |                   |
| 658 | [id10169]<br>Show the field ONLY if:<br>[id10168]='1'                         | For how many days did the baby have breathlessness?                                                                                      | text (number)                                                                                                                                                                                                                                                                                                                                                                                     |   |            |         |            |            |              |    |                   |          |   |            |    |    |             |              |    |             |                   |
| 659 | [id10172]                                                                     | Did you see the lower chest wall/ribs being pulled in as the child breathed in?                                                          | radio<br><table border="1"> <tr><td>1</td><td>Yes</td></tr> <tr><td>0</td><td>No</td></tr> <tr><td>99</td><td>Doesn't know</td></tr> <tr><td>88</td><td>Refused to answer</td></tr> </table>                                                                                                                                                                                                      | 1 | Yes        | 0       | No         | 99         | Doesn't know | 88 | Refused to answer |          |   |            |    |    |             |              |    |             |                   |
| 1   | Yes                                                                           |                                                                                                                                          |                                                                                                                                                                                                                                                                                                                                                                                                   |   |            |         |            |            |              |    |                   |          |   |            |    |    |             |              |    |             |                   |
| 0   | No                                                                            |                                                                                                                                          |                                                                                                                                                                                                                                                                                                                                                                                                   |   |            |         |            |            |              |    |                   |          |   |            |    |    |             |              |    |             |                   |
| 99  | Doesn't know                                                                  |                                                                                                                                          |                                                                                                                                                                                                                                                                                                                                                                                                   |   |            |         |            |            |              |    |                   |          |   |            |    |    |             |              |    |             |                   |
| 88  | Refused to answer                                                             |                                                                                                                                          |                                                                                                                                                                                                                                                                                                                                                                                                   |   |            |         |            |            |              |    |                   |          |   |            |    |    |             |              |    |             |                   |
| 660 | [id10173]                                                                     | During the illness that led to death did their breathing sound like any of the following:                                                | checkbox<br><table border="1"> <tr><td>1</td><td>id10173__1</td><td>Stridor</td></tr> <tr><td>2</td><td>id10173__2</td><td>Grunting</td></tr> <tr><td>3</td><td>id10173__3</td><td>Wheezing</td></tr> <tr><td>4</td><td>id10173__4</td><td>No</td></tr> <tr><td>99</td><td>id10173__99</td><td>Doesn't know</td></tr> <tr><td>88</td><td>id10173__88</td><td>Refused to answer</td></tr> </table> | 1 | id10173__1 | Stridor | 2          | id10173__2 | Grunting     | 3  | id10173__3        | Wheezing | 4 | id10173__4 | No | 99 | id10173__99 | Doesn't know | 88 | id10173__88 | Refused to answer |
| 1   | id10173__1                                                                    | Stridor                                                                                                                                  |                                                                                                                                                                                                                                                                                                                                                                                                   |   |            |         |            |            |              |    |                   |          |   |            |    |    |             |              |    |             |                   |
| 2   | id10173__2                                                                    | Grunting                                                                                                                                 |                                                                                                                                                                                                                                                                                                                                                                                                   |   |            |         |            |            |              |    |                   |          |   |            |    |    |             |              |    |             |                   |
| 3   | id10173__3                                                                    | Wheezing                                                                                                                                 |                                                                                                                                                                                                                                                                                                                                                                                                   |   |            |         |            |            |              |    |                   |          |   |            |    |    |             |              |    |             |                   |
| 4   | id10173__4                                                                    | No                                                                                                                                       |                                                                                                                                                                                                                                                                                                                                                                                                   |   |            |         |            |            |              |    |                   |          |   |            |    |    |             |              |    |             |                   |
| 99  | id10173__99                                                                   | Doesn't know                                                                                                                             |                                                                                                                                                                                                                                                                                                                                                                                                   |   |            |         |            |            |              |    |                   |          |   |            |    |    |             |              |    |             |                   |
| 88  | id10173__88                                                                   | Refused to answer                                                                                                                        |                                                                                                                                                                                                                                                                                                                                                                                                   |   |            |         |            |            |              |    |                   |          |   |            |    |    |             |              |    |             |                   |
| 661 | [id10181]                                                                     | Did the baby have more frequent loose or liquid stools than usual?<br><i>In other words, was the stool was "watery" or "water-like"?</i> | radio<br><table border="1"> <tr><td>1</td><td>Yes</td></tr> <tr><td>0</td><td>No</td></tr> <tr><td>99</td><td>Doesn't know</td></tr> <tr><td>88</td><td>Refused to answer</td></tr> </table>                                                                                                                                                                                                      | 1 | Yes        | 0       | No         | 99         | Doesn't know | 88 | Refused to answer |          |   |            |    |    |             |              |    |             |                   |
| 1   | Yes                                                                           |                                                                                                                                          |                                                                                                                                                                                                                                                                                                                                                                                                   |   |            |         |            |            |              |    |                   |          |   |            |    |    |             |              |    |             |                   |
| 0   | No                                                                            |                                                                                                                                          |                                                                                                                                                                                                                                                                                                                                                                                                   |   |            |         |            |            |              |    |                   |          |   |            |    |    |             |              |    |             |                   |
| 99  | Doesn't know                                                                  |                                                                                                                                          |                                                                                                                                                                                                                                                                                                                                                                                                   |   |            |         |            |            |              |    |                   |          |   |            |    |    |             |              |    |             |                   |
| 88  | Refused to answer                                                             |                                                                                                                                          |                                                                                                                                                                                                                                                                                                                                                                                                   |   |            |         |            |            |              |    |                   |          |   |            |    |    |             |              |    |             |                   |
| 662 | [id10182]<br>Show the field ONLY if:<br>[id10181]='1' and [ageindays]<br>>=28 | How long did the baby have frequent loose or liquid stools? (in days)                                                                    | text (number)                                                                                                                                                                                                                                                                                                                                                                                     |   |            |         |            |            |              |    |                   |          |   |            |    |    |             |              |    |             |                   |
| 663 | [id10183]<br>Show the field ONLY if:<br>[id10181]='1' and [ageindays]<br><28  | How many stools did the baby have on the day that loose liquid stools were most frequent?                                                | text (number)                                                                                                                                                                                                                                                                                                                                                                                     |   |            |         |            |            |              |    |                   |          |   |            |    |    |             |              |    |             |                   |
| 664 | [id10184]<br>Show the field ONLY if:<br>[id10181]='1' and [ageindays]<br><28  | How many days before death did the frequent loose or liquid stools start?                                                                | text (number)                                                                                                                                                                                                                                                                                                                                                                                     |   |            |         |            |            |              |    |                   |          |   |            |    |    |             |              |    |             |                   |

|     |                                                                                            |                                                                                                                                                                                                           |                                                                   |
|-----|--------------------------------------------------------------------------------------------|-----------------------------------------------------------------------------------------------------------------------------------------------------------------------------------------------------------|-------------------------------------------------------------------|
| 665 | [id10185]<br>Show the field ONLY if:<br>[id10181]='1' and [ageindays]<br>>=28              | Did the frequent loose or liquid stools continue until death?                                                                                                                                             | radio<br>1 Yes<br>0 No<br>99 Doesn't know<br>88 Refused to answer |
| 666 | [id10186]                                                                                  | At any time during the final illness was there blood in the stools?                                                                                                                                       | radio<br>1 Yes<br>0 No<br>99 Doesn't know<br>88 Refused to answer |
| 667 | [id10187]<br>Show the field ONLY if:<br>[id10186]='1' and [ageindays]<br>>=28              | Was there blood in the stool up until death?                                                                                                                                                              | radio<br>1 Yes<br>0 No<br>99 Doesn't know<br>88 Refused to answer |
| 668 | [id10188]                                                                                  | Did the baby vomit?                                                                                                                                                                                       | radio<br>1 Yes<br>0 No<br>99 Doesn't know<br>88 Refused to answer |
| 669 | [id10194]                                                                                  | To clarify: Did the baby vomit in the week preceding the death?                                                                                                                                           | radio<br>1 Yes<br>0 No<br>99 Doesn't know<br>88 Refused to answer |
| 670 | [id10190]<br>Show the field ONLY if:<br>[id10188]='1' or [id10188]='2'<br>or [id10188]='3' | How long before death did the baby vomit? (days)                                                                                                                                                          | text (number)                                                     |
| 671 | [id10188_projectile]<br>Show the field ONLY if:<br>[id10188]='1'                           | Did the baby projectile vomit?<br><i>Explain to the respondent that projectile vomiting is when spit-up or vomit forcefully flies out of a baby's mouth. This is different from simple regurgitation.</i> | radio<br>1 Yes<br>0 No<br>99 Doesn't know<br>88 Refused to answer |
| 672 | [id10191]<br>Show the field ONLY if:<br>[id10188]='1'                                      | Was there blood in the vomit?                                                                                                                                                                             | radio<br>1 Yes<br>0 No<br>99 Doesn't know<br>88 Refused to answer |
| 673 | [id10188_billious]<br>Show the field ONLY if:<br>[id10188]='1'                             | Was the vomit green?<br><i>Either light or dark green.</i>                                                                                                                                                | radio<br>1 Yes<br>0 No<br>99 Doesn't know<br>88 Refused to answer |
| 674 | [id10192]<br>Show the field ONLY if:<br>[id10188]='1' and [ageindays]<br>>=28              | Was the vomit black?                                                                                                                                                                                      | radio<br>1 Yes<br>0 No<br>99 Doesn't know<br>88 Refused to answer |

|     |                                                                                                                                           |                                                                                                                                                 |                                                                                                                                                                                                      |   |         |   |        |    |              |    |                   |
|-----|-------------------------------------------------------------------------------------------------------------------------------------------|-------------------------------------------------------------------------------------------------------------------------------------------------|------------------------------------------------------------------------------------------------------------------------------------------------------------------------------------------------------|---|---------|---|--------|----|--------------|----|-------------------|
| 675 | [id10193]<br>Show the field ONLY if:<br>[ageindays]>=28                                                                                   | Did the baby have any belly (abdominal) problem?<br><i>Explain to the respondent that problems could be pain, protruding abdomen or a mass.</i> | radio<br><table border="1"> <tr><td>1</td><td>Yes</td></tr> <tr><td>0</td><td>No</td></tr> <tr><td>99</td><td>Doesn't know</td></tr> <tr><td>88</td><td>Refused to answer</td></tr> </table>         | 1 | Yes     | 0 | No     | 99 | Doesn't know | 88 | Refused to answer |
| 1   | Yes                                                                                                                                       |                                                                                                                                                 |                                                                                                                                                                                                      |   |         |   |        |    |              |    |                   |
| 0   | No                                                                                                                                        |                                                                                                                                                 |                                                                                                                                                                                                      |   |         |   |        |    |              |    |                   |
| 99  | Doesn't know                                                                                                                              |                                                                                                                                                 |                                                                                                                                                                                                      |   |         |   |        |    |              |    |                   |
| 88  | Refused to answer                                                                                                                         |                                                                                                                                                 |                                                                                                                                                                                                      |   |         |   |        |    |              |    |                   |
| 676 | [id10200]<br>Show the field ONLY if:<br>[id10193]='1' and [ageindays]<br>>=28                                                             | Did the baby have a more than usually protruding belly (abdomen)?                                                                               | radio<br><table border="1"> <tr><td>1</td><td>Yes</td></tr> <tr><td>0</td><td>No</td></tr> <tr><td>99</td><td>Doesn't know</td></tr> <tr><td>88</td><td>Refused to answer</td></tr> </table>         | 1 | Yes     | 0 | No     | 99 | Doesn't know | 88 | Refused to answer |
| 1   | Yes                                                                                                                                       |                                                                                                                                                 |                                                                                                                                                                                                      |   |         |   |        |    |              |    |                   |
| 0   | No                                                                                                                                        |                                                                                                                                                 |                                                                                                                                                                                                      |   |         |   |        |    |              |    |                   |
| 99  | Doesn't know                                                                                                                              |                                                                                                                                                 |                                                                                                                                                                                                      |   |         |   |        |    |              |    |                   |
| 88  | Refused to answer                                                                                                                         |                                                                                                                                                 |                                                                                                                                                                                                      |   |         |   |        |    |              |    |                   |
| 677 | [id10201]<br>Show the field ONLY if:<br>[id10200]='1'                                                                                     | For how long before death did the baby have a more than usually protruding belly (abdomen)? (in days)                                           | text (number)                                                                                                                                                                                        |   |         |   |        |    |              |    |                   |
| 678 | [id10203]<br>Show the field ONLY if:<br>[id10200]='1'                                                                                     | How rapidly did the baby develop the protruding belly (abdomen)?                                                                                | radio<br><table border="1"> <tr><td>1</td><td>Rapidly</td></tr> <tr><td>2</td><td>Slowly</td></tr> <tr><td>99</td><td>Doesn't know</td></tr> <tr><td>88</td><td>Refused to answer</td></tr> </table> | 1 | Rapidly | 2 | Slowly | 99 | Doesn't know | 88 | Refused to answer |
| 1   | Rapidly                                                                                                                                   |                                                                                                                                                 |                                                                                                                                                                                                      |   |         |   |        |    |              |    |                   |
| 2   | Slowly                                                                                                                                    |                                                                                                                                                 |                                                                                                                                                                                                      |   |         |   |        |    |              |    |                   |
| 99  | Doesn't know                                                                                                                              |                                                                                                                                                 |                                                                                                                                                                                                      |   |         |   |        |    |              |    |                   |
| 88  | Refused to answer                                                                                                                         |                                                                                                                                                 |                                                                                                                                                                                                      |   |         |   |        |    |              |    |                   |
| 679 | [id10204]<br>Show the field ONLY if:<br>[ageindays]>=28                                                                                   | Did the baby have any mass in the belly (abdomen)?                                                                                              | radio<br><table border="1"> <tr><td>1</td><td>Yes</td></tr> <tr><td>0</td><td>No</td></tr> <tr><td>99</td><td>Doesn't know</td></tr> <tr><td>88</td><td>Refused to answer</td></tr> </table>         | 1 | Yes     | 0 | No     | 99 | Doesn't know | 88 | Refused to answer |
| 1   | Yes                                                                                                                                       |                                                                                                                                                 |                                                                                                                                                                                                      |   |         |   |        |    |              |    |                   |
| 0   | No                                                                                                                                        |                                                                                                                                                 |                                                                                                                                                                                                      |   |         |   |        |    |              |    |                   |
| 99  | Doesn't know                                                                                                                              |                                                                                                                                                 |                                                                                                                                                                                                      |   |         |   |        |    |              |    |                   |
| 88  | Refused to answer                                                                                                                         |                                                                                                                                                 |                                                                                                                                                                                                      |   |         |   |        |    |              |    |                   |
| 680 | [id10205]<br>Show the field ONLY if:<br>[id10204]='1'                                                                                     | For how long did the baby have a mass in the belly (abdomen)? (in days)                                                                         | text (number)                                                                                                                                                                                        |   |         |   |        |    |              |    |                   |
| 681 | [id10214]                                                                                                                                 | Was the baby unconscious during the illness that led to death?                                                                                  | radio<br><table border="1"> <tr><td>1</td><td>Yes</td></tr> <tr><td>0</td><td>No</td></tr> <tr><td>99</td><td>Doesn't know</td></tr> <tr><td>88</td><td>Refused to answer</td></tr> </table>         | 1 | Yes     | 0 | No     | 99 | Doesn't know | 88 | Refused to answer |
| 1   | Yes                                                                                                                                       |                                                                                                                                                 |                                                                                                                                                                                                      |   |         |   |        |    |              |    |                   |
| 0   | No                                                                                                                                        |                                                                                                                                                 |                                                                                                                                                                                                      |   |         |   |        |    |              |    |                   |
| 99  | Doesn't know                                                                                                                              |                                                                                                                                                 |                                                                                                                                                                                                      |   |         |   |        |    |              |    |                   |
| 88  | Refused to answer                                                                                                                         |                                                                                                                                                 |                                                                                                                                                                                                      |   |         |   |        |    |              |    |                   |
| 682 | [id10215]<br>Show the field ONLY if:<br>[id10214]='1'                                                                                     | Was the baby unconscious for more than 24 hours before death?                                                                                   | radio<br><table border="1"> <tr><td>1</td><td>Yes</td></tr> <tr><td>0</td><td>No</td></tr> <tr><td>99</td><td>Doesn't know</td></tr> <tr><td>88</td><td>Refused to answer</td></tr> </table>         | 1 | Yes     | 0 | No     | 99 | Doesn't know | 88 | Refused to answer |
| 1   | Yes                                                                                                                                       |                                                                                                                                                 |                                                                                                                                                                                                      |   |         |   |        |    |              |    |                   |
| 0   | No                                                                                                                                        |                                                                                                                                                 |                                                                                                                                                                                                      |   |         |   |        |    |              |    |                   |
| 99  | Doesn't know                                                                                                                              |                                                                                                                                                 |                                                                                                                                                                                                      |   |         |   |        |    |              |    |                   |
| 88  | Refused to answer                                                                                                                         |                                                                                                                                                 |                                                                                                                                                                                                      |   |         |   |        |    |              |    |                   |
| 683 | [id10216]<br>Show the field ONLY if:<br>[ageindays]>=28 and [id10214] = '1' and ([id10215] = '0' or [id10215] = '99' or [id10215] = '88') | How many hours before death did the unconsciousness start?                                                                                      | text (number)                                                                                                                                                                                        |   |         |   |        |    |              |    |                   |
| 684 | [id10217]<br>Show the field ONLY if:<br>[id10214]='1' and [ageindays]<br>>=28                                                             | Did the unconsciousness start suddenly, quickly (at least within a single day)?                                                                 | radio<br><table border="1"> <tr><td>1</td><td>Yes</td></tr> <tr><td>0</td><td>No</td></tr> <tr><td>99</td><td>Doesn't know</td></tr> <tr><td>88</td><td>Refused to answer</td></tr> </table>         | 1 | Yes     | 0 | No     | 99 | Doesn't know | 88 | Refused to answer |
| 1   | Yes                                                                                                                                       |                                                                                                                                                 |                                                                                                                                                                                                      |   |         |   |        |    |              |    |                   |
| 0   | No                                                                                                                                        |                                                                                                                                                 |                                                                                                                                                                                                      |   |         |   |        |    |              |    |                   |
| 99  | Doesn't know                                                                                                                              |                                                                                                                                                 |                                                                                                                                                                                                      |   |         |   |        |    |              |    |                   |
| 88  | Refused to answer                                                                                                                         |                                                                                                                                                 |                                                                                                                                                                                                      |   |         |   |        |    |              |    |                   |



|     |                                                                               |                                                                                                                                                                                                                                    |                                                                                                                                                                                              |   |     |   |    |    |              |    |                   |
|-----|-------------------------------------------------------------------------------|------------------------------------------------------------------------------------------------------------------------------------------------------------------------------------------------------------------------------------|----------------------------------------------------------------------------------------------------------------------------------------------------------------------------------------------|---|-----|---|----|----|--------------|----|-------------------|
| 685 | [id10218]<br>Show the field ONLY if:<br>[id10214]='1' and [ageindays]<br>>=28 | Did the unconsciousness continue until death?                                                                                                                                                                                      | radio<br><table border="1"> <tr><td>1</td><td>Yes</td></tr> <tr><td>0</td><td>No</td></tr> <tr><td>99</td><td>Doesn't know</td></tr> <tr><td>88</td><td>Refused to answer</td></tr> </table> | 1 | Yes | 0 | No | 99 | Doesn't know | 88 | Refused to answer |
| 1   | Yes                                                                           |                                                                                                                                                                                                                                    |                                                                                                                                                                                              |   |     |   |    |    |              |    |                   |
| 0   | No                                                                            |                                                                                                                                                                                                                                    |                                                                                                                                                                                              |   |     |   |    |    |              |    |                   |
| 99  | Doesn't know                                                                  |                                                                                                                                                                                                                                    |                                                                                                                                                                                              |   |     |   |    |    |              |    |                   |
| 88  | Refused to answer                                                             |                                                                                                                                                                                                                                    |                                                                                                                                                                                              |   |     |   |    |    |              |    |                   |
| 686 | [id10219]                                                                     | Did the baby have convulsions?                                                                                                                                                                                                     | radio<br><table border="1"> <tr><td>1</td><td>Yes</td></tr> <tr><td>0</td><td>No</td></tr> <tr><td>99</td><td>Doesn't know</td></tr> <tr><td>88</td><td>Refused to answer</td></tr> </table> | 1 | Yes | 0 | No | 99 | Doesn't know | 88 | Refused to answer |
| 1   | Yes                                                                           |                                                                                                                                                                                                                                    |                                                                                                                                                                                              |   |     |   |    |    |              |    |                   |
| 0   | No                                                                            |                                                                                                                                                                                                                                    |                                                                                                                                                                                              |   |     |   |    |    |              |    |                   |
| 99  | Doesn't know                                                                  |                                                                                                                                                                                                                                    |                                                                                                                                                                                              |   |     |   |    |    |              |    |                   |
| 88  | Refused to answer                                                             |                                                                                                                                                                                                                                    |                                                                                                                                                                                              |   |     |   |    |    |              |    |                   |
| 687 | [id10220]<br>Show the field ONLY if:<br>[id10219]='1' and [ageindays]<br>>=28 | Did the baby experience any generalized convulsions or fits during the illness that led to death?                                                                                                                                  | radio<br><table border="1"> <tr><td>1</td><td>Yes</td></tr> <tr><td>0</td><td>No</td></tr> <tr><td>99</td><td>Doesn't know</td></tr> <tr><td>88</td><td>Refused to answer</td></tr> </table> | 1 | Yes | 0 | No | 99 | Doesn't know | 88 | Refused to answer |
| 1   | Yes                                                                           |                                                                                                                                                                                                                                    |                                                                                                                                                                                              |   |     |   |    |    |              |    |                   |
| 0   | No                                                                            |                                                                                                                                                                                                                                    |                                                                                                                                                                                              |   |     |   |    |    |              |    |                   |
| 99  | Doesn't know                                                                  |                                                                                                                                                                                                                                    |                                                                                                                                                                                              |   |     |   |    |    |              |    |                   |
| 88  | Refused to answer                                                             |                                                                                                                                                                                                                                    |                                                                                                                                                                                              |   |     |   |    |    |              |    |                   |
| 688 | [id10221]<br>Show the field ONLY if:<br>[id10219]='1' and [ageindays]<br>>=28 | For how many minutes did the convulsions last?<br><i>The answer could be given in another unit, but for data entry use minutes. Less than 1 minute=0; 1 hour=60 minutes. Enter "99" for "don't know." Enter "88" for "refuse."</i> | text                                                                                                                                                                                         |   |     |   |    |    |              |    |                   |
| 689 | [id10222]<br>Show the field ONLY if:<br>[id10219]='1' and [ageindays]<br>>=28 | Did the baby become unconscious immediately after the convulsion?                                                                                                                                                                  | radio<br><table border="1"> <tr><td>1</td><td>Yes</td></tr> <tr><td>0</td><td>No</td></tr> <tr><td>99</td><td>Doesn't know</td></tr> <tr><td>88</td><td>Refused to answer</td></tr> </table> | 1 | Yes | 0 | No | 99 | Doesn't know | 88 | Refused to answer |
| 1   | Yes                                                                           |                                                                                                                                                                                                                                    |                                                                                                                                                                                              |   |     |   |    |    |              |    |                   |
| 0   | No                                                                            |                                                                                                                                                                                                                                    |                                                                                                                                                                                              |   |     |   |    |    |              |    |                   |
| 99  | Doesn't know                                                                  |                                                                                                                                                                                                                                    |                                                                                                                                                                                              |   |     |   |    |    |              |    |                   |
| 88  | Refused to answer                                                             |                                                                                                                                                                                                                                    |                                                                                                                                                                                              |   |     |   |    |    |              |    |                   |
| 690 | [id10223]<br>Show the field ONLY if:<br>[ageindays]>=28                       | Did the baby have any urine problems?<br><i>Explain to the respondent that urine problems refer to urinating a lot or not at all, and blood in the urine.</i>                                                                      | radio<br><table border="1"> <tr><td>1</td><td>Yes</td></tr> <tr><td>0</td><td>No</td></tr> <tr><td>99</td><td>Doesn't know</td></tr> <tr><td>88</td><td>Refused to answer</td></tr> </table> | 1 | Yes | 0 | No | 99 | Doesn't know | 88 | Refused to answer |
| 1   | Yes                                                                           |                                                                                                                                                                                                                                    |                                                                                                                                                                                              |   |     |   |    |    |              |    |                   |
| 0   | No                                                                            |                                                                                                                                                                                                                                    |                                                                                                                                                                                              |   |     |   |    |    |              |    |                   |
| 99  | Doesn't know                                                                  |                                                                                                                                                                                                                                    |                                                                                                                                                                                              |   |     |   |    |    |              |    |                   |
| 88  | Refused to answer                                                             |                                                                                                                                                                                                                                    |                                                                                                                                                                                              |   |     |   |    |    |              |    |                   |
| 691 | [id10225]<br>Show the field ONLY if:<br>[id10223]='1' and [ageindays]<br>>=28 | Did the baby urinate more often than usual?                                                                                                                                                                                        | radio<br><table border="1"> <tr><td>1</td><td>Yes</td></tr> <tr><td>0</td><td>No</td></tr> <tr><td>99</td><td>Doesn't know</td></tr> <tr><td>88</td><td>Refused to answer</td></tr> </table> | 1 | Yes | 0 | No | 99 | Doesn't know | 88 | Refused to answer |
| 1   | Yes                                                                           |                                                                                                                                                                                                                                    |                                                                                                                                                                                              |   |     |   |    |    |              |    |                   |
| 0   | No                                                                            |                                                                                                                                                                                                                                    |                                                                                                                                                                                              |   |     |   |    |    |              |    |                   |
| 99  | Doesn't know                                                                  |                                                                                                                                                                                                                                    |                                                                                                                                                                                              |   |     |   |    |    |              |    |                   |
| 88  | Refused to answer                                                             |                                                                                                                                                                                                                                    |                                                                                                                                                                                              |   |     |   |    |    |              |    |                   |
| 692 | [id10226]<br>Show the field ONLY if:<br>[id10223]='1' and [ageindays]<br>>=28 | During the final illness did the baby ever pass blood in the urine?                                                                                                                                                                | radio<br><table border="1"> <tr><td>1</td><td>Yes</td></tr> <tr><td>0</td><td>No</td></tr> <tr><td>99</td><td>Doesn't know</td></tr> <tr><td>88</td><td>Refused to answer</td></tr> </table> | 1 | Yes | 0 | No | 99 | Doesn't know | 88 | Refused to answer |
| 1   | Yes                                                                           |                                                                                                                                                                                                                                    |                                                                                                                                                                                              |   |     |   |    |    |              |    |                   |
| 0   | No                                                                            |                                                                                                                                                                                                                                    |                                                                                                                                                                                              |   |     |   |    |    |              |    |                   |
| 99  | Doesn't know                                                                  |                                                                                                                                                                                                                                    |                                                                                                                                                                                              |   |     |   |    |    |              |    |                   |
| 88  | Refused to answer                                                             |                                                                                                                                                                                                                                    |                                                                                                                                                                                              |   |     |   |    |    |              |    |                   |
| 693 | [id10224]<br>Show the field ONLY if:<br>[id10223]='1' and [ageindays]<br>>=28 | Did the baby stop urinating?<br><i>This means that the deceased stopped urinating.</i>                                                                                                                                             | radio<br><table border="1"> <tr><td>1</td><td>Yes</td></tr> <tr><td>0</td><td>No</td></tr> <tr><td>99</td><td>Doesn't know</td></tr> <tr><td>88</td><td>Refused to answer</td></tr> </table> | 1 | Yes | 0 | No | 99 | Doesn't know | 88 | Refused to answer |
| 1   | Yes                                                                           |                                                                                                                                                                                                                                    |                                                                                                                                                                                              |   |     |   |    |    |              |    |                   |
| 0   | No                                                                            |                                                                                                                                                                                                                                    |                                                                                                                                                                                              |   |     |   |    |    |              |    |                   |
| 99  | Doesn't know                                                                  |                                                                                                                                                                                                                                    |                                                                                                                                                                                              |   |     |   |    |    |              |    |                   |
| 88  | Refused to answer                                                             |                                                                                                                                                                                                                                    |                                                                                                                                                                                              |   |     |   |    |    |              |    |                   |
| 694 | [id10227]<br>Show the field ONLY if:<br>[ageindays]>=28                       | Did the baby have sores or ulcers anywhere on the body?                                                                                                                                                                            | radio<br><table border="1"> <tr><td>1</td><td>Yes</td></tr> <tr><td>0</td><td>No</td></tr> <tr><td>99</td><td>Doesn't know</td></tr> <tr><td>88</td><td>Refused to answer</td></tr> </table> | 1 | Yes | 0 | No | 99 | Doesn't know | 88 | Refused to answer |
| 1   | Yes                                                                           |                                                                                                                                                                                                                                    |                                                                                                                                                                                              |   |     |   |    |    |              |    |                   |
| 0   | No                                                                            |                                                                                                                                                                                                                                    |                                                                                                                                                                                              |   |     |   |    |    |              |    |                   |
| 99  | Doesn't know                                                                  |                                                                                                                                                                                                                                    |                                                                                                                                                                                              |   |     |   |    |    |              |    |                   |
| 88  | Refused to answer                                                             |                                                                                                                                                                                                                                    |                                                                                                                                                                                              |   |     |   |    |    |              |    |                   |

|     |                                                                               |                                                                                                                                                                                                                                                                          |                                                                                                                                                                                                                                                                                  |   |            |      |    |            |                  |    |                   |             |   |            |            |
|-----|-------------------------------------------------------------------------------|--------------------------------------------------------------------------------------------------------------------------------------------------------------------------------------------------------------------------------------------------------------------------|----------------------------------------------------------------------------------------------------------------------------------------------------------------------------------------------------------------------------------------------------------------------------------|---|------------|------|----|------------|------------------|----|-------------------|-------------|---|------------|------------|
| 695 | [id10229]<br>Show the field ONLY if:<br>[id10227]='1' and [ageindays]<br>>=28 | Did the sores have clear fluid or pus?                                                                                                                                                                                                                                   | radio<br><table border="1"> <tr><td>1</td><td>Yes</td></tr> <tr><td>0</td><td>No</td></tr> <tr><td>99</td><td>Doesn't know</td></tr> <tr><td>88</td><td>Refused to answer</td></tr> </table>                                                                                     | 1 | Yes        | 0    | No | 99         | Doesn't know     | 88 | Refused to answer |             |   |            |            |
| 1   | Yes                                                                           |                                                                                                                                                                                                                                                                          |                                                                                                                                                                                                                                                                                  |   |            |      |    |            |                  |    |                   |             |   |            |            |
| 0   | No                                                                            |                                                                                                                                                                                                                                                                          |                                                                                                                                                                                                                                                                                  |   |            |      |    |            |                  |    |                   |             |   |            |            |
| 99  | Doesn't know                                                                  |                                                                                                                                                                                                                                                                          |                                                                                                                                                                                                                                                                                  |   |            |      |    |            |                  |    |                   |             |   |            |            |
| 88  | Refused to answer                                                             |                                                                                                                                                                                                                                                                          |                                                                                                                                                                                                                                                                                  |   |            |      |    |            |                  |    |                   |             |   |            |            |
| 696 | [id10230]<br>Show the field ONLY if:<br>[ageindays]>=28                       | Did the baby have an ulcer (pit) on the foot?                                                                                                                                                                                                                            | radio<br><table border="1"> <tr><td>1</td><td>Yes</td></tr> <tr><td>0</td><td>No</td></tr> <tr><td>99</td><td>Doesn't know</td></tr> <tr><td>88</td><td>Refused to answer</td></tr> </table>                                                                                     | 1 | Yes        | 0    | No | 99         | Doesn't know     | 88 | Refused to answer |             |   |            |            |
| 1   | Yes                                                                           |                                                                                                                                                                                                                                                                          |                                                                                                                                                                                                                                                                                  |   |            |      |    |            |                  |    |                   |             |   |            |            |
| 0   | No                                                                            |                                                                                                                                                                                                                                                                          |                                                                                                                                                                                                                                                                                  |   |            |      |    |            |                  |    |                   |             |   |            |            |
| 99  | Doesn't know                                                                  |                                                                                                                                                                                                                                                                          |                                                                                                                                                                                                                                                                                  |   |            |      |    |            |                  |    |                   |             |   |            |            |
| 88  | Refused to answer                                                             |                                                                                                                                                                                                                                                                          |                                                                                                                                                                                                                                                                                  |   |            |      |    |            |                  |    |                   |             |   |            |            |
| 697 | [id10231]<br>Show the field ONLY if:<br>[id10230]='1' and [ageindays]<br>>=28 | Did the ulcer on the foot ooze pus?                                                                                                                                                                                                                                      | radio<br><table border="1"> <tr><td>1</td><td>Yes</td></tr> <tr><td>0</td><td>No</td></tr> <tr><td>99</td><td>Doesn't know</td></tr> <tr><td>88</td><td>Refused to answer</td></tr> </table>                                                                                     | 1 | Yes        | 0    | No | 99         | Doesn't know     | 88 | Refused to answer |             |   |            |            |
| 1   | Yes                                                                           |                                                                                                                                                                                                                                                                          |                                                                                                                                                                                                                                                                                  |   |            |      |    |            |                  |    |                   |             |   |            |            |
| 0   | No                                                                            |                                                                                                                                                                                                                                                                          |                                                                                                                                                                                                                                                                                  |   |            |      |    |            |                  |    |                   |             |   |            |            |
| 99  | Doesn't know                                                                  |                                                                                                                                                                                                                                                                          |                                                                                                                                                                                                                                                                                  |   |            |      |    |            |                  |    |                   |             |   |            |            |
| 88  | Refused to answer                                                             |                                                                                                                                                                                                                                                                          |                                                                                                                                                                                                                                                                                  |   |            |      |    |            |                  |    |                   |             |   |            |            |
| 698 | [id10232]<br>Show the field ONLY if:<br>[id10231]='1' and [ageindays]<br>>=28 | For how many days did the ulcer on the foot ooze pus?                                                                                                                                                                                                                    | text                                                                                                                                                                                                                                                                             |   |            |      |    |            |                  |    |                   |             |   |            |            |
| 699 | [id10233]                                                                     | During the illness that led to death, did the baby have any skin rash?                                                                                                                                                                                                   | radio<br><table border="1"> <tr><td>1</td><td>Yes</td></tr> <tr><td>0</td><td>No</td></tr> <tr><td>99</td><td>Doesn't know</td></tr> <tr><td>88</td><td>Refused to answer</td></tr> </table>                                                                                     | 1 | Yes        | 0    | No | 99         | Doesn't know     | 88 | Refused to answer |             |   |            |            |
| 1   | Yes                                                                           |                                                                                                                                                                                                                                                                          |                                                                                                                                                                                                                                                                                  |   |            |      |    |            |                  |    |                   |             |   |            |            |
| 0   | No                                                                            |                                                                                                                                                                                                                                                                          |                                                                                                                                                                                                                                                                                  |   |            |      |    |            |                  |    |                   |             |   |            |            |
| 99  | Doesn't know                                                                  |                                                                                                                                                                                                                                                                          |                                                                                                                                                                                                                                                                                  |   |            |      |    |            |                  |    |                   |             |   |            |            |
| 88  | Refused to answer                                                             |                                                                                                                                                                                                                                                                          |                                                                                                                                                                                                                                                                                  |   |            |      |    |            |                  |    |                   |             |   |            |            |
| 700 | [id10234]<br>Show the field ONLY if:<br>[id10233]='1' and [ageindays]<br>>=28 | For how many days did the baby have the skin rash?<br><i>The answer could be given in another unit, but for data entry use days.<br/>Less than 1 day or 24 hours = 0 days; 1 week=7 days; 1 month=30 days.<br/>Enter "99" for "don't know." Enter "88" for "refuse."</i> | text                                                                                                                                                                                                                                                                             |   |            |      |    |            |                  |    |                   |             |   |            |            |
| 701 | [id10235]<br>Show the field ONLY if:<br>[id10233]='1' and [ageindays]<br>>=28 | Where was the rash?                                                                                                                                                                                                                                                      | checkbox<br><table border="1"> <tr><td>1</td><td>id10235__1</td><td>Face</td></tr> <tr><td>2</td><td>id10235__2</td><td>Trunk or abdomen</td></tr> <tr><td>3</td><td>id10235__3</td><td>Extremities</td></tr> <tr><td>4</td><td>id10235__4</td><td>Everywhere</td></tr> </table> | 1 | id10235__1 | Face | 2  | id10235__2 | Trunk or abdomen | 3  | id10235__3        | Extremities | 4 | id10235__4 | Everywhere |
| 1   | id10235__1                                                                    | Face                                                                                                                                                                                                                                                                     |                                                                                                                                                                                                                                                                                  |   |            |      |    |            |                  |    |                   |             |   |            |            |
| 2   | id10235__2                                                                    | Trunk or abdomen                                                                                                                                                                                                                                                         |                                                                                                                                                                                                                                                                                  |   |            |      |    |            |                  |    |                   |             |   |            |            |
| 3   | id10235__3                                                                    | Extremities                                                                                                                                                                                                                                                              |                                                                                                                                                                                                                                                                                  |   |            |      |    |            |                  |    |                   |             |   |            |            |
| 4   | id10235__4                                                                    | Everywhere                                                                                                                                                                                                                                                               |                                                                                                                                                                                                                                                                                  |   |            |      |    |            |                  |    |                   |             |   |            |            |
| 702 | [id10236]<br>Show the field ONLY if:<br>[id10233]='1' and [ageindays]<br>>=28 | Did the baby have measles rash (use local term)?                                                                                                                                                                                                                         | radio<br><table border="1"> <tr><td>1</td><td>Yes</td></tr> <tr><td>0</td><td>No</td></tr> <tr><td>99</td><td>Doesn't know</td></tr> <tr><td>88</td><td>Refused to answer</td></tr> </table>                                                                                     | 1 | Yes        | 0    | No | 99         | Doesn't know     | 88 | Refused to answer |             |   |            |            |
| 1   | Yes                                                                           |                                                                                                                                                                                                                                                                          |                                                                                                                                                                                                                                                                                  |   |            |      |    |            |                  |    |                   |             |   |            |            |
| 0   | No                                                                            |                                                                                                                                                                                                                                                                          |                                                                                                                                                                                                                                                                                  |   |            |      |    |            |                  |    |                   |             |   |            |            |
| 99  | Doesn't know                                                                  |                                                                                                                                                                                                                                                                          |                                                                                                                                                                                                                                                                                  |   |            |      |    |            |                  |    |                   |             |   |            |            |
| 88  | Refused to answer                                                             |                                                                                                                                                                                                                                                                          |                                                                                                                                                                                                                                                                                  |   |            |      |    |            |                  |    |                   |             |   |            |            |
| 703 | [id10238]<br>Show the field ONLY if:<br>[ageindays]>=28                       | During the illness that led to death, did their skin flake off in patches?                                                                                                                                                                                               | radio<br><table border="1"> <tr><td>1</td><td>Yes</td></tr> <tr><td>0</td><td>No</td></tr> <tr><td>99</td><td>Doesn't know</td></tr> <tr><td>88</td><td>Refused to answer</td></tr> </table>                                                                                     | 1 | Yes        | 0    | No | 99         | Doesn't know     | 88 | Refused to answer |             |   |            |            |
| 1   | Yes                                                                           |                                                                                                                                                                                                                                                                          |                                                                                                                                                                                                                                                                                  |   |            |      |    |            |                  |    |                   |             |   |            |            |
| 0   | No                                                                            |                                                                                                                                                                                                                                                                          |                                                                                                                                                                                                                                                                                  |   |            |      |    |            |                  |    |                   |             |   |            |            |
| 99  | Doesn't know                                                                  |                                                                                                                                                                                                                                                                          |                                                                                                                                                                                                                                                                                  |   |            |      |    |            |                  |    |                   |             |   |            |            |
| 88  | Refused to answer                                                             |                                                                                                                                                                                                                                                                          |                                                                                                                                                                                                                                                                                  |   |            |      |    |            |                  |    |                   |             |   |            |            |
| 704 | [id10239]                                                                     | During the illness that led to death, did the baby have areas of the skin that turned black?                                                                                                                                                                             | radio<br><table border="1"> <tr><td>1</td><td>Yes</td></tr> <tr><td>0</td><td>No</td></tr> <tr><td>99</td><td>Doesn't know</td></tr> <tr><td>88</td><td>Refused to answer</td></tr> </table>                                                                                     | 1 | Yes        | 0    | No | 99         | Doesn't know     | 88 | Refused to answer |             |   |            |            |
| 1   | Yes                                                                           |                                                                                                                                                                                                                                                                          |                                                                                                                                                                                                                                                                                  |   |            |      |    |            |                  |    |                   |             |   |            |            |
| 0   | No                                                                            |                                                                                                                                                                                                                                                                          |                                                                                                                                                                                                                                                                                  |   |            |      |    |            |                  |    |                   |             |   |            |            |
| 99  | Doesn't know                                                                  |                                                                                                                                                                                                                                                                          |                                                                                                                                                                                                                                                                                  |   |            |      |    |            |                  |    |                   |             |   |            |            |
| 88  | Refused to answer                                                             |                                                                                                                                                                                                                                                                          |                                                                                                                                                                                                                                                                                  |   |            |      |    |            |                  |    |                   |             |   |            |            |

|     |                                                      |                                                                                                           |                                                                                                                                                                                              |   |     |   |    |    |              |    |                   |
|-----|------------------------------------------------------|-----------------------------------------------------------------------------------------------------------|----------------------------------------------------------------------------------------------------------------------------------------------------------------------------------------------|---|-----|---|----|----|--------------|----|-------------------|
| 705 | [id10240]                                            | During the illness that led to death, did the baby have areas of the skin with redness and swelling?      | radio<br><table border="1"> <tr><td>1</td><td>Yes</td></tr> <tr><td>0</td><td>No</td></tr> <tr><td>99</td><td>Doesn't know</td></tr> <tr><td>88</td><td>Refused to answer</td></tr> </table> | 1 | Yes | 0 | No | 99 | Doesn't know | 88 | Refused to answer |
| 1   | Yes                                                  |                                                                                                           |                                                                                                                                                                                              |   |     |   |    |    |              |    |                   |
| 0   | No                                                   |                                                                                                           |                                                                                                                                                                                              |   |     |   |    |    |              |    |                   |
| 99  | Doesn't know                                         |                                                                                                           |                                                                                                                                                                                              |   |     |   |    |    |              |    |                   |
| 88  | Refused to answer                                    |                                                                                                           |                                                                                                                                                                                              |   |     |   |    |    |              |    |                   |
| 706 | [id10241]                                            | During the illness that led to death, did the baby bleed from anywhere?                                   | radio<br><table border="1"> <tr><td>1</td><td>Yes</td></tr> <tr><td>0</td><td>No</td></tr> <tr><td>99</td><td>Doesn't know</td></tr> <tr><td>88</td><td>Refused to answer</td></tr> </table> | 1 | Yes | 0 | No | 99 | Doesn't know | 88 | Refused to answer |
| 1   | Yes                                                  |                                                                                                           |                                                                                                                                                                                              |   |     |   |    |    |              |    |                   |
| 0   | No                                                   |                                                                                                           |                                                                                                                                                                                              |   |     |   |    |    |              |    |                   |
| 99  | Doesn't know                                         |                                                                                                           |                                                                                                                                                                                              |   |     |   |    |    |              |    |                   |
| 88  | Refused to answer                                    |                                                                                                           |                                                                                                                                                                                              |   |     |   |    |    |              |    |                   |
| 707 | [id10242]<br>Show the field ONLY if: [id10241]='1'   | Did the baby bleed from the nose, mouth or anus (bum)?                                                    | radio<br><table border="1"> <tr><td>1</td><td>Yes</td></tr> <tr><td>0</td><td>No</td></tr> <tr><td>99</td><td>Doesn't know</td></tr> <tr><td>88</td><td>Refused to answer</td></tr> </table> | 1 | Yes | 0 | No | 99 | Doesn't know | 88 | Refused to answer |
| 1   | Yes                                                  |                                                                                                           |                                                                                                                                                                                              |   |     |   |    |    |              |    |                   |
| 0   | No                                                   |                                                                                                           |                                                                                                                                                                                              |   |     |   |    |    |              |    |                   |
| 99  | Doesn't know                                         |                                                                                                           |                                                                                                                                                                                              |   |     |   |    |    |              |    |                   |
| 88  | Refused to answer                                    |                                                                                                           |                                                                                                                                                                                              |   |     |   |    |    |              |    |                   |
| 708 | [id10243]<br>Show the field ONLY if: [ageindays]>=28 | Did the baby have noticeable weight loss?                                                                 | radio<br><table border="1"> <tr><td>1</td><td>Yes</td></tr> <tr><td>0</td><td>No</td></tr> <tr><td>99</td><td>Doesn't know</td></tr> <tr><td>88</td><td>Refused to answer</td></tr> </table> | 1 | Yes | 0 | No | 99 | Doesn't know | 88 | Refused to answer |
| 1   | Yes                                                  |                                                                                                           |                                                                                                                                                                                              |   |     |   |    |    |              |    |                   |
| 0   | No                                                   |                                                                                                           |                                                                                                                                                                                              |   |     |   |    |    |              |    |                   |
| 99  | Doesn't know                                         |                                                                                                           |                                                                                                                                                                                              |   |     |   |    |    |              |    |                   |
| 88  | Refused to answer                                    |                                                                                                           |                                                                                                                                                                                              |   |     |   |    |    |              |    |                   |
| 709 | [id10244]<br>Show the field ONLY if: [ageindays]>=28 | Was the baby severely thin or wasted?                                                                     | radio<br><table border="1"> <tr><td>1</td><td>Yes</td></tr> <tr><td>0</td><td>No</td></tr> <tr><td>99</td><td>Doesn't know</td></tr> <tr><td>88</td><td>Refused to answer</td></tr> </table> | 1 | Yes | 0 | No | 99 | Doesn't know | 88 | Refused to answer |
| 1   | Yes                                                  |                                                                                                           |                                                                                                                                                                                              |   |     |   |    |    |              |    |                   |
| 0   | No                                                   |                                                                                                           |                                                                                                                                                                                              |   |     |   |    |    |              |    |                   |
| 99  | Doesn't know                                         |                                                                                                           |                                                                                                                                                                                              |   |     |   |    |    |              |    |                   |
| 88  | Refused to answer                                    |                                                                                                           |                                                                                                                                                                                              |   |     |   |    |    |              |    |                   |
| 710 | [id10245]<br>Show the field ONLY if: [ageindays]>=28 | During the illness that led to death, did the baby have a whitish rash inside the mouth or on the tongue? | radio<br><table border="1"> <tr><td>1</td><td>Yes</td></tr> <tr><td>0</td><td>No</td></tr> <tr><td>99</td><td>Doesn't know</td></tr> <tr><td>88</td><td>Refused to answer</td></tr> </table> | 1 | Yes | 0 | No | 99 | Doesn't know | 88 | Refused to answer |
| 1   | Yes                                                  |                                                                                                           |                                                                                                                                                                                              |   |     |   |    |    |              |    |                   |
| 0   | No                                                   |                                                                                                           |                                                                                                                                                                                              |   |     |   |    |    |              |    |                   |
| 99  | Doesn't know                                         |                                                                                                           |                                                                                                                                                                                              |   |     |   |    |    |              |    |                   |
| 88  | Refused to answer                                    |                                                                                                           |                                                                                                                                                                                              |   |     |   |    |    |              |    |                   |
| 711 | [id10246]<br>Show the field ONLY if: [ageindays]>=28 | Did the baby have stiffness of the whole body or was unable to open the mouth?                            | radio<br><table border="1"> <tr><td>1</td><td>Yes</td></tr> <tr><td>0</td><td>No</td></tr> <tr><td>99</td><td>Doesn't know</td></tr> <tr><td>88</td><td>Refused to answer</td></tr> </table> | 1 | Yes | 0 | No | 99 | Doesn't know | 88 | Refused to answer |
| 1   | Yes                                                  |                                                                                                           |                                                                                                                                                                                              |   |     |   |    |    |              |    |                   |
| 0   | No                                                   |                                                                                                           |                                                                                                                                                                                              |   |     |   |    |    |              |    |                   |
| 99  | Doesn't know                                         |                                                                                                           |                                                                                                                                                                                              |   |     |   |    |    |              |    |                   |
| 88  | Refused to answer                                    |                                                                                                           |                                                                                                                                                                                              |   |     |   |    |    |              |    |                   |
| 712 | [id10247]<br>Show the field ONLY if: [ageindays]>=28 | Did the baby have puffiness of the face?                                                                  | radio<br><table border="1"> <tr><td>1</td><td>Yes</td></tr> <tr><td>0</td><td>No</td></tr> <tr><td>99</td><td>Doesn't know</td></tr> <tr><td>88</td><td>Refused to answer</td></tr> </table> | 1 | Yes | 0 | No | 99 | Doesn't know | 88 | Refused to answer |
| 1   | Yes                                                  |                                                                                                           |                                                                                                                                                                                              |   |     |   |    |    |              |    |                   |
| 0   | No                                                   |                                                                                                           |                                                                                                                                                                                              |   |     |   |    |    |              |    |                   |
| 99  | Doesn't know                                         |                                                                                                           |                                                                                                                                                                                              |   |     |   |    |    |              |    |                   |
| 88  | Refused to answer                                    |                                                                                                           |                                                                                                                                                                                              |   |     |   |    |    |              |    |                   |
| 713 | [id10248]<br>Show the field ONLY if: [id10247]='1'   | For how many days did the baby have puffiness of the face?                                                | text                                                                                                                                                                                         |   |     |   |    |    |              |    |                   |
| 714 | [id10249]<br>Show the field ONLY if: [ageindays]>=28 | During the illness that led to death, did the baby have swollen legs or feet?                             | radio<br><table border="1"> <tr><td>1</td><td>Yes</td></tr> <tr><td>0</td><td>No</td></tr> <tr><td>99</td><td>Doesn't know</td></tr> <tr><td>88</td><td>Refused to answer</td></tr> </table> | 1 | Yes | 0 | No | 99 | Doesn't know | 88 | Refused to answer |
| 1   | Yes                                                  |                                                                                                           |                                                                                                                                                                                              |   |     |   |    |    |              |    |                   |
| 0   | No                                                   |                                                                                                           |                                                                                                                                                                                              |   |     |   |    |    |              |    |                   |
| 99  | Doesn't know                                         |                                                                                                           |                                                                                                                                                                                              |   |     |   |    |    |              |    |                   |
| 88  | Refused to answer                                    |                                                                                                           |                                                                                                                                                                                              |   |     |   |    |    |              |    |                   |

|     |                                                         |                                                           |                                                                                                                                                                                              |   |     |   |    |    |              |    |                   |
|-----|---------------------------------------------------------|-----------------------------------------------------------|----------------------------------------------------------------------------------------------------------------------------------------------------------------------------------------------|---|-----|---|----|----|--------------|----|-------------------|
| 715 | [id10250]<br>Show the field ONLY if:<br>[id10249]='1'   | How many days did the swelling last?                      | text                                                                                                                                                                                         |   |     |   |    |    |              |    |                   |
| 716 | [id10251]<br>Show the field ONLY if:<br>[id10249]='1'   | Did the baby have both feet swollen?                      | radio<br><table border="1"> <tr><td>1</td><td>Yes</td></tr> <tr><td>0</td><td>No</td></tr> <tr><td>99</td><td>Doesn't know</td></tr> <tr><td>88</td><td>Refused to answer</td></tr> </table> | 1 | Yes | 0 | No | 99 | Doesn't know | 88 | Refused to answer |
| 1   | Yes                                                     |                                                           |                                                                                                                                                                                              |   |     |   |    |    |              |    |                   |
| 0   | No                                                      |                                                           |                                                                                                                                                                                              |   |     |   |    |    |              |    |                   |
| 99  | Doesn't know                                            |                                                           |                                                                                                                                                                                              |   |     |   |    |    |              |    |                   |
| 88  | Refused to answer                                       |                                                           |                                                                                                                                                                                              |   |     |   |    |    |              |    |                   |
| 717 | [id10252]<br>Show the field ONLY if:<br>[ageindays]>=28 | Did the baby have general puffiness all over their body?  | radio<br><table border="1"> <tr><td>1</td><td>Yes</td></tr> <tr><td>0</td><td>No</td></tr> <tr><td>99</td><td>Doesn't know</td></tr> <tr><td>88</td><td>Refused to answer</td></tr> </table> | 1 | Yes | 0 | No | 99 | Doesn't know | 88 | Refused to answer |
| 1   | Yes                                                     |                                                           |                                                                                                                                                                                              |   |     |   |    |    |              |    |                   |
| 0   | No                                                      |                                                           |                                                                                                                                                                                              |   |     |   |    |    |              |    |                   |
| 99  | Doesn't know                                            |                                                           |                                                                                                                                                                                              |   |     |   |    |    |              |    |                   |
| 88  | Refused to answer                                       |                                                           |                                                                                                                                                                                              |   |     |   |    |    |              |    |                   |
| 718 | [id10253]<br>Show the field ONLY if:<br>[ageindays]>=28 | Did the baby have any lumps?                              | radio<br><table border="1"> <tr><td>1</td><td>Yes</td></tr> <tr><td>0</td><td>No</td></tr> <tr><td>99</td><td>Doesn't know</td></tr> <tr><td>88</td><td>Refused to answer</td></tr> </table> | 1 | Yes | 0 | No | 99 | Doesn't know | 88 | Refused to answer |
| 1   | Yes                                                     |                                                           |                                                                                                                                                                                              |   |     |   |    |    |              |    |                   |
| 0   | No                                                      |                                                           |                                                                                                                                                                                              |   |     |   |    |    |              |    |                   |
| 99  | Doesn't know                                            |                                                           |                                                                                                                                                                                              |   |     |   |    |    |              |    |                   |
| 88  | Refused to answer                                       |                                                           |                                                                                                                                                                                              |   |     |   |    |    |              |    |                   |
| 719 | [id10255]<br>Show the field ONLY if:<br>[id10253]='1'   | Did the baby have any lumps on the neck?                  | radio<br><table border="1"> <tr><td>1</td><td>Yes</td></tr> <tr><td>0</td><td>No</td></tr> <tr><td>99</td><td>Doesn't know</td></tr> <tr><td>88</td><td>Refused to answer</td></tr> </table> | 1 | Yes | 0 | No | 99 | Doesn't know | 88 | Refused to answer |
| 1   | Yes                                                     |                                                           |                                                                                                                                                                                              |   |     |   |    |    |              |    |                   |
| 0   | No                                                      |                                                           |                                                                                                                                                                                              |   |     |   |    |    |              |    |                   |
| 99  | Doesn't know                                            |                                                           |                                                                                                                                                                                              |   |     |   |    |    |              |    |                   |
| 88  | Refused to answer                                       |                                                           |                                                                                                                                                                                              |   |     |   |    |    |              |    |                   |
| 720 | [id10256]<br>Show the field ONLY if:<br>[id10253]='1'   | Did the baby have any lumps on the armpit?                | radio<br><table border="1"> <tr><td>1</td><td>Yes</td></tr> <tr><td>0</td><td>No</td></tr> <tr><td>99</td><td>Doesn't know</td></tr> <tr><td>88</td><td>Refused to answer</td></tr> </table> | 1 | Yes | 0 | No | 99 | Doesn't know | 88 | Refused to answer |
| 1   | Yes                                                     |                                                           |                                                                                                                                                                                              |   |     |   |    |    |              |    |                   |
| 0   | No                                                      |                                                           |                                                                                                                                                                                              |   |     |   |    |    |              |    |                   |
| 99  | Doesn't know                                            |                                                           |                                                                                                                                                                                              |   |     |   |    |    |              |    |                   |
| 88  | Refused to answer                                       |                                                           |                                                                                                                                                                                              |   |     |   |    |    |              |    |                   |
| 721 | [id10257]<br>Show the field ONLY if:<br>[id10253]='1'   | Did the baby have any lumps on the groin?                 | radio<br><table border="1"> <tr><td>1</td><td>Yes</td></tr> <tr><td>0</td><td>No</td></tr> <tr><td>99</td><td>Doesn't know</td></tr> <tr><td>88</td><td>Refused to answer</td></tr> </table> | 1 | Yes | 0 | No | 99 | Doesn't know | 88 | Refused to answer |
| 1   | Yes                                                     |                                                           |                                                                                                                                                                                              |   |     |   |    |    |              |    |                   |
| 0   | No                                                      |                                                           |                                                                                                                                                                                              |   |     |   |    |    |              |    |                   |
| 99  | Doesn't know                                            |                                                           |                                                                                                                                                                                              |   |     |   |    |    |              |    |                   |
| 88  | Refused to answer                                       |                                                           |                                                                                                                                                                                              |   |     |   |    |    |              |    |                   |
| 722 | [id10258]<br>Show the field ONLY if:<br>[ageindays]>=28 | Was the baby in any way paralysed?                        | radio<br><table border="1"> <tr><td>1</td><td>Yes</td></tr> <tr><td>0</td><td>No</td></tr> <tr><td>99</td><td>Doesn't know</td></tr> <tr><td>88</td><td>Refused to answer</td></tr> </table> | 1 | Yes | 0 | No | 99 | Doesn't know | 88 | Refused to answer |
| 1   | Yes                                                     |                                                           |                                                                                                                                                                                              |   |     |   |    |    |              |    |                   |
| 0   | No                                                      |                                                           |                                                                                                                                                                                              |   |     |   |    |    |              |    |                   |
| 99  | Doesn't know                                            |                                                           |                                                                                                                                                                                              |   |     |   |    |    |              |    |                   |
| 88  | Refused to answer                                       |                                                           |                                                                                                                                                                                              |   |     |   |    |    |              |    |                   |
| 723 | [id10259]<br>Show the field ONLY if:<br>[id10258]='1'   | Did the baby have paralysis of only one side of the body? | radio<br><table border="1"> <tr><td>1</td><td>Yes</td></tr> <tr><td>0</td><td>No</td></tr> <tr><td>99</td><td>Doesn't know</td></tr> <tr><td>88</td><td>Refused to answer</td></tr> </table> | 1 | Yes | 0 | No | 99 | Doesn't know | 88 | Refused to answer |
| 1   | Yes                                                     |                                                           |                                                                                                                                                                                              |   |     |   |    |    |              |    |                   |
| 0   | No                                                      |                                                           |                                                                                                                                                                                              |   |     |   |    |    |              |    |                   |
| 99  | Doesn't know                                            |                                                           |                                                                                                                                                                                              |   |     |   |    |    |              |    |                   |
| 88  | Refused to answer                                       |                                                           |                                                                                                                                                                                              |   |     |   |    |    |              |    |                   |

|     |                                                                                                                               |                                                                                                                                                                                                                                                                                |                                                                                                                                                                                                                                                                                                                                                                                                                                                                                                                                       |   |            |            |    |            |              |    |                   |                    |   |            |                    |   |            |              |   |            |              |   |            |            |   |            |       |
|-----|-------------------------------------------------------------------------------------------------------------------------------|--------------------------------------------------------------------------------------------------------------------------------------------------------------------------------------------------------------------------------------------------------------------------------|---------------------------------------------------------------------------------------------------------------------------------------------------------------------------------------------------------------------------------------------------------------------------------------------------------------------------------------------------------------------------------------------------------------------------------------------------------------------------------------------------------------------------------------|---|------------|------------|----|------------|--------------|----|-------------------|--------------------|---|------------|--------------------|---|------------|--------------|---|------------|--------------|---|------------|------------|---|------------|-------|
| 724 | [id10260]<br>Show the field ONLY if:<br>[id10258]='1'                                                                         | Which were the limbs or body parts paralysed?                                                                                                                                                                                                                                  | checkbox<br><table border="1"> <tr><td>1</td><td>id10260__1</td><td>Right side</td></tr> <tr><td>2</td><td>id10260__2</td><td>Left side</td></tr> <tr><td>3</td><td>id10260__3</td><td>Lower part of body</td></tr> <tr><td>4</td><td>id10260__4</td><td>Upper part of body</td></tr> <tr><td>5</td><td>id10260__5</td><td>One leg only</td></tr> <tr><td>6</td><td>id10260__6</td><td>One arm only</td></tr> <tr><td>7</td><td>id10260__7</td><td>Whole body</td></tr> <tr><td>8</td><td>id10260__8</td><td>Other</td></tr> </table> | 1 | id10260__1 | Right side | 2  | id10260__2 | Left side    | 3  | id10260__3        | Lower part of body | 4 | id10260__4 | Upper part of body | 5 | id10260__5 | One leg only | 6 | id10260__6 | One arm only | 7 | id10260__7 | Whole body | 8 | id10260__8 | Other |
| 1   | id10260__1                                                                                                                    | Right side                                                                                                                                                                                                                                                                     |                                                                                                                                                                                                                                                                                                                                                                                                                                                                                                                                       |   |            |            |    |            |              |    |                   |                    |   |            |                    |   |            |              |   |            |              |   |            |            |   |            |       |
| 2   | id10260__2                                                                                                                    | Left side                                                                                                                                                                                                                                                                      |                                                                                                                                                                                                                                                                                                                                                                                                                                                                                                                                       |   |            |            |    |            |              |    |                   |                    |   |            |                    |   |            |              |   |            |              |   |            |            |   |            |       |
| 3   | id10260__3                                                                                                                    | Lower part of body                                                                                                                                                                                                                                                             |                                                                                                                                                                                                                                                                                                                                                                                                                                                                                                                                       |   |            |            |    |            |              |    |                   |                    |   |            |                    |   |            |              |   |            |              |   |            |            |   |            |       |
| 4   | id10260__4                                                                                                                    | Upper part of body                                                                                                                                                                                                                                                             |                                                                                                                                                                                                                                                                                                                                                                                                                                                                                                                                       |   |            |            |    |            |              |    |                   |                    |   |            |                    |   |            |              |   |            |              |   |            |            |   |            |       |
| 5   | id10260__5                                                                                                                    | One leg only                                                                                                                                                                                                                                                                   |                                                                                                                                                                                                                                                                                                                                                                                                                                                                                                                                       |   |            |            |    |            |              |    |                   |                    |   |            |                    |   |            |              |   |            |              |   |            |            |   |            |       |
| 6   | id10260__6                                                                                                                    | One arm only                                                                                                                                                                                                                                                                   |                                                                                                                                                                                                                                                                                                                                                                                                                                                                                                                                       |   |            |            |    |            |              |    |                   |                    |   |            |                    |   |            |              |   |            |              |   |            |            |   |            |       |
| 7   | id10260__7                                                                                                                    | Whole body                                                                                                                                                                                                                                                                     |                                                                                                                                                                                                                                                                                                                                                                                                                                                                                                                                       |   |            |            |    |            |              |    |                   |                    |   |            |                    |   |            |              |   |            |              |   |            |            |   |            |       |
| 8   | id10260__8                                                                                                                    | Other                                                                                                                                                                                                                                                                          |                                                                                                                                                                                                                                                                                                                                                                                                                                                                                                                                       |   |            |            |    |            |              |    |                   |                    |   |            |                    |   |            |              |   |            |              |   |            |            |   |            |       |
| 725 | [id10260_check]<br>Show the field ONLY if:<br>[id10258]='1' AND (([id10260(1)]='1' AND [id10260(2)]='1') OR [id10260(7)]='1') | It is not possible to select "only one side paralysed" and "left and right side" or "whole body" together. Please go back and correct the selection.                                                                                                                           | descriptive                                                                                                                                                                                                                                                                                                                                                                                                                                                                                                                           |   |            |            |    |            |              |    |                   |                    |   |            |                    |   |            |              |   |            |              |   |            |            |   |            |       |
| 726 | [id10261]<br>Show the field ONLY if:<br>[ageindays]>=28                                                                       | Did the baby have difficulty swallowing?<br><i>Explain to the respondent that this could mean choking or coughing each time the baby fed.</i>                                                                                                                                  | radio<br><table border="1"> <tr><td>1</td><td>Yes</td></tr> <tr><td>0</td><td>No</td></tr> <tr><td>99</td><td>Doesn't know</td></tr> <tr><td>88</td><td>Refused to answer</td></tr> </table>                                                                                                                                                                                                                                                                                                                                          | 1 | Yes        | 0          | No | 99         | Doesn't know | 88 | Refused to answer |                    |   |            |                    |   |            |              |   |            |              |   |            |            |   |            |       |
| 1   | Yes                                                                                                                           |                                                                                                                                                                                                                                                                                |                                                                                                                                                                                                                                                                                                                                                                                                                                                                                                                                       |   |            |            |    |            |              |    |                   |                    |   |            |                    |   |            |              |   |            |              |   |            |            |   |            |       |
| 0   | No                                                                                                                            |                                                                                                                                                                                                                                                                                |                                                                                                                                                                                                                                                                                                                                                                                                                                                                                                                                       |   |            |            |    |            |              |    |                   |                    |   |            |                    |   |            |              |   |            |              |   |            |            |   |            |       |
| 99  | Doesn't know                                                                                                                  |                                                                                                                                                                                                                                                                                |                                                                                                                                                                                                                                                                                                                                                                                                                                                                                                                                       |   |            |            |    |            |              |    |                   |                    |   |            |                    |   |            |              |   |            |              |   |            |            |   |            |       |
| 88  | Refused to answer                                                                                                             |                                                                                                                                                                                                                                                                                |                                                                                                                                                                                                                                                                                                                                                                                                                                                                                                                                       |   |            |            |    |            |              |    |                   |                    |   |            |                    |   |            |              |   |            |              |   |            |            |   |            |       |
| 727 | [id10262]<br>Show the field ONLY if:<br>[id10261]='1'                                                                         | For how many days before death did the baby have difficulty swallowing?                                                                                                                                                                                                        | text                                                                                                                                                                                                                                                                                                                                                                                                                                                                                                                                  |   |            |            |    |            |              |    |                   |                    |   |            |                    |   |            |              |   |            |              |   |            |            |   |            |       |
| 728 | [id10265]                                                                                                                     | Did the baby have yellow discoloration of the eyes?                                                                                                                                                                                                                            | radio<br><table border="1"> <tr><td>1</td><td>Yes</td></tr> <tr><td>0</td><td>No</td></tr> <tr><td>99</td><td>Doesn't know</td></tr> <tr><td>88</td><td>Refused to answer</td></tr> </table>                                                                                                                                                                                                                                                                                                                                          | 1 | Yes        | 0          | No | 99         | Doesn't know | 88 | Refused to answer |                    |   |            |                    |   |            |              |   |            |              |   |            |            |   |            |       |
| 1   | Yes                                                                                                                           |                                                                                                                                                                                                                                                                                |                                                                                                                                                                                                                                                                                                                                                                                                                                                                                                                                       |   |            |            |    |            |              |    |                   |                    |   |            |                    |   |            |              |   |            |              |   |            |            |   |            |       |
| 0   | No                                                                                                                            |                                                                                                                                                                                                                                                                                |                                                                                                                                                                                                                                                                                                                                                                                                                                                                                                                                       |   |            |            |    |            |              |    |                   |                    |   |            |                    |   |            |              |   |            |              |   |            |            |   |            |       |
| 99  | Doesn't know                                                                                                                  |                                                                                                                                                                                                                                                                                |                                                                                                                                                                                                                                                                                                                                                                                                                                                                                                                                       |   |            |            |    |            |              |    |                   |                    |   |            |                    |   |            |              |   |            |              |   |            |            |   |            |       |
| 88  | Refused to answer                                                                                                             |                                                                                                                                                                                                                                                                                |                                                                                                                                                                                                                                                                                                                                                                                                                                                                                                                                       |   |            |            |    |            |              |    |                   |                    |   |            |                    |   |            |              |   |            |              |   |            |            |   |            |       |
| 729 | [id10266]<br>Show the field ONLY if:<br>[id10265]='1' and [ageindays] >=28                                                    | For how many days did the baby have the yellow discoloration?                                                                                                                                                                                                                  | text                                                                                                                                                                                                                                                                                                                                                                                                                                                                                                                                  |   |            |            |    |            |              |    |                   |                    |   |            |                    |   |            |              |   |            |              |   |            |            |   |            |       |
| 730 | [id10268]<br>Show the field ONLY if:<br>[ageindays]>=28                                                                       | Did the baby look pale (thinning/lack of blood) or have pale palms, eyes or nail beds?<br><i>Long term deficiency of the blood results in a pale, whitish appearance of the lips, tongue, and eye sac. Sometime it is referred to as thinning or lack of blood, or pallor.</i> | radio<br><table border="1"> <tr><td>1</td><td>Yes</td></tr> <tr><td>0</td><td>No</td></tr> <tr><td>99</td><td>Doesn't know</td></tr> <tr><td>88</td><td>Refused to answer</td></tr> </table>                                                                                                                                                                                                                                                                                                                                          | 1 | Yes        | 0          | No | 99         | Doesn't know | 88 | Refused to answer |                    |   |            |                    |   |            |              |   |            |              |   |            |            |   |            |       |
| 1   | Yes                                                                                                                           |                                                                                                                                                                                                                                                                                |                                                                                                                                                                                                                                                                                                                                                                                                                                                                                                                                       |   |            |            |    |            |              |    |                   |                    |   |            |                    |   |            |              |   |            |              |   |            |            |   |            |       |
| 0   | No                                                                                                                            |                                                                                                                                                                                                                                                                                |                                                                                                                                                                                                                                                                                                                                                                                                                                                                                                                                       |   |            |            |    |            |              |    |                   |                    |   |            |                    |   |            |              |   |            |              |   |            |            |   |            |       |
| 99  | Doesn't know                                                                                                                  |                                                                                                                                                                                                                                                                                |                                                                                                                                                                                                                                                                                                                                                                                                                                                                                                                                       |   |            |            |    |            |              |    |                   |                    |   |            |                    |   |            |              |   |            |              |   |            |            |   |            |       |
| 88  | Refused to answer                                                                                                             |                                                                                                                                                                                                                                                                                |                                                                                                                                                                                                                                                                                                                                                                                                                                                                                                                                       |   |            |            |    |            |              |    |                   |                    |   |            |                    |   |            |              |   |            |              |   |            |            |   |            |       |
| 731 | [id10269]<br>Show the field ONLY if:<br>[ageindays]>=28                                                                       | Did the baby have sunken eyes?                                                                                                                                                                                                                                                 | radio<br><table border="1"> <tr><td>1</td><td>Yes</td></tr> <tr><td>0</td><td>No</td></tr> <tr><td>99</td><td>Doesn't know</td></tr> <tr><td>88</td><td>Refused to answer</td></tr> </table>                                                                                                                                                                                                                                                                                                                                          | 1 | Yes        | 0          | No | 99         | Doesn't know | 88 | Refused to answer |                    |   |            |                    |   |            |              |   |            |              |   |            |            |   |            |       |
| 1   | Yes                                                                                                                           |                                                                                                                                                                                                                                                                                |                                                                                                                                                                                                                                                                                                                                                                                                                                                                                                                                       |   |            |            |    |            |              |    |                   |                    |   |            |                    |   |            |              |   |            |              |   |            |            |   |            |       |
| 0   | No                                                                                                                            |                                                                                                                                                                                                                                                                                |                                                                                                                                                                                                                                                                                                                                                                                                                                                                                                                                       |   |            |            |    |            |              |    |                   |                    |   |            |                    |   |            |              |   |            |              |   |            |            |   |            |       |
| 99  | Doesn't know                                                                                                                  |                                                                                                                                                                                                                                                                                |                                                                                                                                                                                                                                                                                                                                                                                                                                                                                                                                       |   |            |            |    |            |              |    |                   |                    |   |            |                    |   |            |              |   |            |              |   |            |            |   |            |       |
| 88  | Refused to answer                                                                                                             |                                                                                                                                                                                                                                                                                |                                                                                                                                                                                                                                                                                                                                                                                                                                                                                                                                       |   |            |            |    |            |              |    |                   |                    |   |            |                    |   |            |              |   |            |              |   |            |            |   |            |       |
| 732 | [id10271]                                                                                                                     | Was the baby able to suckle or bottle-feed within the first 24 hours after birth?                                                                                                                                                                                              | radio<br><table border="1"> <tr><td>1</td><td>Yes</td></tr> <tr><td>0</td><td>No</td></tr> <tr><td>99</td><td>Doesn't know</td></tr> <tr><td>88</td><td>Refused to answer</td></tr> </table>                                                                                                                                                                                                                                                                                                                                          | 1 | Yes        | 0          | No | 99         | Doesn't know | 88 | Refused to answer |                    |   |            |                    |   |            |              |   |            |              |   |            |            |   |            |       |
| 1   | Yes                                                                                                                           |                                                                                                                                                                                                                                                                                |                                                                                                                                                                                                                                                                                                                                                                                                                                                                                                                                       |   |            |            |    |            |              |    |                   |                    |   |            |                    |   |            |              |   |            |              |   |            |            |   |            |       |
| 0   | No                                                                                                                            |                                                                                                                                                                                                                                                                                |                                                                                                                                                                                                                                                                                                                                                                                                                                                                                                                                       |   |            |            |    |            |              |    |                   |                    |   |            |                    |   |            |              |   |            |              |   |            |            |   |            |       |
| 99  | Doesn't know                                                                                                                  |                                                                                                                                                                                                                                                                                |                                                                                                                                                                                                                                                                                                                                                                                                                                                                                                                                       |   |            |            |    |            |              |    |                   |                    |   |            |                    |   |            |              |   |            |              |   |            |            |   |            |       |
| 88  | Refused to answer                                                                                                             |                                                                                                                                                                                                                                                                                |                                                                                                                                                                                                                                                                                                                                                                                                                                                                                                                                       |   |            |            |    |            |              |    |                   |                    |   |            |                    |   |            |              |   |            |              |   |            |            |   |            |       |
| 733 | [id10272]                                                                                                                     | Did the baby ever suckle in a normal way?                                                                                                                                                                                                                                      | radio<br><table border="1"> <tr><td>1</td><td>Yes</td></tr> <tr><td>0</td><td>No</td></tr> <tr><td>99</td><td>Doesn't know</td></tr> <tr><td>88</td><td>Refused to answer</td></tr> </table>                                                                                                                                                                                                                                                                                                                                          | 1 | Yes        | 0          | No | 99         | Doesn't know | 88 | Refused to answer |                    |   |            |                    |   |            |              |   |            |              |   |            |            |   |            |       |
| 1   | Yes                                                                                                                           |                                                                                                                                                                                                                                                                                |                                                                                                                                                                                                                                                                                                                                                                                                                                                                                                                                       |   |            |            |    |            |              |    |                   |                    |   |            |                    |   |            |              |   |            |              |   |            |            |   |            |       |
| 0   | No                                                                                                                            |                                                                                                                                                                                                                                                                                |                                                                                                                                                                                                                                                                                                                                                                                                                                                                                                                                       |   |            |            |    |            |              |    |                   |                    |   |            |                    |   |            |              |   |            |              |   |            |            |   |            |       |
| 99  | Doesn't know                                                                                                                  |                                                                                                                                                                                                                                                                                |                                                                                                                                                                                                                                                                                                                                                                                                                                                                                                                                       |   |            |            |    |            |              |    |                   |                    |   |            |                    |   |            |              |   |            |              |   |            |            |   |            |       |
| 88  | Refused to answer                                                                                                             |                                                                                                                                                                                                                                                                                |                                                                                                                                                                                                                                                                                                                                                                                                                                                                                                                                       |   |            |            |    |            |              |    |                   |                    |   |            |                    |   |            |              |   |            |              |   |            |            |   |            |       |

|     |                                                                                                               |                                                                                                                            |                                                                                                                                                                                              |   |     |   |    |    |              |    |                   |
|-----|---------------------------------------------------------------------------------------------------------------|----------------------------------------------------------------------------------------------------------------------------|----------------------------------------------------------------------------------------------------------------------------------------------------------------------------------------------|---|-----|---|----|----|--------------|----|-------------------|
| 734 | [id10273]                                                                                                     | Did the baby stop suckling?                                                                                                | radio<br><table border="1"> <tr><td>1</td><td>Yes</td></tr> <tr><td>0</td><td>No</td></tr> <tr><td>99</td><td>Doesn't know</td></tr> <tr><td>88</td><td>Refused to answer</td></tr> </table> | 1 | Yes | 0 | No | 99 | Doesn't know | 88 | Refused to answer |
| 1   | Yes                                                                                                           |                                                                                                                            |                                                                                                                                                                                              |   |     |   |    |    |              |    |                   |
| 0   | No                                                                                                            |                                                                                                                            |                                                                                                                                                                                              |   |     |   |    |    |              |    |                   |
| 99  | Doesn't know                                                                                                  |                                                                                                                            |                                                                                                                                                                                              |   |     |   |    |    |              |    |                   |
| 88  | Refused to answer                                                                                             |                                                                                                                            |                                                                                                                                                                                              |   |     |   |    |    |              |    |                   |
| 735 | [id10274]<br>Show the field ONLY if:<br>[id10273]='1'                                                         | How many days after birth did the baby stop suckling?                                                                      | text                                                                                                                                                                                         |   |     |   |    |    |              |    |                   |
| 736 | [id10275]                                                                                                     | Did the baby have convulsions starting within the first 24 hours of life?                                                  | radio<br><table border="1"> <tr><td>1</td><td>Yes</td></tr> <tr><td>0</td><td>No</td></tr> <tr><td>99</td><td>Doesn't know</td></tr> <tr><td>88</td><td>Refused to answer</td></tr> </table> | 1 | Yes | 0 | No | 99 | Doesn't know | 88 | Refused to answer |
| 1   | Yes                                                                                                           |                                                                                                                            |                                                                                                                                                                                              |   |     |   |    |    |              |    |                   |
| 0   | No                                                                                                            |                                                                                                                            |                                                                                                                                                                                              |   |     |   |    |    |              |    |                   |
| 99  | Doesn't know                                                                                                  |                                                                                                                            |                                                                                                                                                                                              |   |     |   |    |    |              |    |                   |
| 88  | Refused to answer                                                                                             |                                                                                                                            |                                                                                                                                                                                              |   |     |   |    |    |              |    |                   |
| 737 | [id10276]<br>Show the field ONLY if:<br>[id10275]='0' or [id10275]='99'<br>or [id10275]='88'                  | Did the baby have convulsions starting more than 24 hours after birth?                                                     | radio<br><table border="1"> <tr><td>1</td><td>Yes</td></tr> <tr><td>0</td><td>No</td></tr> <tr><td>99</td><td>Doesn't know</td></tr> <tr><td>88</td><td>Refused to answer</td></tr> </table> | 1 | Yes | 0 | No | 99 | Doesn't know | 88 | Refused to answer |
| 1   | Yes                                                                                                           |                                                                                                                            |                                                                                                                                                                                              |   |     |   |    |    |              |    |                   |
| 0   | No                                                                                                            |                                                                                                                            |                                                                                                                                                                                              |   |     |   |    |    |              |    |                   |
| 99  | Doesn't know                                                                                                  |                                                                                                                            |                                                                                                                                                                                              |   |     |   |    |    |              |    |                   |
| 88  | Refused to answer                                                                                             |                                                                                                                            |                                                                                                                                                                                              |   |     |   |    |    |              |    |                   |
| 738 | [id10277]                                                                                                     | Did the baby's body become stiff, with the back arched backwards?                                                          | radio<br><table border="1"> <tr><td>1</td><td>Yes</td></tr> <tr><td>0</td><td>No</td></tr> <tr><td>99</td><td>Doesn't know</td></tr> <tr><td>88</td><td>Refused to answer</td></tr> </table> | 1 | Yes | 0 | No | 99 | Doesn't know | 88 | Refused to answer |
| 1   | Yes                                                                                                           |                                                                                                                            |                                                                                                                                                                                              |   |     |   |    |    |              |    |                   |
| 0   | No                                                                                                            |                                                                                                                            |                                                                                                                                                                                              |   |     |   |    |    |              |    |                   |
| 99  | Doesn't know                                                                                                  |                                                                                                                            |                                                                                                                                                                                              |   |     |   |    |    |              |    |                   |
| 88  | Refused to answer                                                                                             |                                                                                                                            |                                                                                                                                                                                              |   |     |   |    |    |              |    |                   |
| 739 | [id10278]                                                                                                     | During the illness that led to death, did the baby have a bulging or raised fontanelle?<br><i>Show photo if available.</i> | radio<br><table border="1"> <tr><td>1</td><td>Yes</td></tr> <tr><td>0</td><td>No</td></tr> <tr><td>99</td><td>Doesn't know</td></tr> <tr><td>88</td><td>Refused to answer</td></tr> </table> | 1 | Yes | 0 | No | 99 | Doesn't know | 88 | Refused to answer |
| 1   | Yes                                                                                                           |                                                                                                                            |                                                                                                                                                                                              |   |     |   |    |    |              |    |                   |
| 0   | No                                                                                                            |                                                                                                                            |                                                                                                                                                                                              |   |     |   |    |    |              |    |                   |
| 99  | Doesn't know                                                                                                  |                                                                                                                            |                                                                                                                                                                                              |   |     |   |    |    |              |    |                   |
| 88  | Refused to answer                                                                                             |                                                                                                                            |                                                                                                                                                                                              |   |     |   |    |    |              |    |                   |
| 740 | [id10279]                                                                                                     | During the illness that led to death, did the baby have a sunken fontanelle?<br><i>Show photo if available.</i>            | radio<br><table border="1"> <tr><td>1</td><td>Yes</td></tr> <tr><td>0</td><td>No</td></tr> <tr><td>99</td><td>Doesn't know</td></tr> <tr><td>88</td><td>Refused to answer</td></tr> </table> | 1 | Yes | 0 | No | 99 | Doesn't know | 88 | Refused to answer |
| 1   | Yes                                                                                                           |                                                                                                                            |                                                                                                                                                                                              |   |     |   |    |    |              |    |                   |
| 0   | No                                                                                                            |                                                                                                                            |                                                                                                                                                                                              |   |     |   |    |    |              |    |                   |
| 99  | Doesn't know                                                                                                  |                                                                                                                            |                                                                                                                                                                                              |   |     |   |    |    |              |    |                   |
| 88  | Refused to answer                                                                                             |                                                                                                                            |                                                                                                                                                                                              |   |     |   |    |    |              |    |                   |
| 741 | [id10281]                                                                                                     | During the illness that led to death, did the baby become unresponsive or unconscious?                                     | radio<br><table border="1"> <tr><td>1</td><td>Yes</td></tr> <tr><td>0</td><td>No</td></tr> <tr><td>99</td><td>Doesn't know</td></tr> <tr><td>88</td><td>Refused to answer</td></tr> </table> | 1 | Yes | 0 | No | 99 | Doesn't know | 88 | Refused to answer |
| 1   | Yes                                                                                                           |                                                                                                                            |                                                                                                                                                                                              |   |     |   |    |    |              |    |                   |
| 0   | No                                                                                                            |                                                                                                                            |                                                                                                                                                                                              |   |     |   |    |    |              |    |                   |
| 99  | Doesn't know                                                                                                  |                                                                                                                            |                                                                                                                                                                                              |   |     |   |    |    |              |    |                   |
| 88  | Refused to answer                                                                                             |                                                                                                                            |                                                                                                                                                                                              |   |     |   |    |    |              |    |                   |
| 742 | [id10282]<br>Show the field ONLY if:<br>[id10281]='1'                                                         | Did the baby become unresponsive or unconscious soon after birth, within less than 24 hours?                               | radio<br><table border="1"> <tr><td>1</td><td>Yes</td></tr> <tr><td>0</td><td>No</td></tr> <tr><td>99</td><td>Doesn't know</td></tr> <tr><td>88</td><td>Refused to answer</td></tr> </table> | 1 | Yes | 0 | No | 99 | Doesn't know | 88 | Refused to answer |
| 1   | Yes                                                                                                           |                                                                                                                            |                                                                                                                                                                                              |   |     |   |    |    |              |    |                   |
| 0   | No                                                                                                            |                                                                                                                            |                                                                                                                                                                                              |   |     |   |    |    |              |    |                   |
| 99  | Doesn't know                                                                                                  |                                                                                                                            |                                                                                                                                                                                              |   |     |   |    |    |              |    |                   |
| 88  | Refused to answer                                                                                             |                                                                                                                            |                                                                                                                                                                                              |   |     |   |    |    |              |    |                   |
| 743 | [id10283]<br>Show the field ONLY if:<br>[id10281]='1' and ([id10282]='0' or [id10282]='99' or [id10282]='88') | Did the baby become unresponsive or unconscious more than 24 hours after birth?                                            | radio<br><table border="1"> <tr><td>1</td><td>Yes</td></tr> <tr><td>0</td><td>No</td></tr> <tr><td>99</td><td>Doesn't know</td></tr> <tr><td>88</td><td>Refused to answer</td></tr> </table> | 1 | Yes | 0 | No | 99 | Doesn't know | 88 | Refused to answer |
| 1   | Yes                                                                                                           |                                                                                                                            |                                                                                                                                                                                              |   |     |   |    |    |              |    |                   |
| 0   | No                                                                                                            |                                                                                                                            |                                                                                                                                                                                              |   |     |   |    |    |              |    |                   |
| 99  | Doesn't know                                                                                                  |                                                                                                                            |                                                                                                                                                                                              |   |     |   |    |    |              |    |                   |
| 88  | Refused to answer                                                                                             |                                                                                                                            |                                                                                                                                                                                              |   |     |   |    |    |              |    |                   |

|     |                                                    |                                                                                                                                                                                                                                          |                                                                                                                                                                                                             |   |       |   |                 |    |              |    |                   |
|-----|----------------------------------------------------|------------------------------------------------------------------------------------------------------------------------------------------------------------------------------------------------------------------------------------------|-------------------------------------------------------------------------------------------------------------------------------------------------------------------------------------------------------------|---|-------|---|-----------------|----|--------------|----|-------------------|
| 744 | [id10284]                                          | During the illness that led to death, did the baby become cold to touch?                                                                                                                                                                 | radio<br><table border="1"> <tr><td>1</td><td>Yes</td></tr> <tr><td>0</td><td>No</td></tr> <tr><td>99</td><td>Doesn't know</td></tr> <tr><td>88</td><td>Refused to answer</td></tr> </table>                | 1 | Yes   | 0 | No              | 99 | Doesn't know | 88 | Refused to answer |
| 1   | Yes                                                |                                                                                                                                                                                                                                          |                                                                                                                                                                                                             |   |       |   |                 |    |              |    |                   |
| 0   | No                                                 |                                                                                                                                                                                                                                          |                                                                                                                                                                                                             |   |       |   |                 |    |              |    |                   |
| 99  | Doesn't know                                       |                                                                                                                                                                                                                                          |                                                                                                                                                                                                             |   |       |   |                 |    |              |    |                   |
| 88  | Refused to answer                                  |                                                                                                                                                                                                                                          |                                                                                                                                                                                                             |   |       |   |                 |    |              |    |                   |
| 745 | [id10285]<br>Show the field ONLY if: [id10284]='1' | How many days old was the baby when it started feeling cold to touch?<br><i>If less than 1 day or 24 hours, enter 0 days. Use 1 week = 7 days to determine the number of days. For don't know, enter "99." For refused, enter "88."</i>  | text                                                                                                                                                                                                        |   |       |   |                 |    |              |    |                   |
| 746 | [id10286]                                          | During the illness that led to death, did the baby become lethargic after a period of normal activity?                                                                                                                                   | radio<br><table border="1"> <tr><td>1</td><td>Yes</td></tr> <tr><td>0</td><td>No</td></tr> <tr><td>99</td><td>Doesn't know</td></tr> <tr><td>88</td><td>Refused to answer</td></tr> </table>                | 1 | Yes   | 0 | No              | 99 | Doesn't know | 88 | Refused to answer |
| 1   | Yes                                                |                                                                                                                                                                                                                                          |                                                                                                                                                                                                             |   |       |   |                 |    |              |    |                   |
| 0   | No                                                 |                                                                                                                                                                                                                                          |                                                                                                                                                                                                             |   |       |   |                 |    |              |    |                   |
| 99  | Doesn't know                                       |                                                                                                                                                                                                                                          |                                                                                                                                                                                                             |   |       |   |                 |    |              |    |                   |
| 88  | Refused to answer                                  |                                                                                                                                                                                                                                          |                                                                                                                                                                                                             |   |       |   |                 |    |              |    |                   |
| 747 | [id10287]                                          | Did the baby have redness or pus drainage from the umbilical cord stump?                                                                                                                                                                 | radio<br><table border="1"> <tr><td>1</td><td>Yes</td></tr> <tr><td>0</td><td>No</td></tr> <tr><td>99</td><td>Doesn't know</td></tr> <tr><td>88</td><td>Refused to answer</td></tr> </table>                | 1 | Yes   | 0 | No              | 99 | Doesn't know | 88 | Refused to answer |
| 1   | Yes                                                |                                                                                                                                                                                                                                          |                                                                                                                                                                                                             |   |       |   |                 |    |              |    |                   |
| 0   | No                                                 |                                                                                                                                                                                                                                          |                                                                                                                                                                                                             |   |       |   |                 |    |              |    |                   |
| 99  | Doesn't know                                       |                                                                                                                                                                                                                                          |                                                                                                                                                                                                             |   |       |   |                 |    |              |    |                   |
| 88  | Refused to answer                                  |                                                                                                                                                                                                                                          |                                                                                                                                                                                                             |   |       |   |                 |    |              |    |                   |
| 748 | [id10288]                                          | During the illness that led to death, did the baby have skin ulcer(s) or pits?                                                                                                                                                           | radio<br><table border="1"> <tr><td>1</td><td>Yes</td></tr> <tr><td>0</td><td>No</td></tr> <tr><td>99</td><td>Doesn't know</td></tr> <tr><td>88</td><td>Refused to answer</td></tr> </table>                | 1 | Yes   | 0 | No              | 99 | Doesn't know | 88 | Refused to answer |
| 1   | Yes                                                |                                                                                                                                                                                                                                          |                                                                                                                                                                                                             |   |       |   |                 |    |              |    |                   |
| 0   | No                                                 |                                                                                                                                                                                                                                          |                                                                                                                                                                                                             |   |       |   |                 |    |              |    |                   |
| 99  | Doesn't know                                       |                                                                                                                                                                                                                                          |                                                                                                                                                                                                             |   |       |   |                 |    |              |    |                   |
| 88  | Refused to answer                                  |                                                                                                                                                                                                                                          |                                                                                                                                                                                                             |   |       |   |                 |    |              |    |                   |
| 749 | [id10289]                                          | During the illness that led to death, did the baby have yellow skin, palms (hand) or soles (foot)?                                                                                                                                       | radio<br><table border="1"> <tr><td>1</td><td>Yes</td></tr> <tr><td>0</td><td>No</td></tr> <tr><td>99</td><td>Doesn't know</td></tr> <tr><td>88</td><td>Refused to answer</td></tr> </table>                | 1 | Yes   | 0 | No              | 99 | Doesn't know | 88 | Refused to answer |
| 1   | Yes                                                |                                                                                                                                                                                                                                          |                                                                                                                                                                                                             |   |       |   |                 |    |              |    |                   |
| 0   | No                                                 |                                                                                                                                                                                                                                          |                                                                                                                                                                                                             |   |       |   |                 |    |              |    |                   |
| 99  | Doesn't know                                       |                                                                                                                                                                                                                                          |                                                                                                                                                                                                             |   |       |   |                 |    |              |    |                   |
| 88  | Refused to answer                                  |                                                                                                                                                                                                                                          |                                                                                                                                                                                                             |   |       |   |                 |    |              |    |                   |
| 750 | [id10354]                                          | Section Header: <i>Other Medical History</i><br>Was the child part of a multiple birth?<br><i>If two or more children are born at the same time, it is counted as a multiple birth, even if one or more of the babies are born dead.</i> | radio<br><table border="1"> <tr><td>1</td><td>Yes</td></tr> <tr><td>0</td><td>No</td></tr> <tr><td>99</td><td>Doesn't know</td></tr> <tr><td>88</td><td>Refused to answer</td></tr> </table>                | 1 | Yes   | 0 | No              | 99 | Doesn't know | 88 | Refused to answer |
| 1   | Yes                                                |                                                                                                                                                                                                                                          |                                                                                                                                                                                                             |   |       |   |                 |    |              |    |                   |
| 0   | No                                                 |                                                                                                                                                                                                                                          |                                                                                                                                                                                                             |   |       |   |                 |    |              |    |                   |
| 99  | Doesn't know                                       |                                                                                                                                                                                                                                          |                                                                                                                                                                                                             |   |       |   |                 |    |              |    |                   |
| 88  | Refused to answer                                  |                                                                                                                                                                                                                                          |                                                                                                                                                                                                             |   |       |   |                 |    |              |    |                   |
| 751 | [id10355]<br>Show the field ONLY if: [id10354]='1' | Was the child the first, second, or later in the birth order?                                                                                                                                                                            | radio<br><table border="1"> <tr><td>1</td><td>First</td></tr> <tr><td>2</td><td>Second or later</td></tr> <tr><td>99</td><td>Doesn't know</td></tr> <tr><td>88</td><td>Refused to answer</td></tr> </table> | 1 | First | 2 | Second or later | 99 | Doesn't know | 88 | Refused to answer |
| 1   | First                                              |                                                                                                                                                                                                                                          |                                                                                                                                                                                                             |   |       |   |                 |    |              |    |                   |
| 2   | Second or later                                    |                                                                                                                                                                                                                                          |                                                                                                                                                                                                             |   |       |   |                 |    |              |    |                   |
| 99  | Doesn't know                                       |                                                                                                                                                                                                                                          |                                                                                                                                                                                                             |   |       |   |                 |    |              |    |                   |
| 88  | Refused to answer                                  |                                                                                                                                                                                                                                          |                                                                                                                                                                                                             |   |       |   |                 |    |              |    |                   |
| 752 | [id10435]                                          | Did a health care worker tell you the cause of death?                                                                                                                                                                                    | radio<br><table border="1"> <tr><td>1</td><td>Yes</td></tr> <tr><td>0</td><td>No</td></tr> <tr><td>99</td><td>Doesn't know</td></tr> <tr><td>88</td><td>Refused to answer</td></tr> </table>                | 1 | Yes   | 0 | No              | 99 | Doesn't know | 88 | Refused to answer |
| 1   | Yes                                                |                                                                                                                                                                                                                                          |                                                                                                                                                                                                             |   |       |   |                 |    |              |    |                   |
| 0   | No                                                 |                                                                                                                                                                                                                                          |                                                                                                                                                                                                             |   |       |   |                 |    |              |    |                   |
| 99  | Doesn't know                                       |                                                                                                                                                                                                                                          |                                                                                                                                                                                                             |   |       |   |                 |    |              |    |                   |
| 88  | Refused to answer                                  |                                                                                                                                                                                                                                          |                                                                                                                                                                                                             |   |       |   |                 |    |              |    |                   |
| 753 | [id10436]<br>Show the field ONLY if: [id10435]='1' | What did the health care worker say?                                                                                                                                                                                                     | text                                                                                                                                                                                                        |   |       |   |                 |    |              |    |                   |

|     |                                                          |                                                                                                                                                                                                                                                                                         |                                                                                                                                                                                                                        |   |     |   |    |    |              |    |                   |
|-----|----------------------------------------------------------|-----------------------------------------------------------------------------------------------------------------------------------------------------------------------------------------------------------------------------------------------------------------------------------------|------------------------------------------------------------------------------------------------------------------------------------------------------------------------------------------------------------------------|---|-----|---|----|----|--------------|----|-------------------|
| 754 | [id10437]                                                | Do you have any health records that belonged to the deceased?                                                                                                                                                                                                                           | radio<br><table border="1"> <tr><td>1</td><td>Yes</td></tr> <tr><td>0</td><td>No</td></tr> <tr><td>99</td><td>Doesn't know</td></tr> <tr><td>88</td><td>Refused to answer</td></tr> </table> Field Annotation: @HIDDEN | 1 | Yes | 0 | No | 99 | Doesn't know | 88 | Refused to answer |
| 1   | Yes                                                      |                                                                                                                                                                                                                                                                                         |                                                                                                                                                                                                                        |   |     |   |    |    |              |    |                   |
| 0   | No                                                       |                                                                                                                                                                                                                                                                                         |                                                                                                                                                                                                                        |   |     |   |    |    |              |    |                   |
| 99  | Doesn't know                                             |                                                                                                                                                                                                                                                                                         |                                                                                                                                                                                                                        |   |     |   |    |    |              |    |                   |
| 88  | Refused to answer                                        |                                                                                                                                                                                                                                                                                         |                                                                                                                                                                                                                        |   |     |   |    |    |              |    |                   |
| 755 | [id10438]<br>Show the field ONLY if: [id10437]='1'       | Can I see the health records?                                                                                                                                                                                                                                                           | radio<br><table border="1"> <tr><td>1</td><td>Yes</td></tr> <tr><td>0</td><td>No</td></tr> <tr><td>99</td><td>Doesn't know</td></tr> <tr><td>88</td><td>Refused to answer</td></tr> </table> Field Annotation: @HIDDEN | 1 | Yes | 0 | No | 99 | Doesn't know | 88 | Refused to answer |
| 1   | Yes                                                      |                                                                                                                                                                                                                                                                                         |                                                                                                                                                                                                                        |   |     |   |    |    |              |    |                   |
| 0   | No                                                       |                                                                                                                                                                                                                                                                                         |                                                                                                                                                                                                                        |   |     |   |    |    |              |    |                   |
| 99  | Doesn't know                                             |                                                                                                                                                                                                                                                                                         |                                                                                                                                                                                                                        |   |     |   |    |    |              |    |                   |
| 88  | Refused to answer                                        |                                                                                                                                                                                                                                                                                         |                                                                                                                                                                                                                        |   |     |   |    |    |              |    |                   |
| 756 | [id10439_check]<br>Show the field ONLY if: [id10438]='1' | [Is the date of the most recent (last) visit available?]                                                                                                                                                                                                                                | radio<br><table border="1"> <tr><td>1</td><td>Yes</td></tr> <tr><td>0</td><td>No</td></tr> </table> Field Annotation: @HIDDEN                                                                                          | 1 | Yes | 0 | No |    |              |    |                   |
| 1   | Yes                                                      |                                                                                                                                                                                                                                                                                         |                                                                                                                                                                                                                        |   |     |   |    |    |              |    |                   |
| 0   | No                                                       |                                                                                                                                                                                                                                                                                         |                                                                                                                                                                                                                        |   |     |   |    |    |              |    |                   |
| 757 | [id10439]<br>Show the field ONLY if: [id10439_check]='1' | [Record the date of the most recent (last) visit]                                                                                                                                                                                                                                       | text (date_dmy)<br>Field Annotation: @HIDDEN                                                                                                                                                                           |   |     |   |    |    |              |    |                   |
| 758 | [id10450]                                                | Section Header: <i>Background and Context</i><br>In the final days before death, did the mother travel with the baby to a hospital or health facility?                                                                                                                                  | radio<br><table border="1"> <tr><td>1</td><td>Yes</td></tr> <tr><td>0</td><td>No</td></tr> <tr><td>99</td><td>Doesn't know</td></tr> <tr><td>88</td><td>Refused to answer</td></tr> </table>                           | 1 | Yes | 0 | No | 99 | Doesn't know | 88 | Refused to answer |
| 1   | Yes                                                      |                                                                                                                                                                                                                                                                                         |                                                                                                                                                                                                                        |   |     |   |    |    |              |    |                   |
| 0   | No                                                       |                                                                                                                                                                                                                                                                                         |                                                                                                                                                                                                                        |   |     |   |    |    |              |    |                   |
| 99  | Doesn't know                                             |                                                                                                                                                                                                                                                                                         |                                                                                                                                                                                                                        |   |     |   |    |    |              |    |                   |
| 88  | Refused to answer                                        |                                                                                                                                                                                                                                                                                         |                                                                                                                                                                                                                        |   |     |   |    |    |              |    |                   |
| 759 | [id10451]<br>Show the field ONLY if: [id10450]='1'       | Did the baby use motorised transport to get to the hospital or health facility?<br><i>For stillbirths and live births delivered in a health facility, answer based on mother's experience.</i>                                                                                          | radio<br><table border="1"> <tr><td>1</td><td>Yes</td></tr> <tr><td>0</td><td>No</td></tr> <tr><td>99</td><td>Doesn't know</td></tr> <tr><td>88</td><td>Refused to answer</td></tr> </table>                           | 1 | Yes | 0 | No | 99 | Doesn't know | 88 | Refused to answer |
| 1   | Yes                                                      |                                                                                                                                                                                                                                                                                         |                                                                                                                                                                                                                        |   |     |   |    |    |              |    |                   |
| 0   | No                                                       |                                                                                                                                                                                                                                                                                         |                                                                                                                                                                                                                        |   |     |   |    |    |              |    |                   |
| 99  | Doesn't know                                             |                                                                                                                                                                                                                                                                                         |                                                                                                                                                                                                                        |   |     |   |    |    |              |    |                   |
| 88  | Refused to answer                                        |                                                                                                                                                                                                                                                                                         |                                                                                                                                                                                                                        |   |     |   |    |    |              |    |                   |
| 760 | [id10452]<br>Show the field ONLY if: [id10450]='1'       | Were there any problems during admission to the hospital or health facility?<br><i>For stillbirths and live births delivered in a health facility, answer based on mother's experience.</i>                                                                                             | radio<br><table border="1"> <tr><td>1</td><td>Yes</td></tr> <tr><td>0</td><td>No</td></tr> <tr><td>99</td><td>Doesn't know</td></tr> <tr><td>88</td><td>Refused to answer</td></tr> </table>                           | 1 | Yes | 0 | No | 99 | Doesn't know | 88 | Refused to answer |
| 1   | Yes                                                      |                                                                                                                                                                                                                                                                                         |                                                                                                                                                                                                                        |   |     |   |    |    |              |    |                   |
| 0   | No                                                       |                                                                                                                                                                                                                                                                                         |                                                                                                                                                                                                                        |   |     |   |    |    |              |    |                   |
| 99  | Doesn't know                                             |                                                                                                                                                                                                                                                                                         |                                                                                                                                                                                                                        |   |     |   |    |    |              |    |                   |
| 88  | Refused to answer                                        |                                                                                                                                                                                                                                                                                         |                                                                                                                                                                                                                        |   |     |   |    |    |              |    |                   |
| 761 | [id10453]<br>Show the field ONLY if: [id10450]='1'       | Were there any problems with the way the baby was treated (medical treatment, procedures, interpersonal attitudes, respect, dignity) in the hospital or health facility?<br><i>For stillbirths and live births delivered in a health facility, answer based on mother's experience.</i> | radio<br><table border="1"> <tr><td>1</td><td>Yes</td></tr> <tr><td>0</td><td>No</td></tr> <tr><td>99</td><td>Doesn't know</td></tr> <tr><td>88</td><td>Refused to answer</td></tr> </table>                           | 1 | Yes | 0 | No | 99 | Doesn't know | 88 | Refused to answer |
| 1   | Yes                                                      |                                                                                                                                                                                                                                                                                         |                                                                                                                                                                                                                        |   |     |   |    |    |              |    |                   |
| 0   | No                                                       |                                                                                                                                                                                                                                                                                         |                                                                                                                                                                                                                        |   |     |   |    |    |              |    |                   |
| 99  | Doesn't know                                             |                                                                                                                                                                                                                                                                                         |                                                                                                                                                                                                                        |   |     |   |    |    |              |    |                   |
| 88  | Refused to answer                                        |                                                                                                                                                                                                                                                                                         |                                                                                                                                                                                                                        |   |     |   |    |    |              |    |                   |
| 762 | [id10454]<br>Show the field ONLY if: [id10450]='1'       | Were there any problems getting medications or diagnostic tests in the hospital or health facility?<br><i>For stillbirths, answer based on mother's experience.</i>                                                                                                                     | radio<br><table border="1"> <tr><td>1</td><td>Yes</td></tr> <tr><td>0</td><td>No</td></tr> <tr><td>99</td><td>Doesn't know</td></tr> <tr><td>88</td><td>Refused to answer</td></tr> </table>                           | 1 | Yes | 0 | No | 99 | Doesn't know | 88 | Refused to answer |
| 1   | Yes                                                      |                                                                                                                                                                                                                                                                                         |                                                                                                                                                                                                                        |   |     |   |    |    |              |    |                   |
| 0   | No                                                       |                                                                                                                                                                                                                                                                                         |                                                                                                                                                                                                                        |   |     |   |    |    |              |    |                   |
| 99  | Doesn't know                                             |                                                                                                                                                                                                                                                                                         |                                                                                                                                                                                                                        |   |     |   |    |    |              |    |                   |
| 88  | Refused to answer                                        |                                                                                                                                                                                                                                                                                         |                                                                                                                                                                                                                        |   |     |   |    |    |              |    |                   |



|     |                                                       |                                                                                                                                                               |                                                                                                                                                                                                                                                                                                                                                                                                                                                                                                                                                                                                                                                                                                                                                                                                                                                                                                                                                                                                                                                                                                                                    |   |            |          |    |            |              |    |                   |              |   |            |           |   |            |                  |   |            |                      |   |            |         |   |            |        |   |            |             |    |             |              |    |             |          |    |             |       |    |             |                |    |             |                                |    |             |      |    |             |                                        |    |             |            |
|-----|-------------------------------------------------------|---------------------------------------------------------------------------------------------------------------------------------------------------------------|------------------------------------------------------------------------------------------------------------------------------------------------------------------------------------------------------------------------------------------------------------------------------------------------------------------------------------------------------------------------------------------------------------------------------------------------------------------------------------------------------------------------------------------------------------------------------------------------------------------------------------------------------------------------------------------------------------------------------------------------------------------------------------------------------------------------------------------------------------------------------------------------------------------------------------------------------------------------------------------------------------------------------------------------------------------------------------------------------------------------------------|---|------------|----------|----|------------|--------------|----|-------------------|--------------|---|------------|-----------|---|------------|------------------|---|------------|----------------------|---|------------|---------|---|------------|--------|---|------------|-------------|----|-------------|--------------|----|-------------|----------|----|-------------|-------|----|-------------|----------------|----|-------------|--------------------------------|----|-------------|------|----|-------------|----------------------------------------|----|-------------|------------|
| 763 | [id10455]<br>Show the field ONLY if:<br>[id10450]='1' | Does it take more than 2 hours to get to the nearest hospital or health facility from the deceased's household?                                               | radio<br><table border="1"> <tr><td>1</td><td>Yes</td></tr> <tr><td>0</td><td>No</td></tr> <tr><td>99</td><td>Doesn't know</td></tr> <tr><td>88</td><td>Refused to answer</td></tr> </table>                                                                                                                                                                                                                                                                                                                                                                                                                                                                                                                                                                                                                                                                                                                                                                                                                                                                                                                                       | 1 | Yes        | 0        | No | 99         | Doesn't know | 88 | Refused to answer |              |   |            |           |   |            |                  |   |            |                      |   |            |         |   |            |        |   |            |             |    |             |              |    |             |          |    |             |       |    |             |                |    |             |                                |    |             |      |    |             |                                        |    |             |            |
| 1   | Yes                                                   |                                                                                                                                                               |                                                                                                                                                                                                                                                                                                                                                                                                                                                                                                                                                                                                                                                                                                                                                                                                                                                                                                                                                                                                                                                                                                                                    |   |            |          |    |            |              |    |                   |              |   |            |           |   |            |                  |   |            |                      |   |            |         |   |            |        |   |            |             |    |             |              |    |             |          |    |             |       |    |             |                |    |             |                                |    |             |      |    |             |                                        |    |             |            |
| 0   | No                                                    |                                                                                                                                                               |                                                                                                                                                                                                                                                                                                                                                                                                                                                                                                                                                                                                                                                                                                                                                                                                                                                                                                                                                                                                                                                                                                                                    |   |            |          |    |            |              |    |                   |              |   |            |           |   |            |                  |   |            |                      |   |            |         |   |            |        |   |            |             |    |             |              |    |             |          |    |             |       |    |             |                |    |             |                                |    |             |      |    |             |                                        |    |             |            |
| 99  | Doesn't know                                          |                                                                                                                                                               |                                                                                                                                                                                                                                                                                                                                                                                                                                                                                                                                                                                                                                                                                                                                                                                                                                                                                                                                                                                                                                                                                                                                    |   |            |          |    |            |              |    |                   |              |   |            |           |   |            |                  |   |            |                      |   |            |         |   |            |        |   |            |             |    |             |              |    |             |          |    |             |       |    |             |                |    |             |                                |    |             |      |    |             |                                        |    |             |            |
| 88  | Refused to answer                                     |                                                                                                                                                               |                                                                                                                                                                                                                                                                                                                                                                                                                                                                                                                                                                                                                                                                                                                                                                                                                                                                                                                                                                                                                                                                                                                                    |   |            |          |    |            |              |    |                   |              |   |            |           |   |            |                  |   |            |                      |   |            |         |   |            |        |   |            |             |    |             |              |    |             |          |    |             |       |    |             |                |    |             |                                |    |             |      |    |             |                                        |    |             |            |
| 764 | [id10456]                                             | In the final days before death, were there any doubts about whether medical care was needed?                                                                  | radio<br><table border="1"> <tr><td>1</td><td>Yes</td></tr> <tr><td>0</td><td>No</td></tr> <tr><td>99</td><td>Doesn't know</td></tr> <tr><td>88</td><td>Refused to answer</td></tr> </table>                                                                                                                                                                                                                                                                                                                                                                                                                                                                                                                                                                                                                                                                                                                                                                                                                                                                                                                                       | 1 | Yes        | 0        | No | 99         | Doesn't know | 88 | Refused to answer |              |   |            |           |   |            |                  |   |            |                      |   |            |         |   |            |        |   |            |             |    |             |              |    |             |          |    |             |       |    |             |                |    |             |                                |    |             |      |    |             |                                        |    |             |            |
| 1   | Yes                                                   |                                                                                                                                                               |                                                                                                                                                                                                                                                                                                                                                                                                                                                                                                                                                                                                                                                                                                                                                                                                                                                                                                                                                                                                                                                                                                                                    |   |            |          |    |            |              |    |                   |              |   |            |           |   |            |                  |   |            |                      |   |            |         |   |            |        |   |            |             |    |             |              |    |             |          |    |             |       |    |             |                |    |             |                                |    |             |      |    |             |                                        |    |             |            |
| 0   | No                                                    |                                                                                                                                                               |                                                                                                                                                                                                                                                                                                                                                                                                                                                                                                                                                                                                                                                                                                                                                                                                                                                                                                                                                                                                                                                                                                                                    |   |            |          |    |            |              |    |                   |              |   |            |           |   |            |                  |   |            |                      |   |            |         |   |            |        |   |            |             |    |             |              |    |             |          |    |             |       |    |             |                |    |             |                                |    |             |      |    |             |                                        |    |             |            |
| 99  | Doesn't know                                          |                                                                                                                                                               |                                                                                                                                                                                                                                                                                                                                                                                                                                                                                                                                                                                                                                                                                                                                                                                                                                                                                                                                                                                                                                                                                                                                    |   |            |          |    |            |              |    |                   |              |   |            |           |   |            |                  |   |            |                      |   |            |         |   |            |        |   |            |             |    |             |              |    |             |          |    |             |       |    |             |                |    |             |                                |    |             |      |    |             |                                        |    |             |            |
| 88  | Refused to answer                                     |                                                                                                                                                               |                                                                                                                                                                                                                                                                                                                                                                                                                                                                                                                                                                                                                                                                                                                                                                                                                                                                                                                                                                                                                                                                                                                                    |   |            |          |    |            |              |    |                   |              |   |            |           |   |            |                  |   |            |                      |   |            |         |   |            |        |   |            |             |    |             |              |    |             |          |    |             |       |    |             |                |    |             |                                |    |             |      |    |             |                                        |    |             |            |
| 765 | [id10457]                                             | In the final days before death, was traditional medicine used?                                                                                                | radio<br><table border="1"> <tr><td>1</td><td>Yes</td></tr> <tr><td>0</td><td>No</td></tr> <tr><td>99</td><td>Doesn't know</td></tr> <tr><td>88</td><td>Refused to answer</td></tr> </table>                                                                                                                                                                                                                                                                                                                                                                                                                                                                                                                                                                                                                                                                                                                                                                                                                                                                                                                                       | 1 | Yes        | 0        | No | 99         | Doesn't know | 88 | Refused to answer |              |   |            |           |   |            |                  |   |            |                      |   |            |         |   |            |        |   |            |             |    |             |              |    |             |          |    |             |       |    |             |                |    |             |                                |    |             |      |    |             |                                        |    |             |            |
| 1   | Yes                                                   |                                                                                                                                                               |                                                                                                                                                                                                                                                                                                                                                                                                                                                                                                                                                                                                                                                                                                                                                                                                                                                                                                                                                                                                                                                                                                                                    |   |            |          |    |            |              |    |                   |              |   |            |           |   |            |                  |   |            |                      |   |            |         |   |            |        |   |            |             |    |             |              |    |             |          |    |             |       |    |             |                |    |             |                                |    |             |      |    |             |                                        |    |             |            |
| 0   | No                                                    |                                                                                                                                                               |                                                                                                                                                                                                                                                                                                                                                                                                                                                                                                                                                                                                                                                                                                                                                                                                                                                                                                                                                                                                                                                                                                                                    |   |            |          |    |            |              |    |                   |              |   |            |           |   |            |                  |   |            |                      |   |            |         |   |            |        |   |            |             |    |             |              |    |             |          |    |             |       |    |             |                |    |             |                                |    |             |      |    |             |                                        |    |             |            |
| 99  | Doesn't know                                          |                                                                                                                                                               |                                                                                                                                                                                                                                                                                                                                                                                                                                                                                                                                                                                                                                                                                                                                                                                                                                                                                                                                                                                                                                                                                                                                    |   |            |          |    |            |              |    |                   |              |   |            |           |   |            |                  |   |            |                      |   |            |         |   |            |        |   |            |             |    |             |              |    |             |          |    |             |       |    |             |                |    |             |                                |    |             |      |    |             |                                        |    |             |            |
| 88  | Refused to answer                                     |                                                                                                                                                               |                                                                                                                                                                                                                                                                                                                                                                                                                                                                                                                                                                                                                                                                                                                                                                                                                                                                                                                                                                                                                                                                                                                                    |   |            |          |    |            |              |    |                   |              |   |            |           |   |            |                  |   |            |                      |   |            |         |   |            |        |   |            |             |    |             |              |    |             |          |    |             |       |    |             |                |    |             |                                |    |             |      |    |             |                                        |    |             |            |
| 766 | [id10458]                                             | In the final days before death, did anyone use a telephone or cell phone to call for help?                                                                    | radio<br><table border="1"> <tr><td>1</td><td>Yes</td></tr> <tr><td>0</td><td>No</td></tr> <tr><td>99</td><td>Doesn't know</td></tr> <tr><td>88</td><td>Refused to answer</td></tr> </table>                                                                                                                                                                                                                                                                                                                                                                                                                                                                                                                                                                                                                                                                                                                                                                                                                                                                                                                                       | 1 | Yes        | 0        | No | 99         | Doesn't know | 88 | Refused to answer |              |   |            |           |   |            |                  |   |            |                      |   |            |         |   |            |        |   |            |             |    |             |              |    |             |          |    |             |       |    |             |                |    |             |                                |    |             |      |    |             |                                        |    |             |            |
| 1   | Yes                                                   |                                                                                                                                                               |                                                                                                                                                                                                                                                                                                                                                                                                                                                                                                                                                                                                                                                                                                                                                                                                                                                                                                                                                                                                                                                                                                                                    |   |            |          |    |            |              |    |                   |              |   |            |           |   |            |                  |   |            |                      |   |            |         |   |            |        |   |            |             |    |             |              |    |             |          |    |             |       |    |             |                |    |             |                                |    |             |      |    |             |                                        |    |             |            |
| 0   | No                                                    |                                                                                                                                                               |                                                                                                                                                                                                                                                                                                                                                                                                                                                                                                                                                                                                                                                                                                                                                                                                                                                                                                                                                                                                                                                                                                                                    |   |            |          |    |            |              |    |                   |              |   |            |           |   |            |                  |   |            |                      |   |            |         |   |            |        |   |            |             |    |             |              |    |             |          |    |             |       |    |             |                |    |             |                                |    |             |      |    |             |                                        |    |             |            |
| 99  | Doesn't know                                          |                                                                                                                                                               |                                                                                                                                                                                                                                                                                                                                                                                                                                                                                                                                                                                                                                                                                                                                                                                                                                                                                                                                                                                                                                                                                                                                    |   |            |          |    |            |              |    |                   |              |   |            |           |   |            |                  |   |            |                      |   |            |         |   |            |        |   |            |             |    |             |              |    |             |          |    |             |       |    |             |                |    |             |                                |    |             |      |    |             |                                        |    |             |            |
| 88  | Refused to answer                                     |                                                                                                                                                               |                                                                                                                                                                                                                                                                                                                                                                                                                                                                                                                                                                                                                                                                                                                                                                                                                                                                                                                                                                                                                                                                                                                                    |   |            |          |    |            |              |    |                   |              |   |            |           |   |            |                  |   |            |                      |   |            |         |   |            |        |   |            |             |    |             |              |    |             |          |    |             |       |    |             |                |    |             |                                |    |             |      |    |             |                                        |    |             |            |
| 767 | [id10459]                                             | Over the course of illness, did the total costs of care and treatment prohibit other household payments?                                                      | radio<br><table border="1"> <tr><td>1</td><td>Yes</td></tr> <tr><td>0</td><td>No</td></tr> <tr><td>99</td><td>Doesn't know</td></tr> <tr><td>88</td><td>Refused to answer</td></tr> </table>                                                                                                                                                                                                                                                                                                                                                                                                                                                                                                                                                                                                                                                                                                                                                                                                                                                                                                                                       | 1 | Yes        | 0        | No | 99         | Doesn't know | 88 | Refused to answer |              |   |            |           |   |            |                  |   |            |                      |   |            |         |   |            |        |   |            |             |    |             |              |    |             |          |    |             |       |    |             |                |    |             |                                |    |             |      |    |             |                                        |    |             |            |
| 1   | Yes                                                   |                                                                                                                                                               |                                                                                                                                                                                                                                                                                                                                                                                                                                                                                                                                                                                                                                                                                                                                                                                                                                                                                                                                                                                                                                                                                                                                    |   |            |          |    |            |              |    |                   |              |   |            |           |   |            |                  |   |            |                      |   |            |         |   |            |        |   |            |             |    |             |              |    |             |          |    |             |       |    |             |                |    |             |                                |    |             |      |    |             |                                        |    |             |            |
| 0   | No                                                    |                                                                                                                                                               |                                                                                                                                                                                                                                                                                                                                                                                                                                                                                                                                                                                                                                                                                                                                                                                                                                                                                                                                                                                                                                                                                                                                    |   |            |          |    |            |              |    |                   |              |   |            |           |   |            |                  |   |            |                      |   |            |         |   |            |        |   |            |             |    |             |              |    |             |          |    |             |       |    |             |                |    |             |                                |    |             |      |    |             |                                        |    |             |            |
| 99  | Doesn't know                                          |                                                                                                                                                               |                                                                                                                                                                                                                                                                                                                                                                                                                                                                                                                                                                                                                                                                                                                                                                                                                                                                                                                                                                                                                                                                                                                                    |   |            |          |    |            |              |    |                   |              |   |            |           |   |            |                  |   |            |                      |   |            |         |   |            |        |   |            |             |    |             |              |    |             |          |    |             |       |    |             |                |    |             |                                |    |             |      |    |             |                                        |    |             |            |
| 88  | Refused to answer                                     |                                                                                                                                                               |                                                                                                                                                                                                                                                                                                                                                                                                                                                                                                                                                                                                                                                                                                                                                                                                                                                                                                                                                                                                                                                                                                                                    |   |            |          |    |            |              |    |                   |              |   |            |           |   |            |                  |   |            |                      |   |            |         |   |            |        |   |            |             |    |             |              |    |             |          |    |             |       |    |             |                |    |             |                                |    |             |      |    |             |                                        |    |             |            |
| 768 | [id10476]                                             | Section Header: <i>Open Narrative</i><br>Thank you for your information. Now can you please tell me in your own words about the events that led to the death? | notes                                                                                                                                                                                                                                                                                                                                                                                                                                                                                                                                                                                                                                                                                                                                                                                                                                                                                                                                                                                                                                                                                                                              |   |            |          |    |            |              |    |                   |              |   |            |           |   |            |                  |   |            |                      |   |            |         |   |            |        |   |            |             |    |             |              |    |             |          |    |             |       |    |             |                |    |             |                                |    |             |      |    |             |                                        |    |             |            |
| 769 | [id10478]                                             | [Select any of the following words that were mentioned as present in the narrative.]                                                                          | checkbox<br><table border="1"> <tr><td>1</td><td>id10478__1</td><td>Asphyxia</td></tr> <tr><td>2</td><td>id10478__2</td><td>Incubator</td></tr> <tr><td>3</td><td>id10478__3</td><td>Lung problem</td></tr> <tr><td>4</td><td>id10478__4</td><td>Pneumonia</td></tr> <tr><td>5</td><td>id10478__5</td><td>Preterm delivery</td></tr> <tr><td>6</td><td>id10478__6</td><td>Respiratory distress</td></tr> <tr><td>7</td><td>id10478__7</td><td>Abdomen</td></tr> <tr><td>8</td><td>id10478__8</td><td>Cancer</td></tr> <tr><td>9</td><td>id10478__9</td><td>Dehydration</td></tr> <tr><td>10</td><td>id10478__10</td><td>Dengue fever</td></tr> <tr><td>11</td><td>id10478__11</td><td>Diarrhea</td></tr> <tr><td>12</td><td>id10478__12</td><td>Fever</td></tr> <tr><td>13</td><td>id10478__13</td><td>Heart problems</td></tr> <tr><td>14</td><td>id10478__14</td><td>Jaundice (yellow skin or eyes)</td></tr> <tr><td>15</td><td>id10478__15</td><td>Rash</td></tr> <tr><td>16</td><td>id10478__16</td><td>None of the above words were mentioned</td></tr> <tr><td>99</td><td>id10478__99</td><td>Don't know</td></tr> </table> | 1 | id10478__1 | Asphyxia | 2  | id10478__2 | Incubator    | 3  | id10478__3        | Lung problem | 4 | id10478__4 | Pneumonia | 5 | id10478__5 | Preterm delivery | 6 | id10478__6 | Respiratory distress | 7 | id10478__7 | Abdomen | 8 | id10478__8 | Cancer | 9 | id10478__9 | Dehydration | 10 | id10478__10 | Dengue fever | 11 | id10478__11 | Diarrhea | 12 | id10478__12 | Fever | 13 | id10478__13 | Heart problems | 14 | id10478__14 | Jaundice (yellow skin or eyes) | 15 | id10478__15 | Rash | 16 | id10478__16 | None of the above words were mentioned | 99 | id10478__99 | Don't know |
| 1   | id10478__1                                            | Asphyxia                                                                                                                                                      |                                                                                                                                                                                                                                                                                                                                                                                                                                                                                                                                                                                                                                                                                                                                                                                                                                                                                                                                                                                                                                                                                                                                    |   |            |          |    |            |              |    |                   |              |   |            |           |   |            |                  |   |            |                      |   |            |         |   |            |        |   |            |             |    |             |              |    |             |          |    |             |       |    |             |                |    |             |                                |    |             |      |    |             |                                        |    |             |            |
| 2   | id10478__2                                            | Incubator                                                                                                                                                     |                                                                                                                                                                                                                                                                                                                                                                                                                                                                                                                                                                                                                                                                                                                                                                                                                                                                                                                                                                                                                                                                                                                                    |   |            |          |    |            |              |    |                   |              |   |            |           |   |            |                  |   |            |                      |   |            |         |   |            |        |   |            |             |    |             |              |    |             |          |    |             |       |    |             |                |    |             |                                |    |             |      |    |             |                                        |    |             |            |
| 3   | id10478__3                                            | Lung problem                                                                                                                                                  |                                                                                                                                                                                                                                                                                                                                                                                                                                                                                                                                                                                                                                                                                                                                                                                                                                                                                                                                                                                                                                                                                                                                    |   |            |          |    |            |              |    |                   |              |   |            |           |   |            |                  |   |            |                      |   |            |         |   |            |        |   |            |             |    |             |              |    |             |          |    |             |       |    |             |                |    |             |                                |    |             |      |    |             |                                        |    |             |            |
| 4   | id10478__4                                            | Pneumonia                                                                                                                                                     |                                                                                                                                                                                                                                                                                                                                                                                                                                                                                                                                                                                                                                                                                                                                                                                                                                                                                                                                                                                                                                                                                                                                    |   |            |          |    |            |              |    |                   |              |   |            |           |   |            |                  |   |            |                      |   |            |         |   |            |        |   |            |             |    |             |              |    |             |          |    |             |       |    |             |                |    |             |                                |    |             |      |    |             |                                        |    |             |            |
| 5   | id10478__5                                            | Preterm delivery                                                                                                                                              |                                                                                                                                                                                                                                                                                                                                                                                                                                                                                                                                                                                                                                                                                                                                                                                                                                                                                                                                                                                                                                                                                                                                    |   |            |          |    |            |              |    |                   |              |   |            |           |   |            |                  |   |            |                      |   |            |         |   |            |        |   |            |             |    |             |              |    |             |          |    |             |       |    |             |                |    |             |                                |    |             |      |    |             |                                        |    |             |            |
| 6   | id10478__6                                            | Respiratory distress                                                                                                                                          |                                                                                                                                                                                                                                                                                                                                                                                                                                                                                                                                                                                                                                                                                                                                                                                                                                                                                                                                                                                                                                                                                                                                    |   |            |          |    |            |              |    |                   |              |   |            |           |   |            |                  |   |            |                      |   |            |         |   |            |        |   |            |             |    |             |              |    |             |          |    |             |       |    |             |                |    |             |                                |    |             |      |    |             |                                        |    |             |            |
| 7   | id10478__7                                            | Abdomen                                                                                                                                                       |                                                                                                                                                                                                                                                                                                                                                                                                                                                                                                                                                                                                                                                                                                                                                                                                                                                                                                                                                                                                                                                                                                                                    |   |            |          |    |            |              |    |                   |              |   |            |           |   |            |                  |   |            |                      |   |            |         |   |            |        |   |            |             |    |             |              |    |             |          |    |             |       |    |             |                |    |             |                                |    |             |      |    |             |                                        |    |             |            |
| 8   | id10478__8                                            | Cancer                                                                                                                                                        |                                                                                                                                                                                                                                                                                                                                                                                                                                                                                                                                                                                                                                                                                                                                                                                                                                                                                                                                                                                                                                                                                                                                    |   |            |          |    |            |              |    |                   |              |   |            |           |   |            |                  |   |            |                      |   |            |         |   |            |        |   |            |             |    |             |              |    |             |          |    |             |       |    |             |                |    |             |                                |    |             |      |    |             |                                        |    |             |            |
| 9   | id10478__9                                            | Dehydration                                                                                                                                                   |                                                                                                                                                                                                                                                                                                                                                                                                                                                                                                                                                                                                                                                                                                                                                                                                                                                                                                                                                                                                                                                                                                                                    |   |            |          |    |            |              |    |                   |              |   |            |           |   |            |                  |   |            |                      |   |            |         |   |            |        |   |            |             |    |             |              |    |             |          |    |             |       |    |             |                |    |             |                                |    |             |      |    |             |                                        |    |             |            |
| 10  | id10478__10                                           | Dengue fever                                                                                                                                                  |                                                                                                                                                                                                                                                                                                                                                                                                                                                                                                                                                                                                                                                                                                                                                                                                                                                                                                                                                                                                                                                                                                                                    |   |            |          |    |            |              |    |                   |              |   |            |           |   |            |                  |   |            |                      |   |            |         |   |            |        |   |            |             |    |             |              |    |             |          |    |             |       |    |             |                |    |             |                                |    |             |      |    |             |                                        |    |             |            |
| 11  | id10478__11                                           | Diarrhea                                                                                                                                                      |                                                                                                                                                                                                                                                                                                                                                                                                                                                                                                                                                                                                                                                                                                                                                                                                                                                                                                                                                                                                                                                                                                                                    |   |            |          |    |            |              |    |                   |              |   |            |           |   |            |                  |   |            |                      |   |            |         |   |            |        |   |            |             |    |             |              |    |             |          |    |             |       |    |             |                |    |             |                                |    |             |      |    |             |                                        |    |             |            |
| 12  | id10478__12                                           | Fever                                                                                                                                                         |                                                                                                                                                                                                                                                                                                                                                                                                                                                                                                                                                                                                                                                                                                                                                                                                                                                                                                                                                                                                                                                                                                                                    |   |            |          |    |            |              |    |                   |              |   |            |           |   |            |                  |   |            |                      |   |            |         |   |            |        |   |            |             |    |             |              |    |             |          |    |             |       |    |             |                |    |             |                                |    |             |      |    |             |                                        |    |             |            |
| 13  | id10478__13                                           | Heart problems                                                                                                                                                |                                                                                                                                                                                                                                                                                                                                                                                                                                                                                                                                                                                                                                                                                                                                                                                                                                                                                                                                                                                                                                                                                                                                    |   |            |          |    |            |              |    |                   |              |   |            |           |   |            |                  |   |            |                      |   |            |         |   |            |        |   |            |             |    |             |              |    |             |          |    |             |       |    |             |                |    |             |                                |    |             |      |    |             |                                        |    |             |            |
| 14  | id10478__14                                           | Jaundice (yellow skin or eyes)                                                                                                                                |                                                                                                                                                                                                                                                                                                                                                                                                                                                                                                                                                                                                                                                                                                                                                                                                                                                                                                                                                                                                                                                                                                                                    |   |            |          |    |            |              |    |                   |              |   |            |           |   |            |                  |   |            |                      |   |            |         |   |            |        |   |            |             |    |             |              |    |             |          |    |             |       |    |             |                |    |             |                                |    |             |      |    |             |                                        |    |             |            |
| 15  | id10478__15                                           | Rash                                                                                                                                                          |                                                                                                                                                                                                                                                                                                                                                                                                                                                                                                                                                                                                                                                                                                                                                                                                                                                                                                                                                                                                                                                                                                                                    |   |            |          |    |            |              |    |                   |              |   |            |           |   |            |                  |   |            |                      |   |            |         |   |            |        |   |            |             |    |             |              |    |             |          |    |             |       |    |             |                |    |             |                                |    |             |      |    |             |                                        |    |             |            |
| 16  | id10478__16                                           | None of the above words were mentioned                                                                                                                        |                                                                                                                                                                                                                                                                                                                                                                                                                                                                                                                                                                                                                                                                                                                                                                                                                                                                                                                                                                                                                                                                                                                                    |   |            |          |    |            |              |    |                   |              |   |            |           |   |            |                  |   |            |                      |   |            |         |   |            |        |   |            |             |    |             |              |    |             |          |    |             |       |    |             |                |    |             |                                |    |             |      |    |             |                                        |    |             |            |
| 99  | id10478__99                                           | Don't know                                                                                                                                                    |                                                                                                                                                                                                                                                                                                                                                                                                                                                                                                                                                                                                                                                                                                                                                                                                                                                                                                                                                                                                                                                                                                                                    |   |            |          |    |            |              |    |                   |              |   |            |           |   |            |                  |   |            |                      |   |            |         |   |            |        |   |            |             |    |             |              |    |             |          |    |             |       |    |             |                |    |             |                                |    |             |      |    |             |                                        |    |             |            |

|     |                                                                                                                                                                                                                                                                                                                                                                                                               |                                                                                                                                                |                                                                                                                                                                                                       |   |            |   |            |   |          |
|-----|---------------------------------------------------------------------------------------------------------------------------------------------------------------------------------------------------------------------------------------------------------------------------------------------------------------------------------------------------------------------------------------------------------------|------------------------------------------------------------------------------------------------------------------------------------------------|-------------------------------------------------------------------------------------------------------------------------------------------------------------------------------------------------------|---|------------|---|------------|---|----------|
| 770 | <p>[id10478_check]</p> <p>Show the field ONLY if:<br/>       ([id10478(1)]=1' or [id10478(2)]=1' or [id10478(3)]=1' or [id10478(4)]=1' or [id10478(5)]=1' or [id10478(6)]=1' or [id10478(7)]=1' or [id10478(8)]=1' or [id10478(9)]=1' or [id10478(10)]=1' or [id10478(11)]=1' or [id10478(12)]=1' or [id10478(13)]=1' or [id10478(14)]=1' or [id10478(15)]=1') and ([id10478(16)]=1' or [id10478(99)]=1')</p> | <p>It is not possible to select "Don't know" or "None of the above" together with other options. Please go back and correct the selection.</p> | <p>descriptive</p>                                                                                                                                                                                    |   |            |   |            |   |          |
| 771 | <p>[verbal_autopsy_newborn_complete]</p>                                                                                                                                                                                                                                                                                                                                                                      | <p>Section Header: <i>Form Status</i><br/>         Complete?</p>                                                                               | <p>dropdown</p> <table border="1" data-bbox="1031 514 1177 630"> <tr> <td>0</td> <td>Incomplete</td> </tr> <tr> <td>1</td> <td>Unverified</td> </tr> <tr> <td>2</td> <td>Complete</td> </tr> </table> | 0 | Incomplete | 1 | Unverified | 2 | Complete |
| 0   | Incomplete                                                                                                                                                                                                                                                                                                                                                                                                    |                                                                                                                                                |                                                                                                                                                                                                       |   |            |   |            |   |          |
| 1   | Unverified                                                                                                                                                                                                                                                                                                                                                                                                    |                                                                                                                                                |                                                                                                                                                                                                       |   |            |   |            |   |          |
| 2   | Complete                                                                                                                                                                                                                                                                                                                                                                                                      |                                                                                                                                                |                                                                                                                                                                                                       |   |            |   |            |   |          |
